# Supplementary material for: Sensitivity to the visual field origin of natural image patches in human low-level visual cortex
Source: PeerJ journal article supplement (doi:10.7717/peerj.1038), 2015-06-23

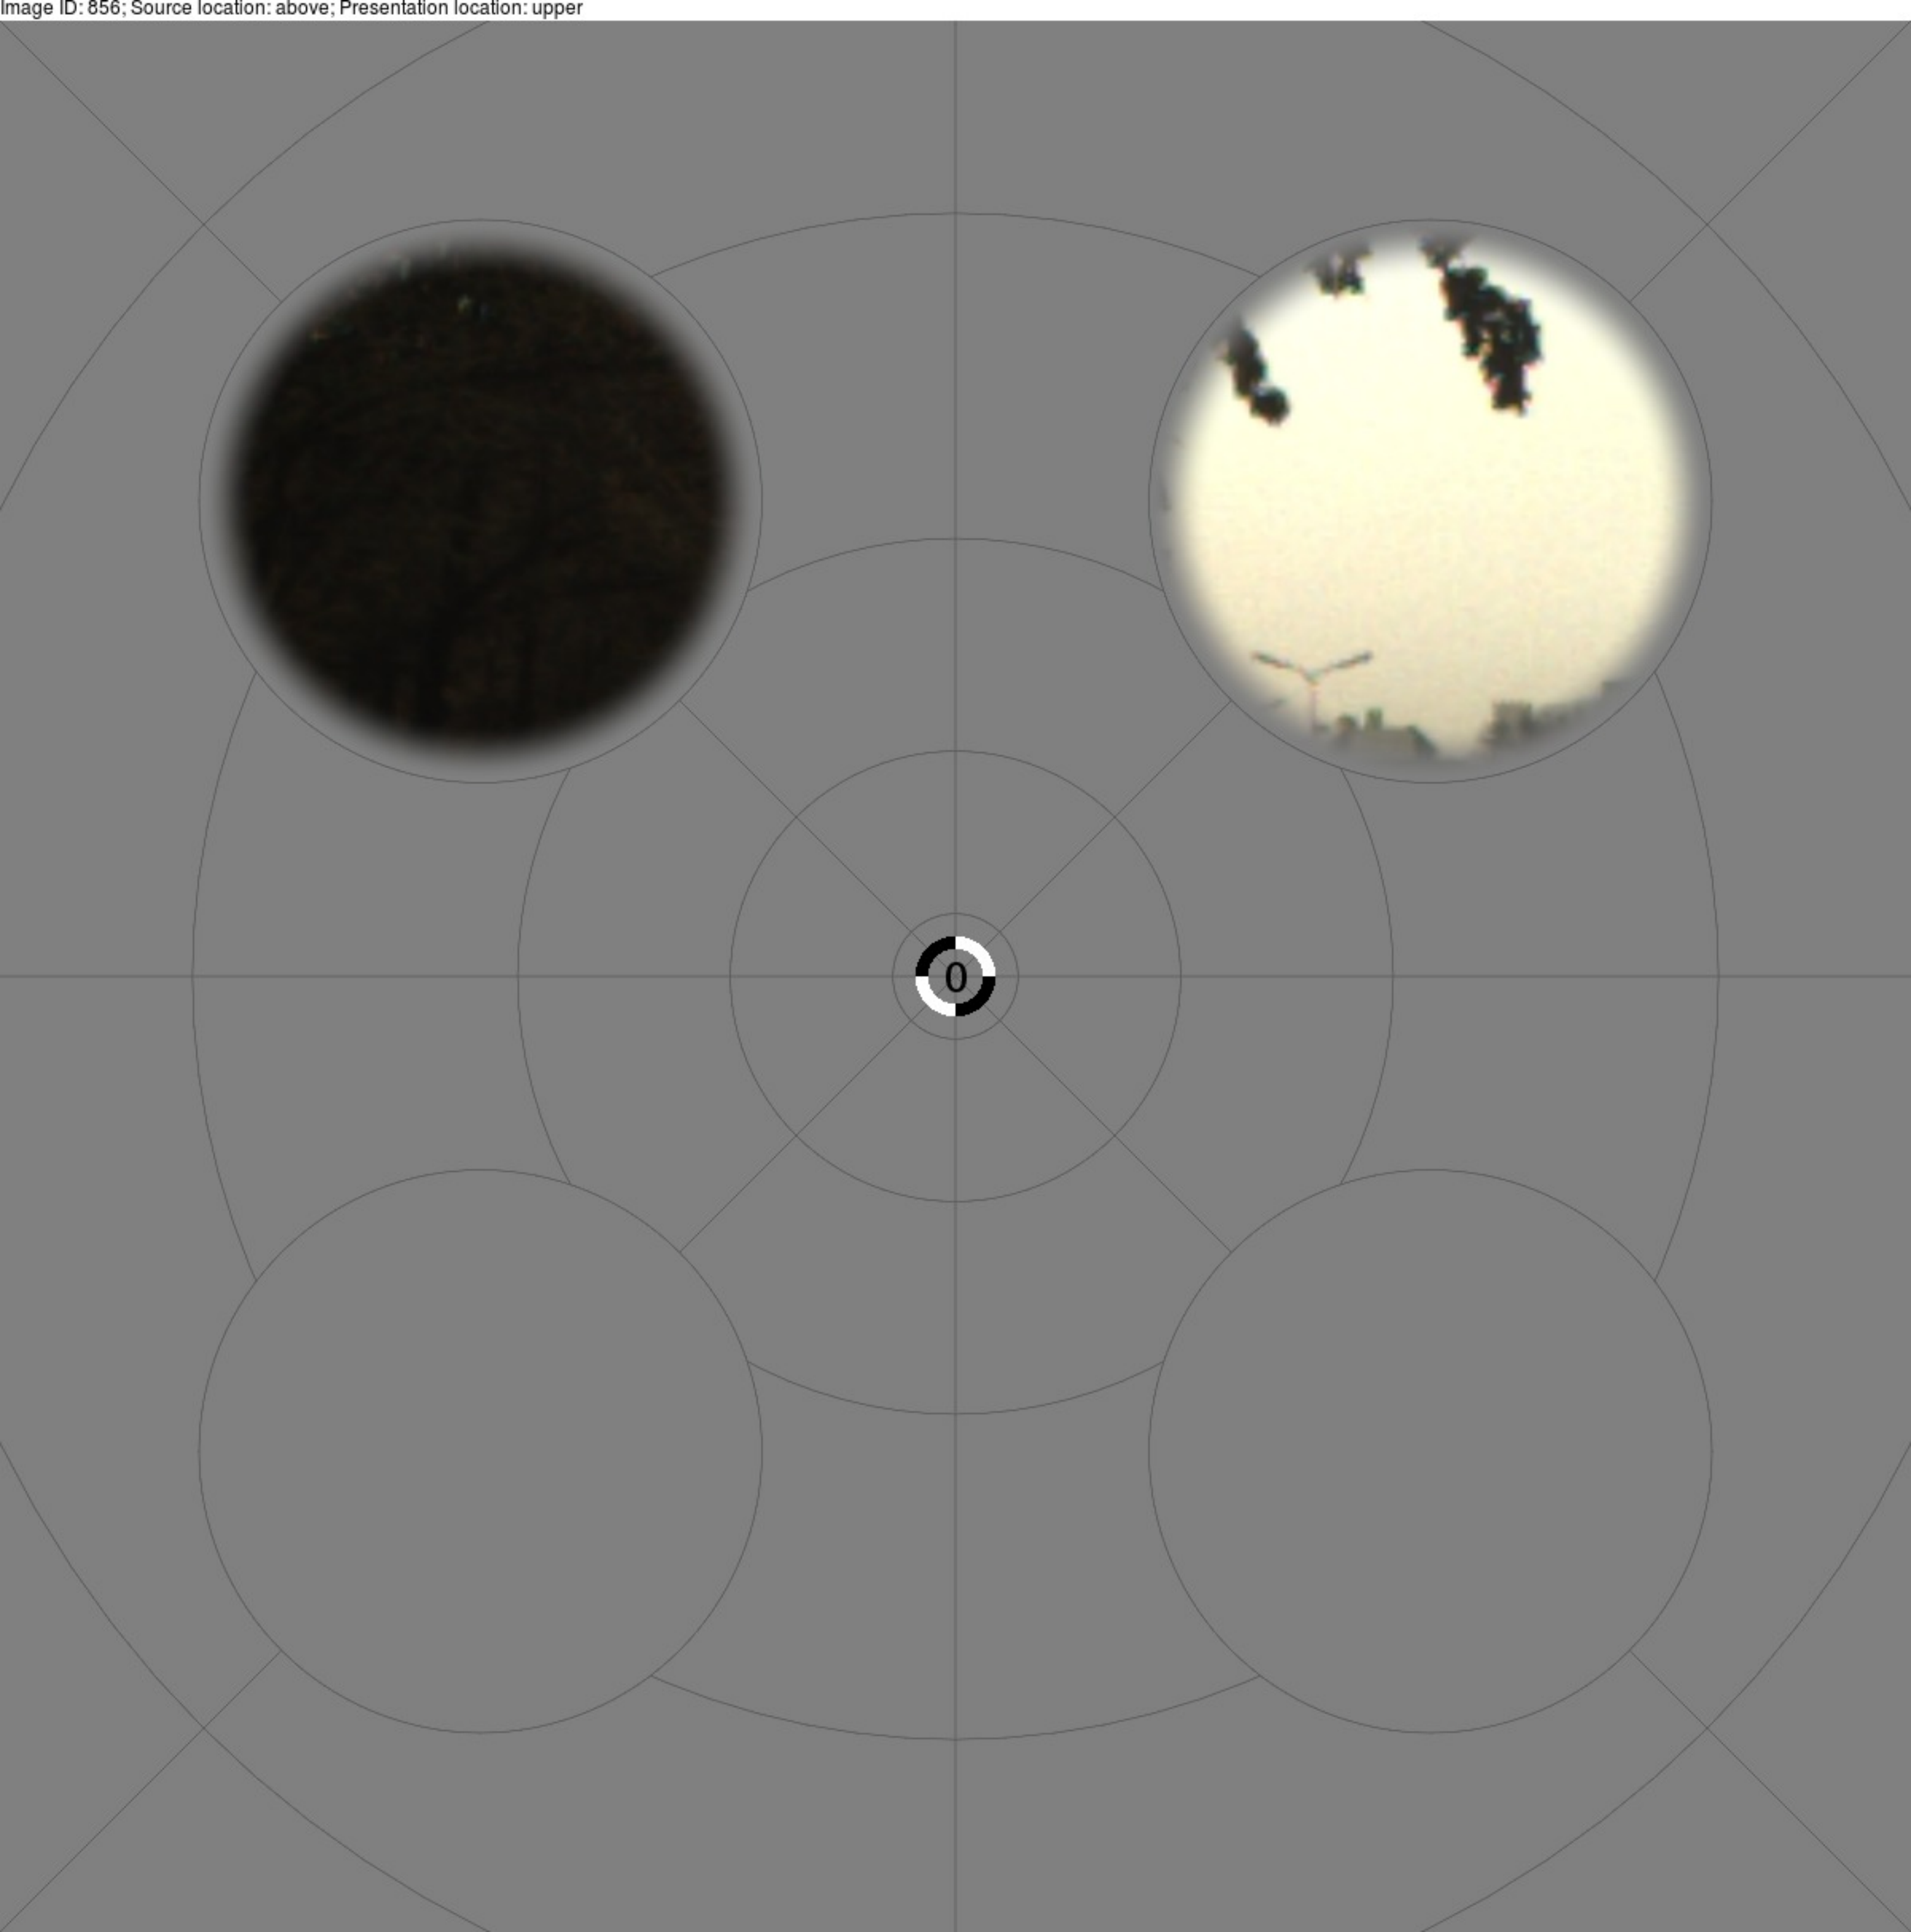

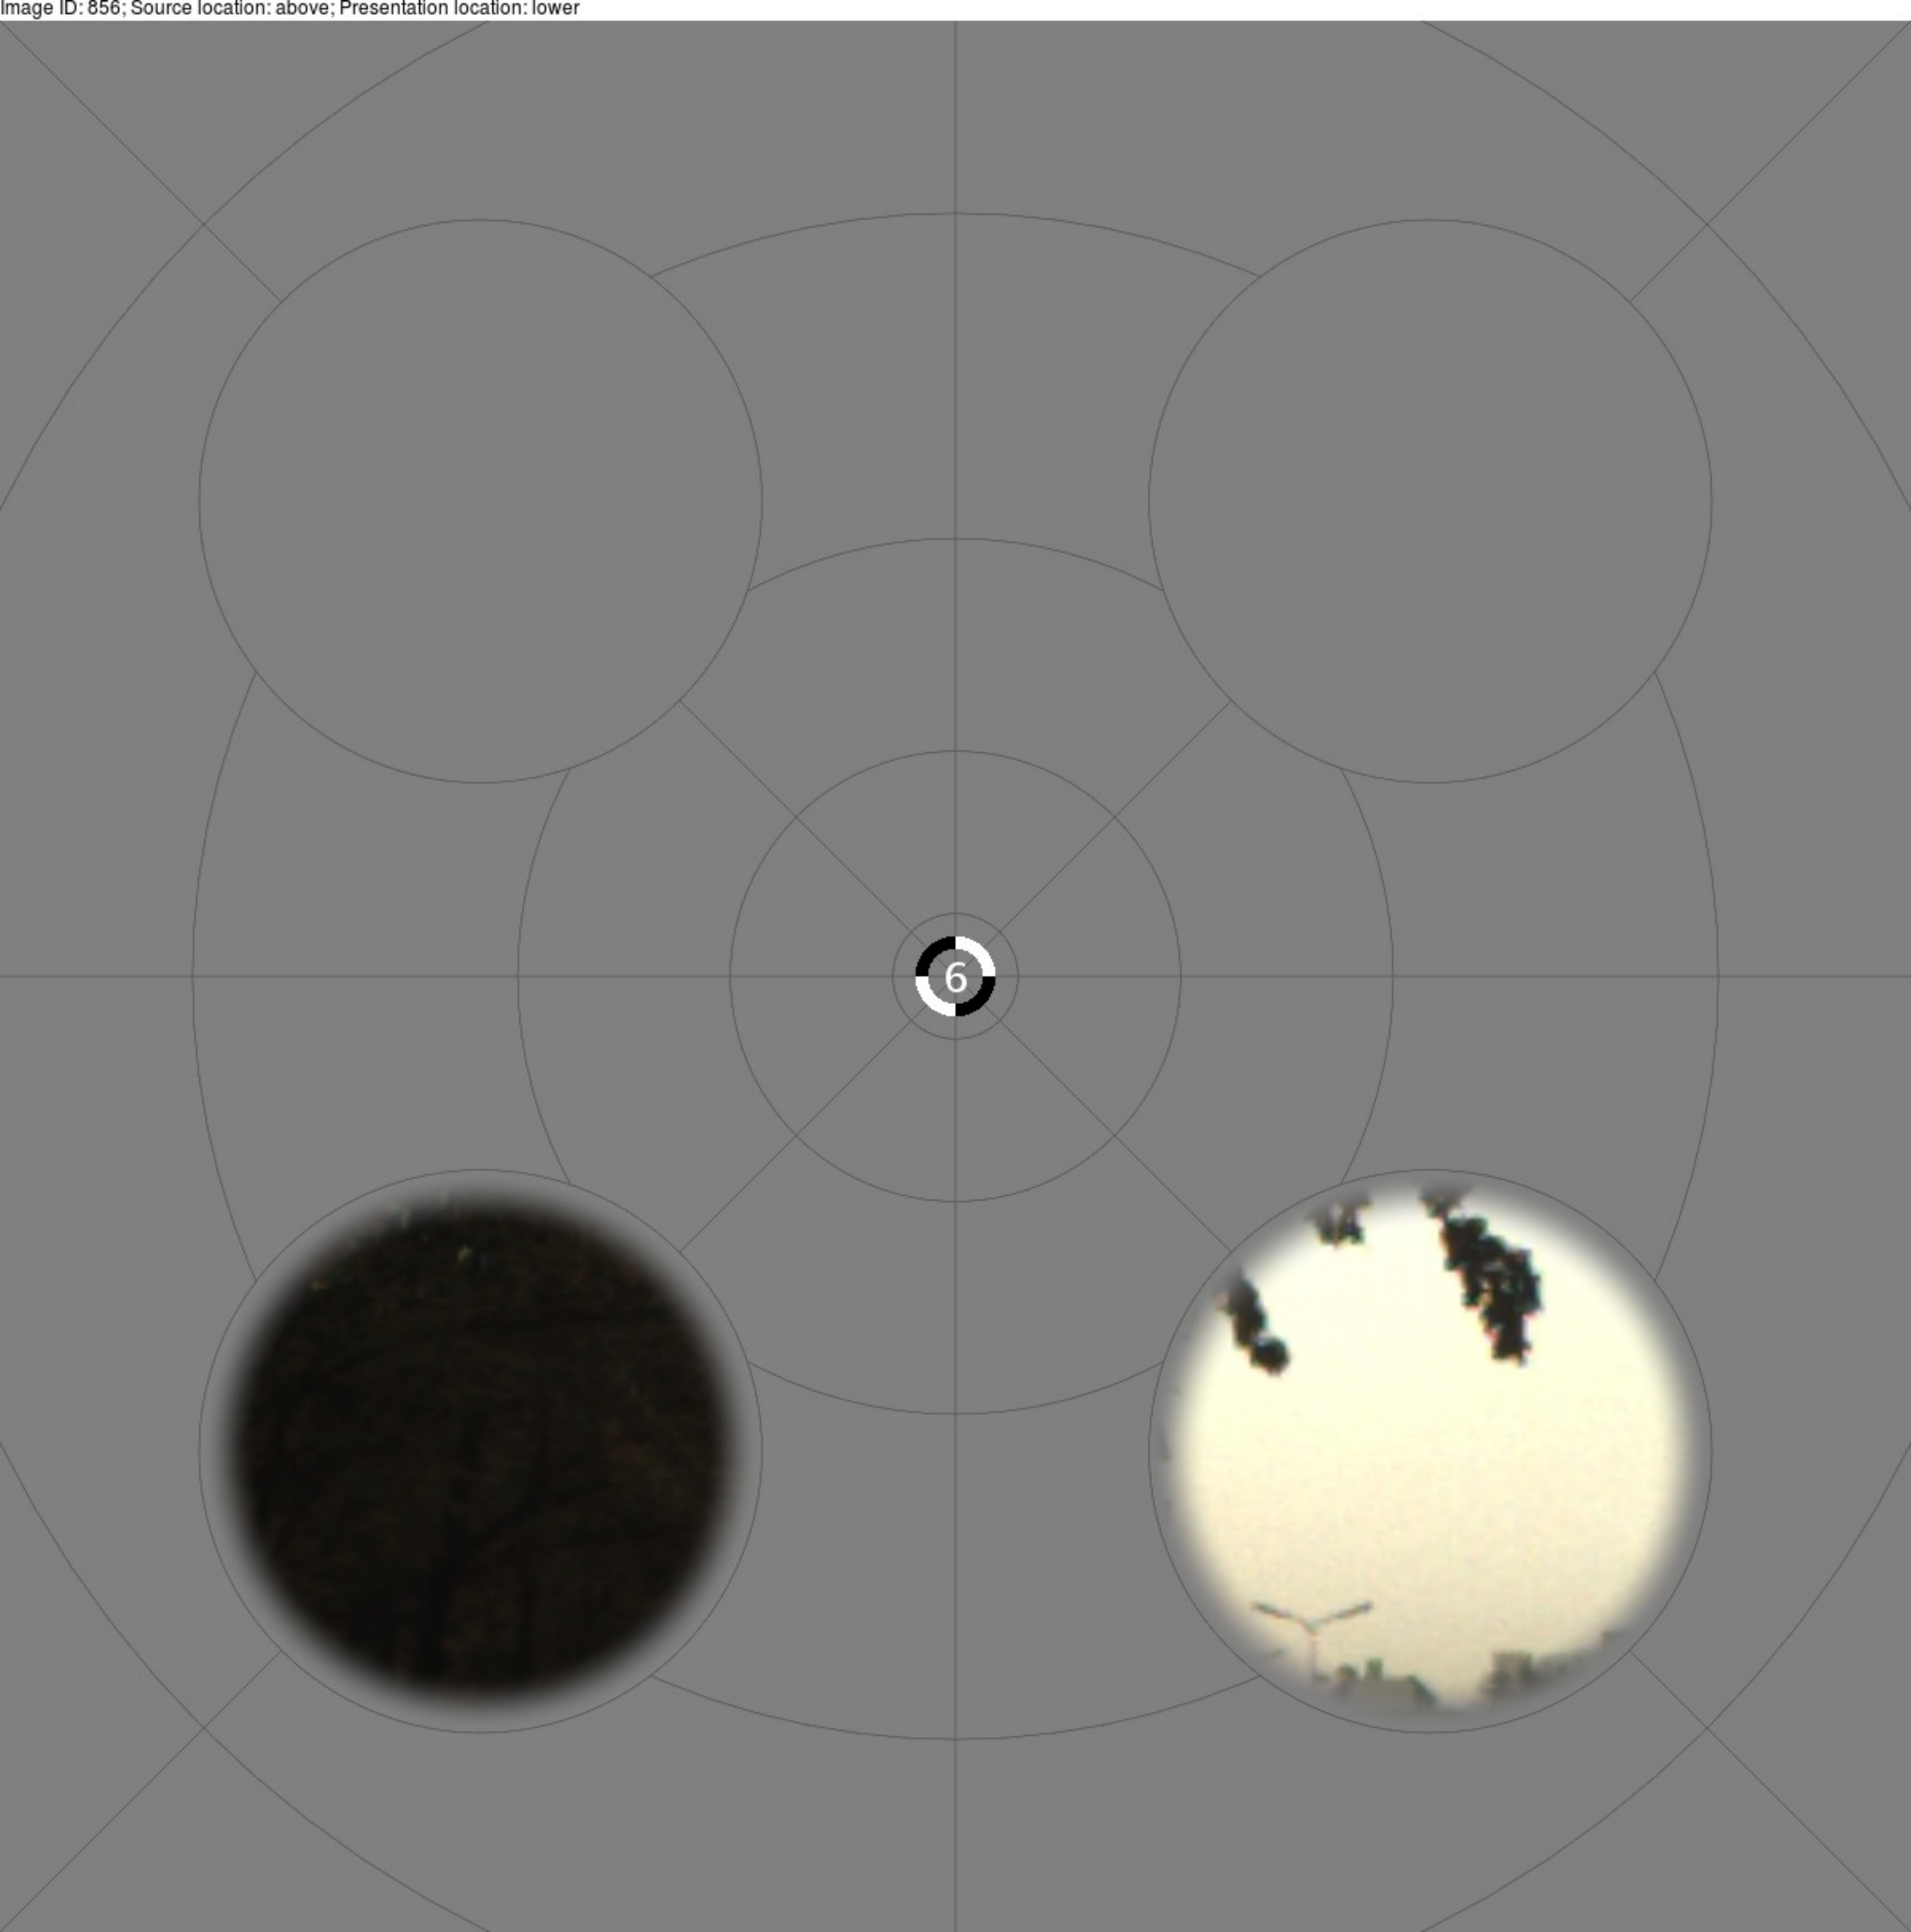

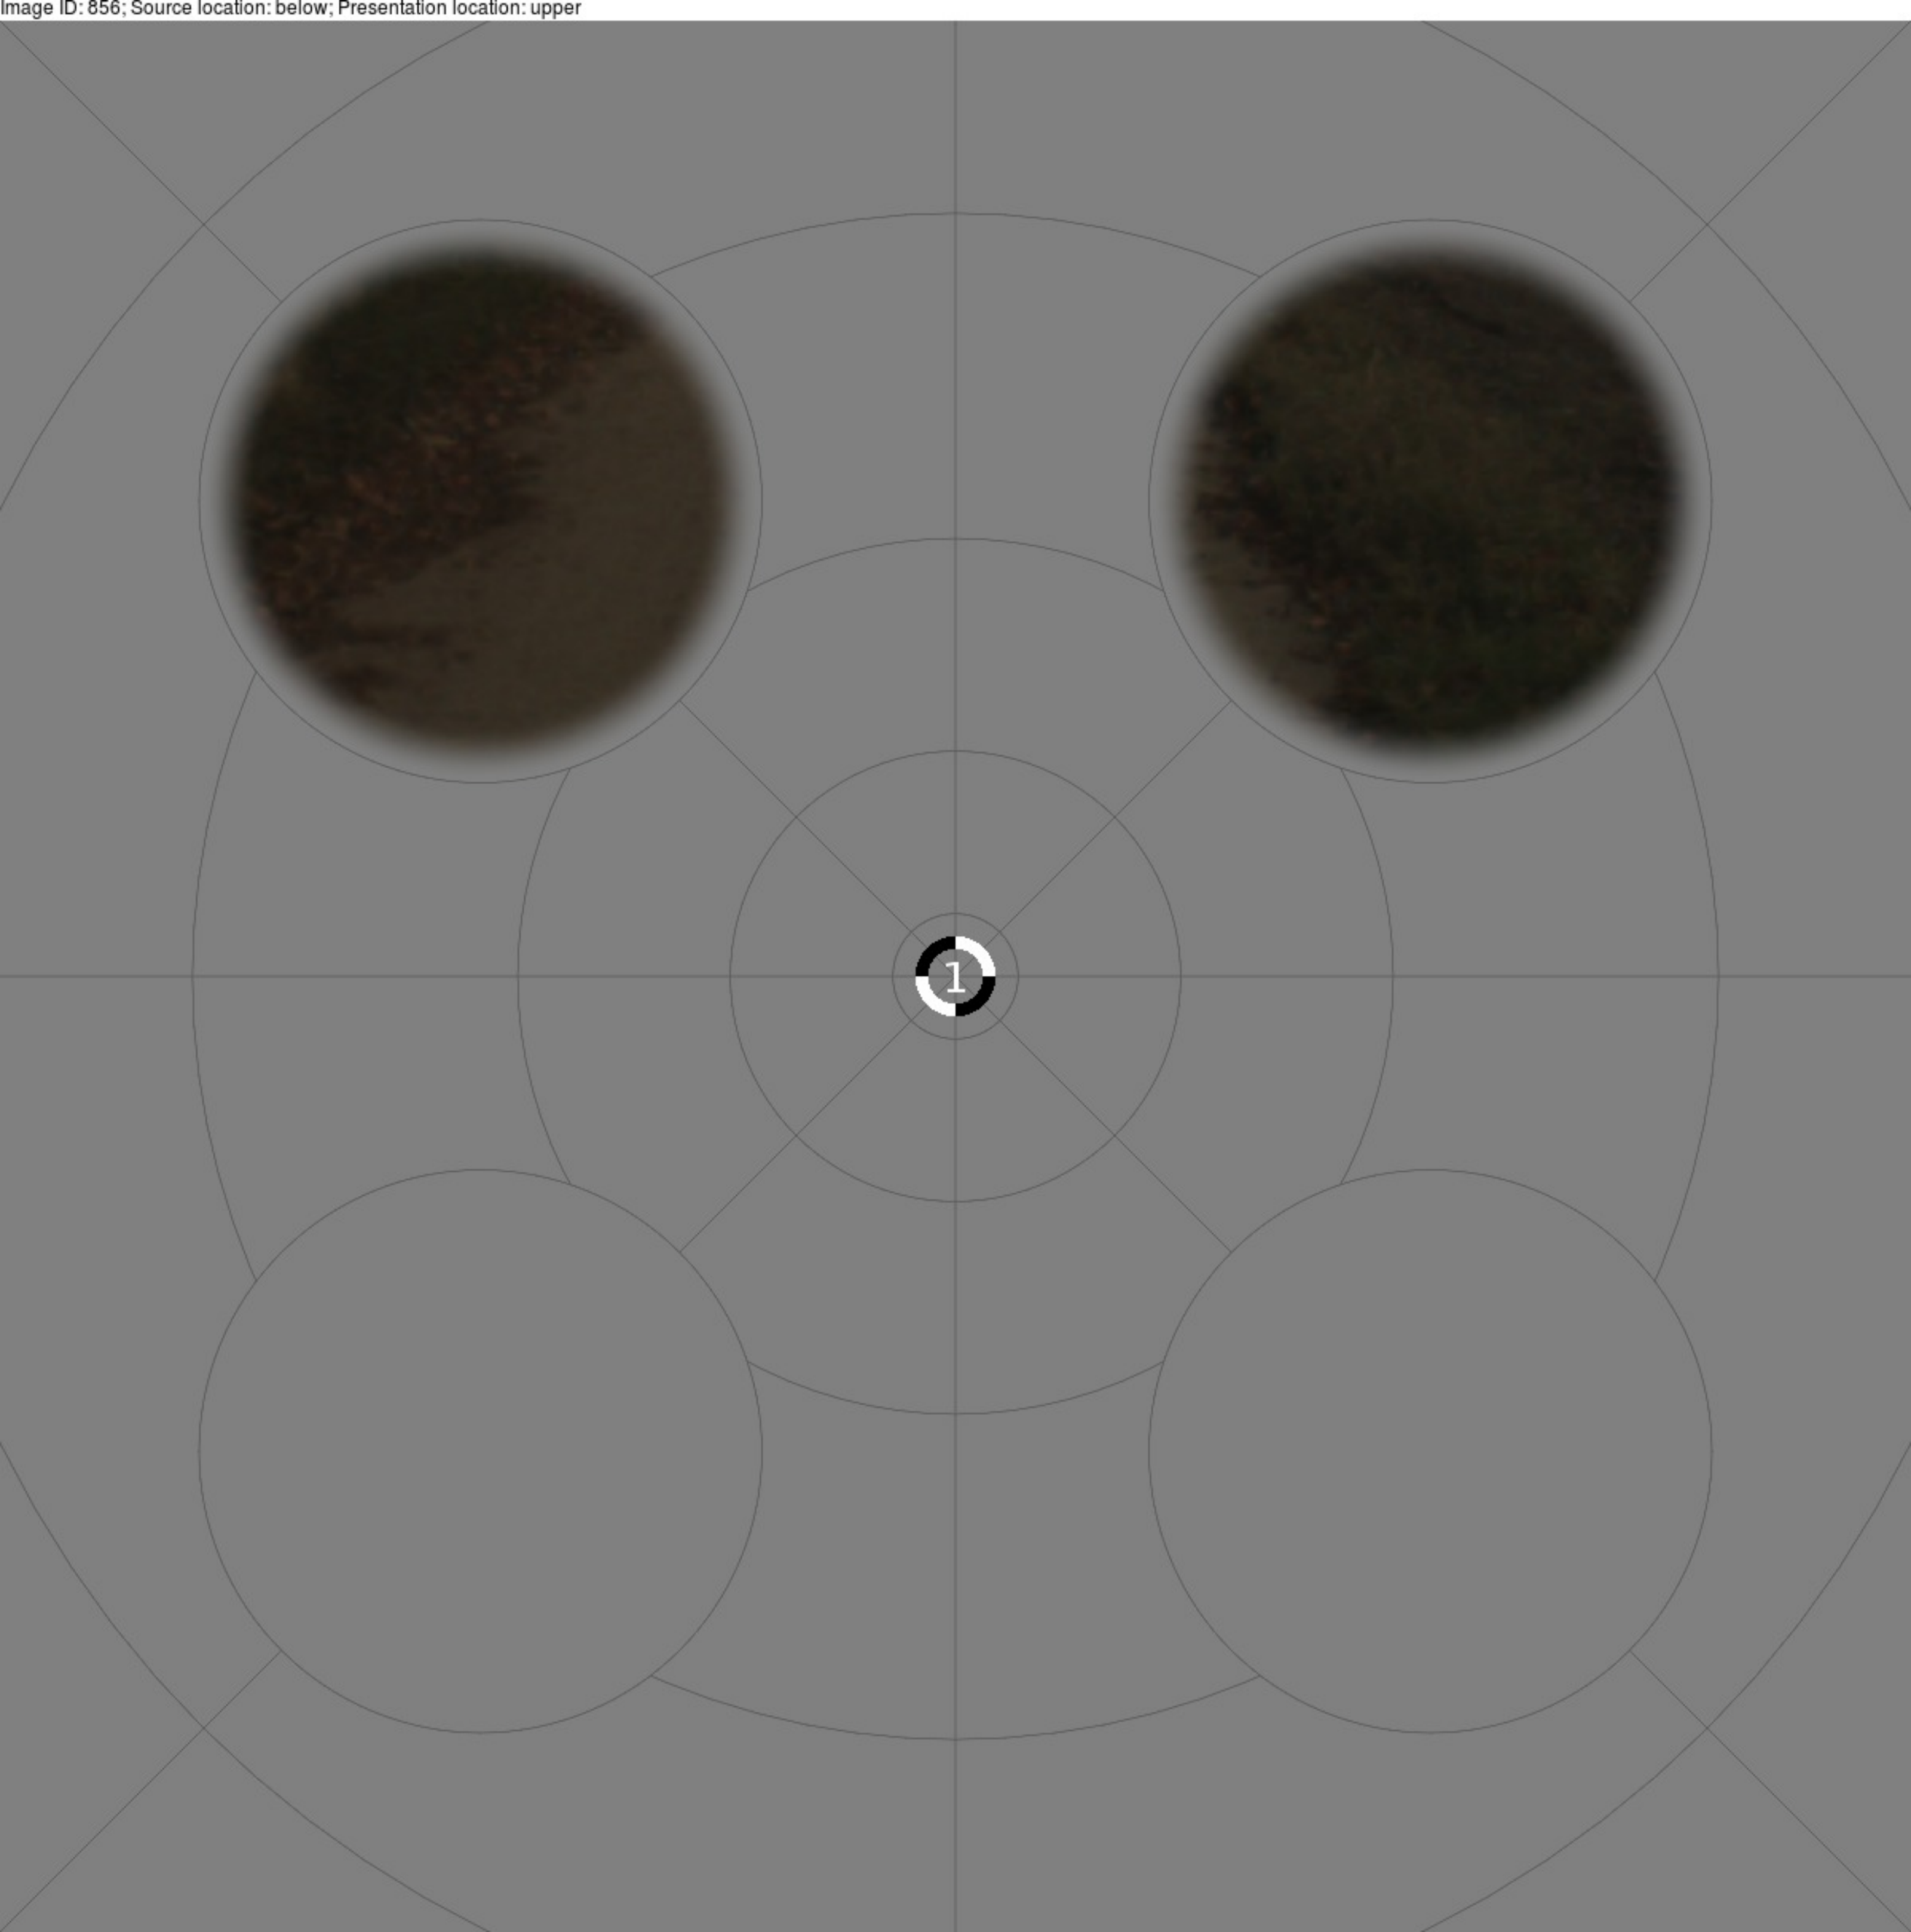



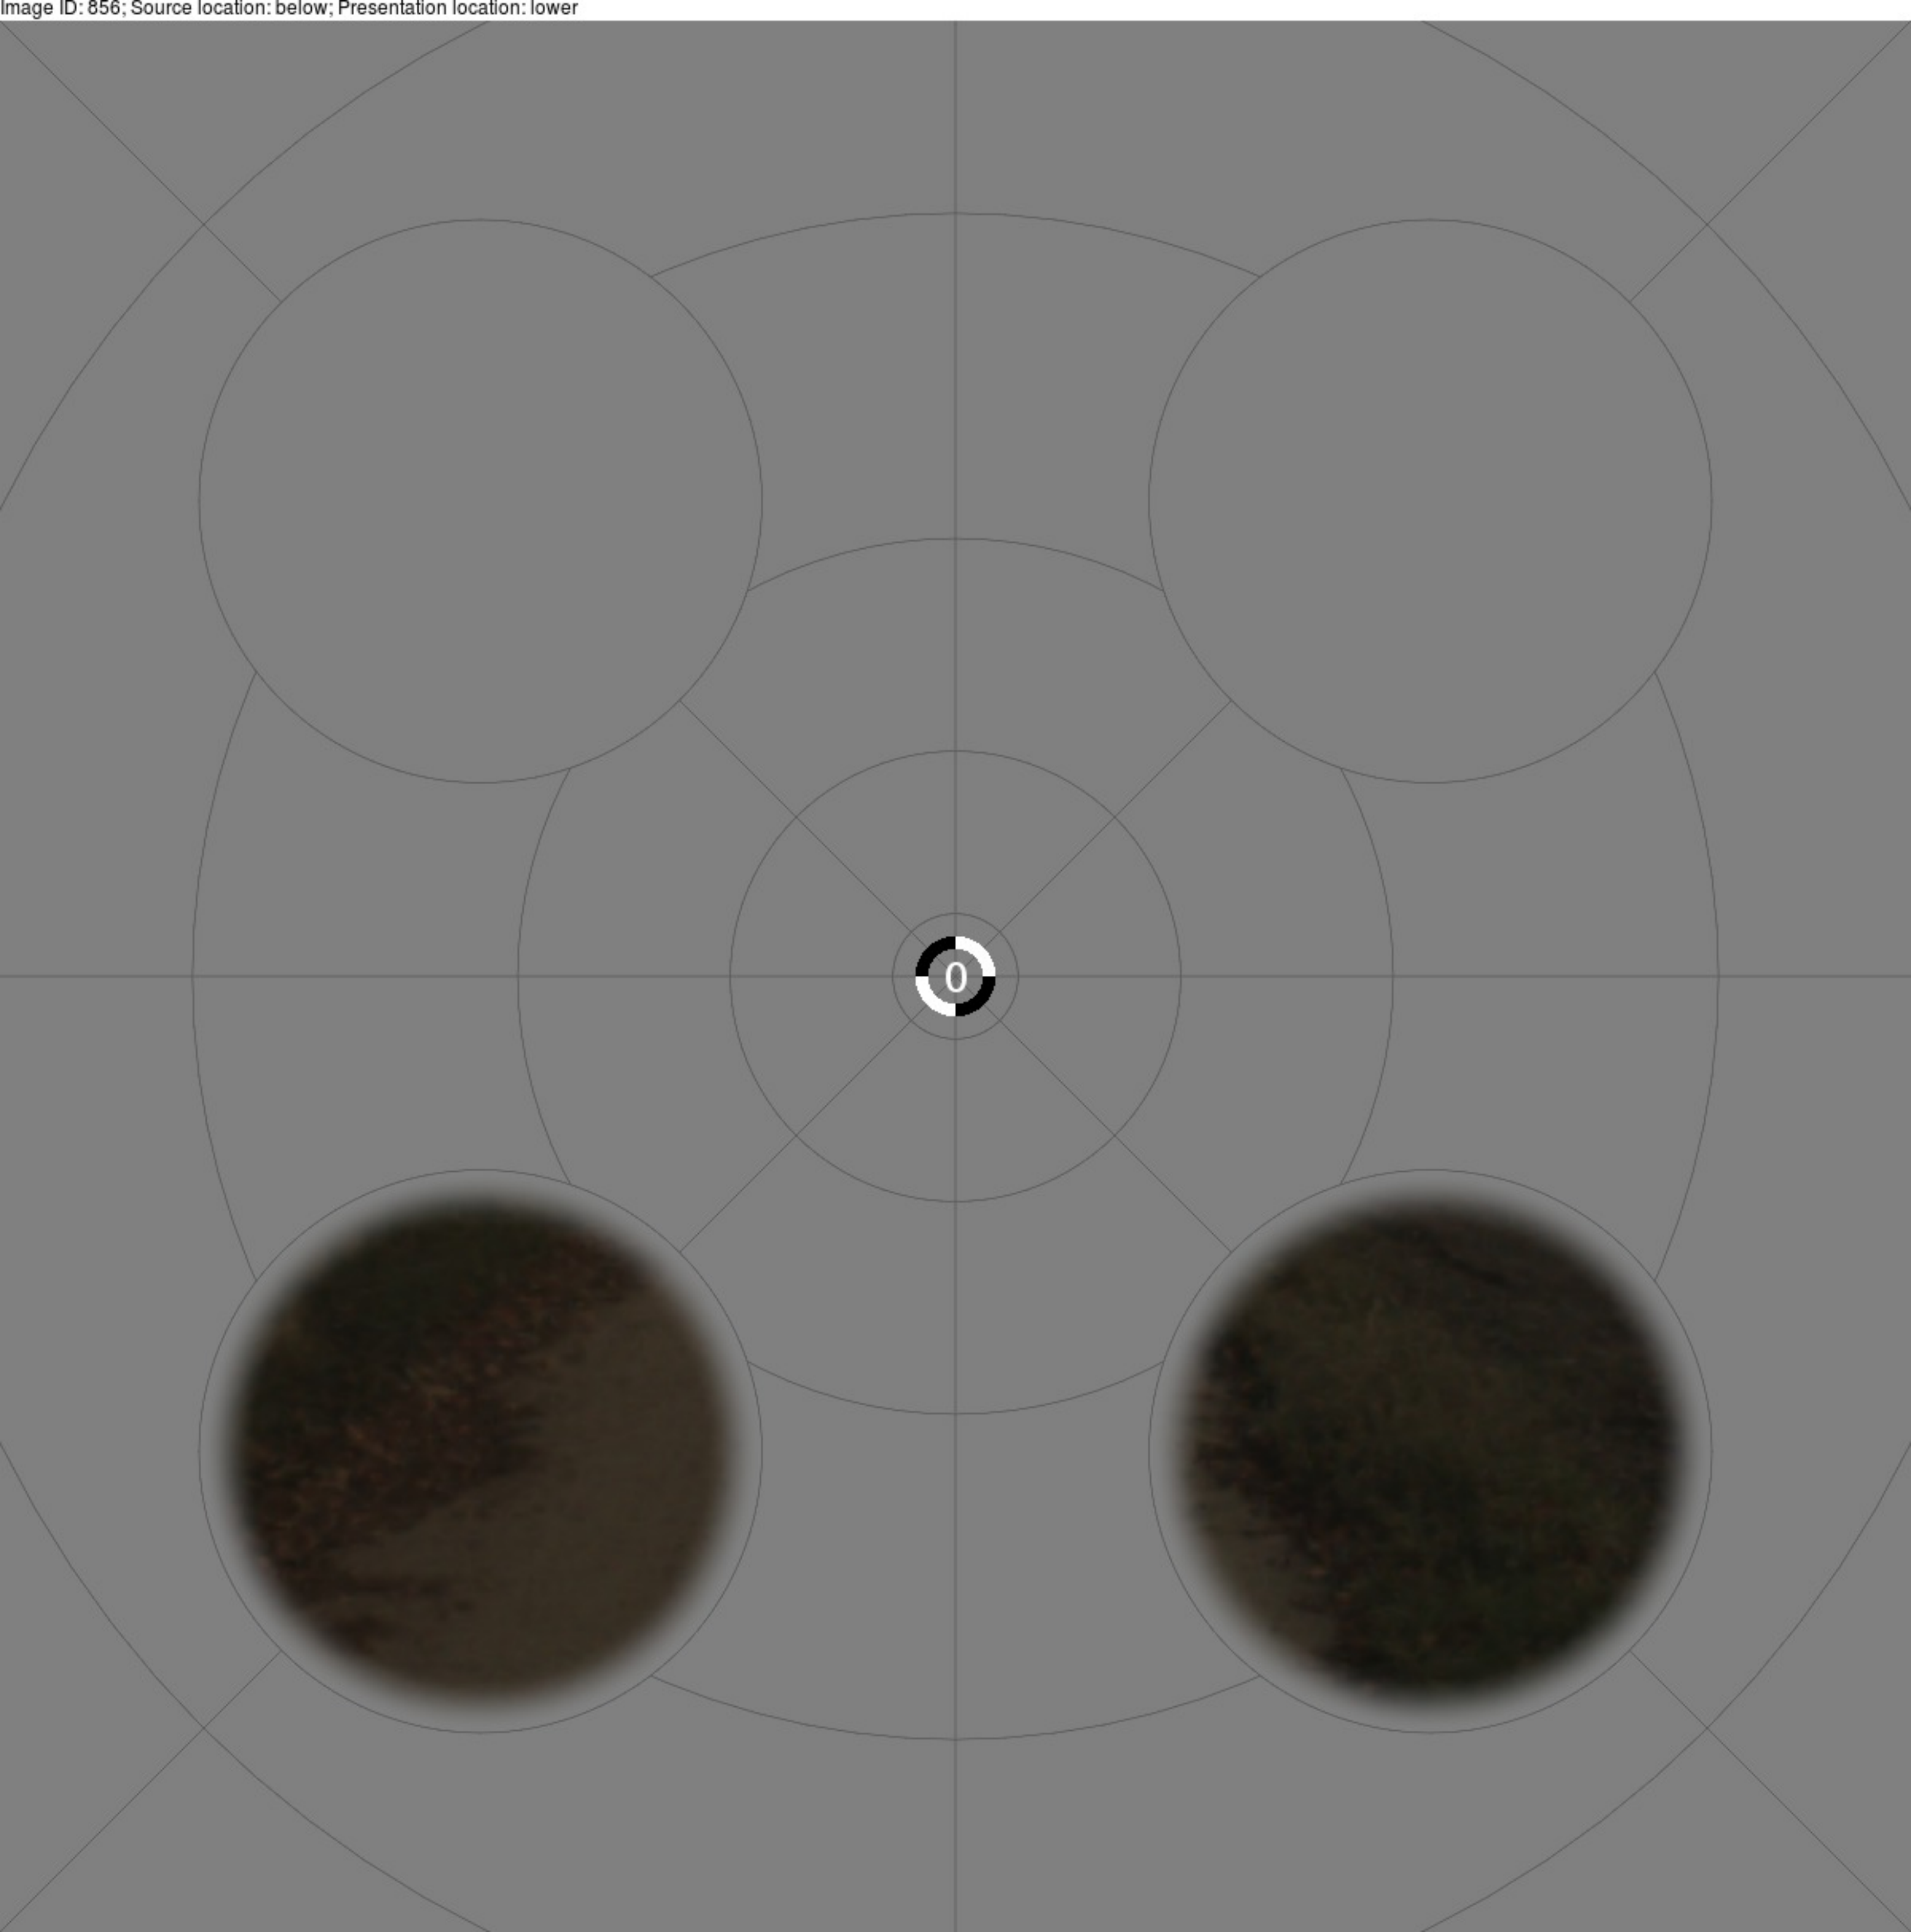



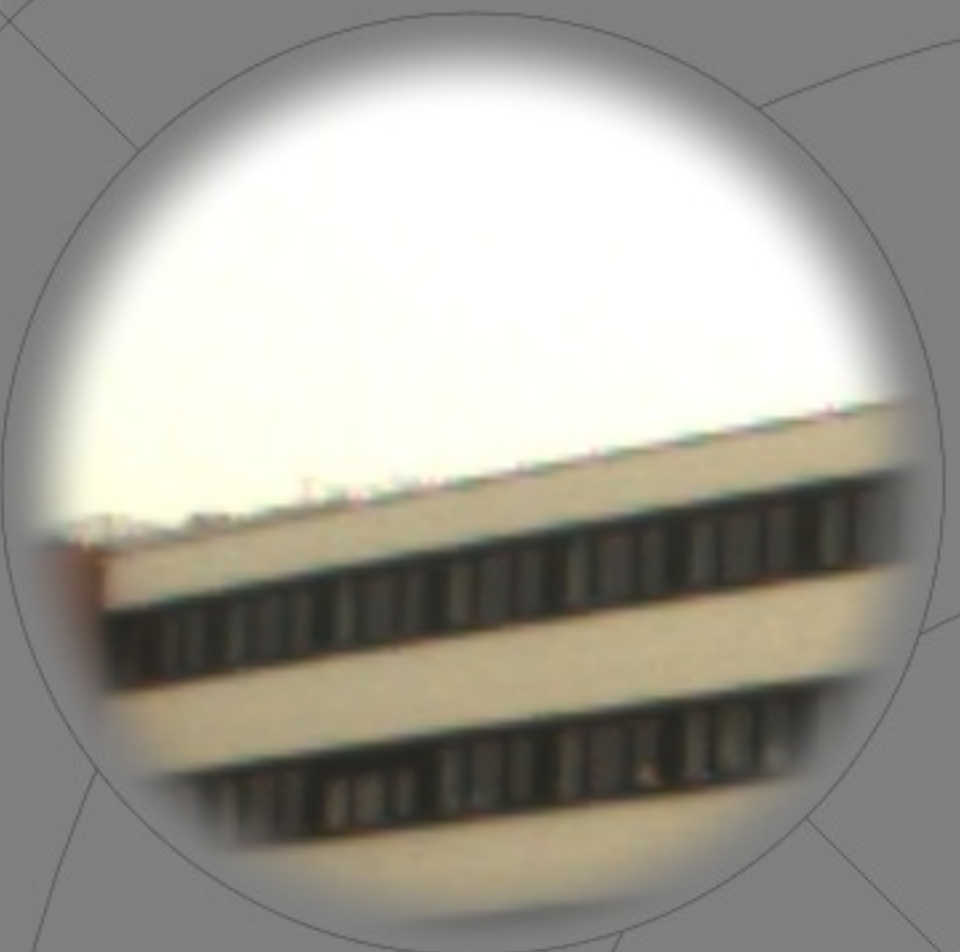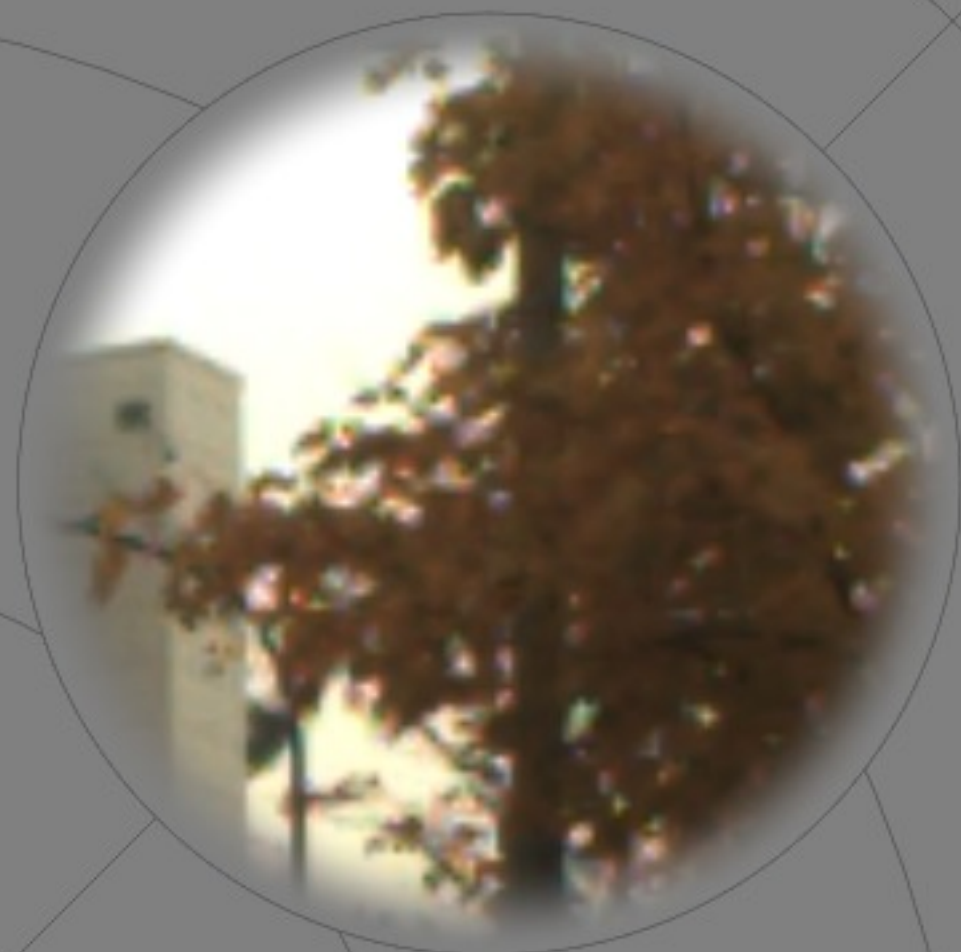

0

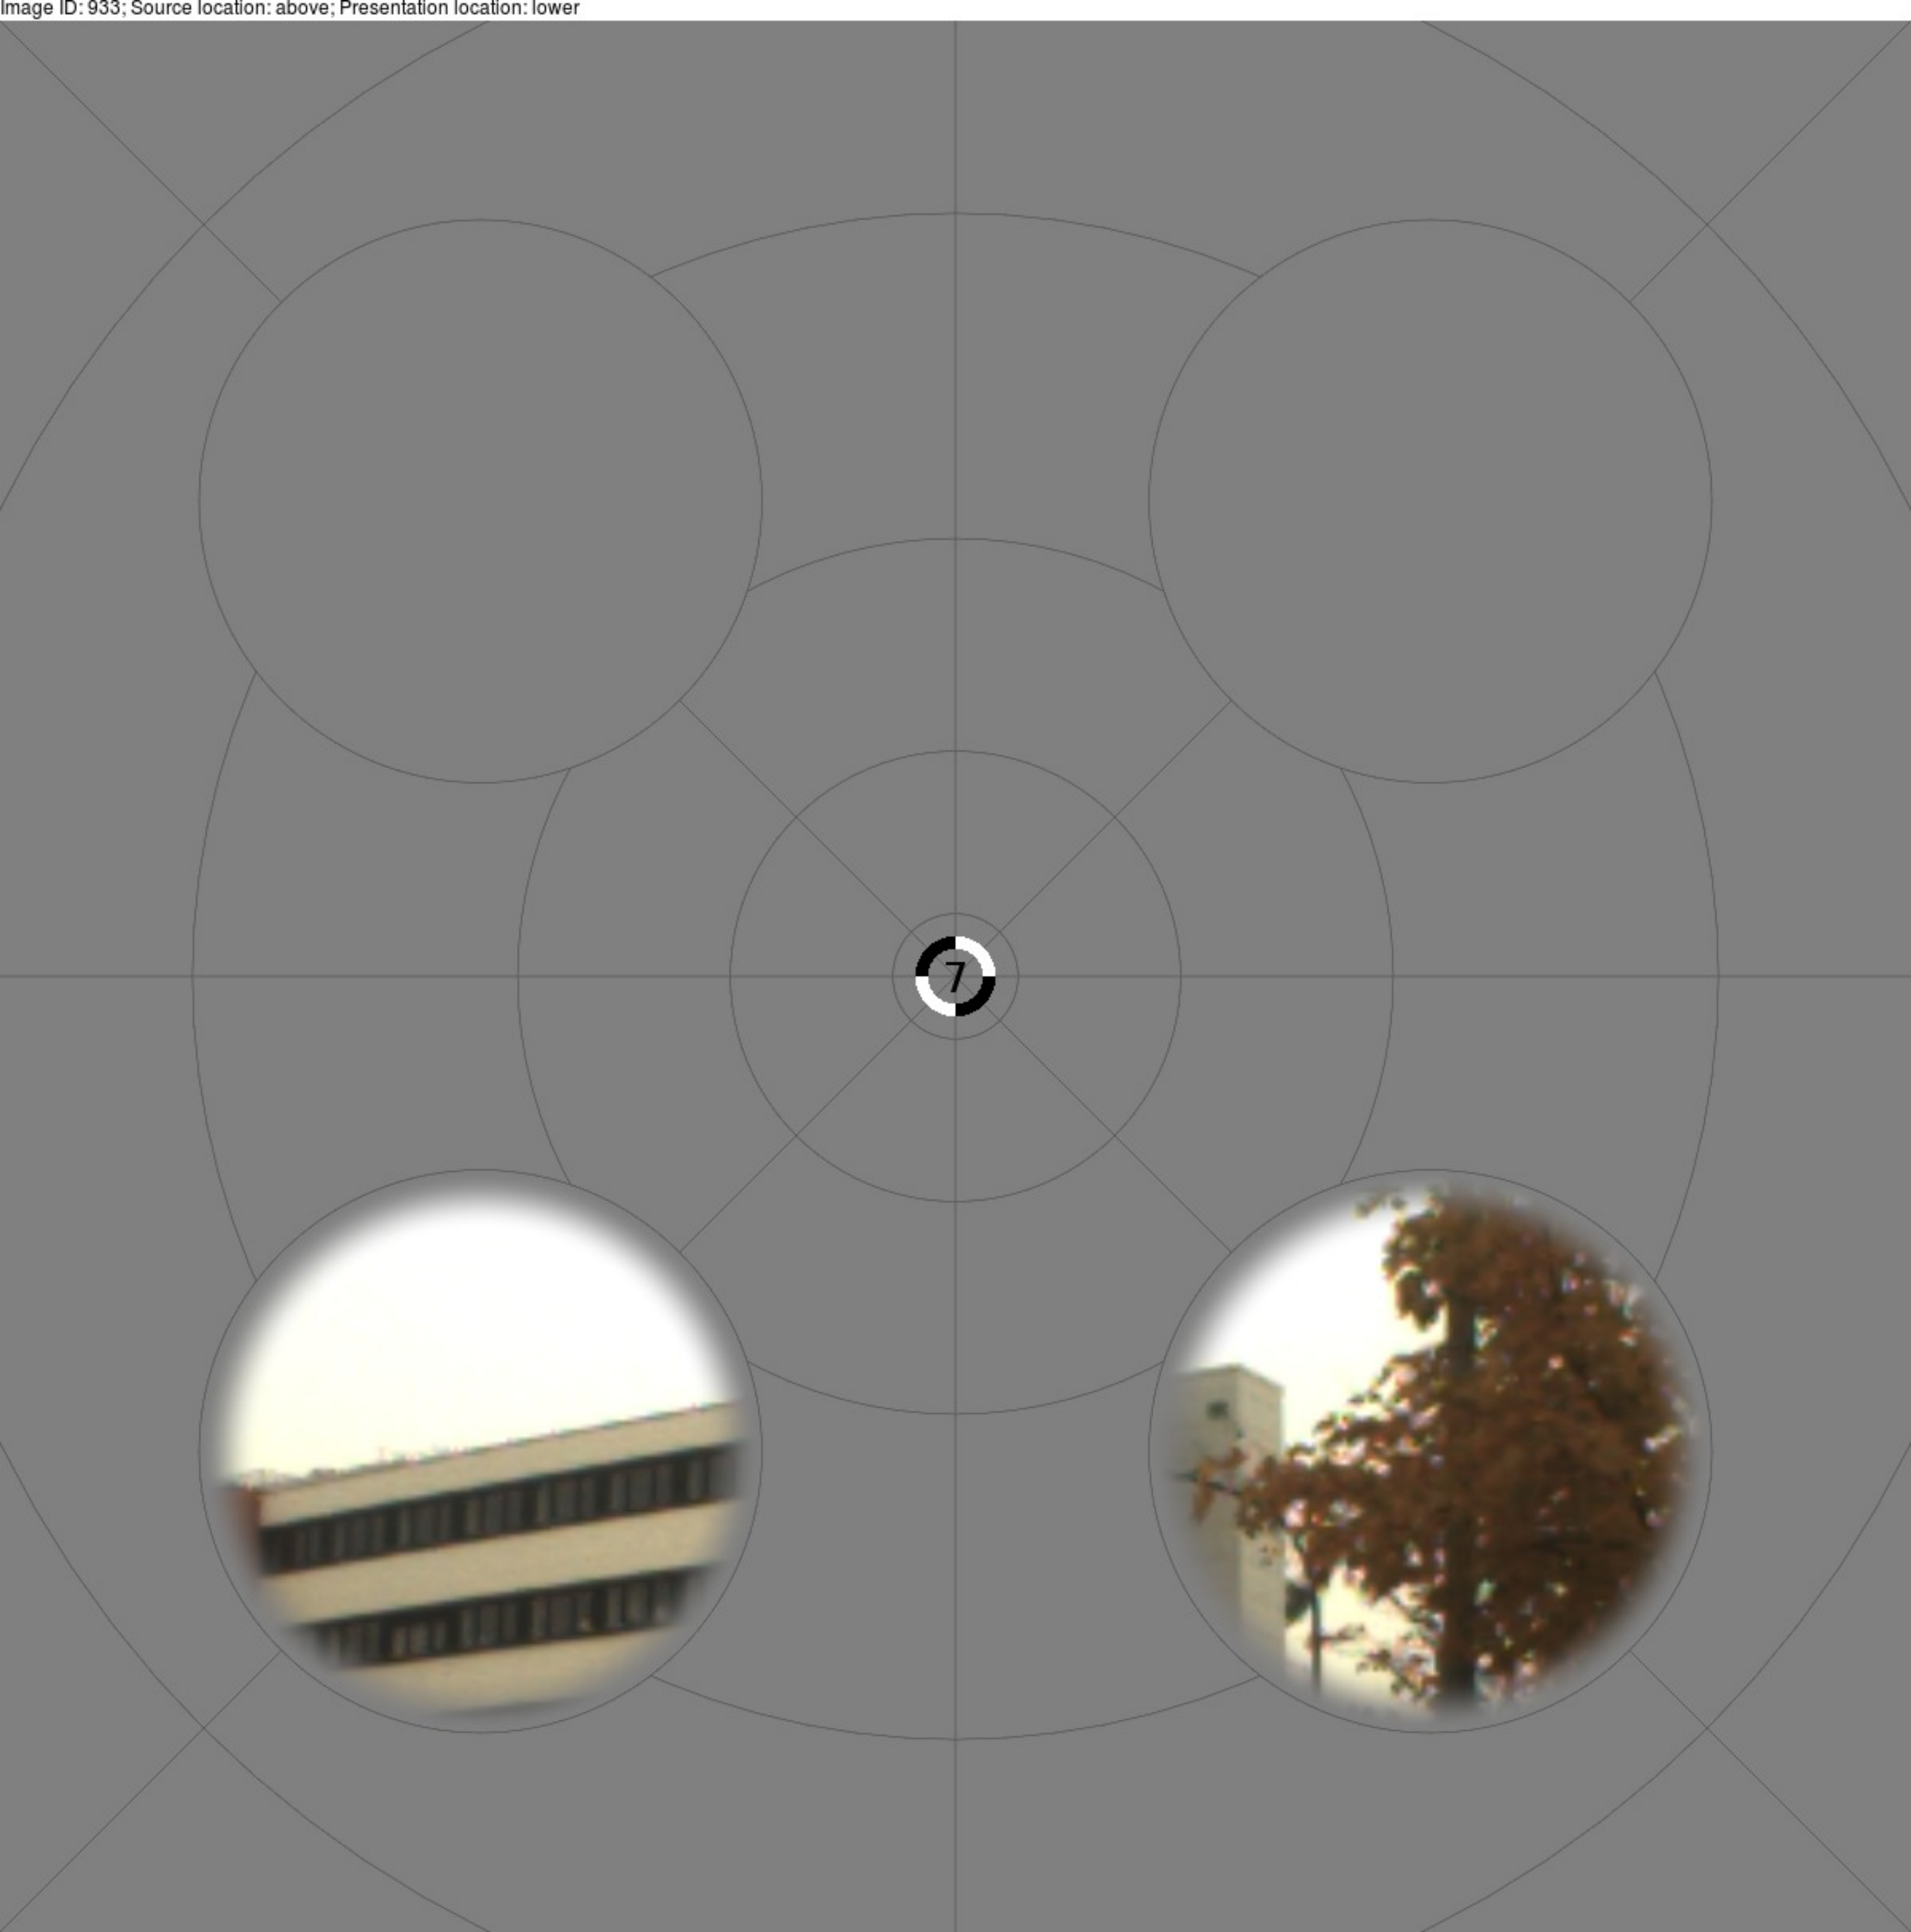

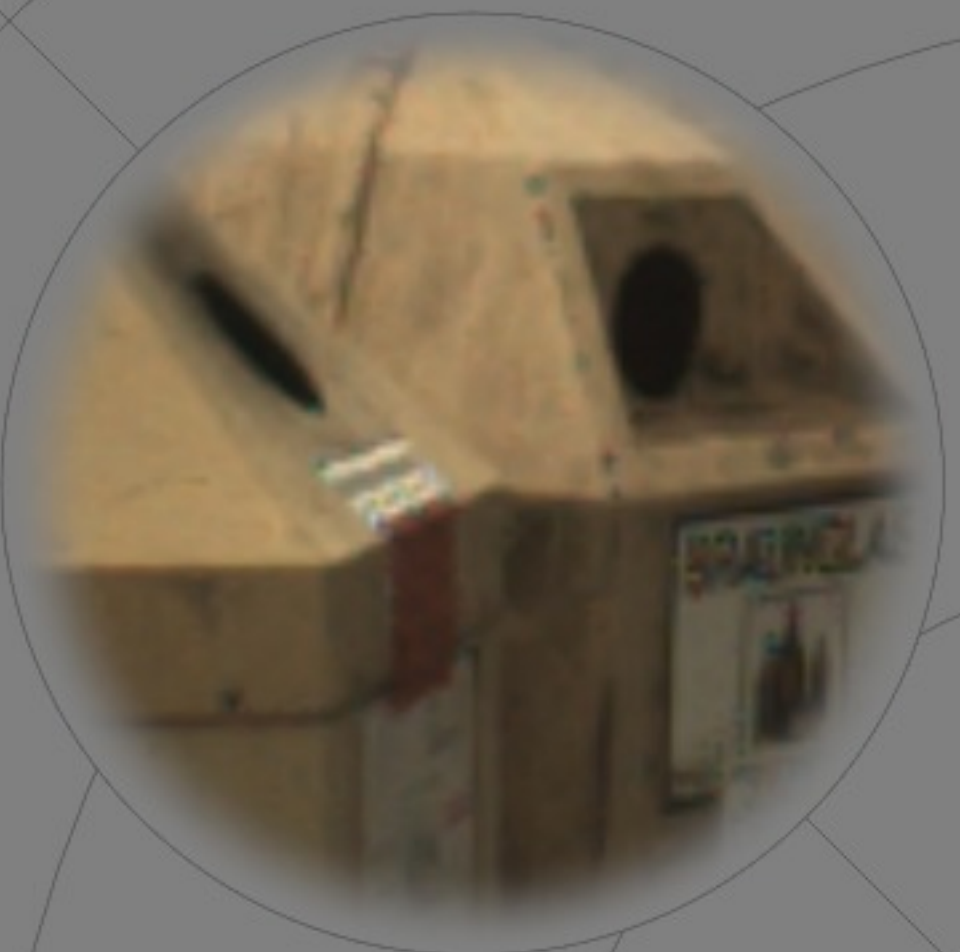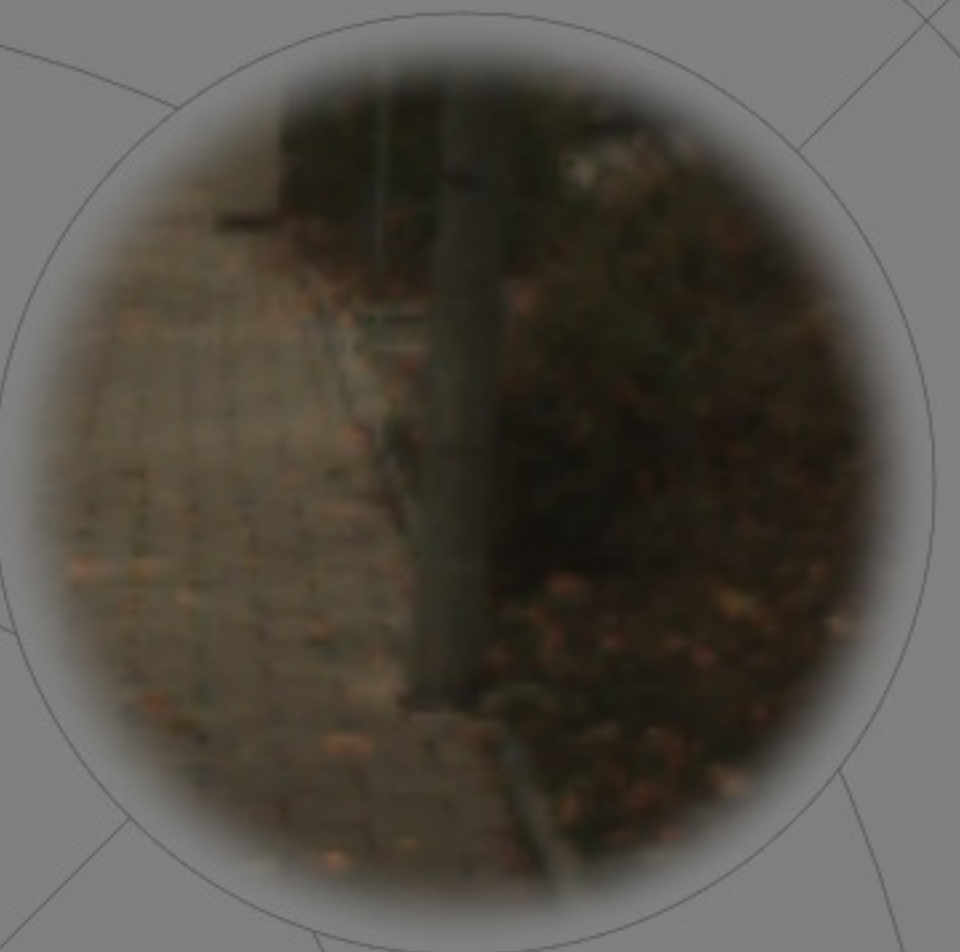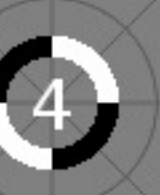



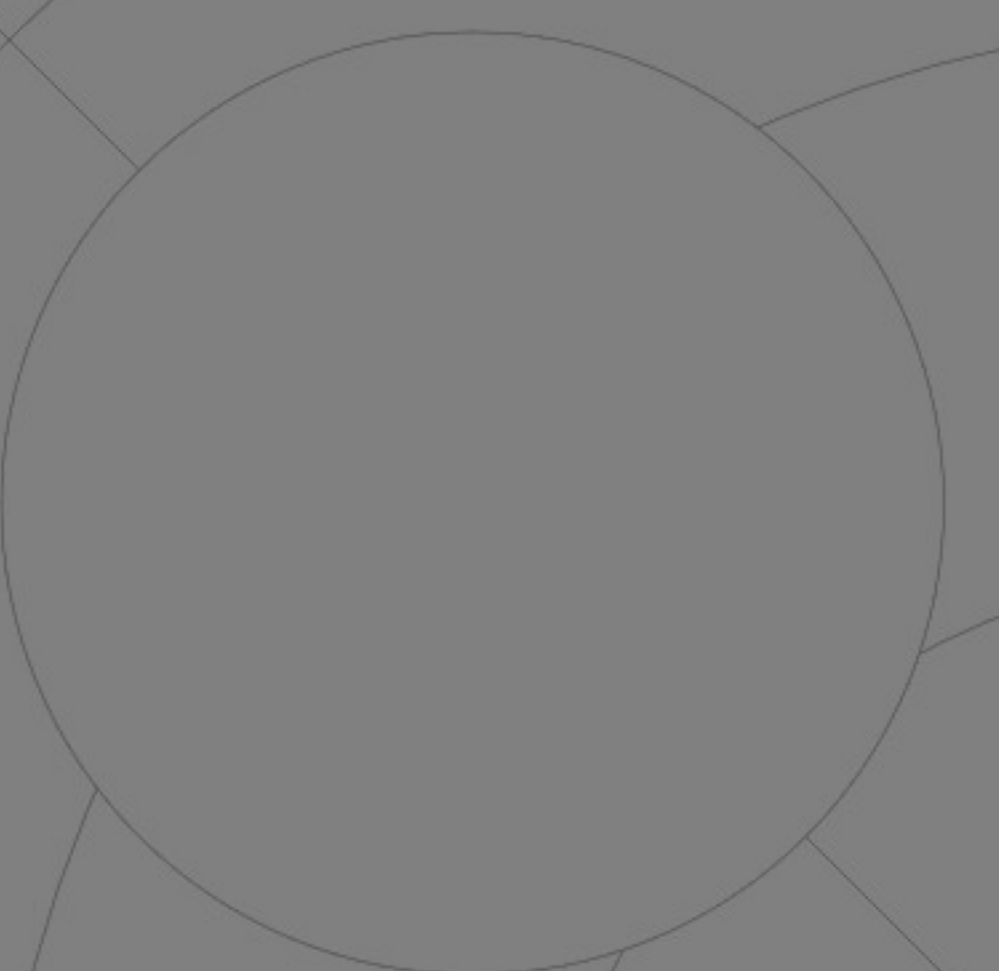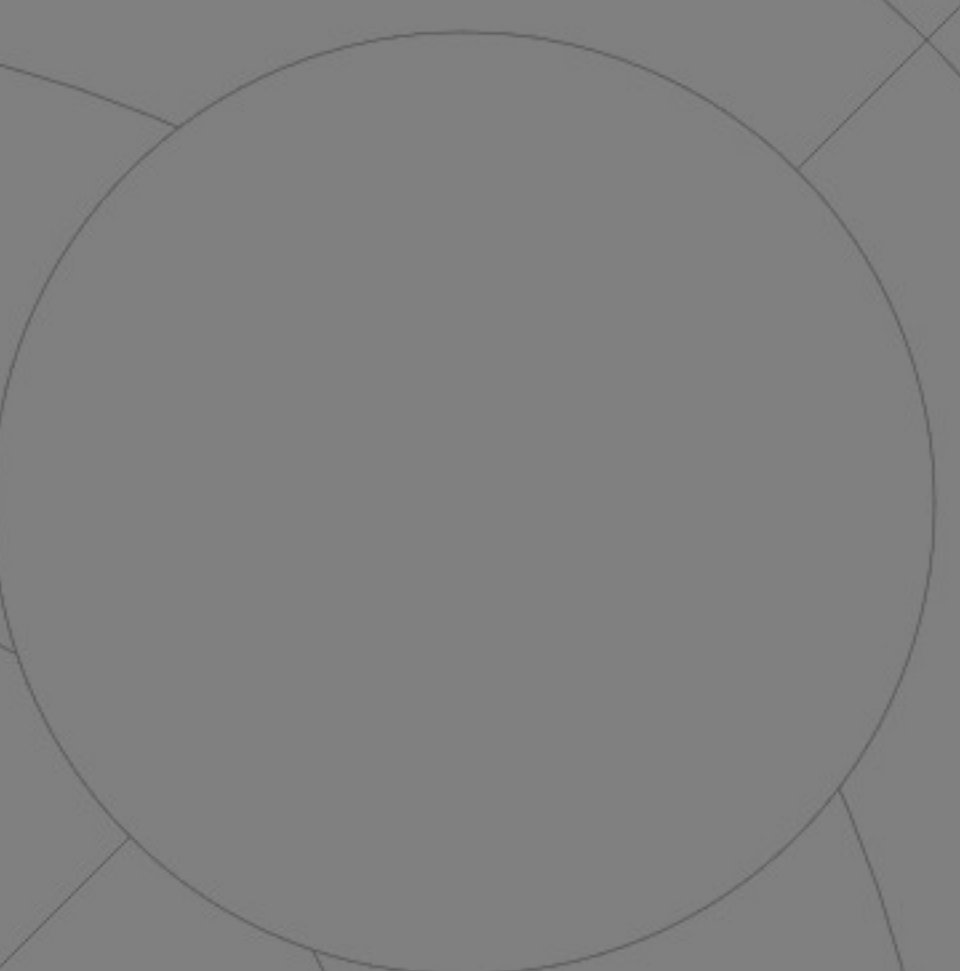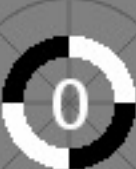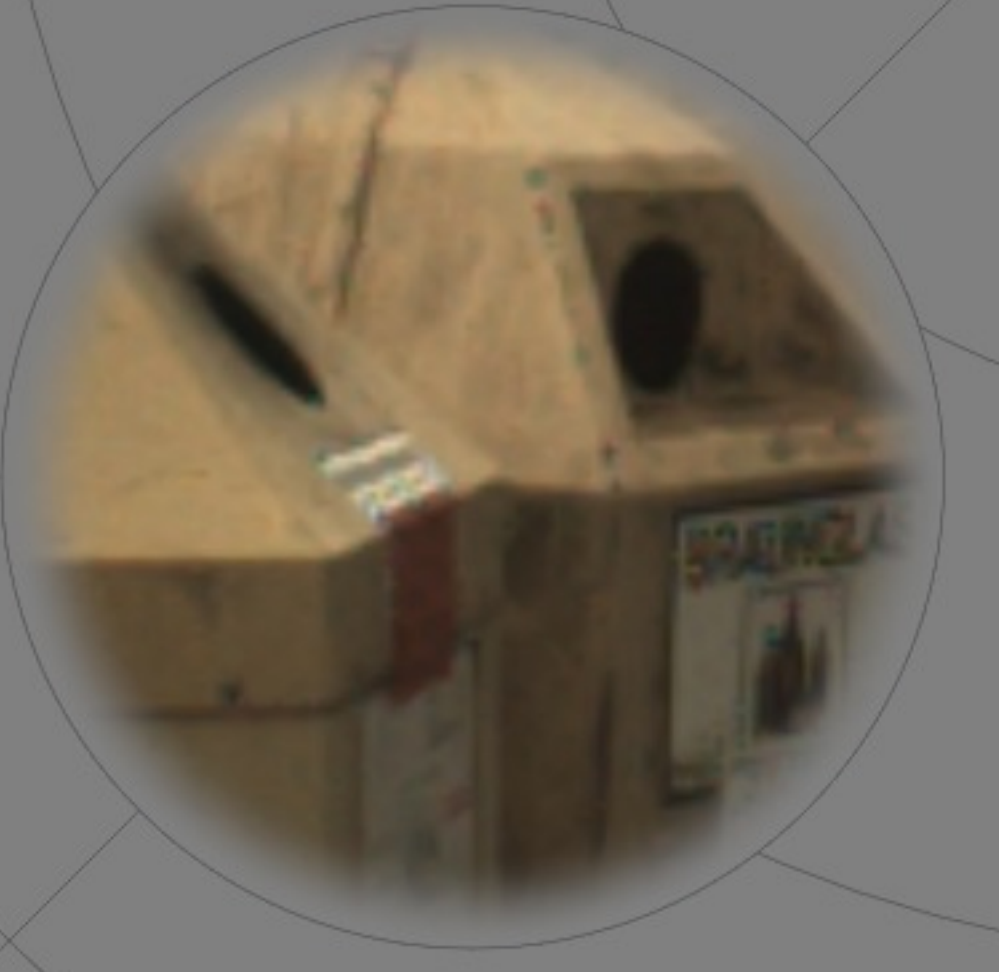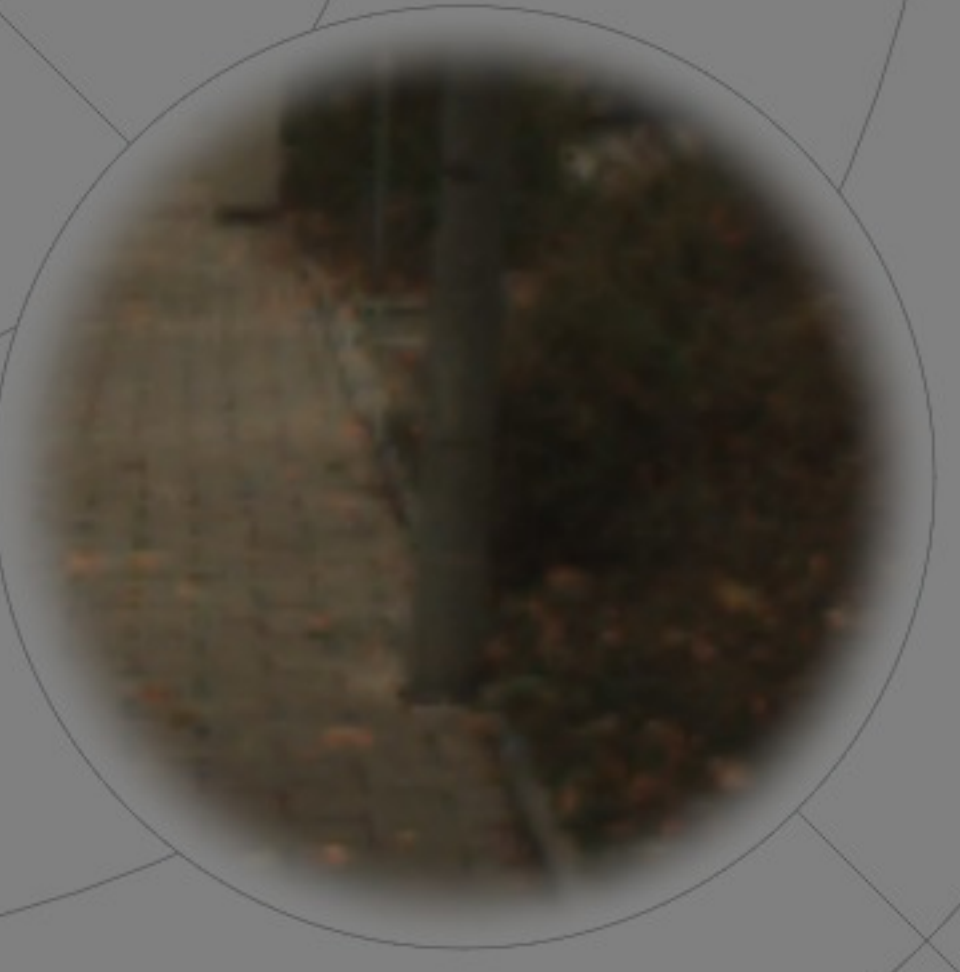

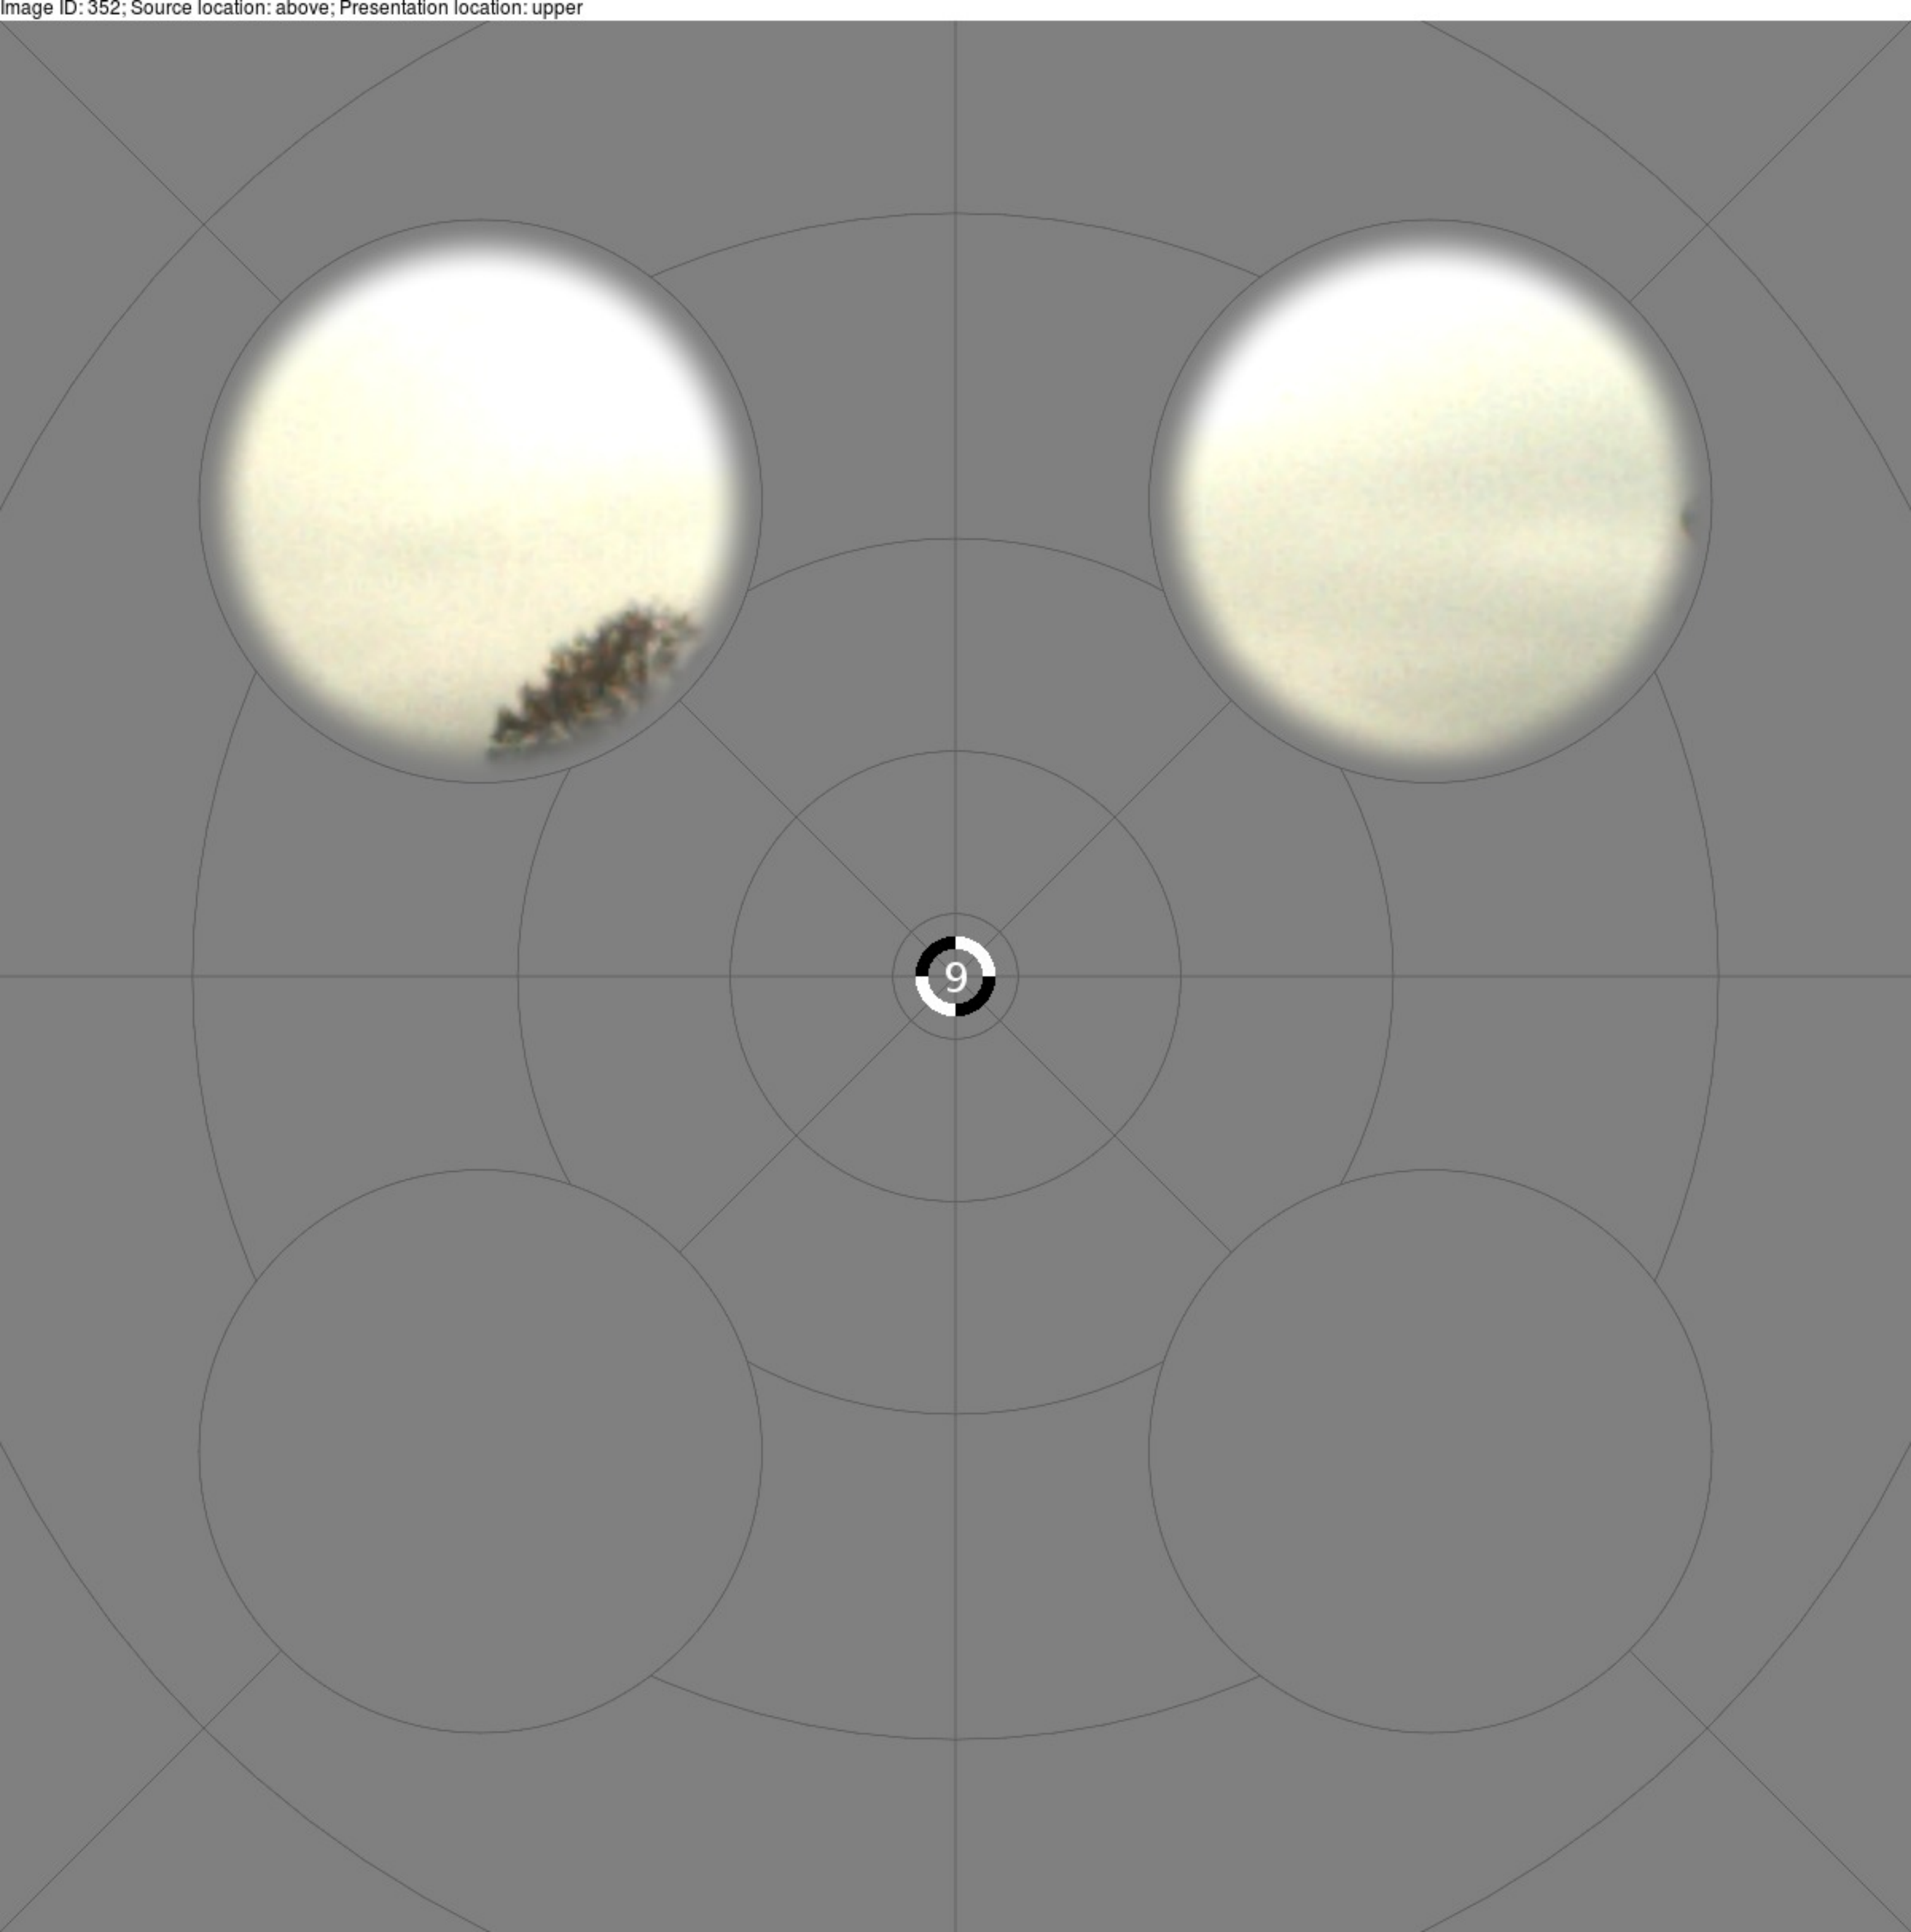

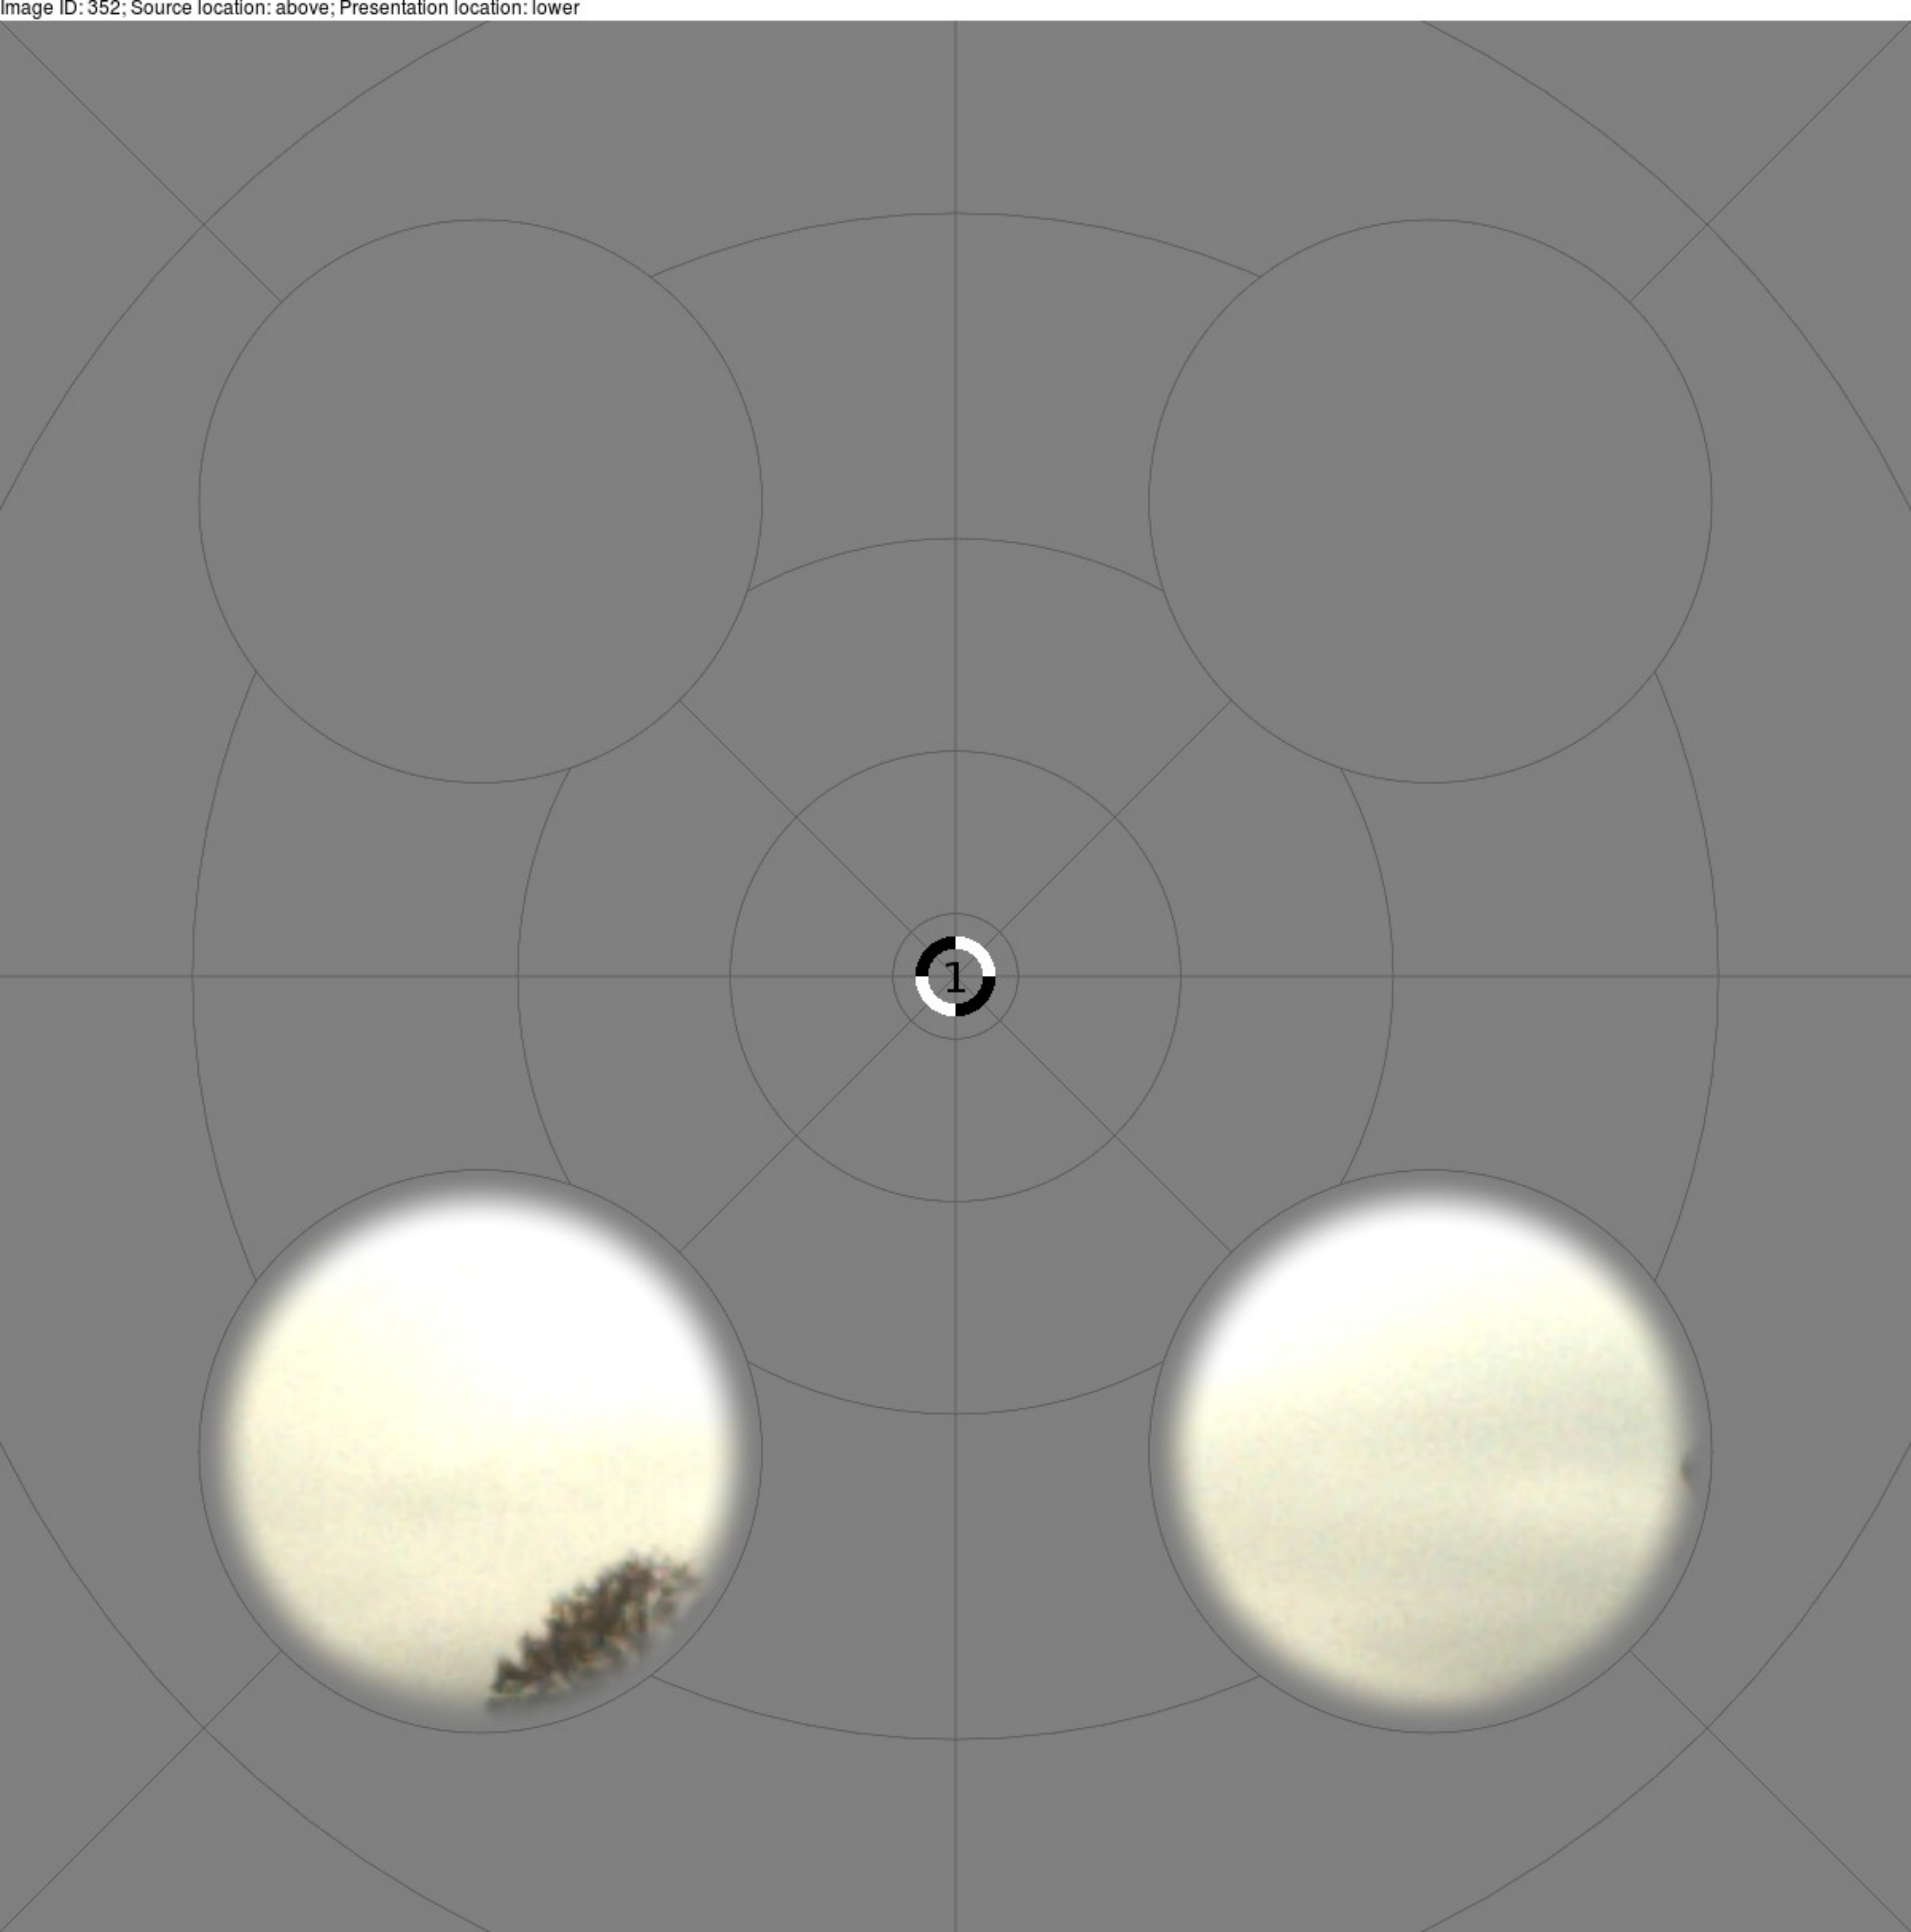



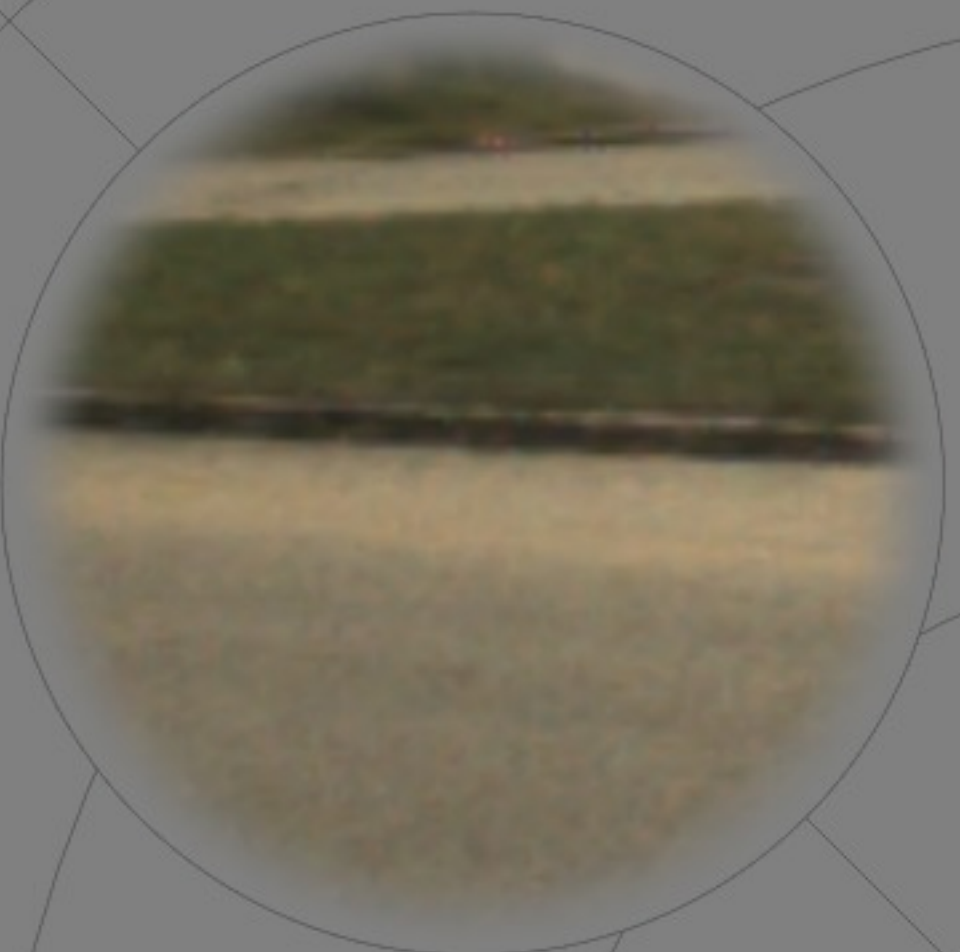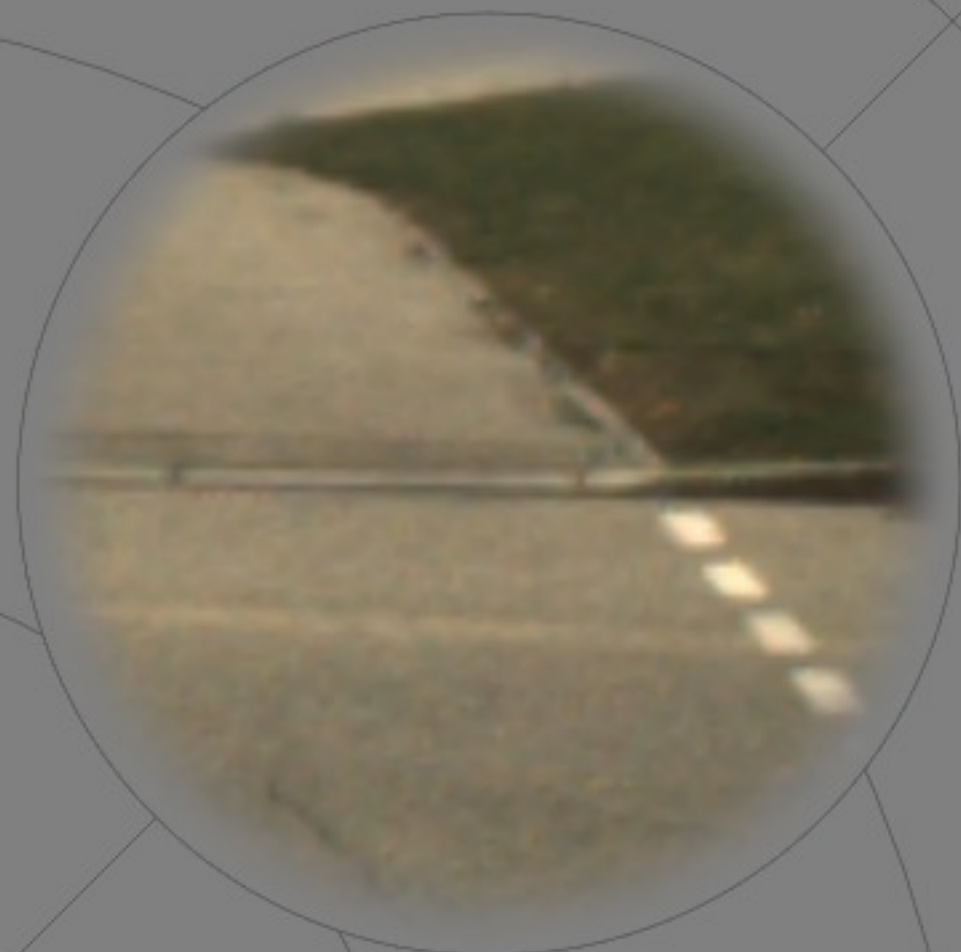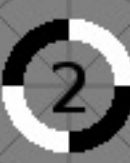

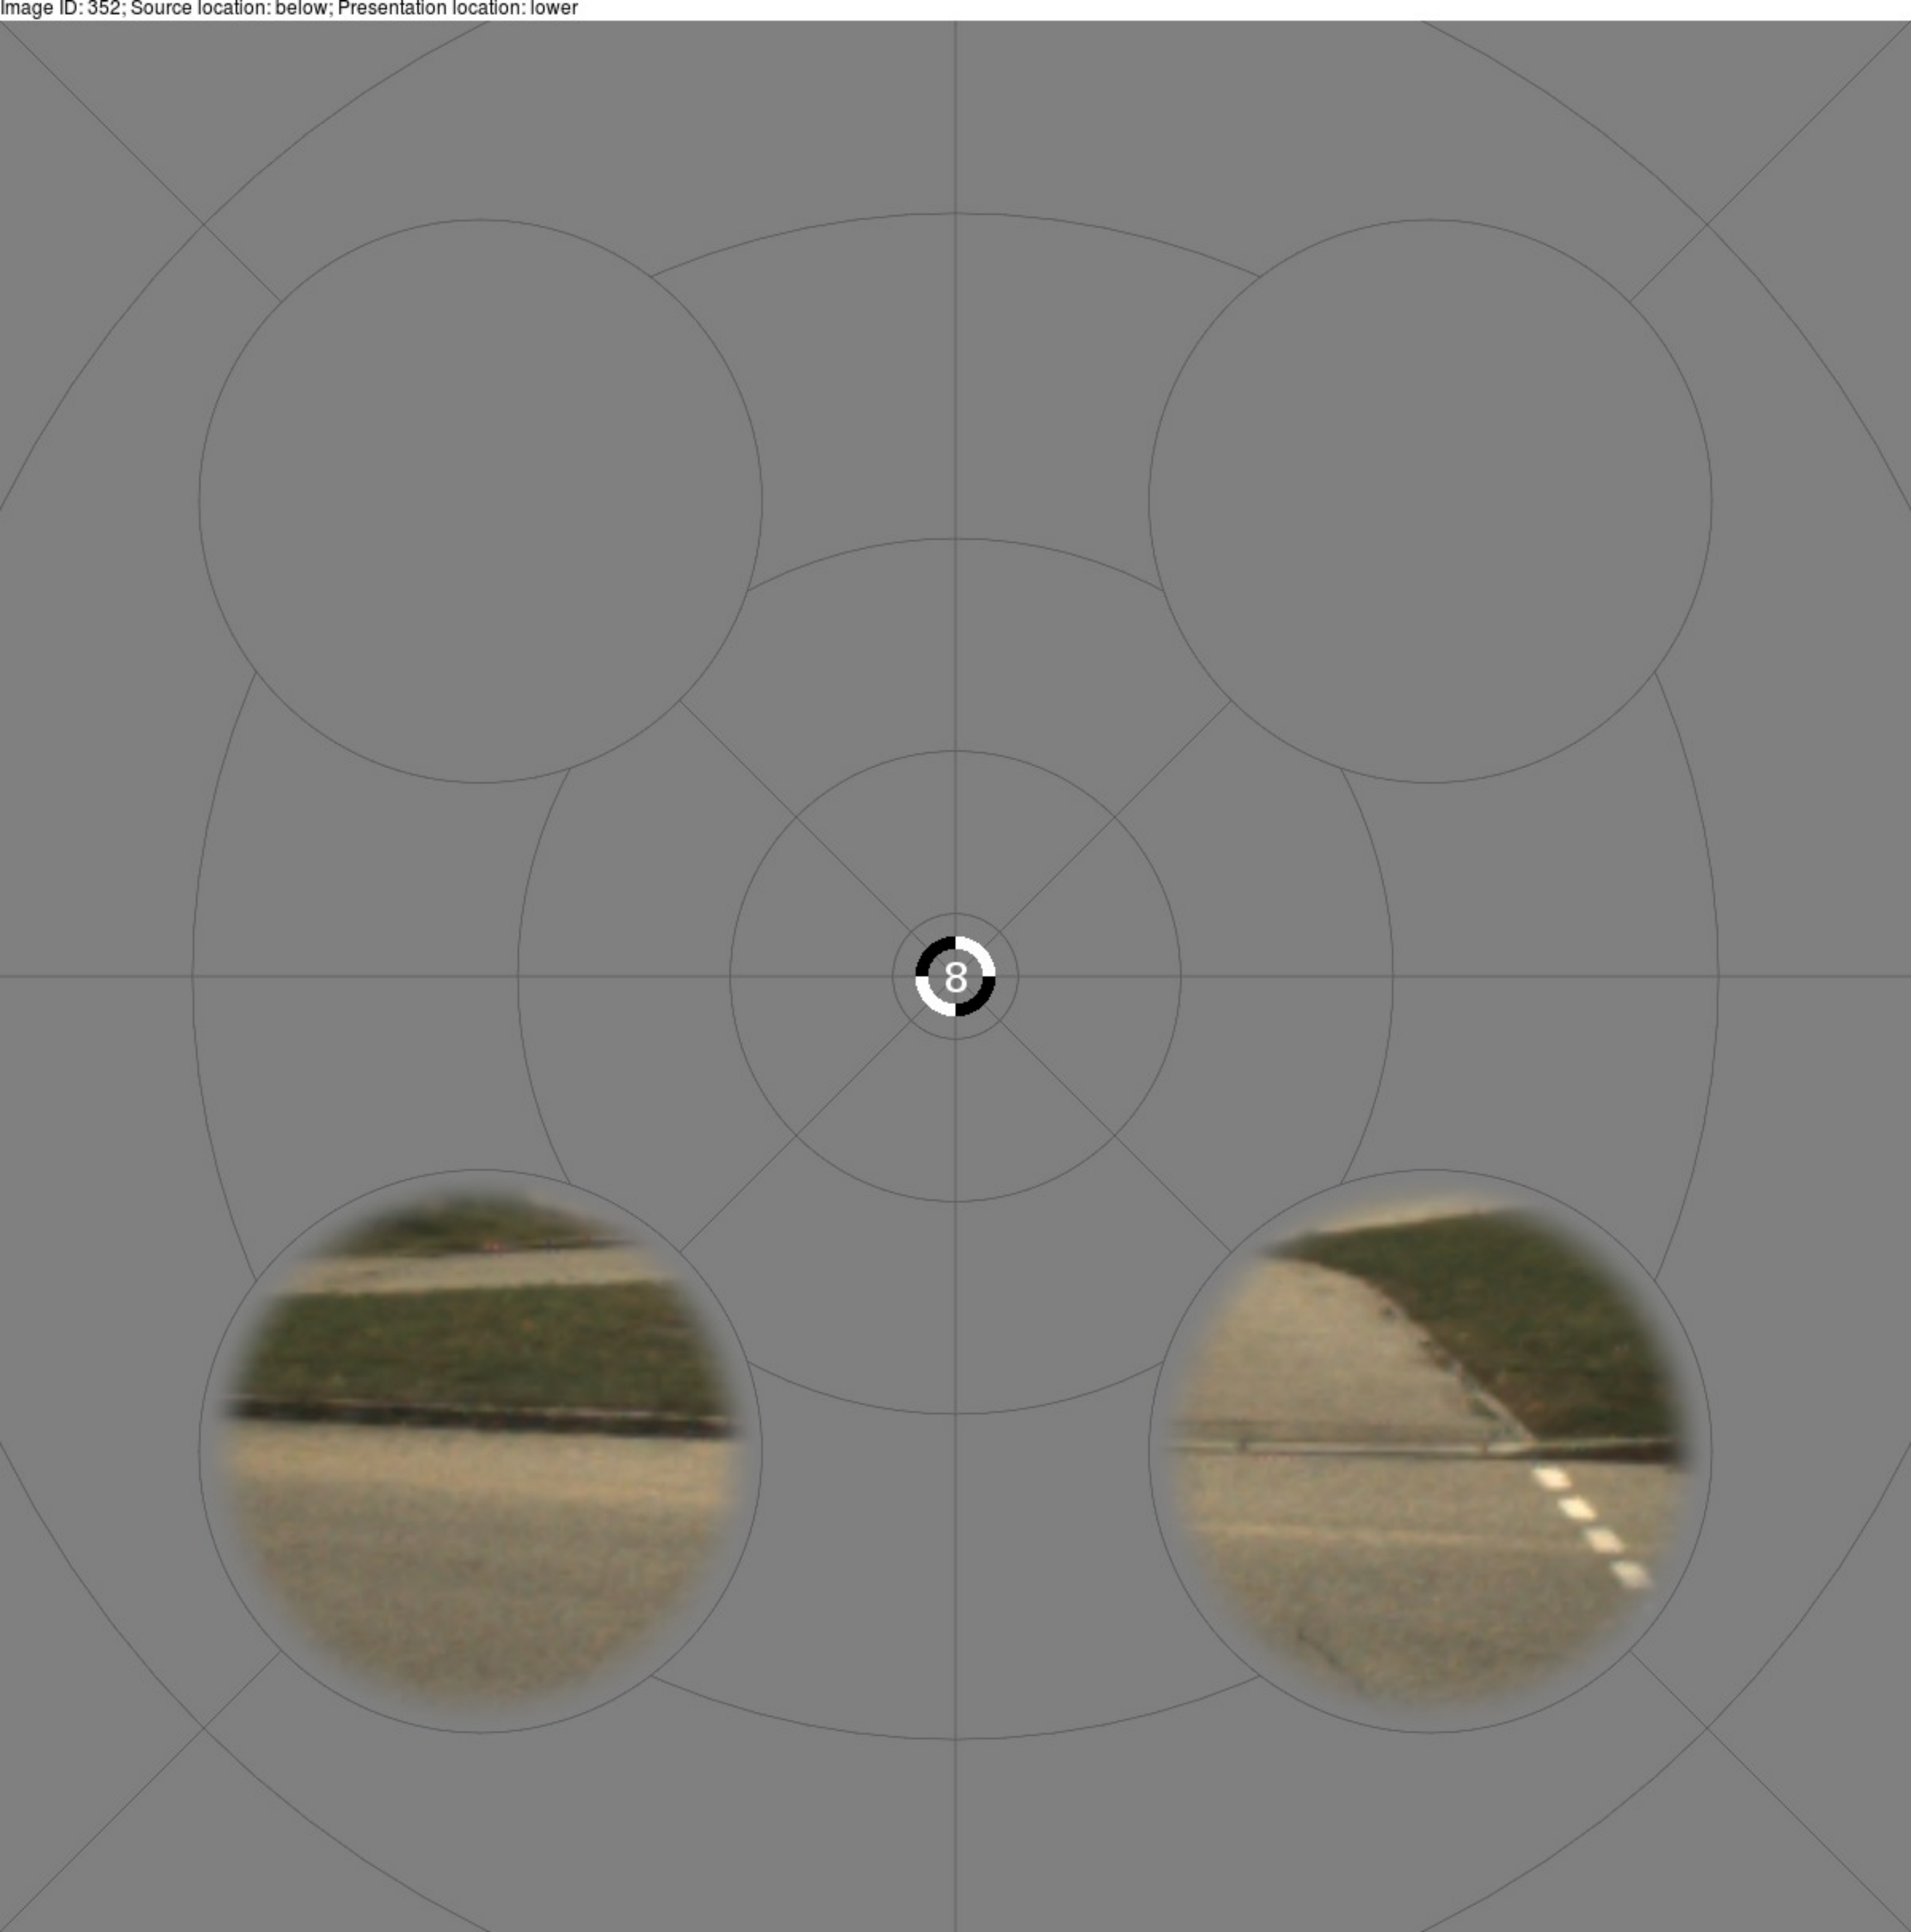

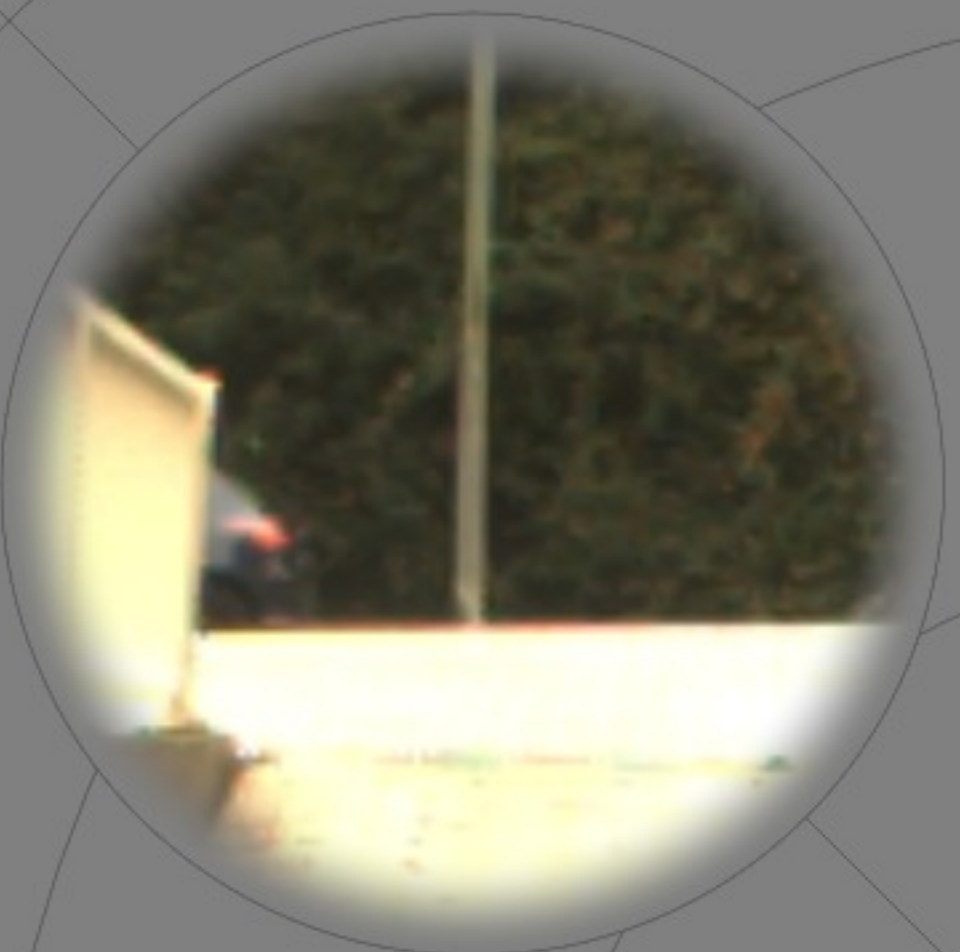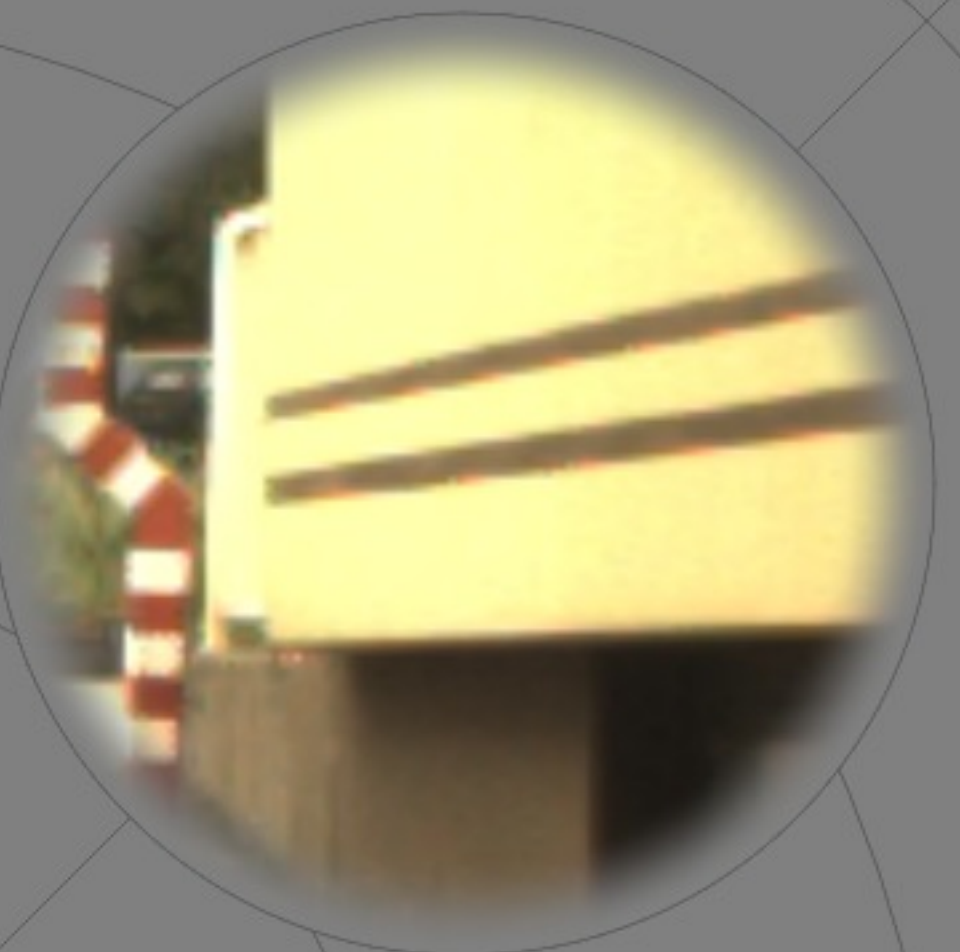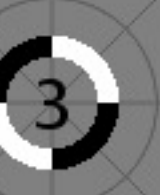



2

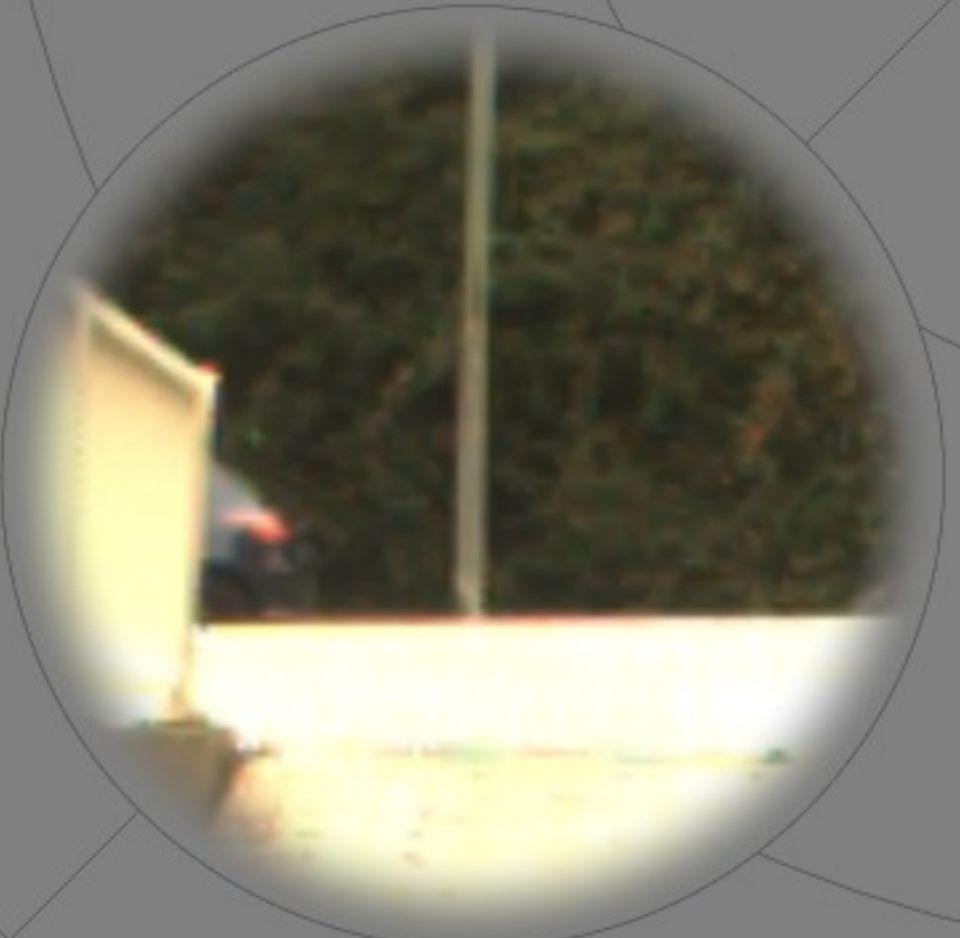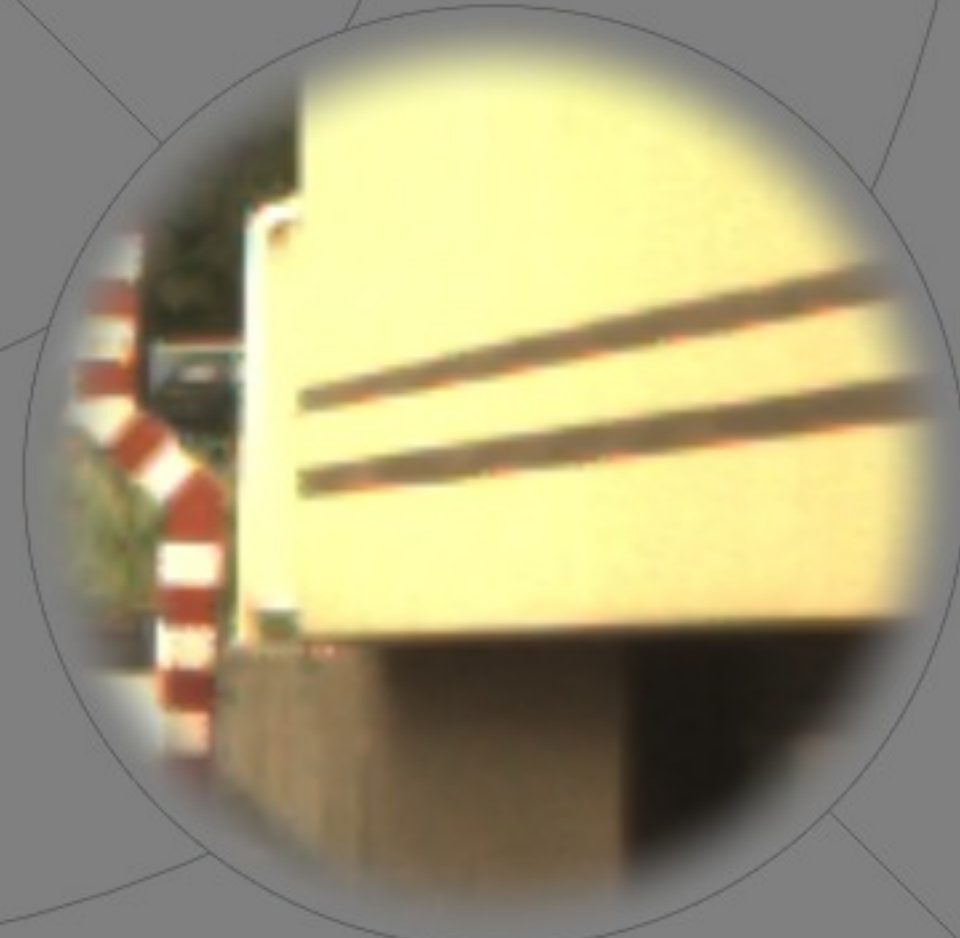

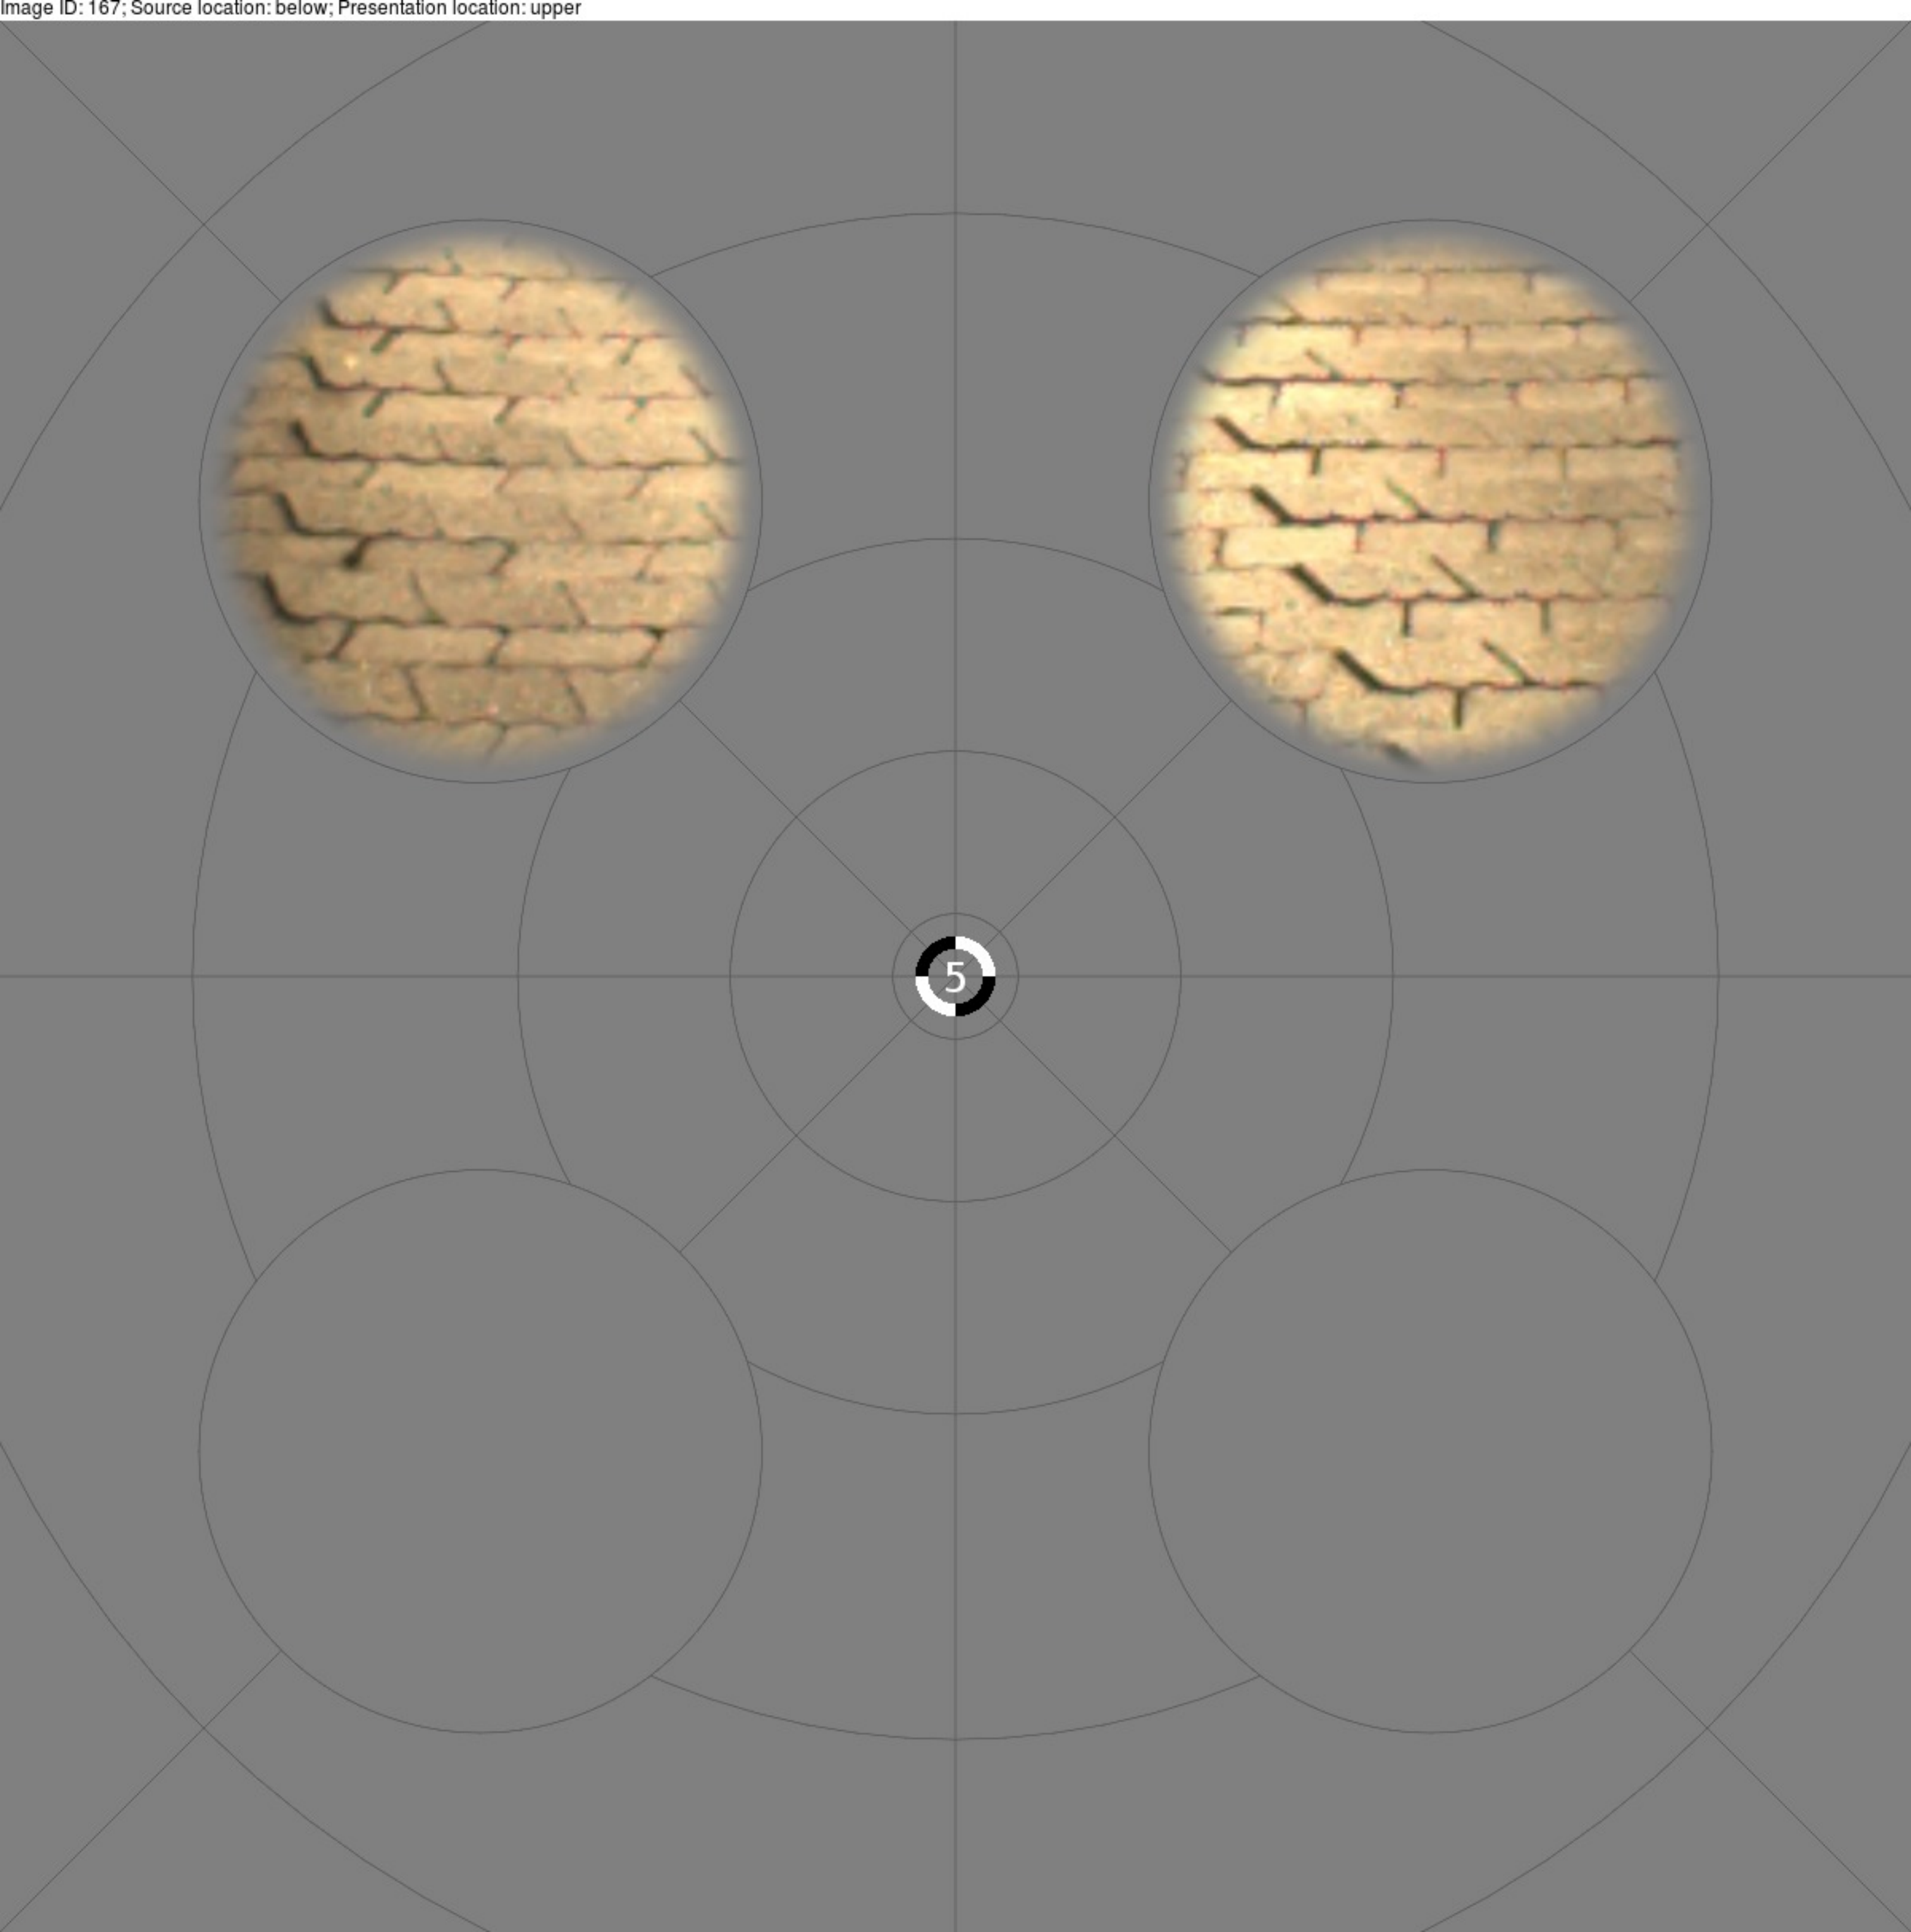



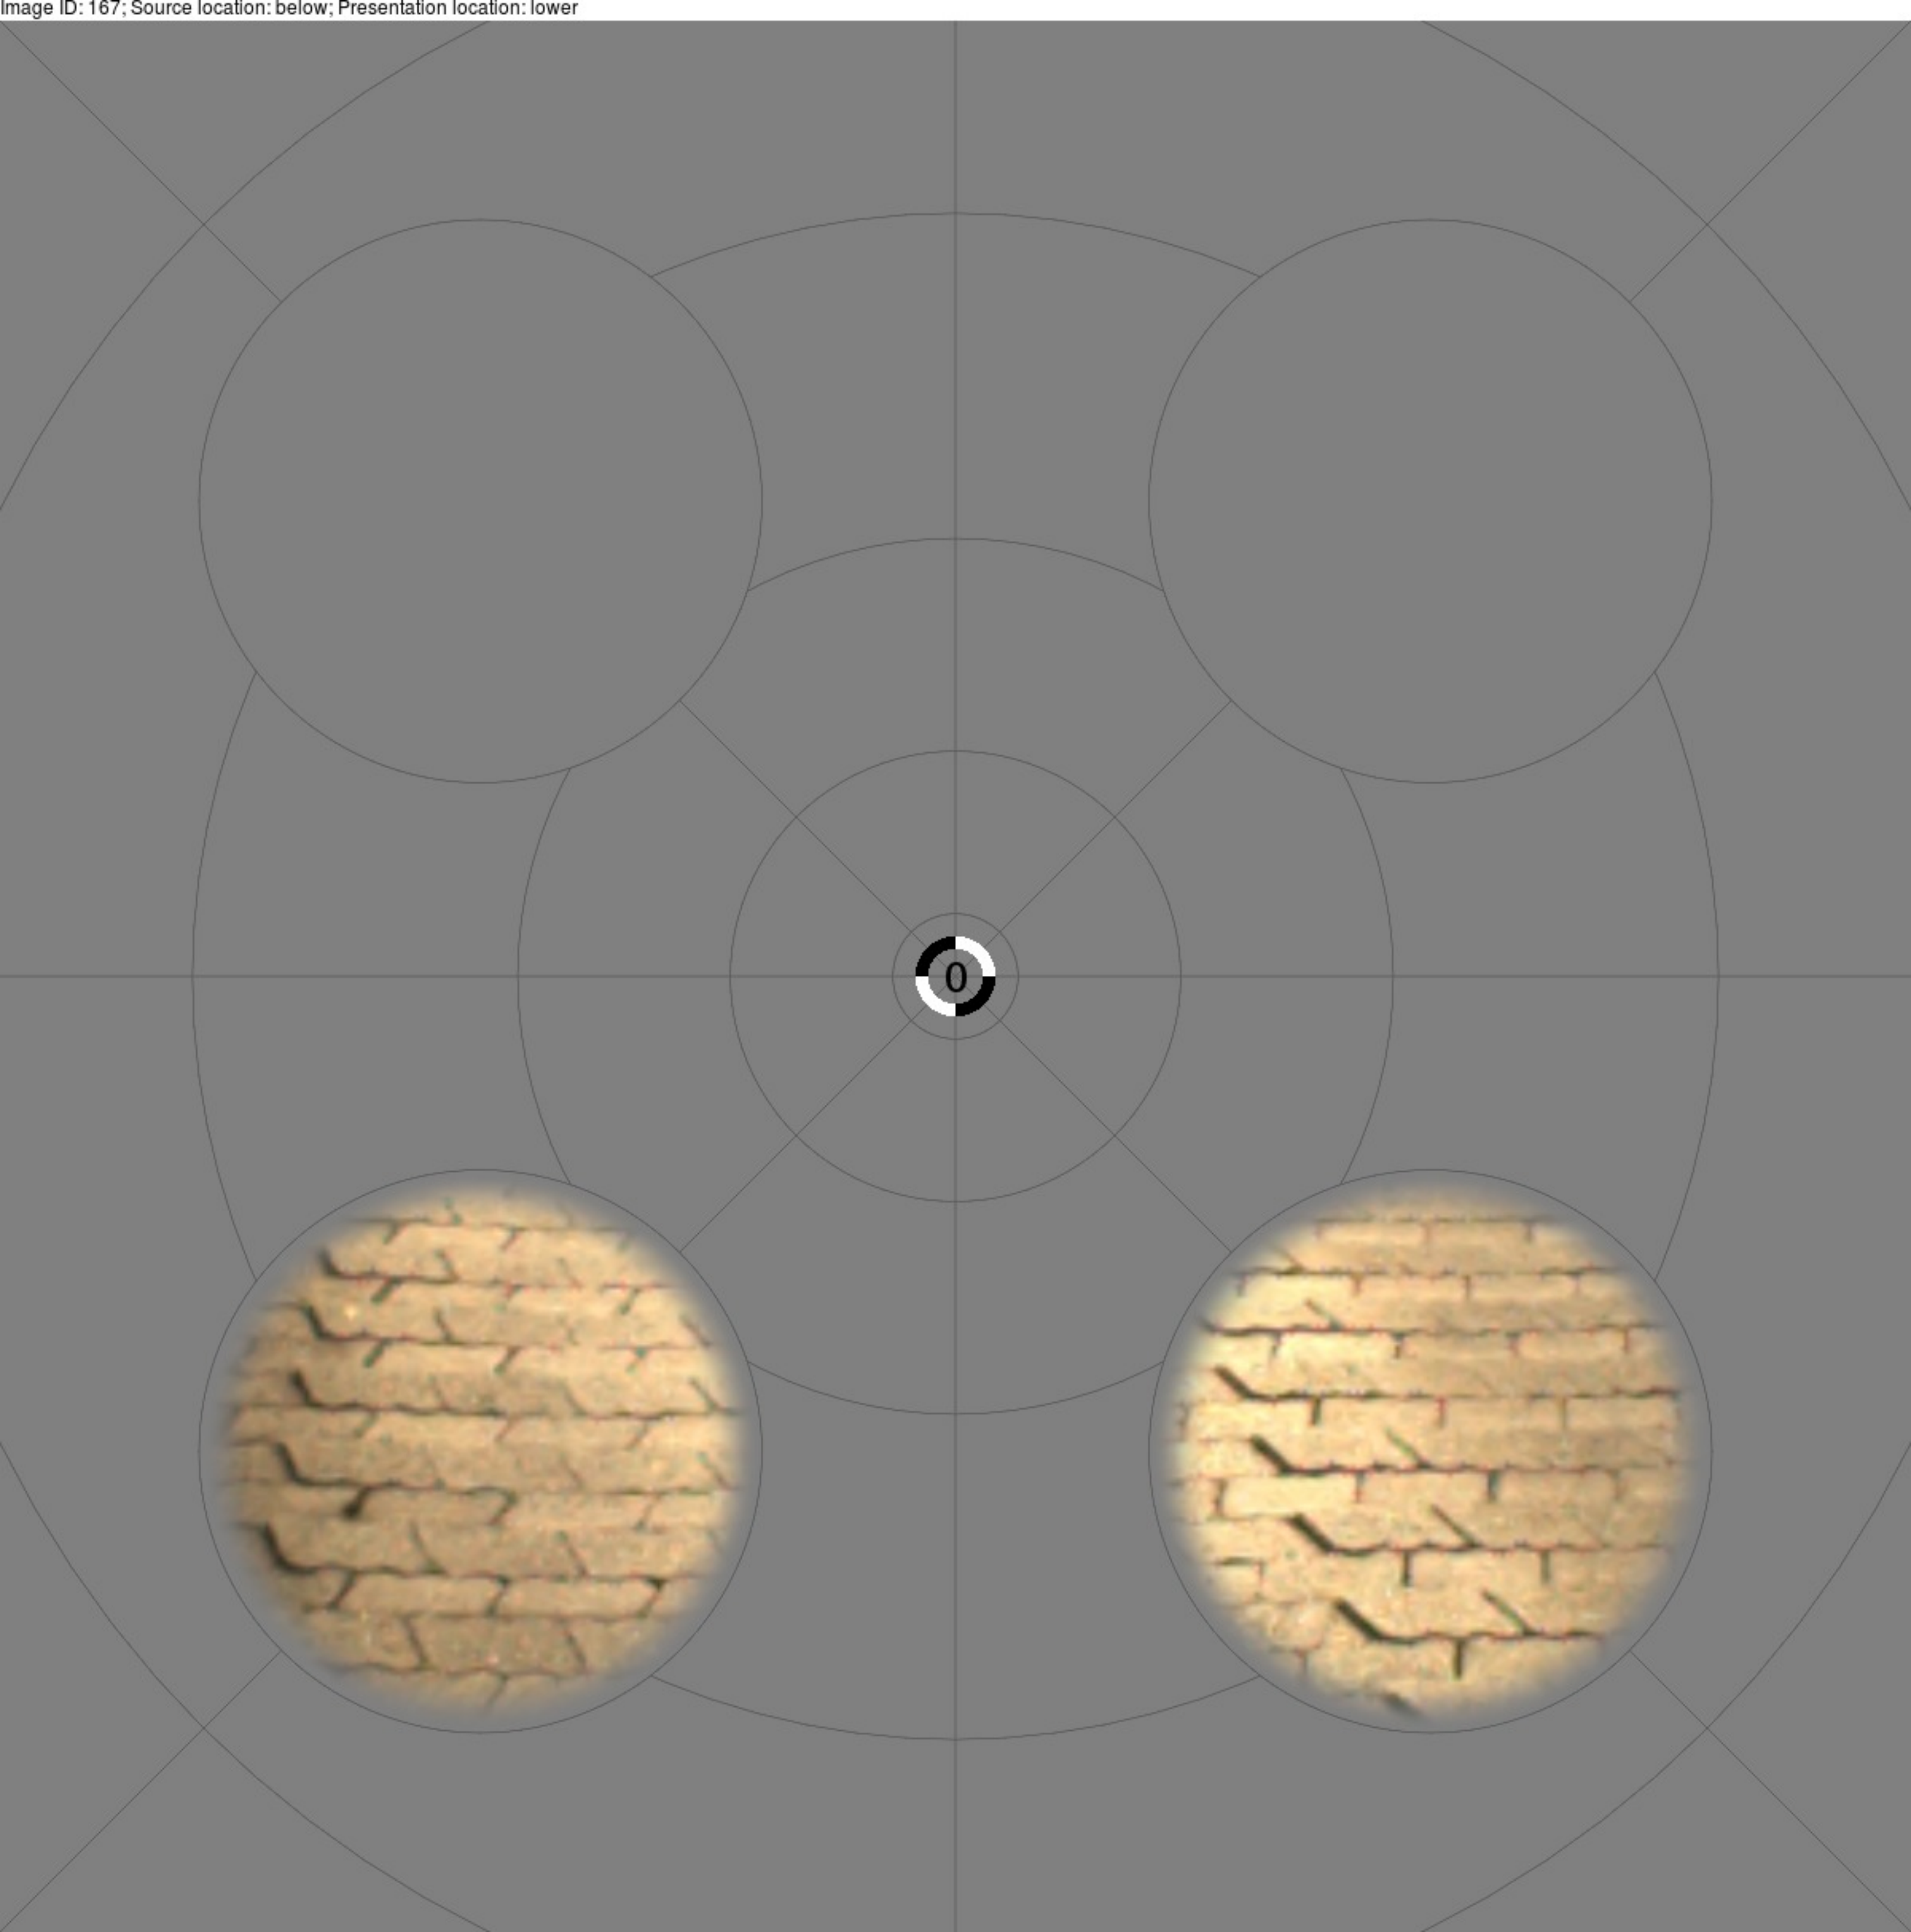



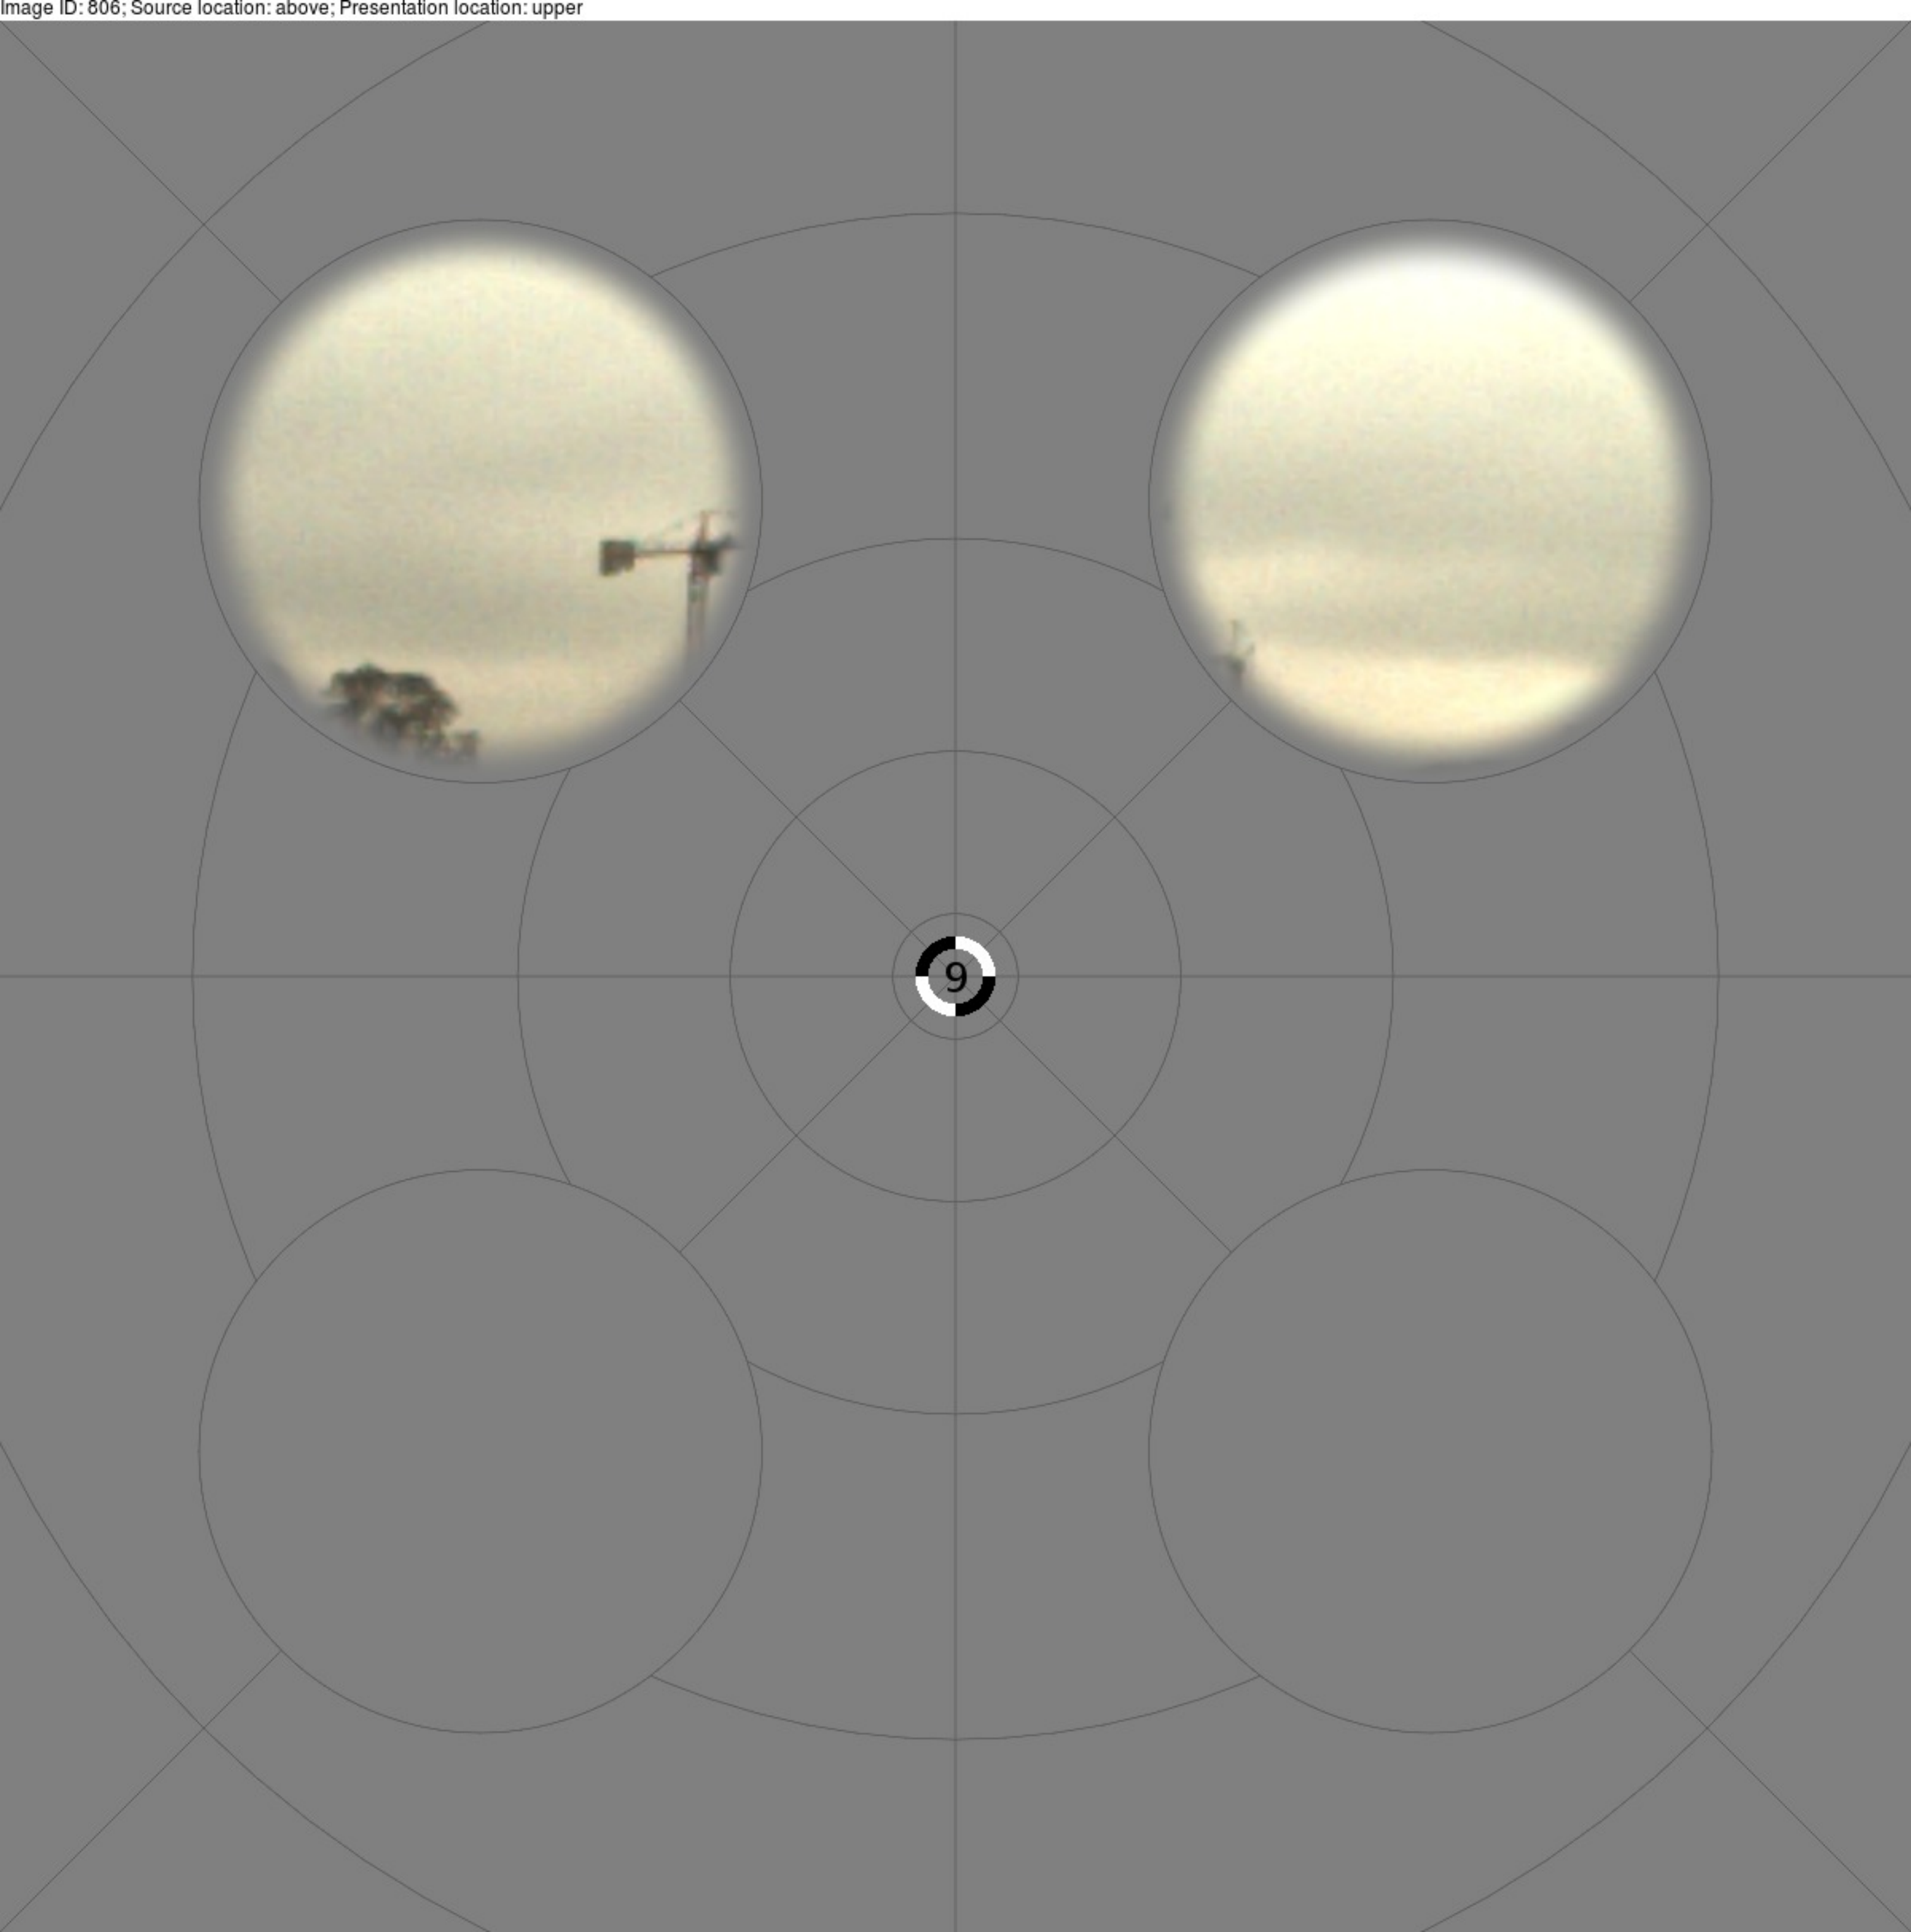

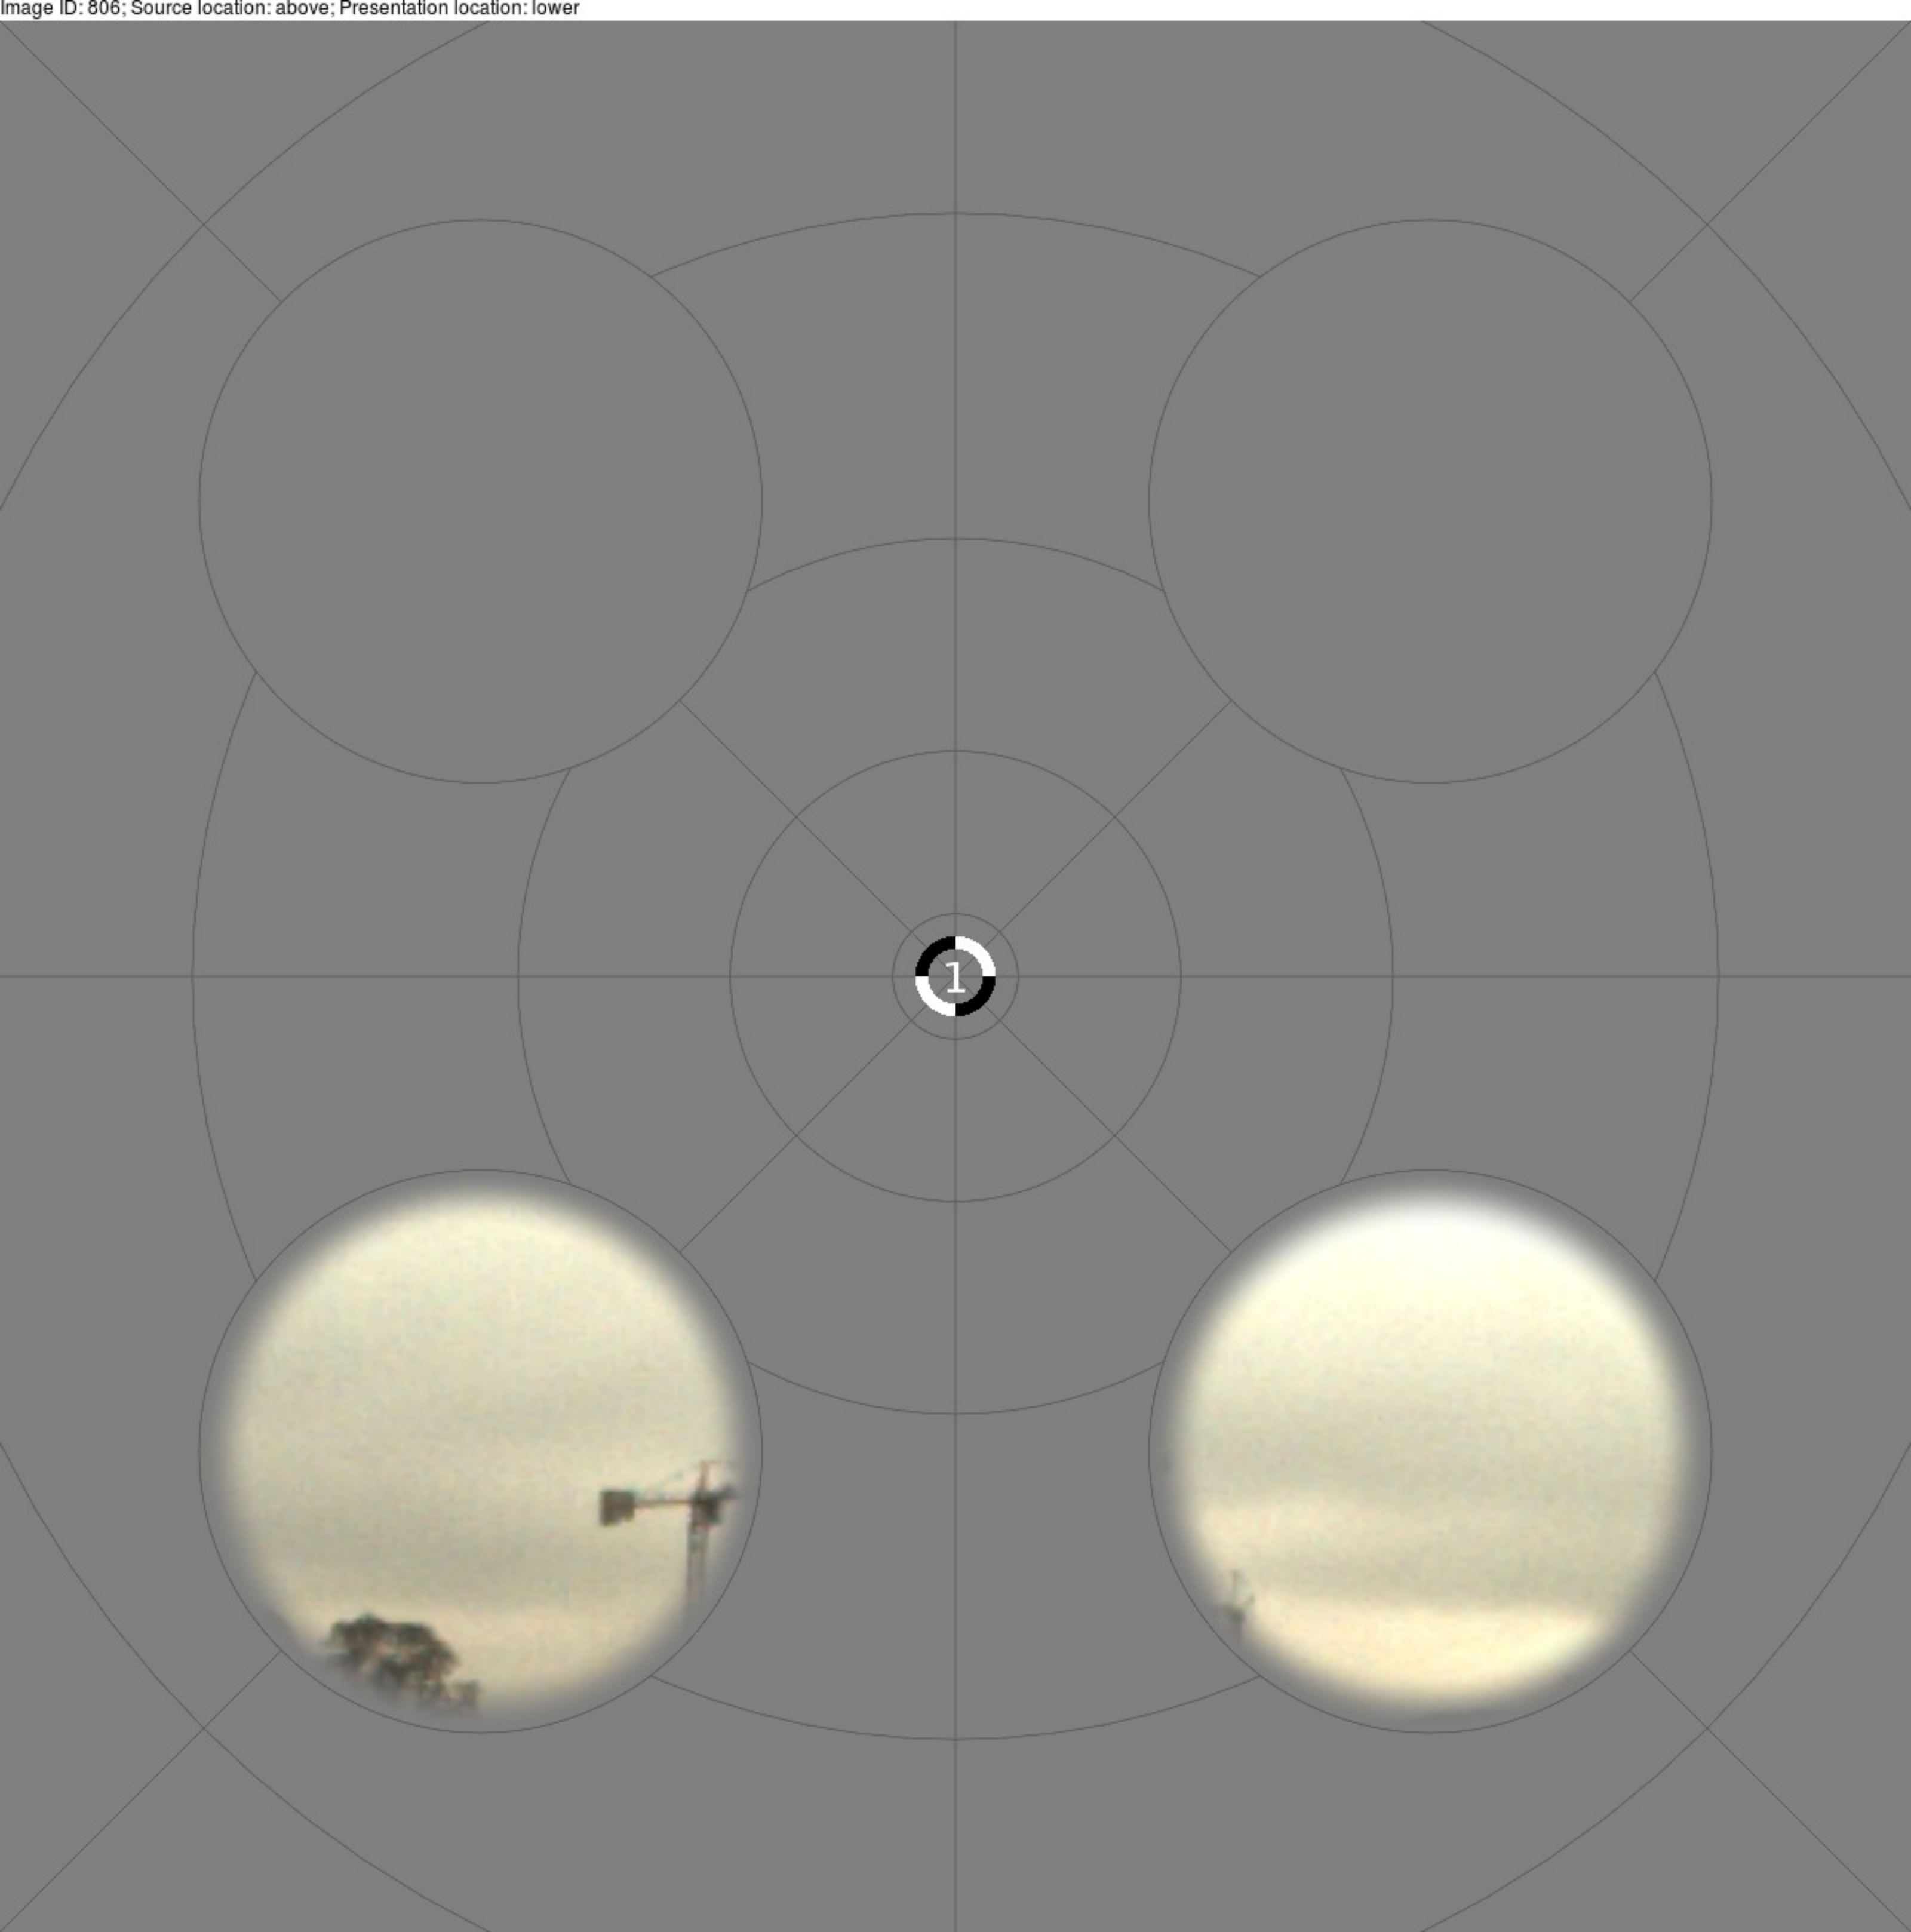

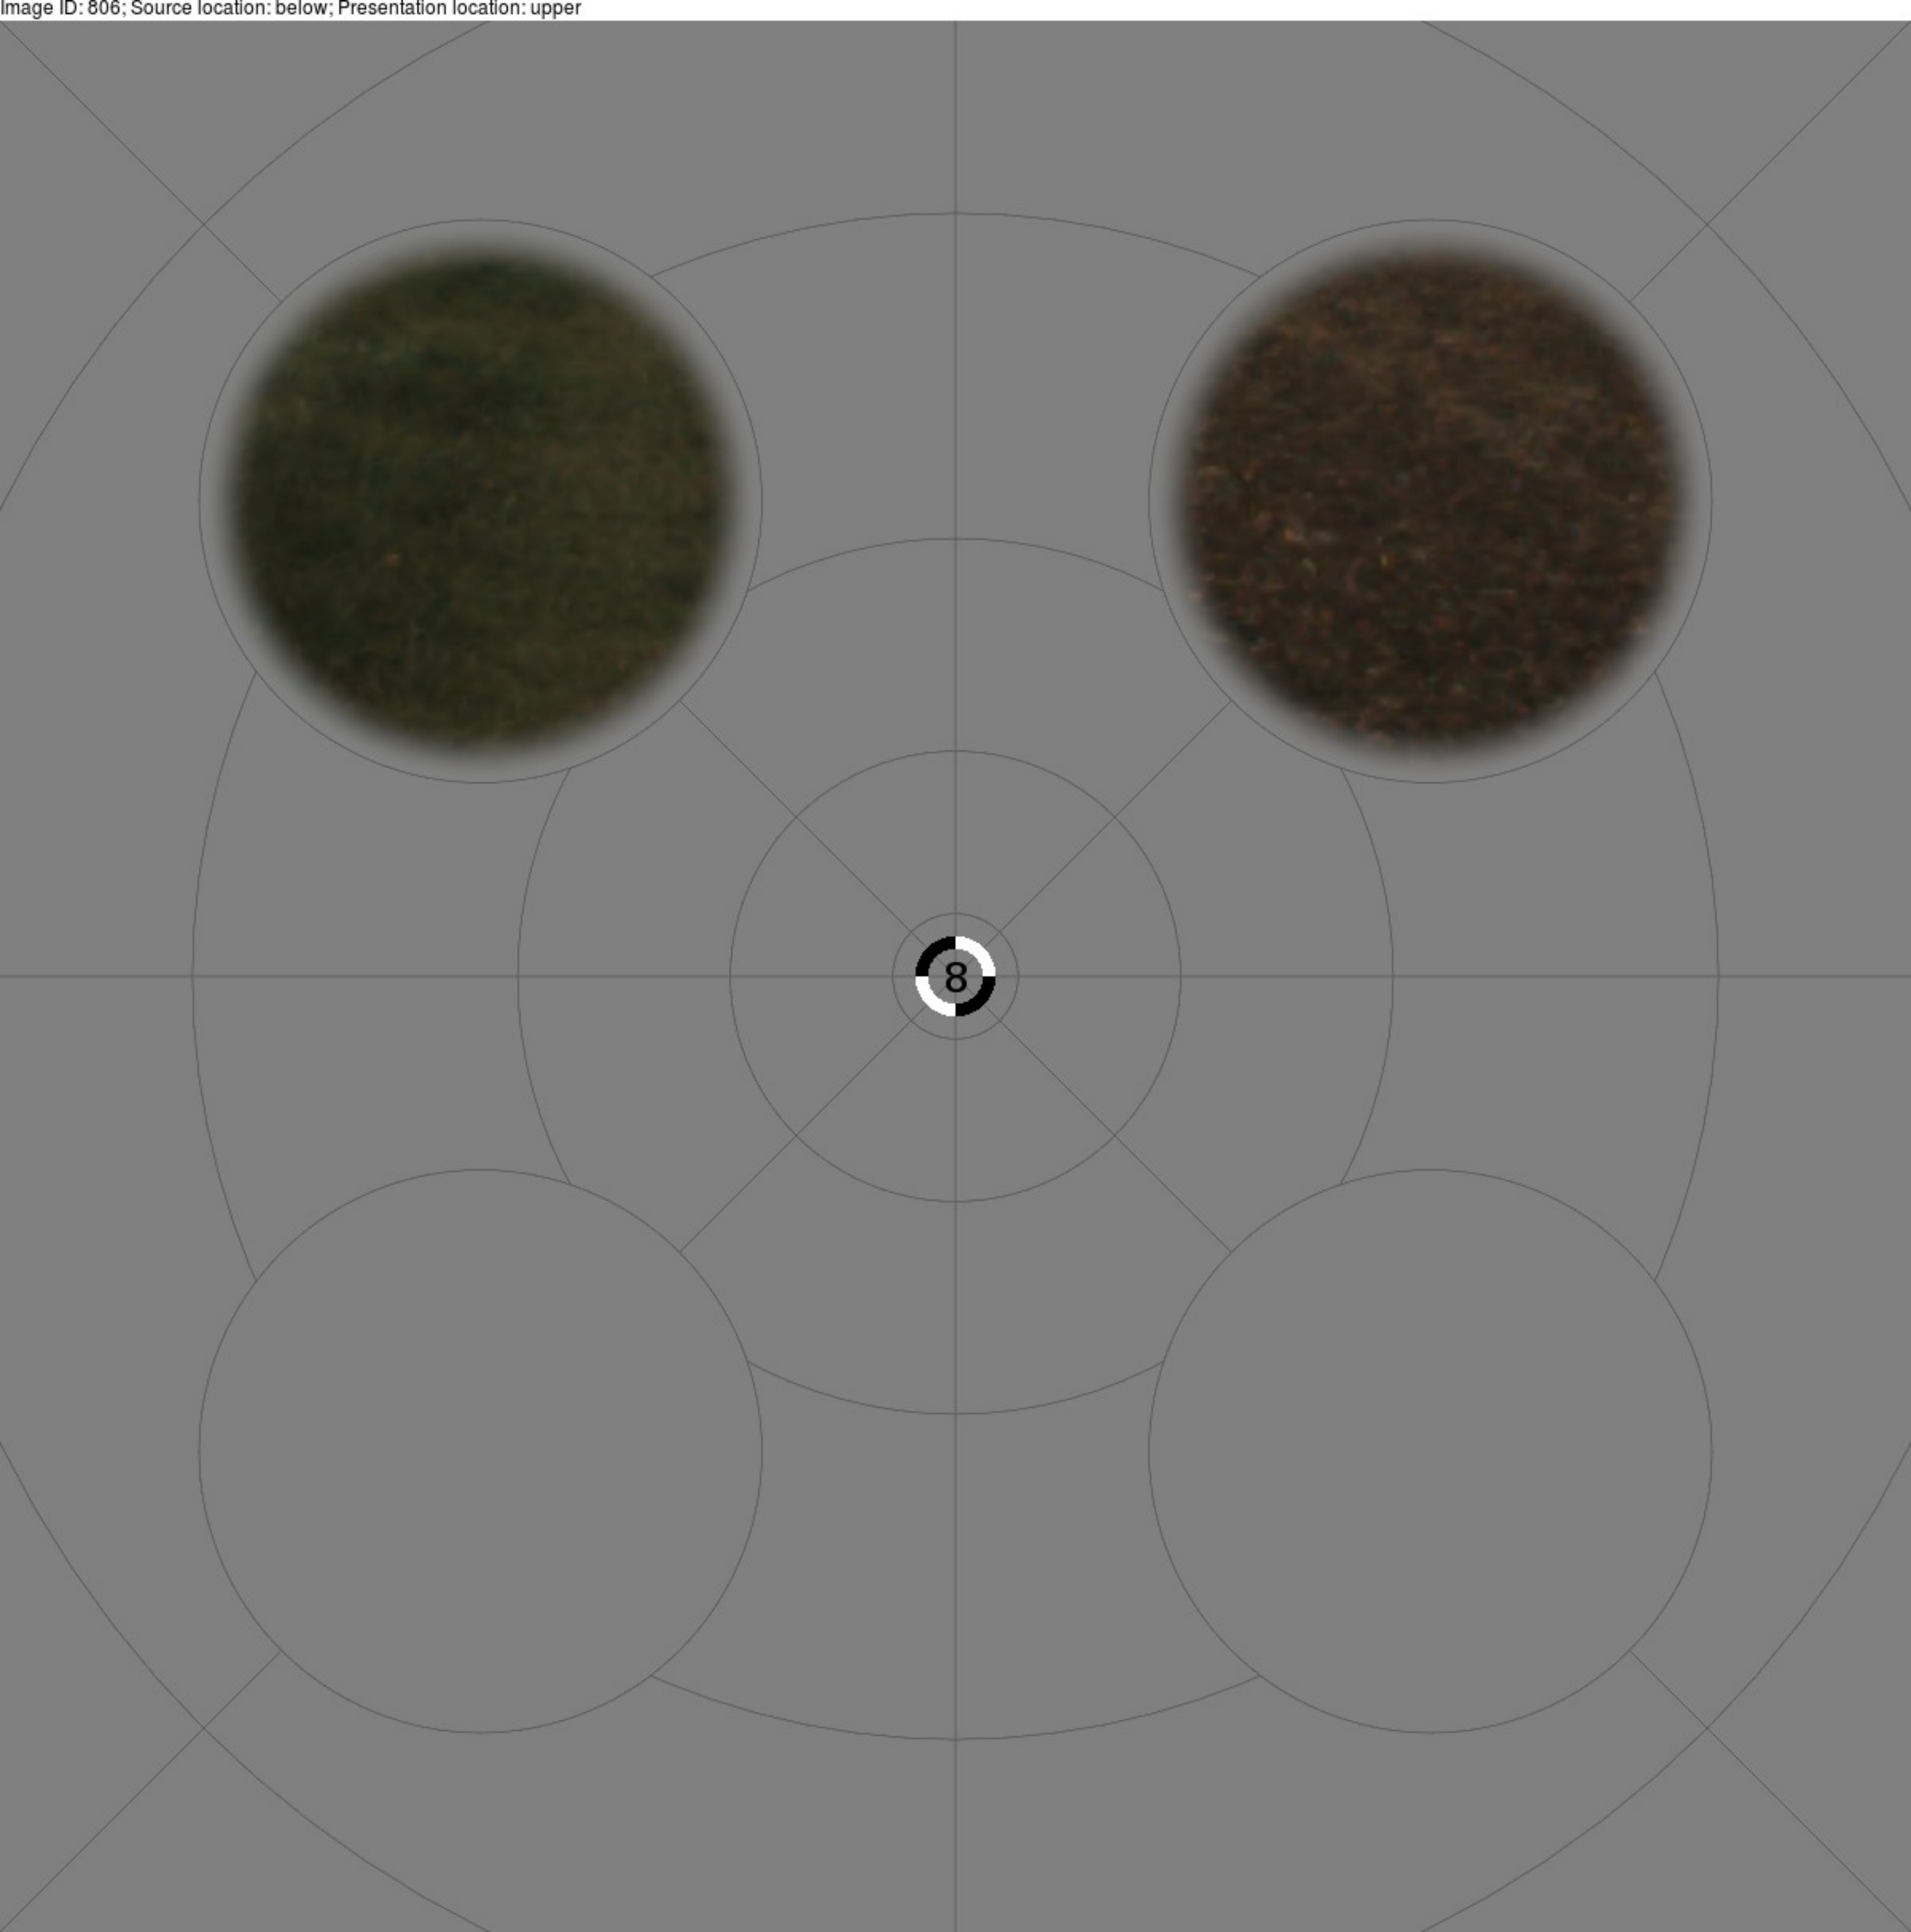



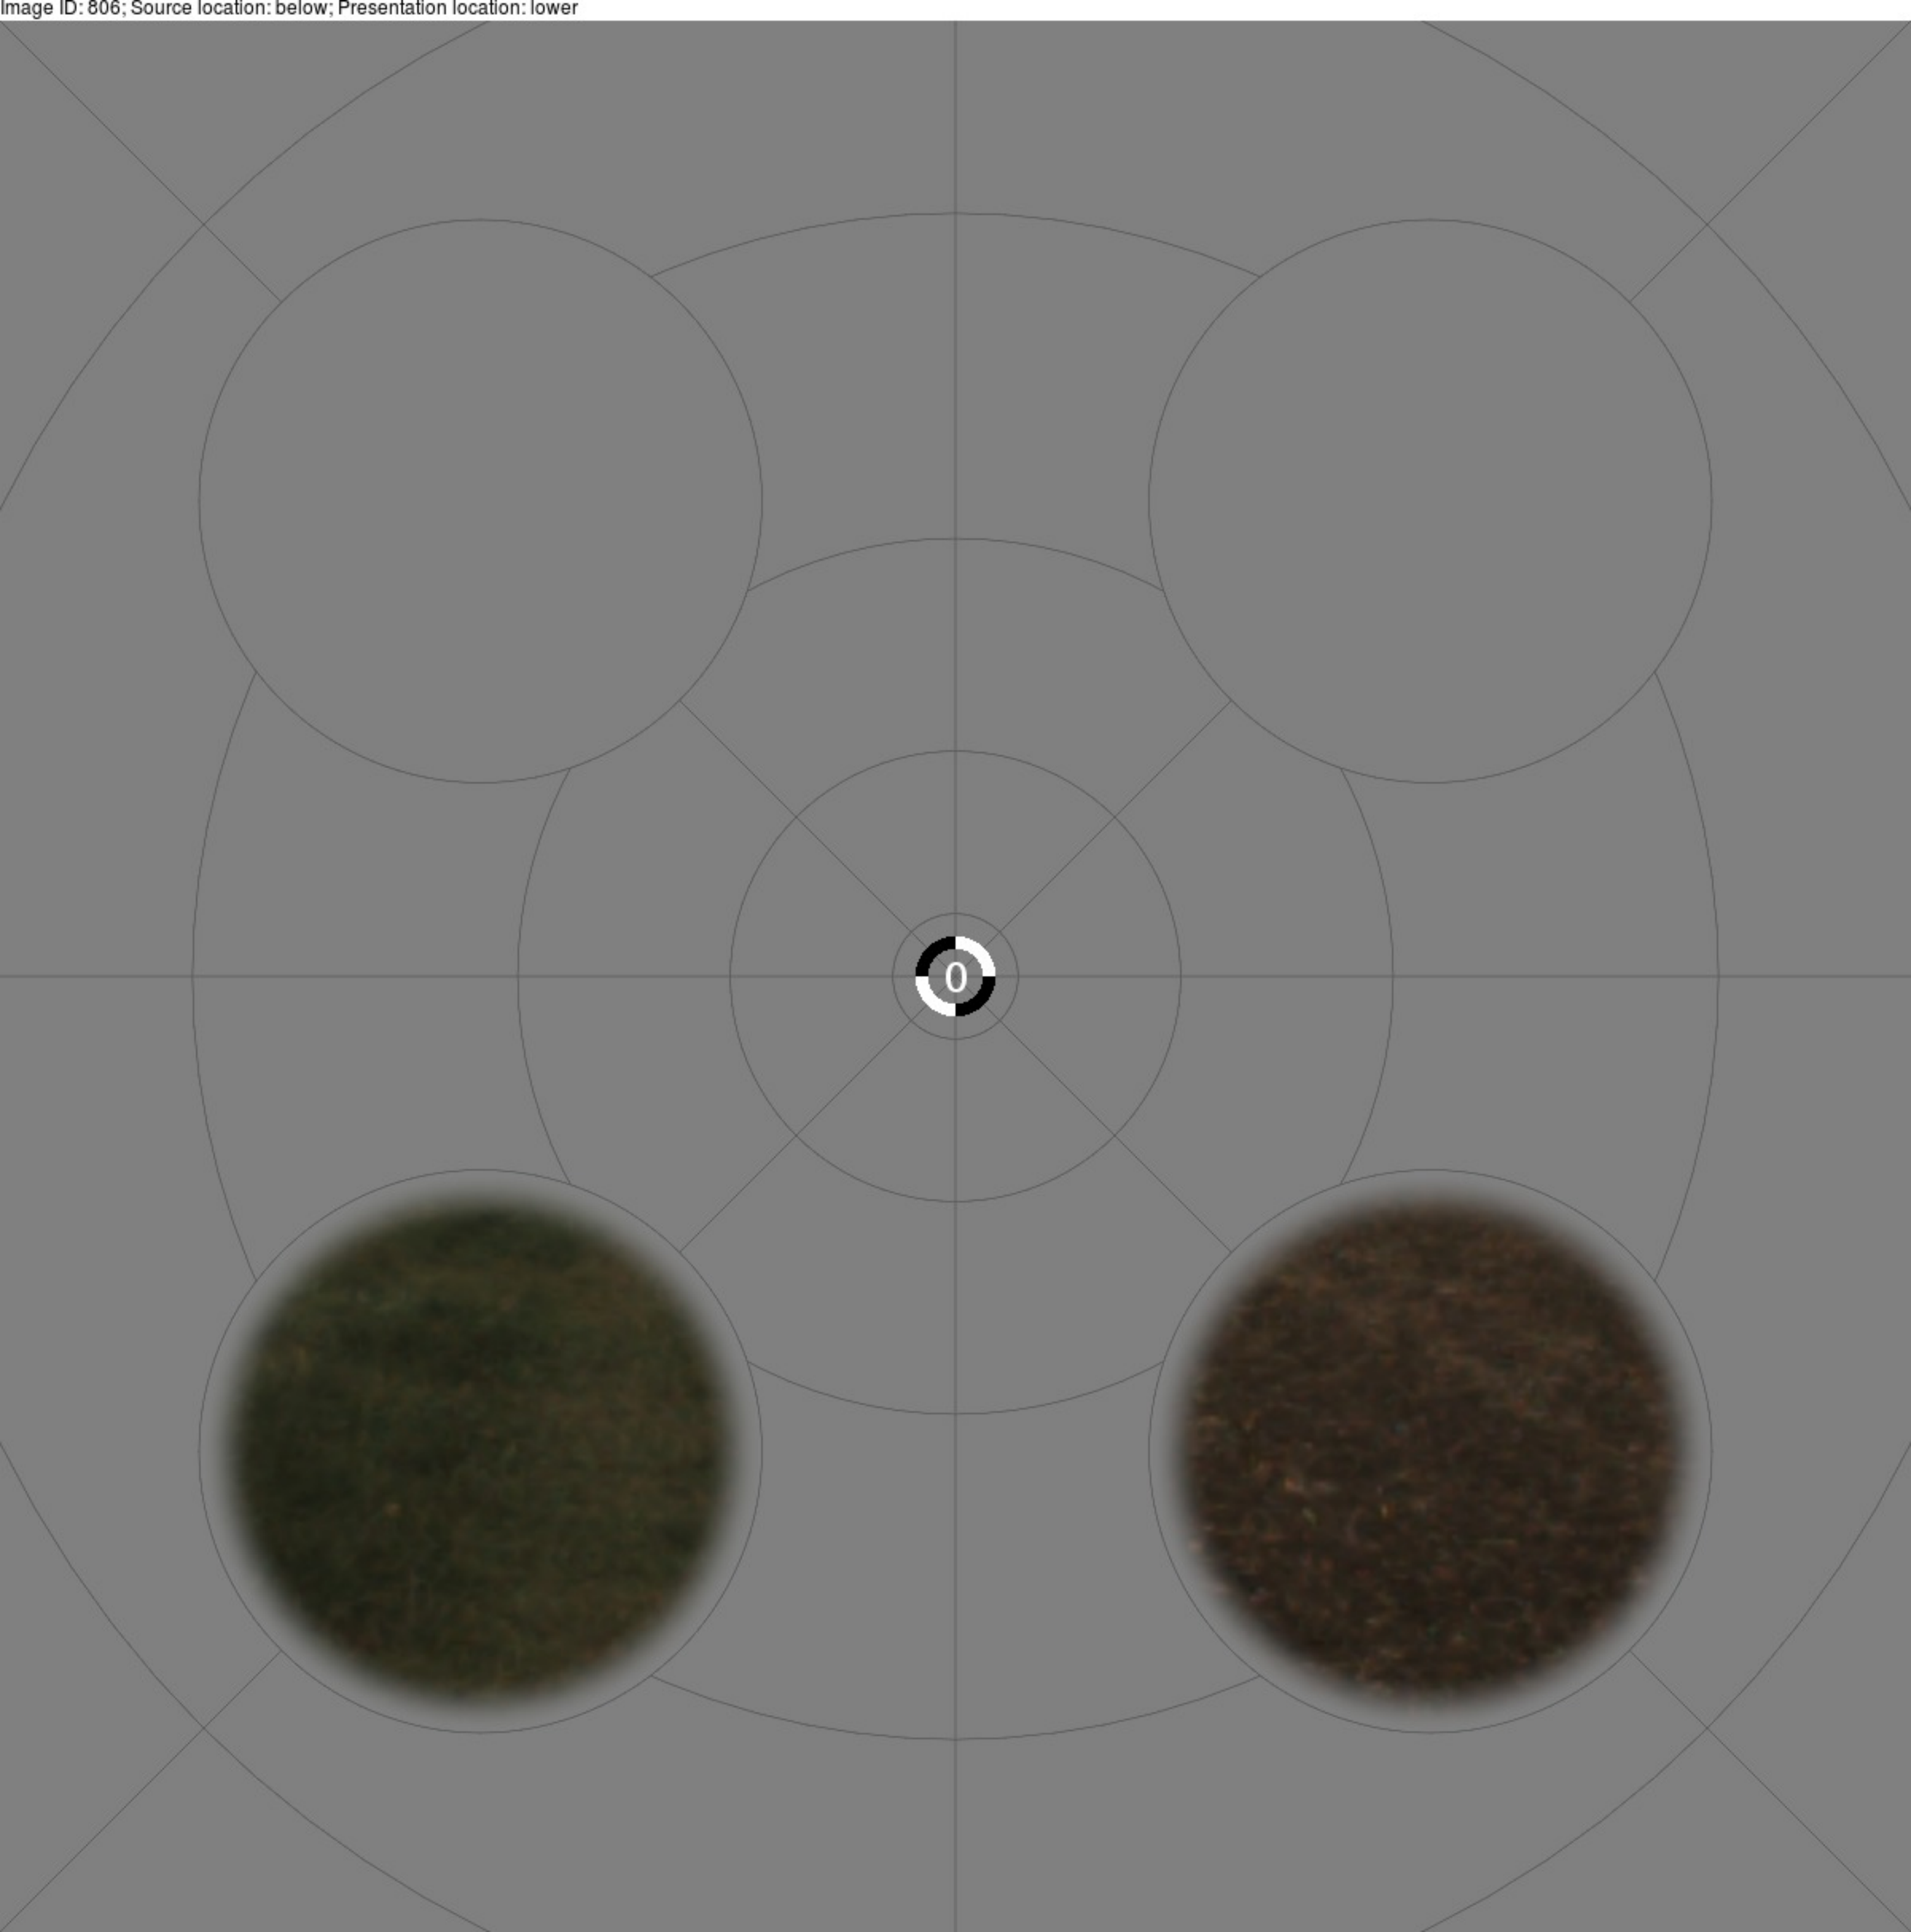

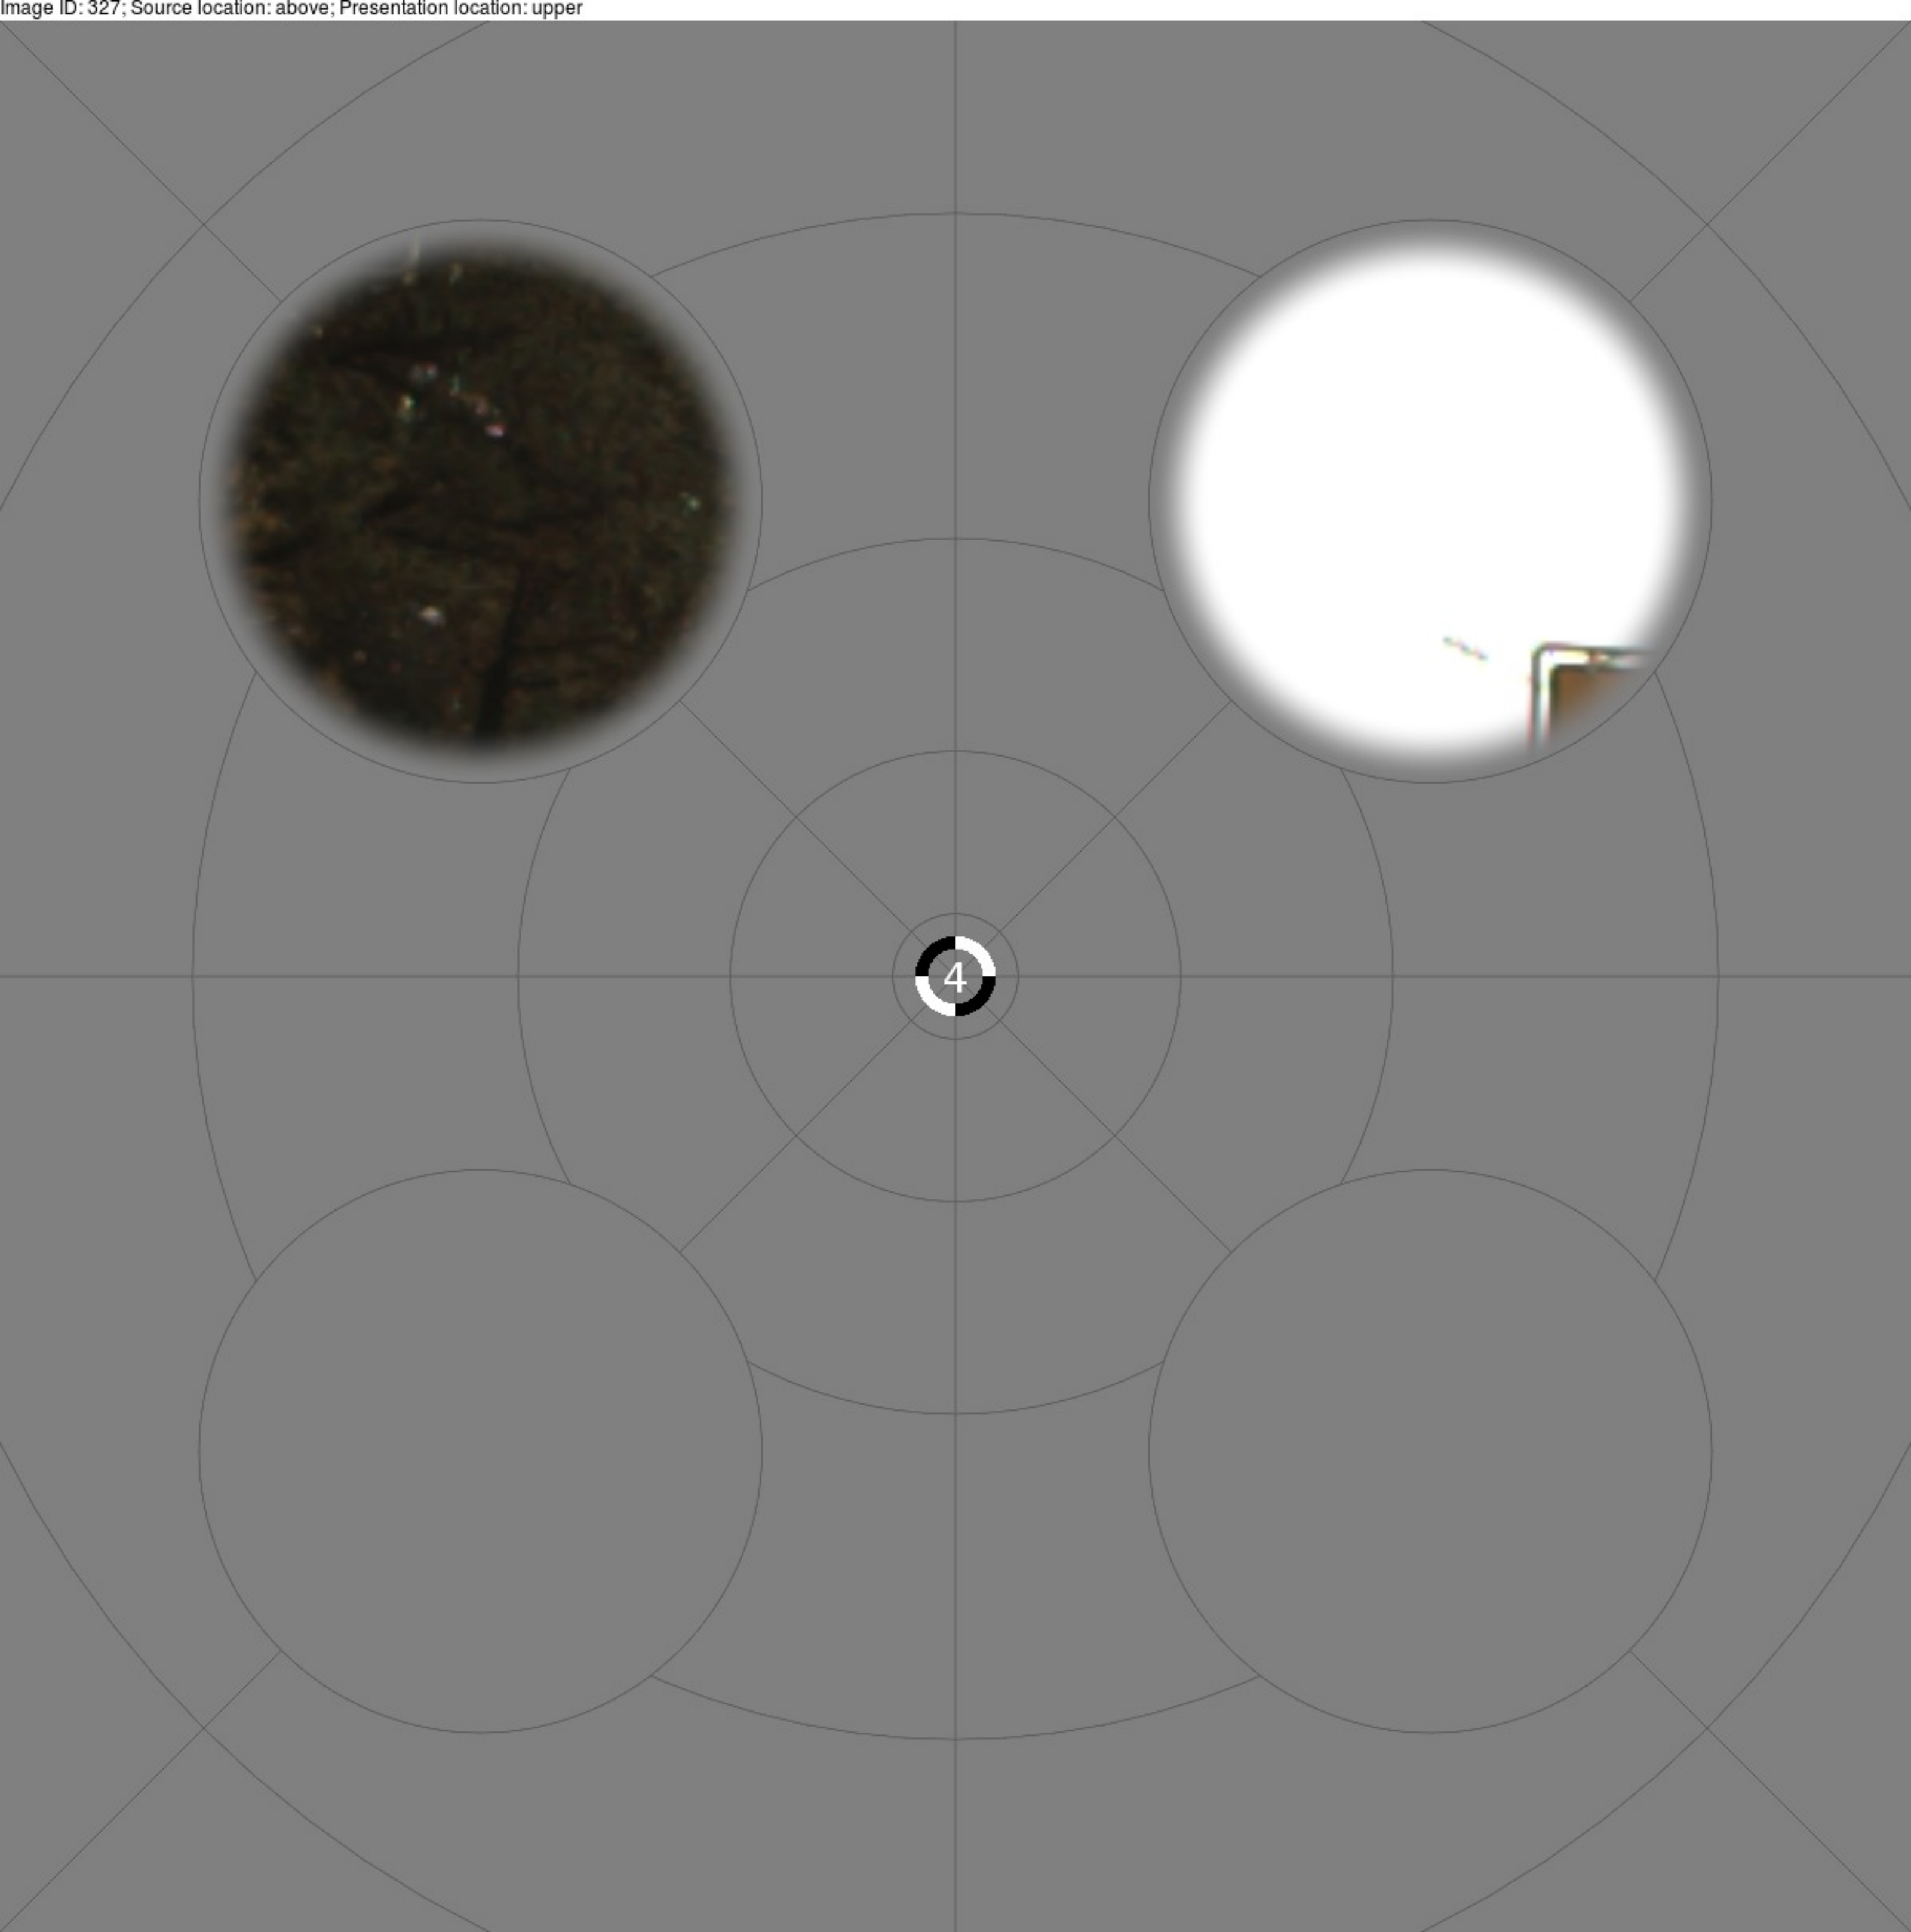

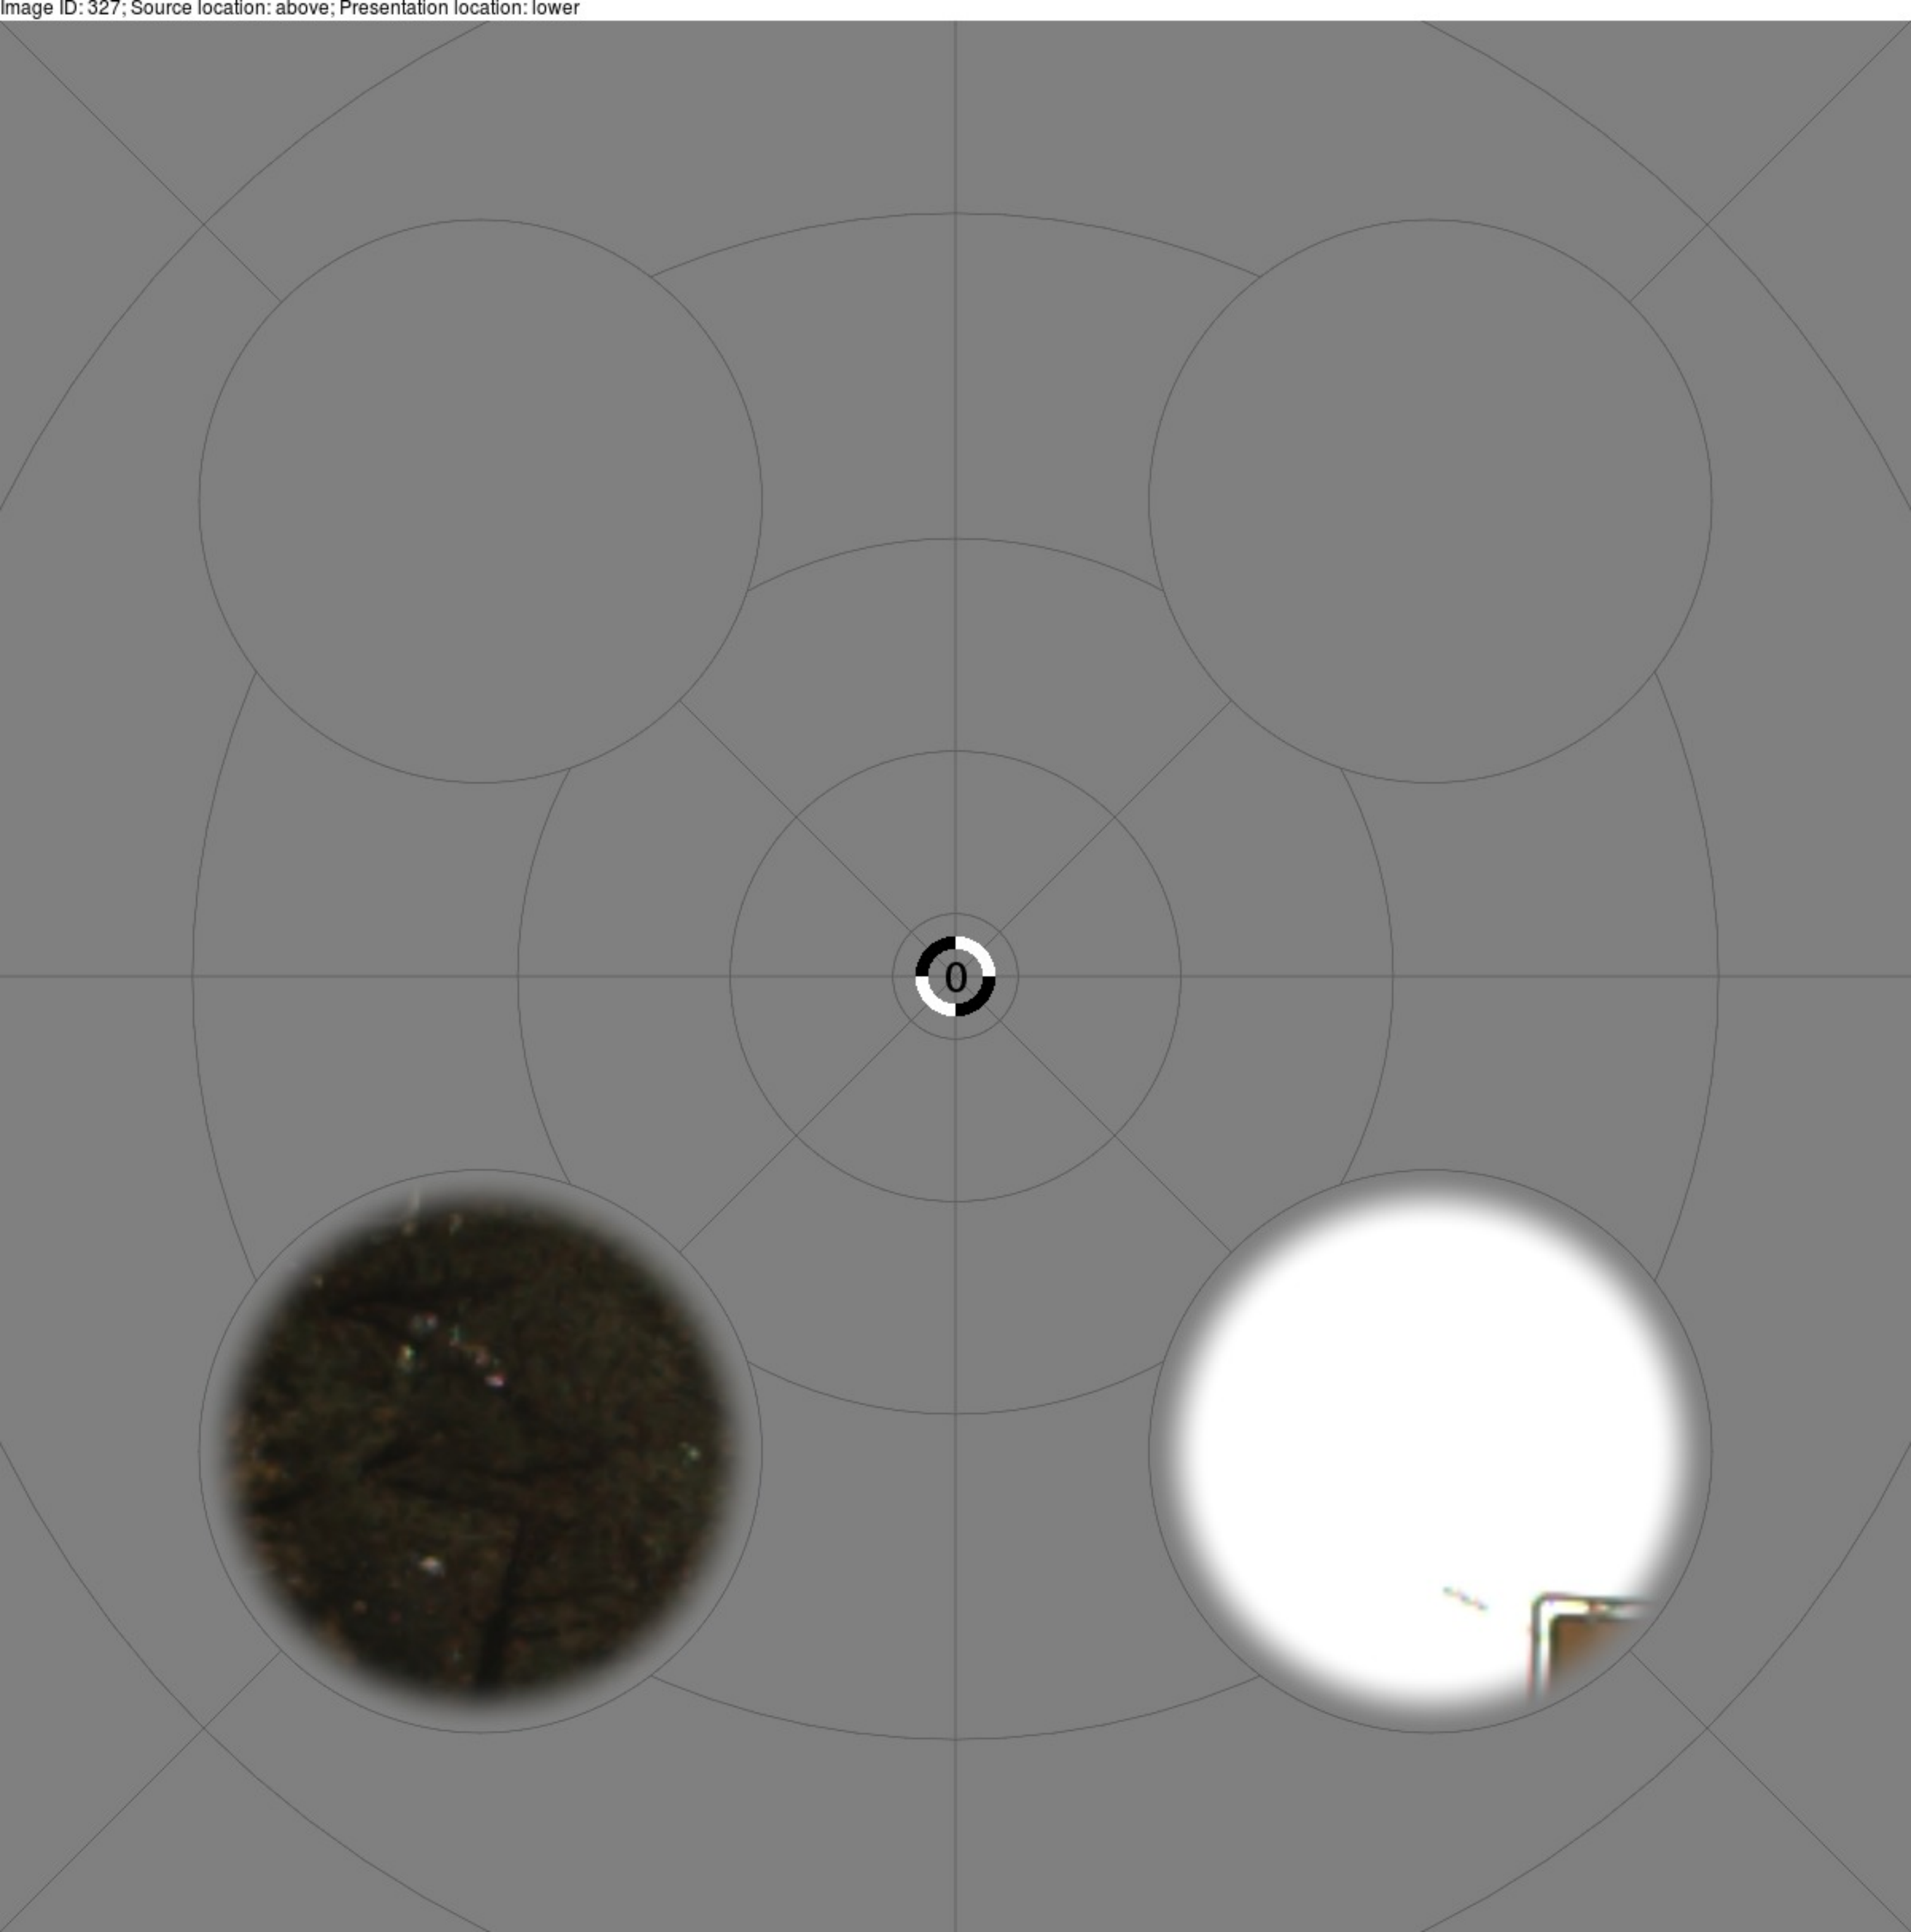



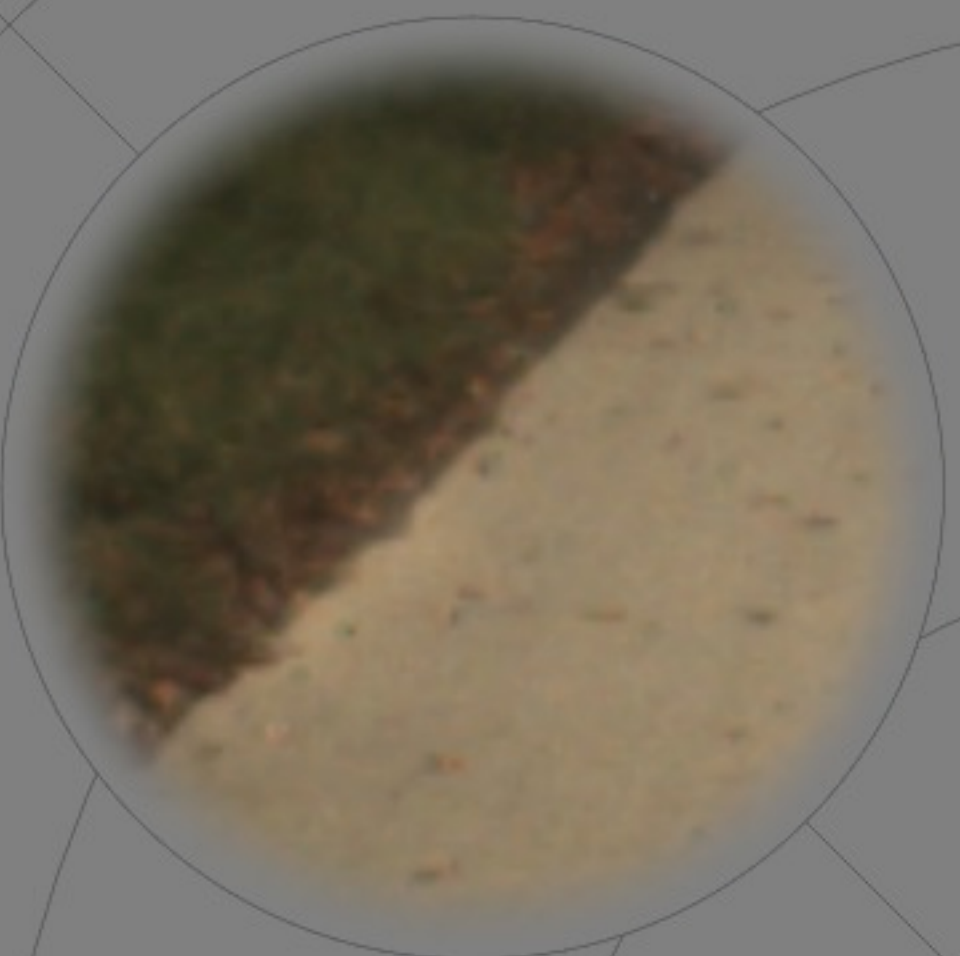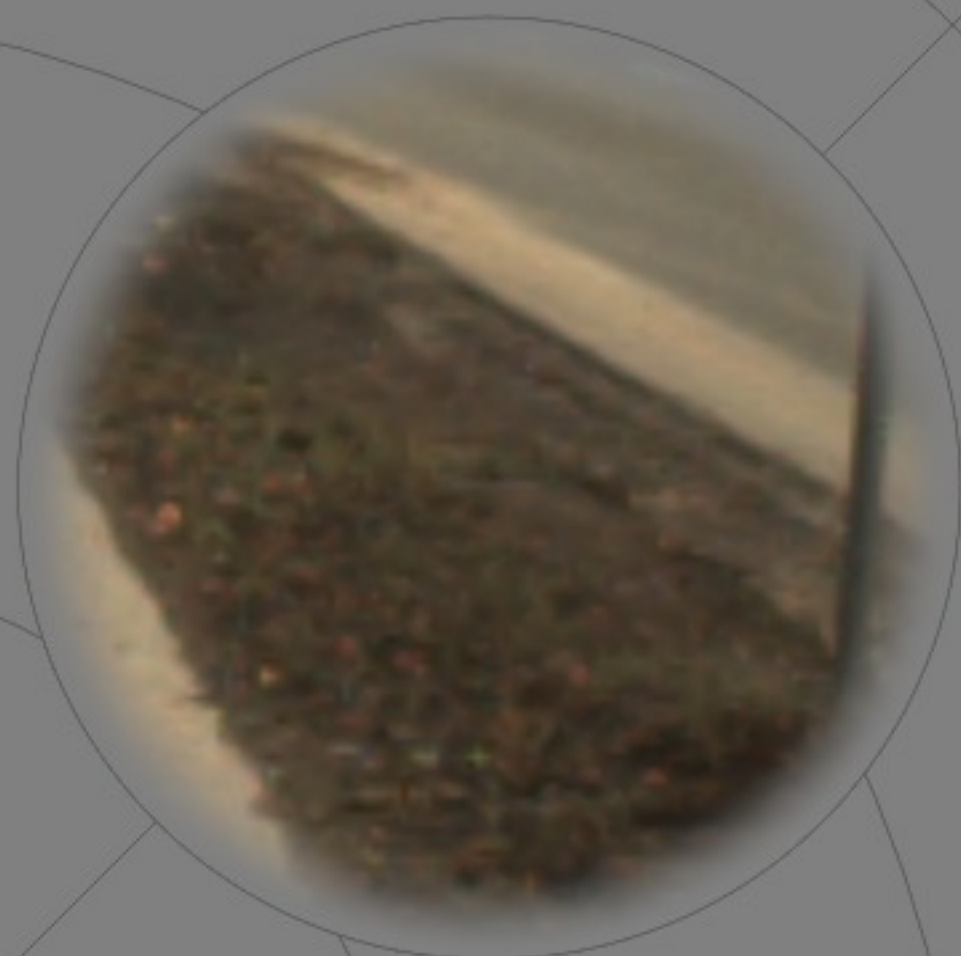

2

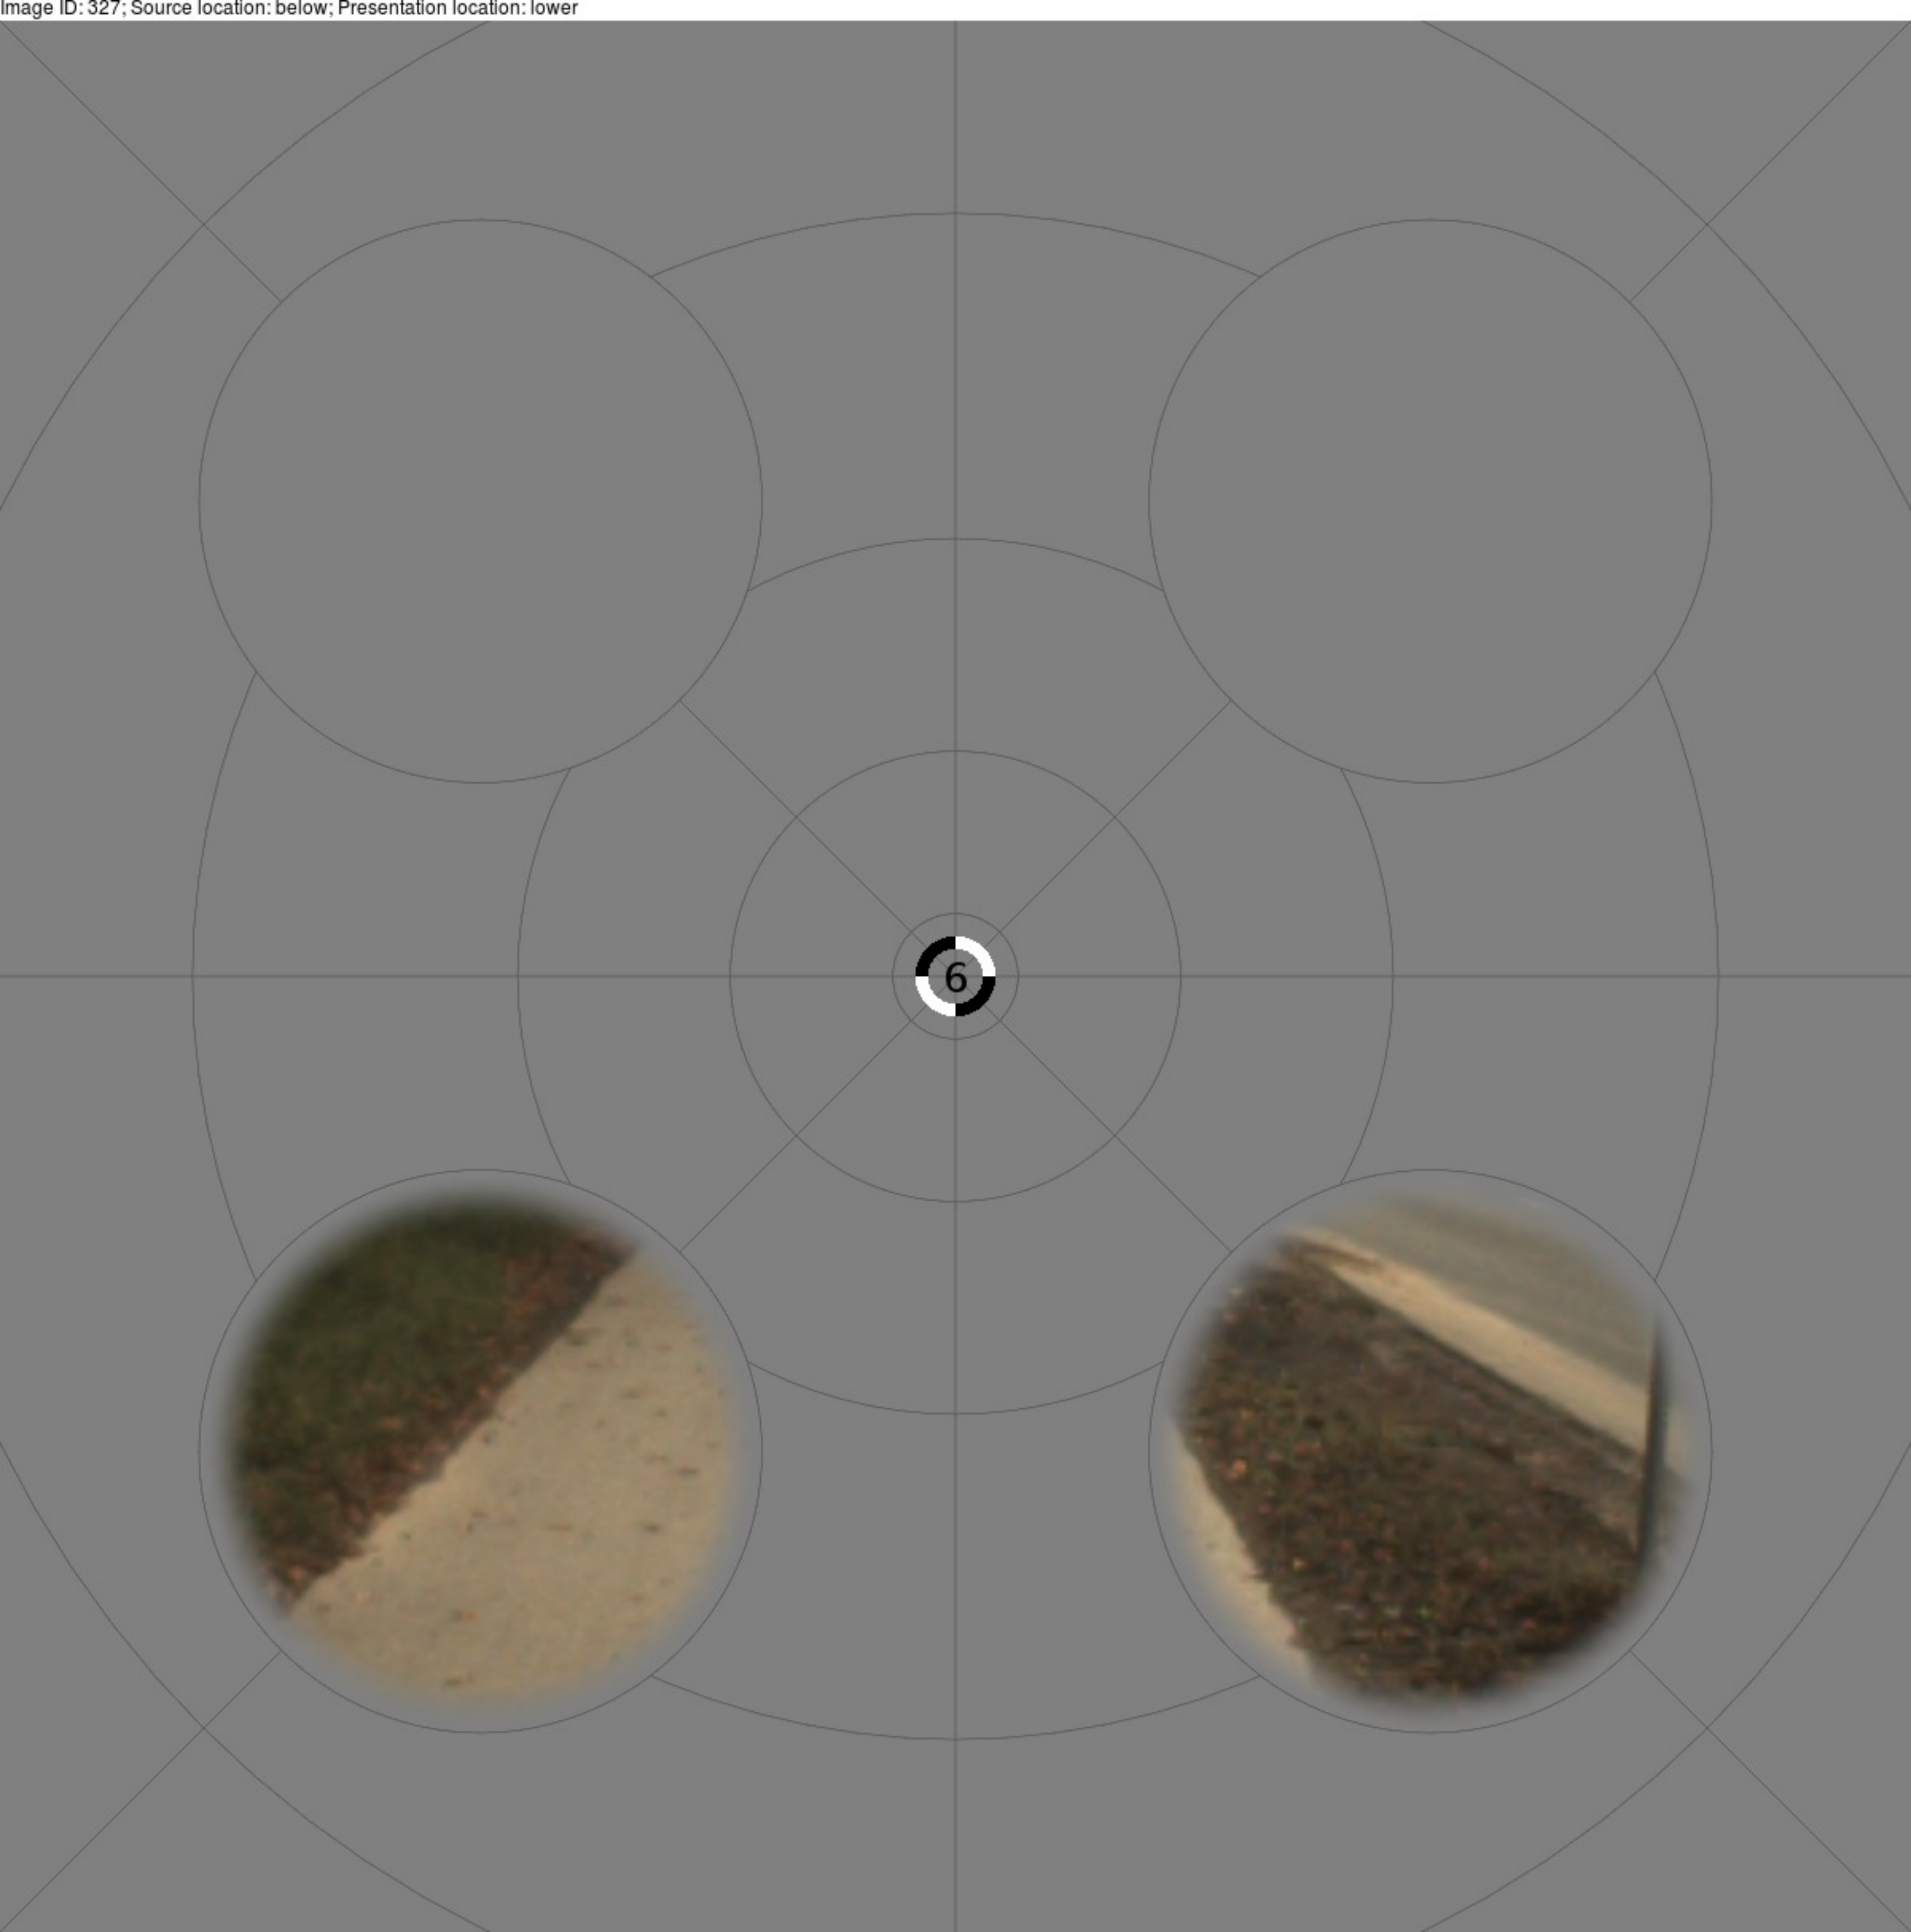

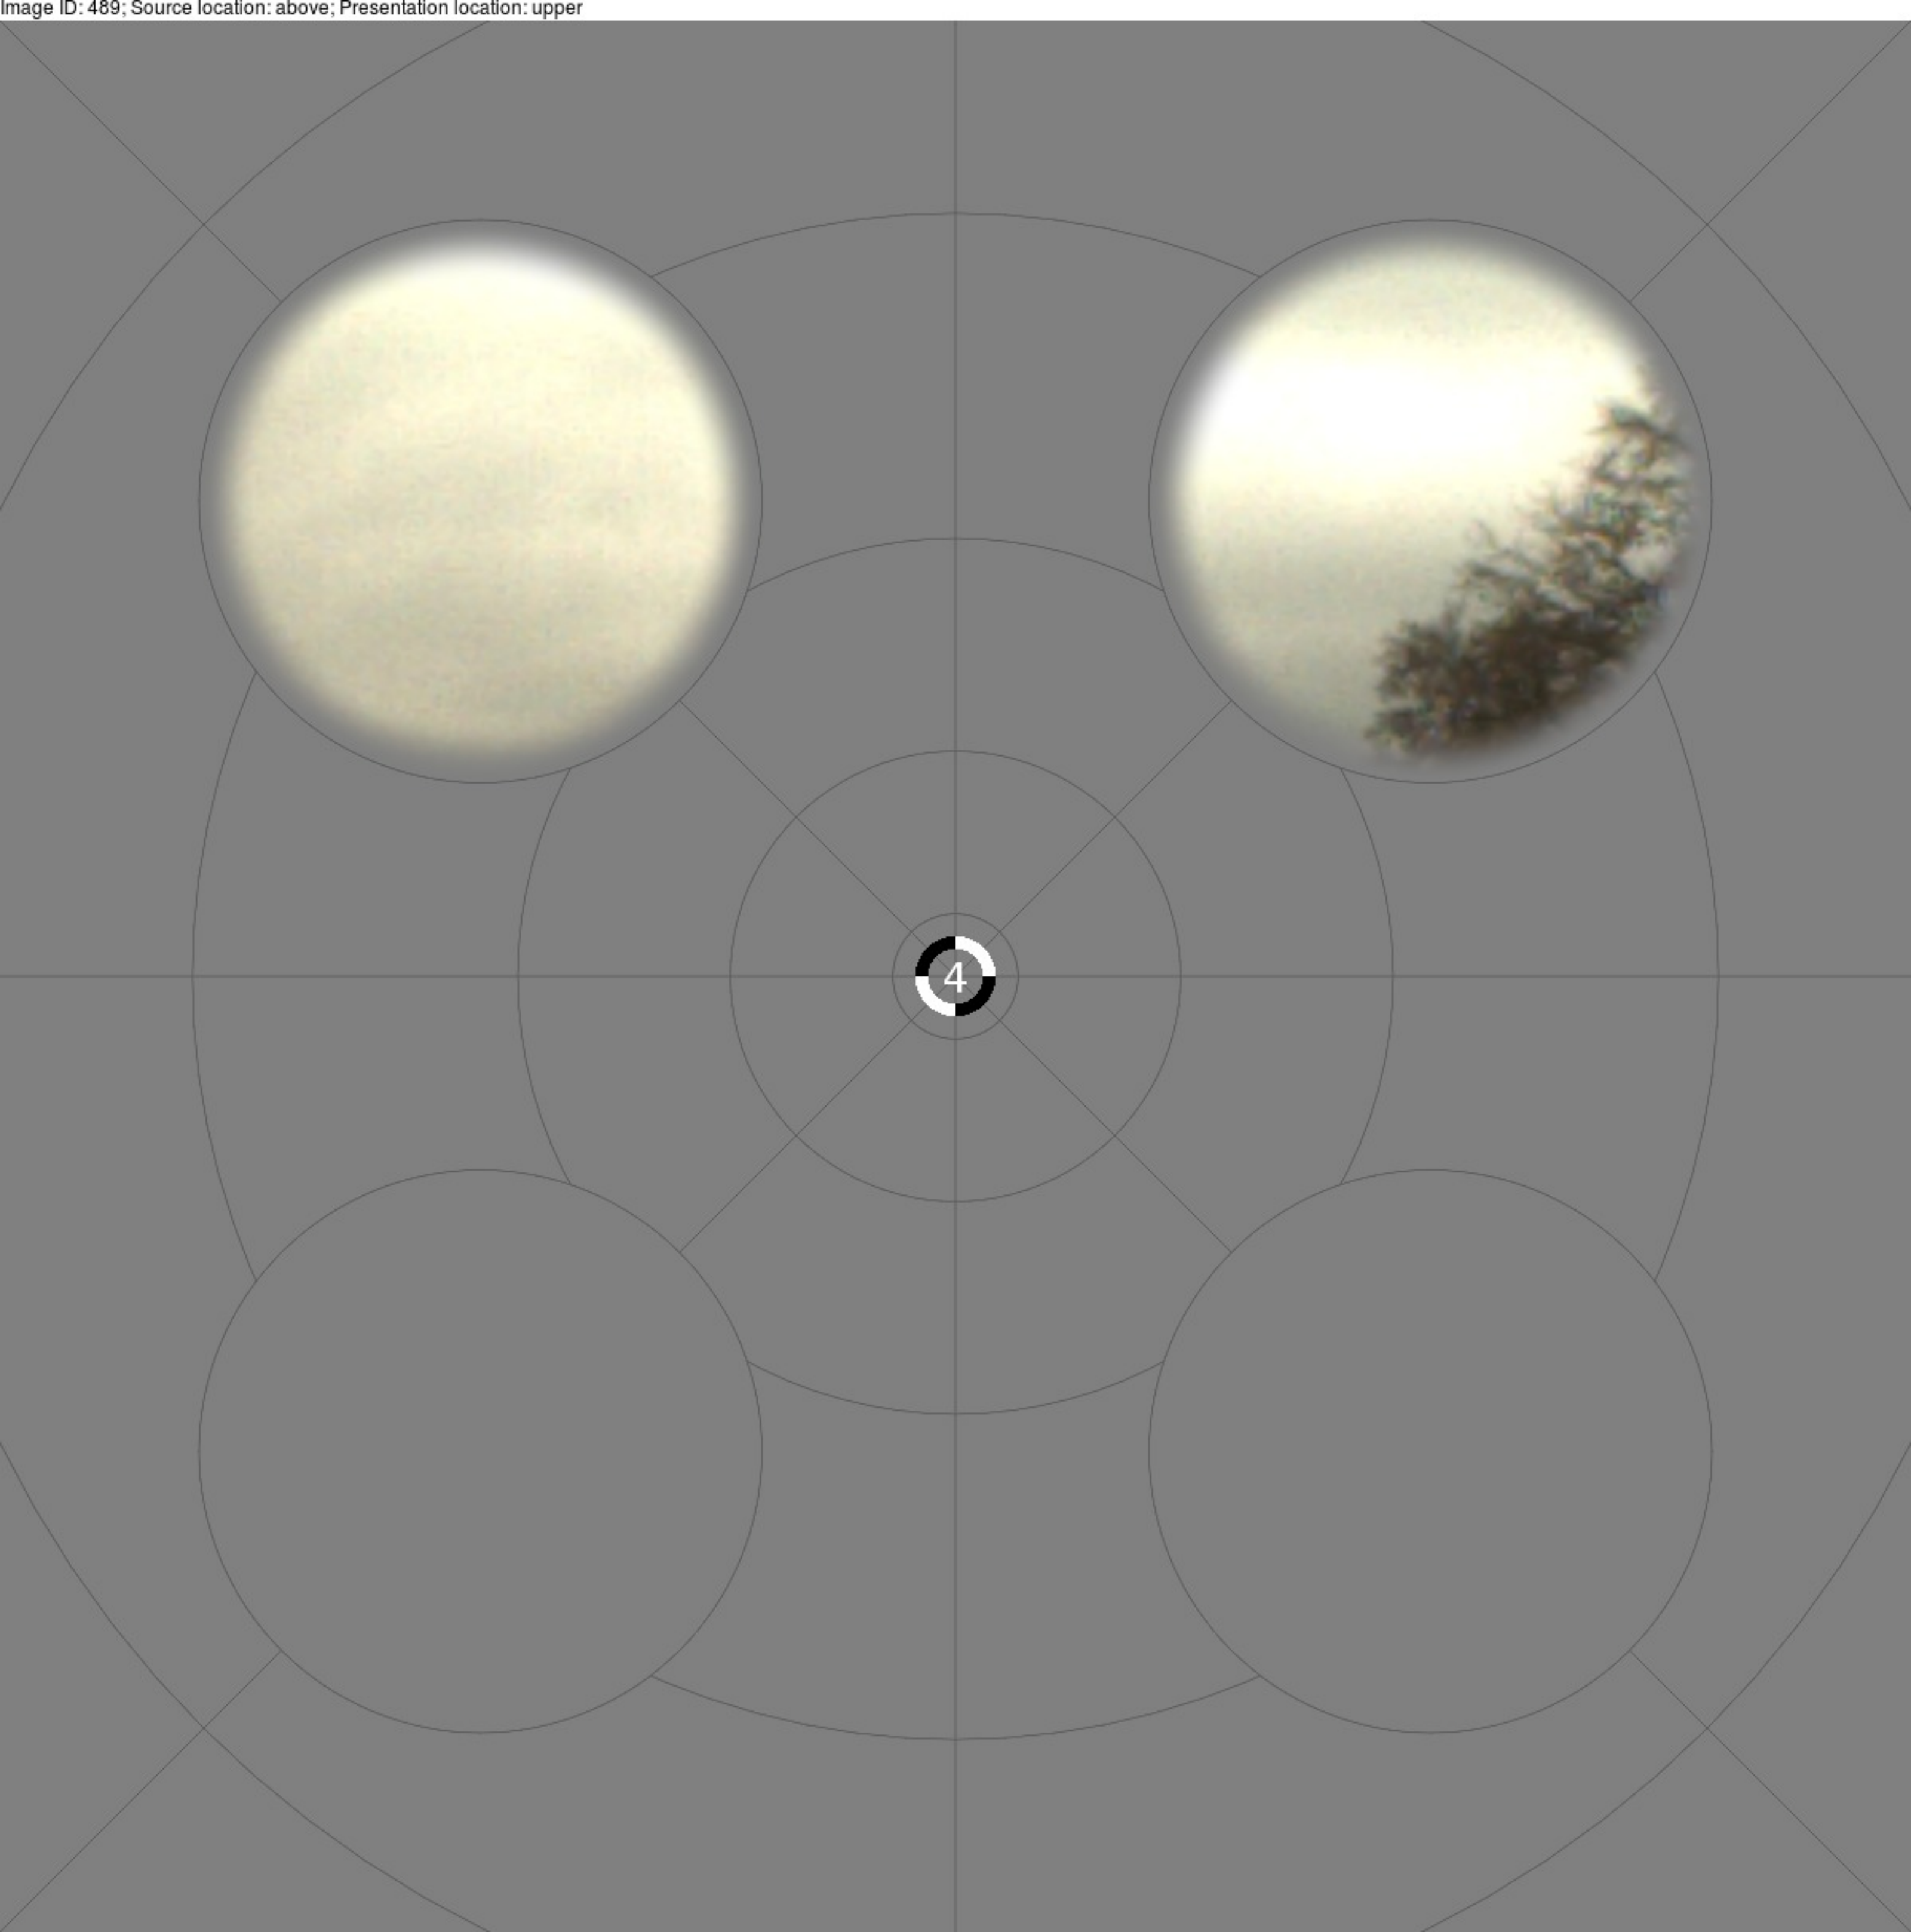



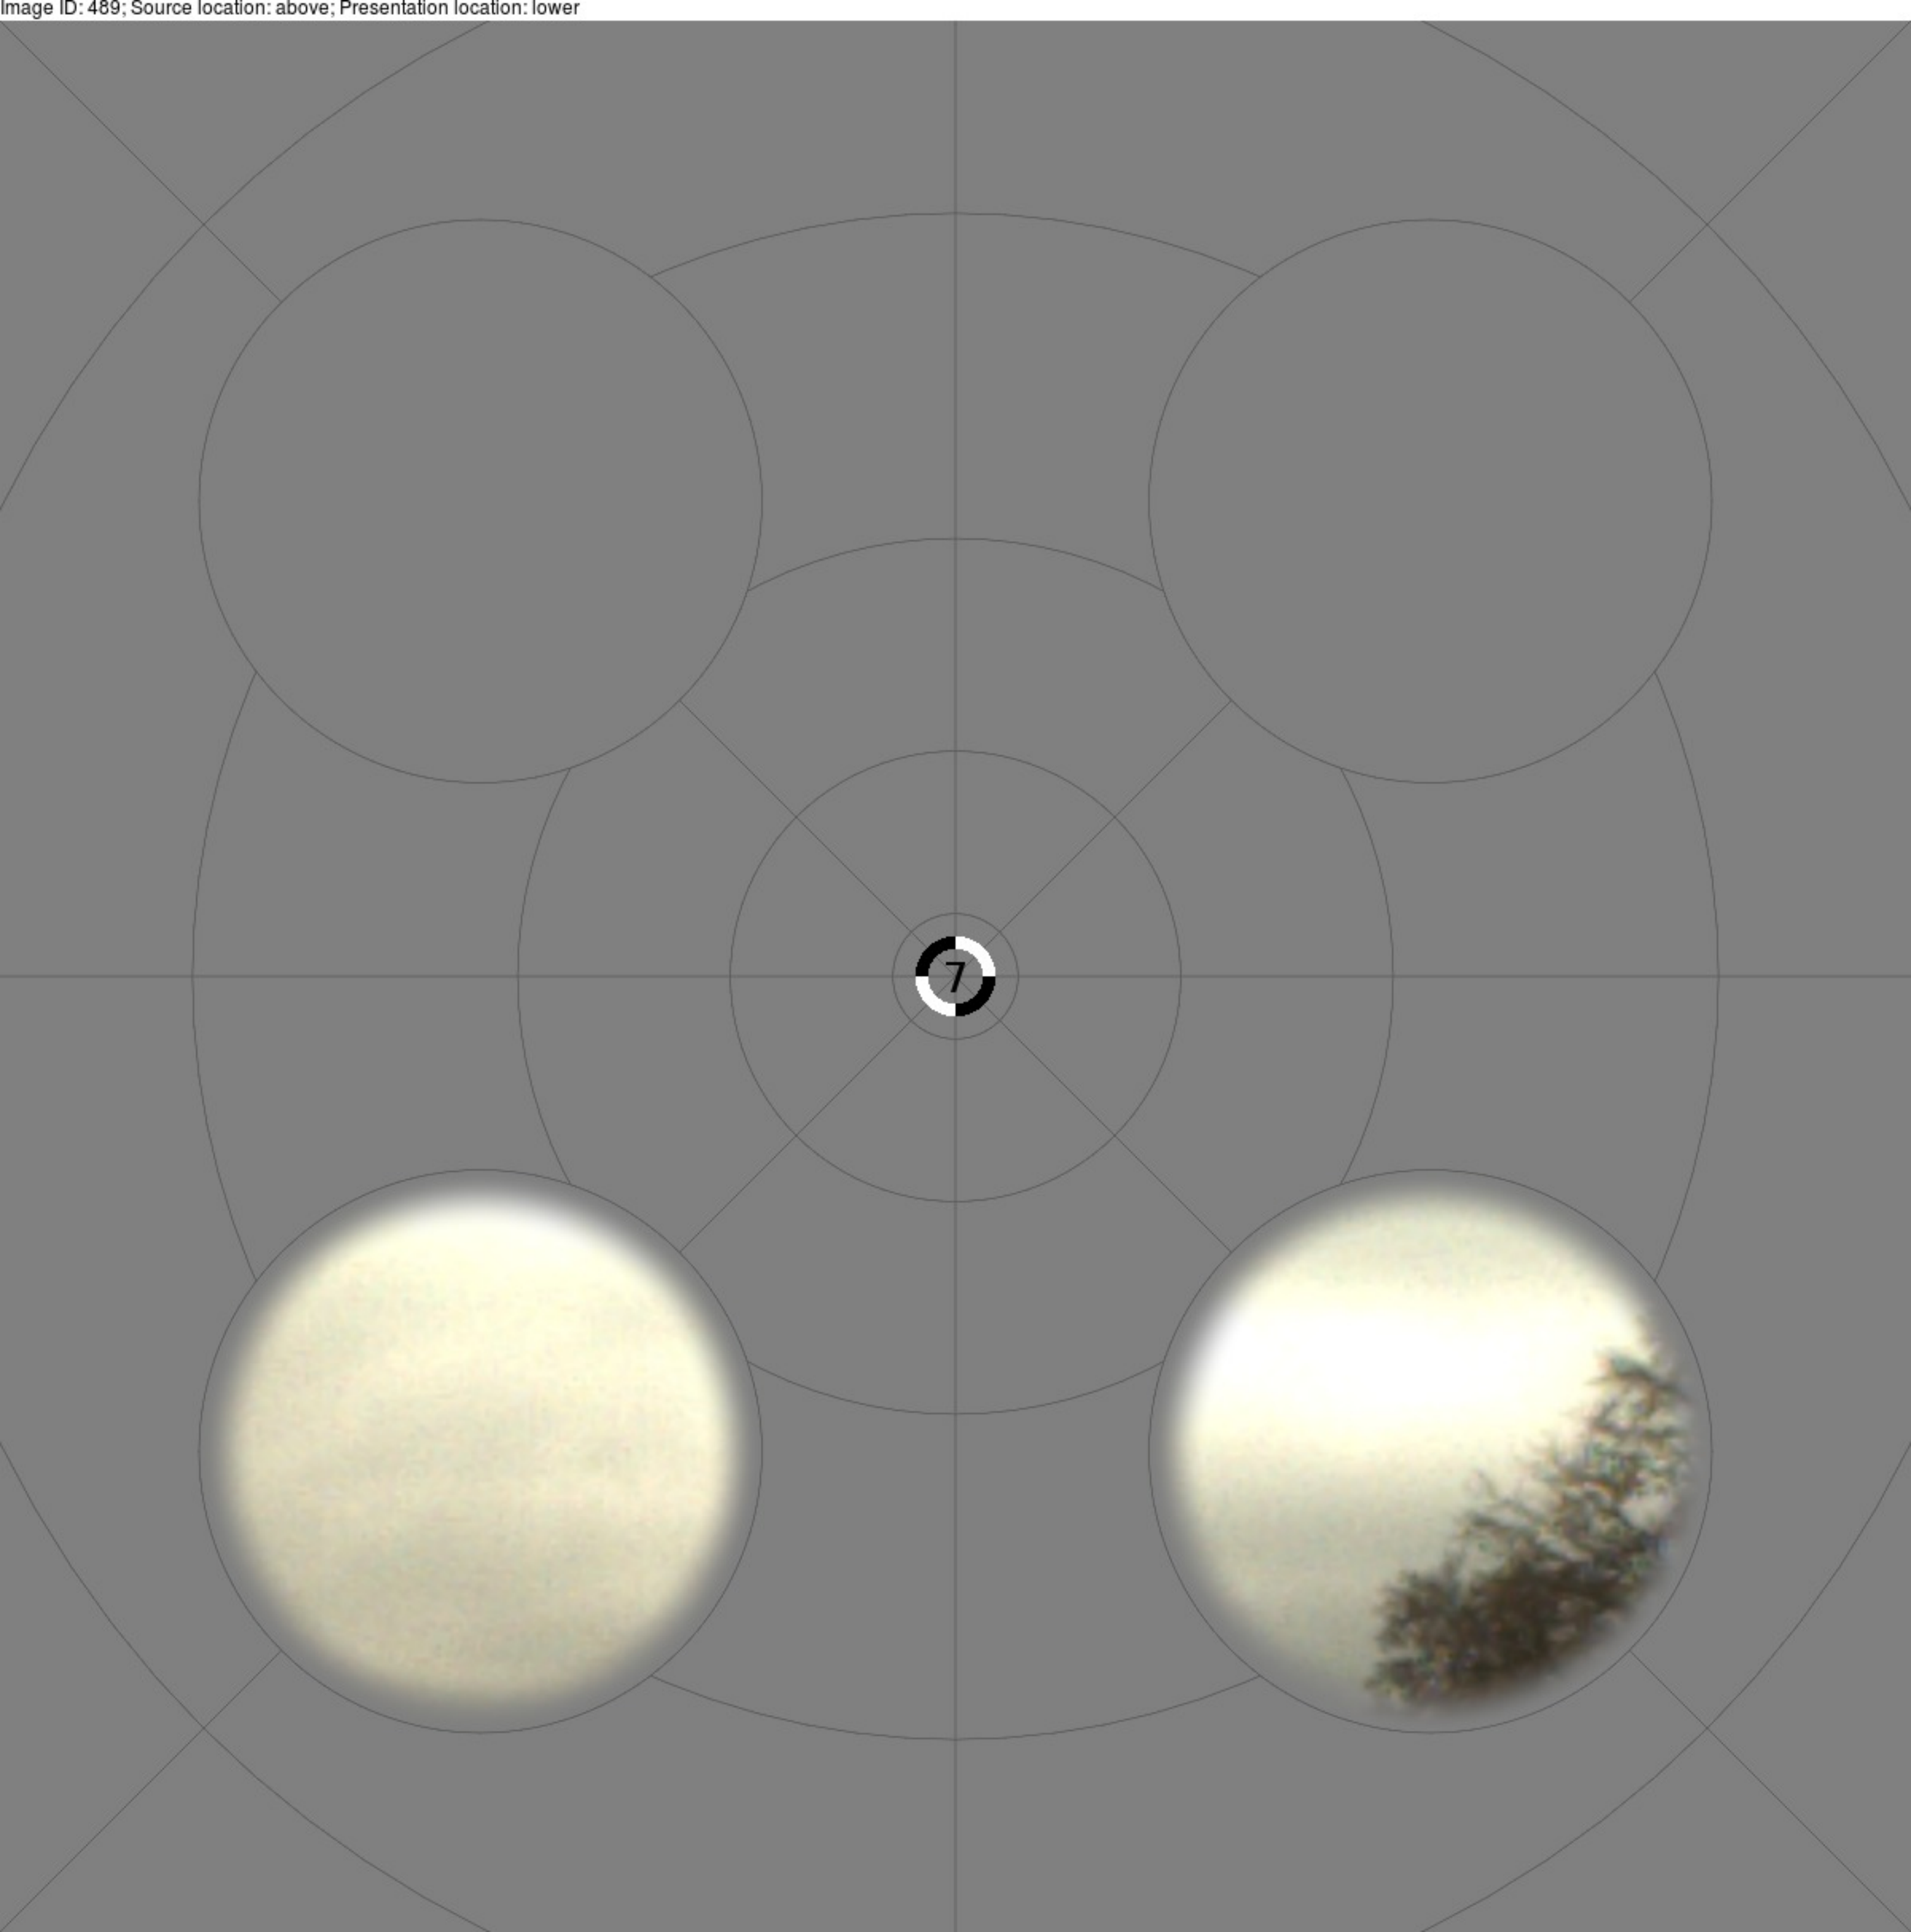

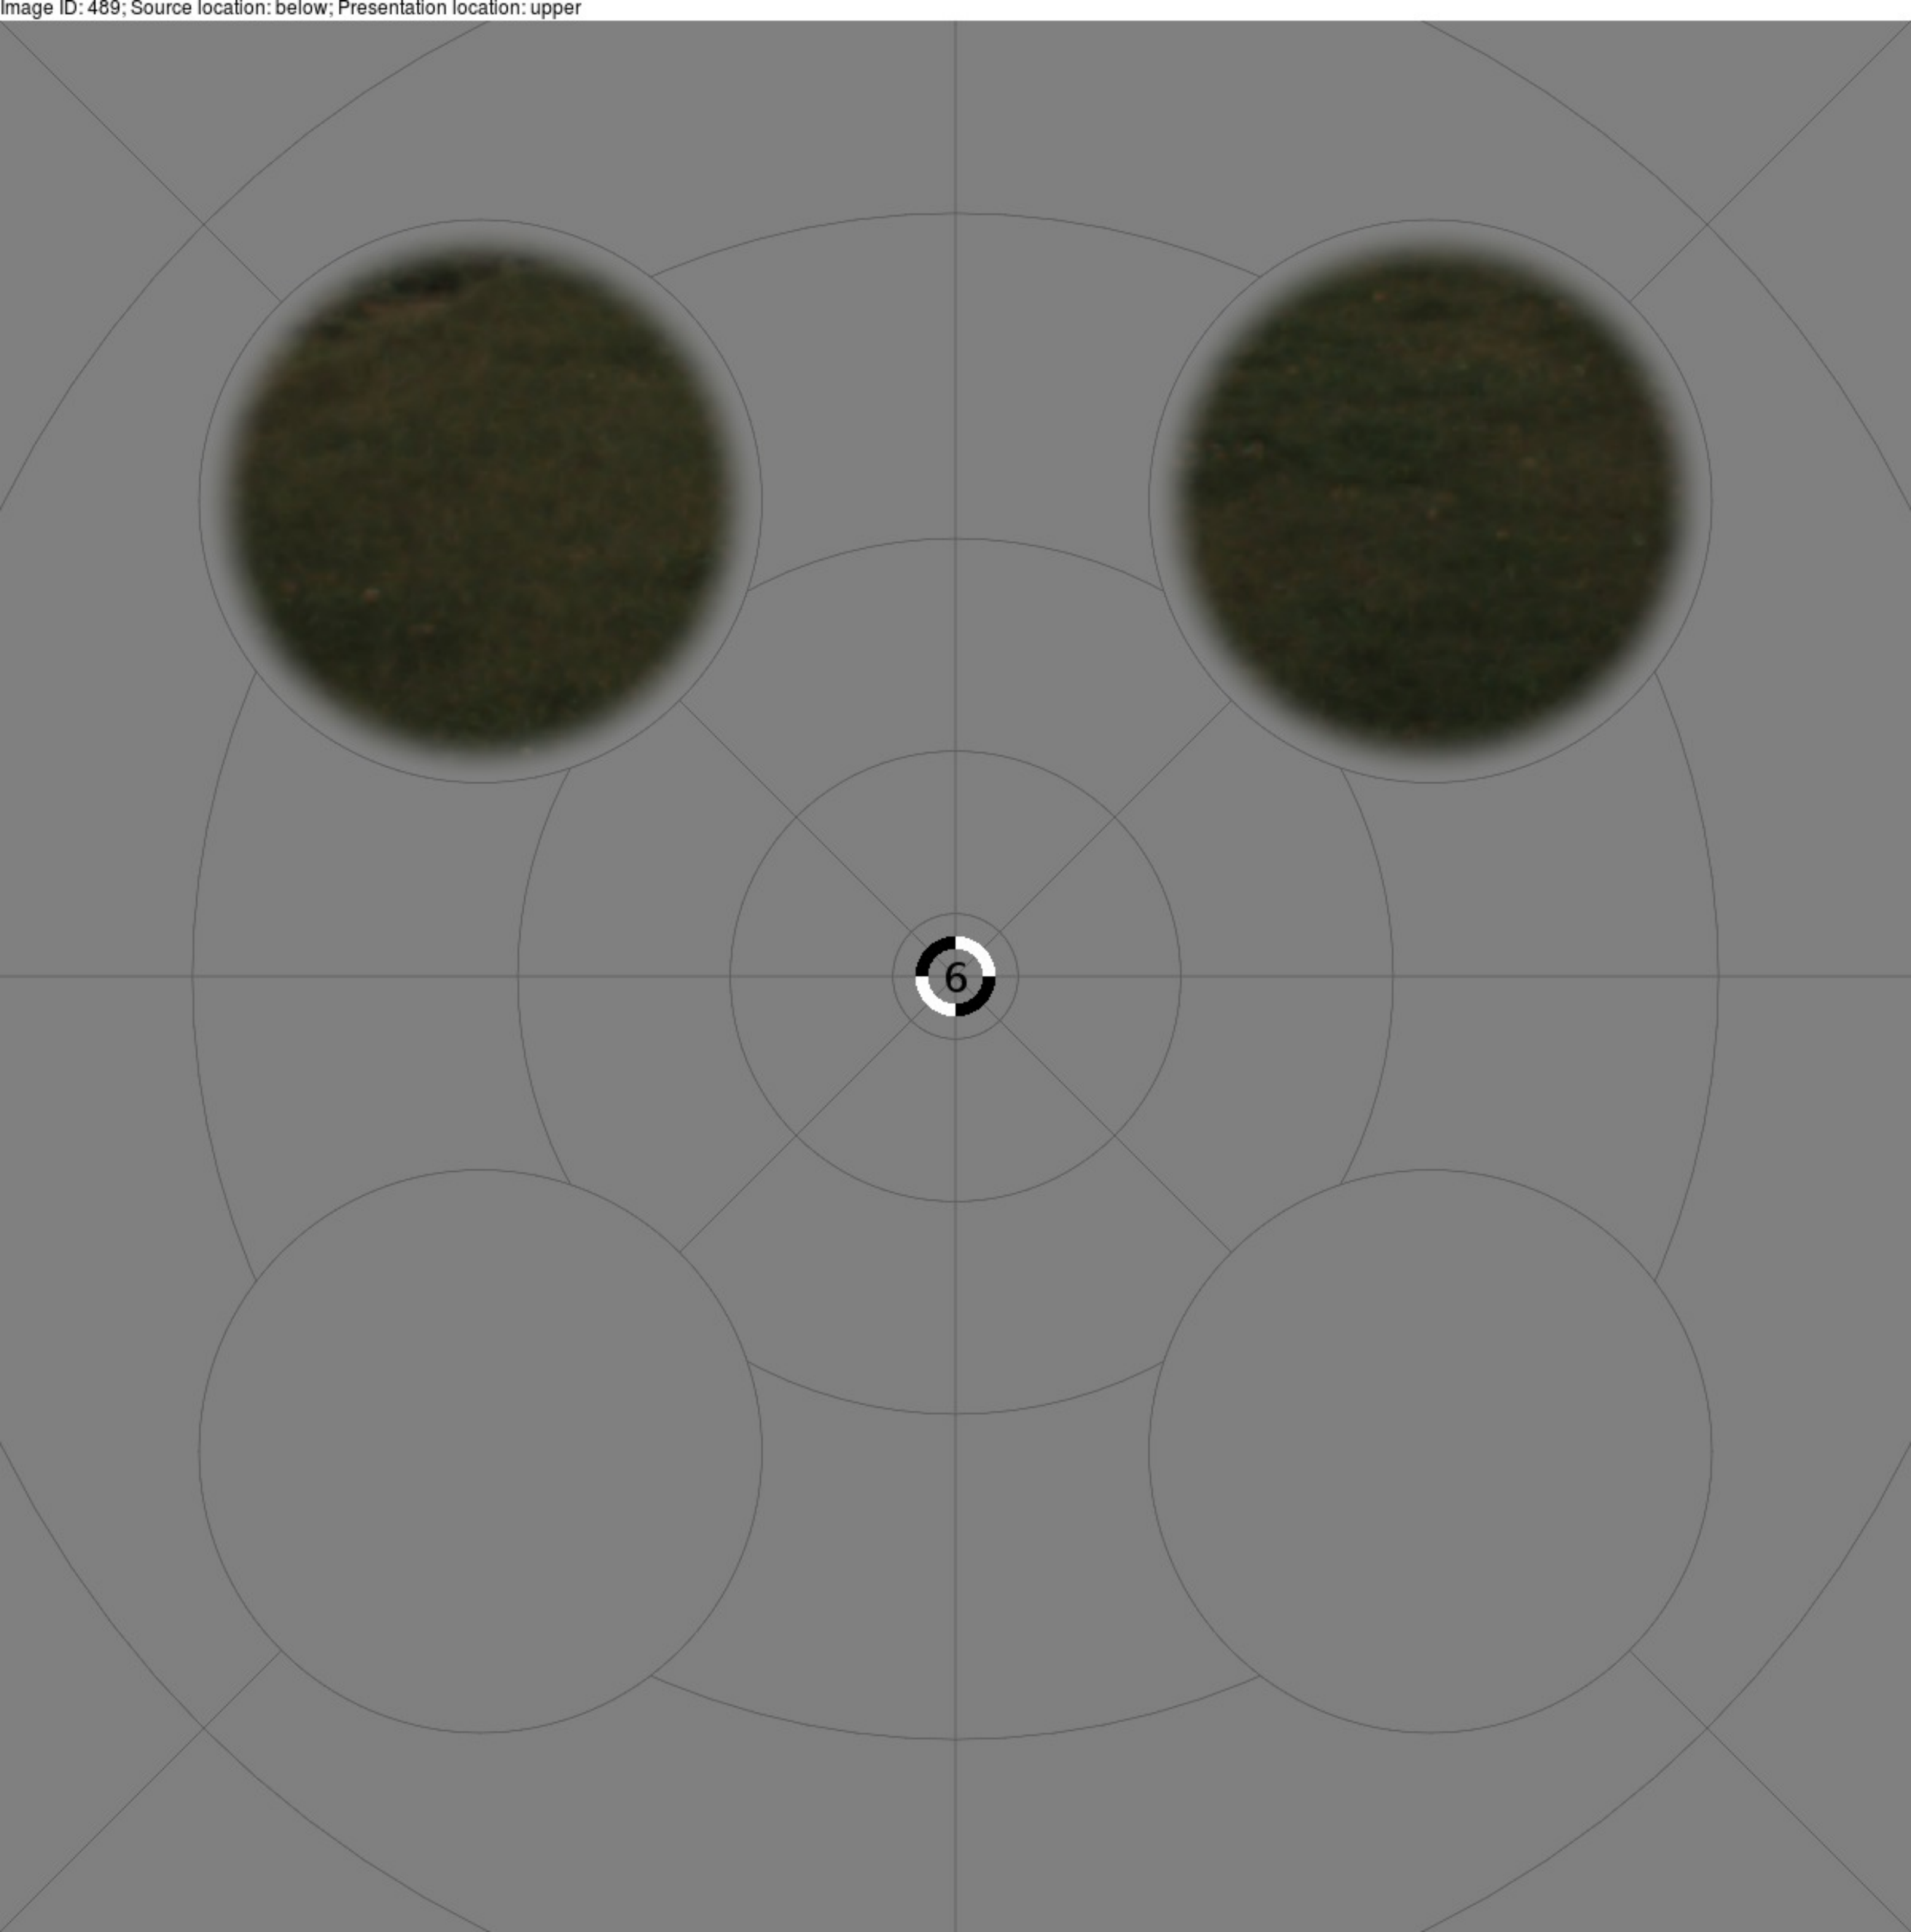

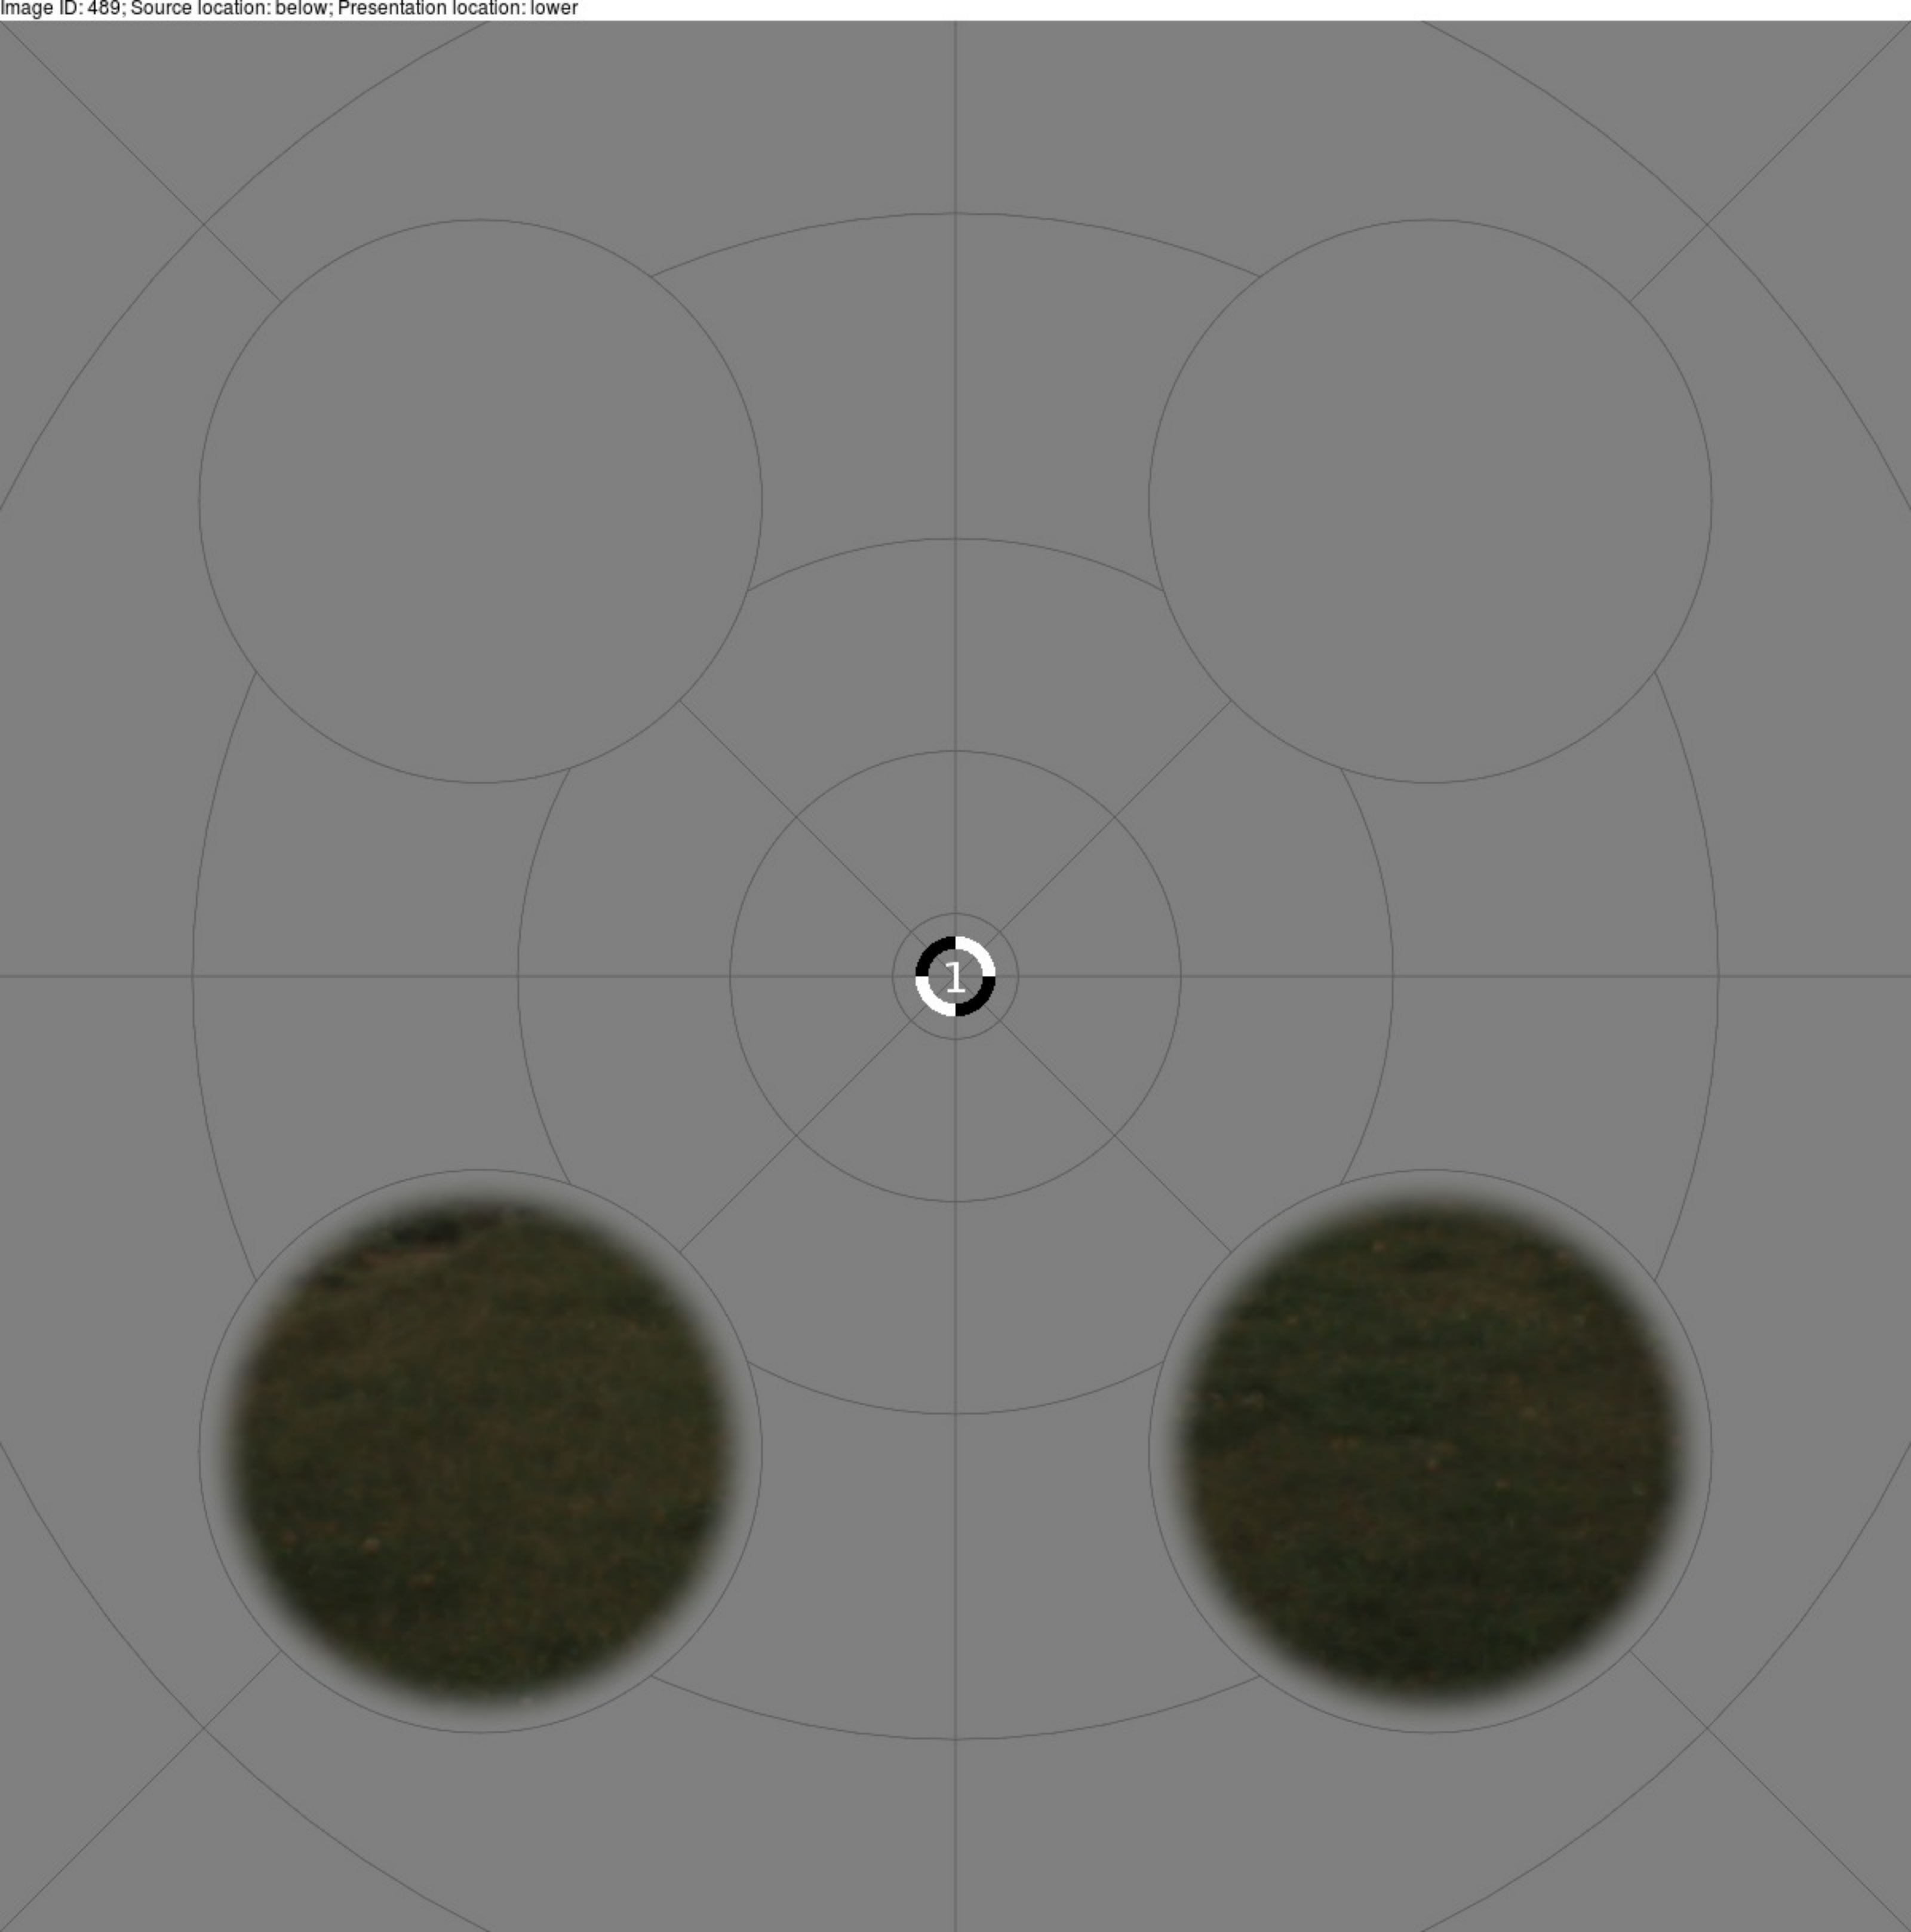



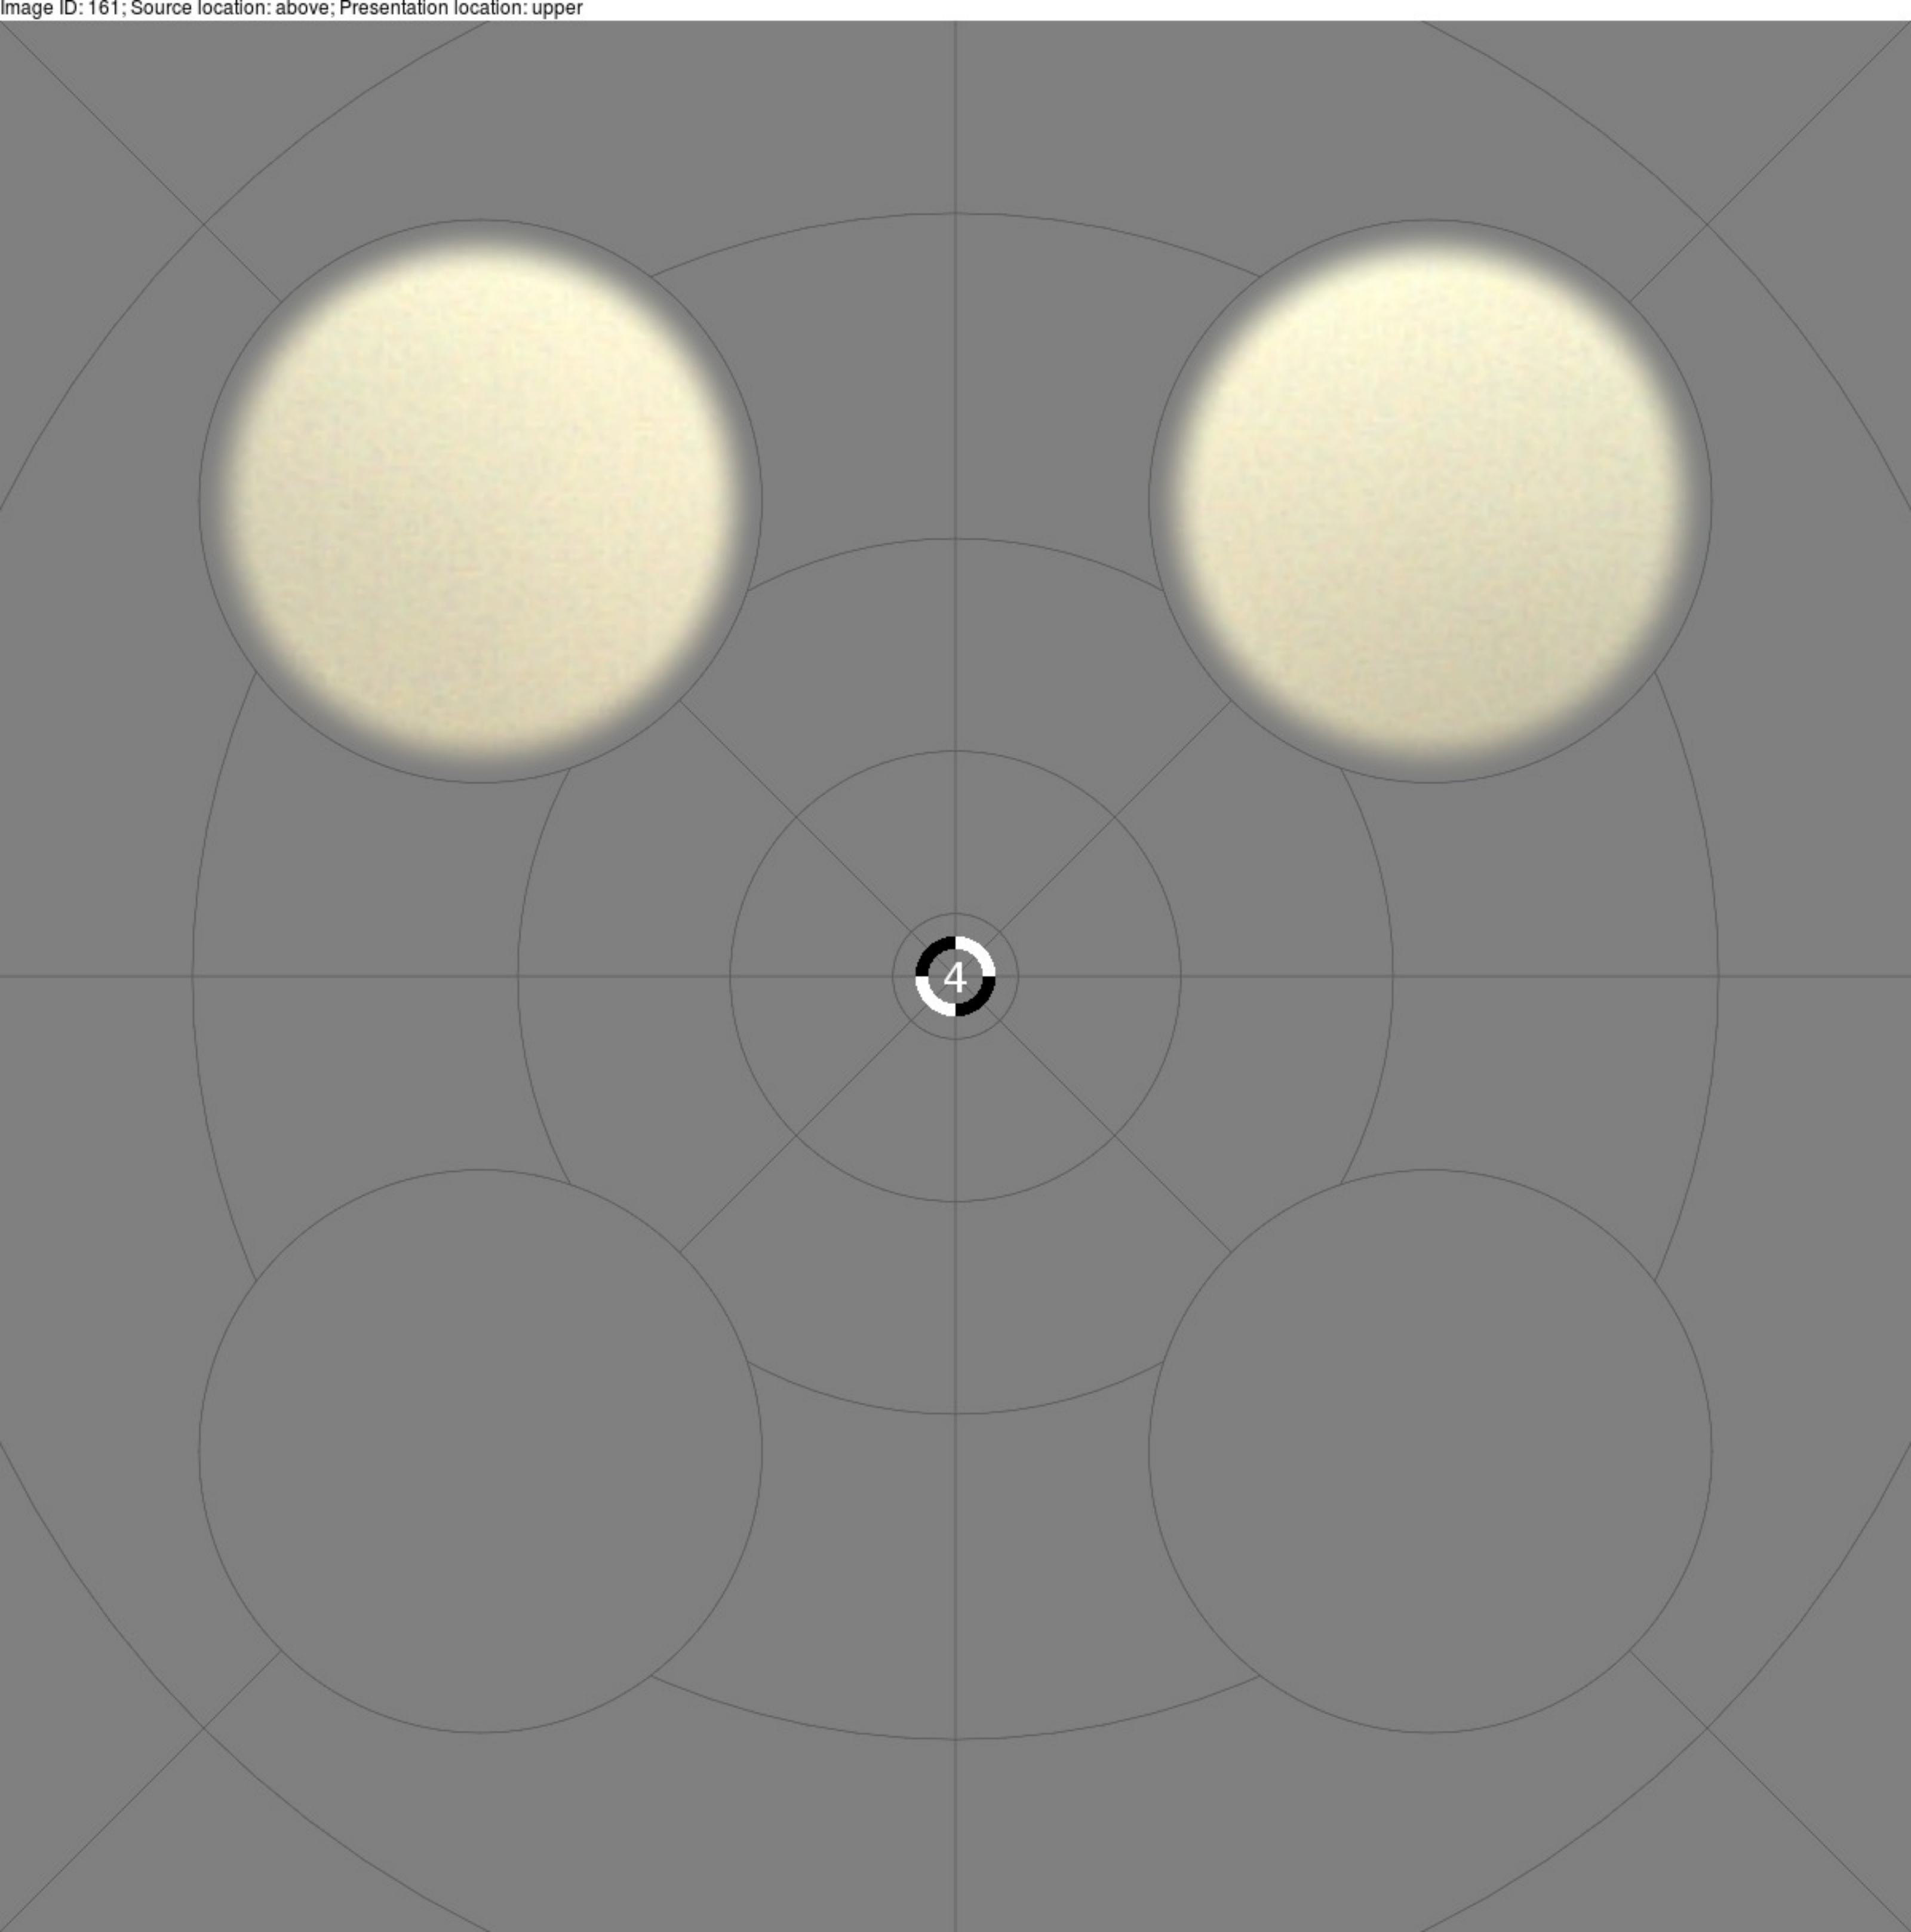

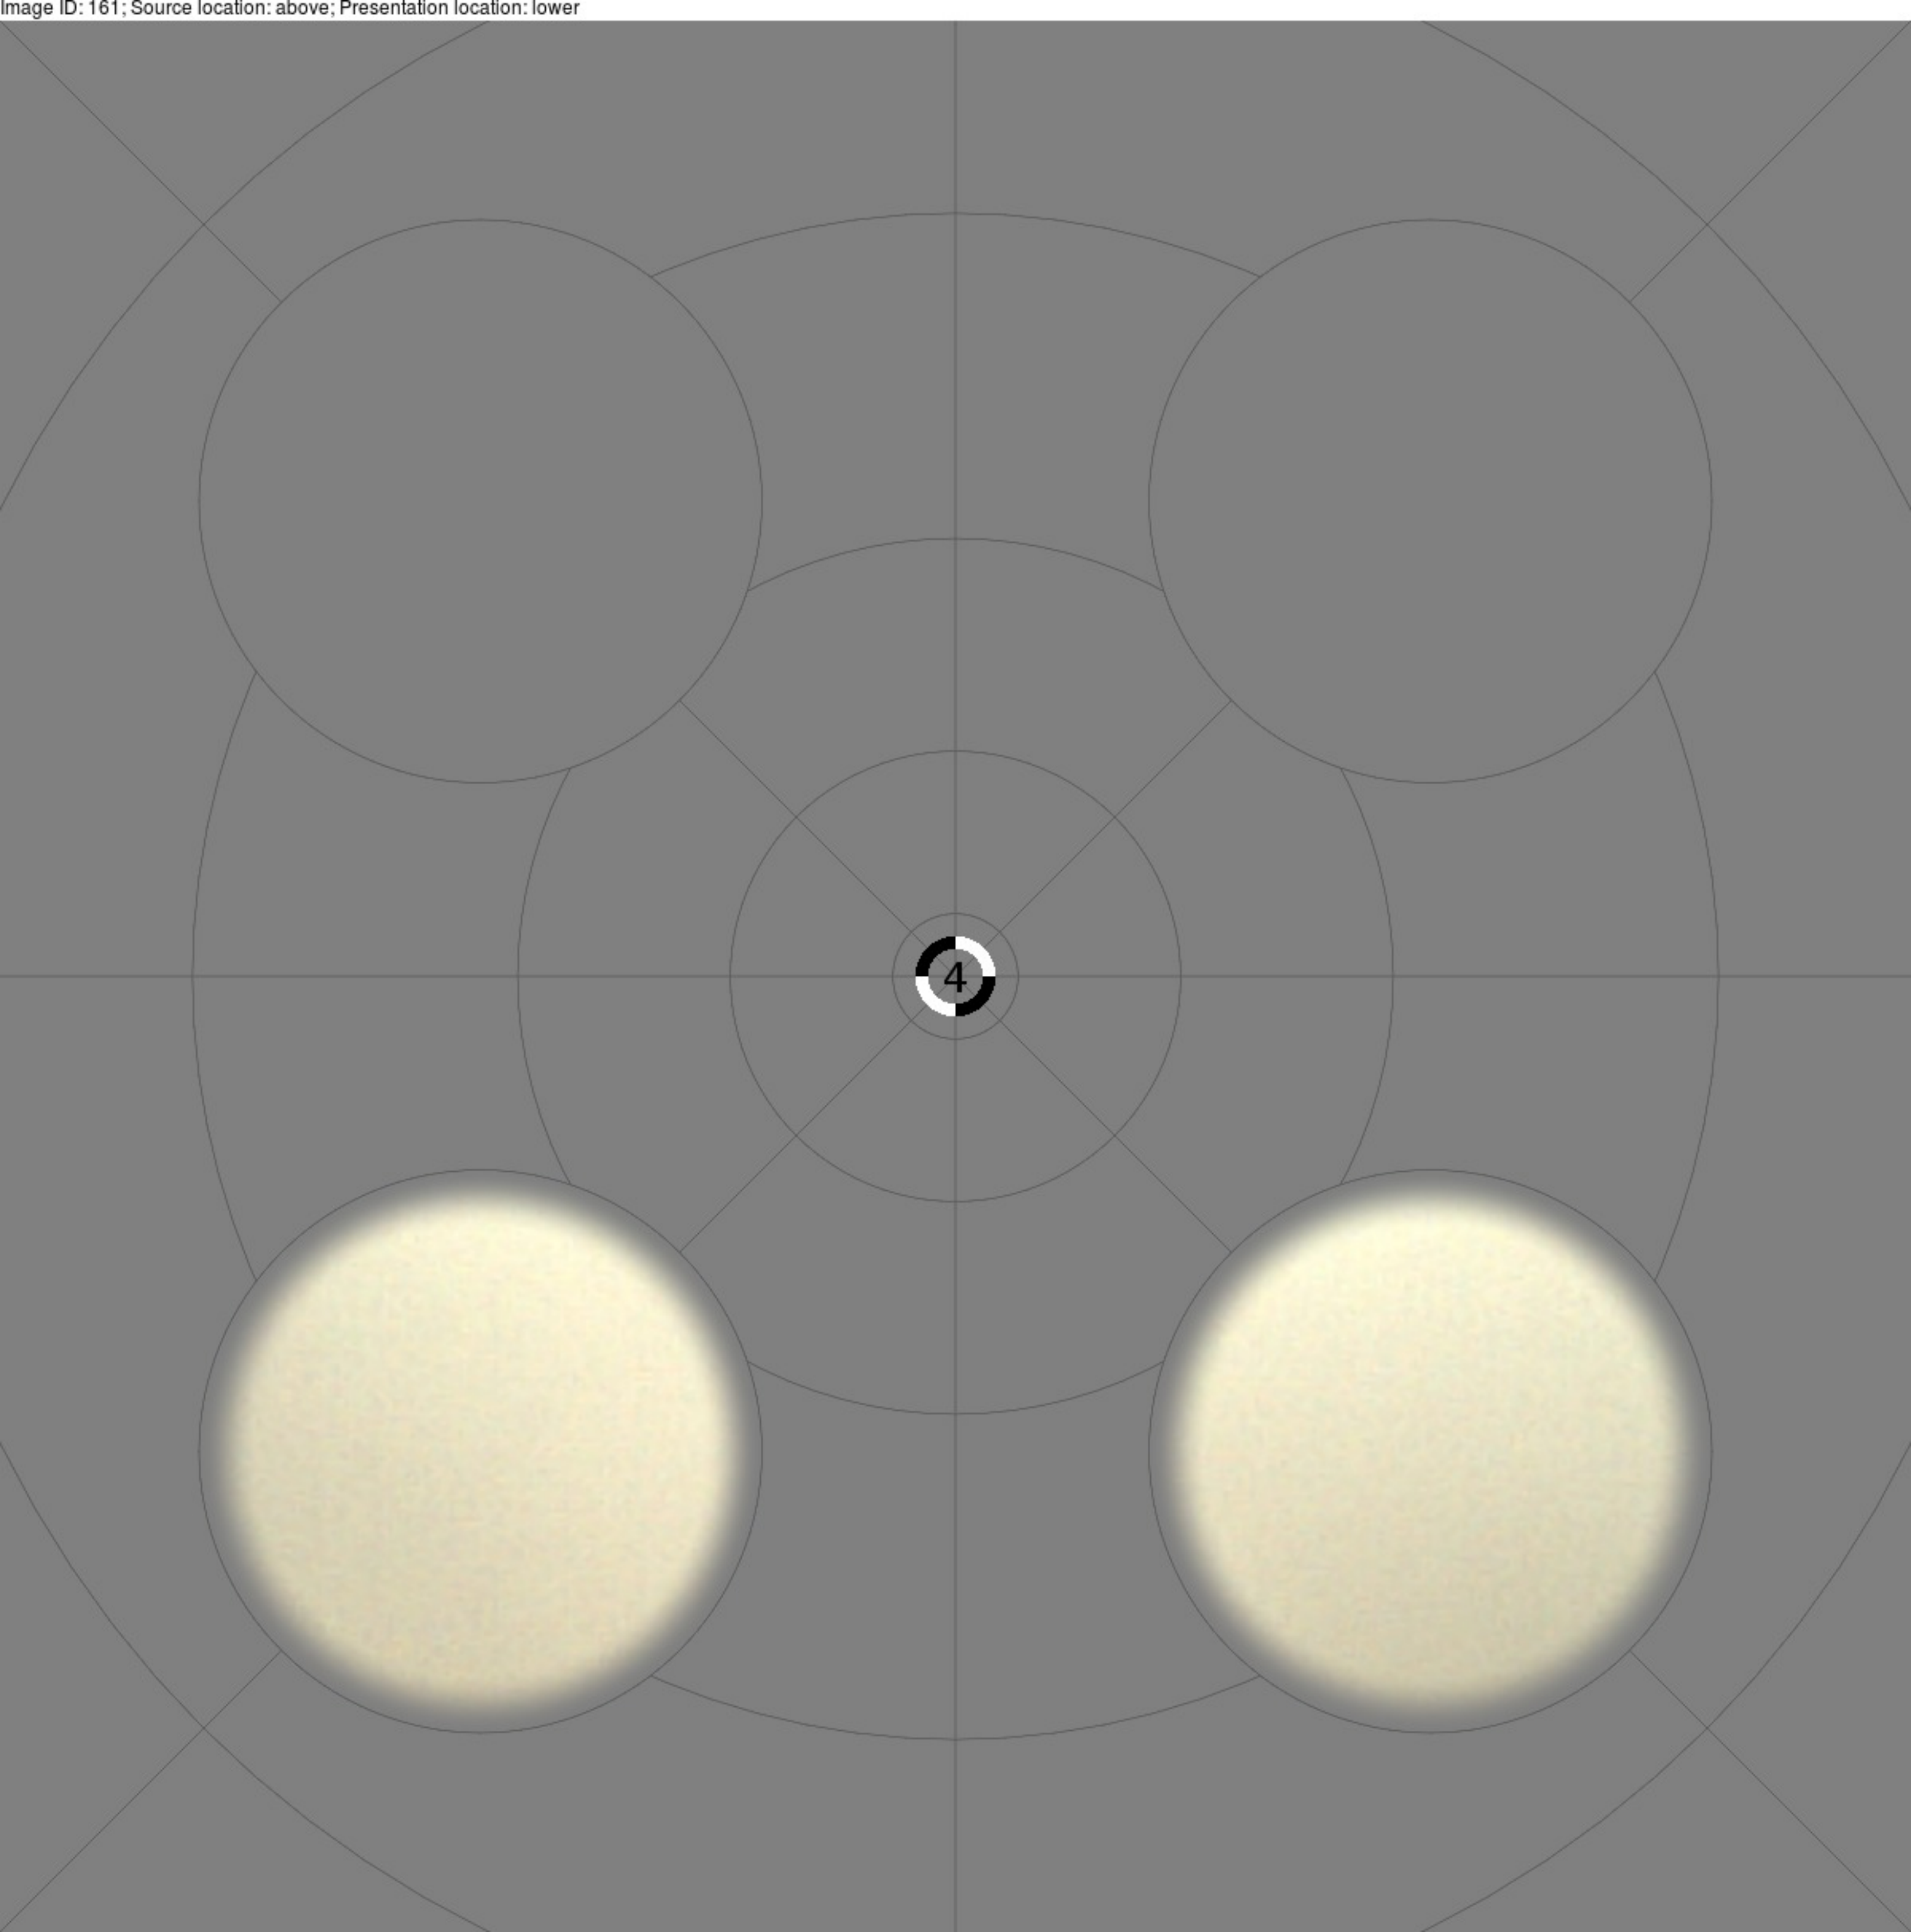

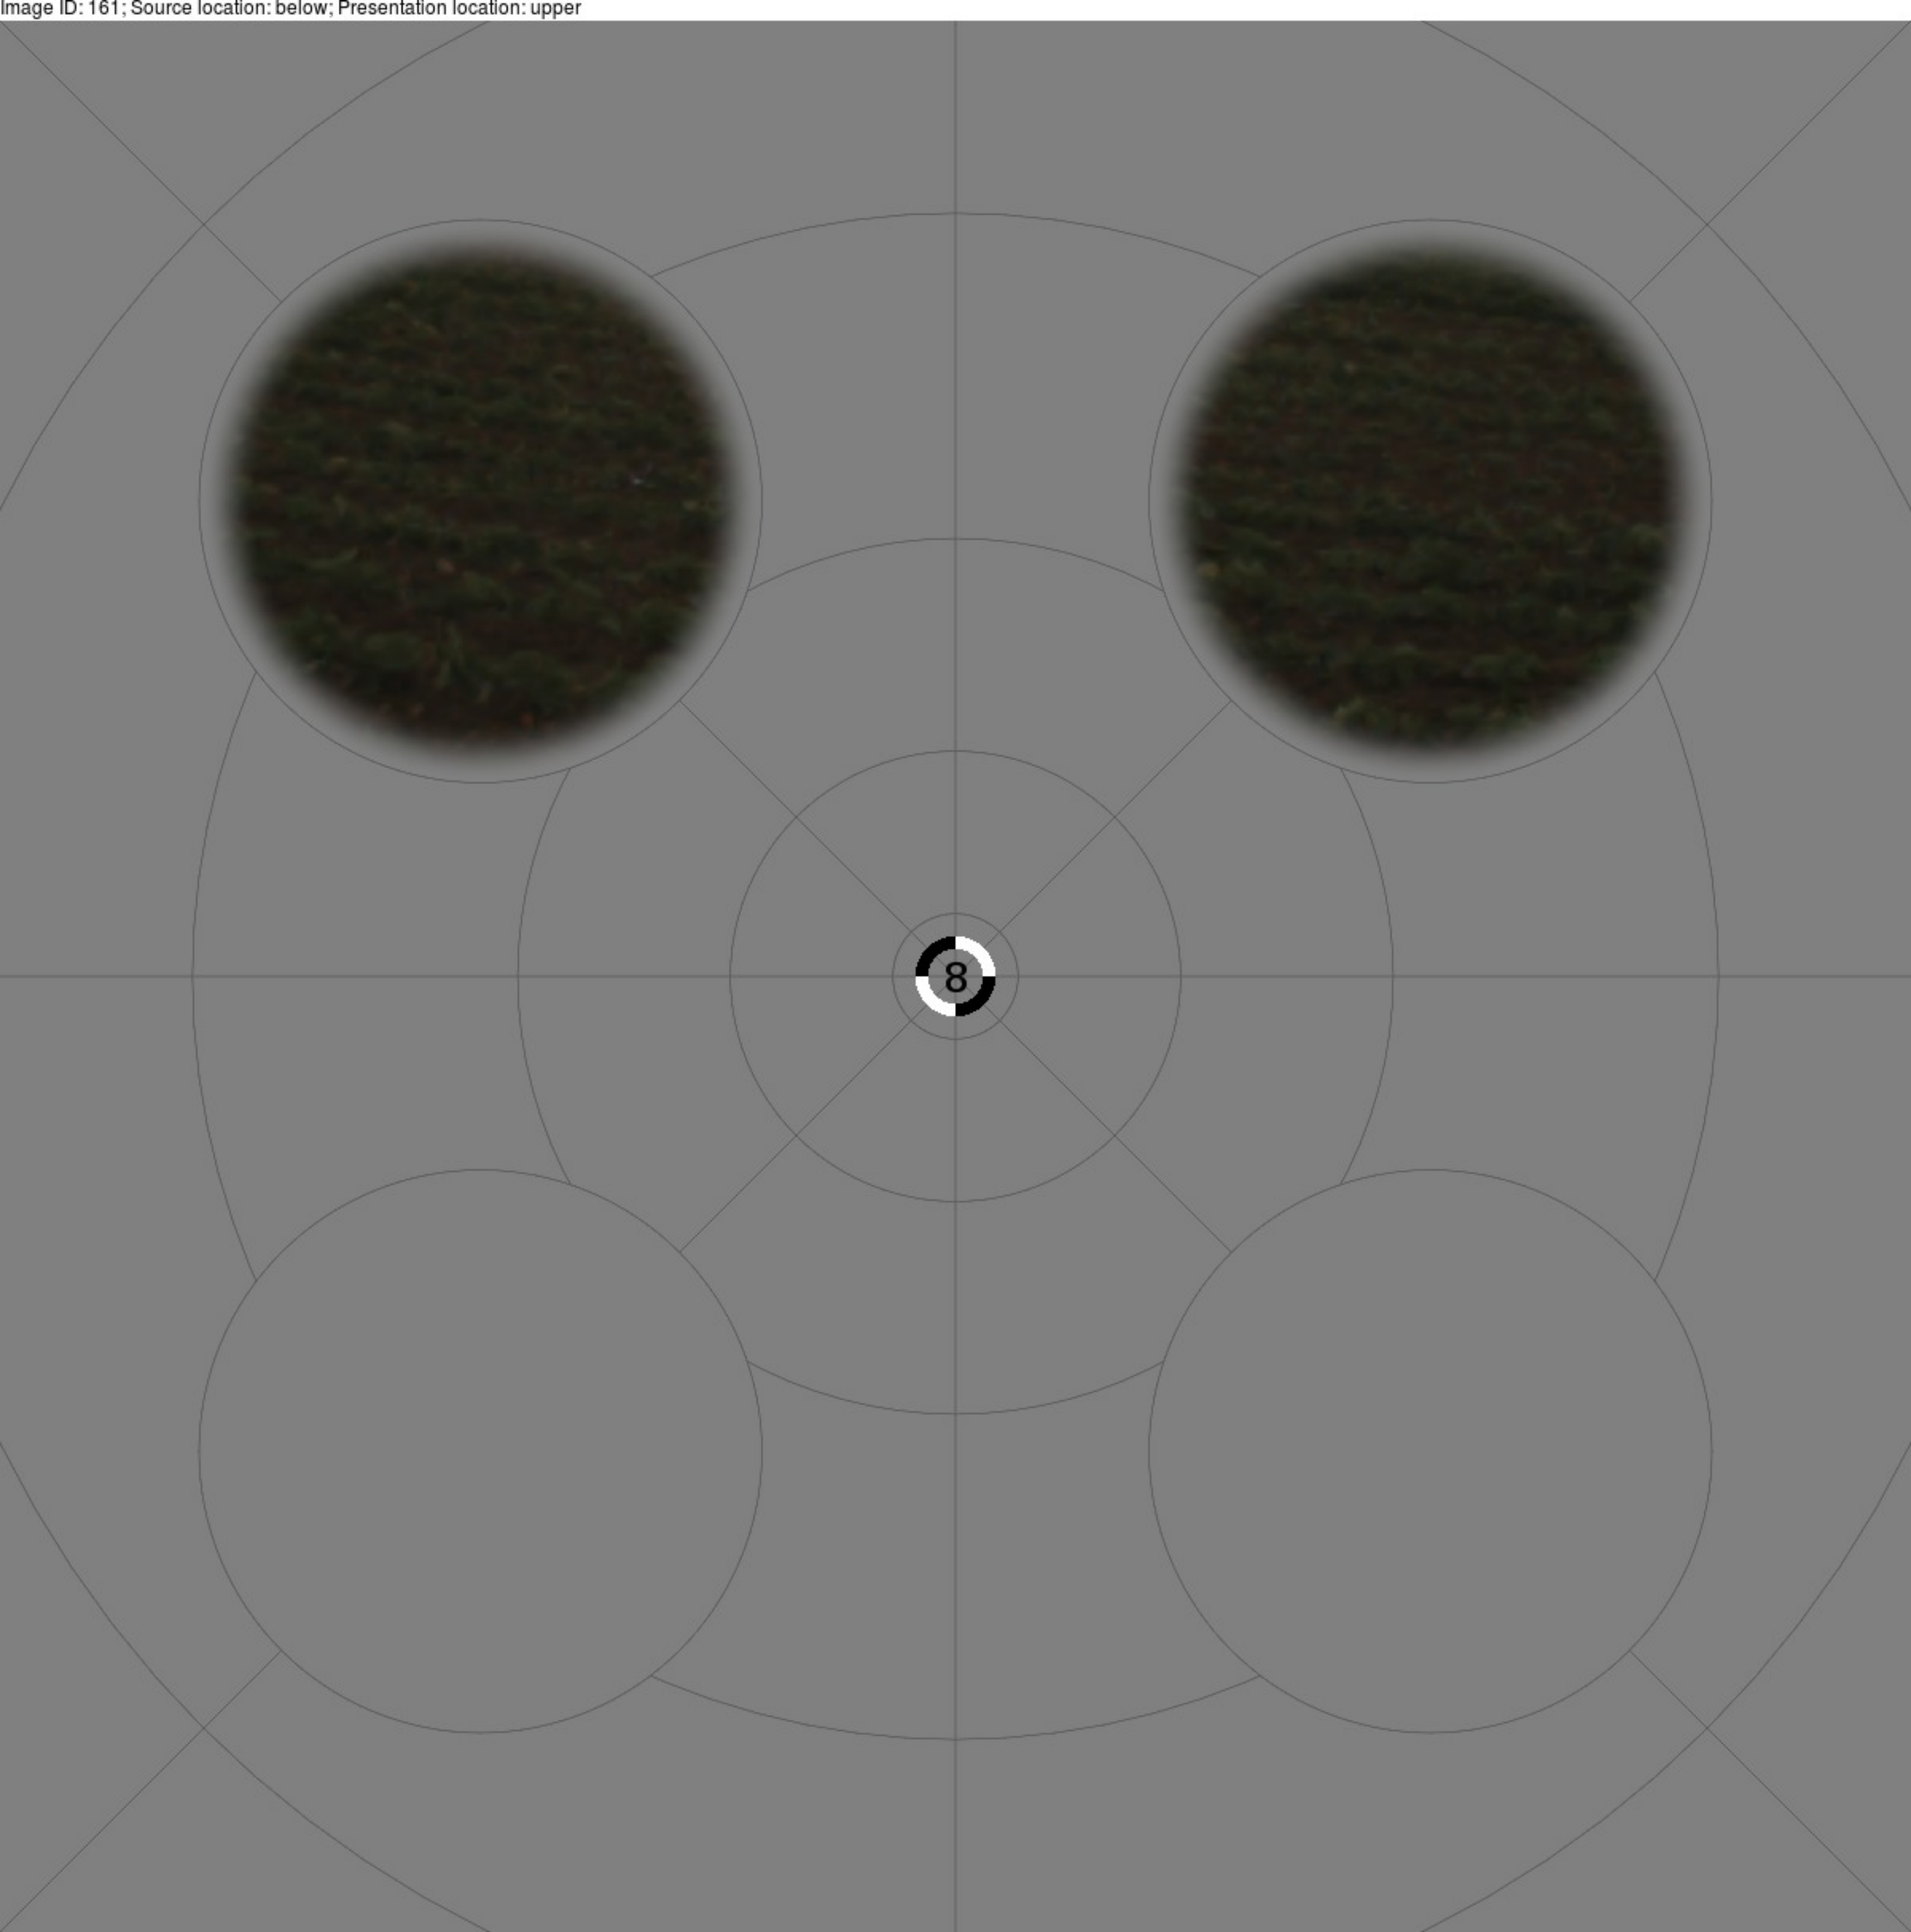



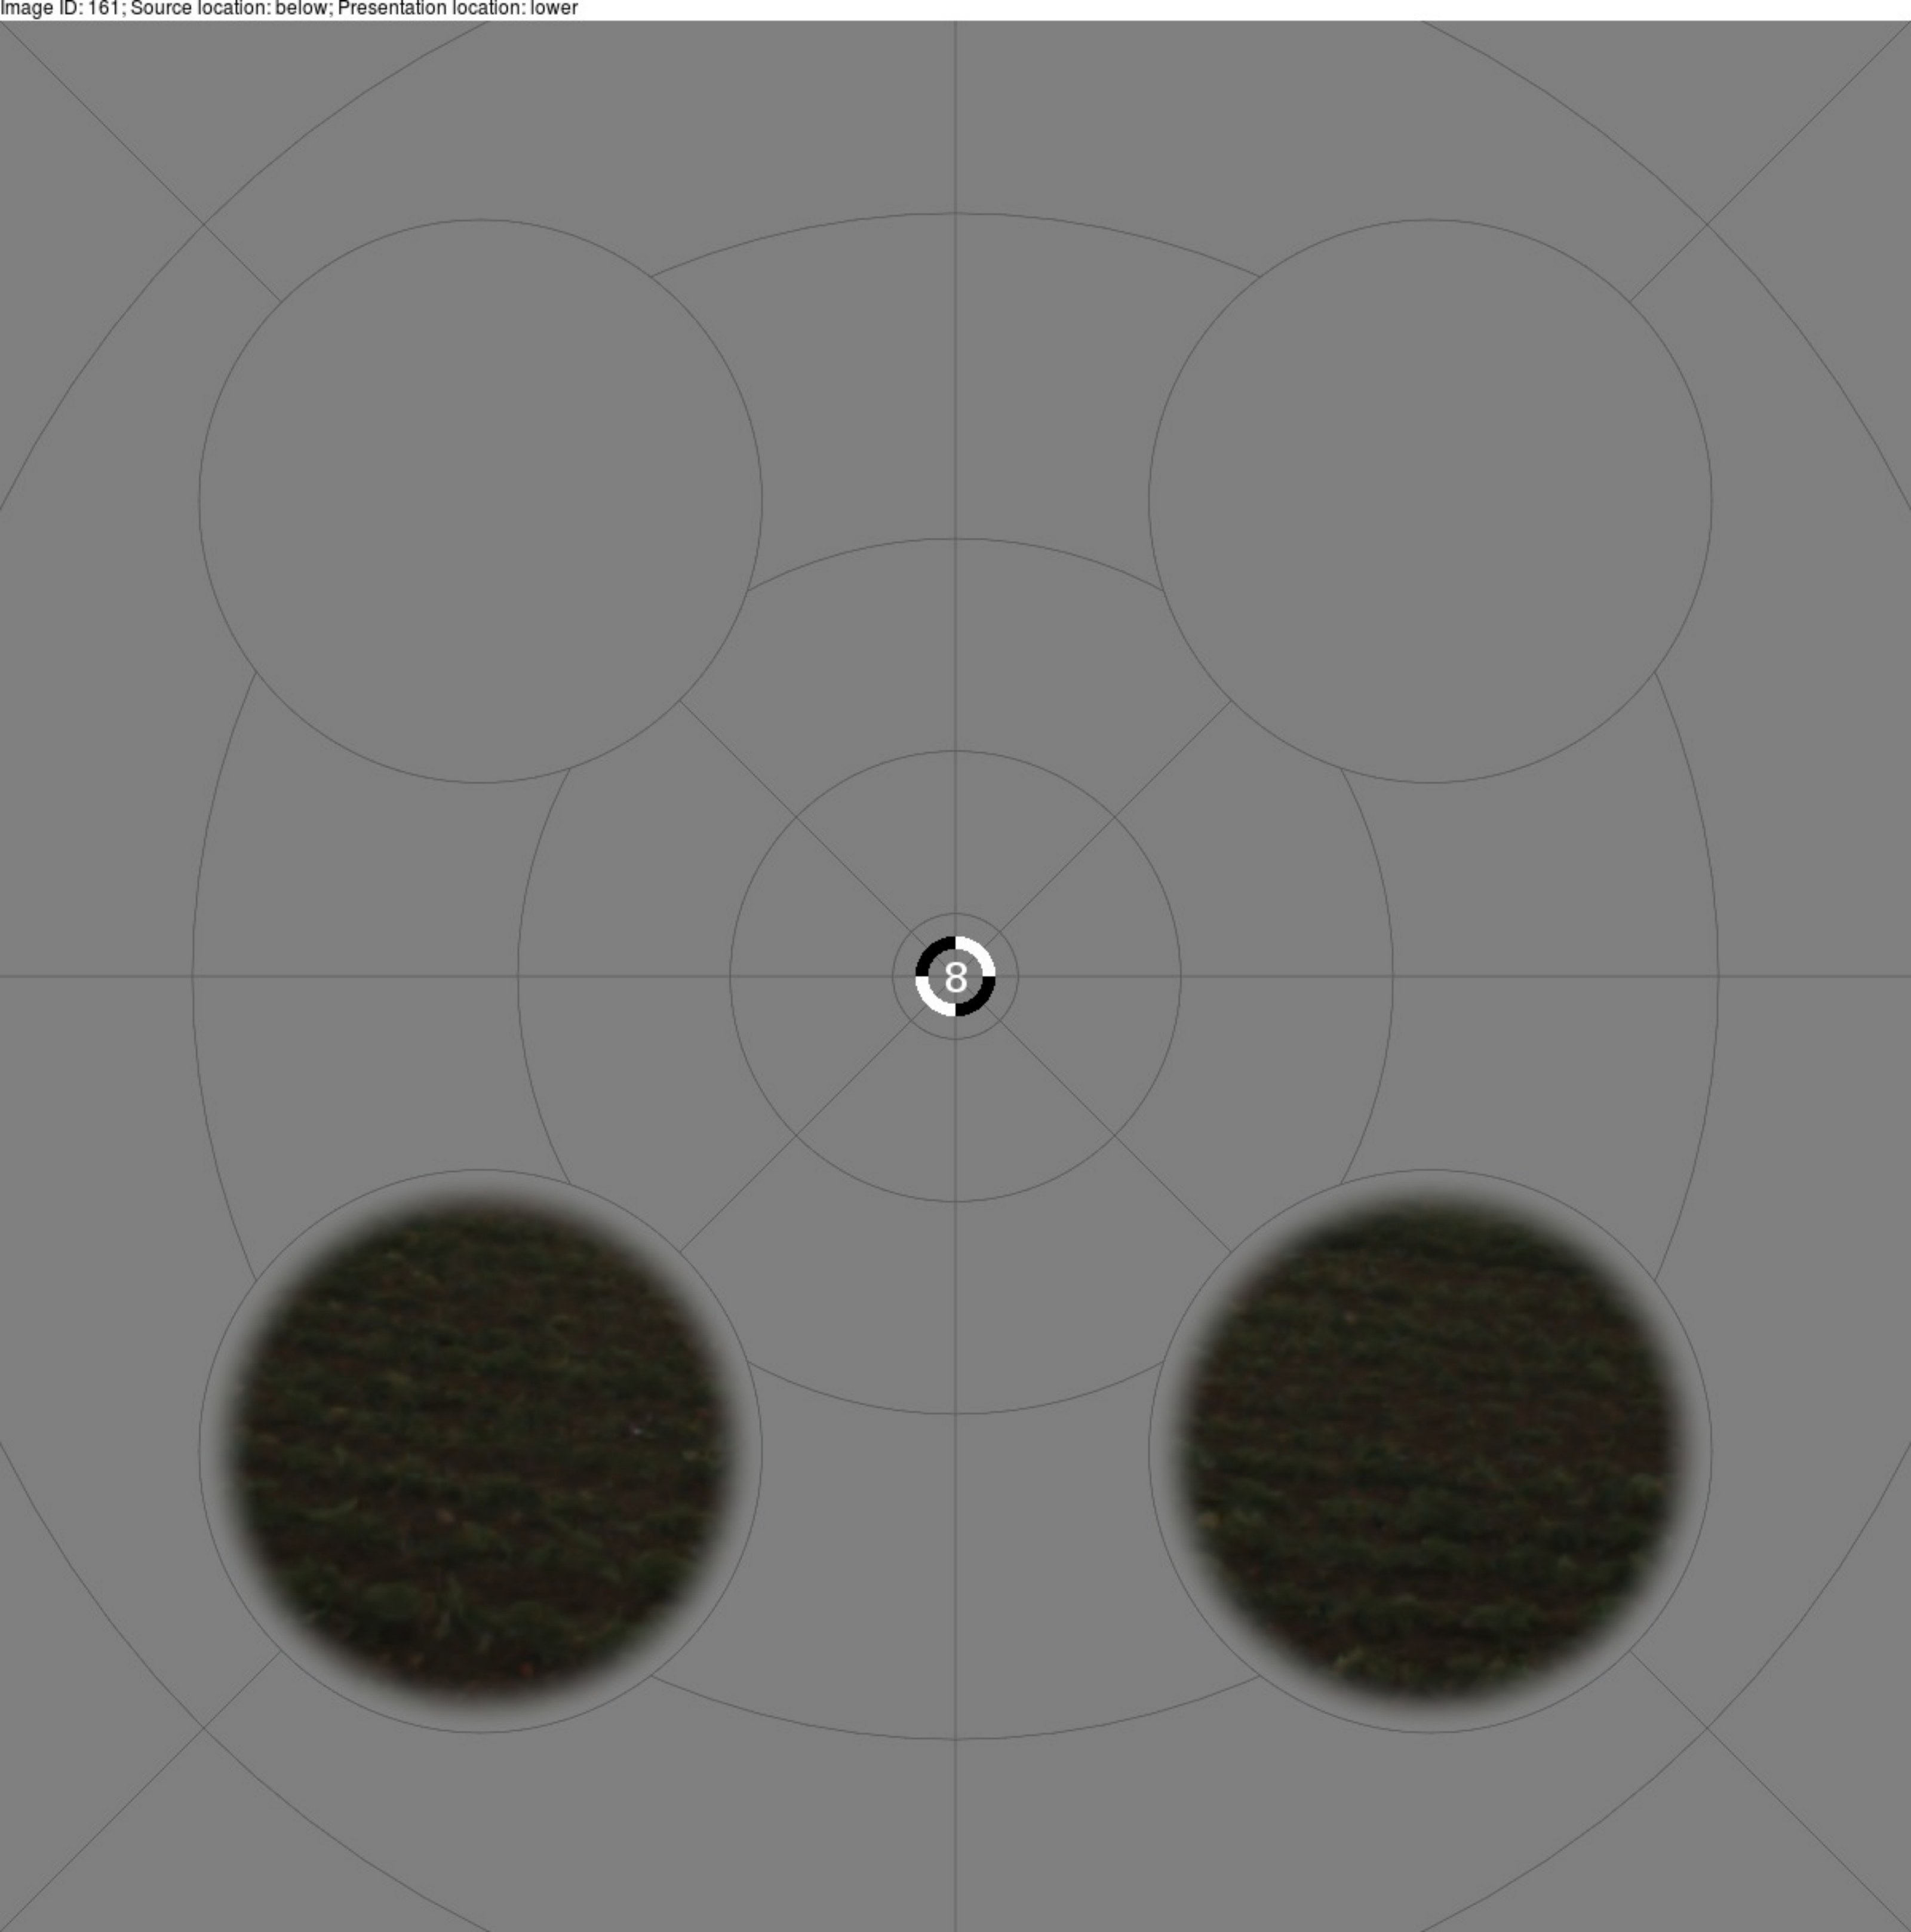

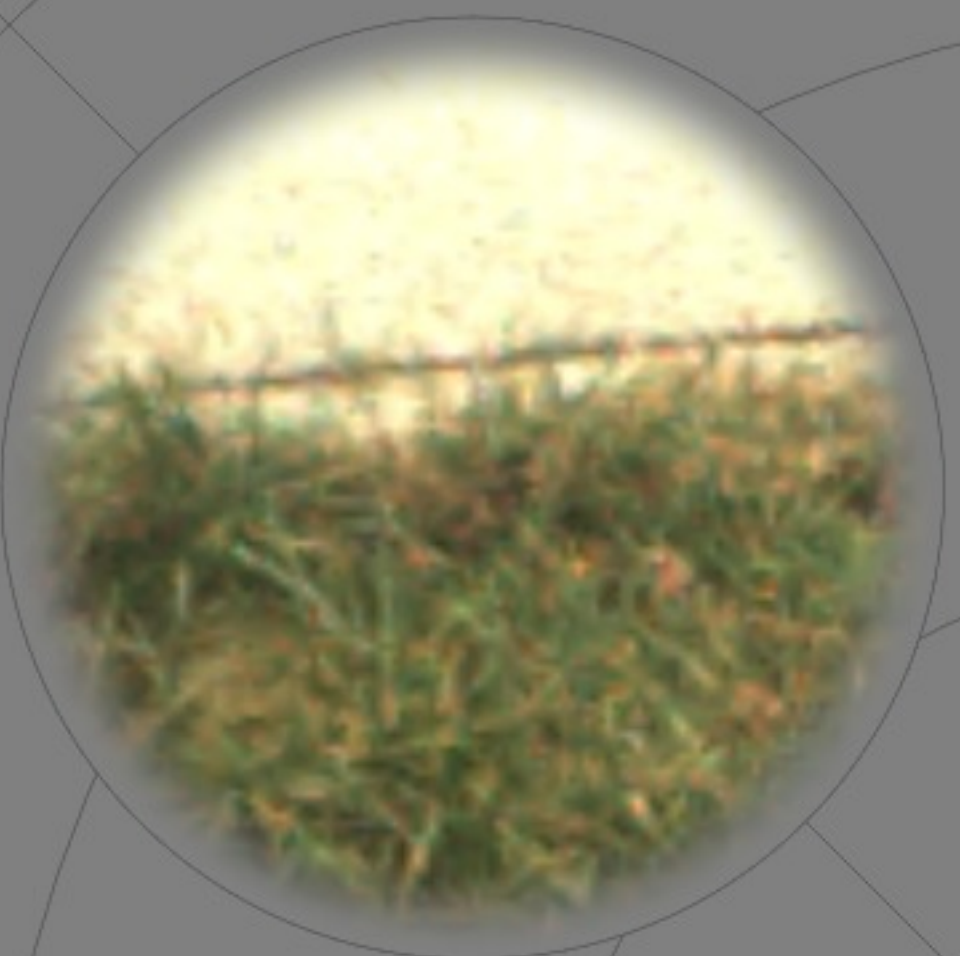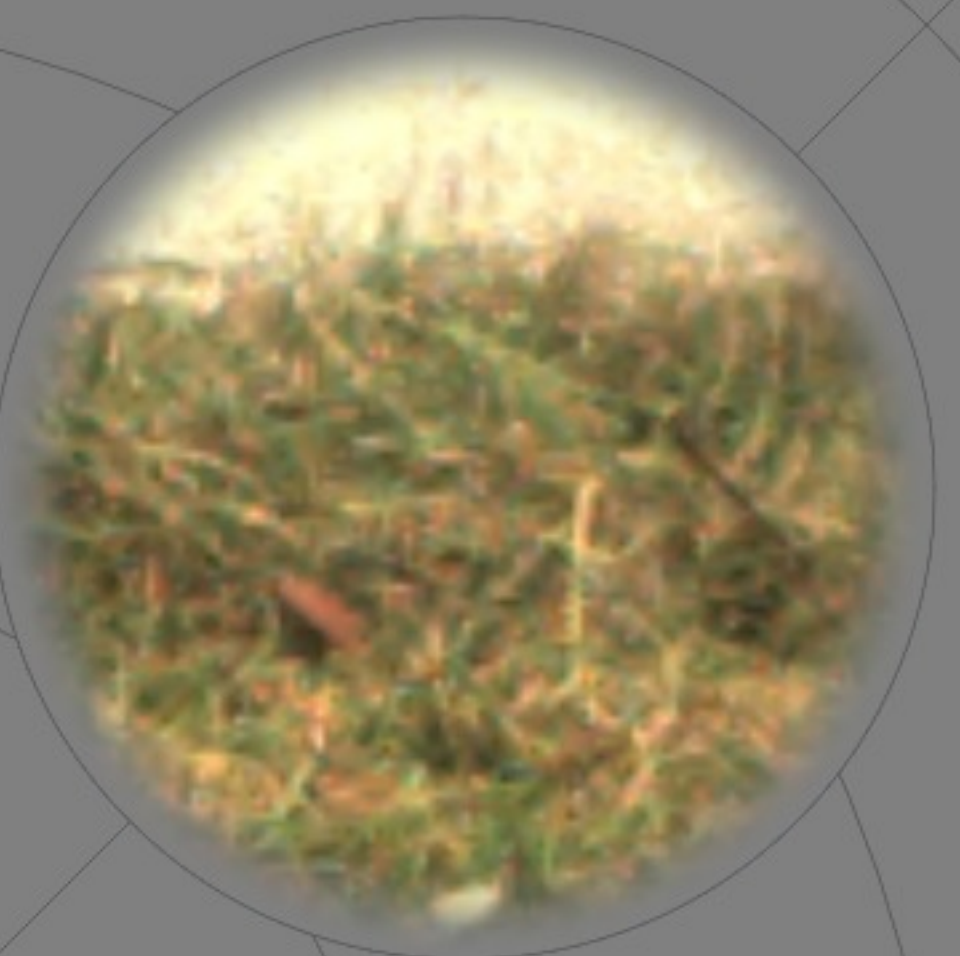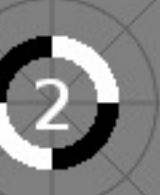



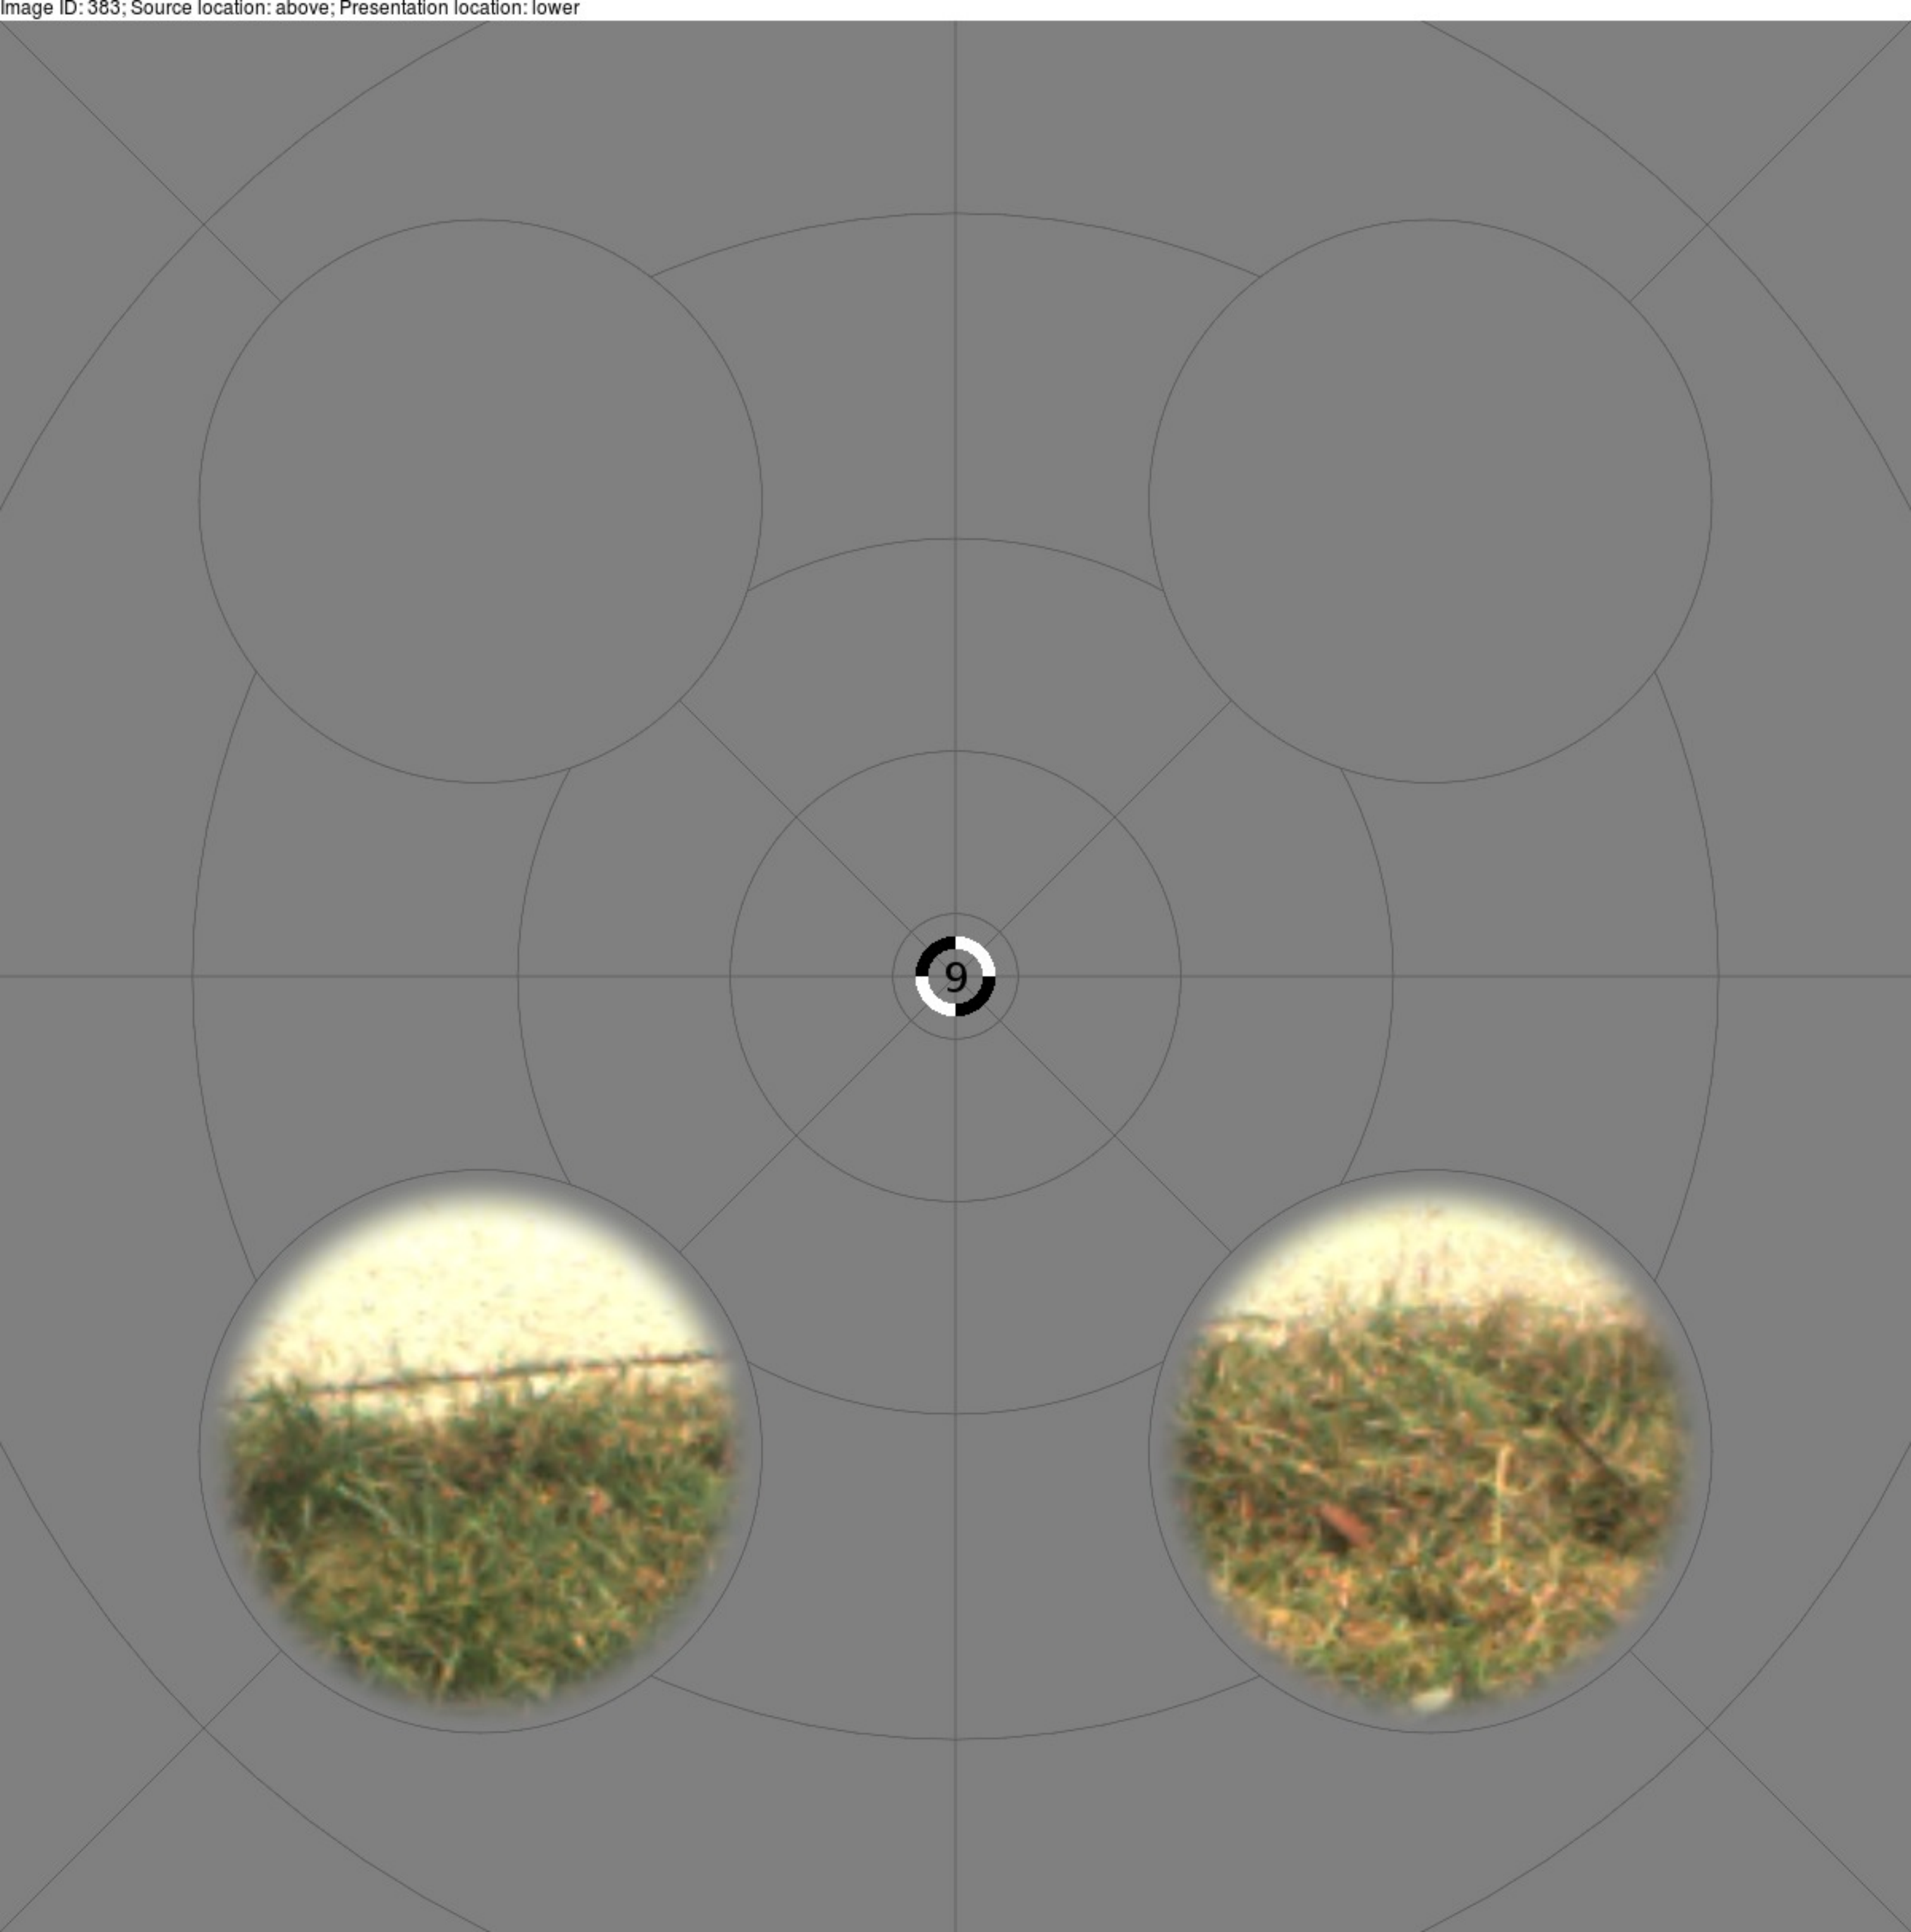



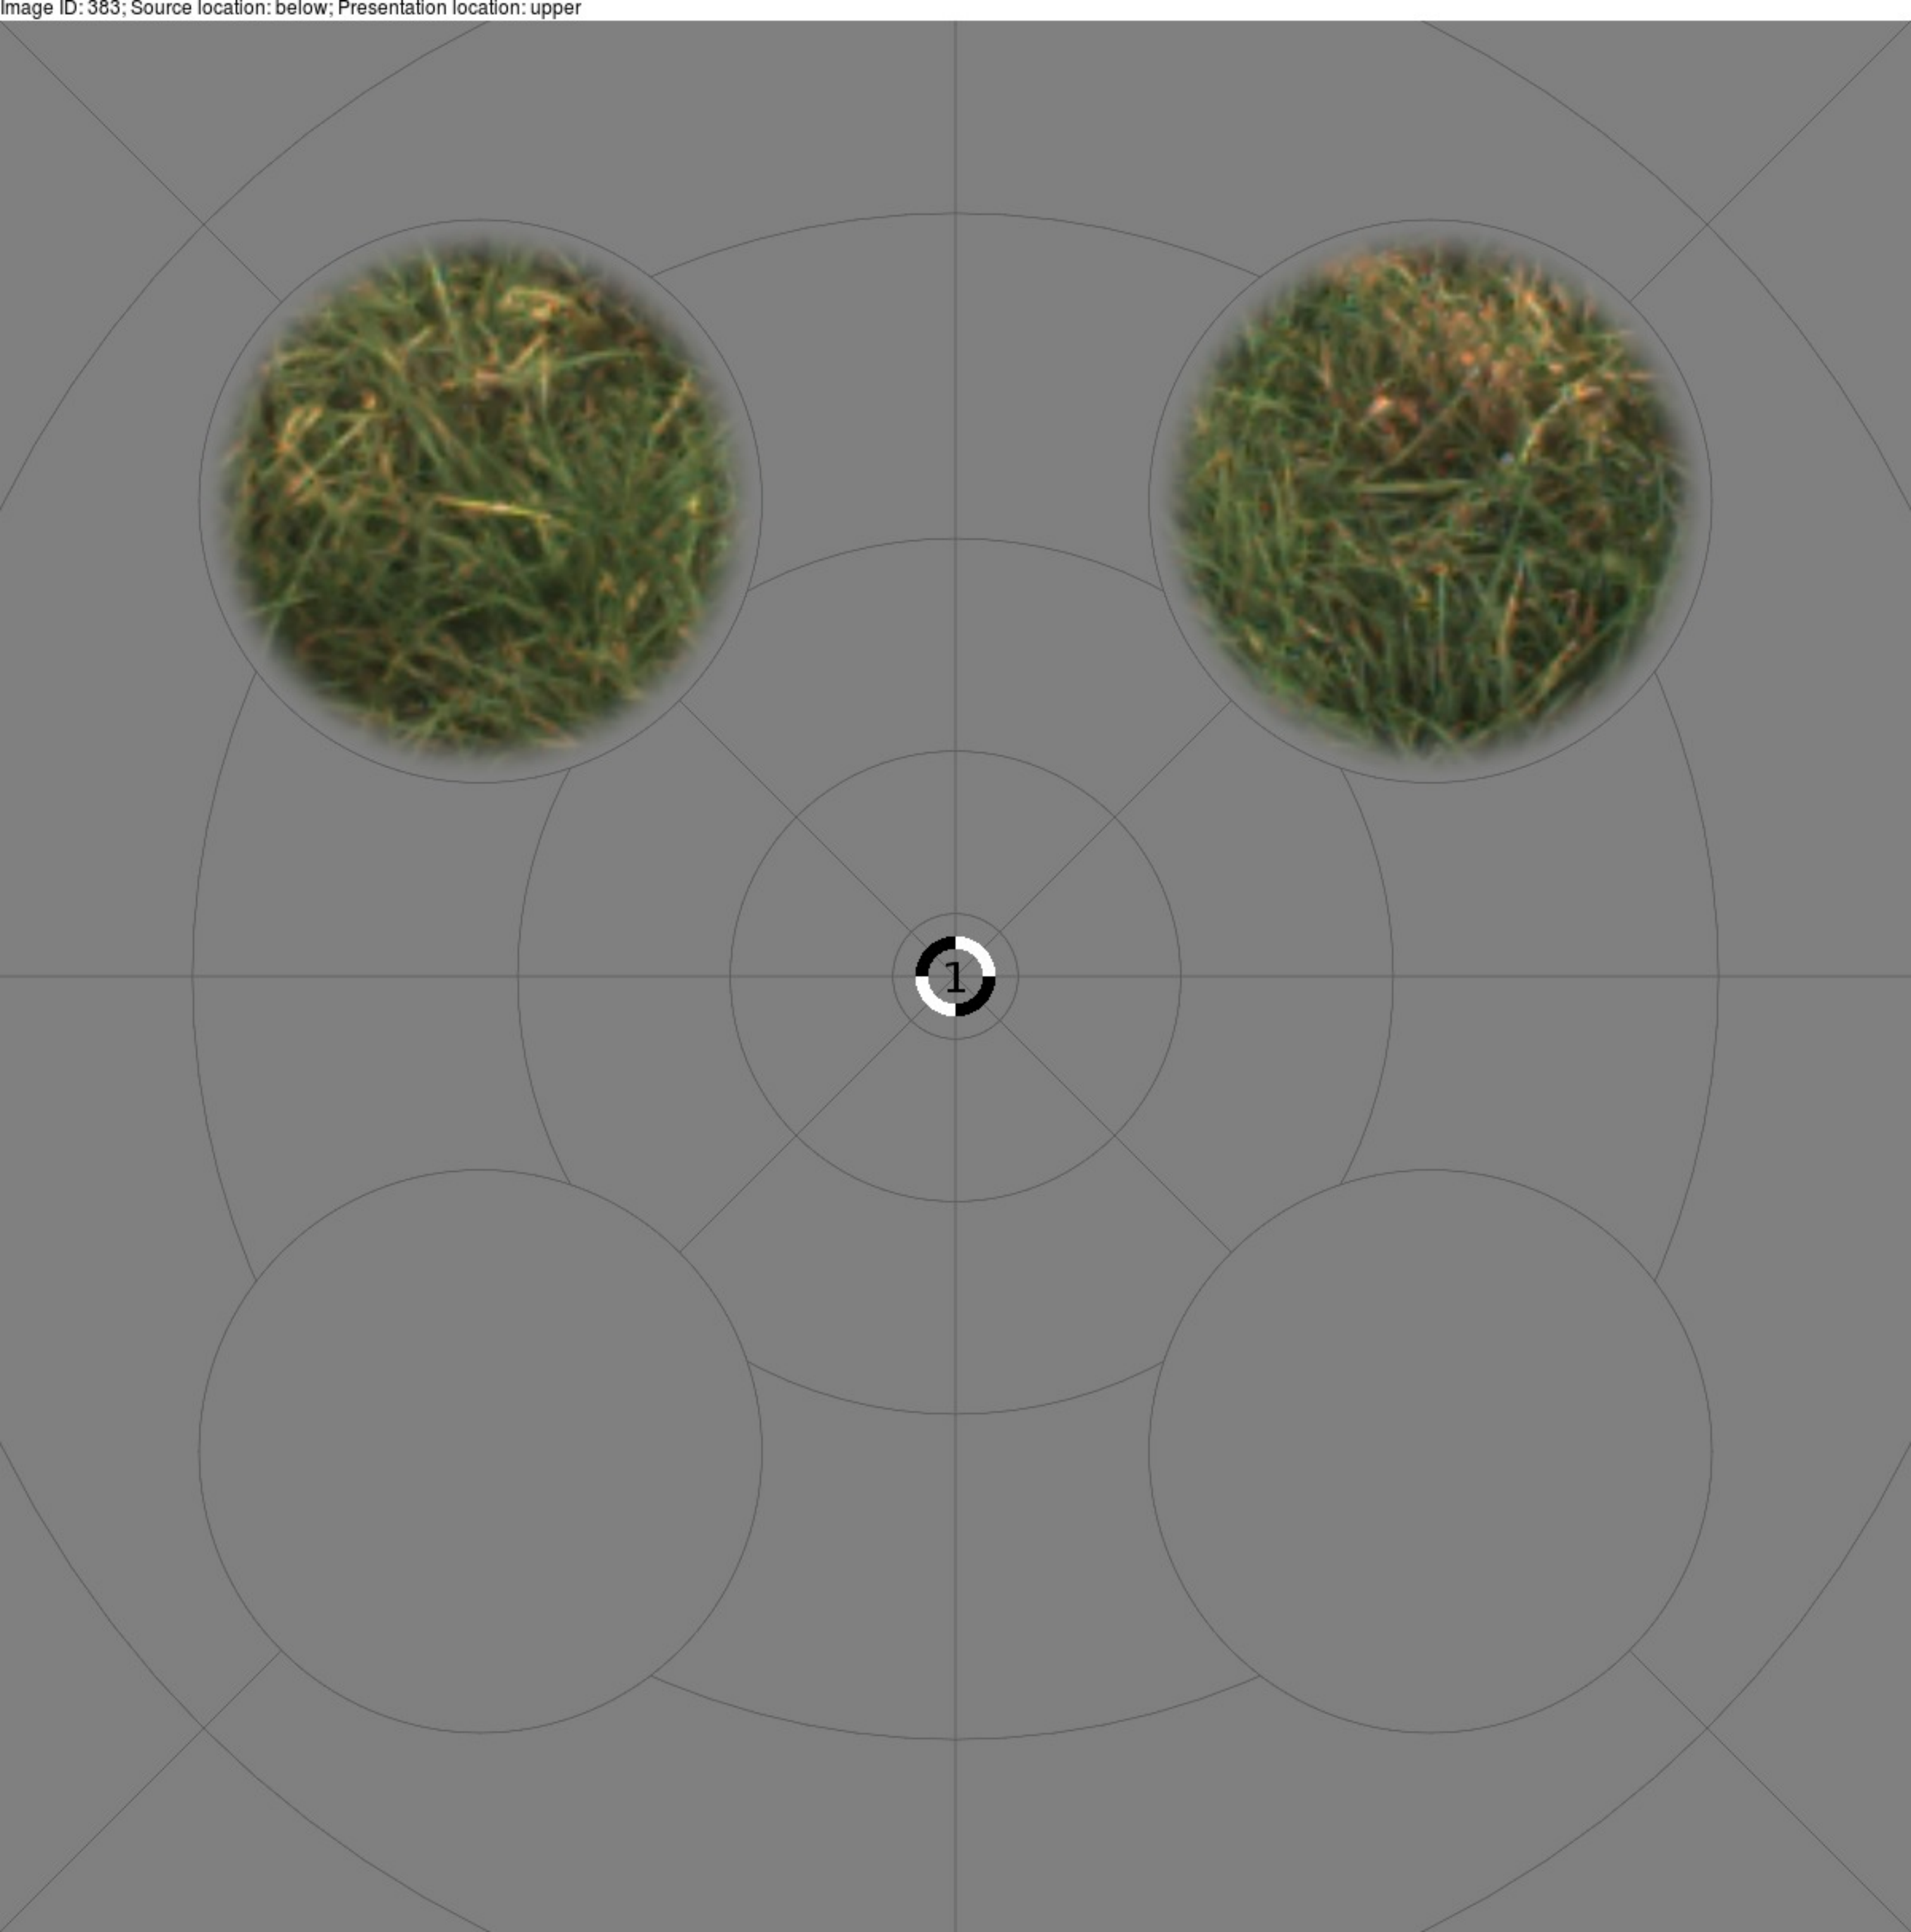

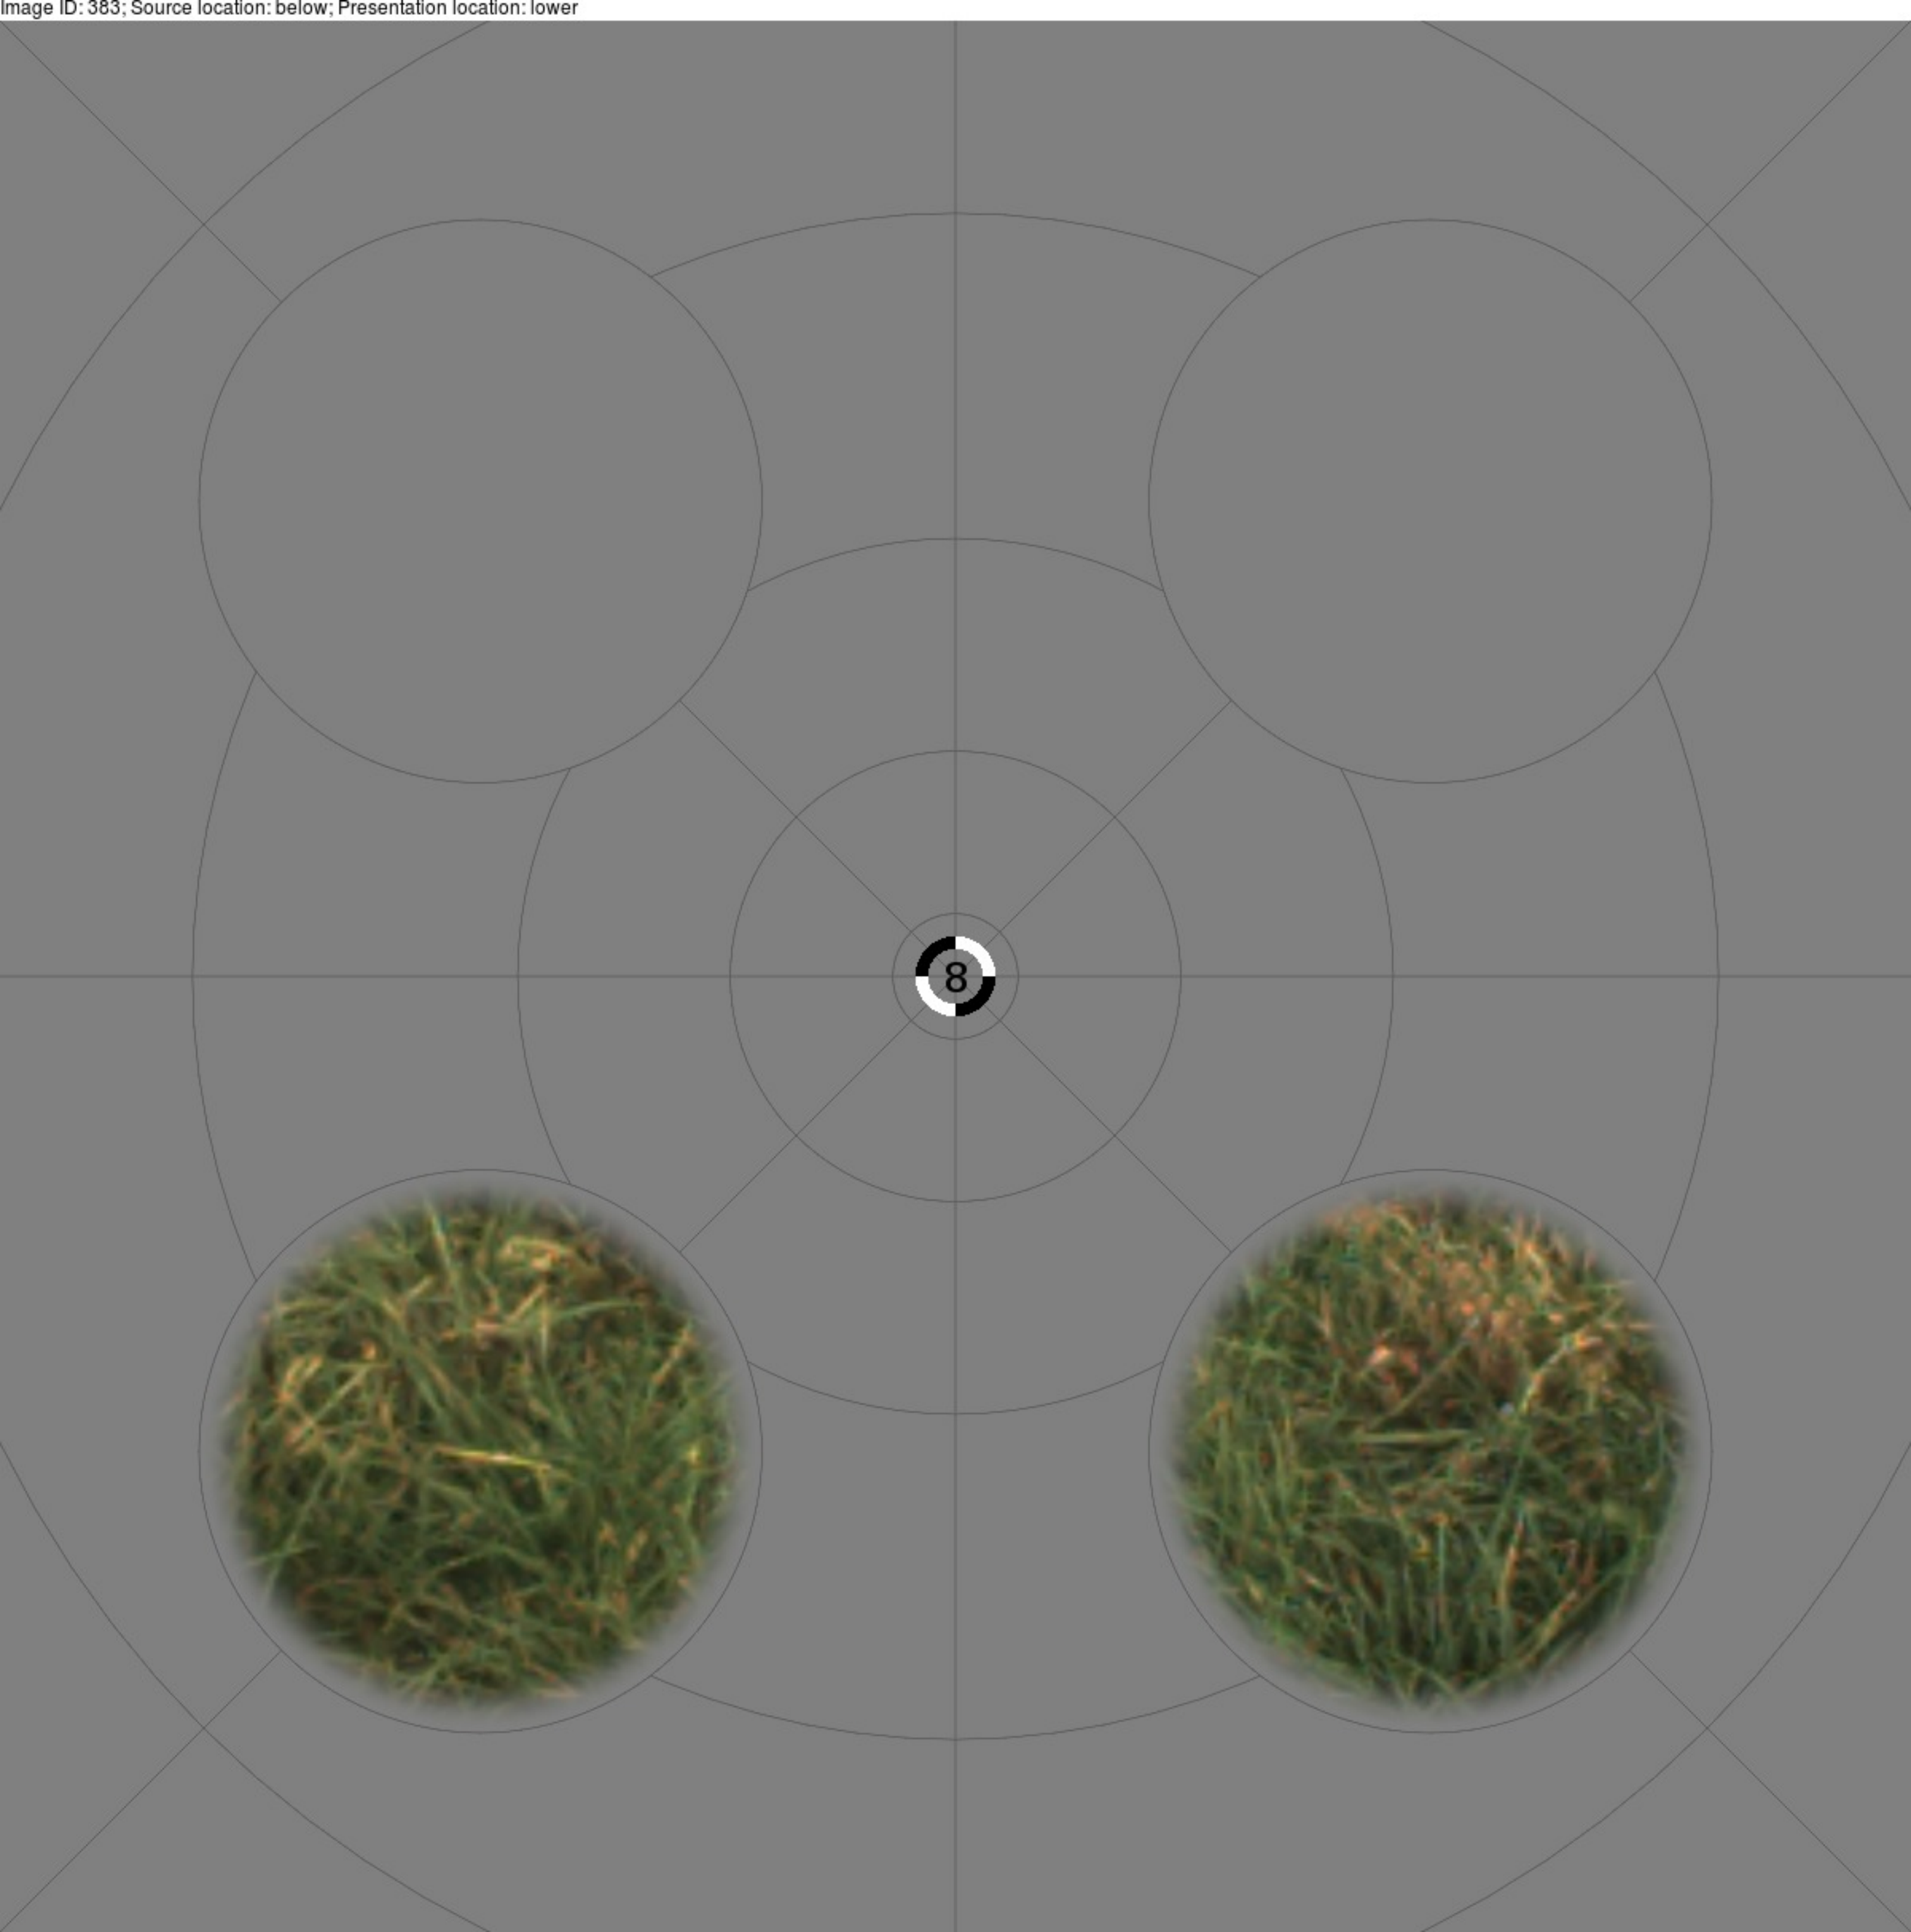



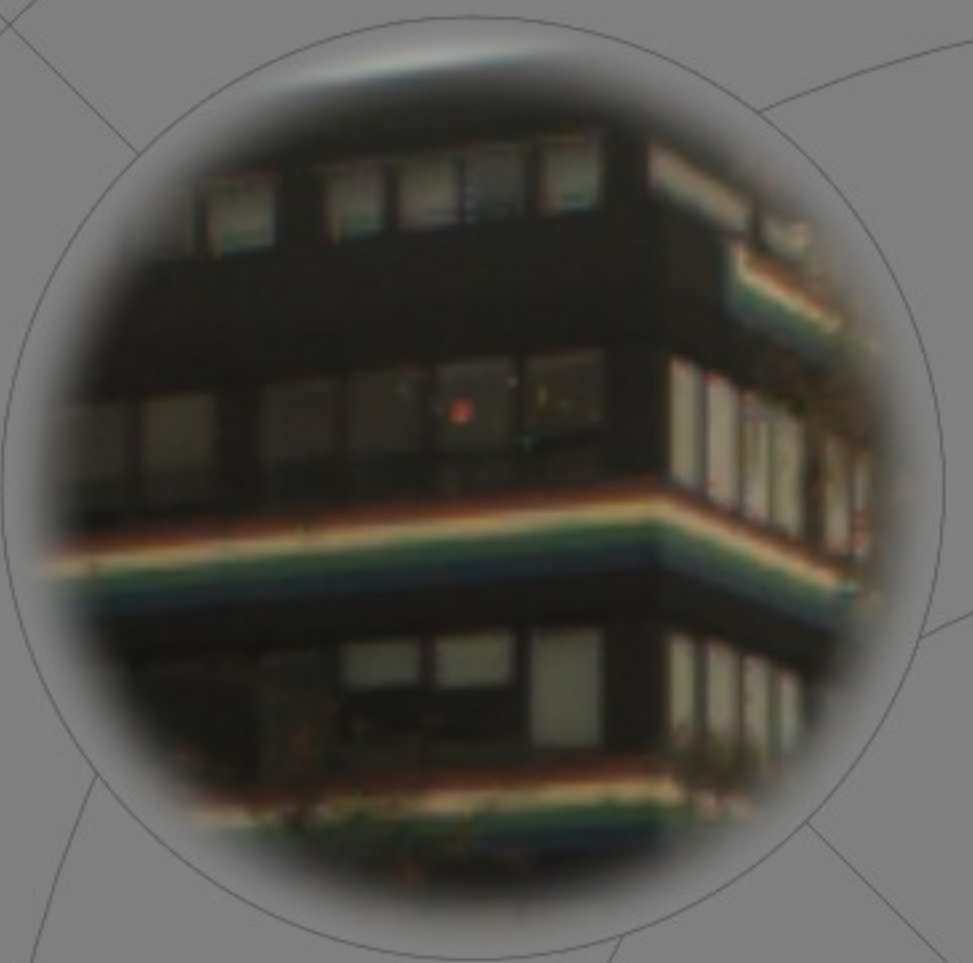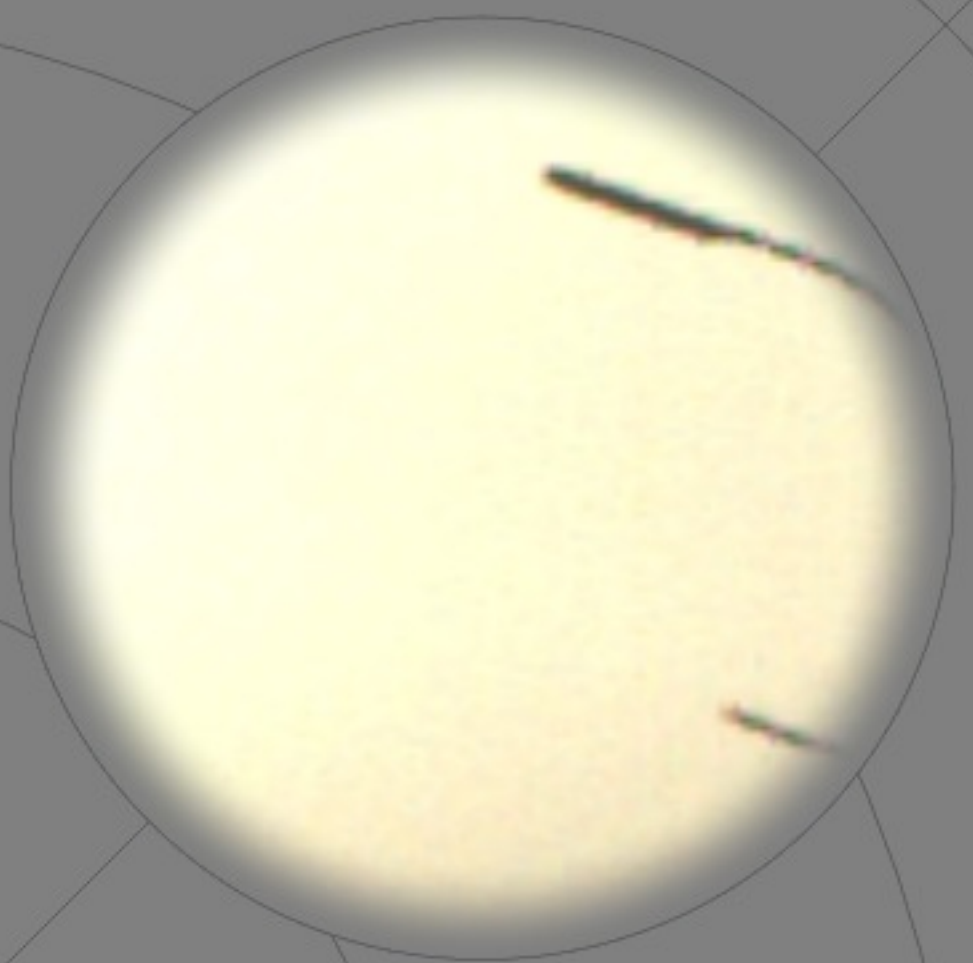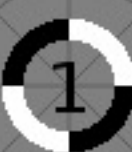



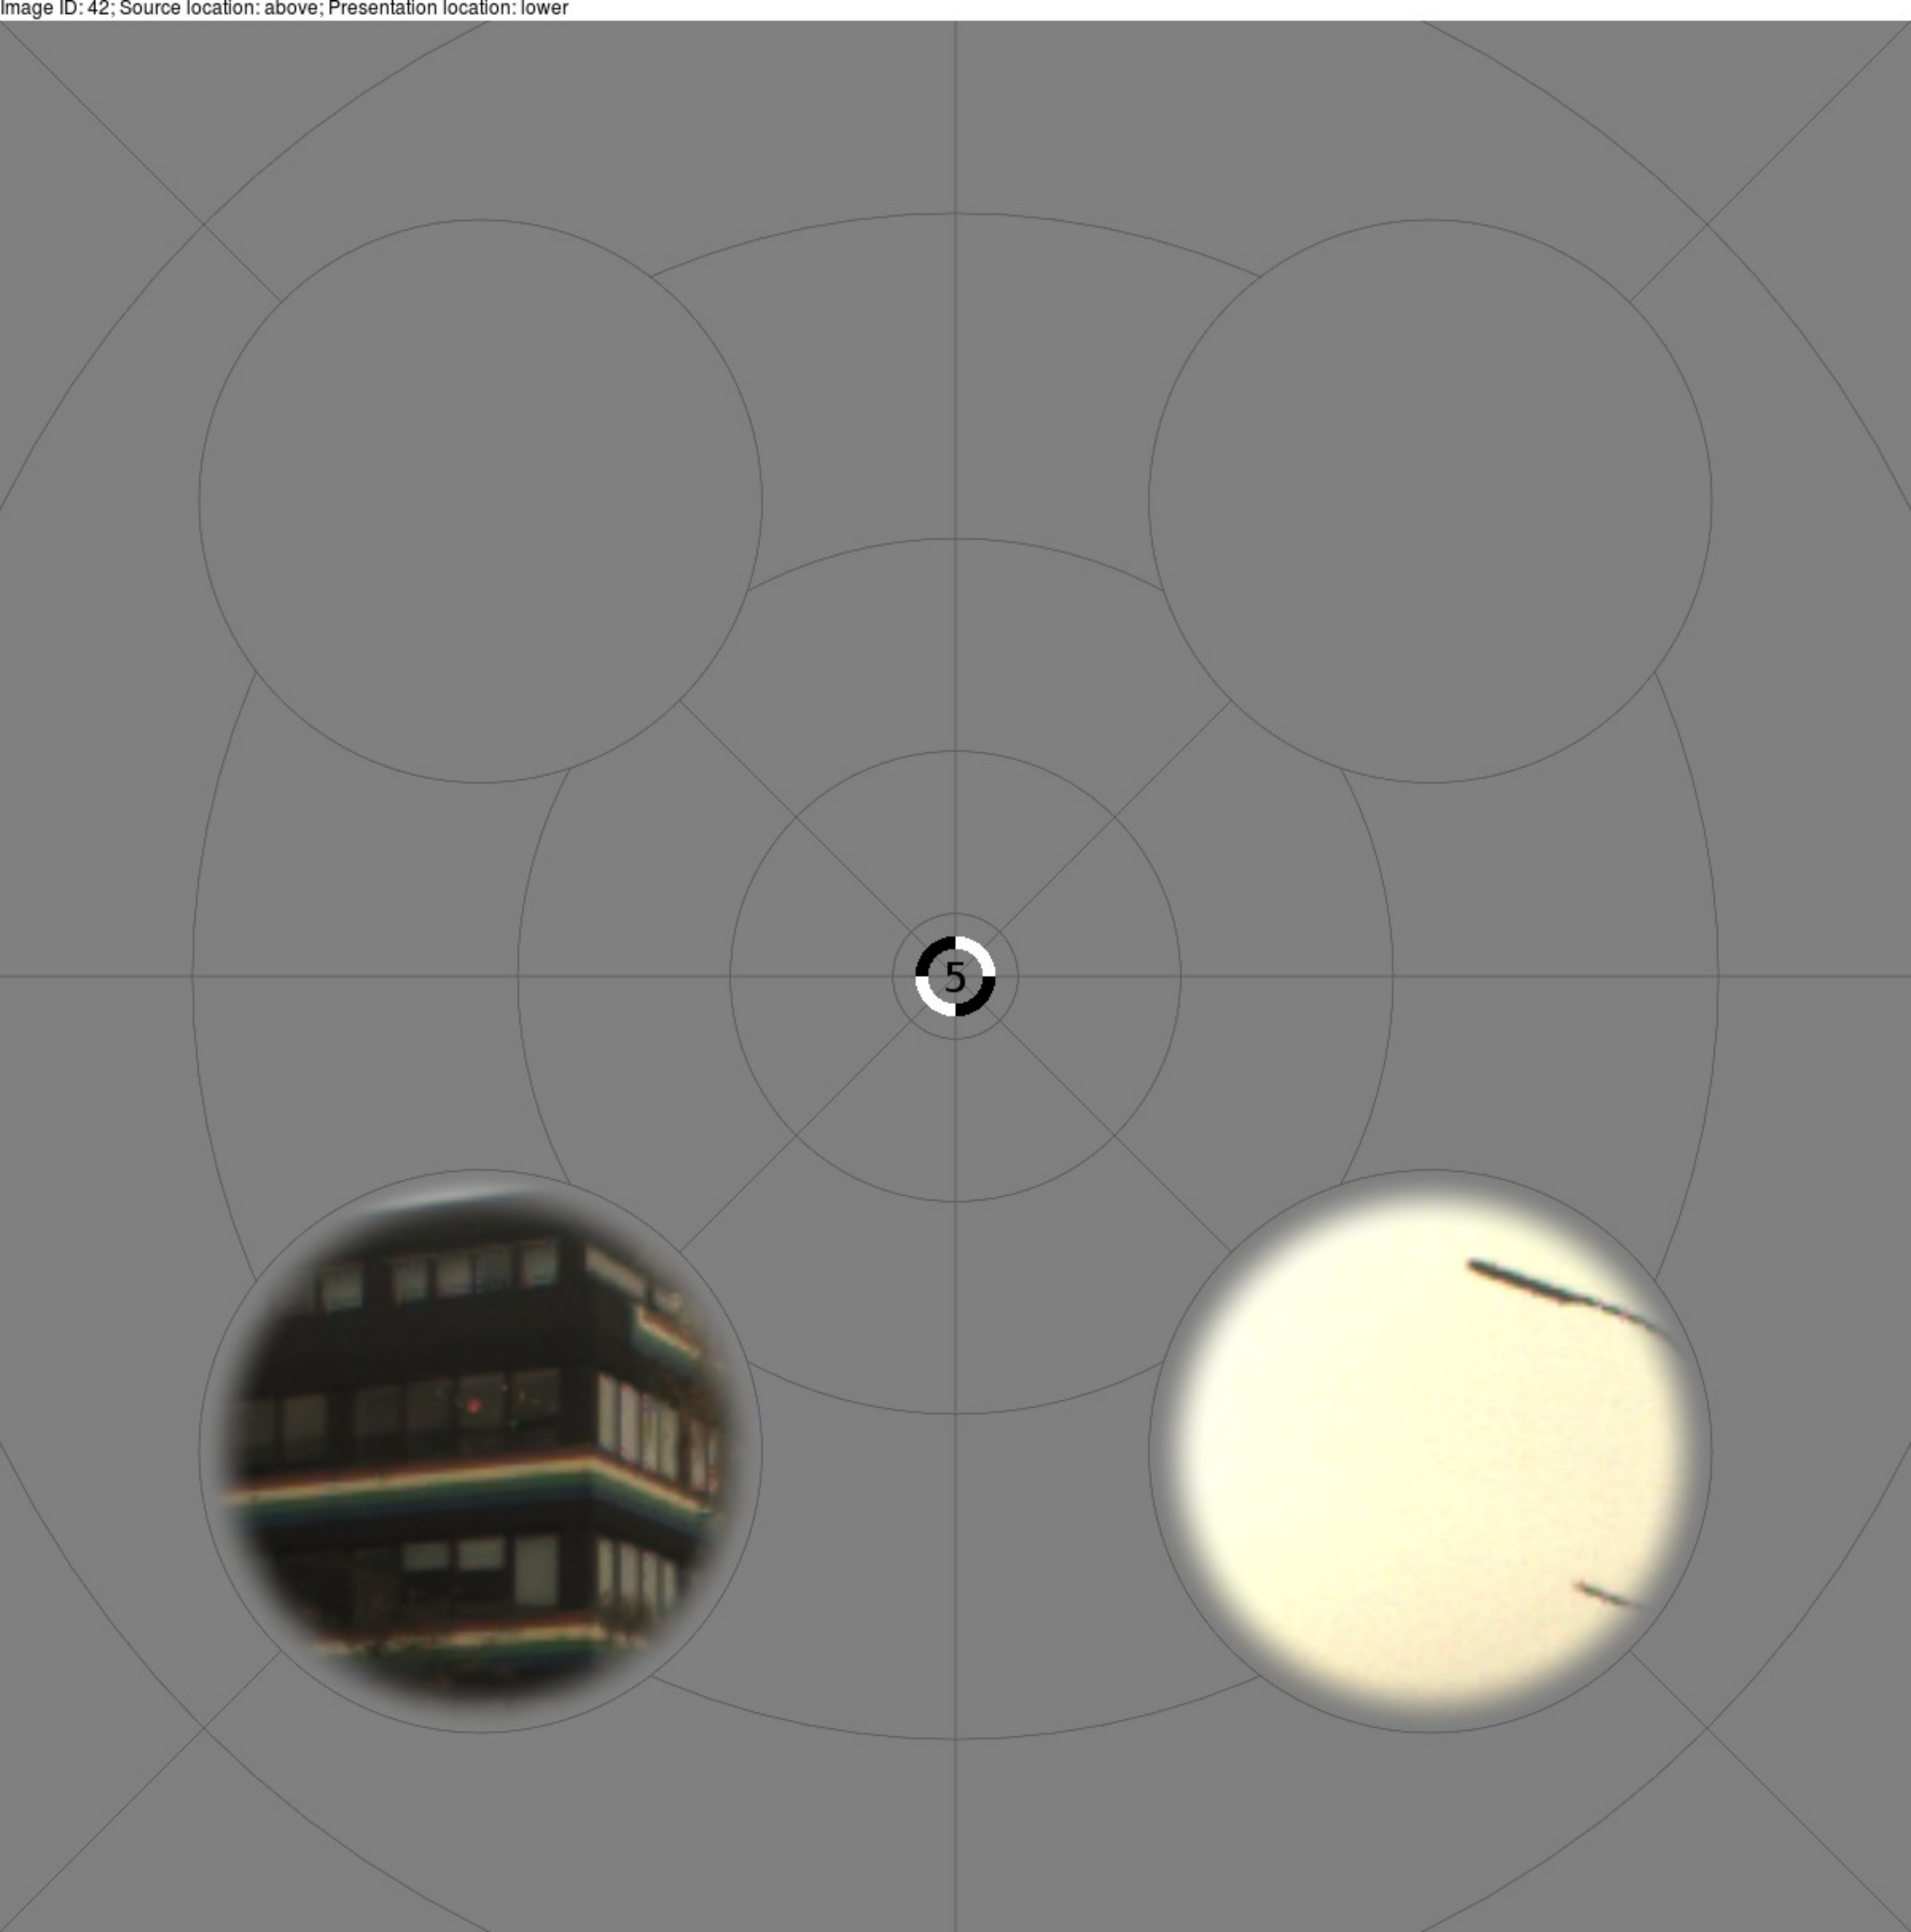

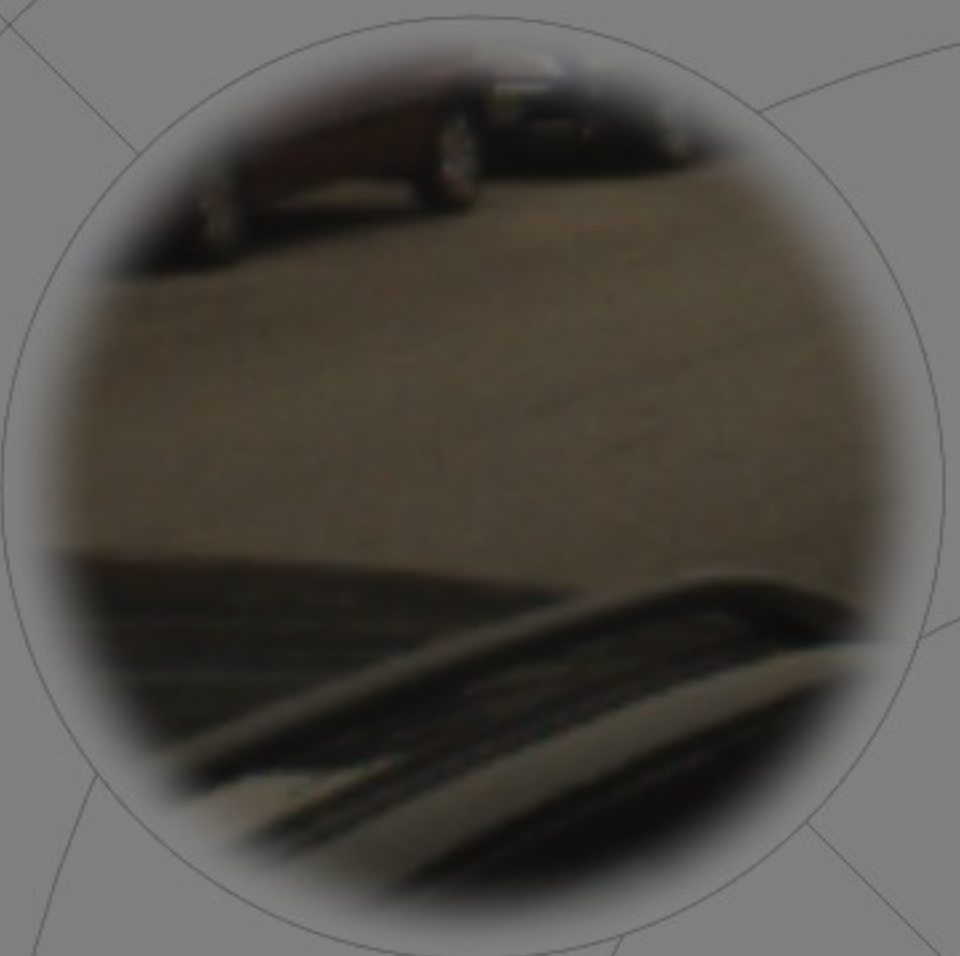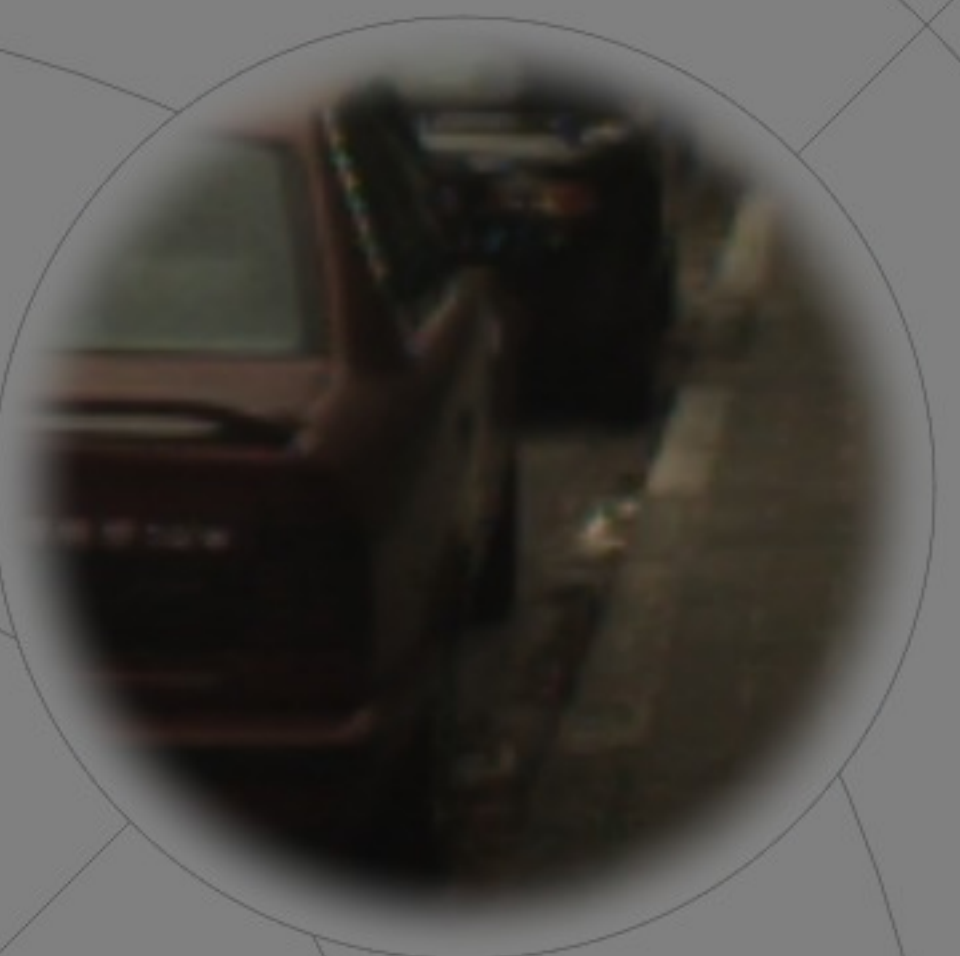

2

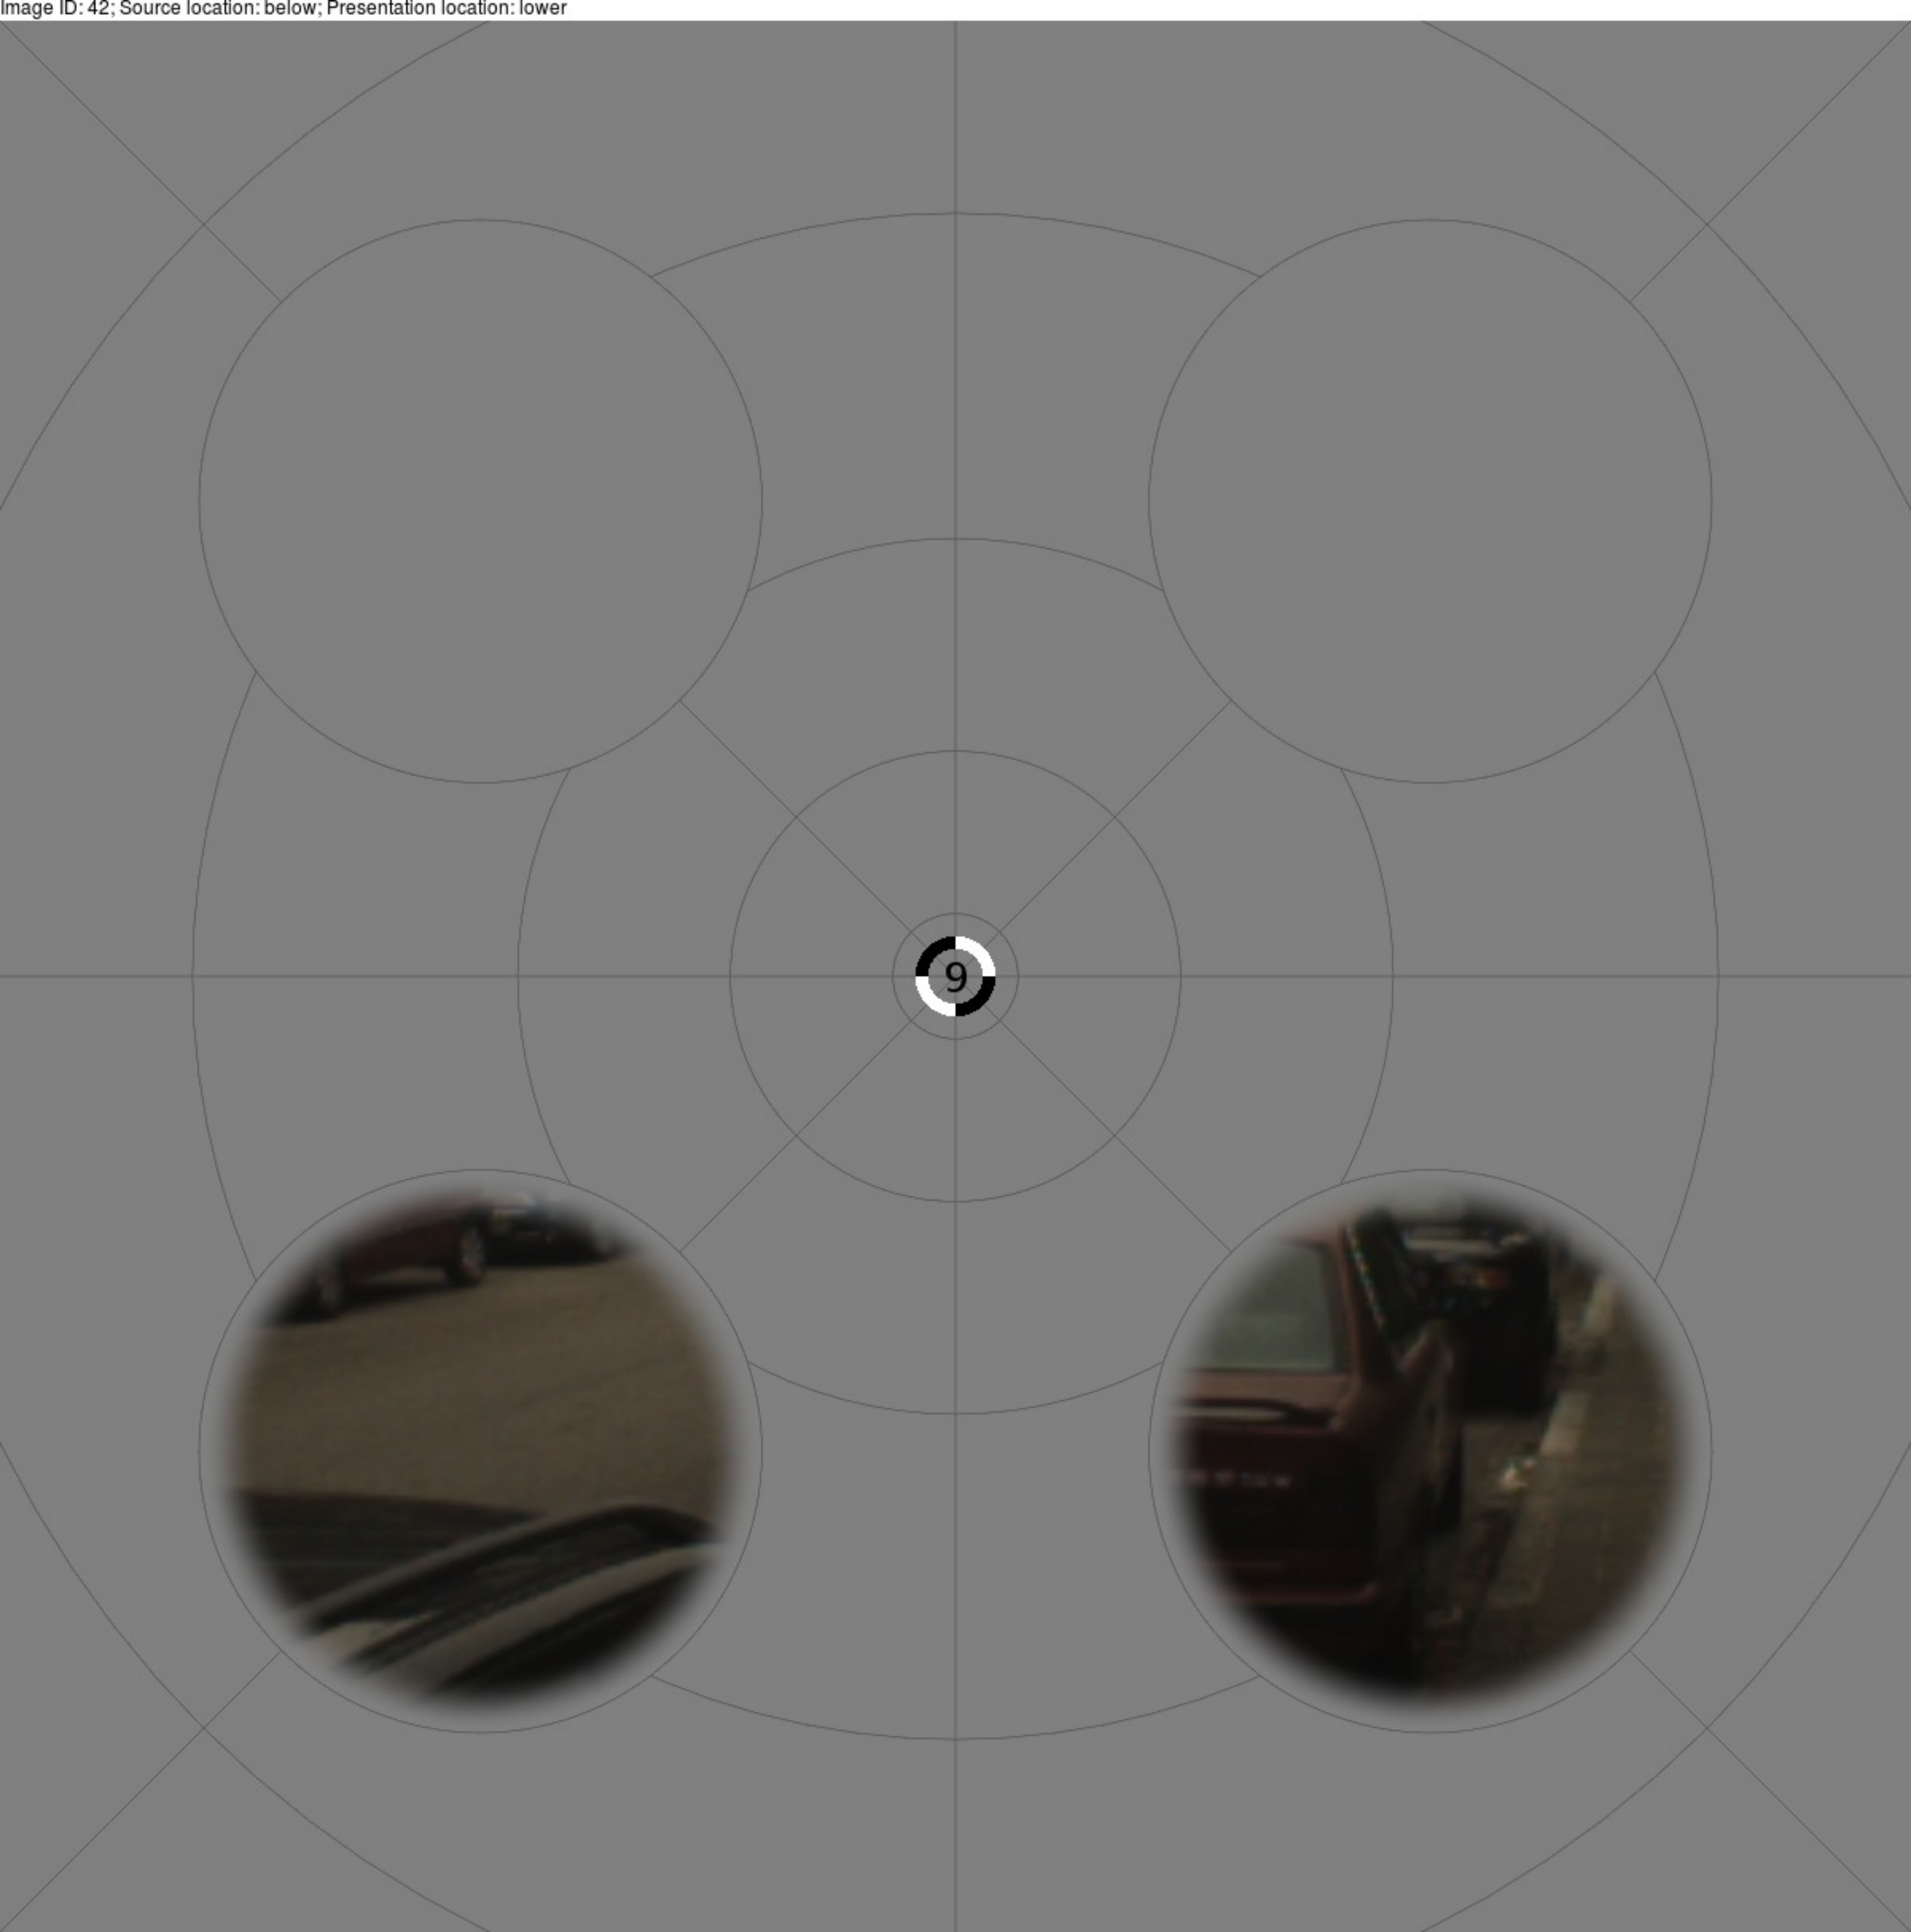



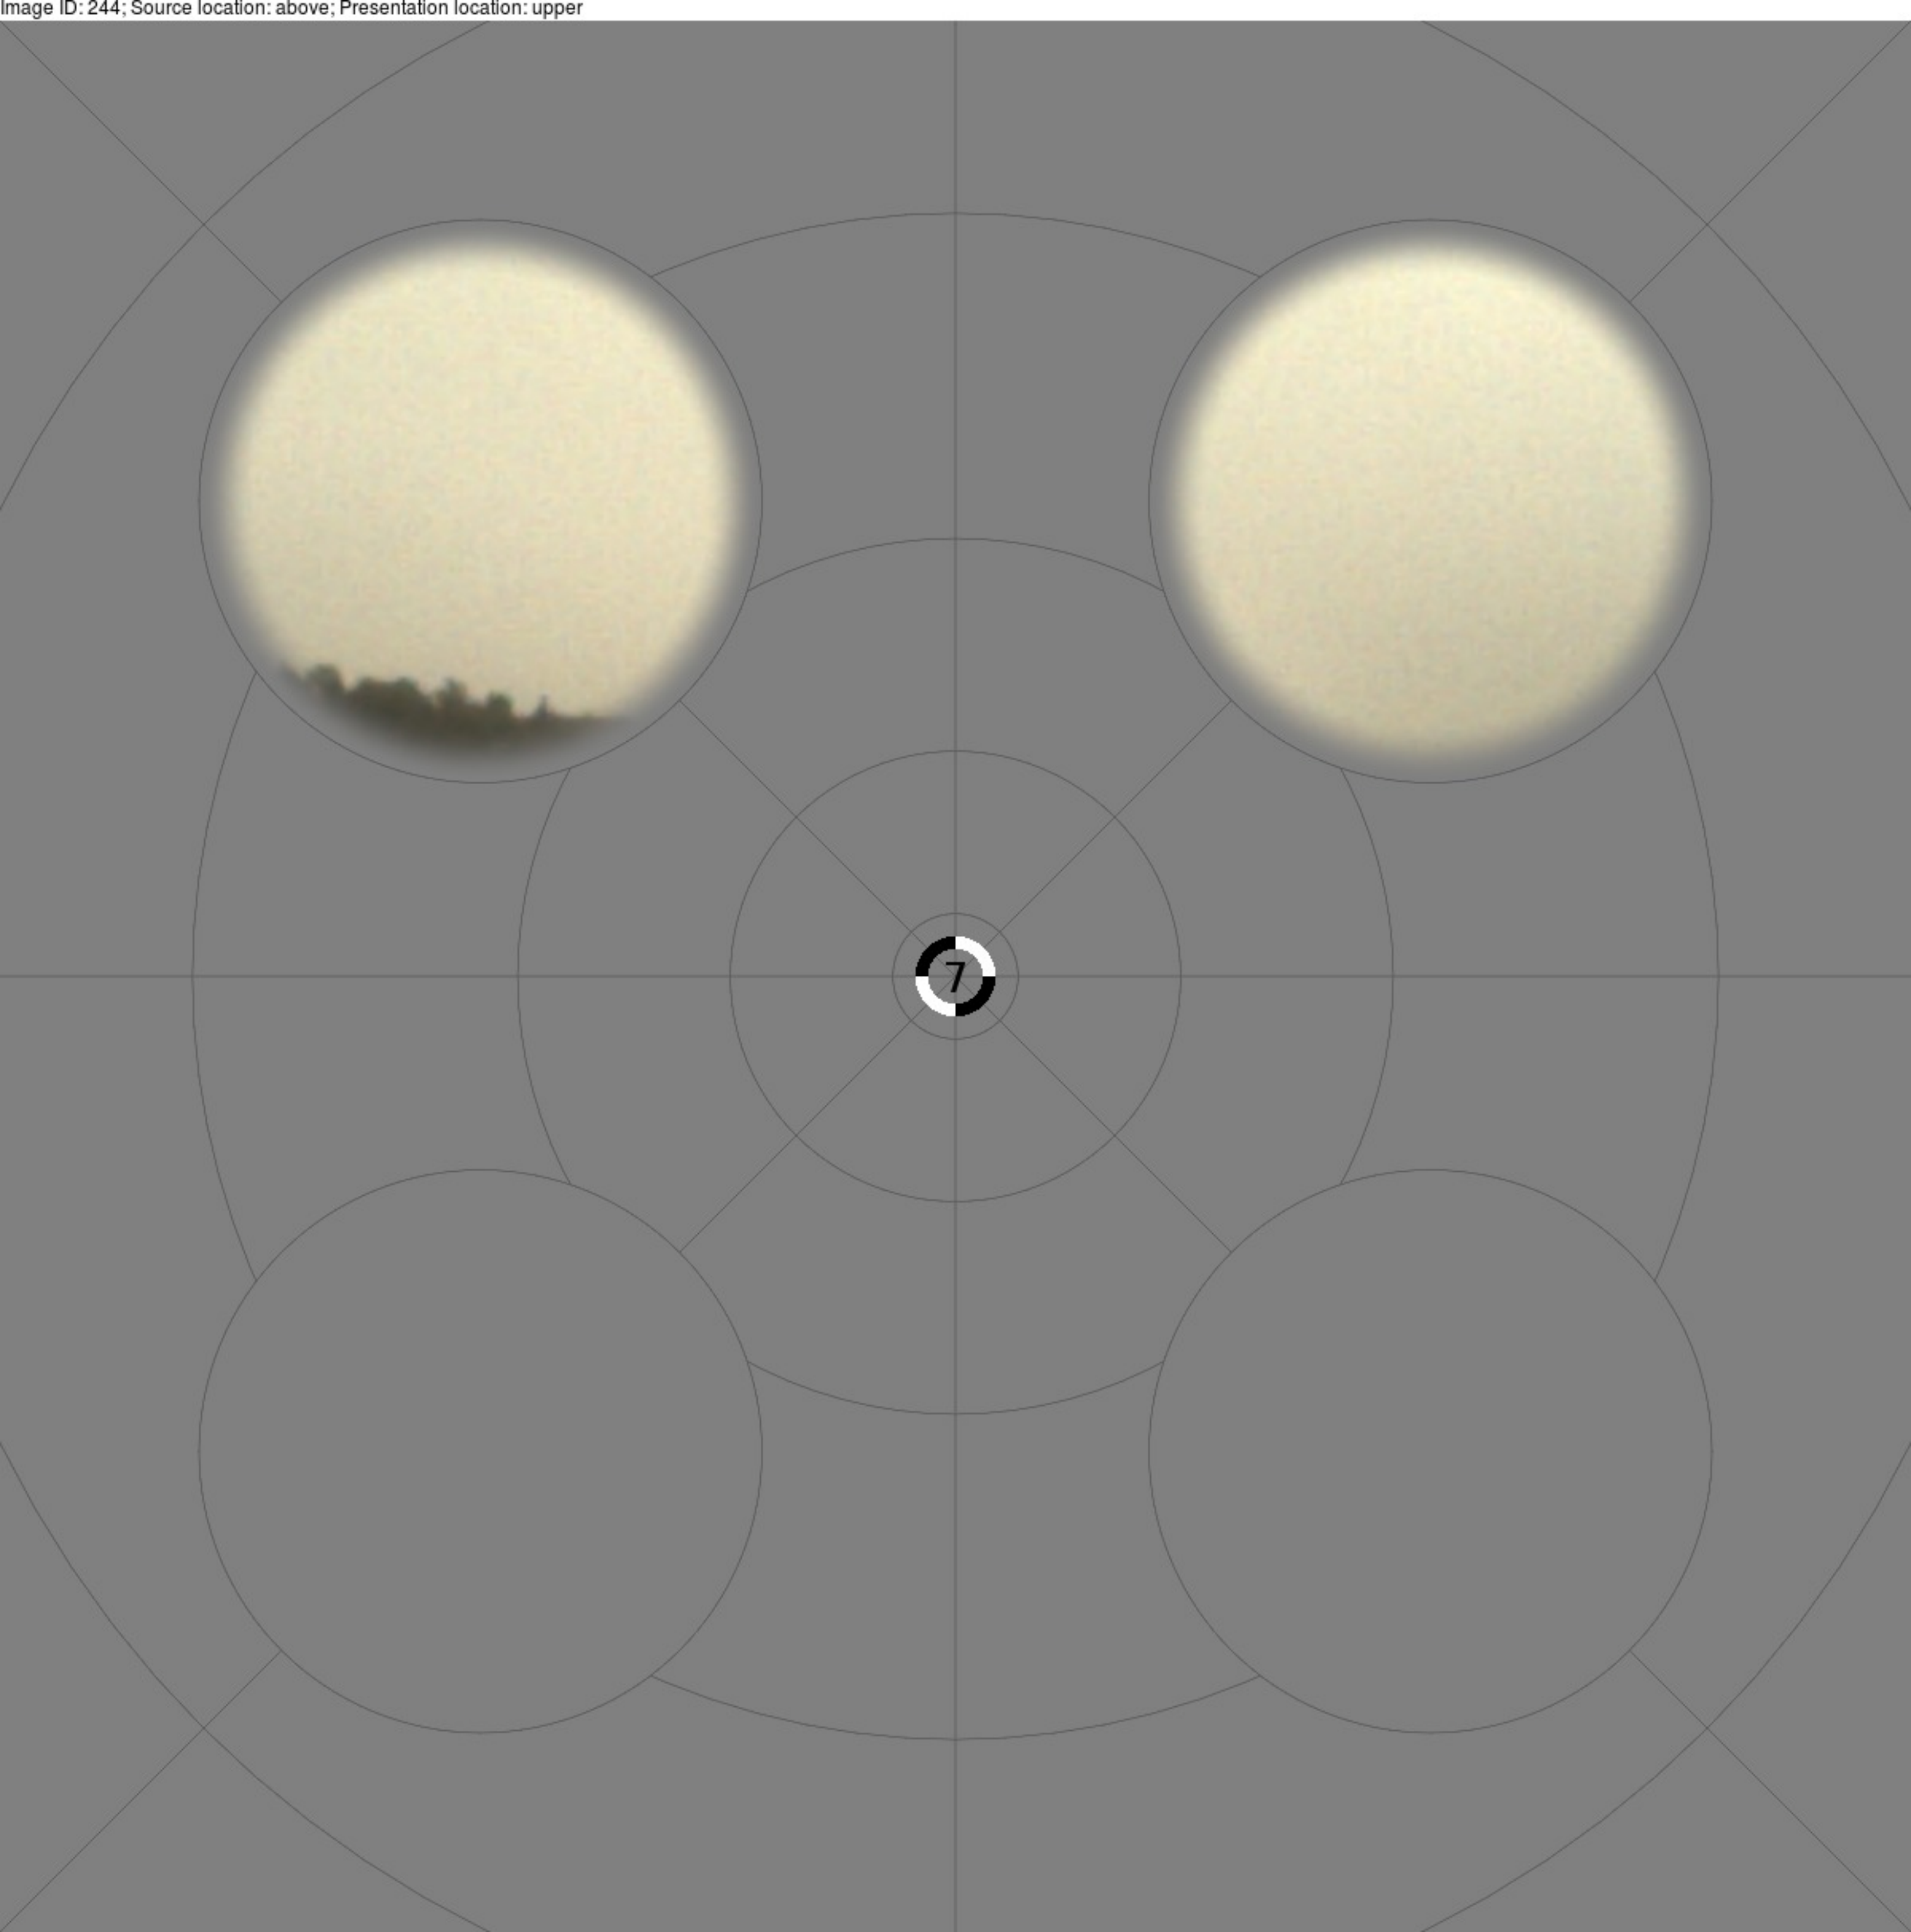

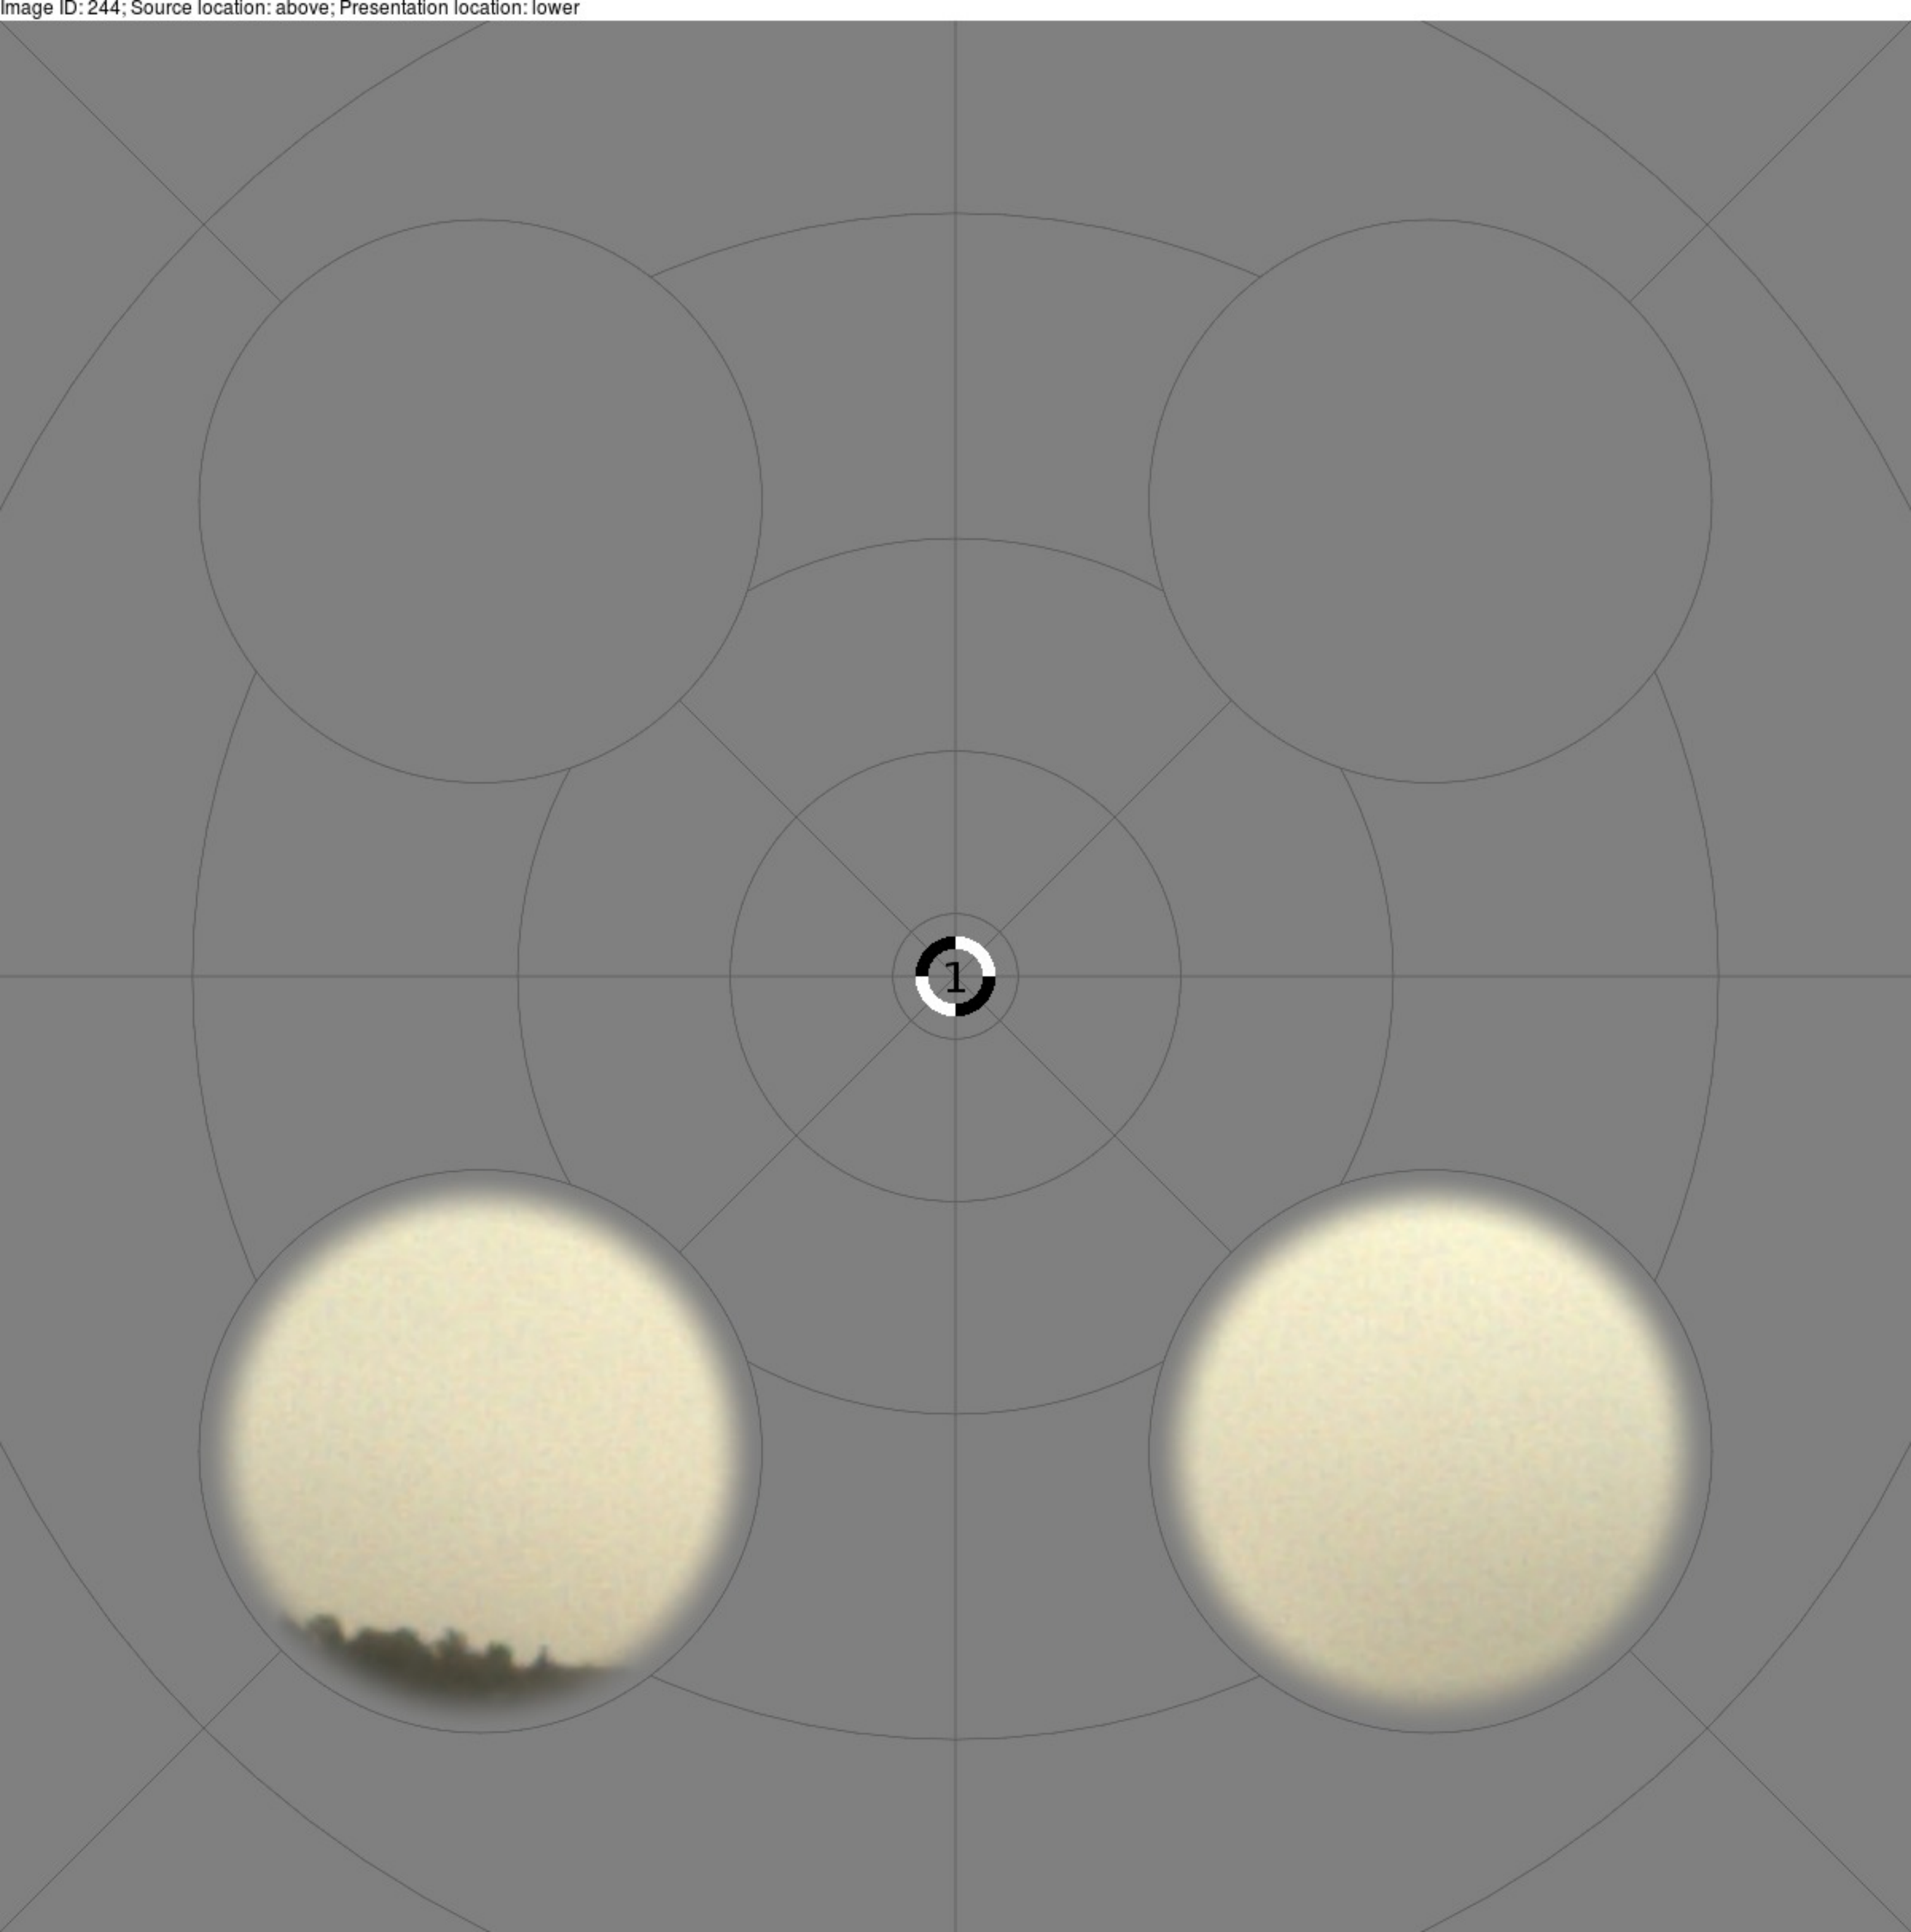

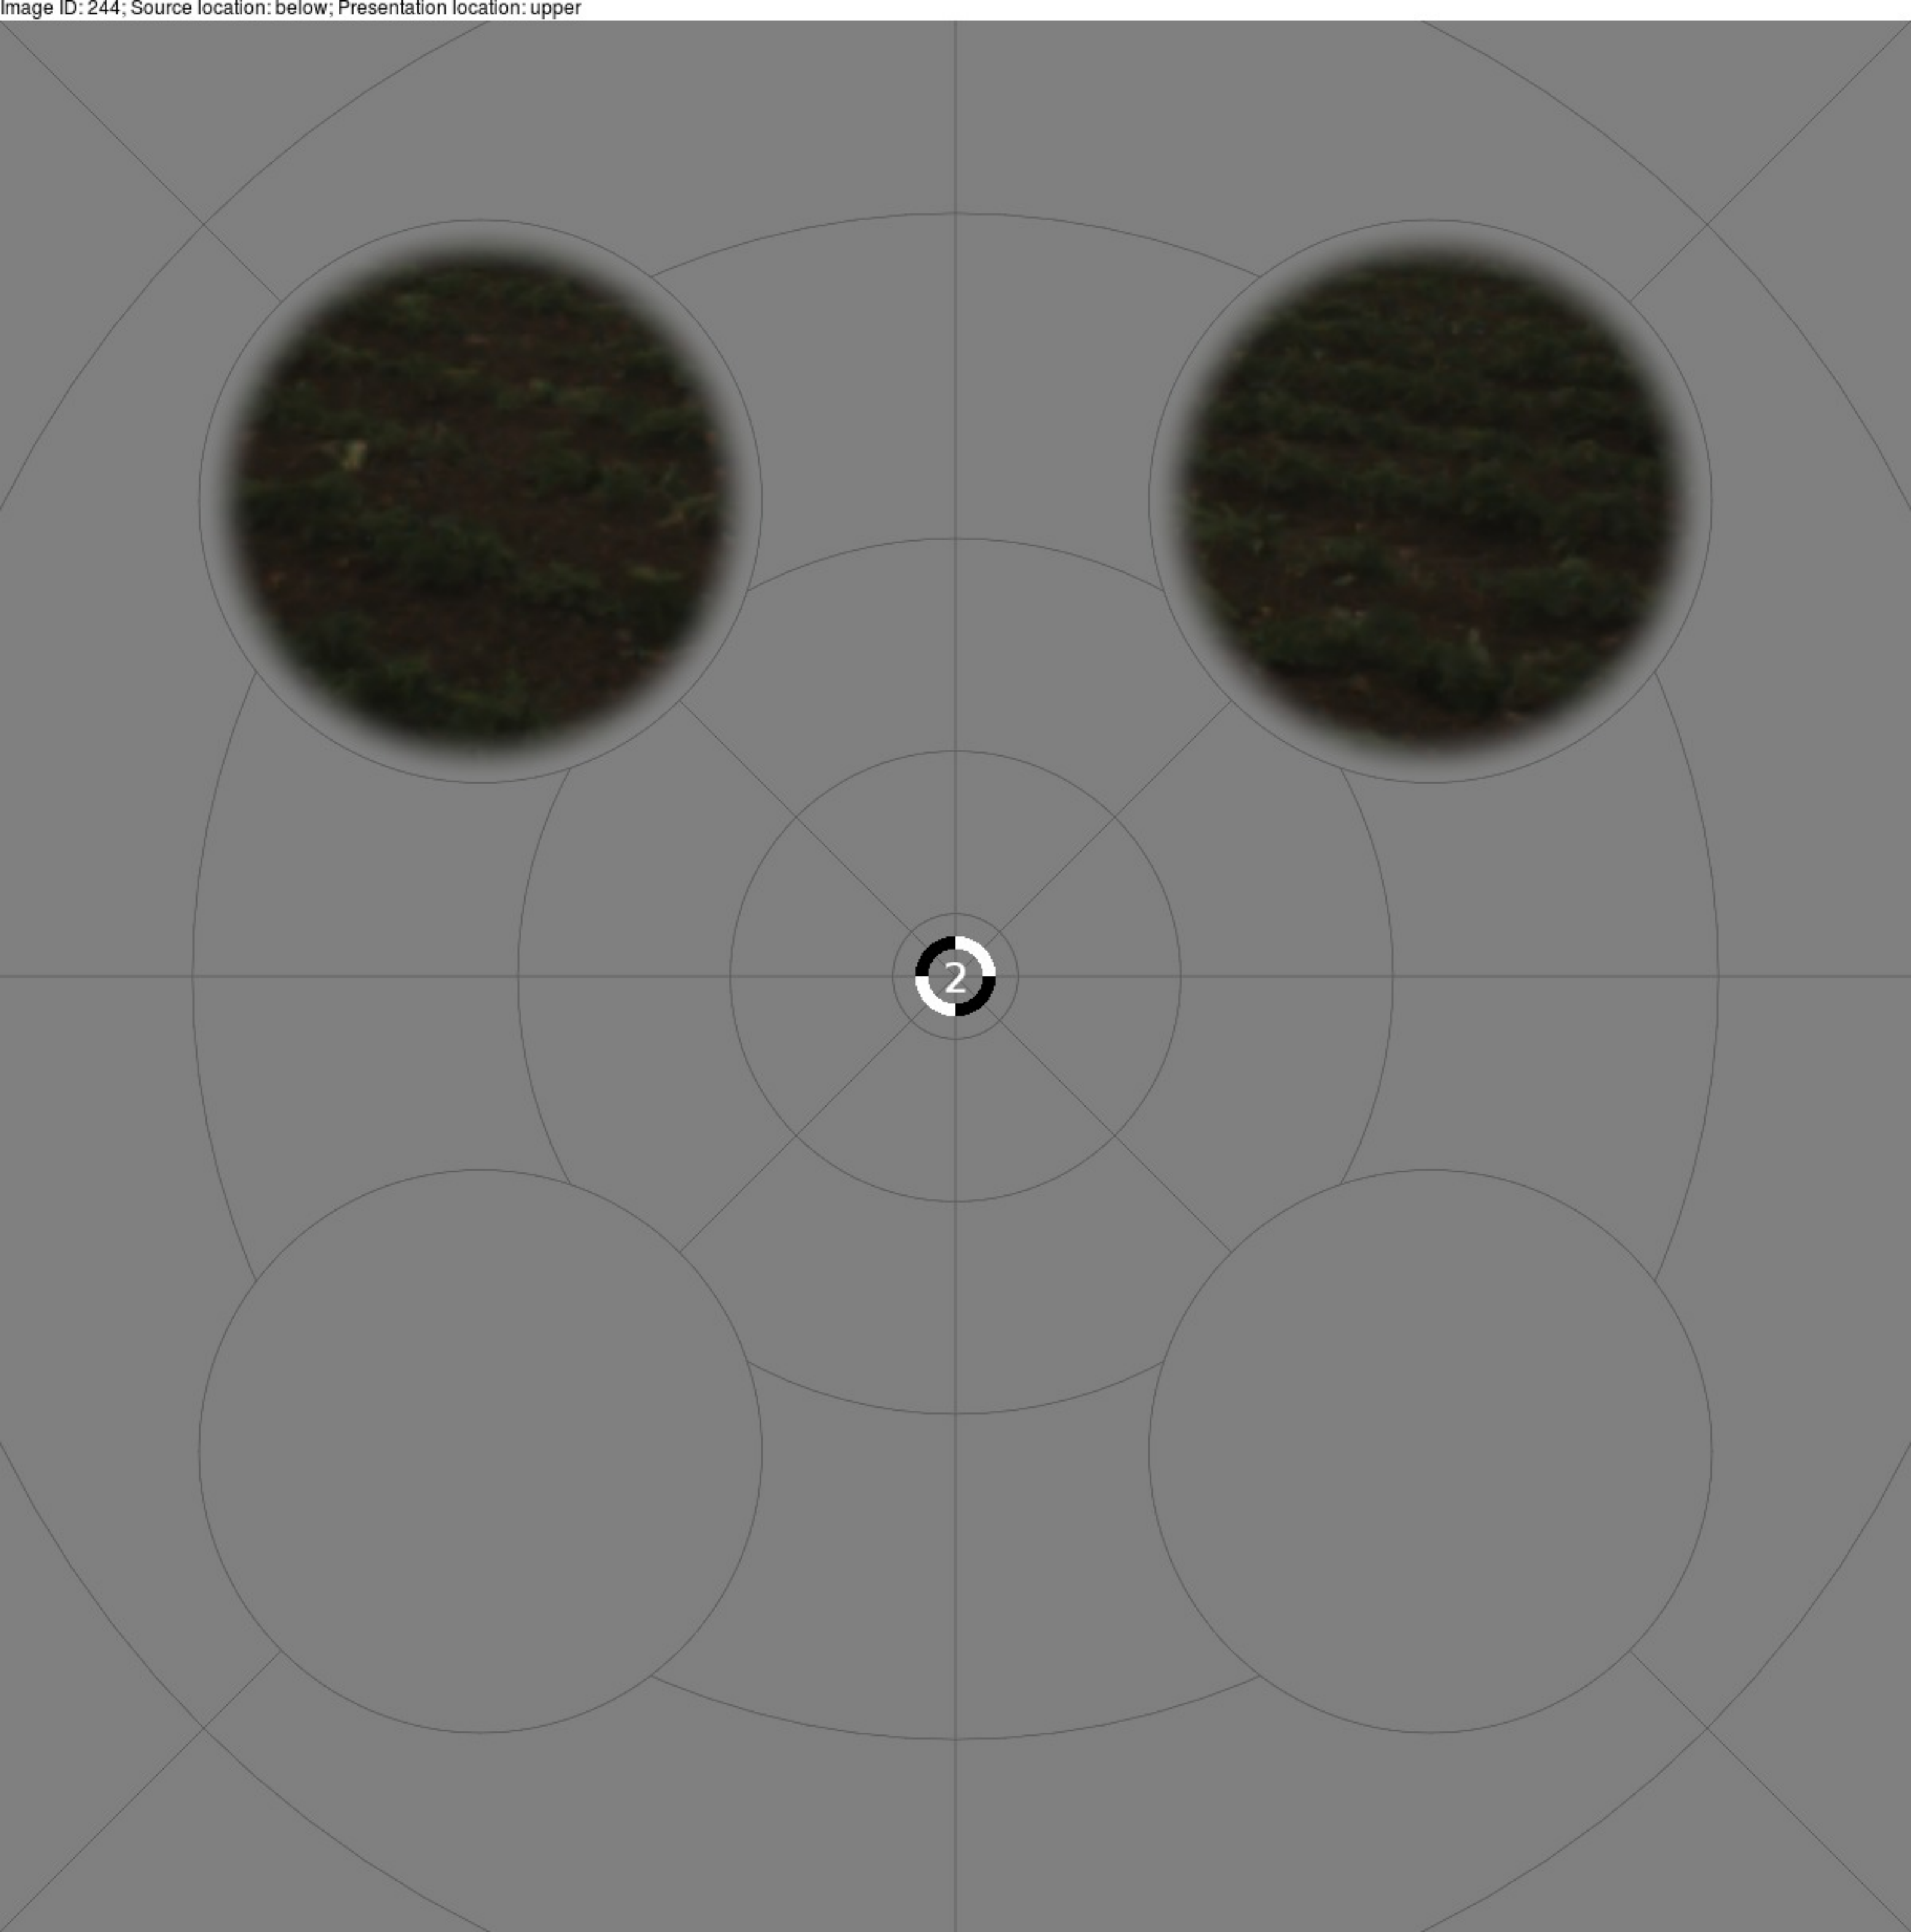



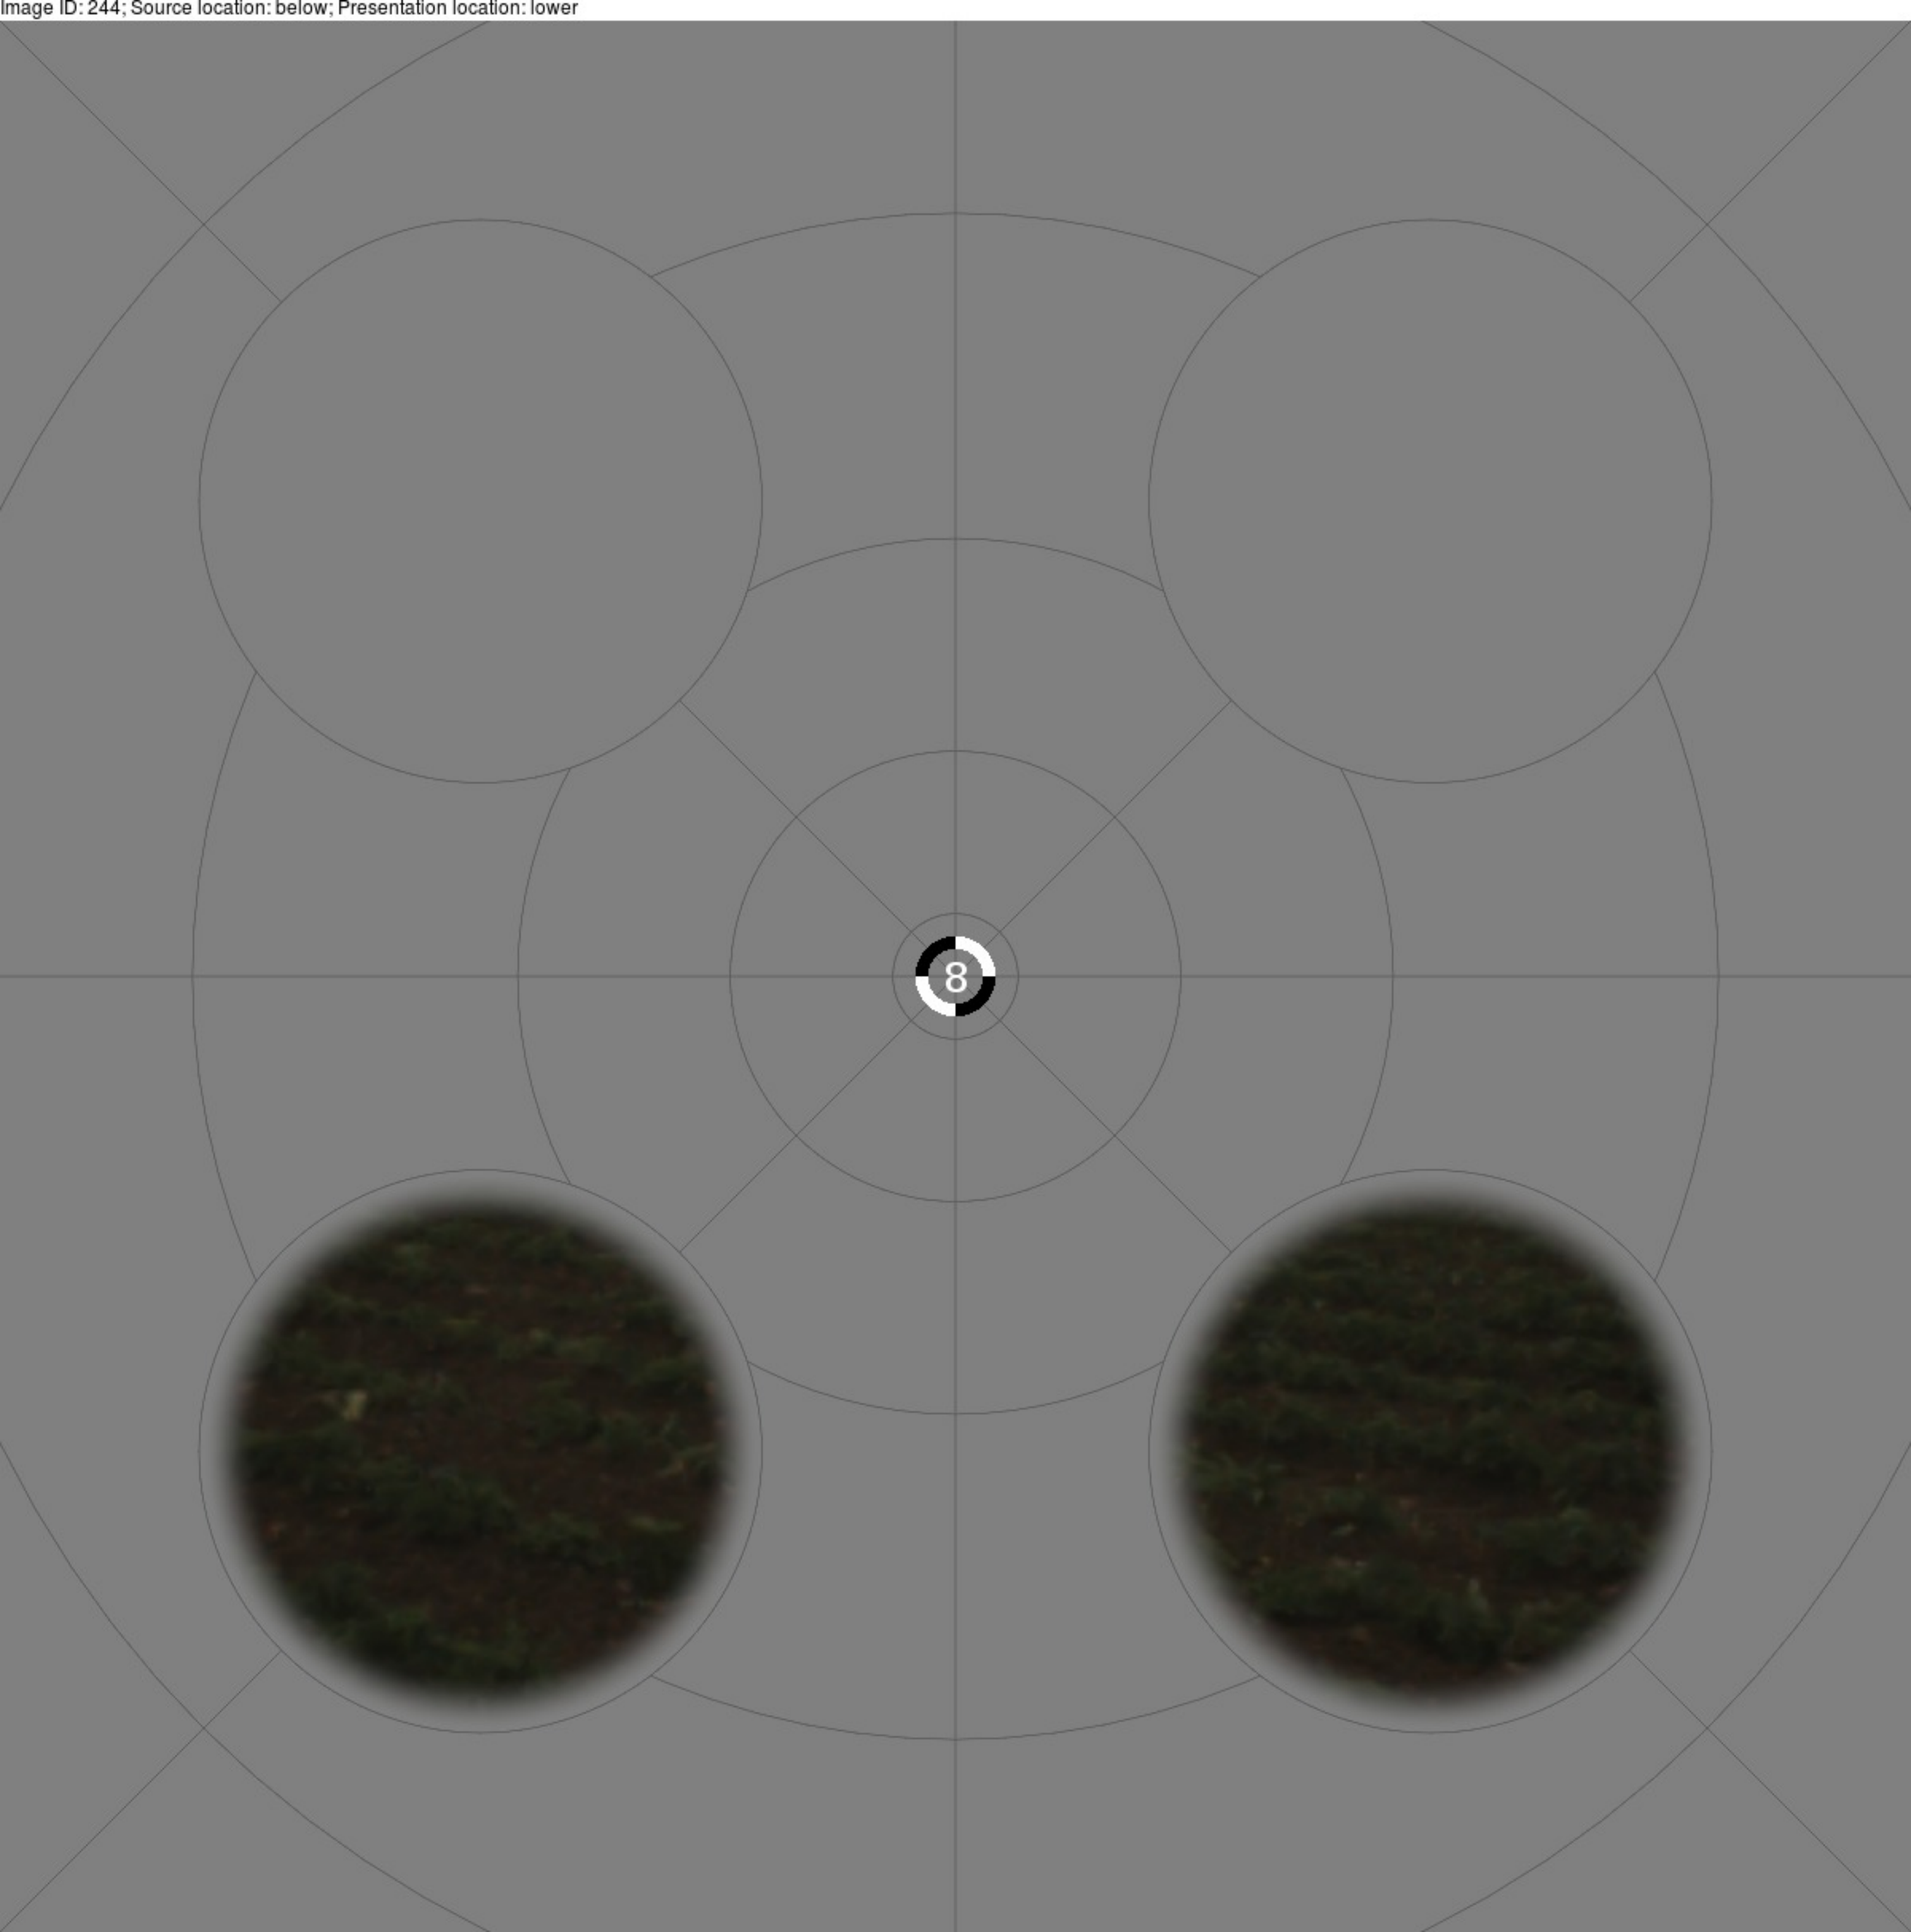

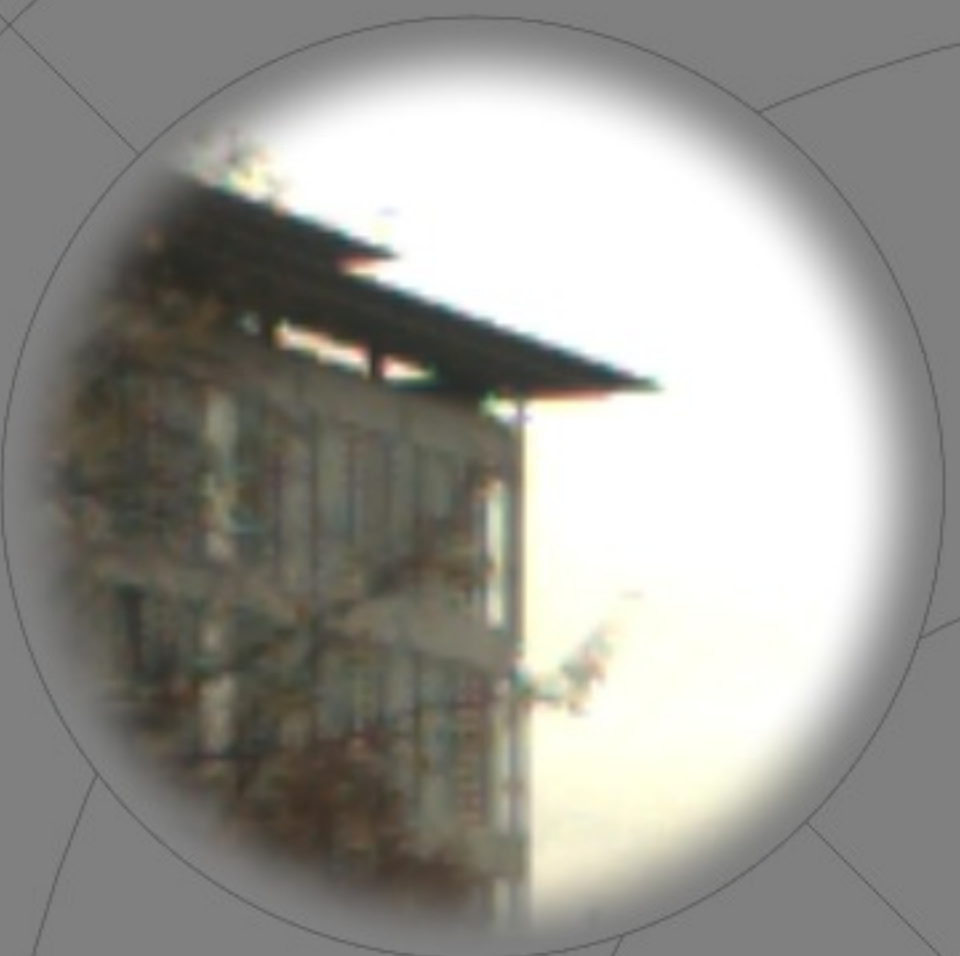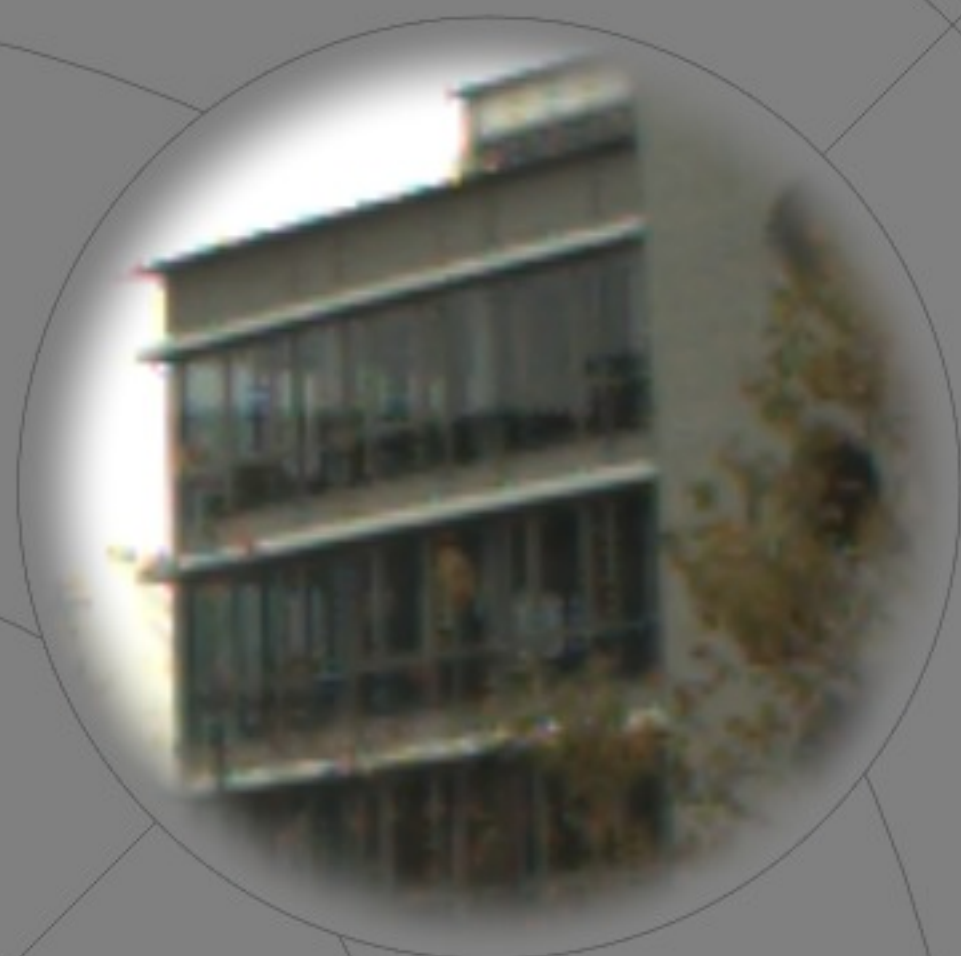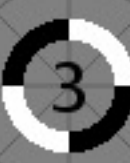

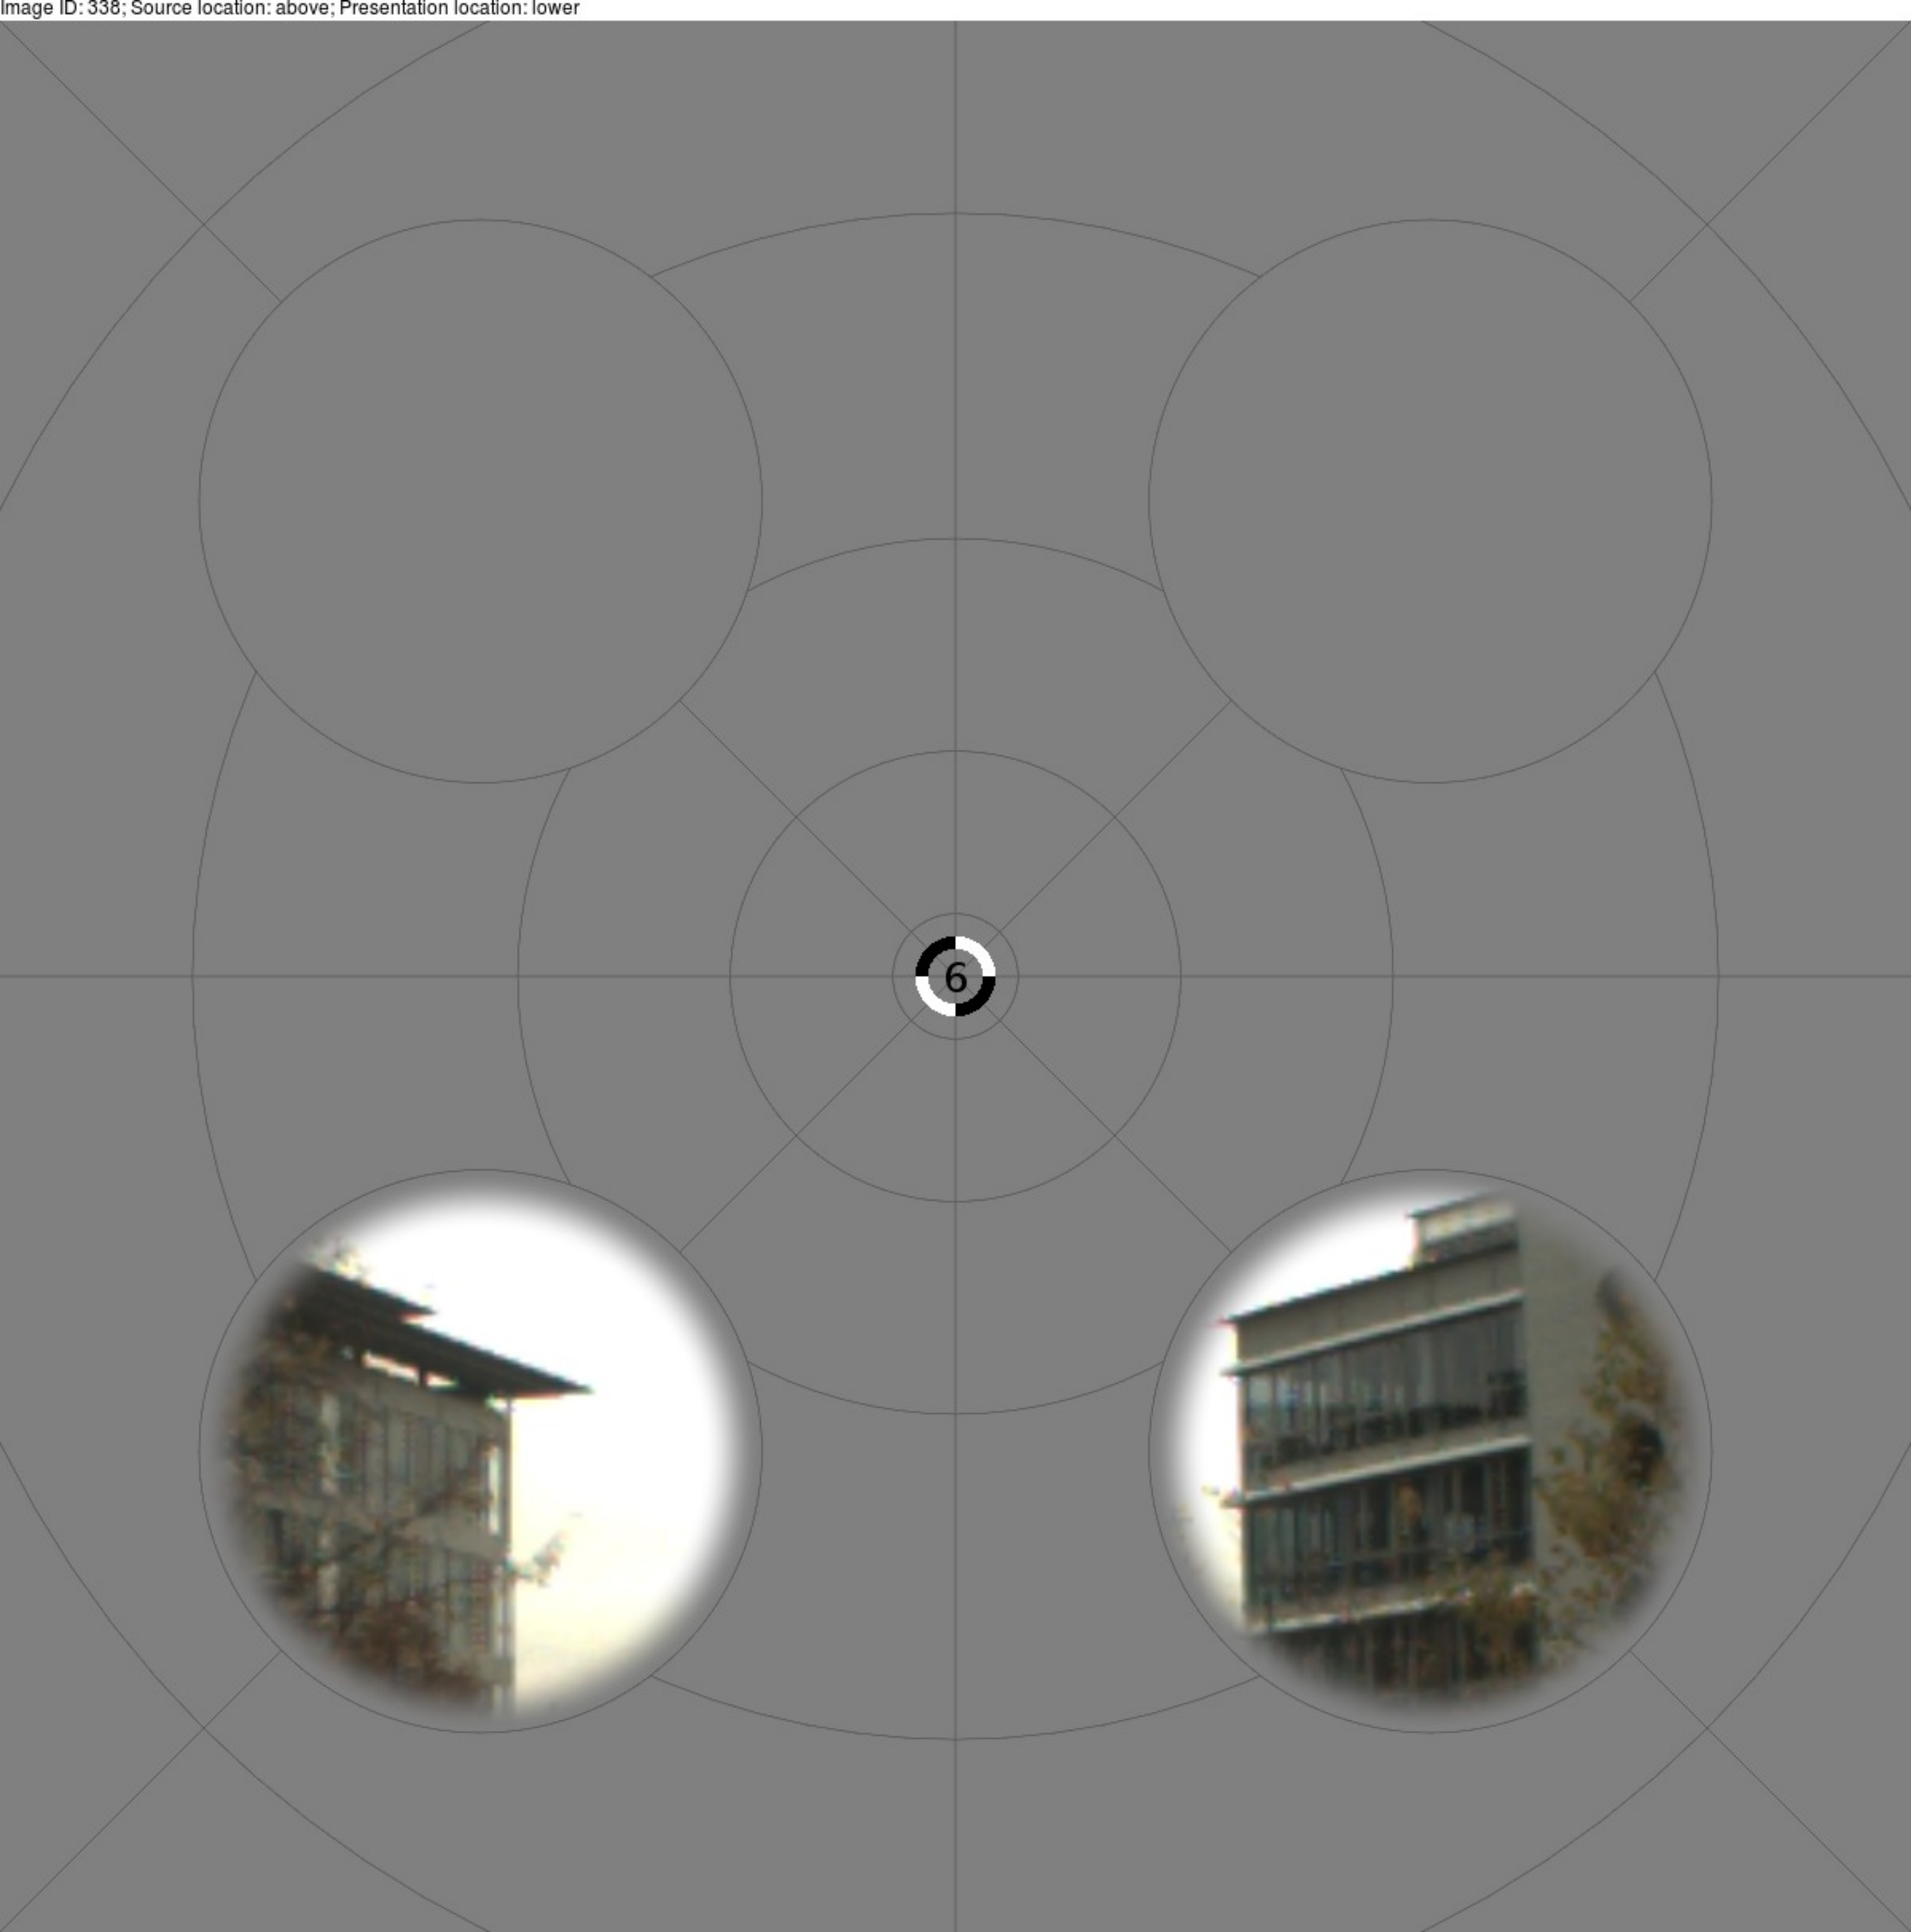



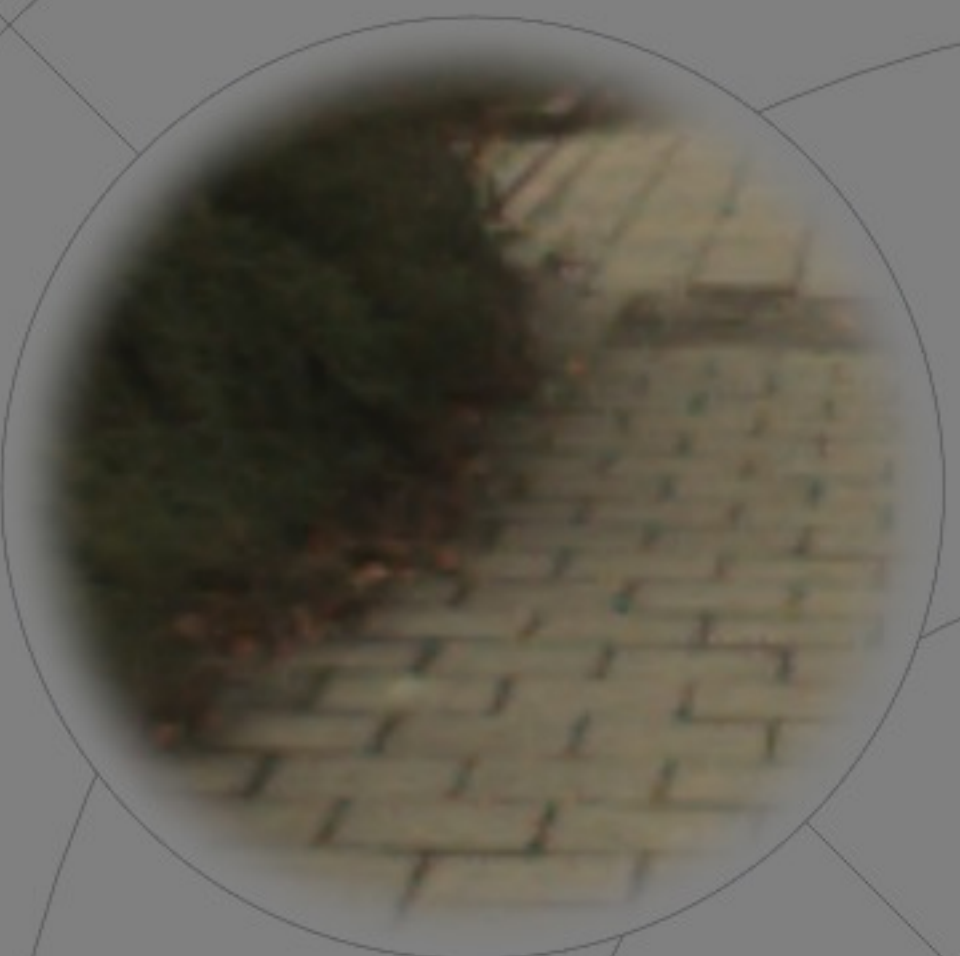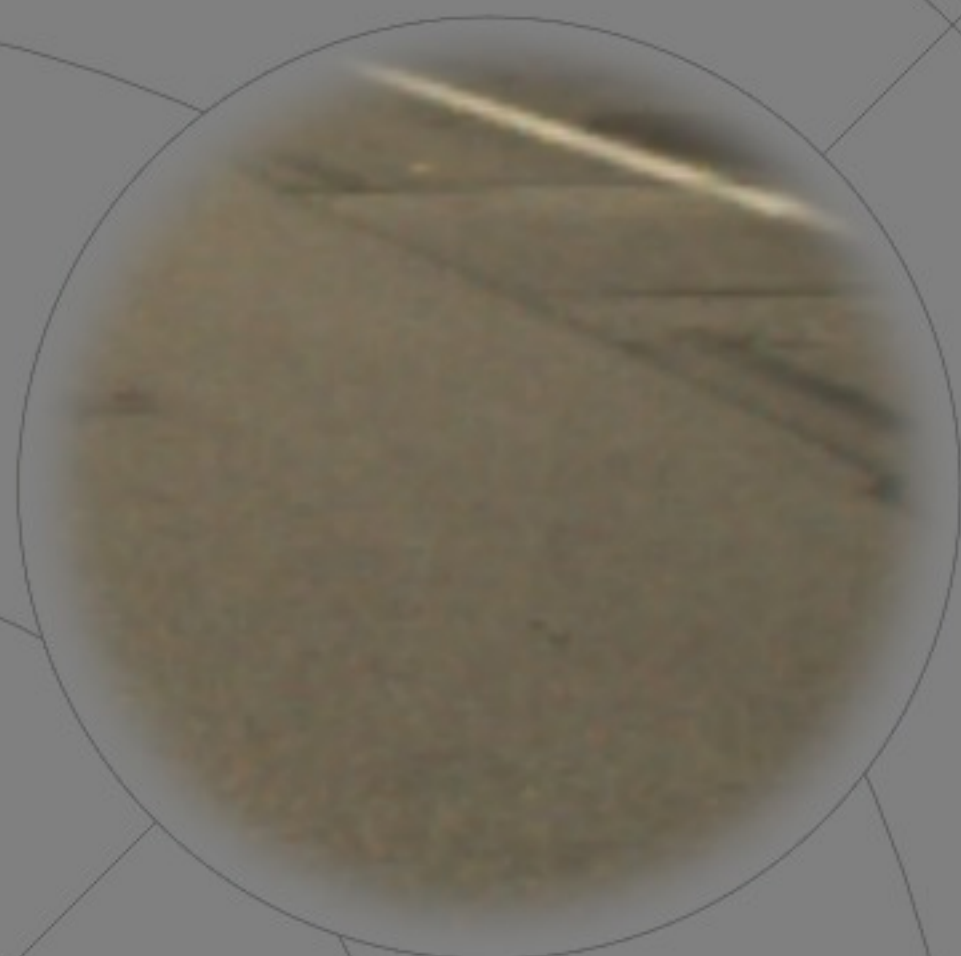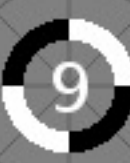

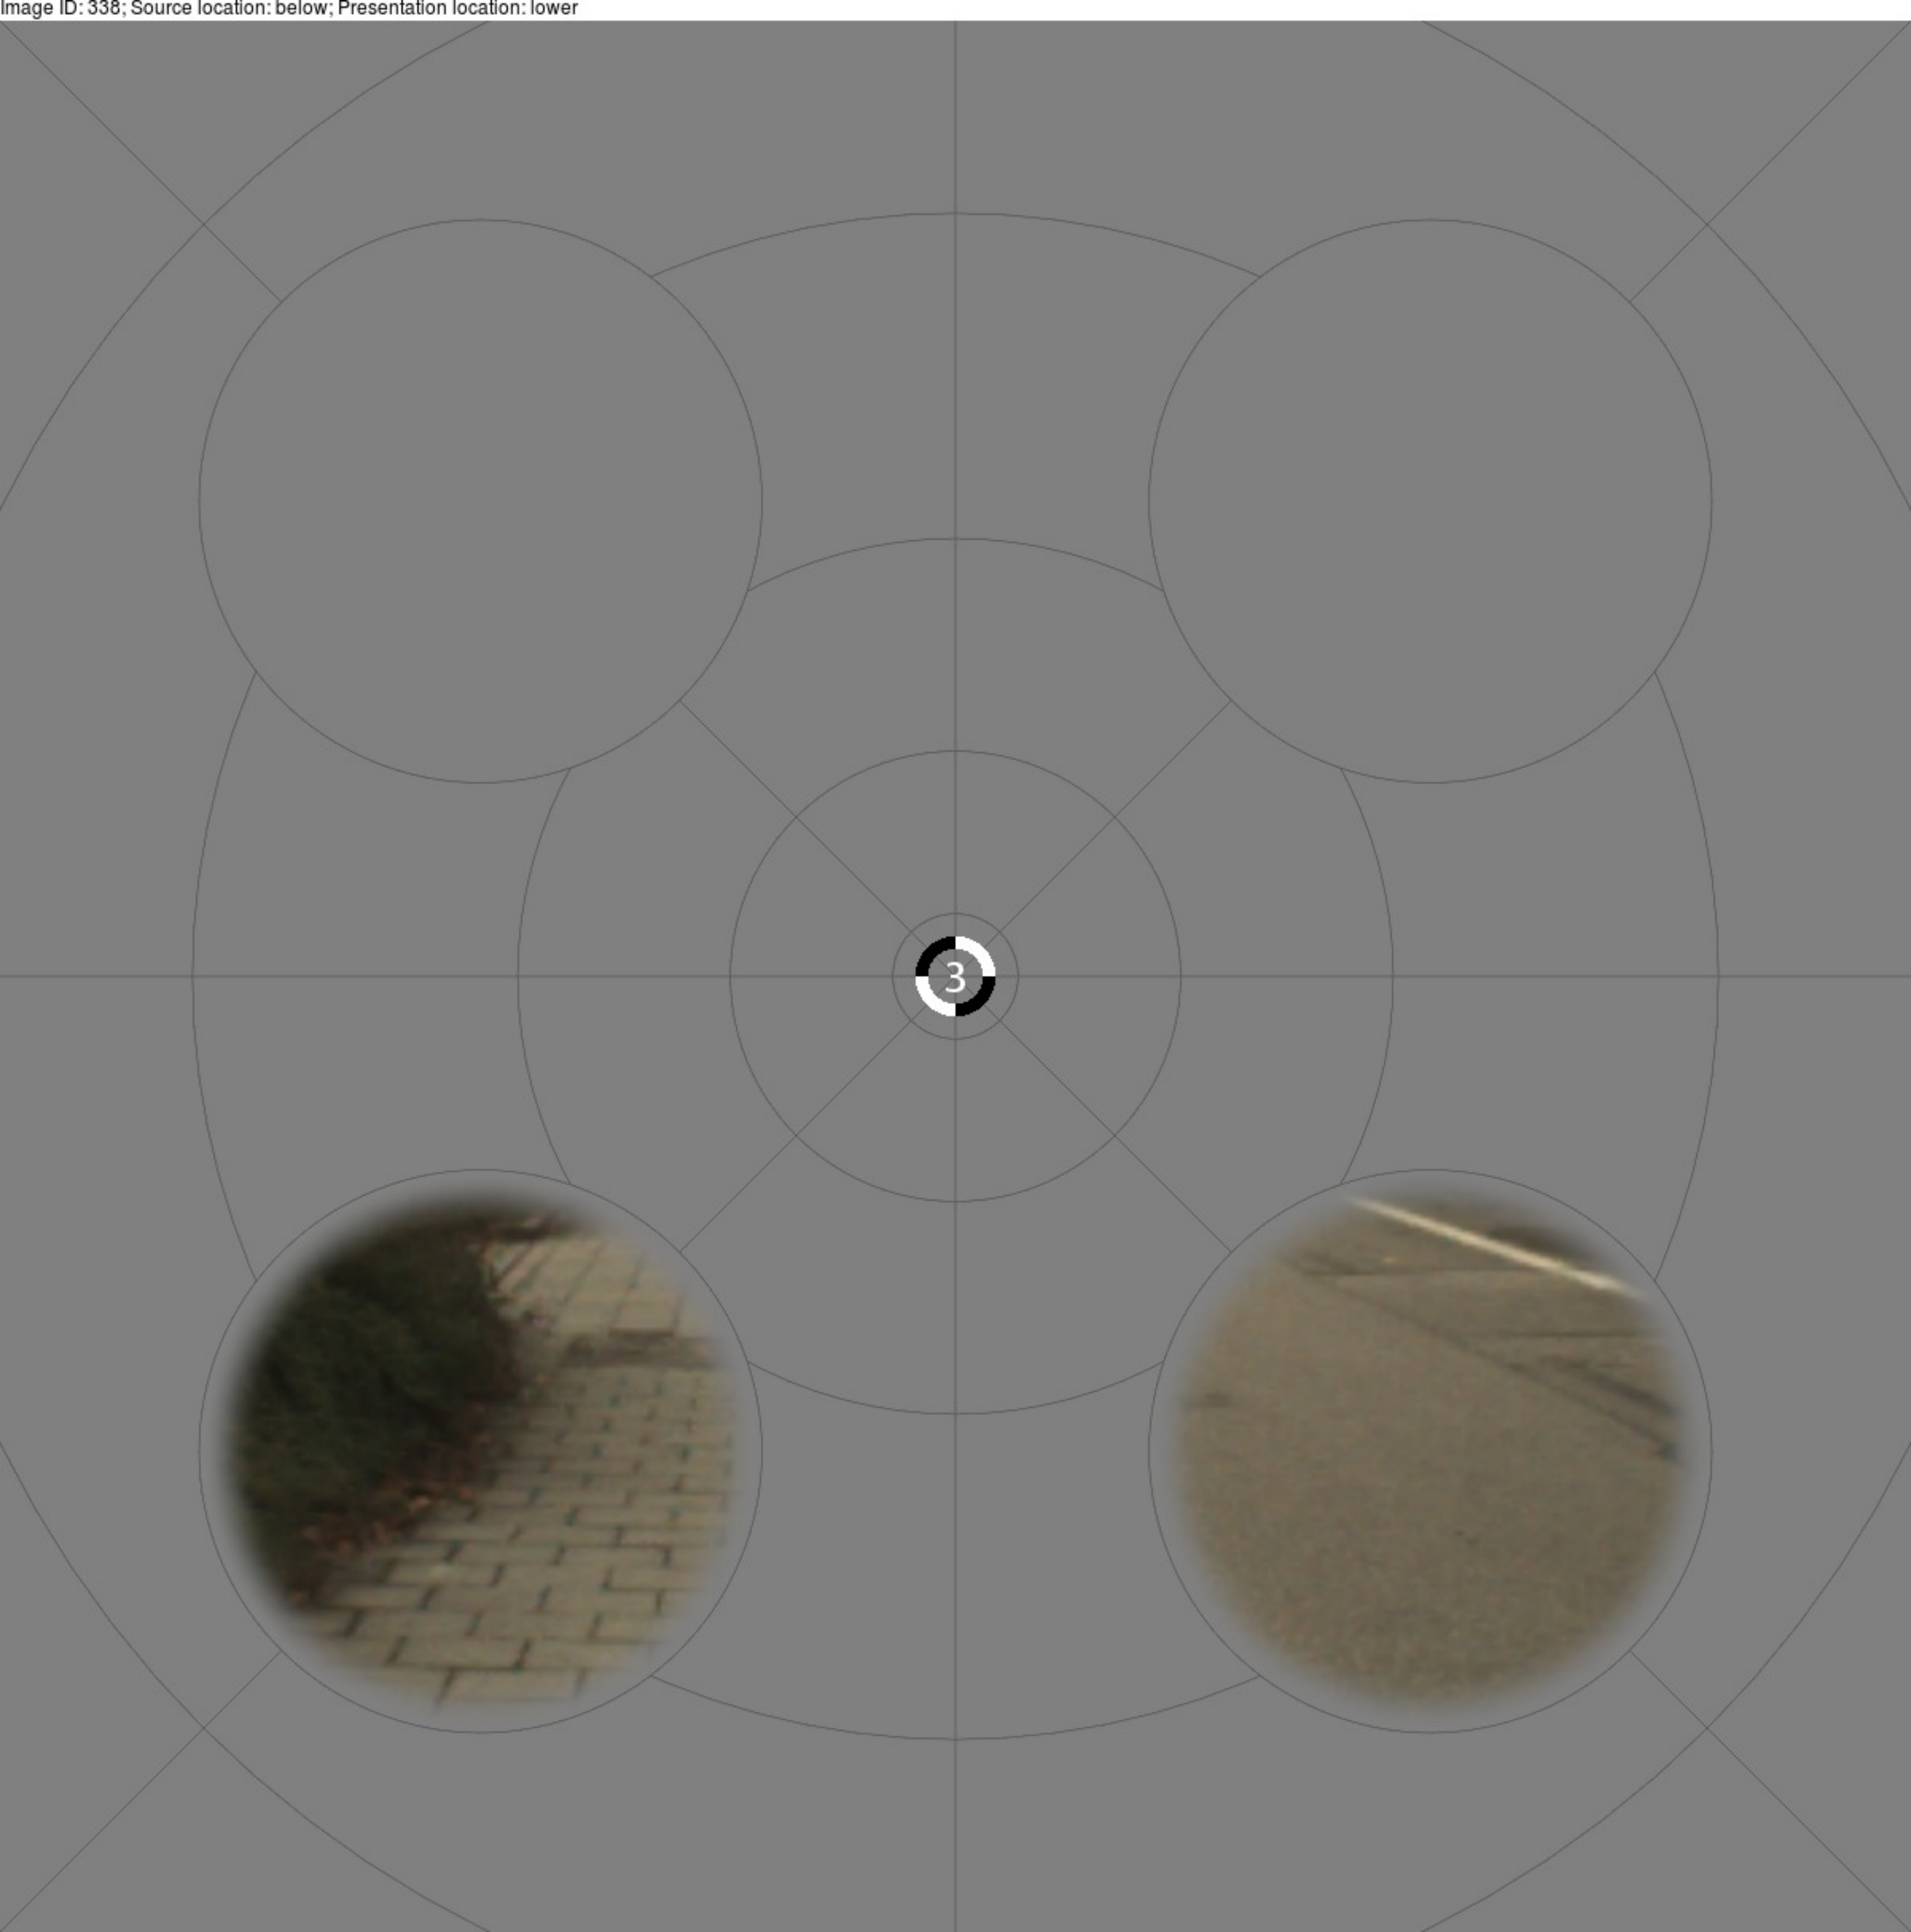

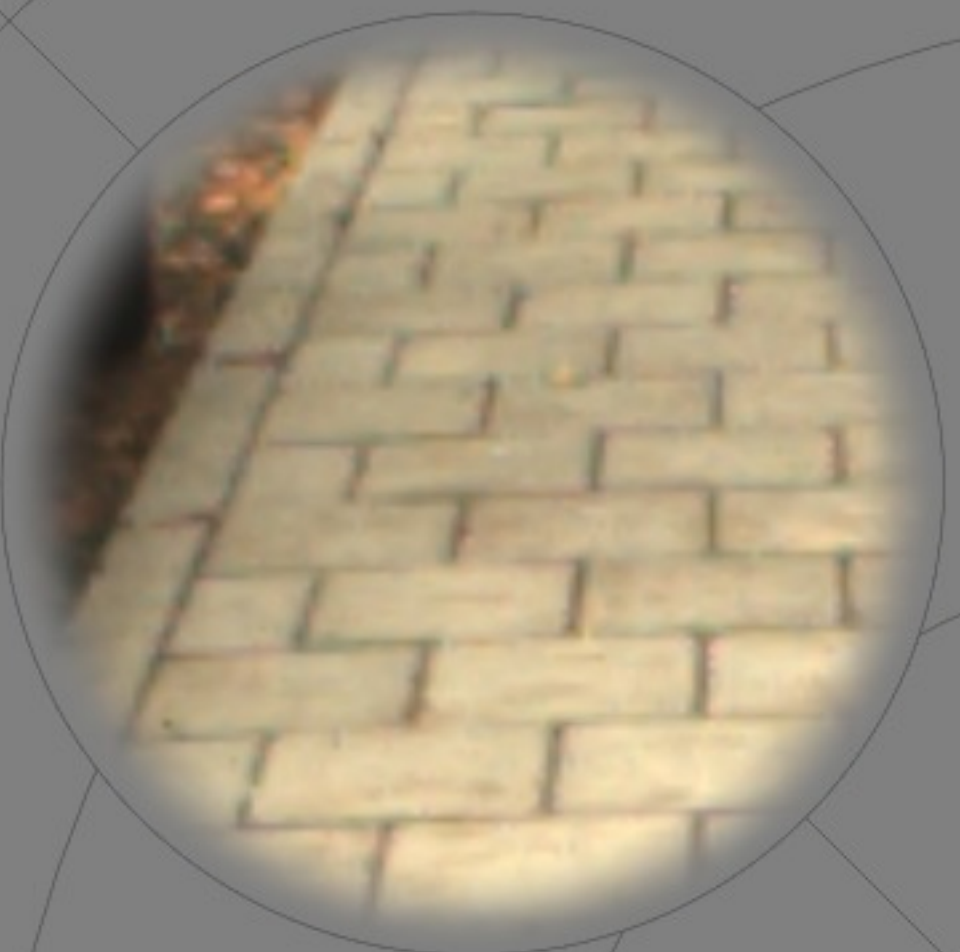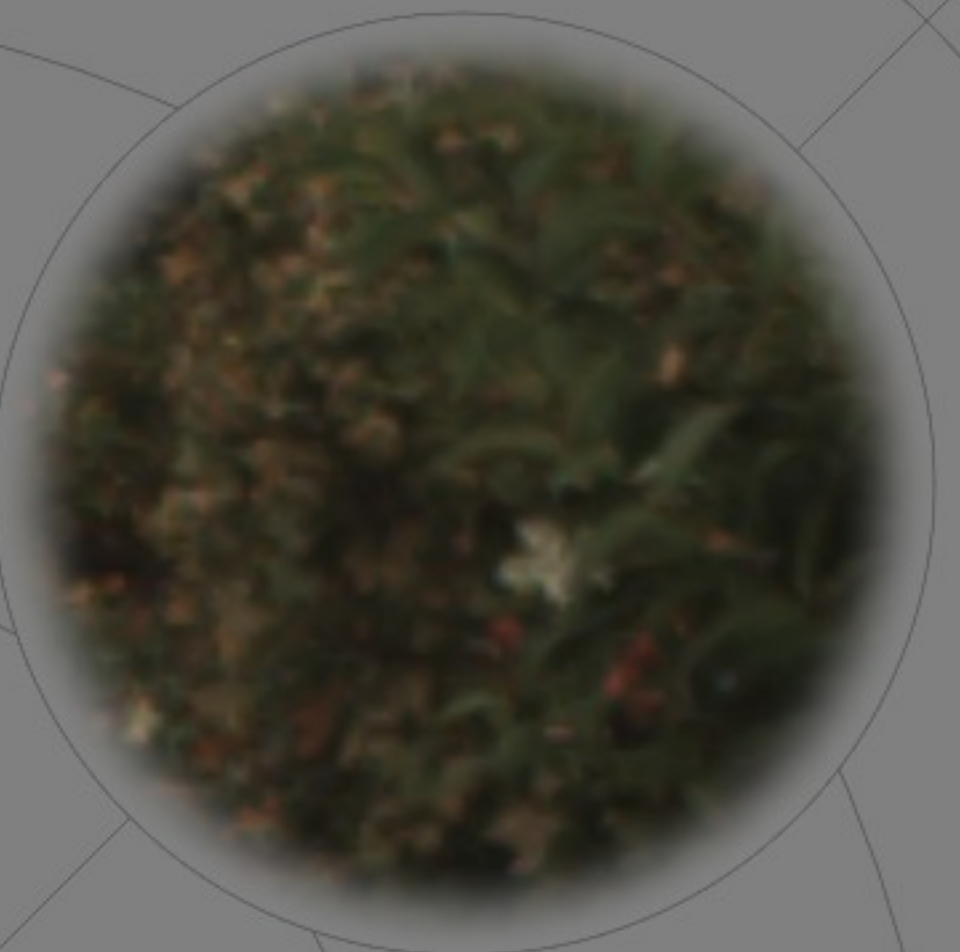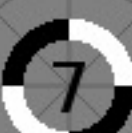



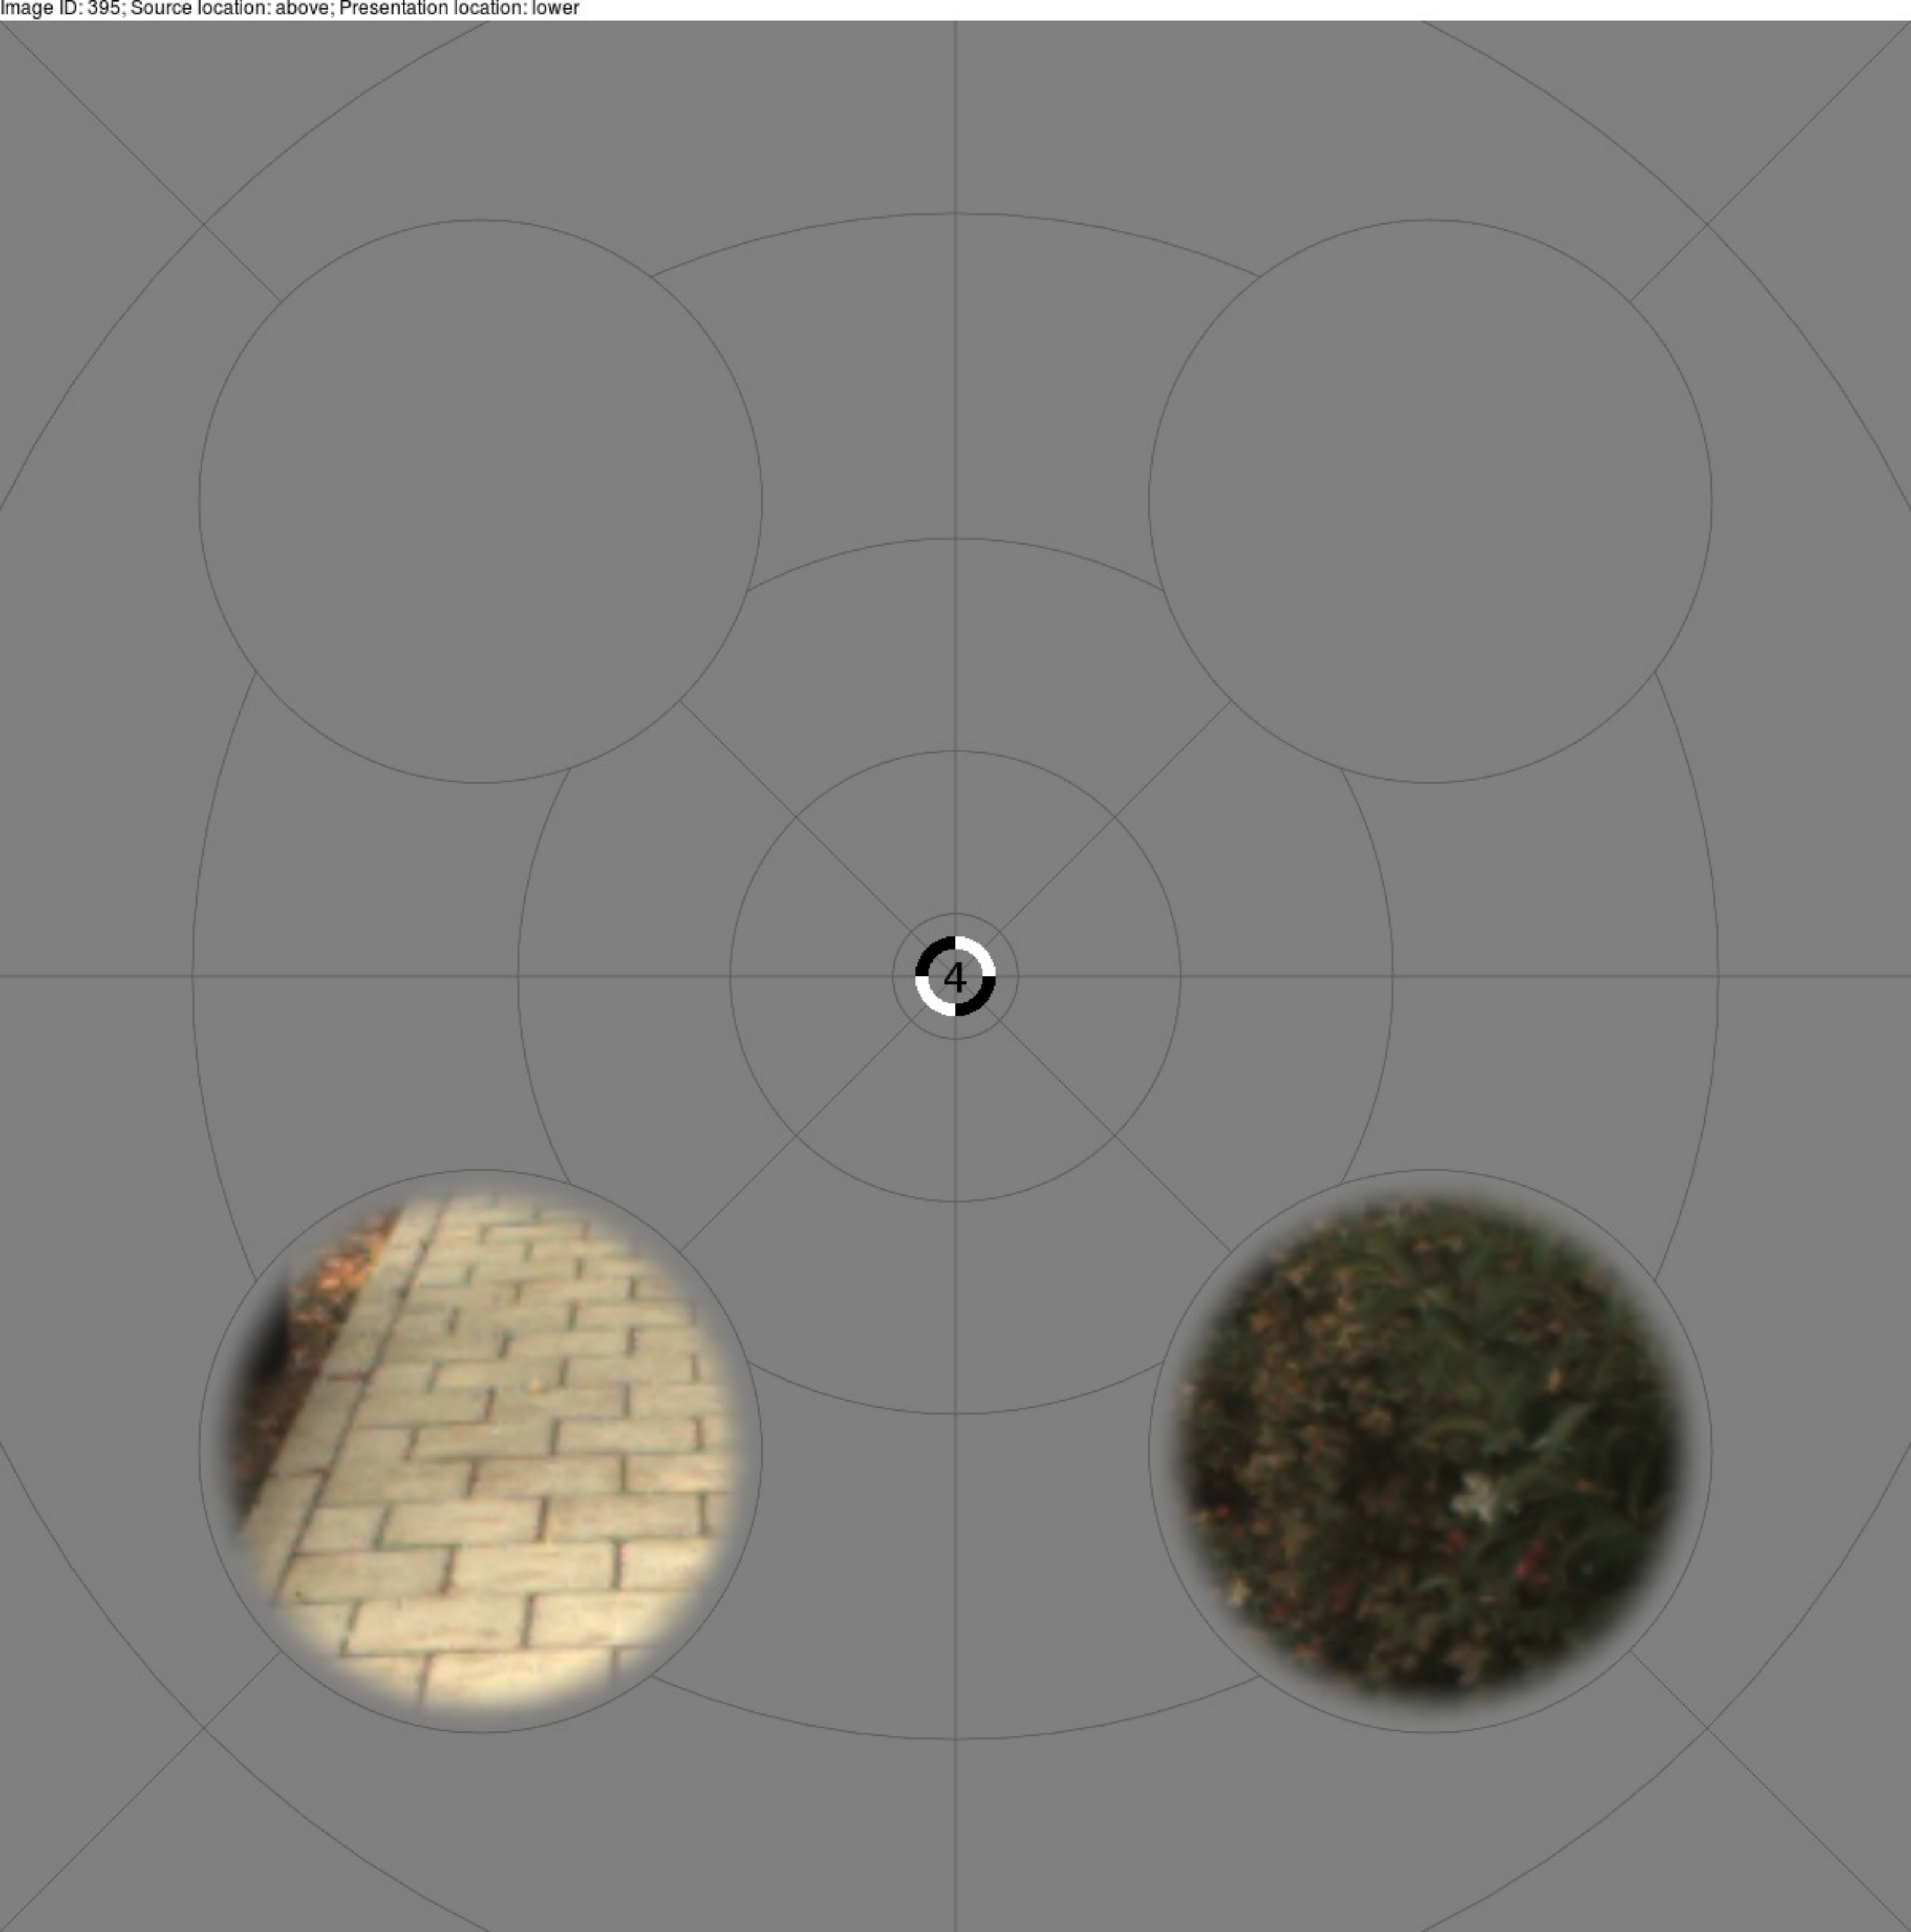

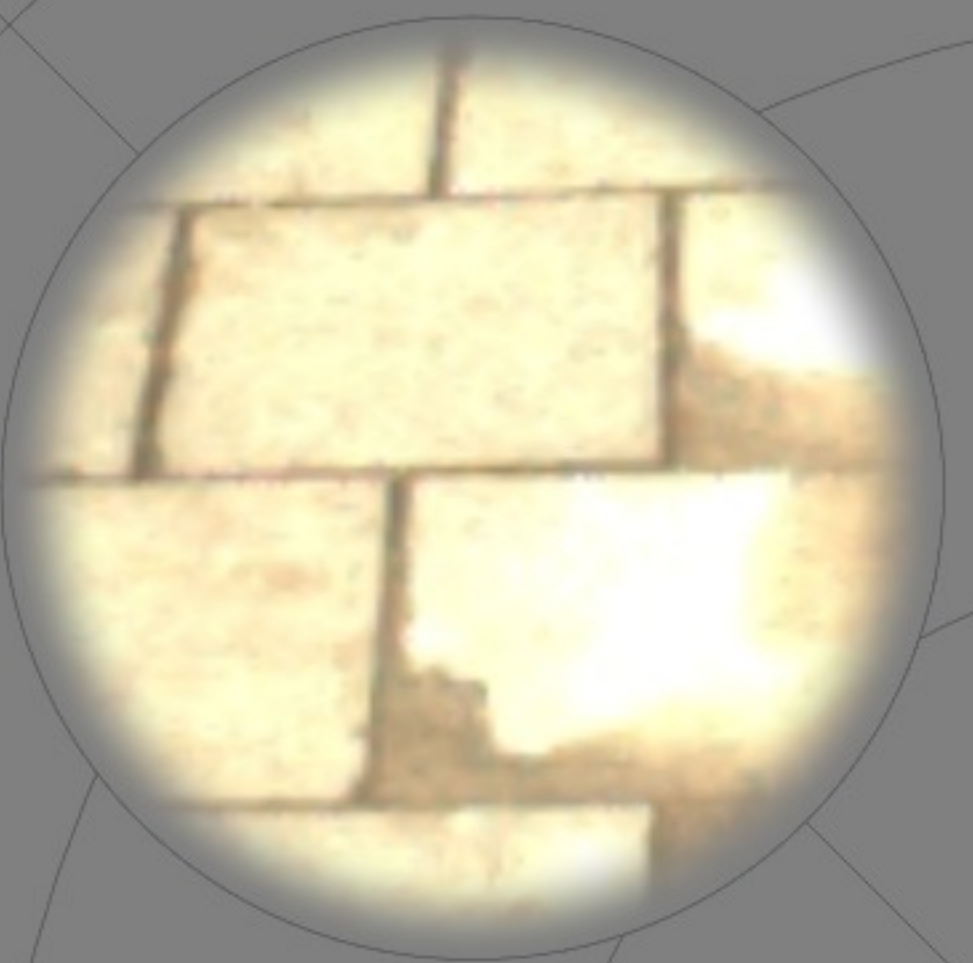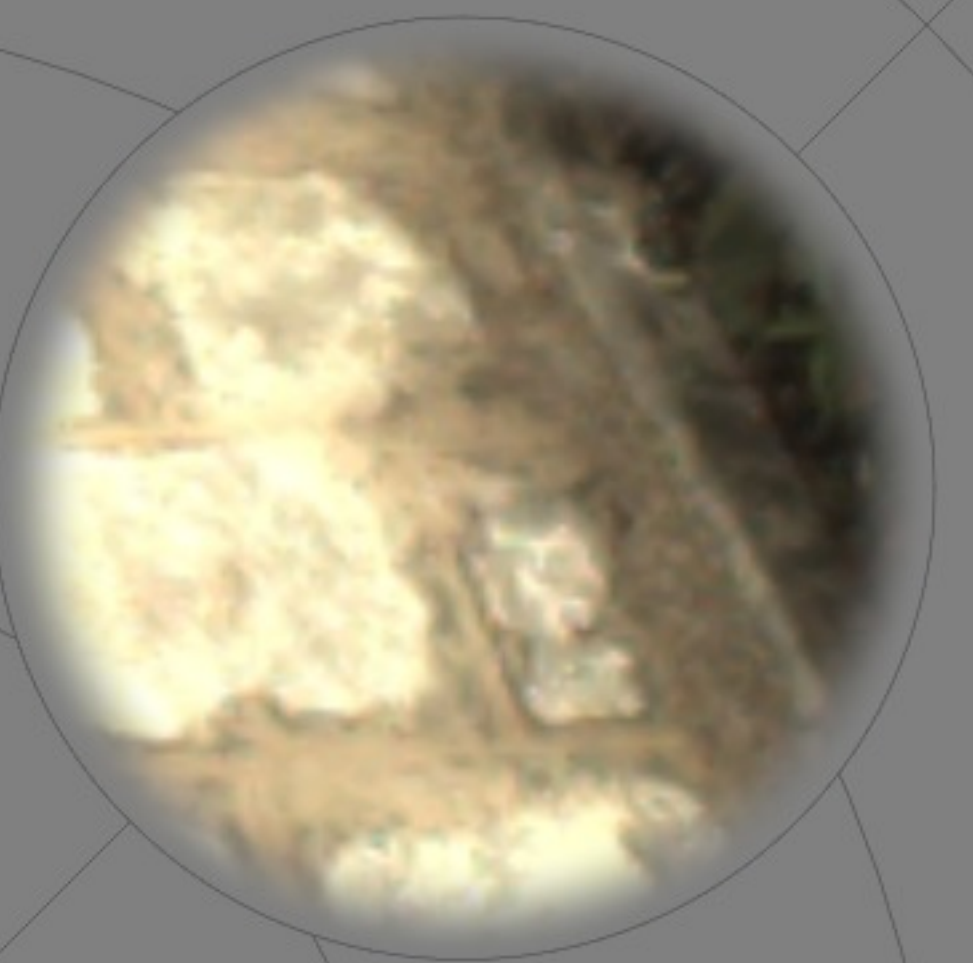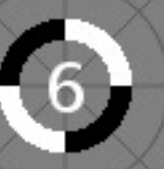

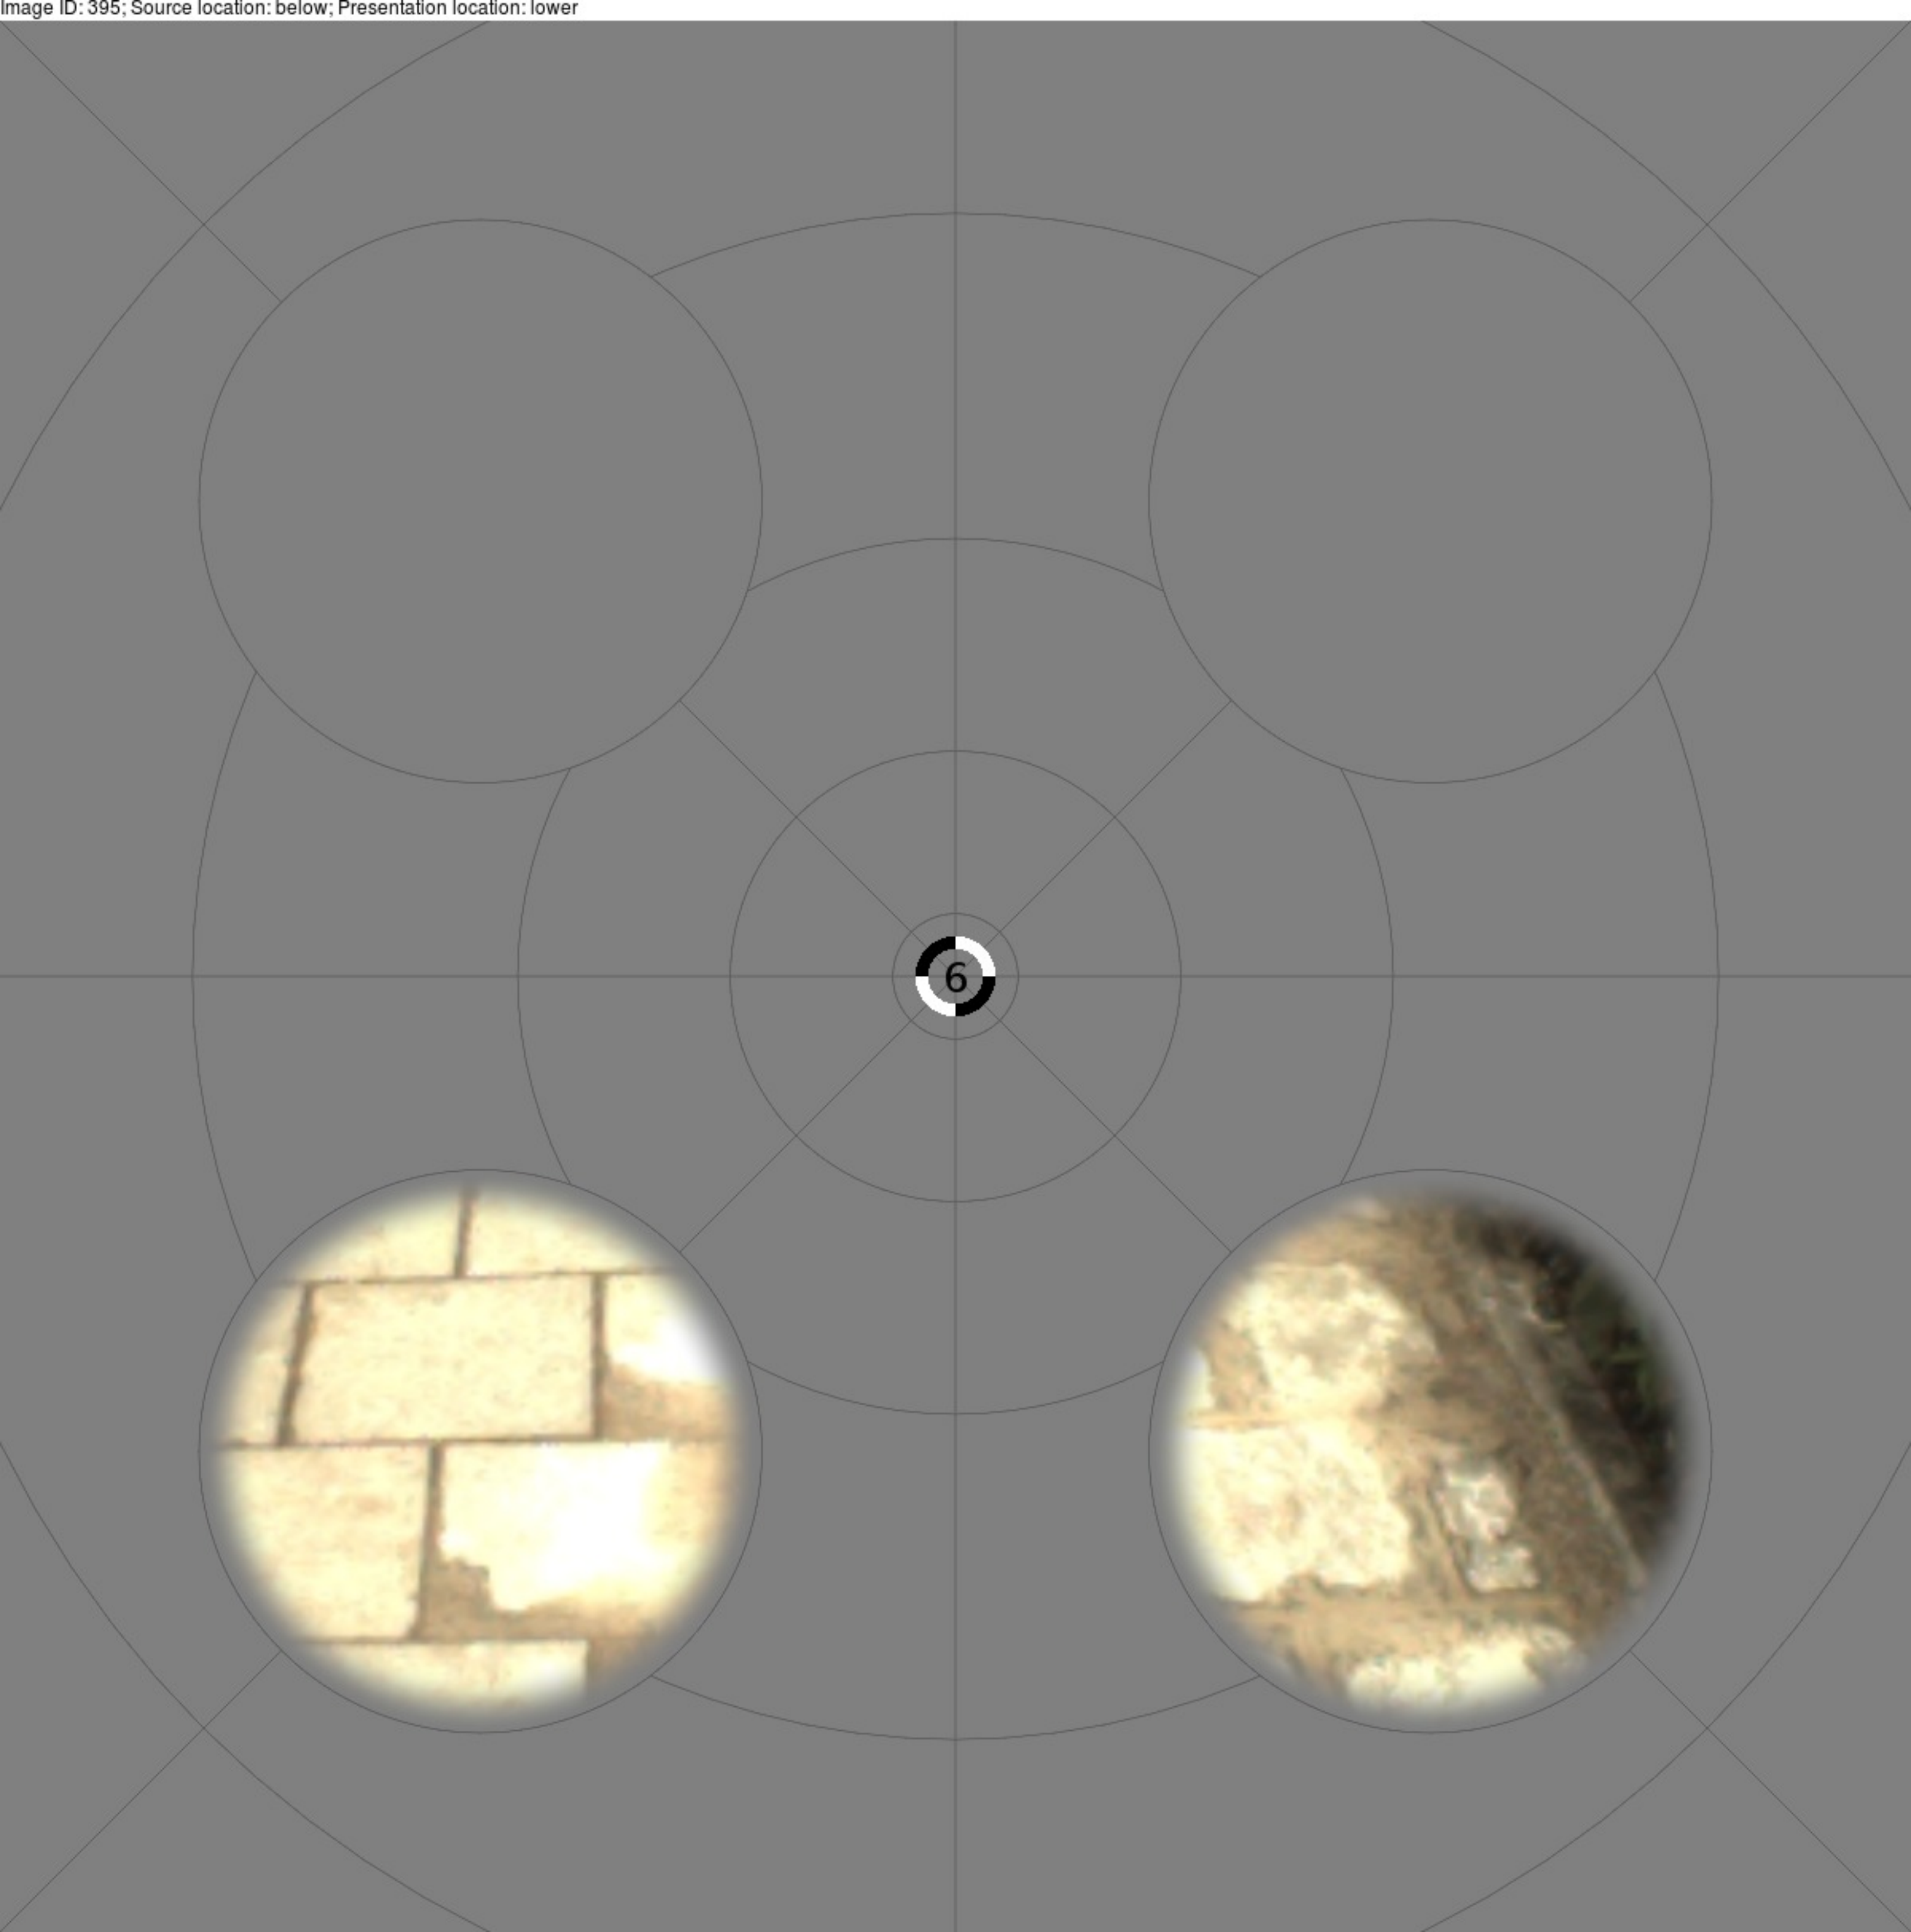



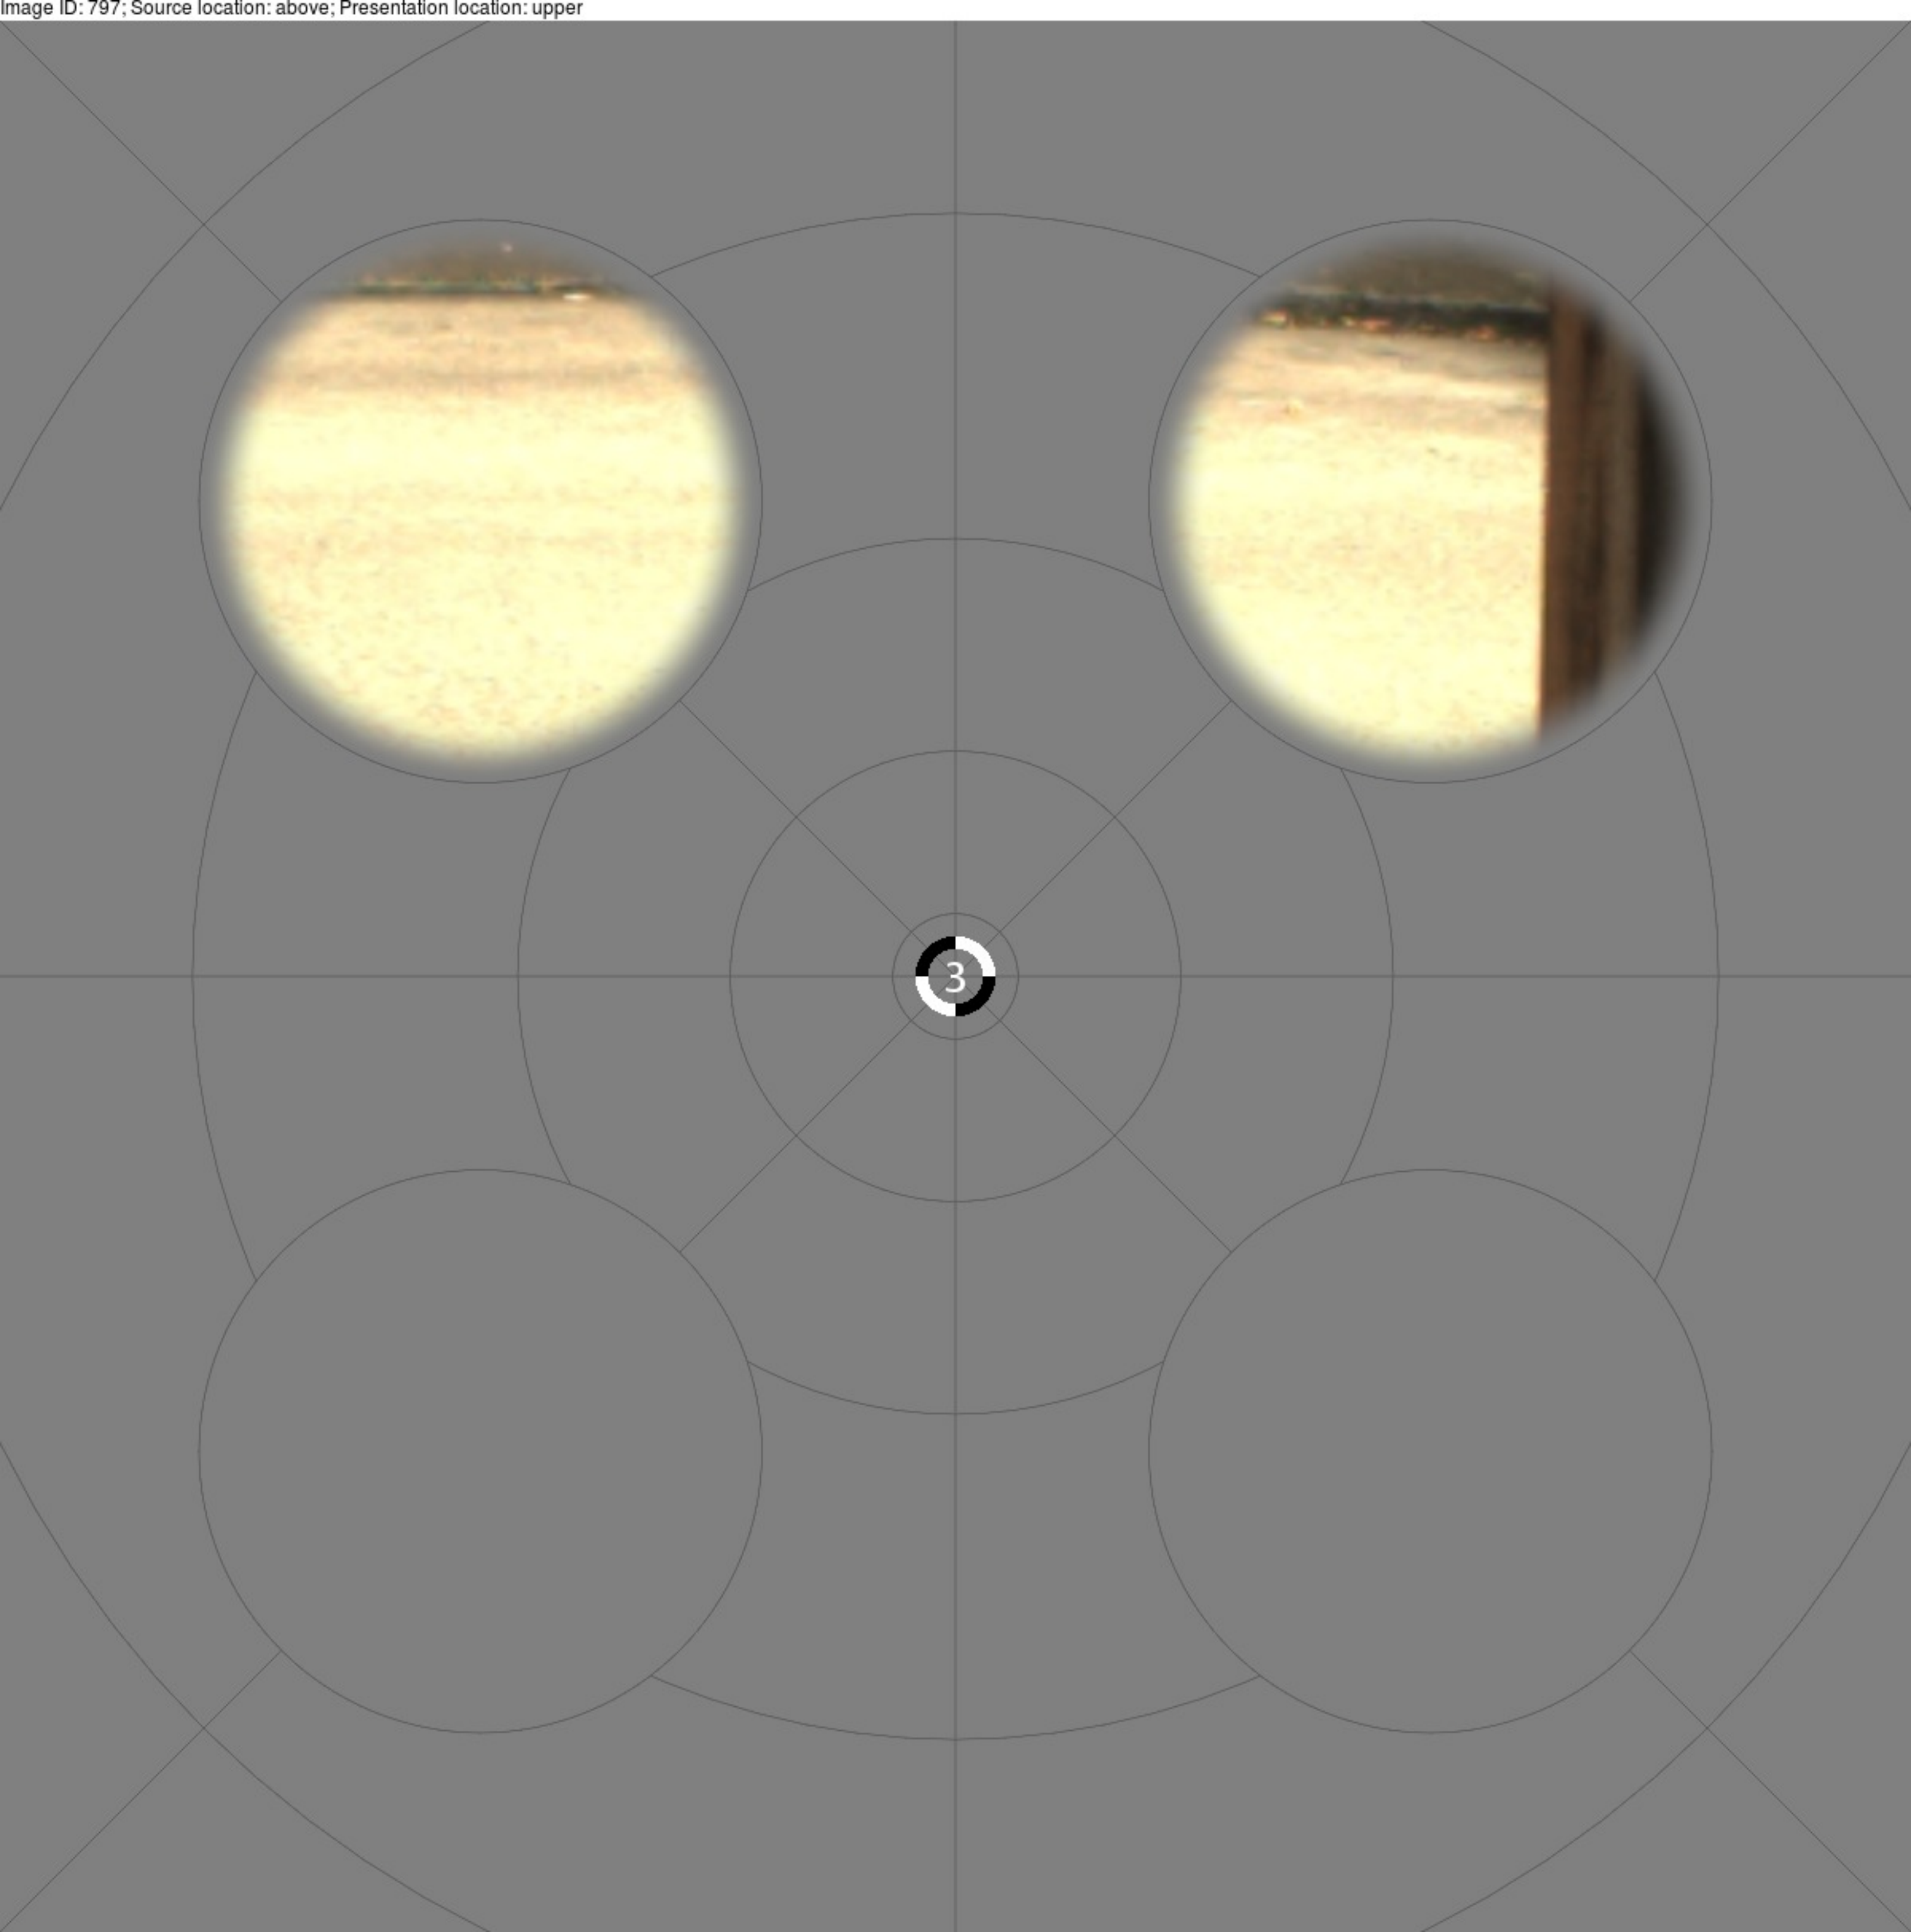

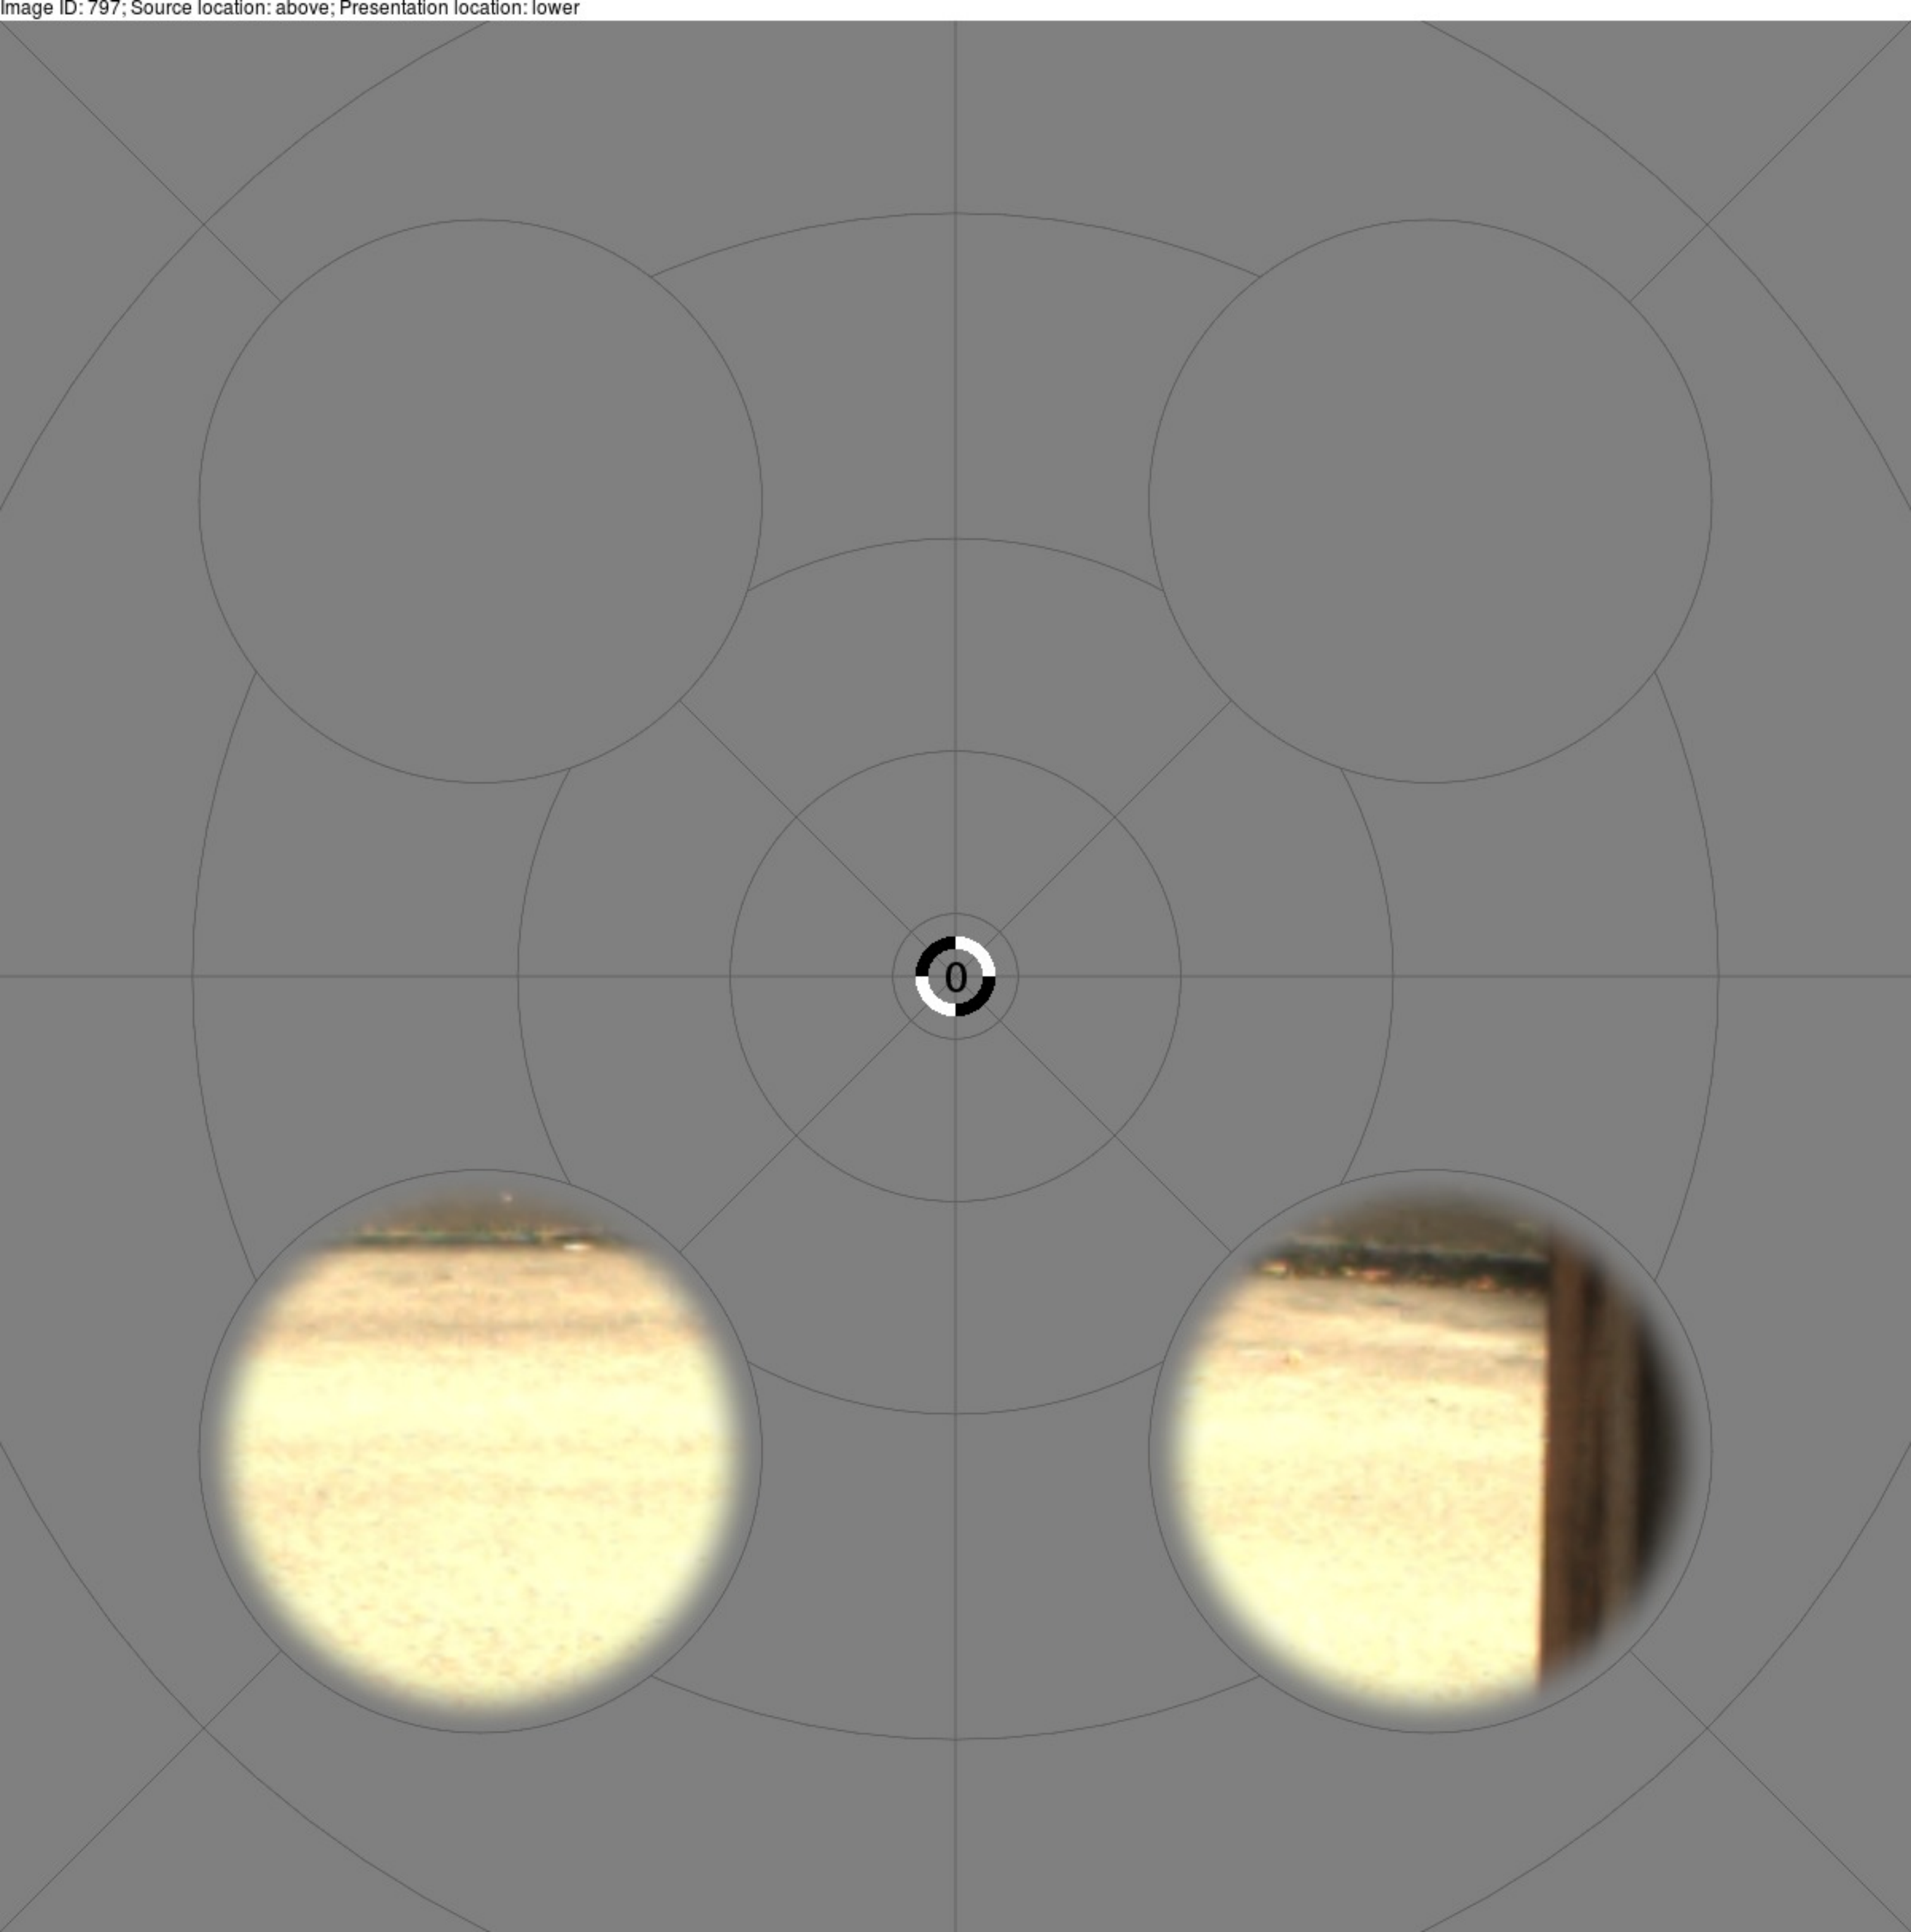

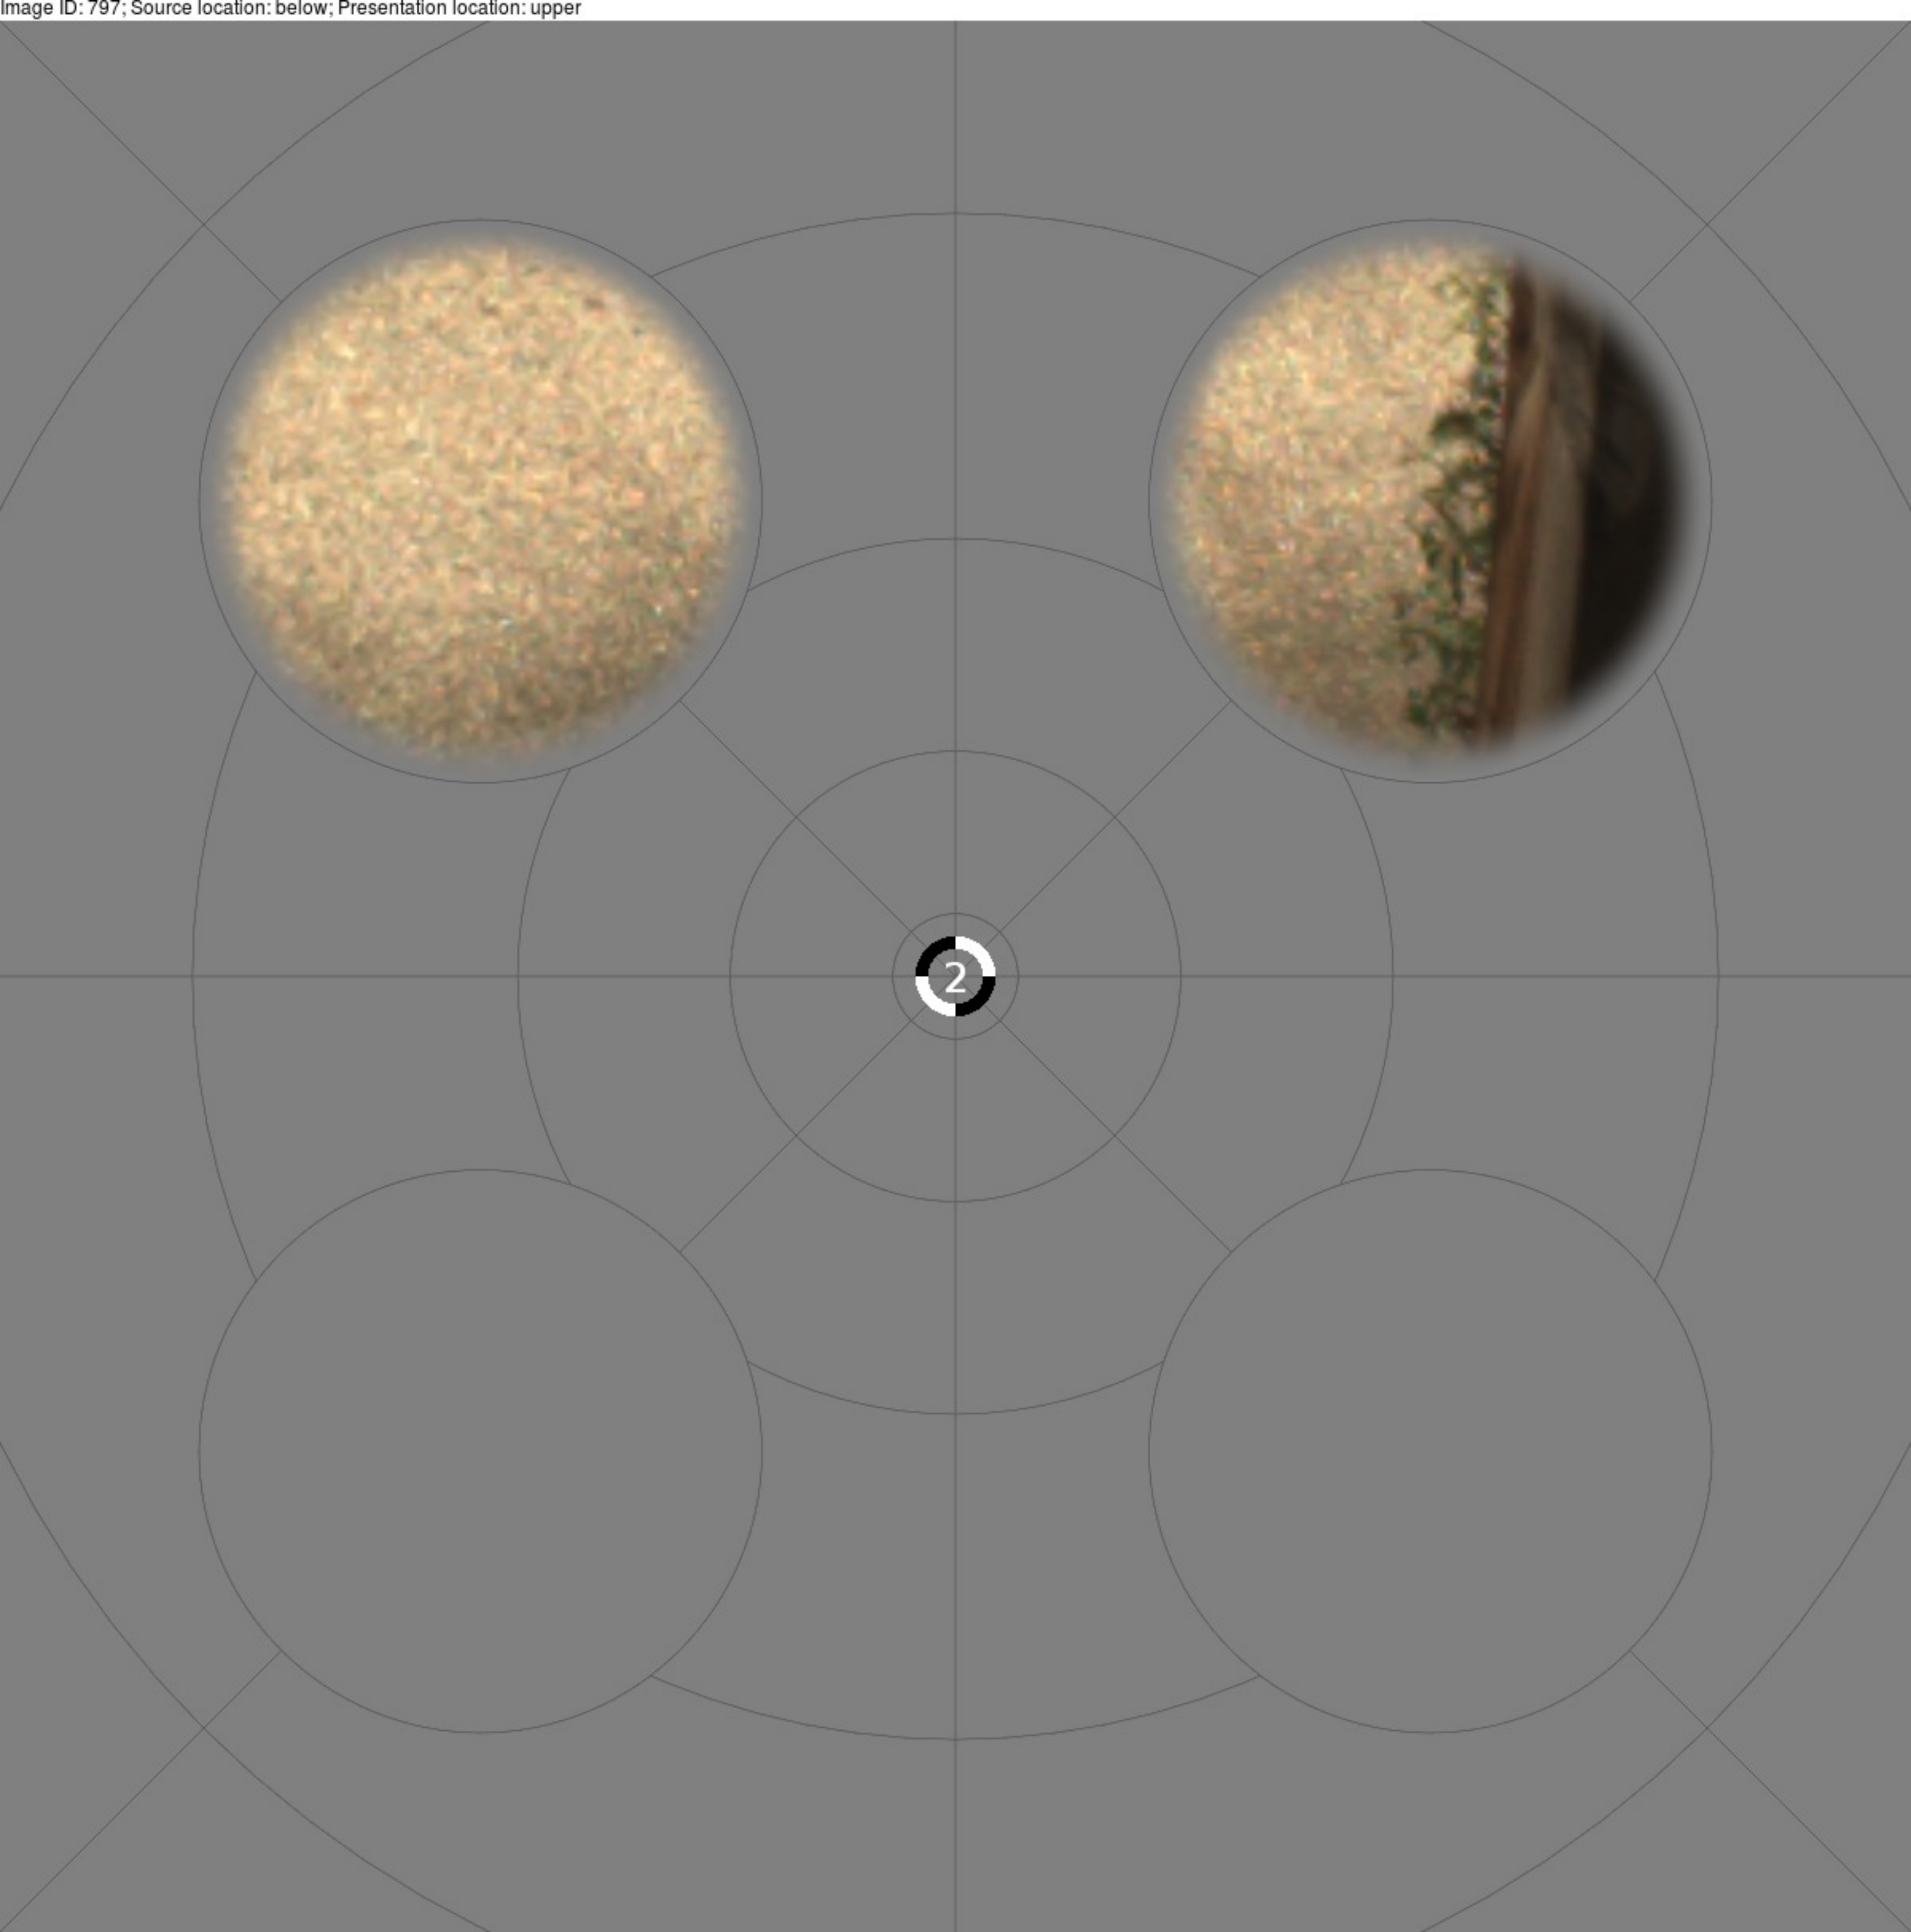



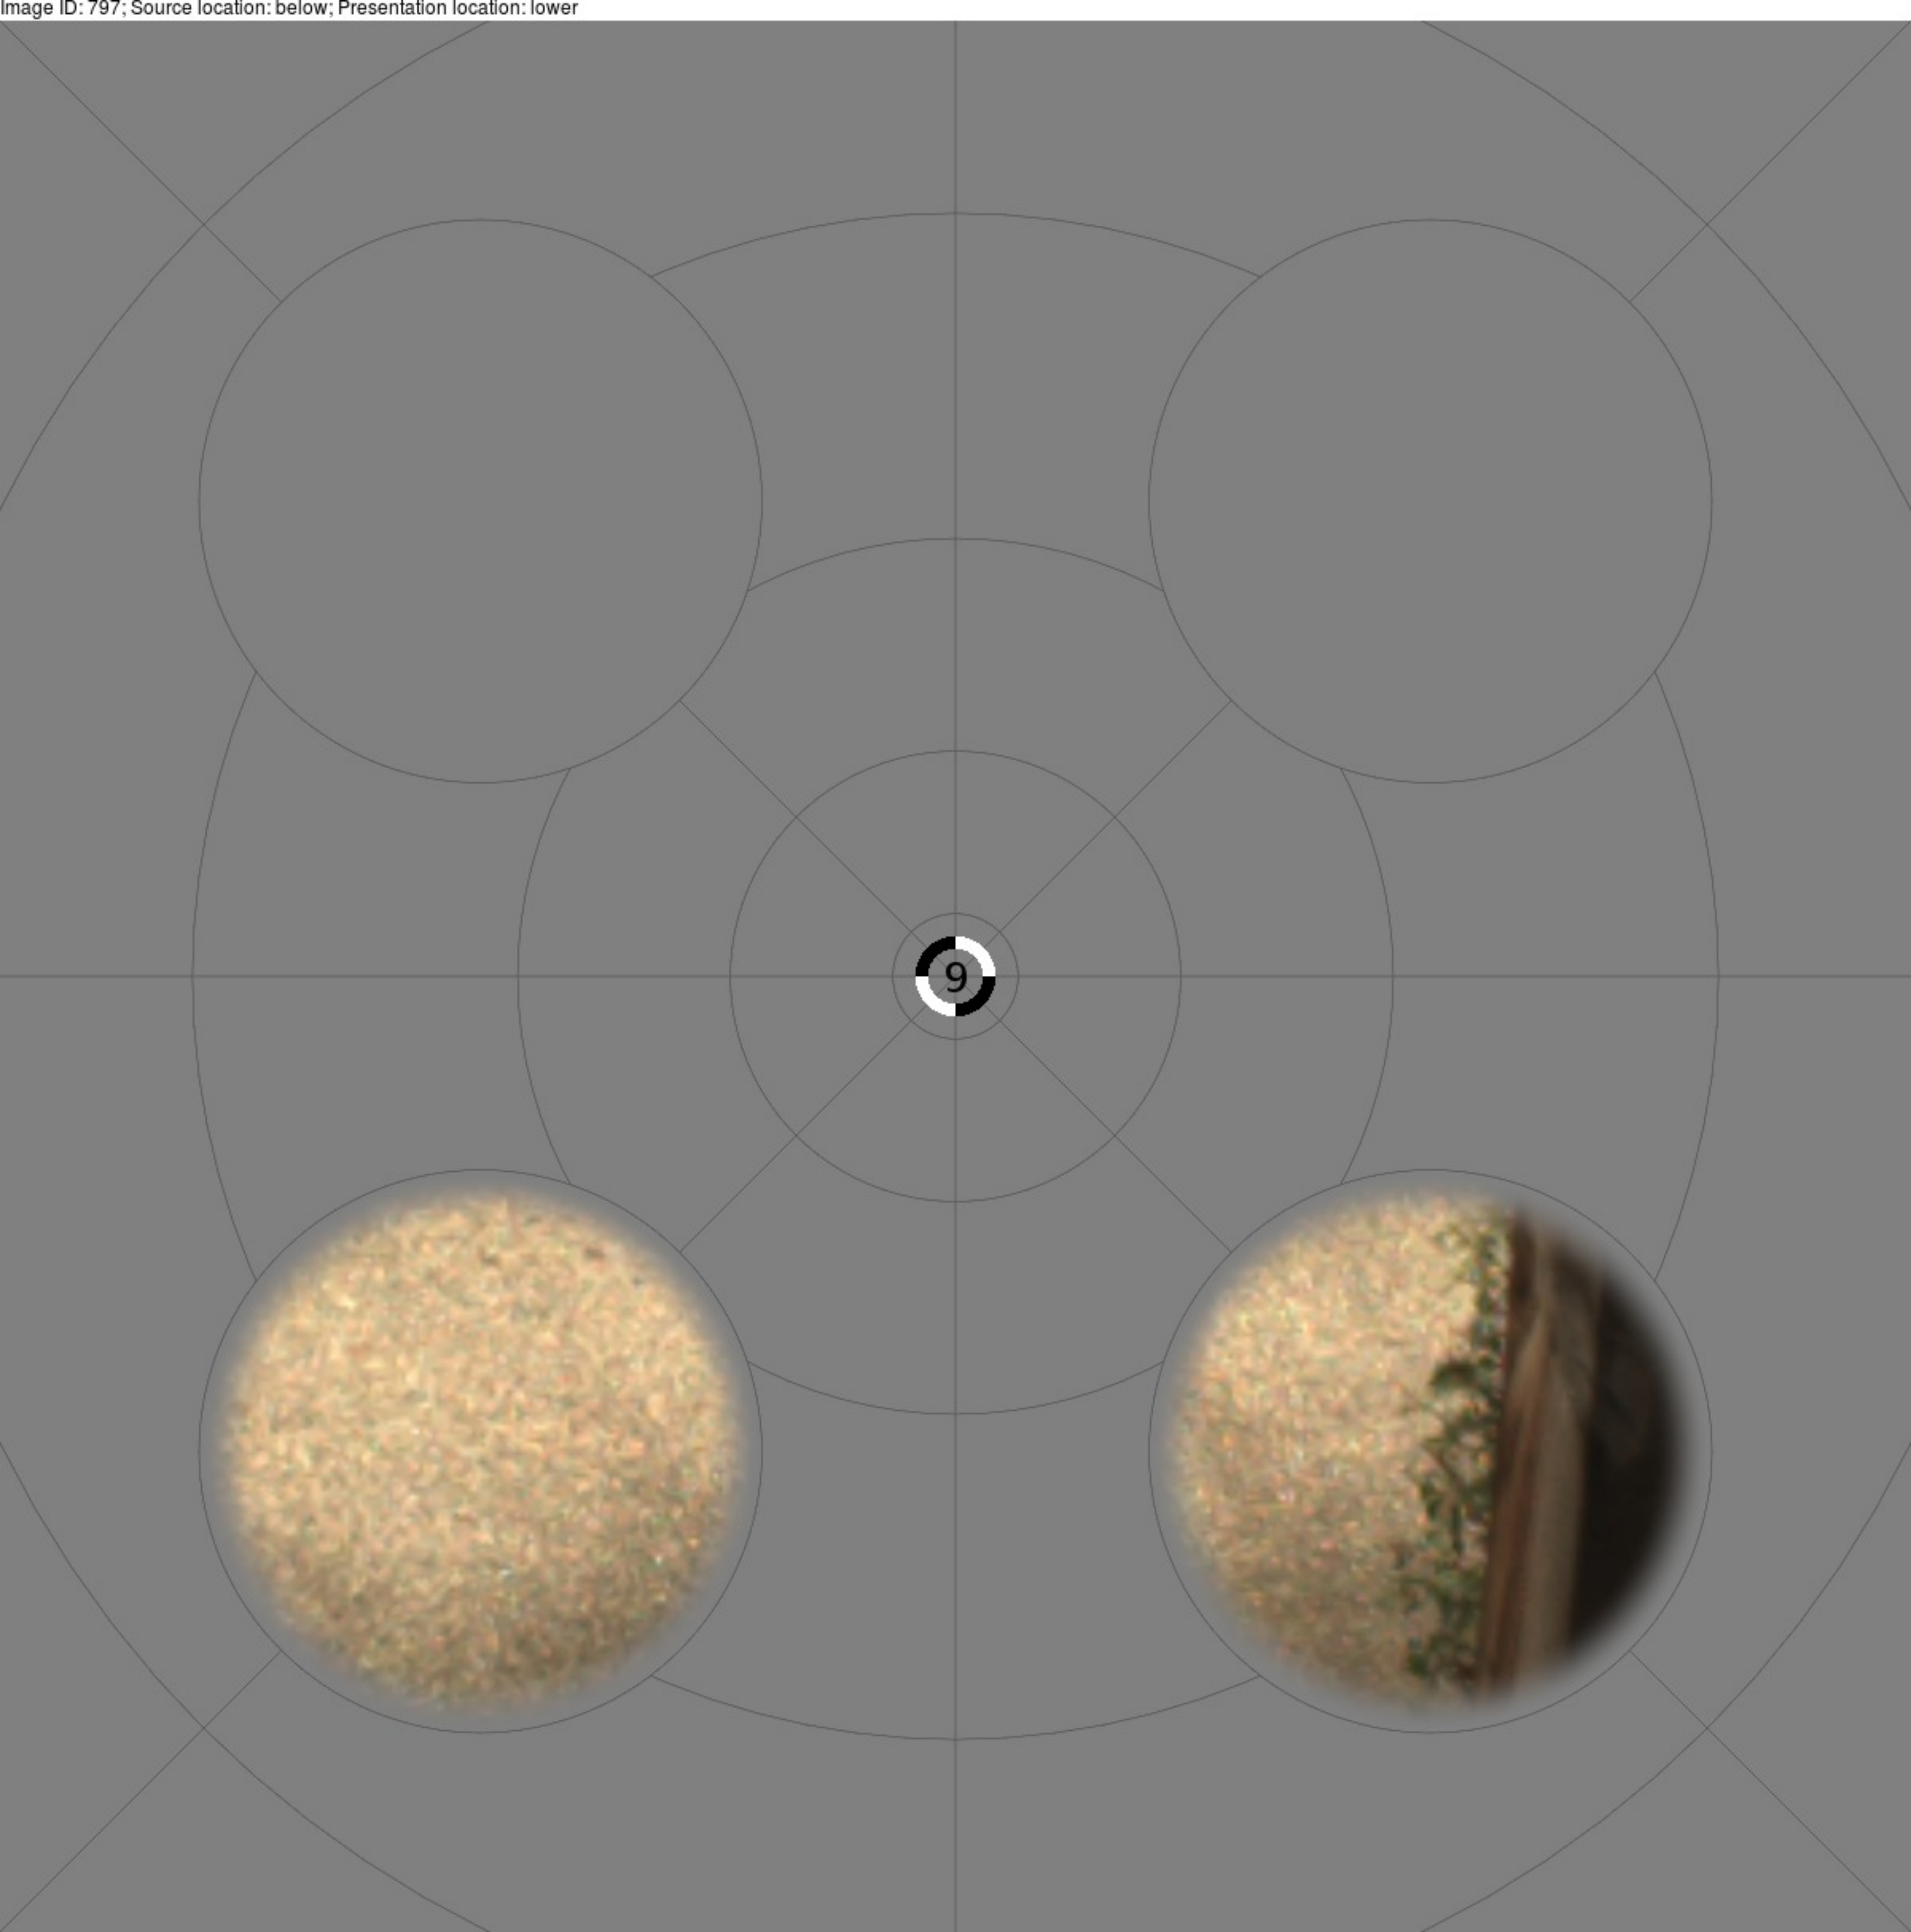

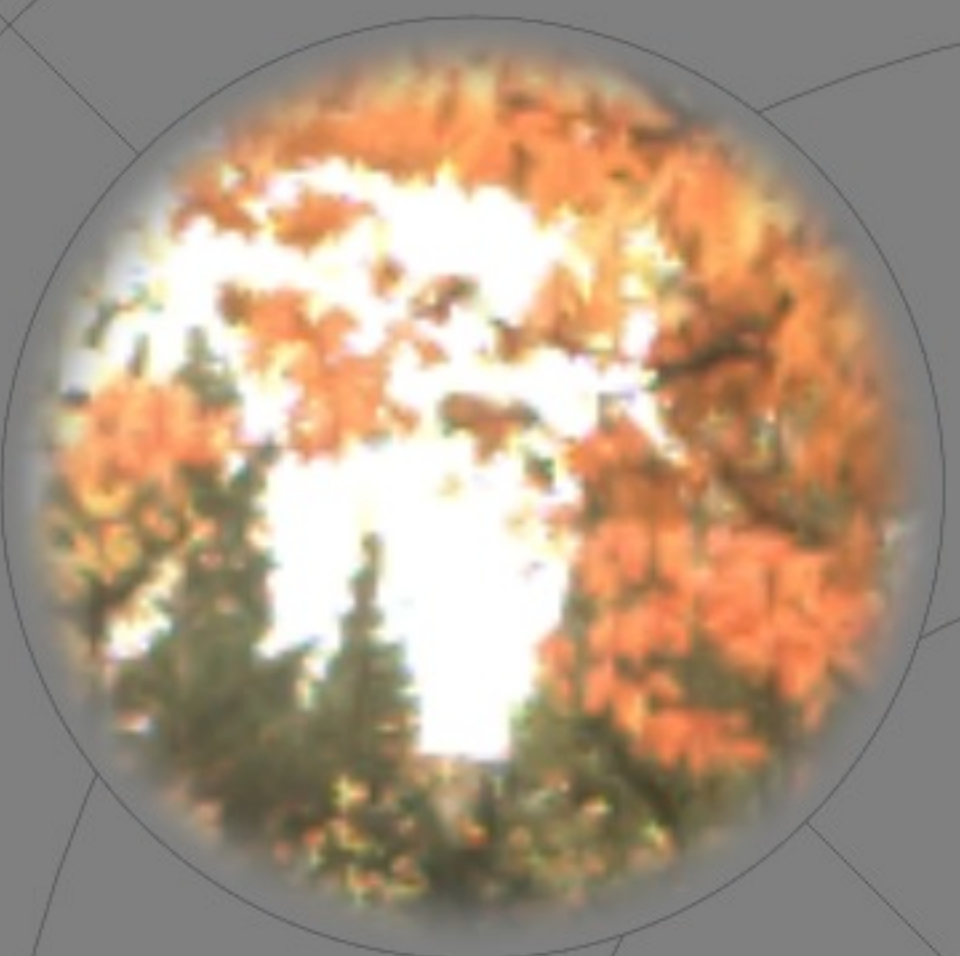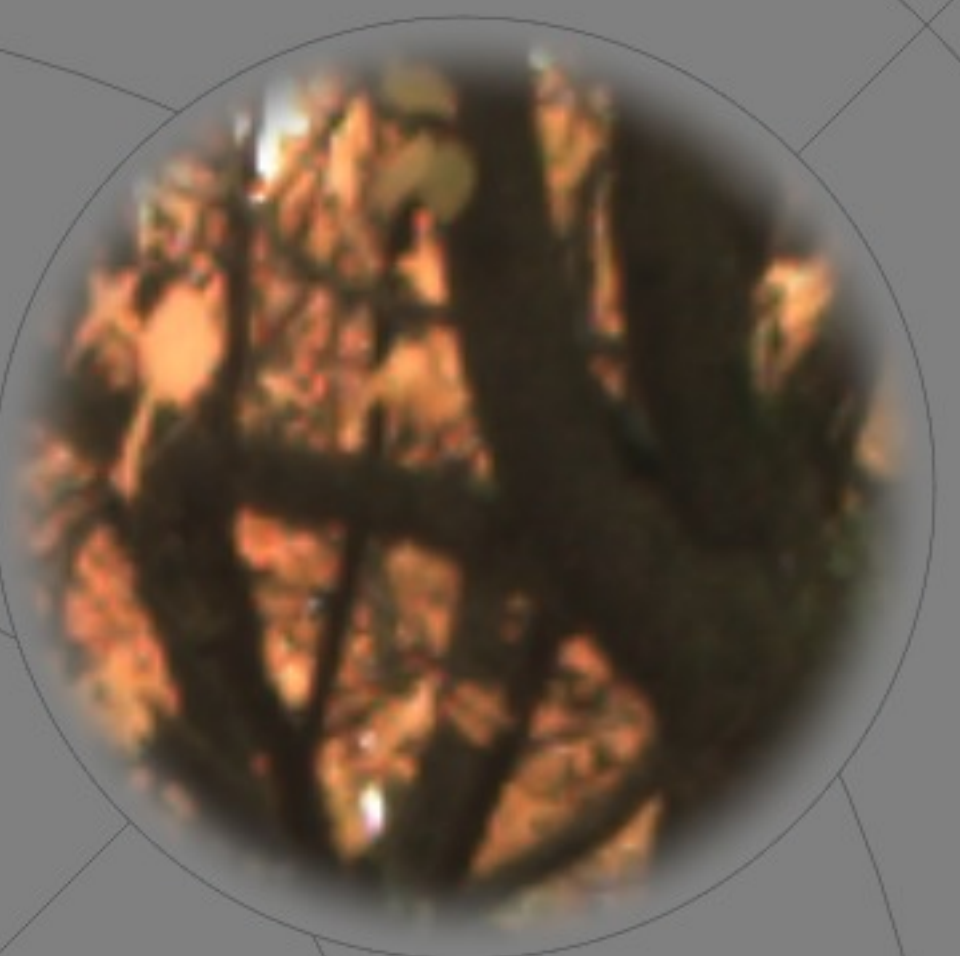

1



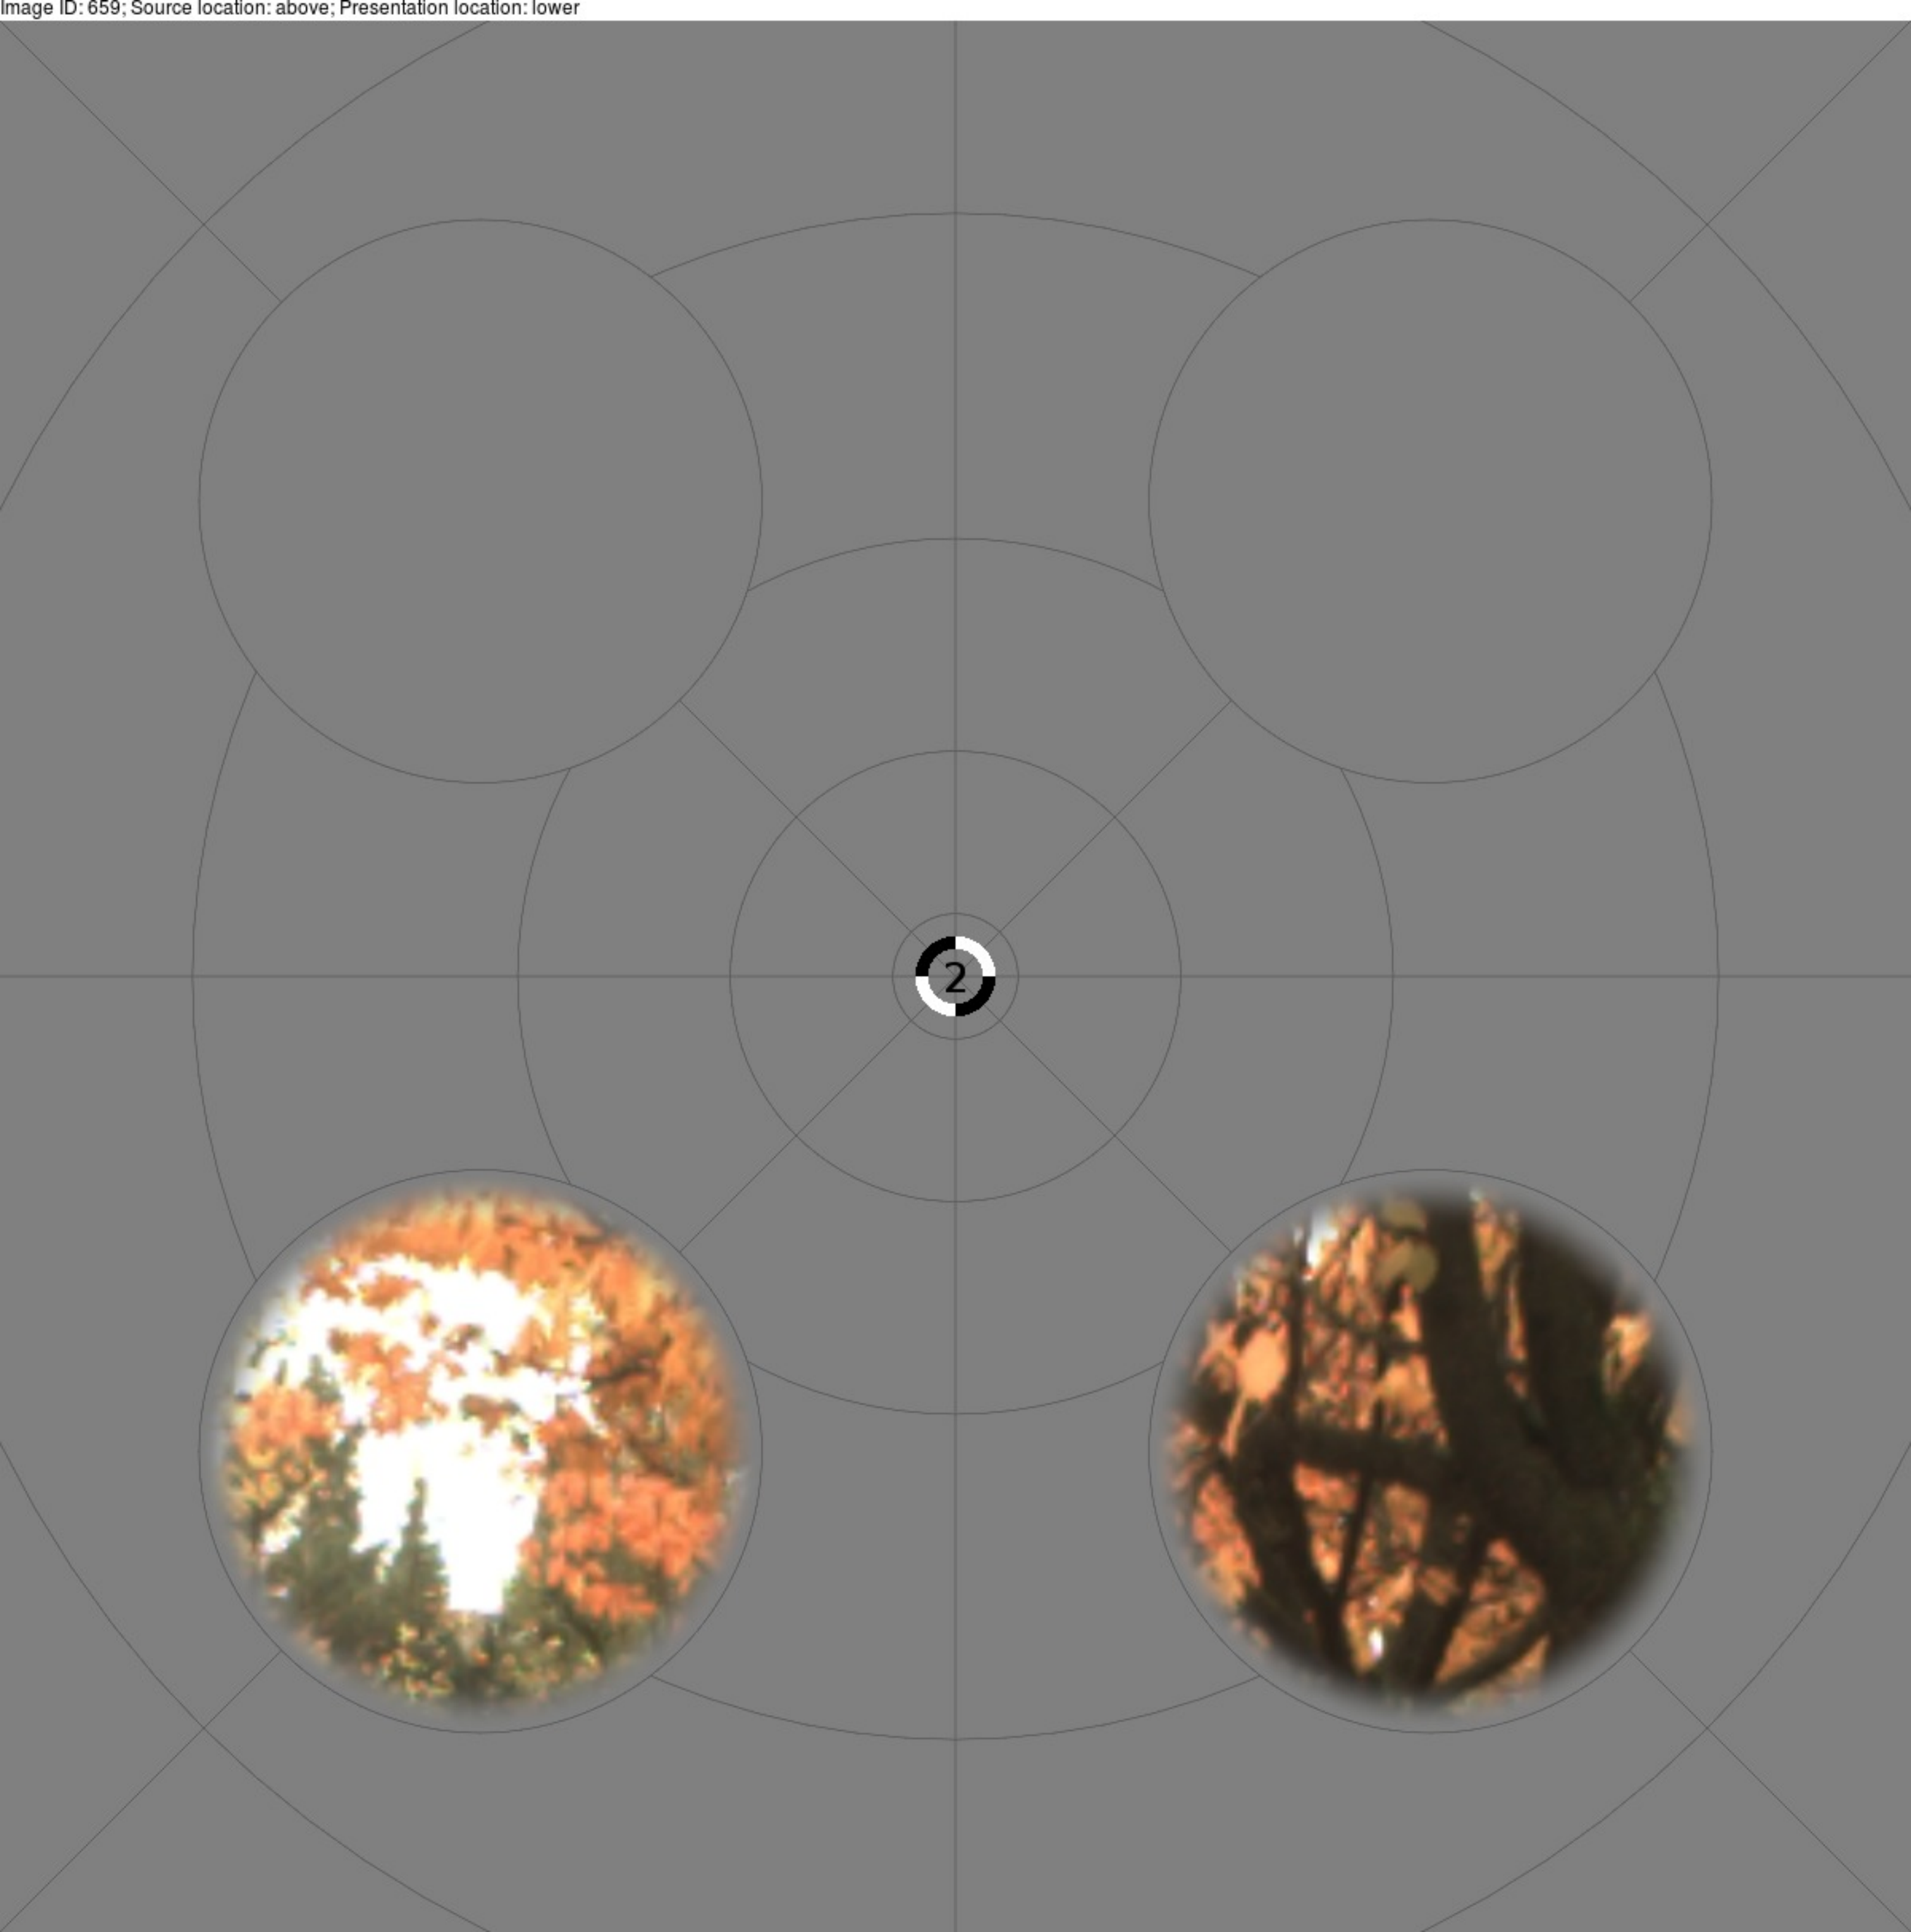



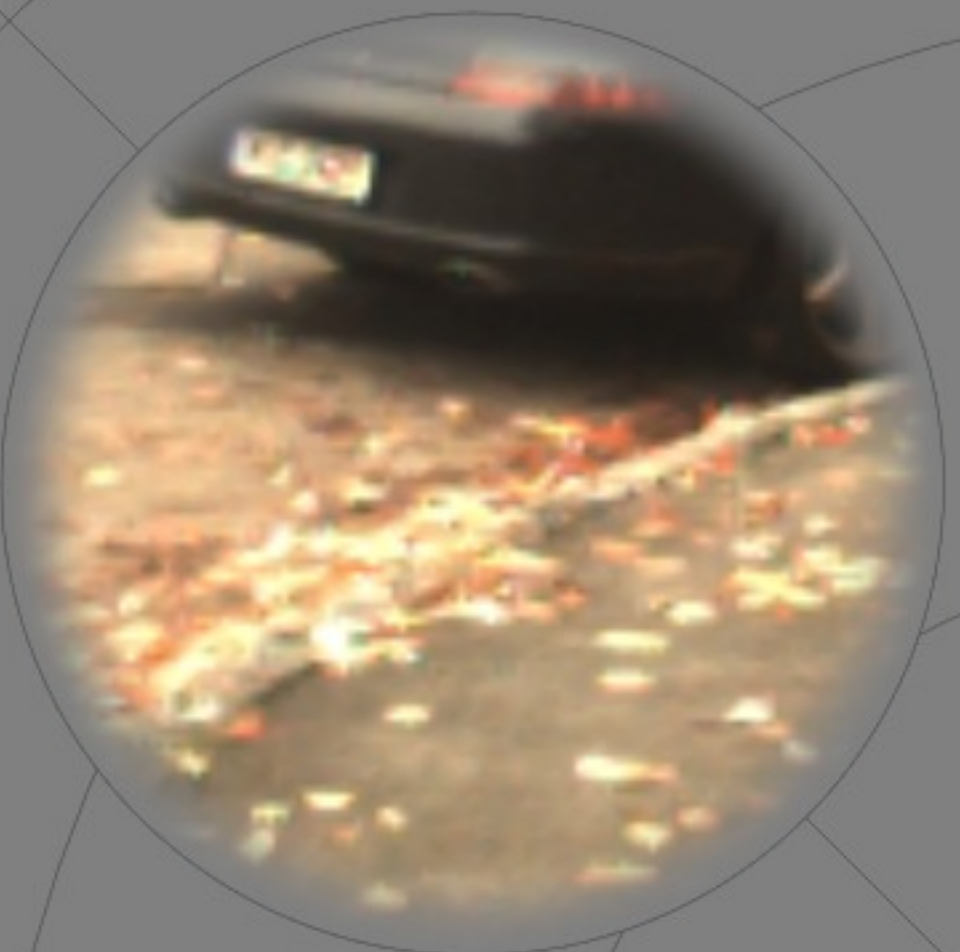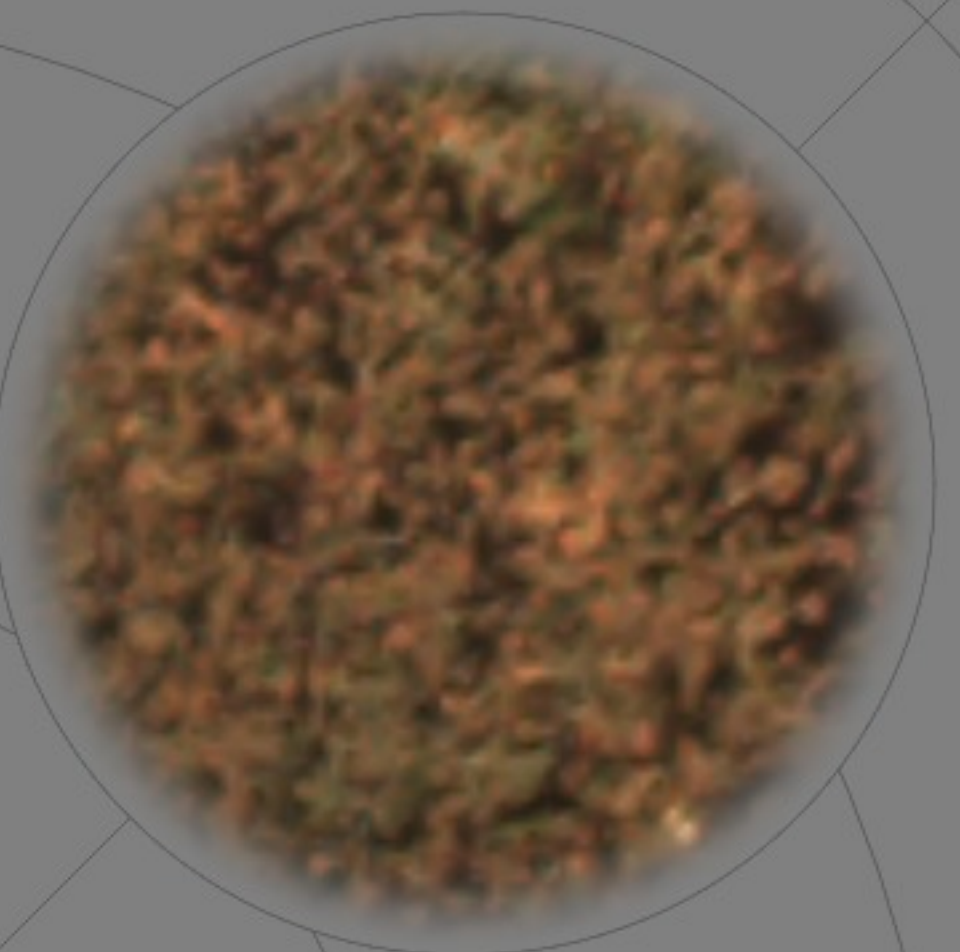

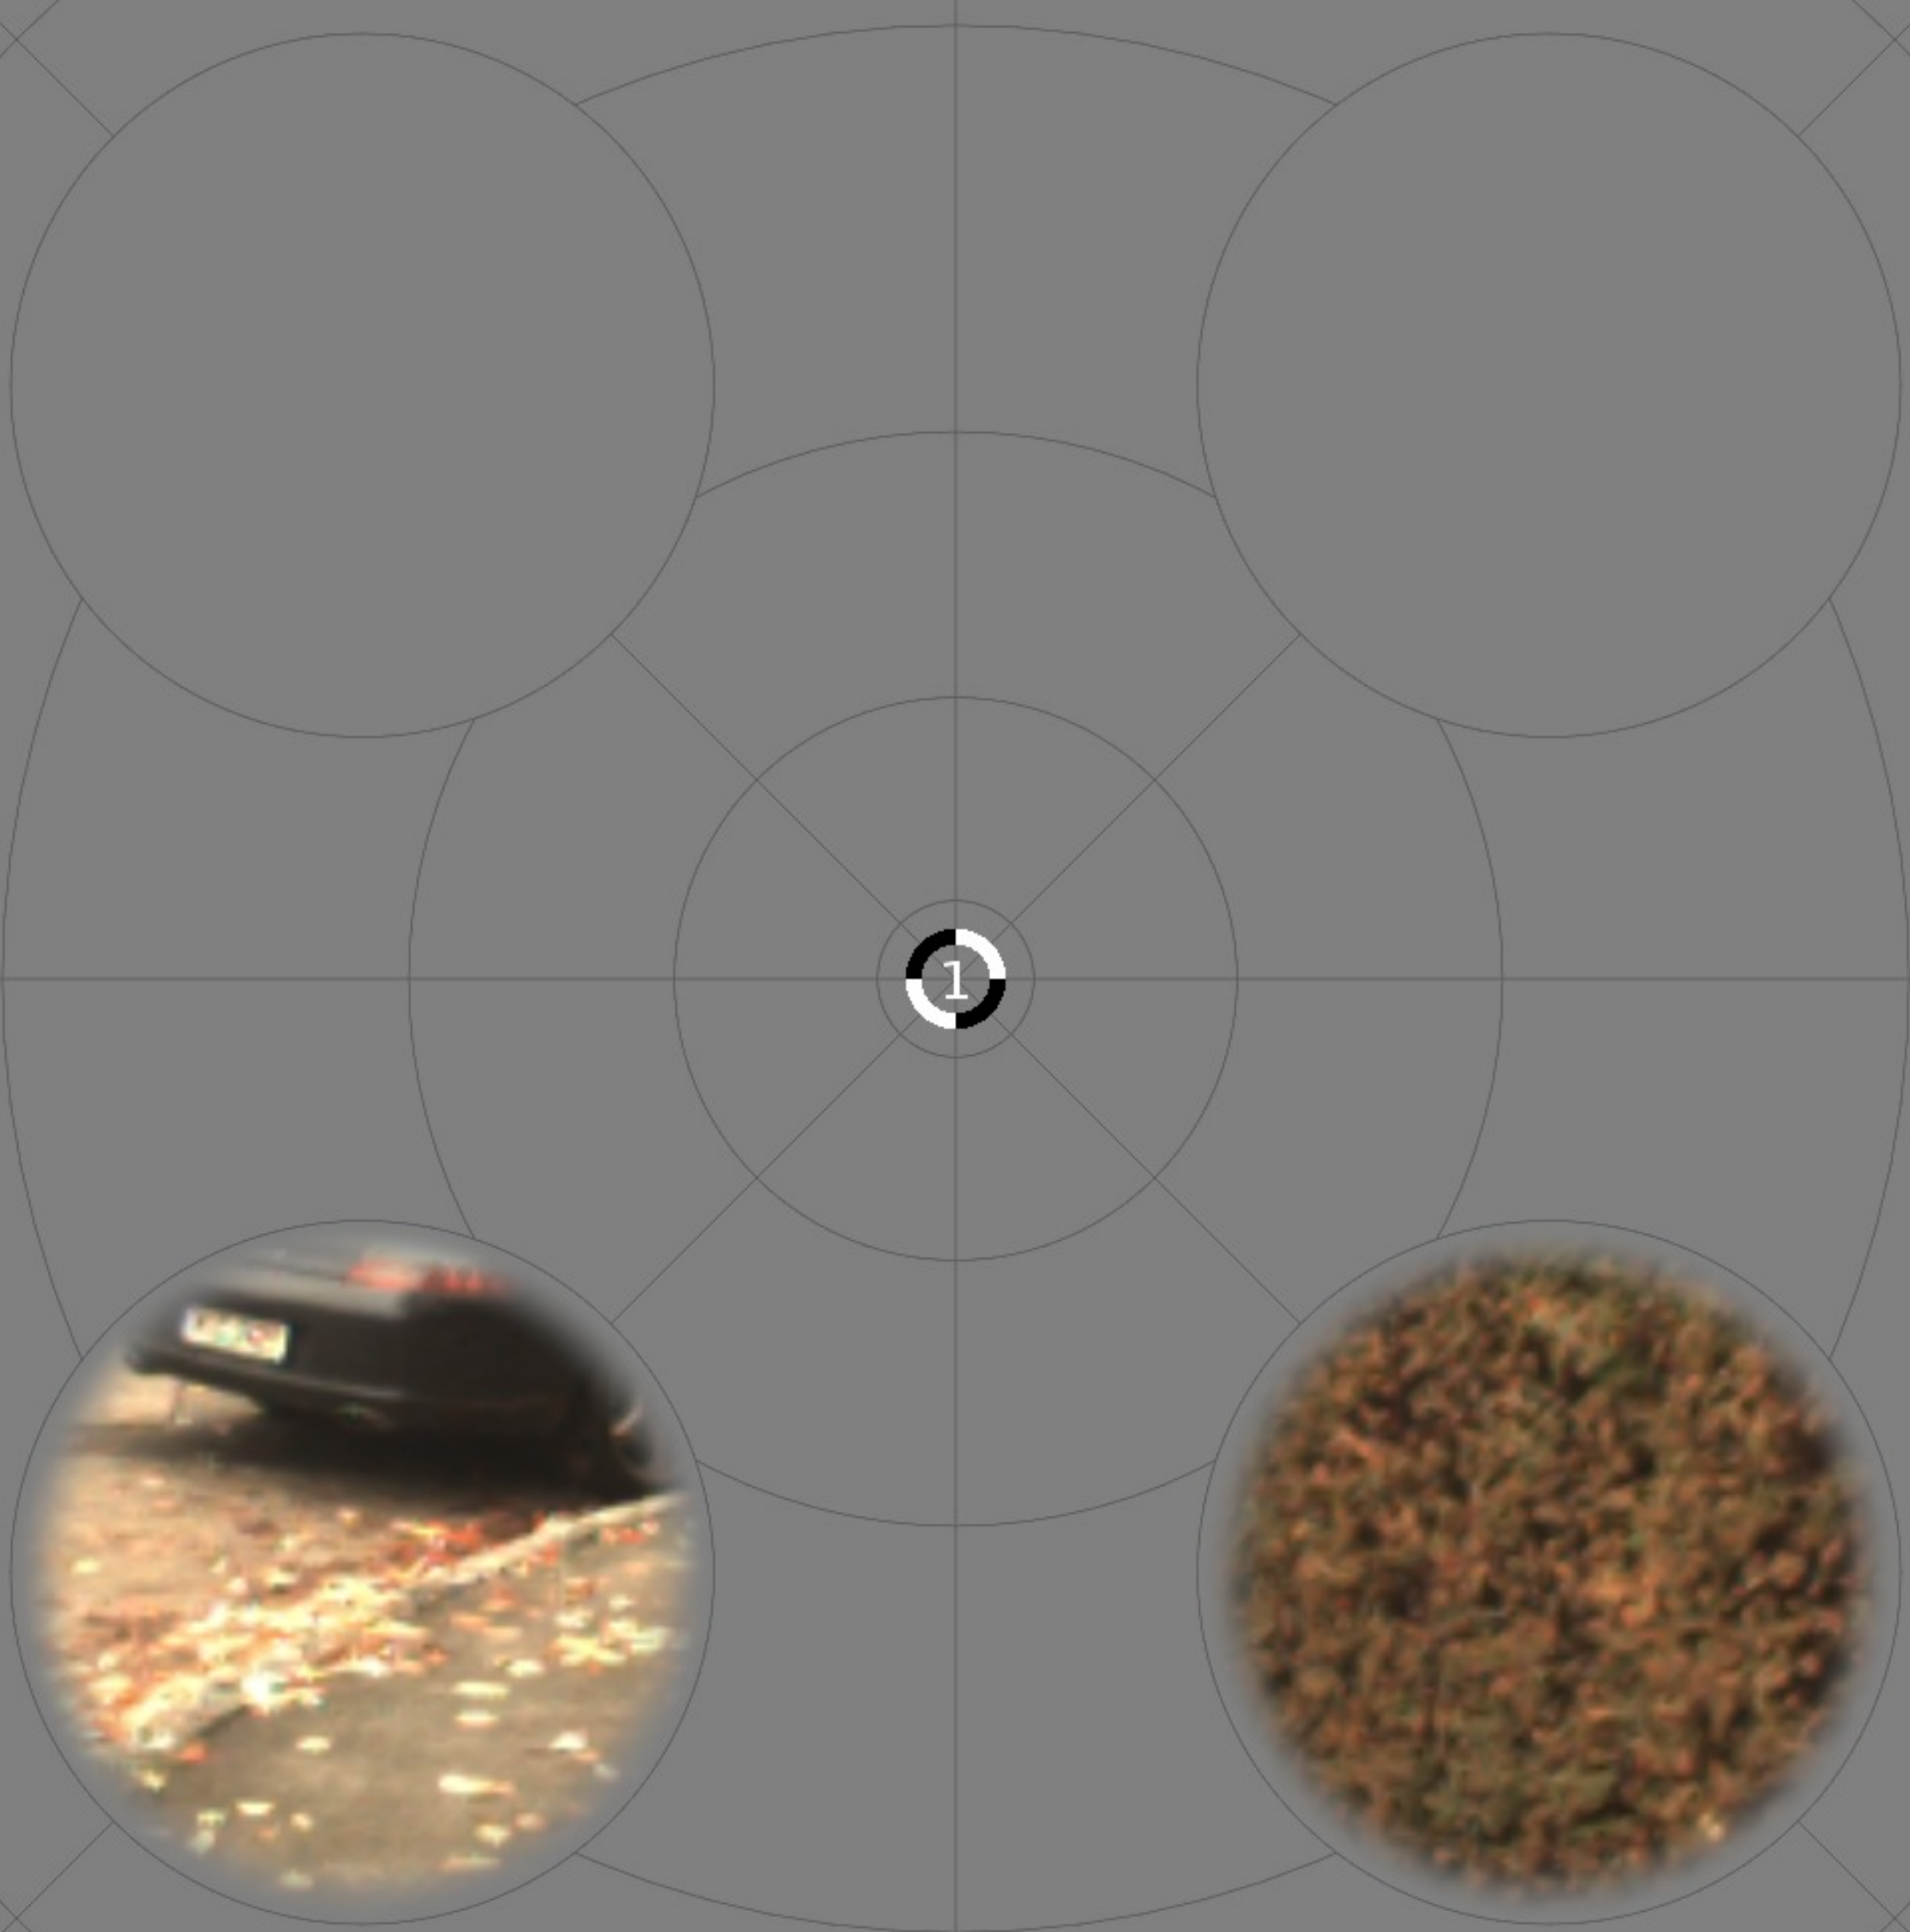



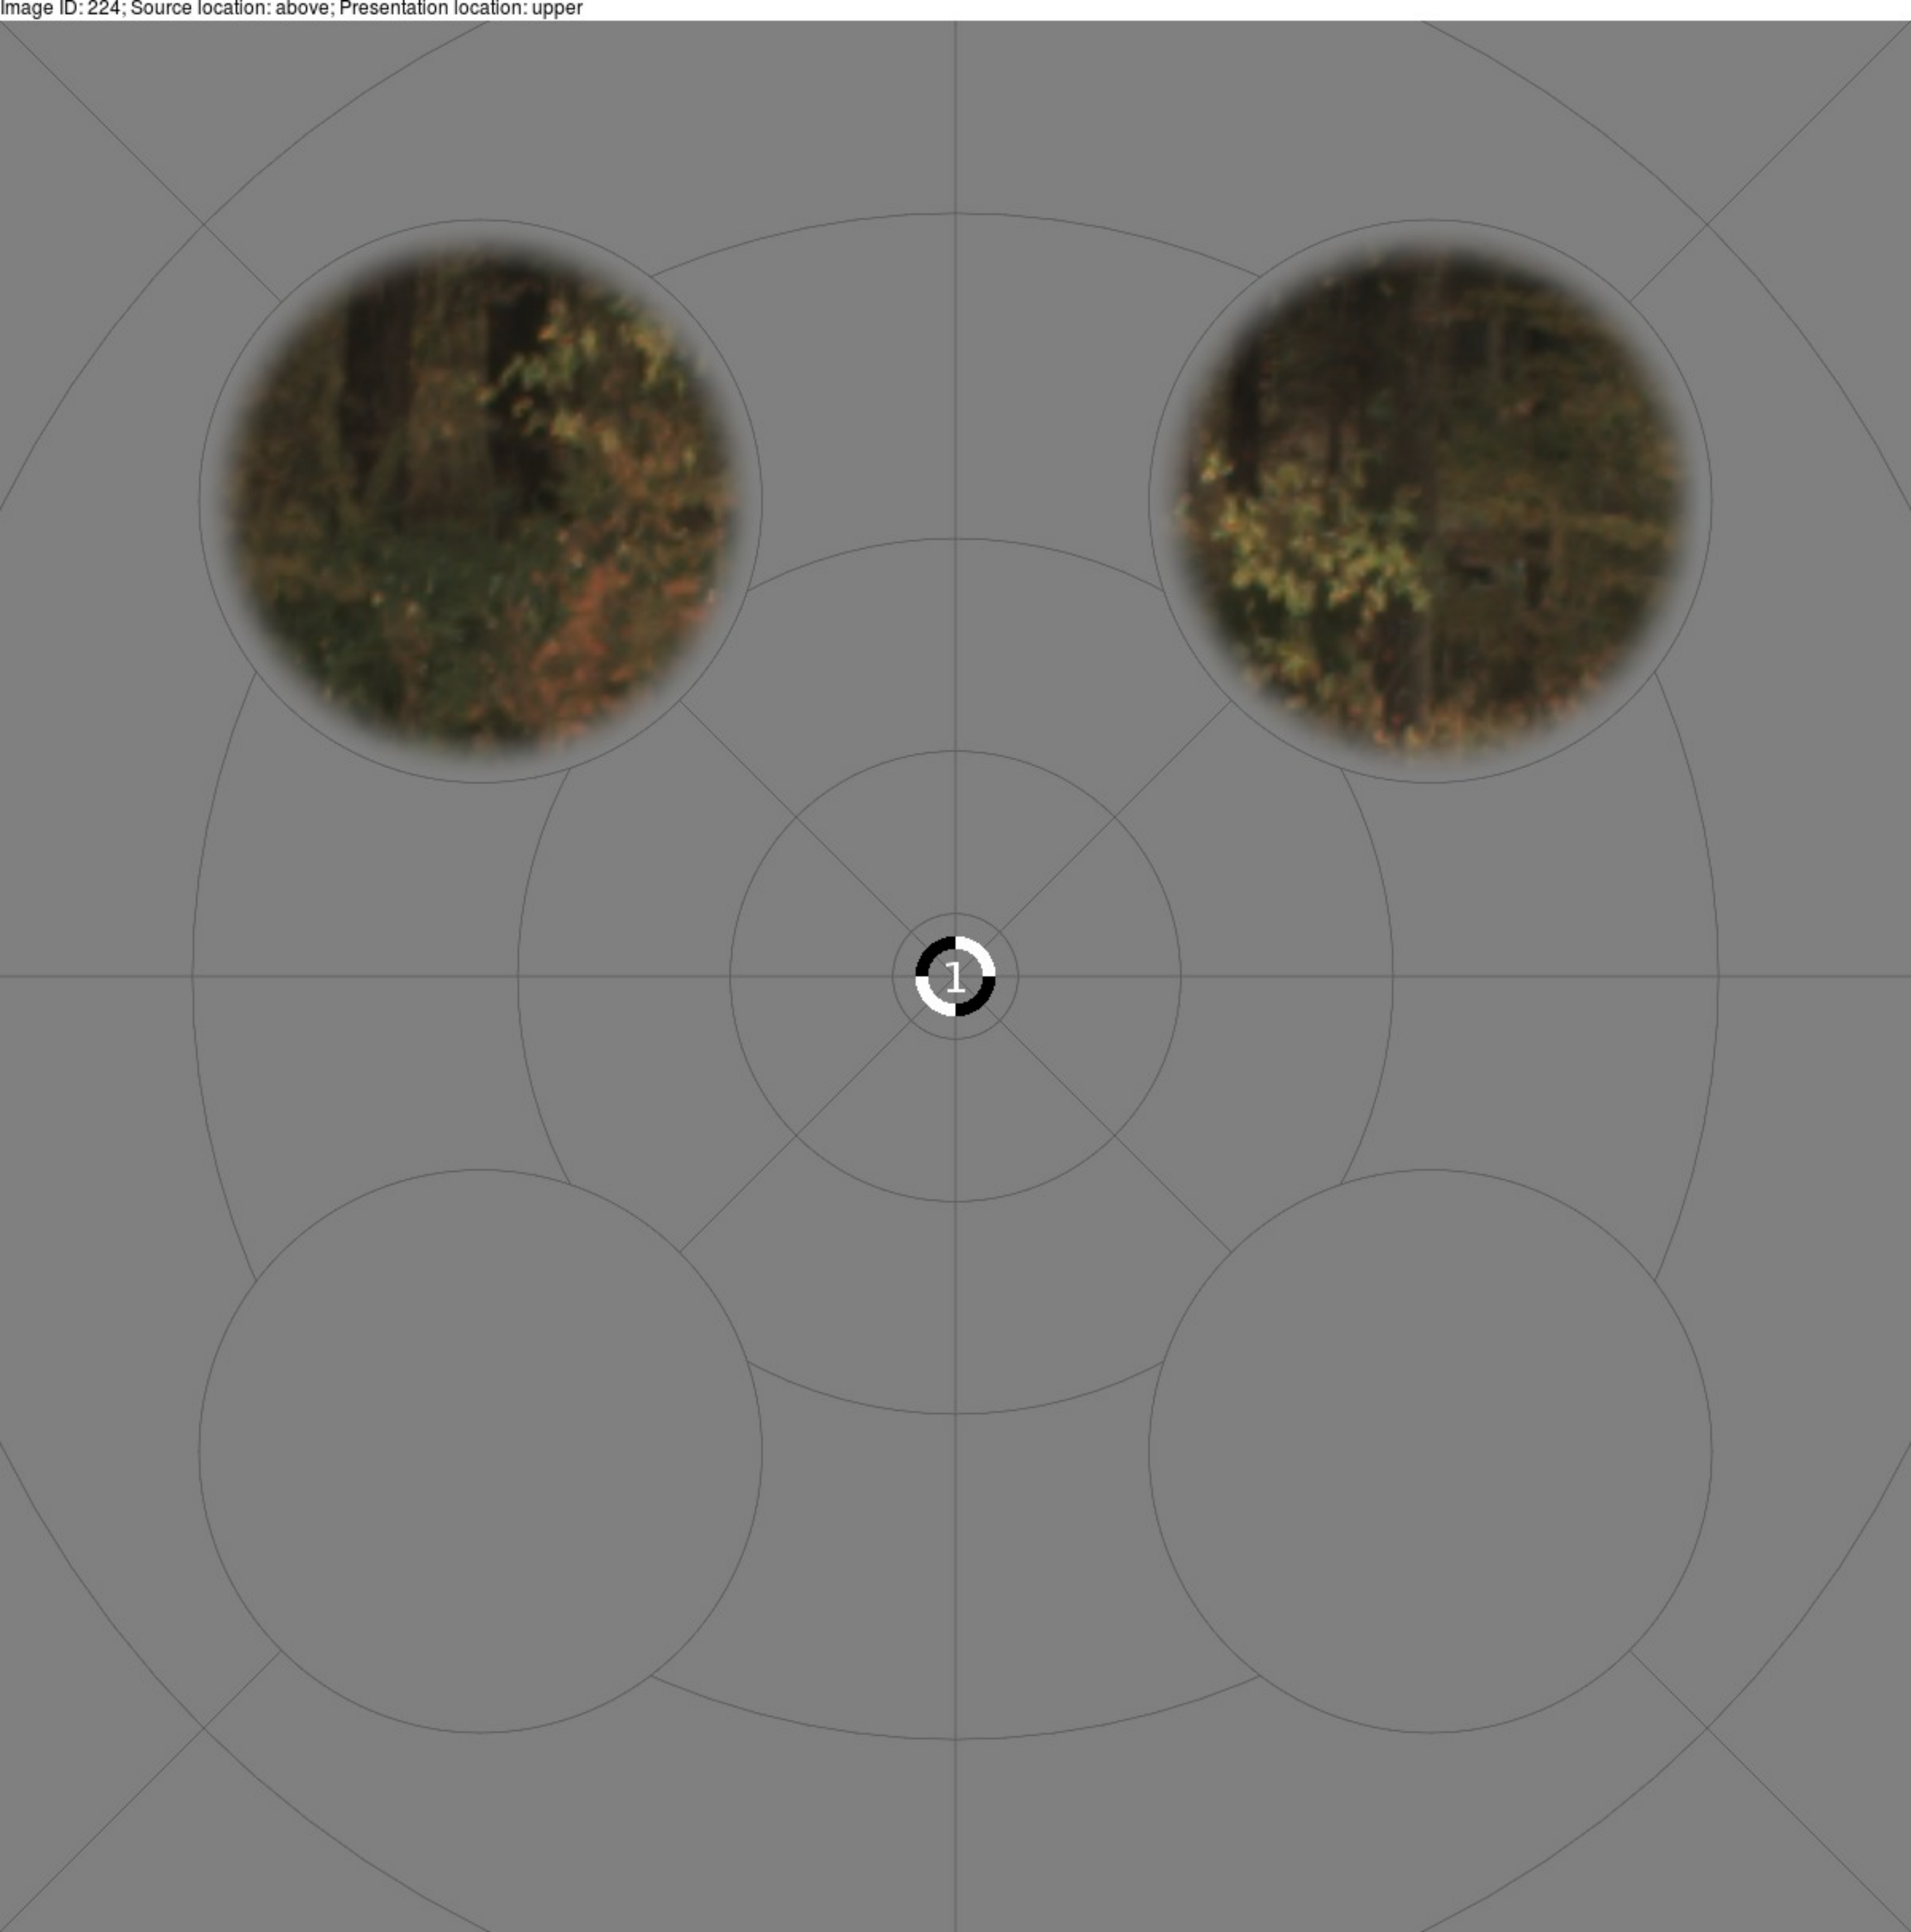



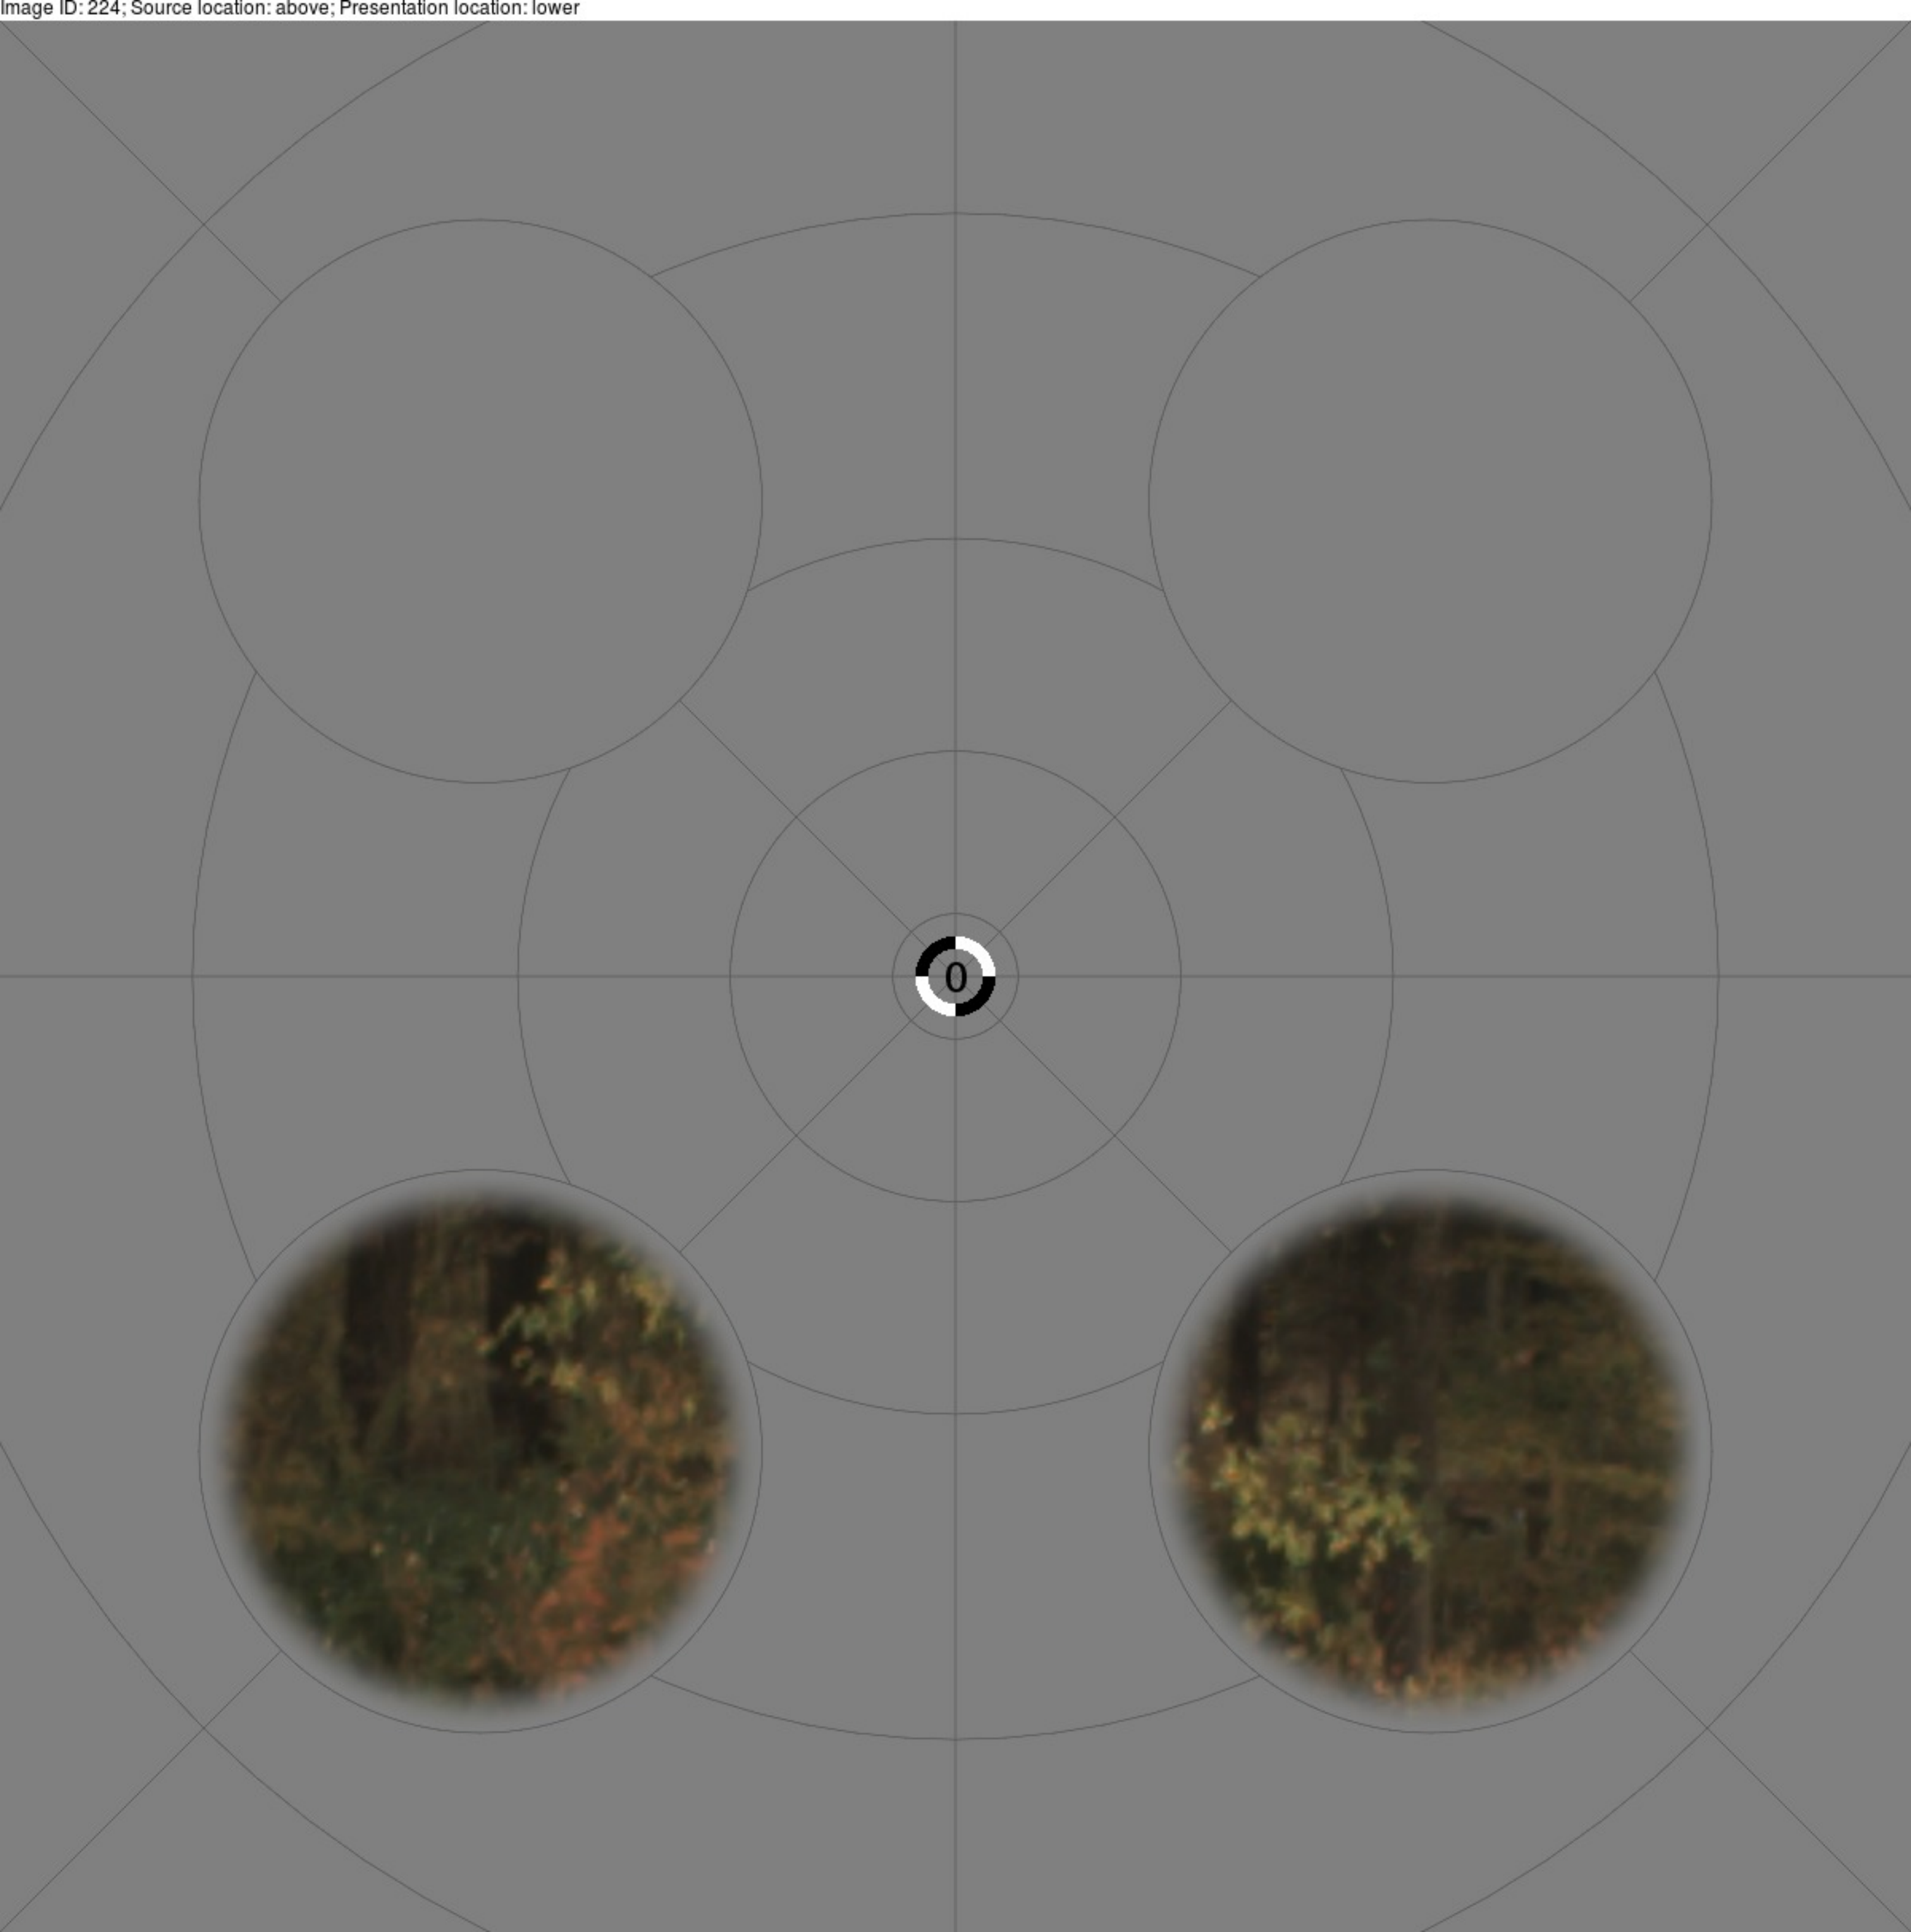

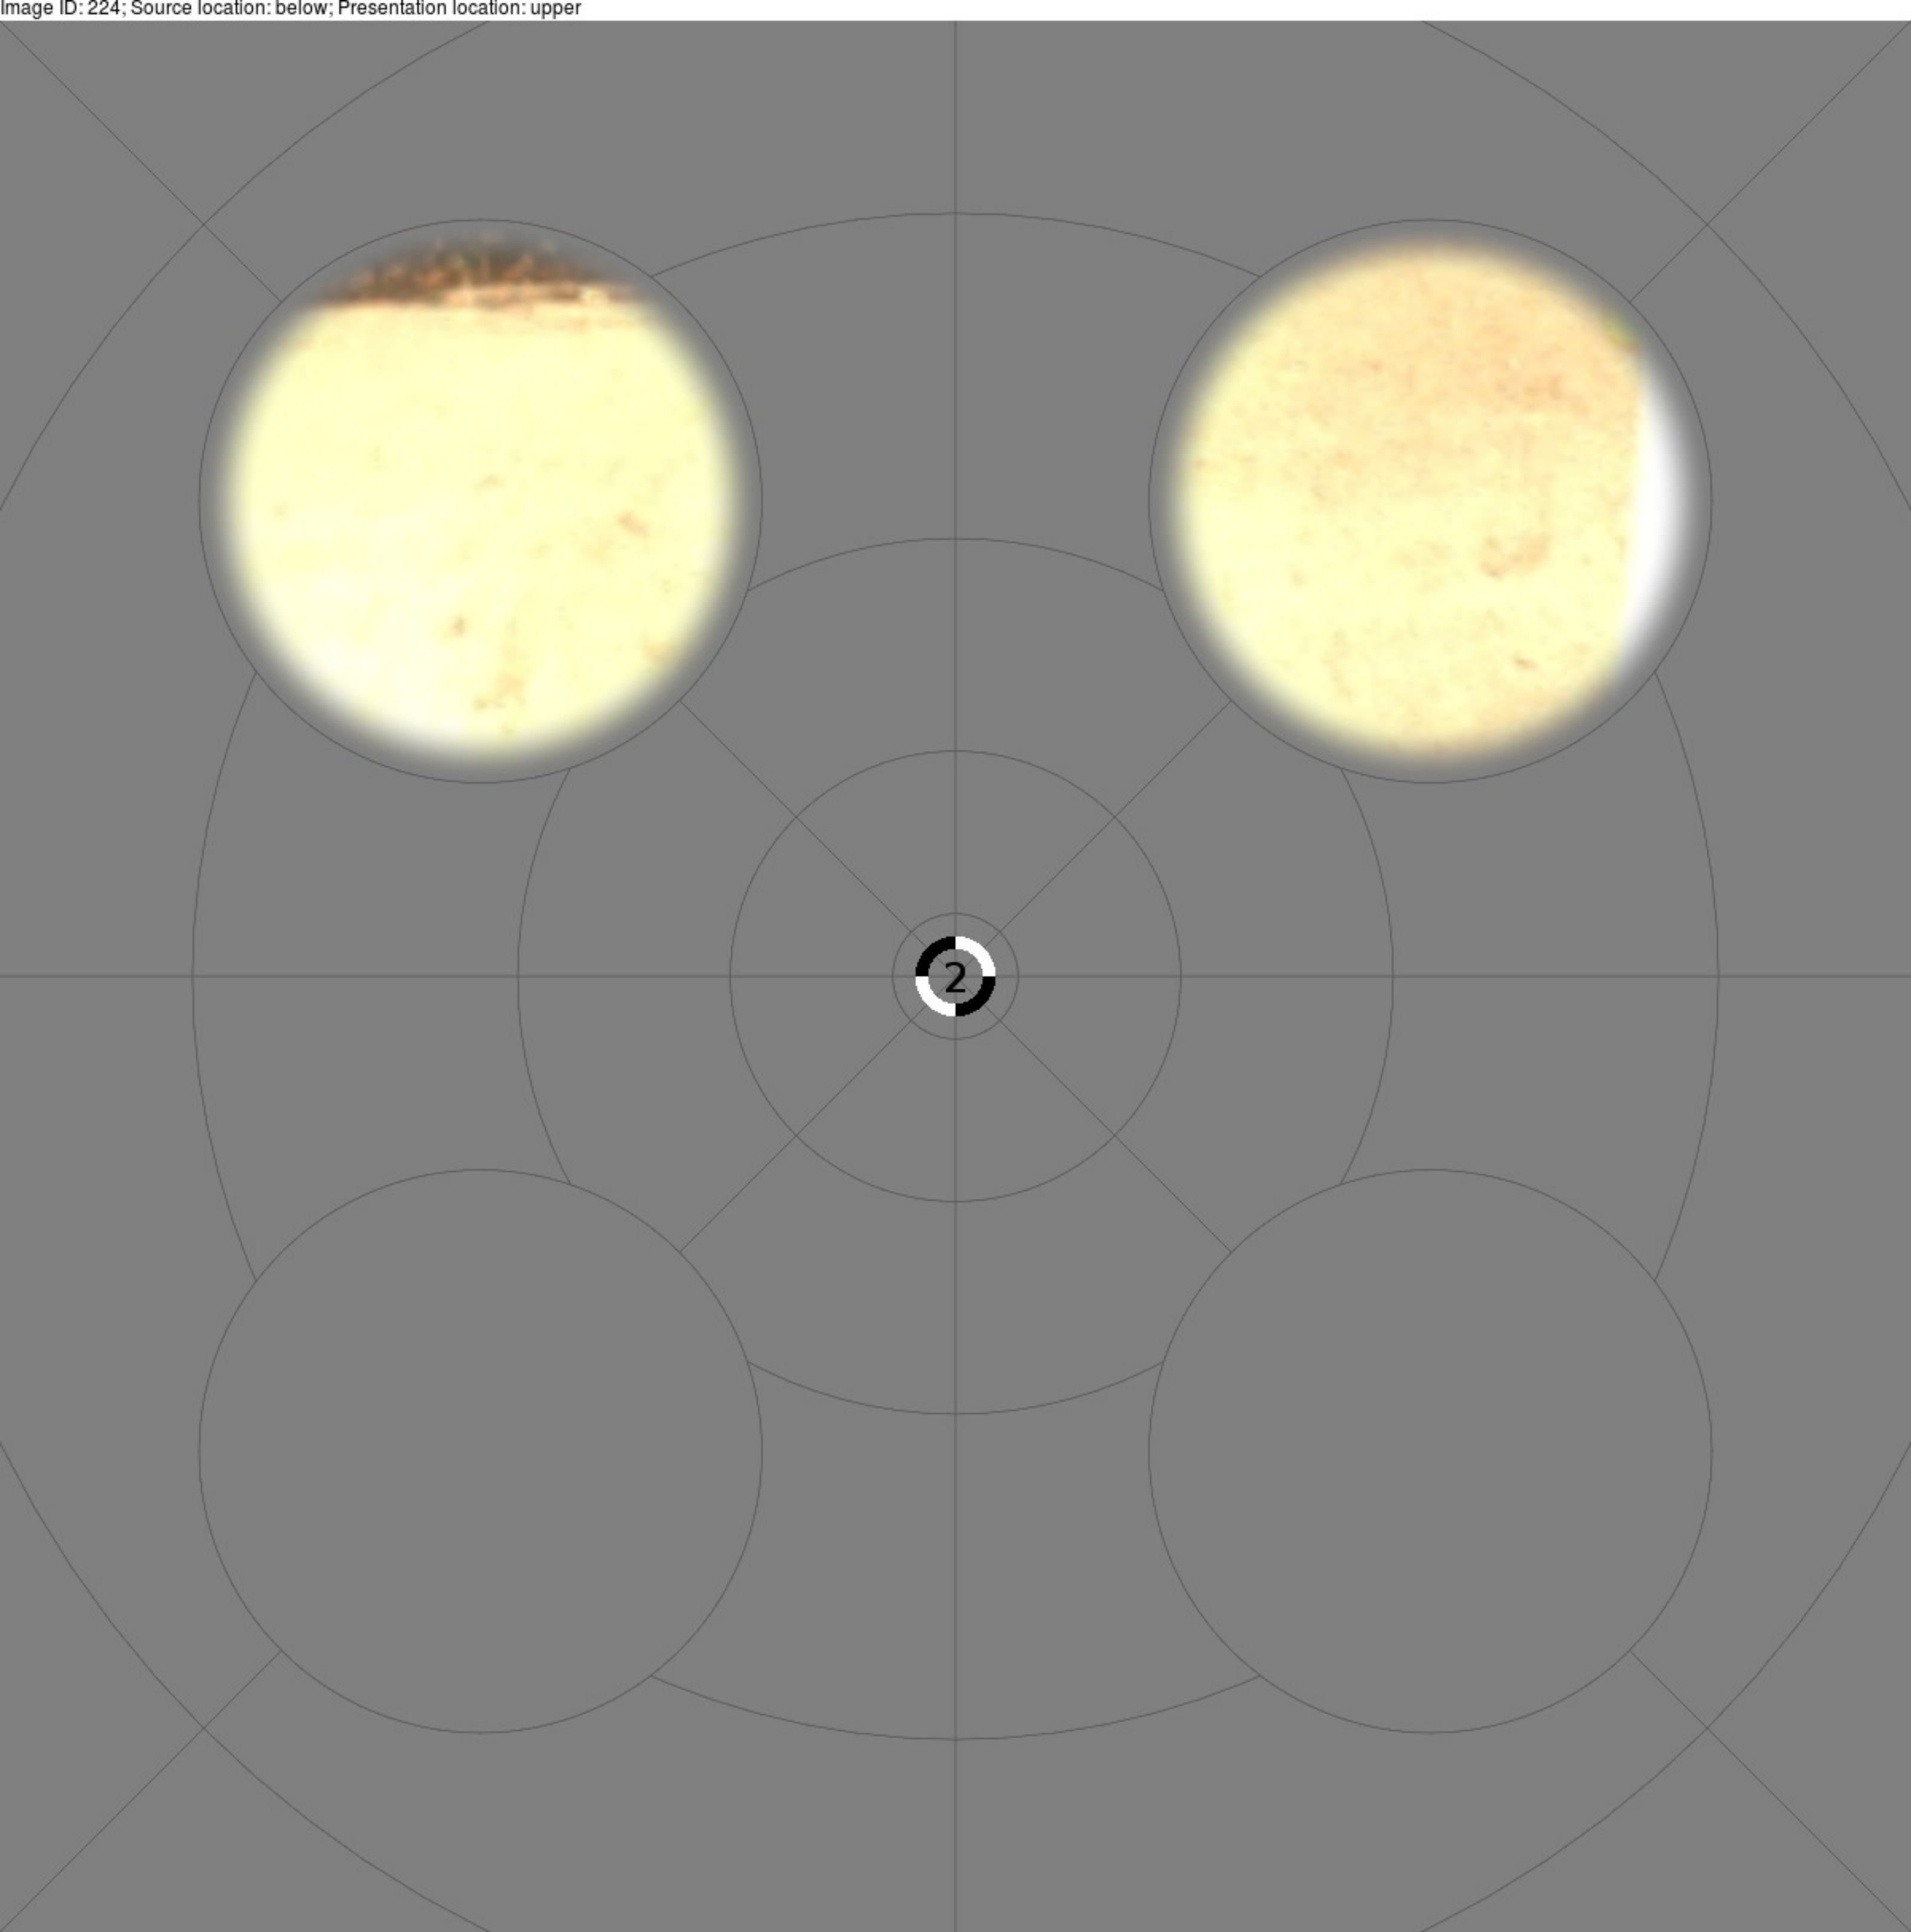

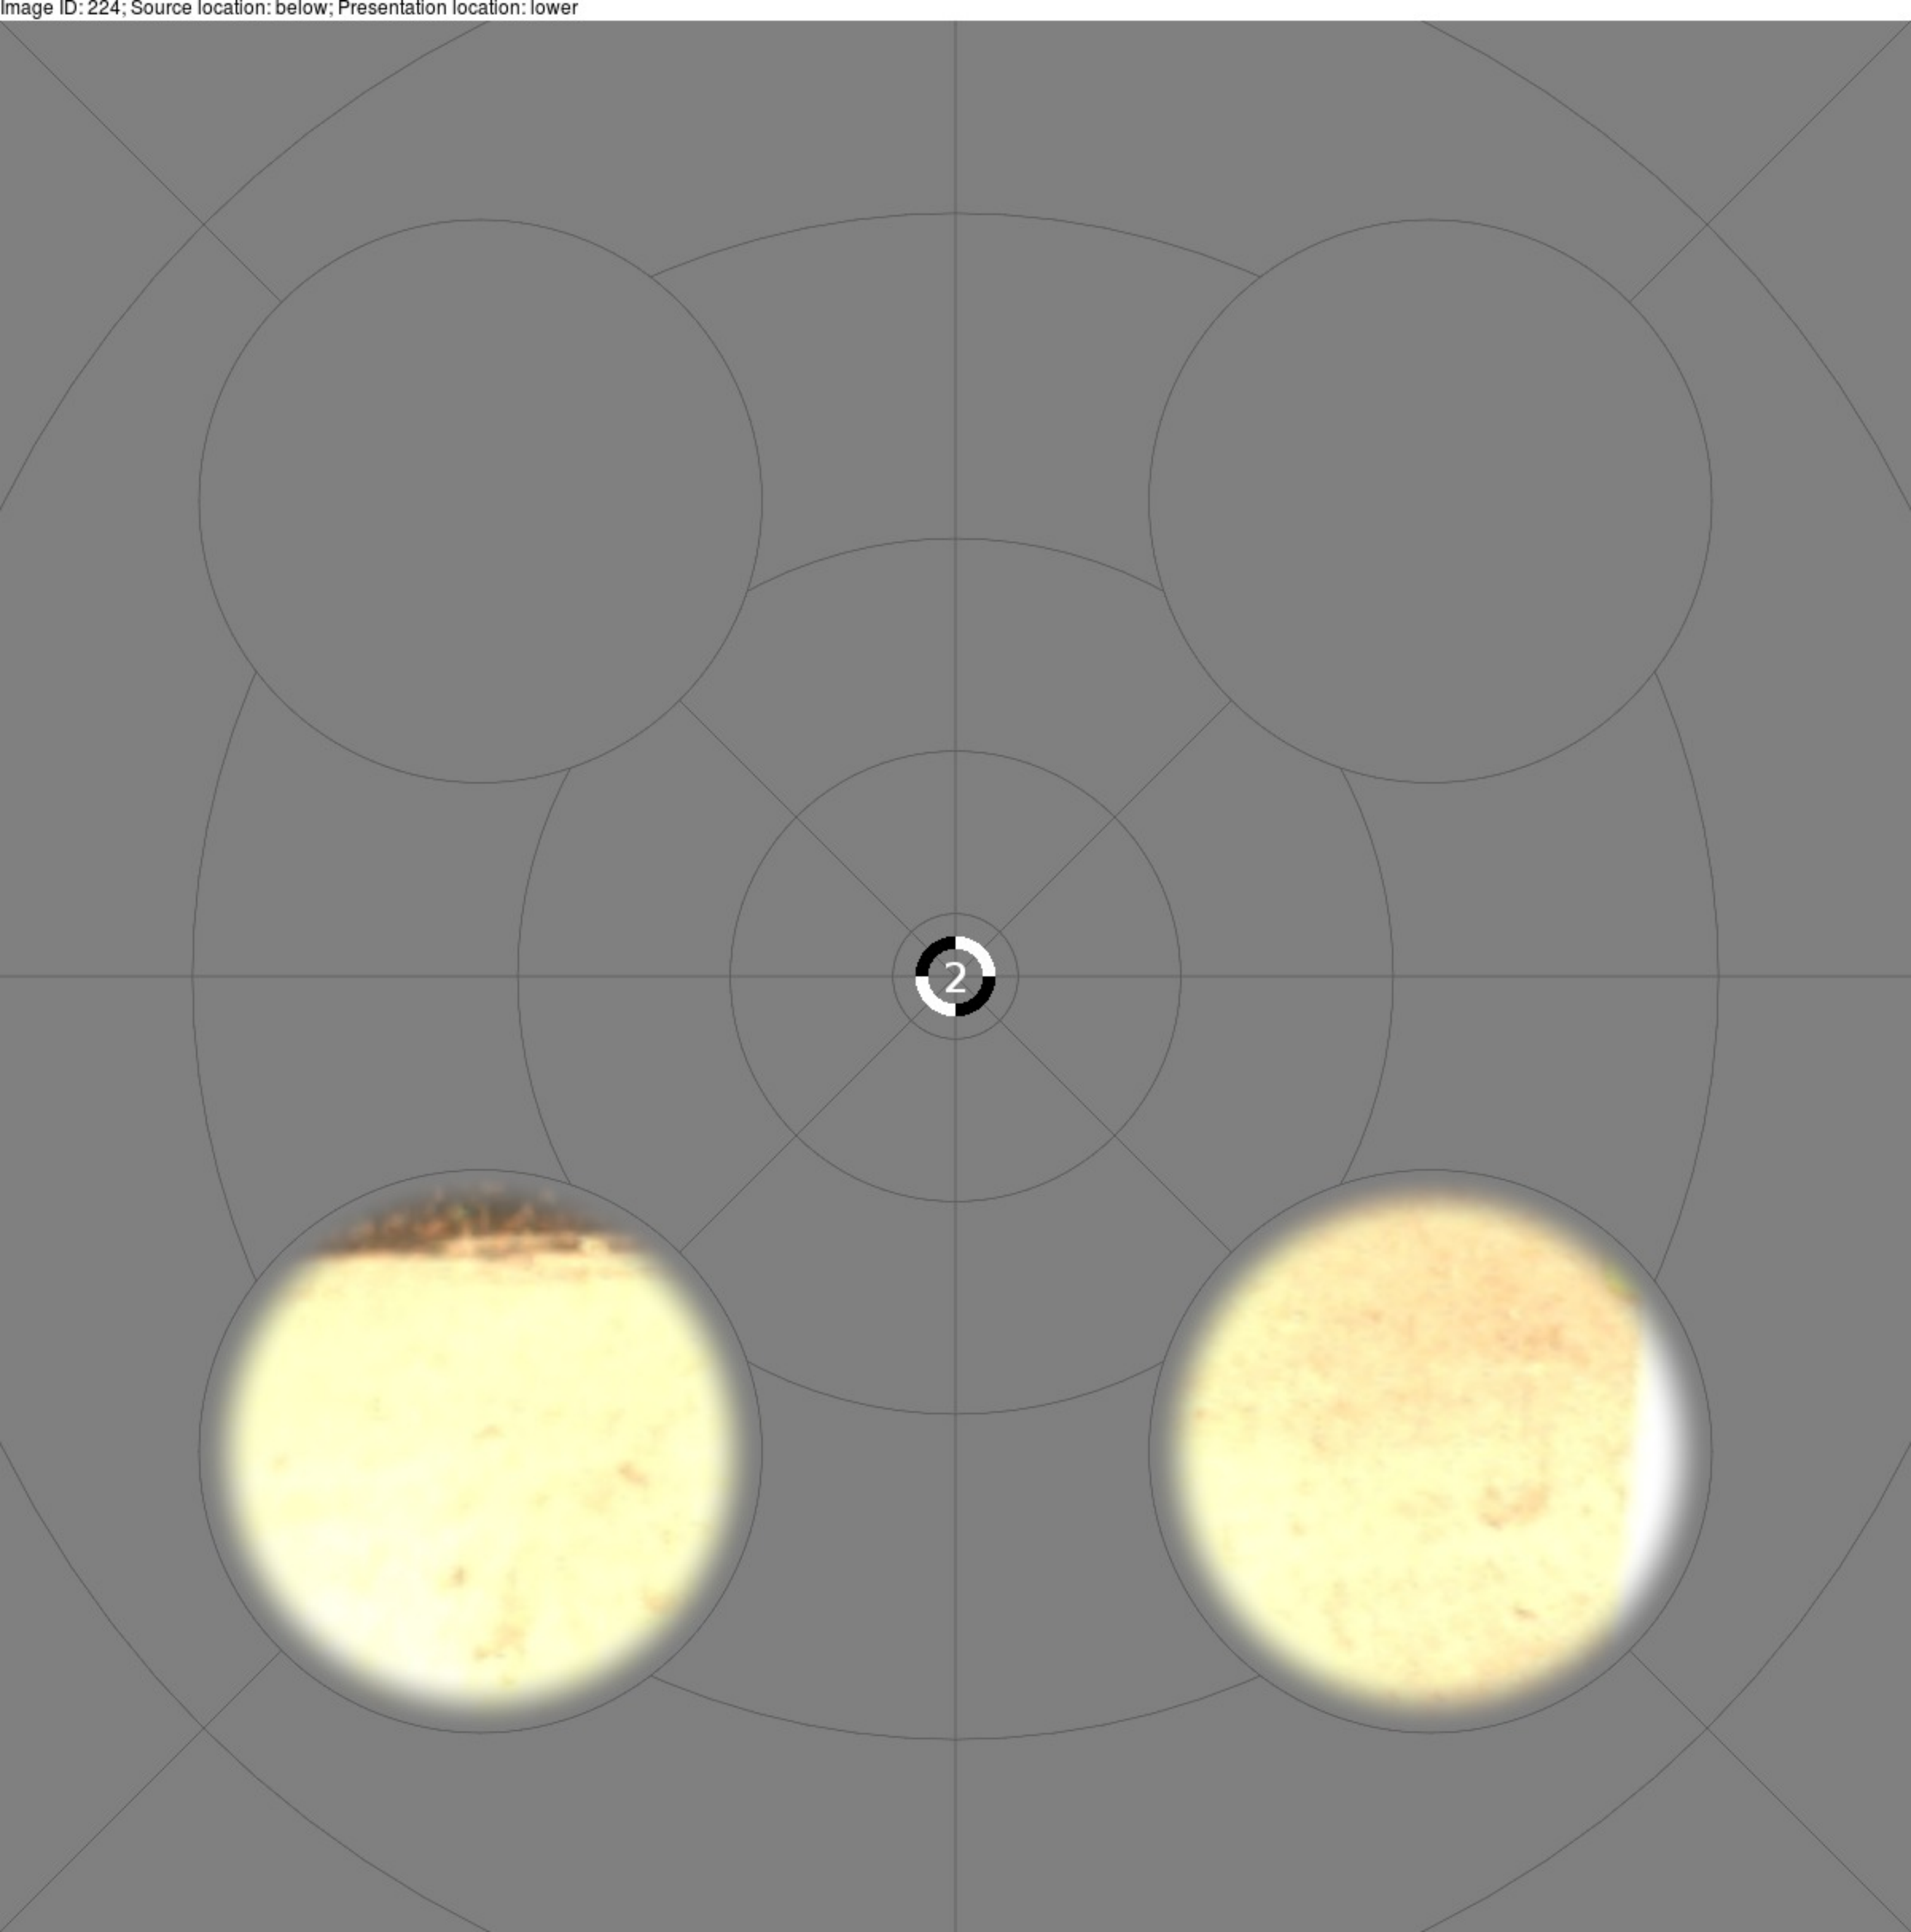



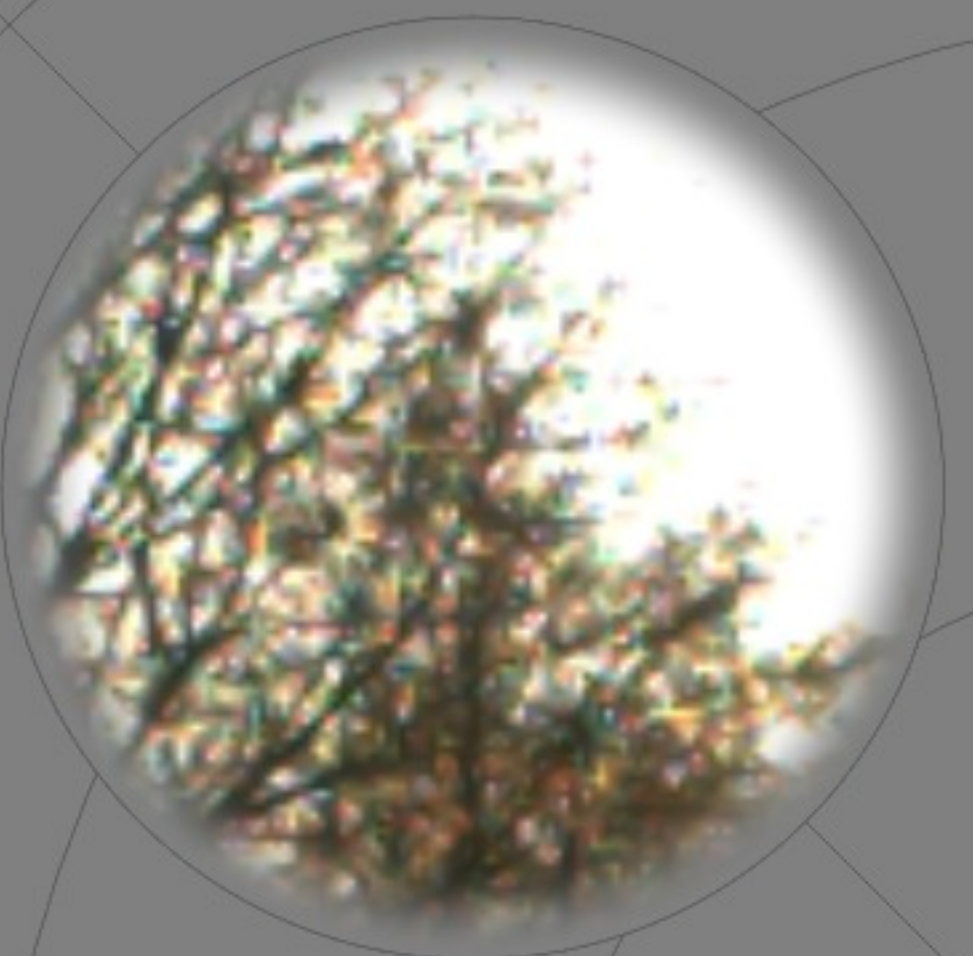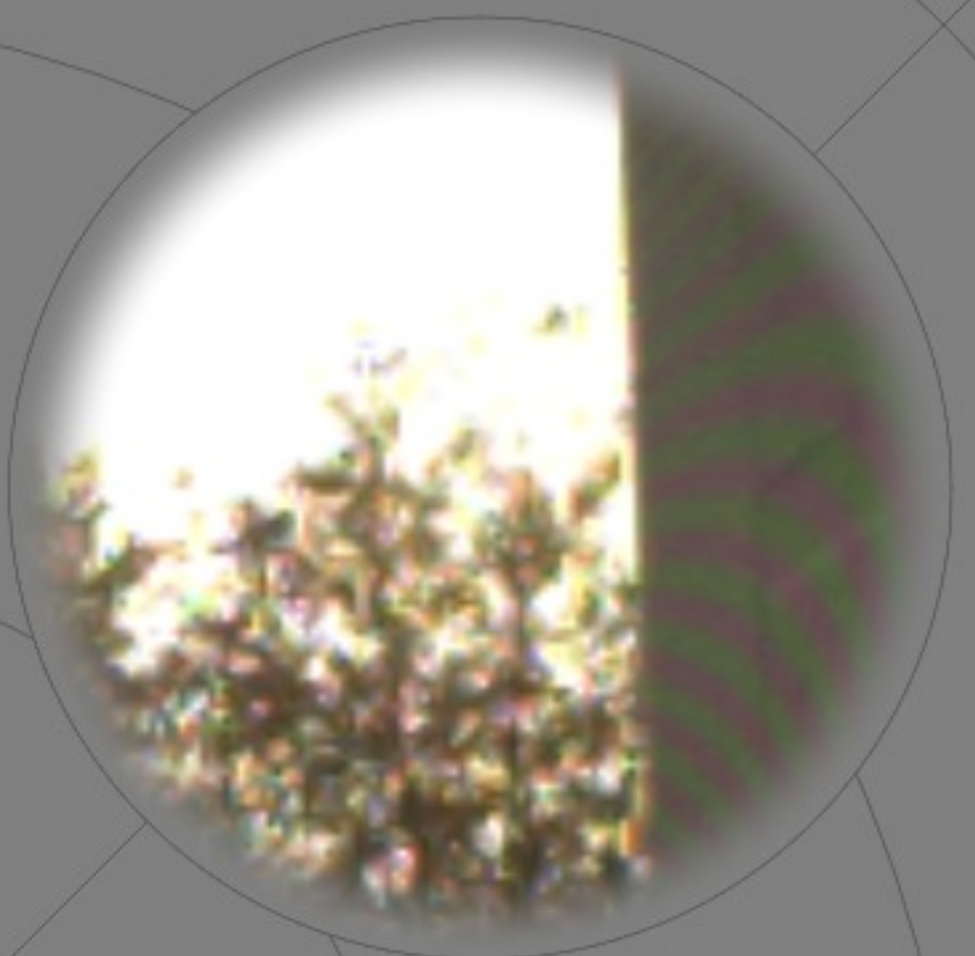

6

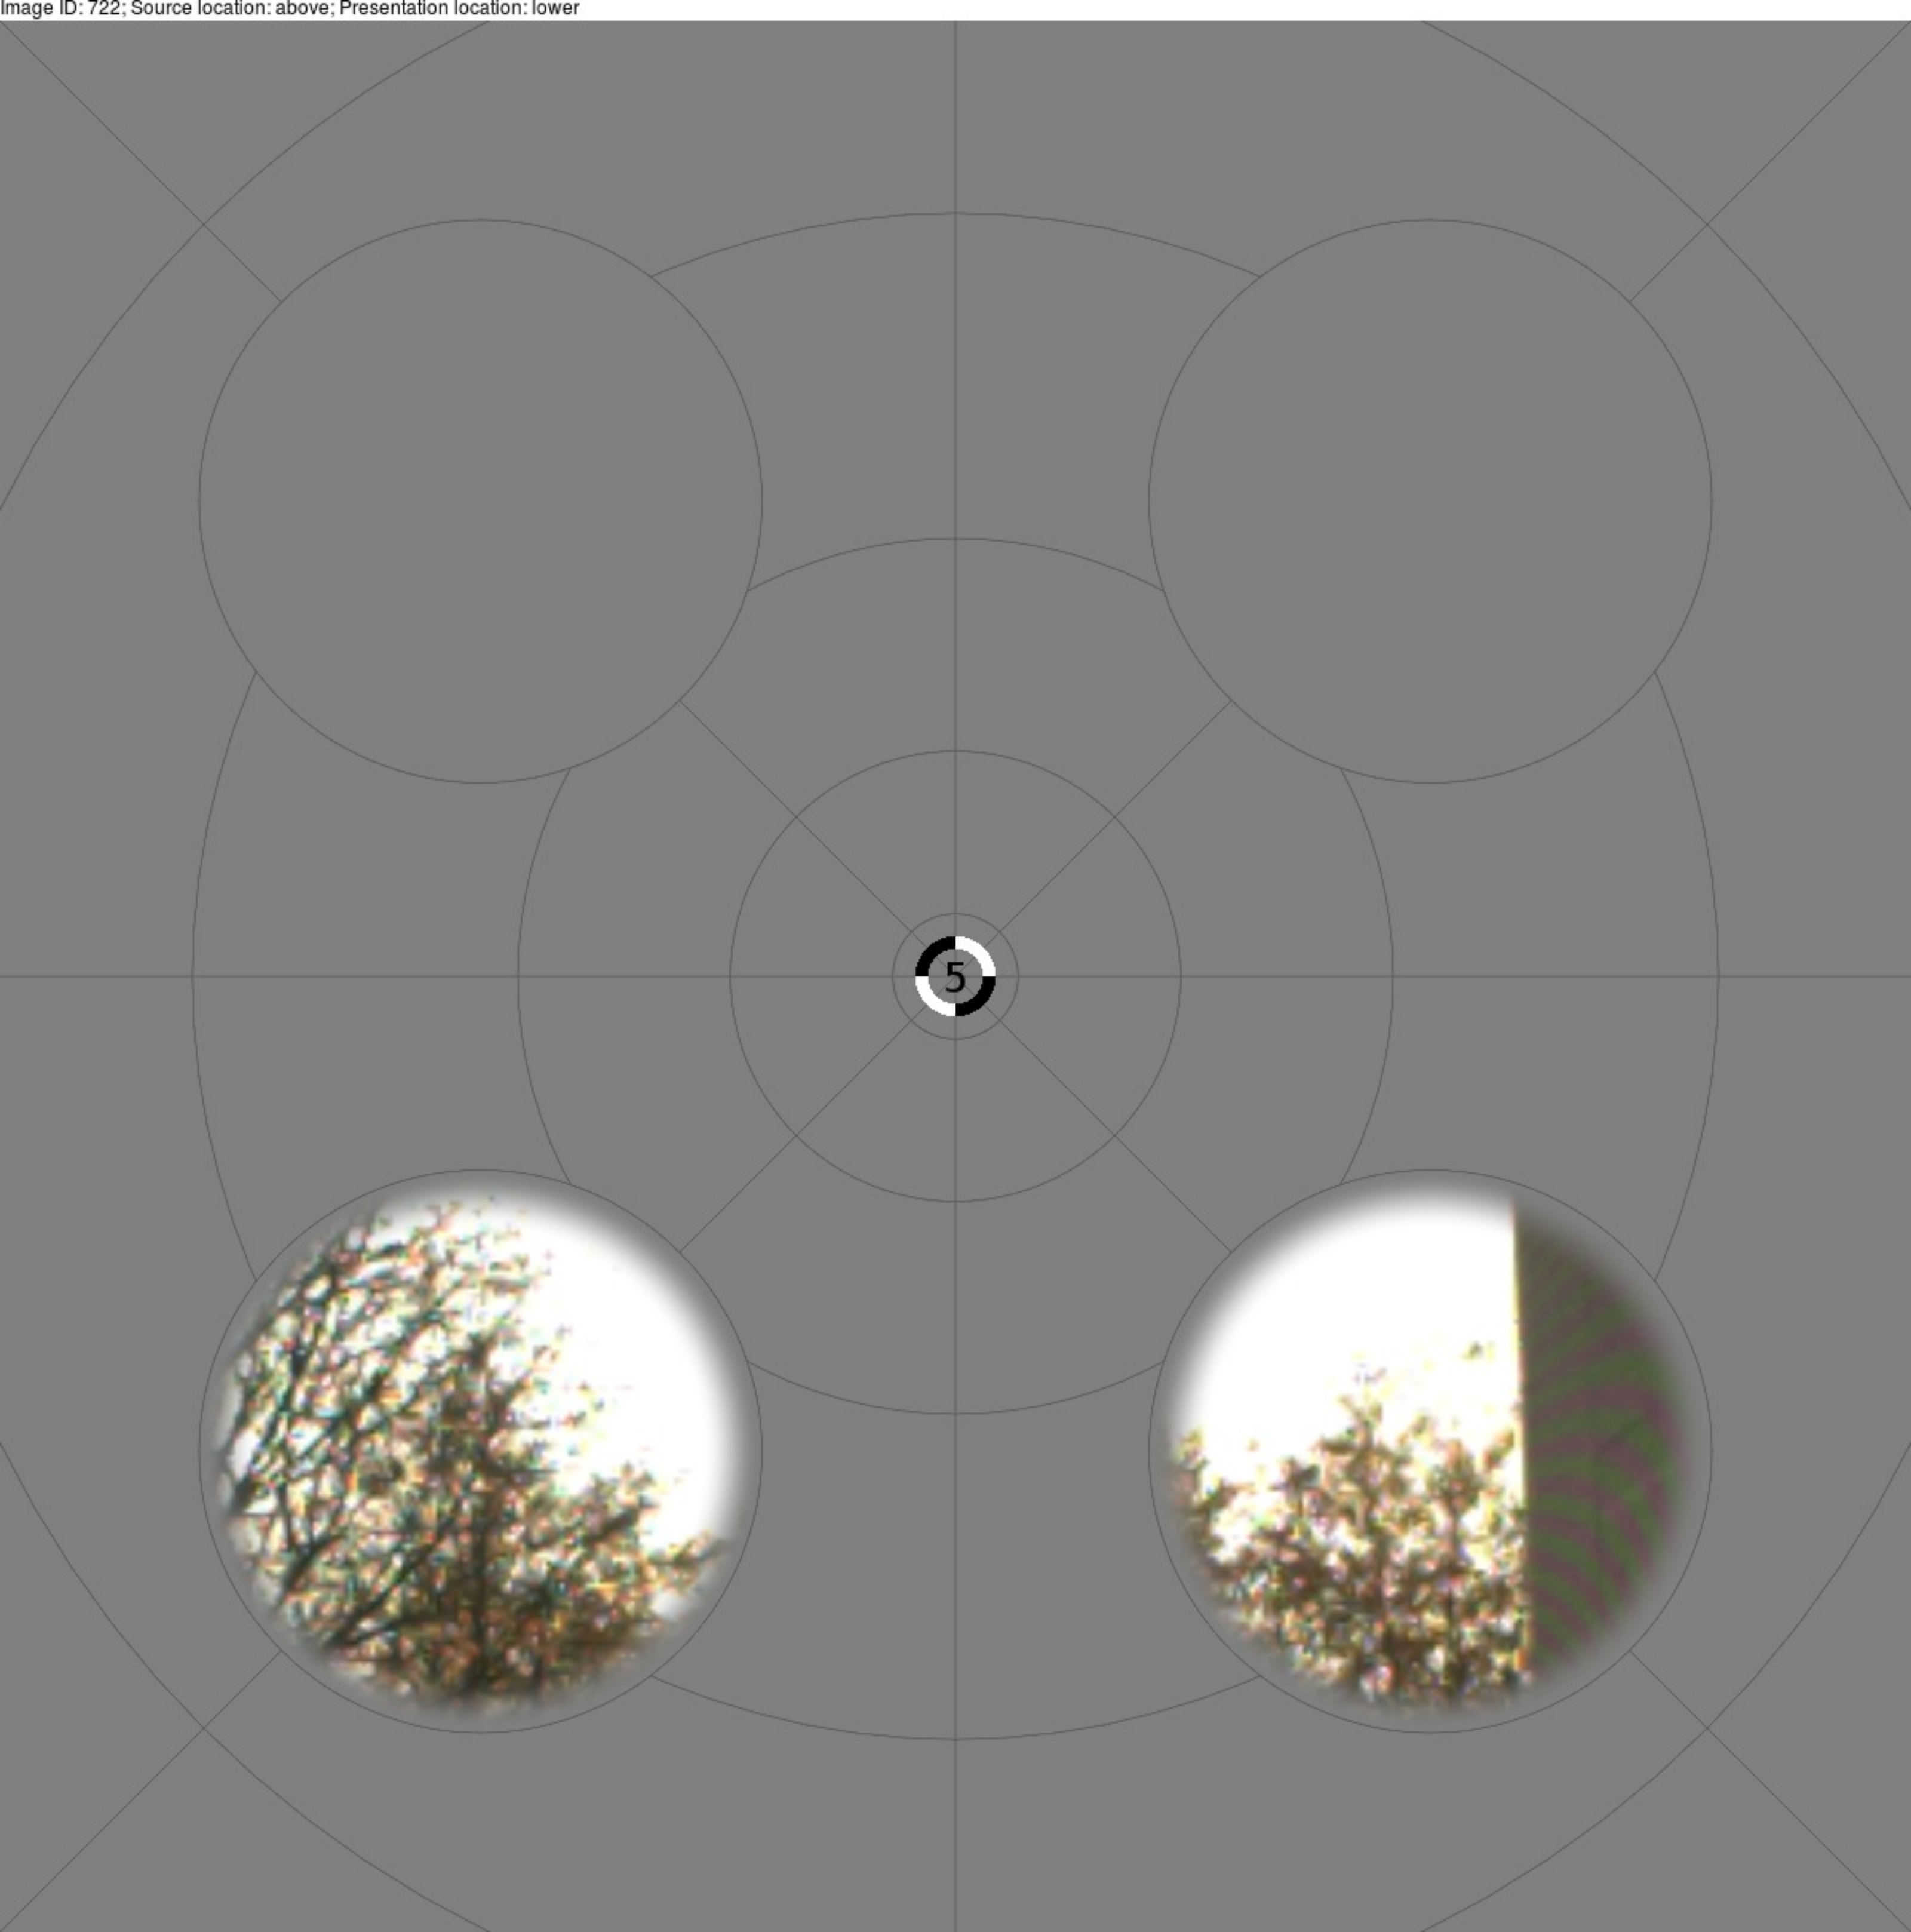



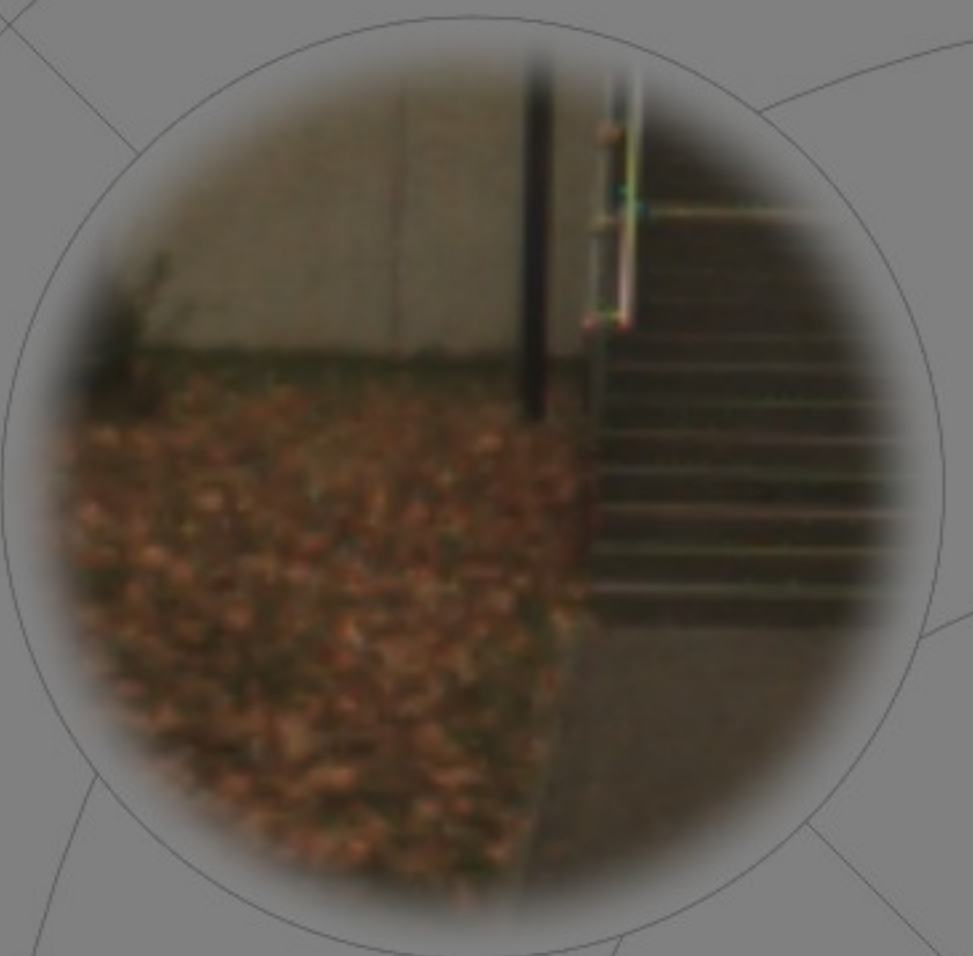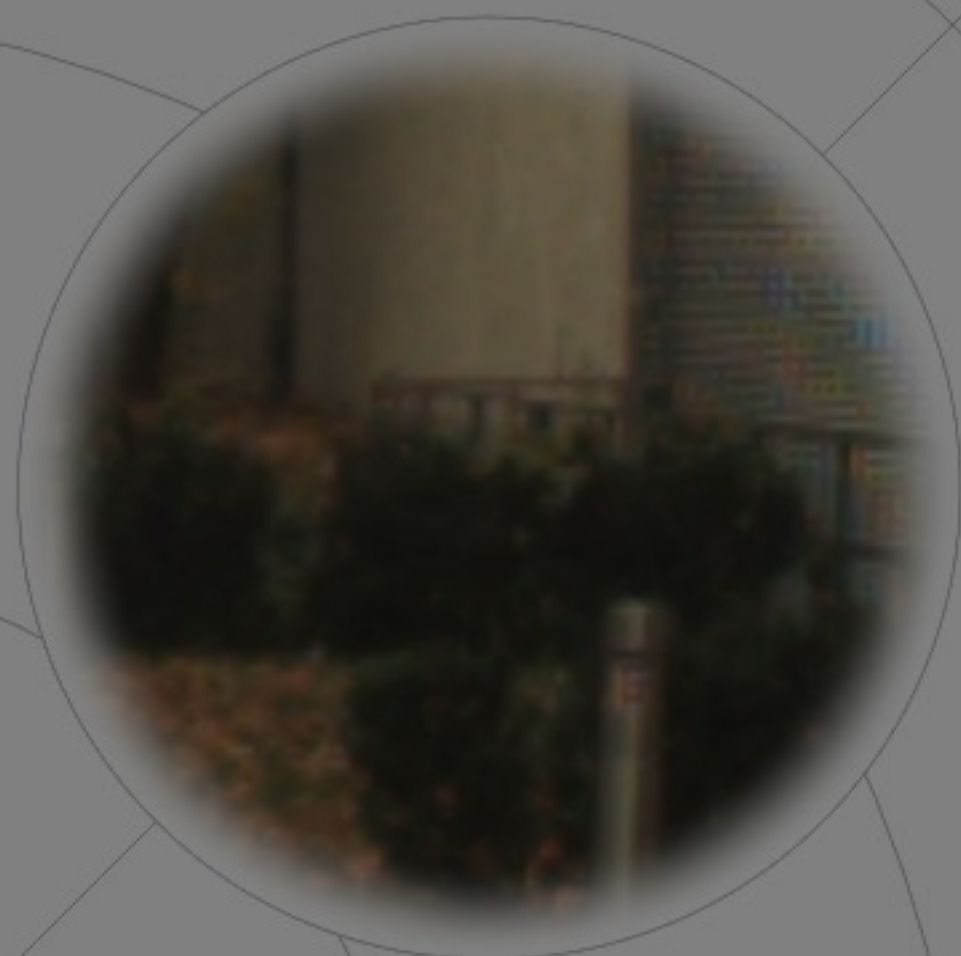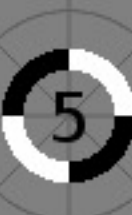



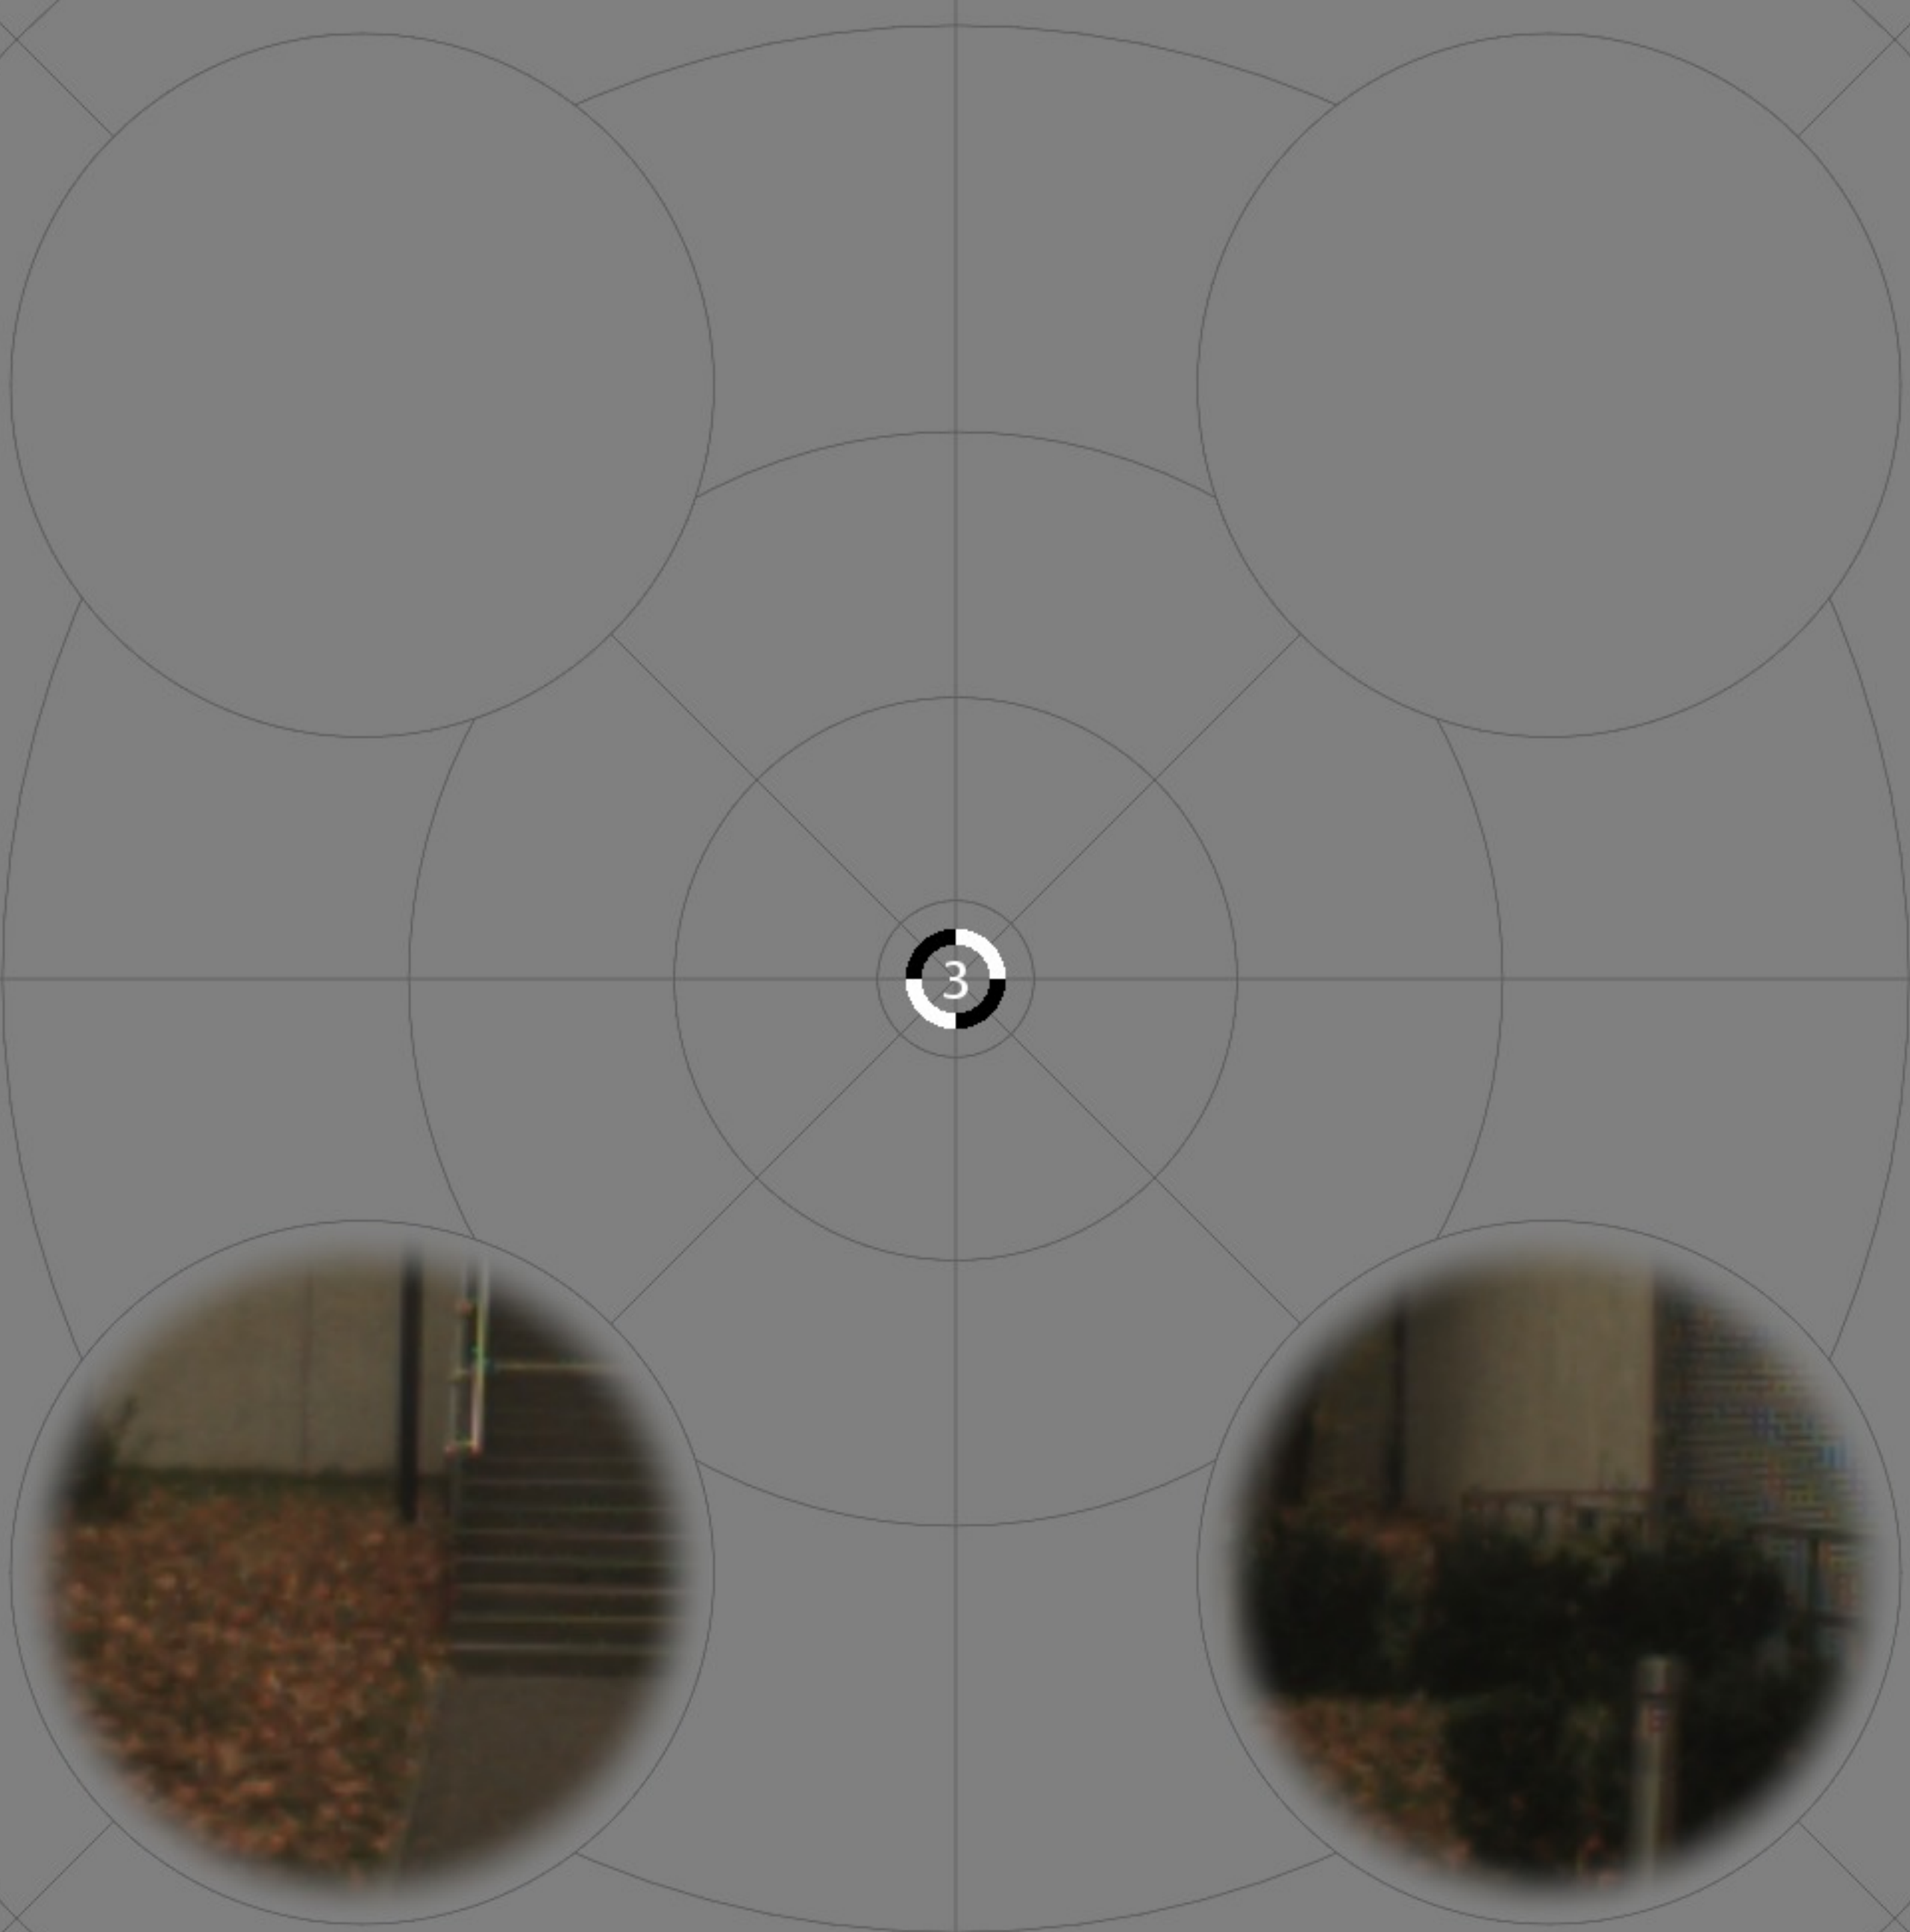

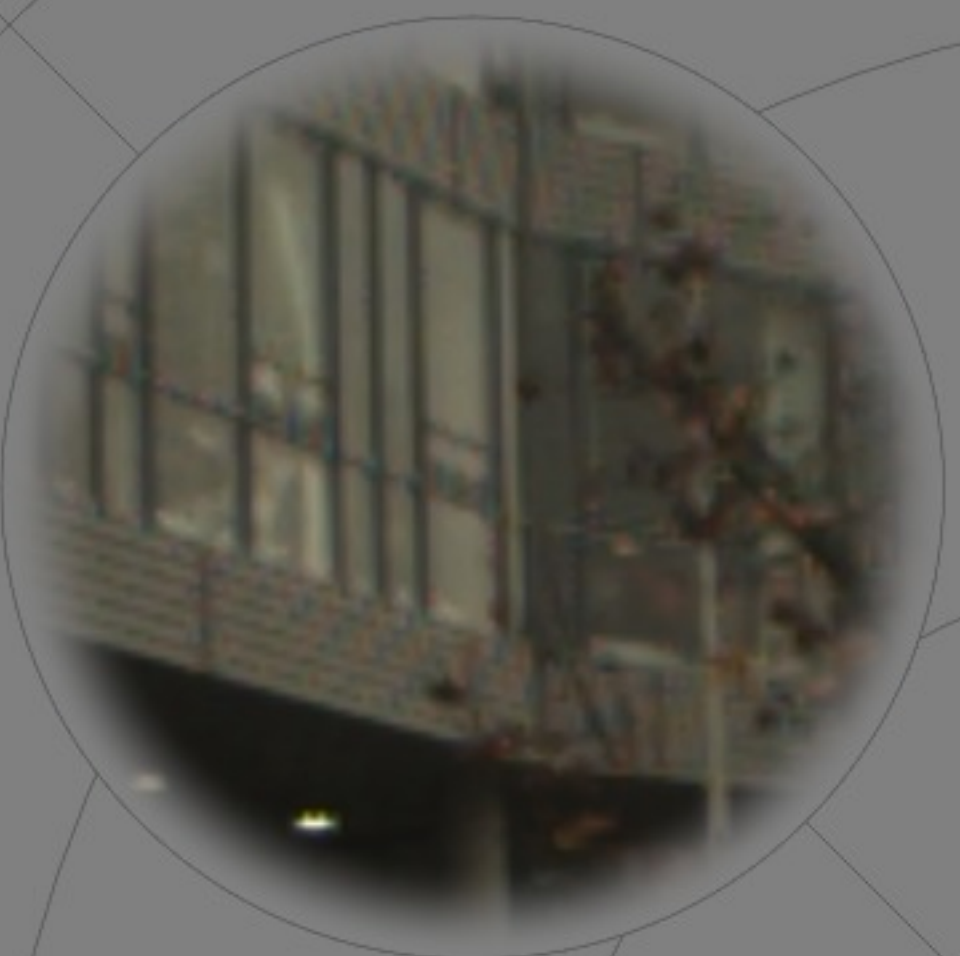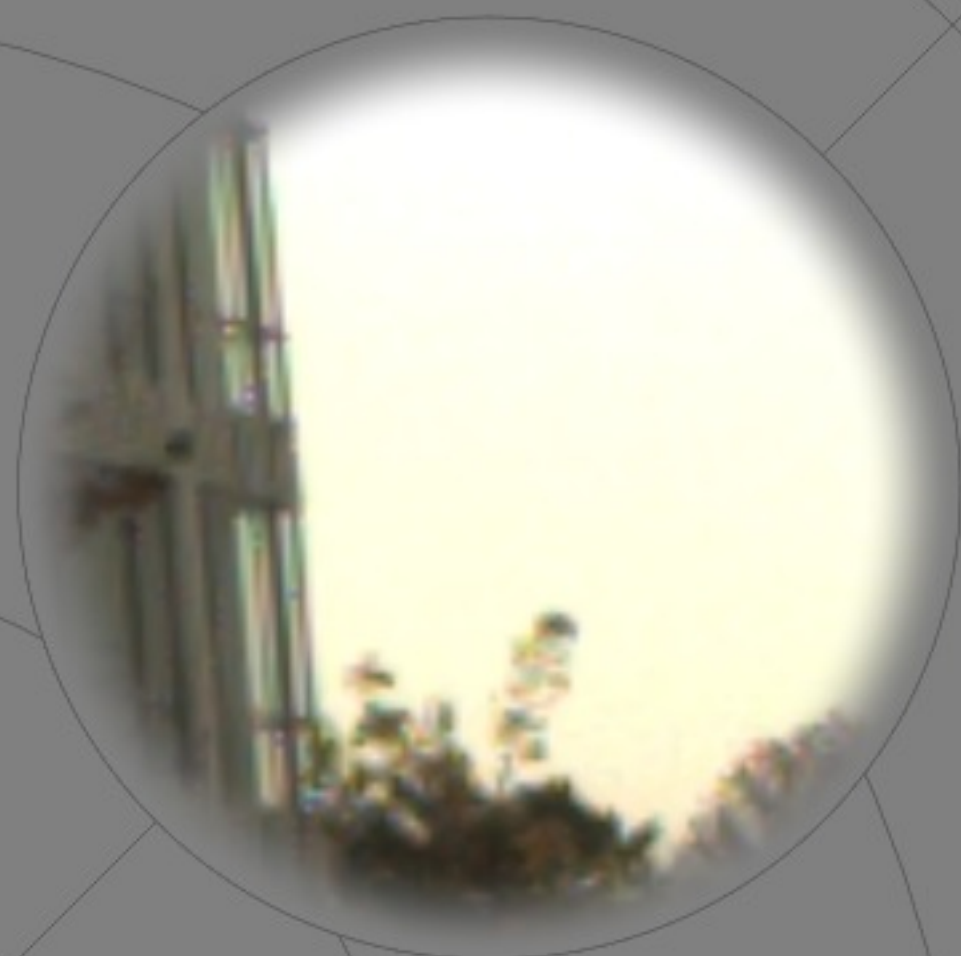

0

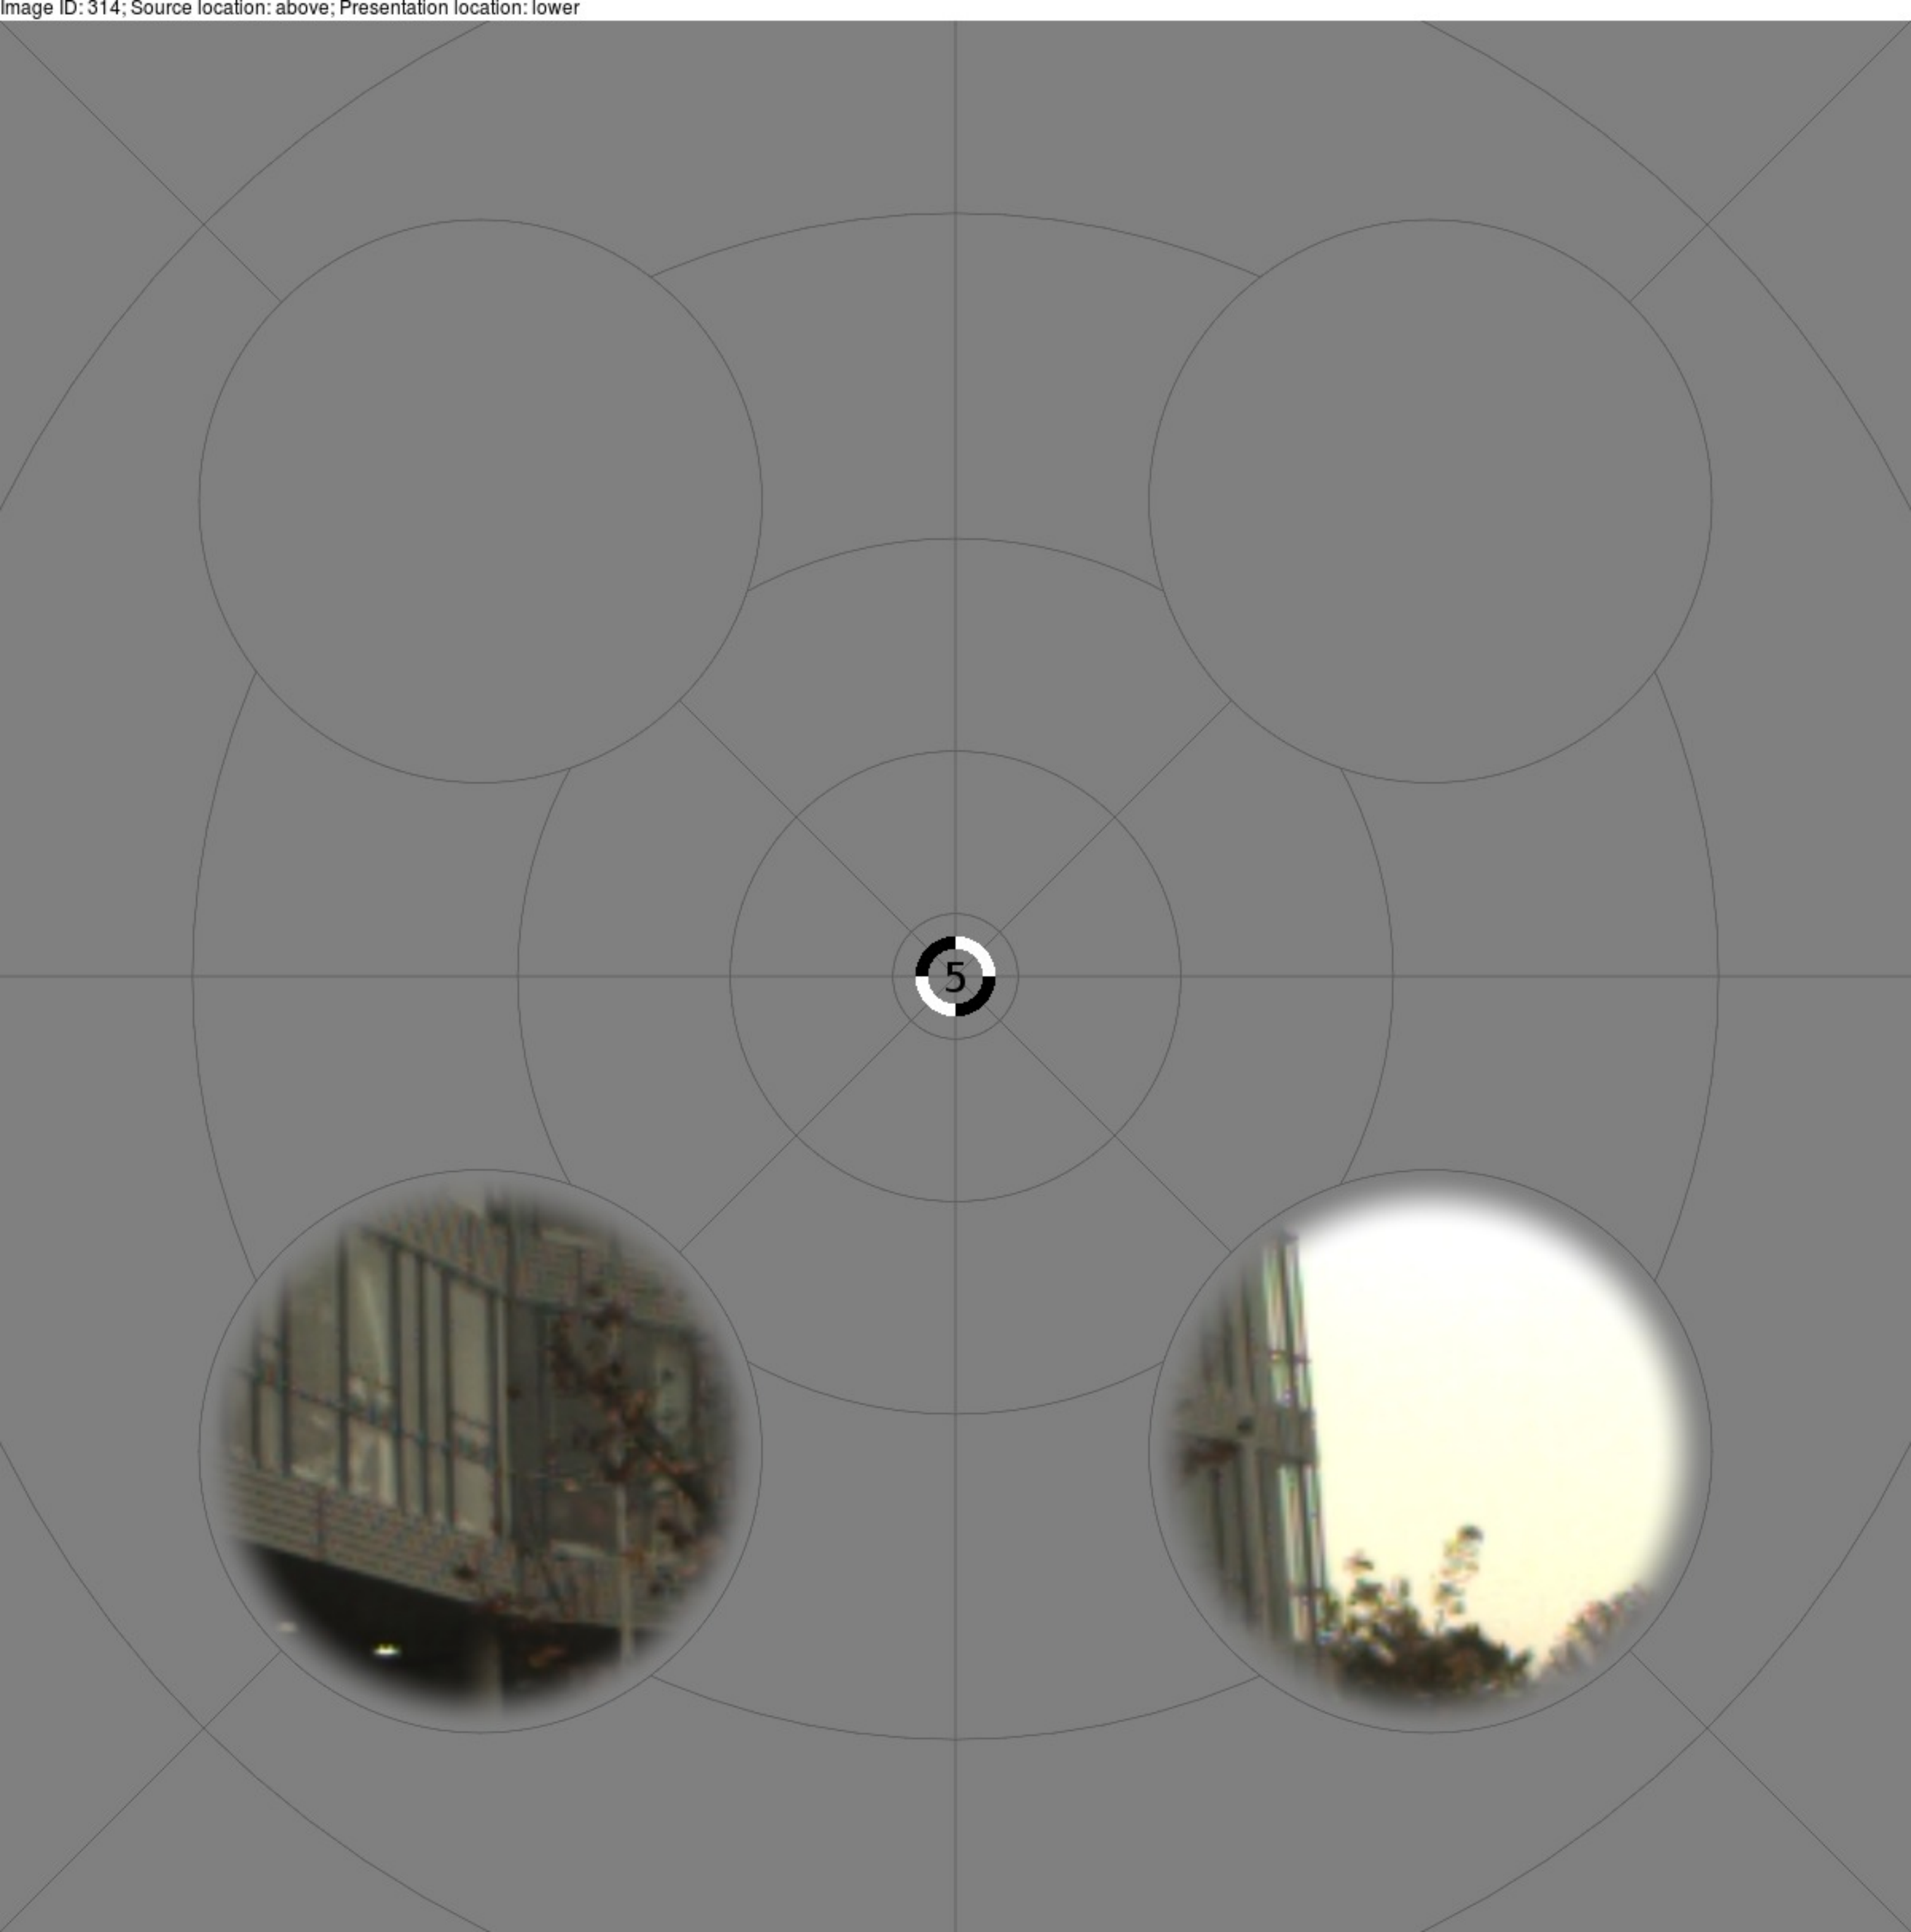



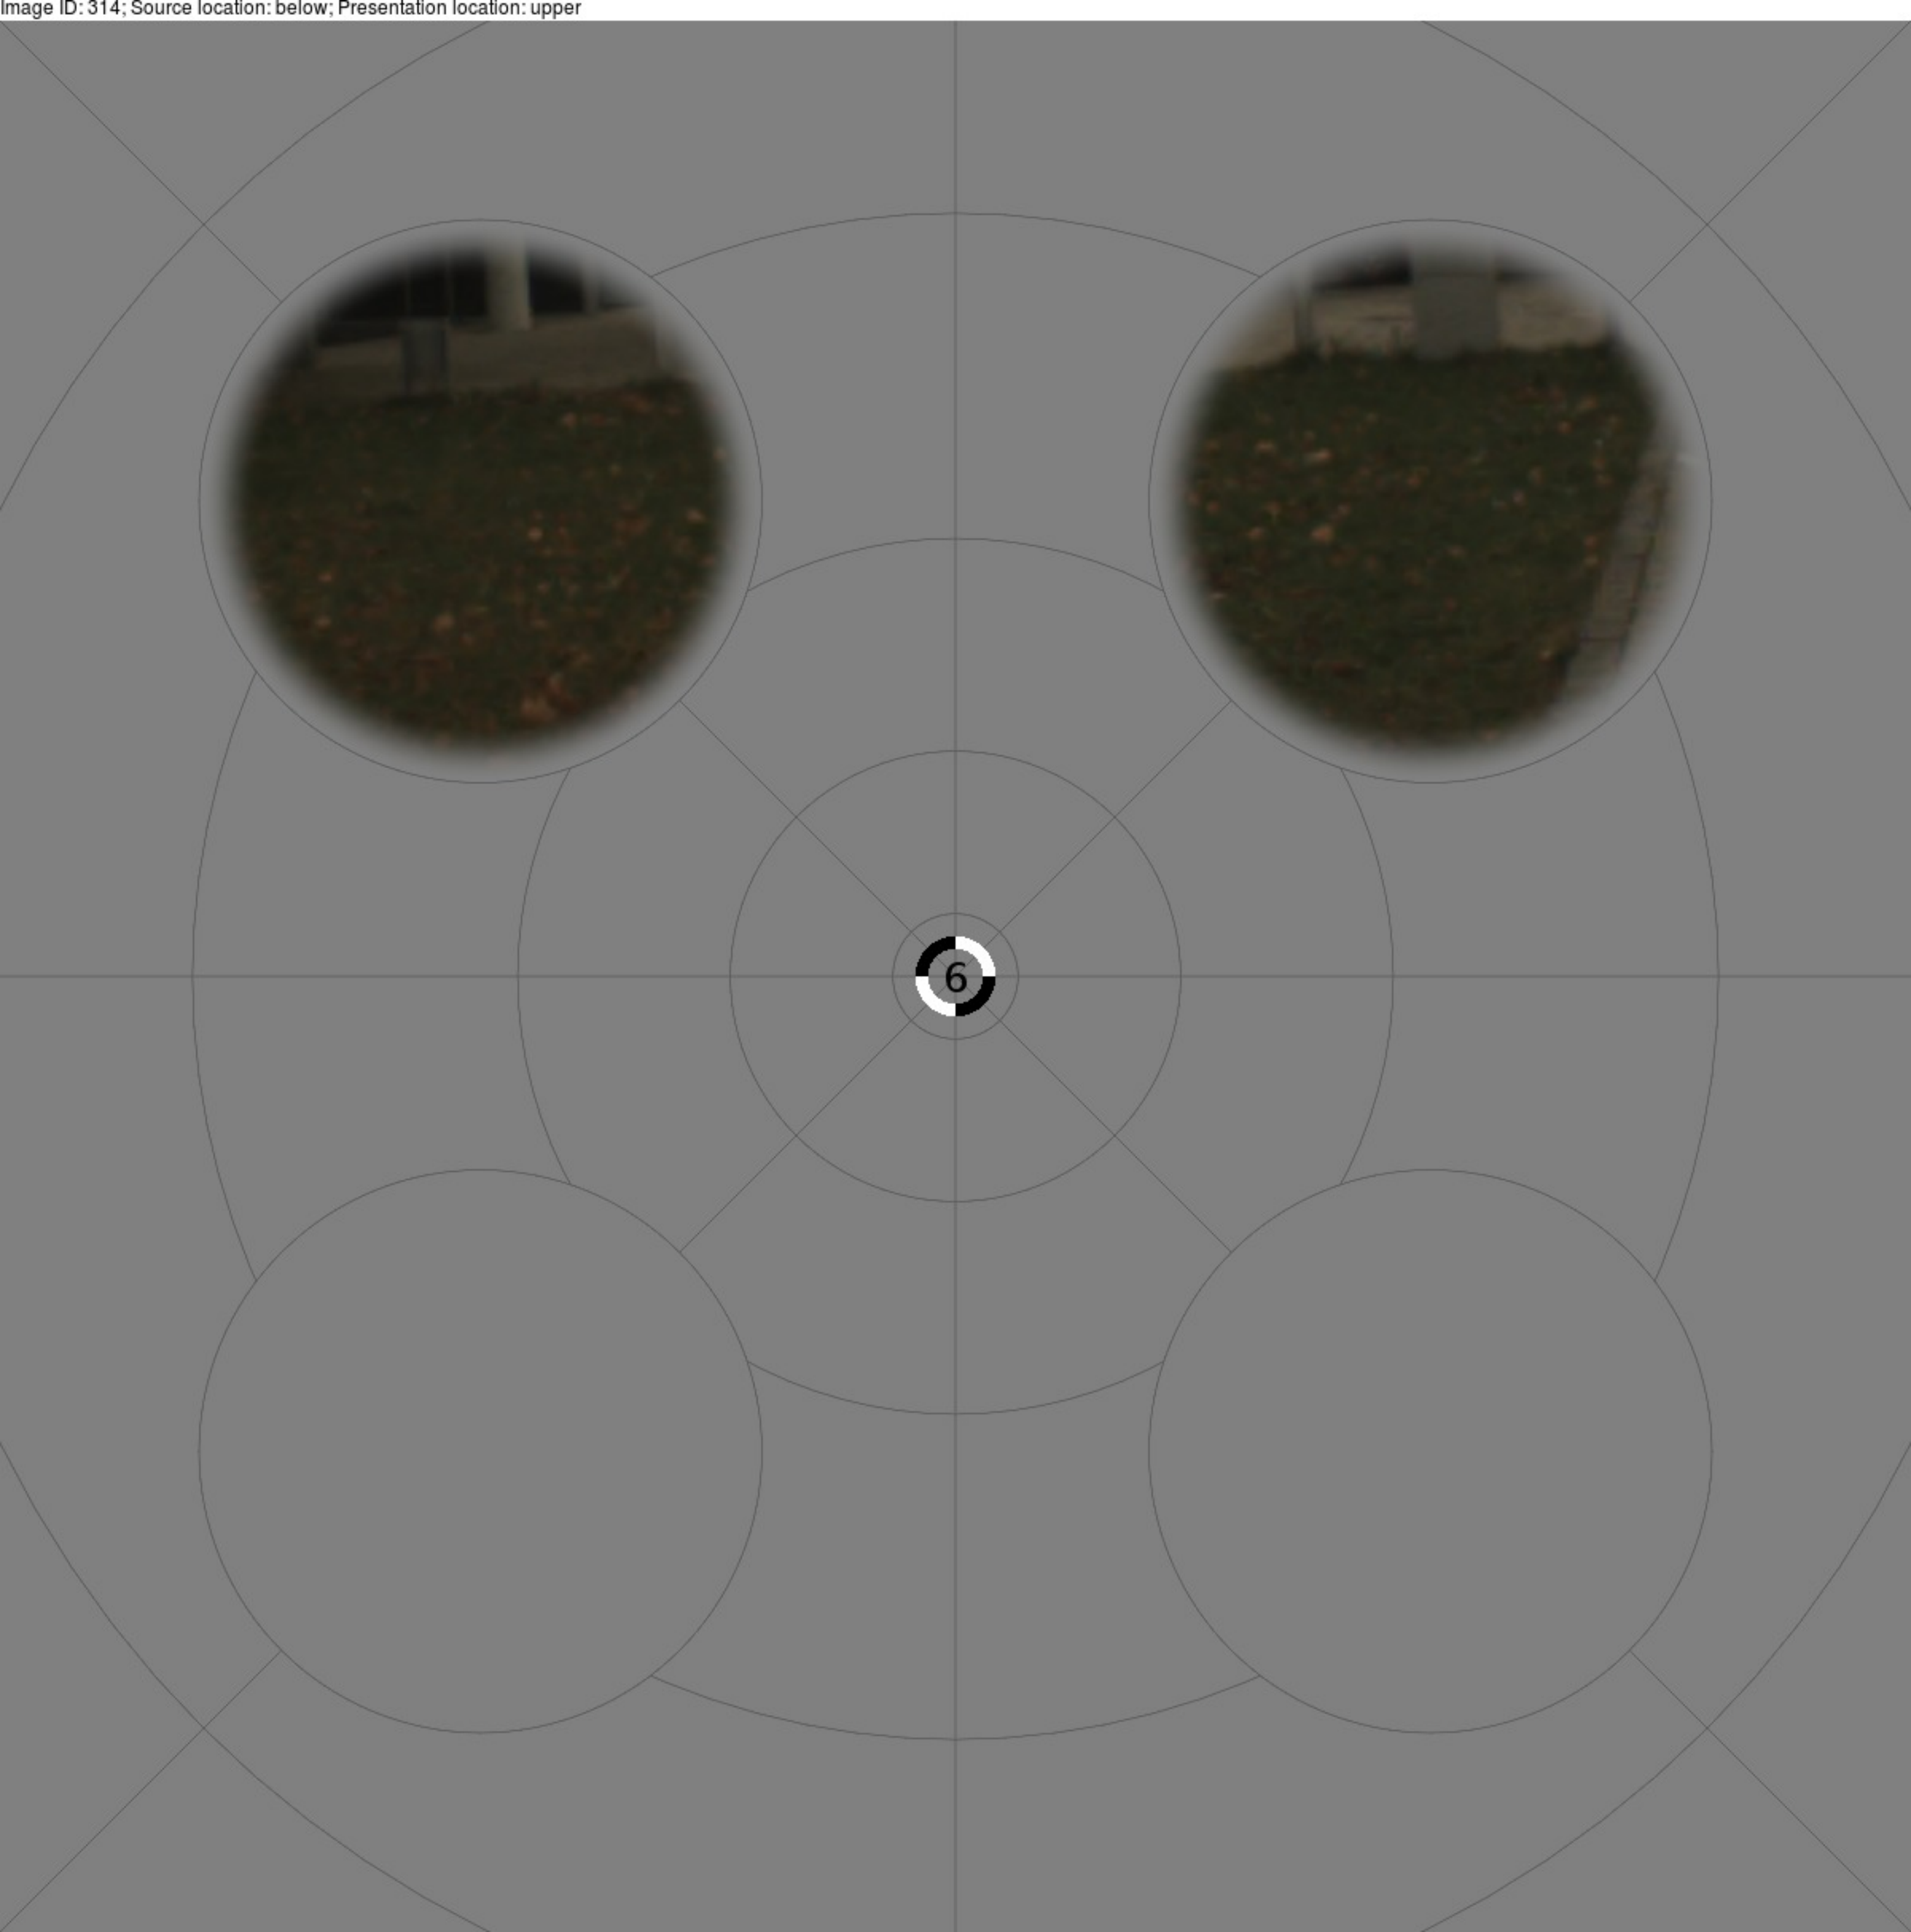

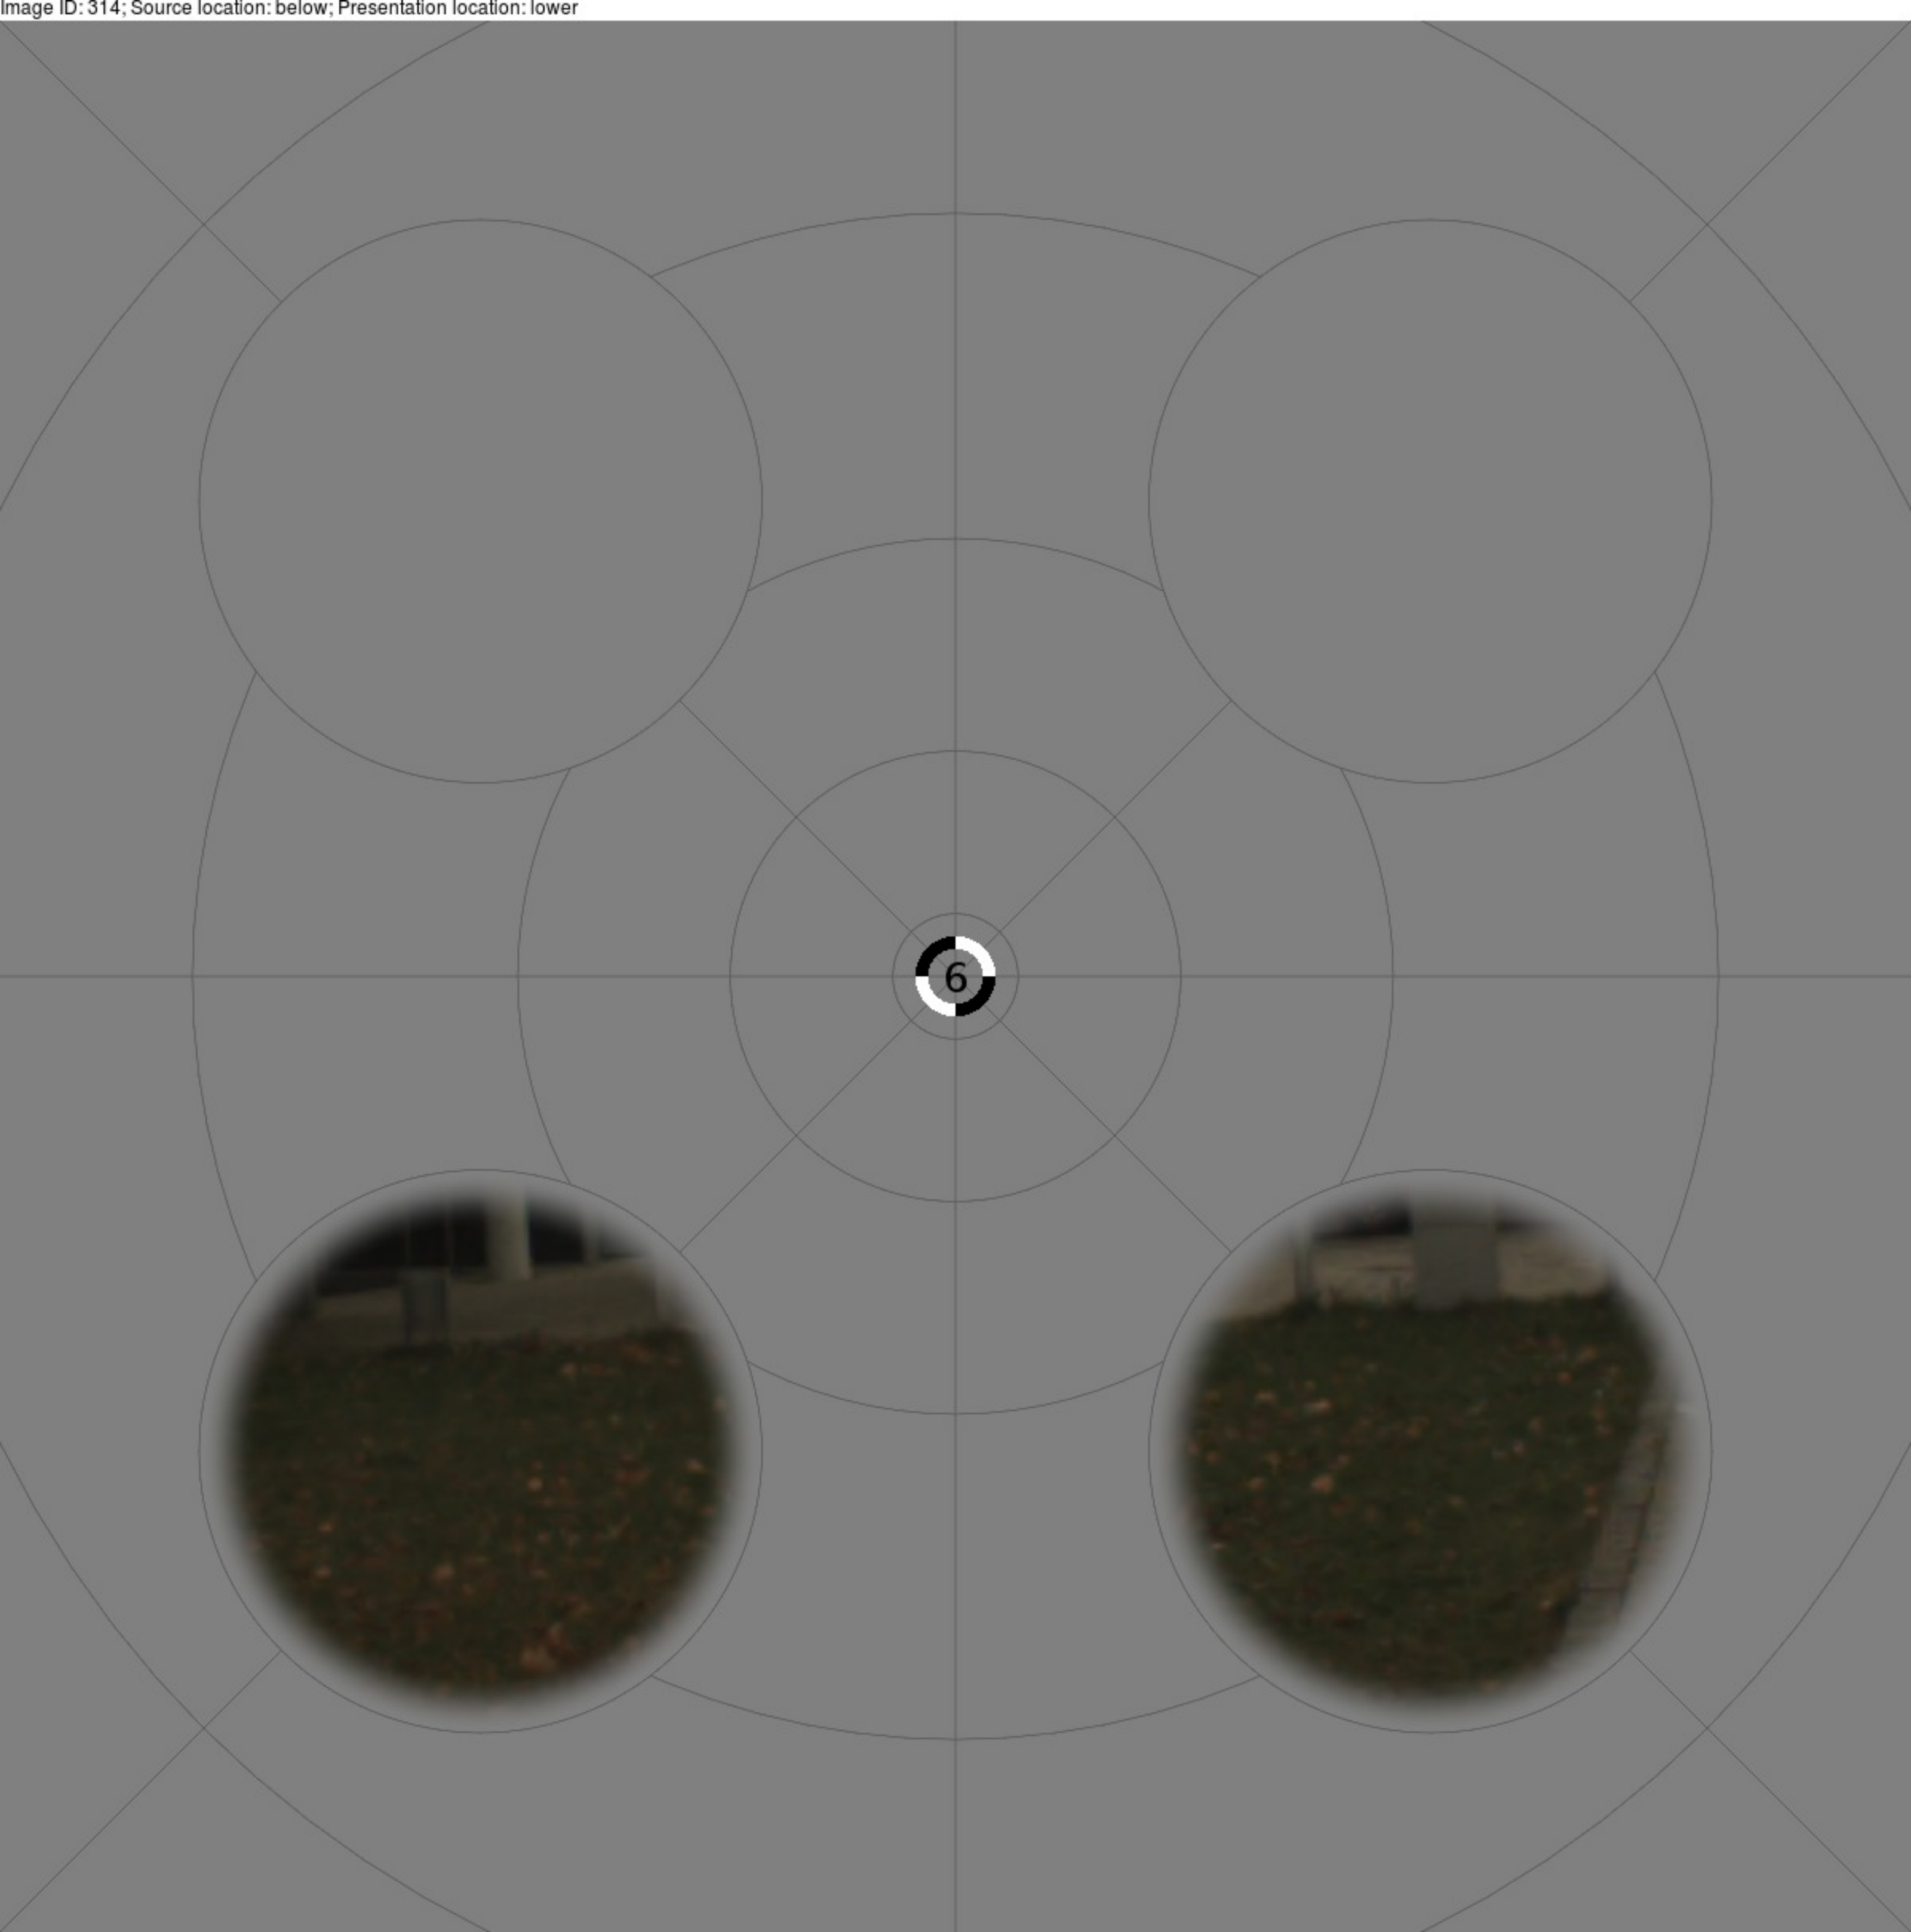

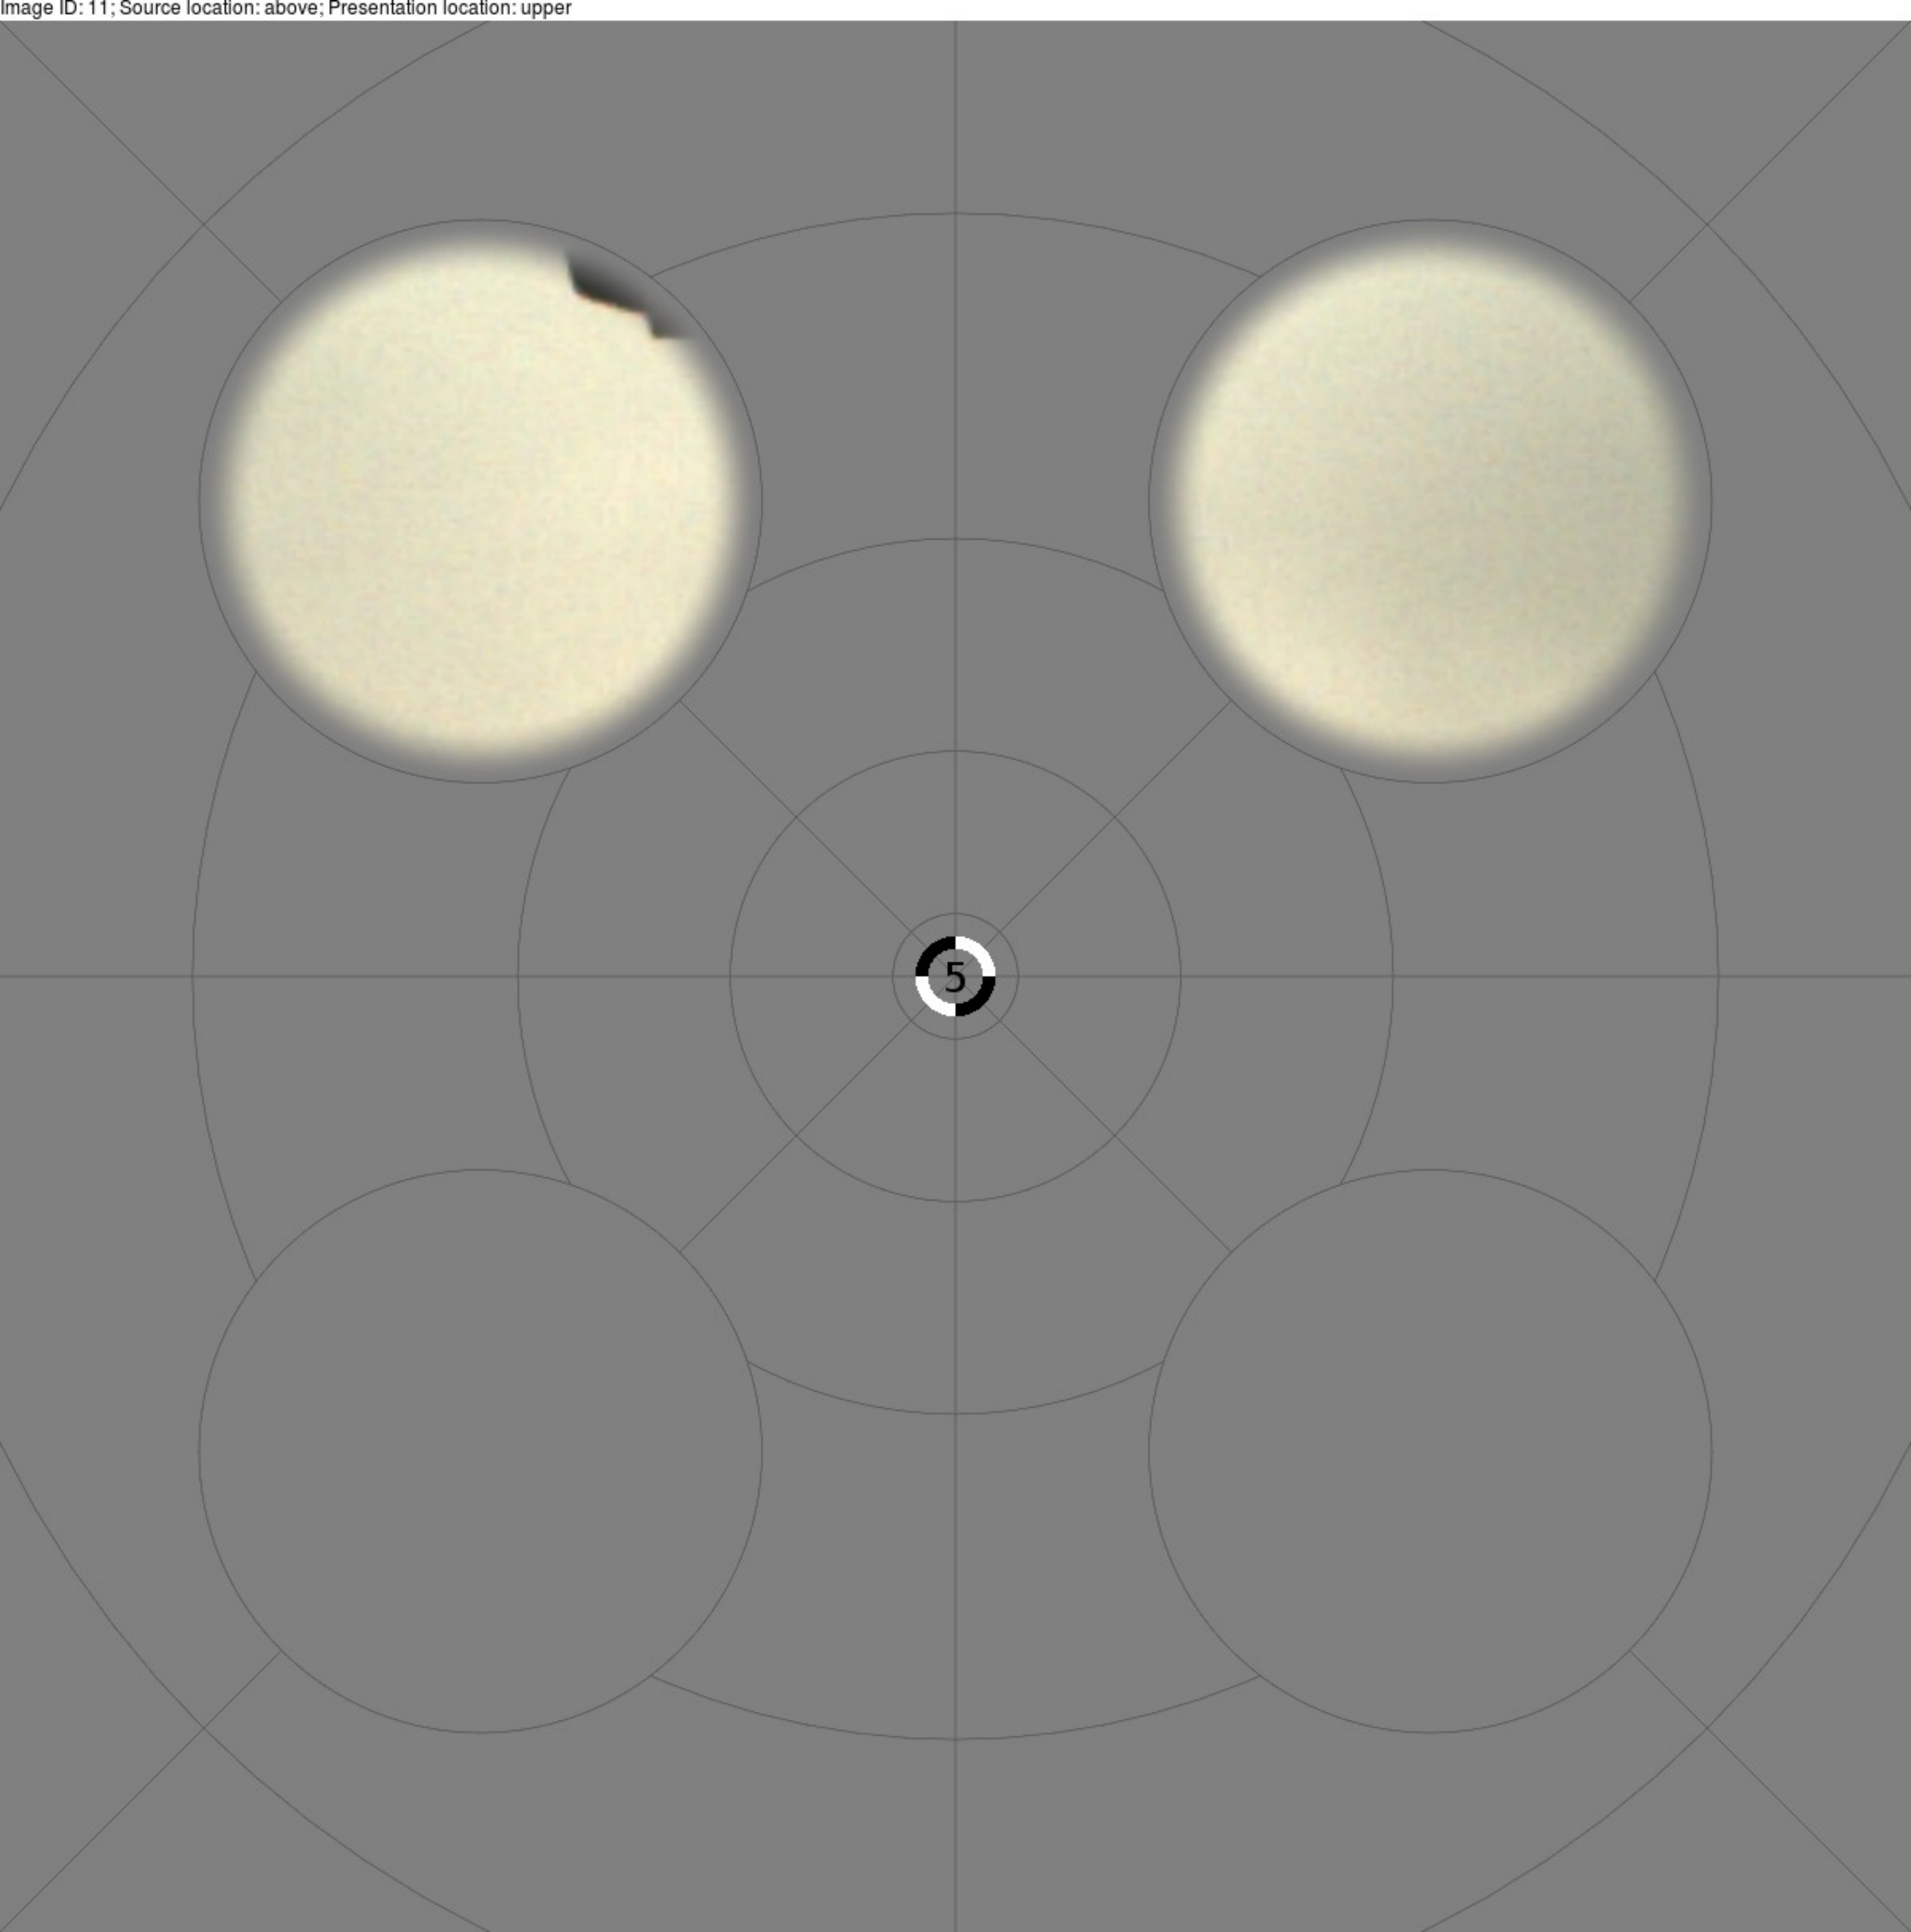



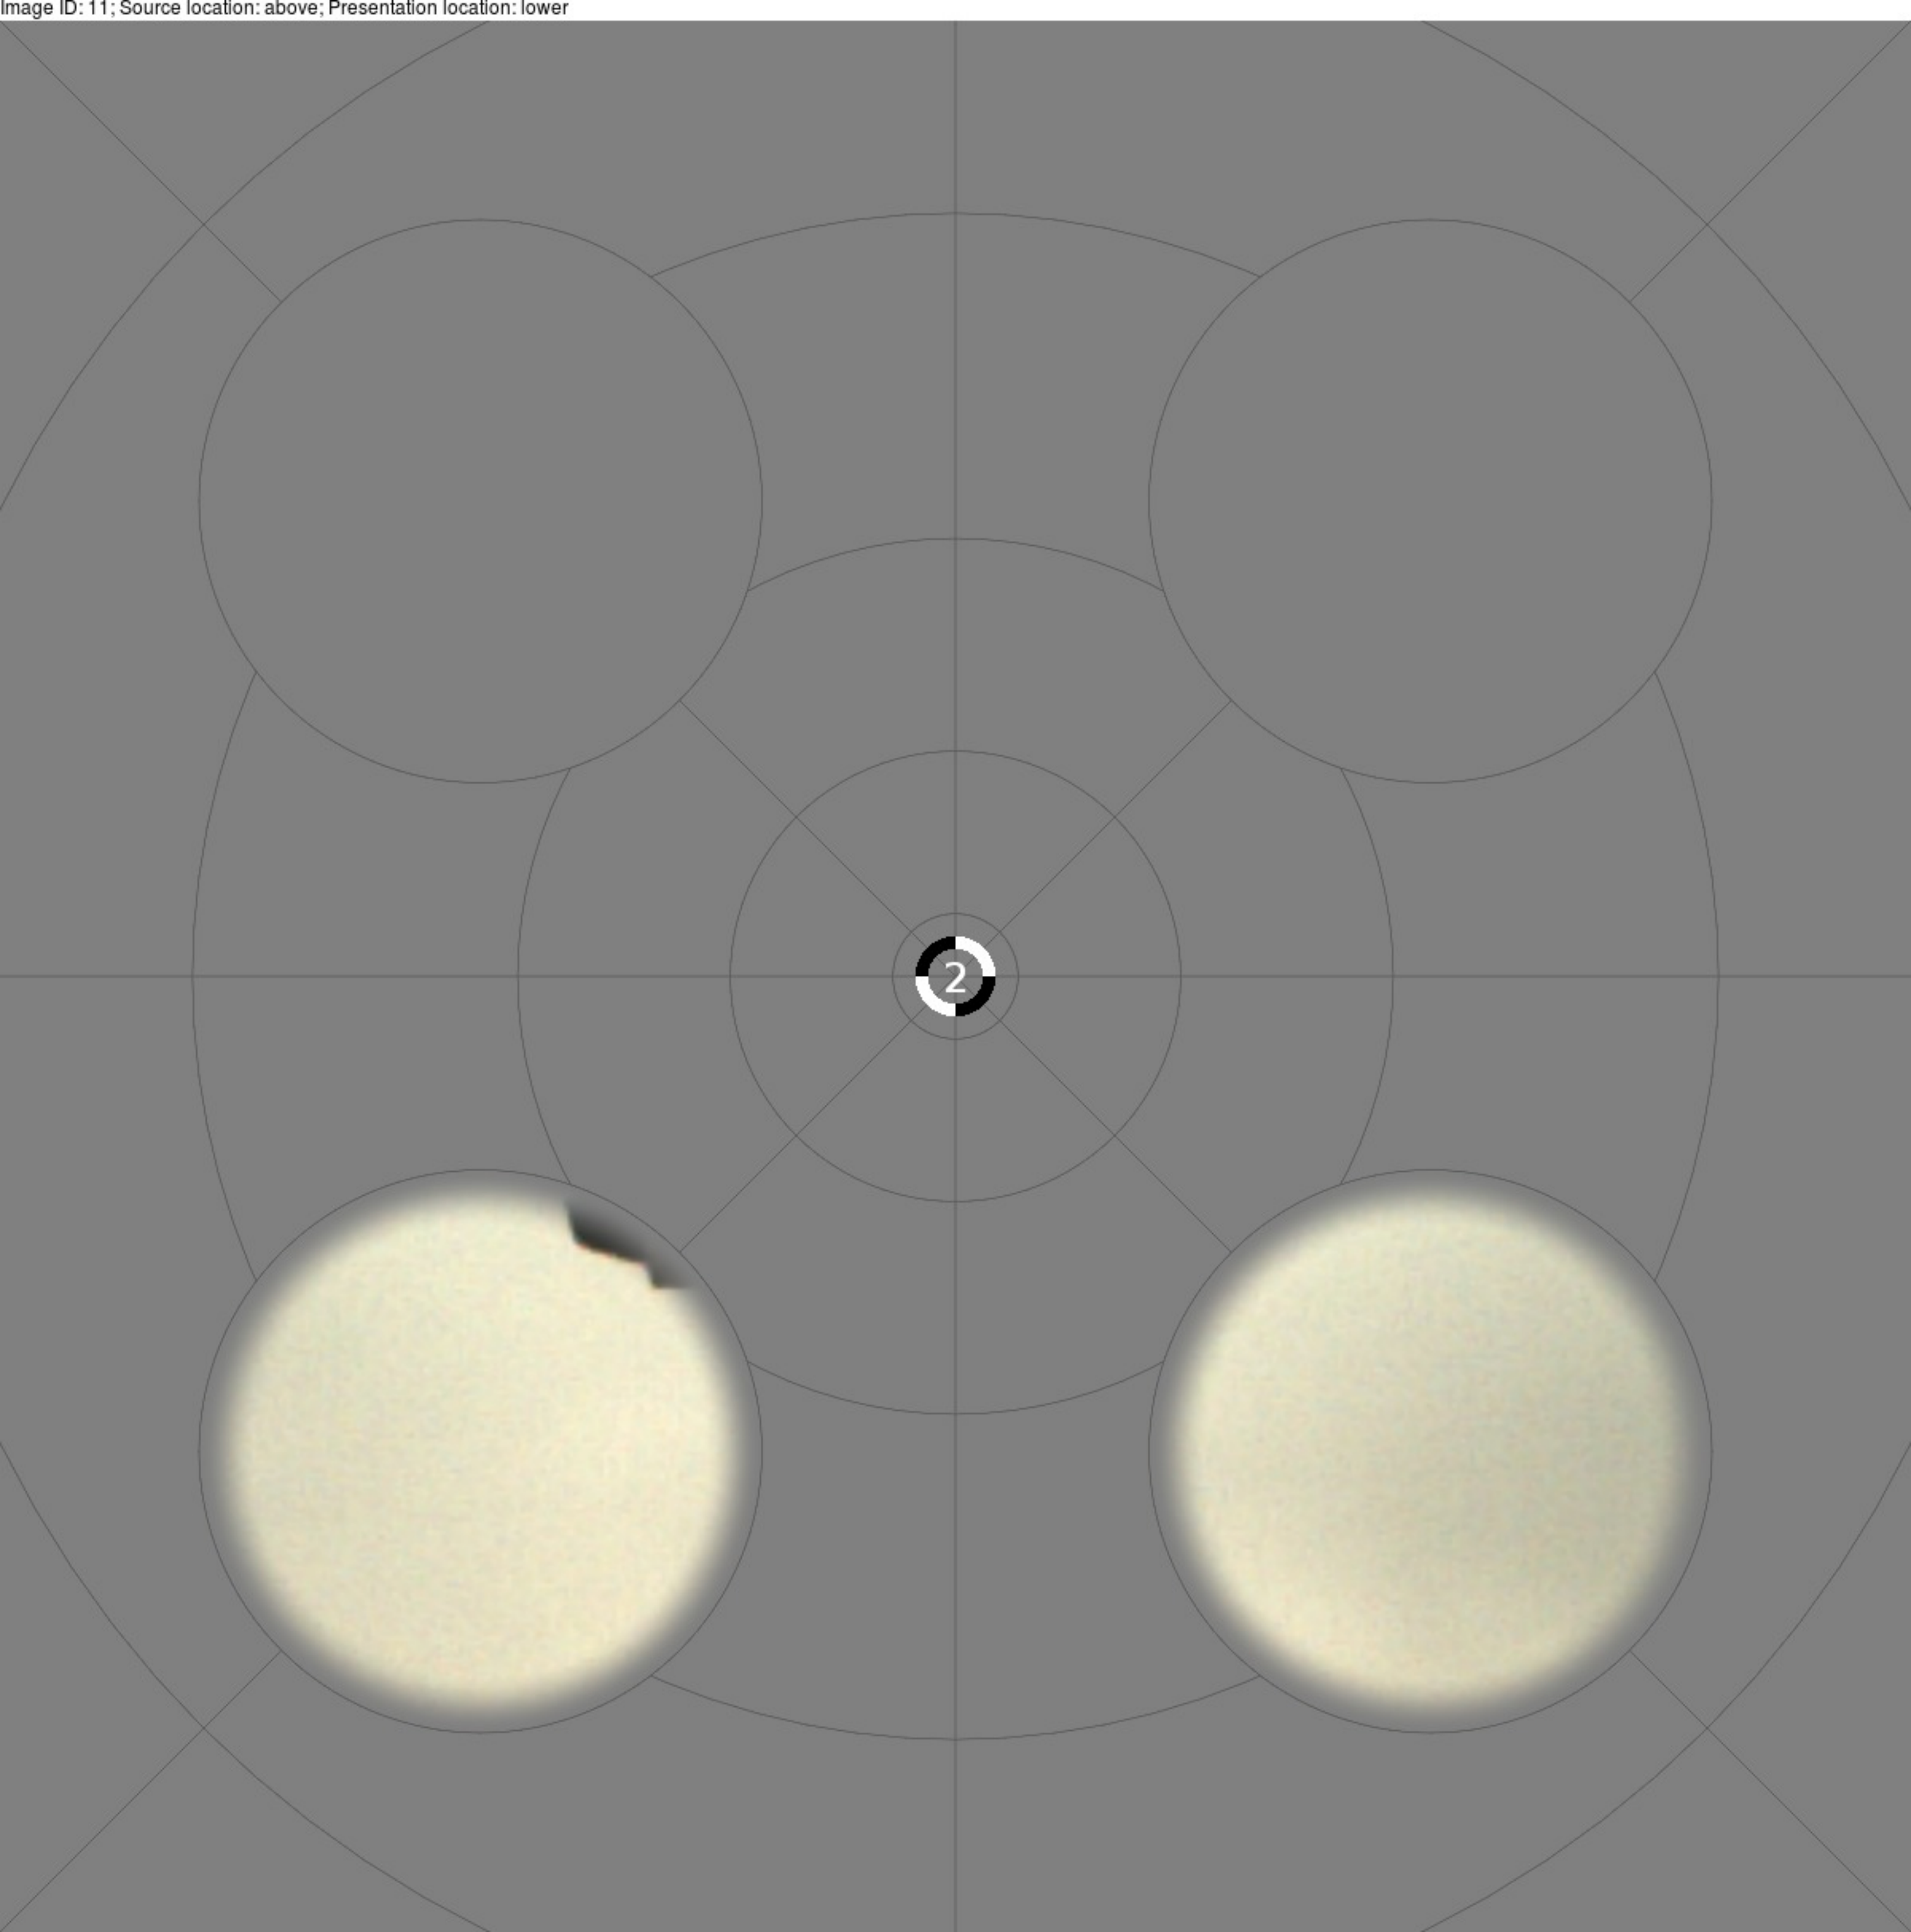

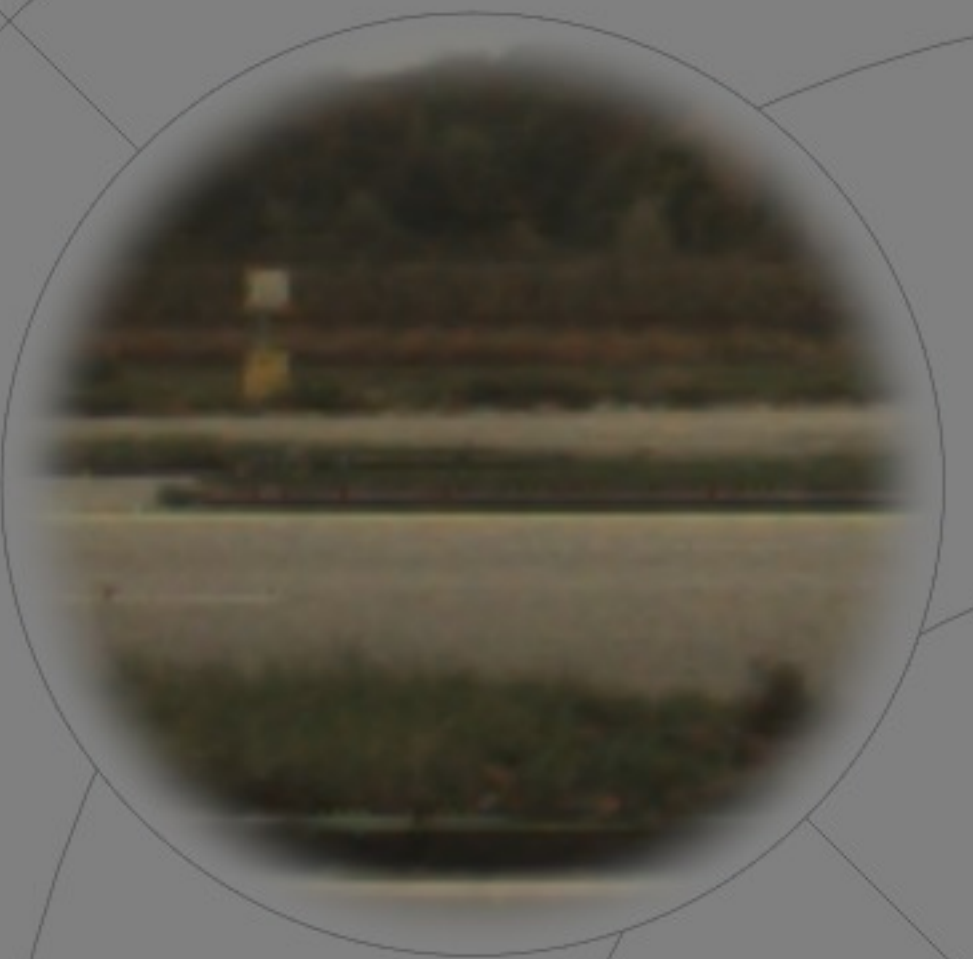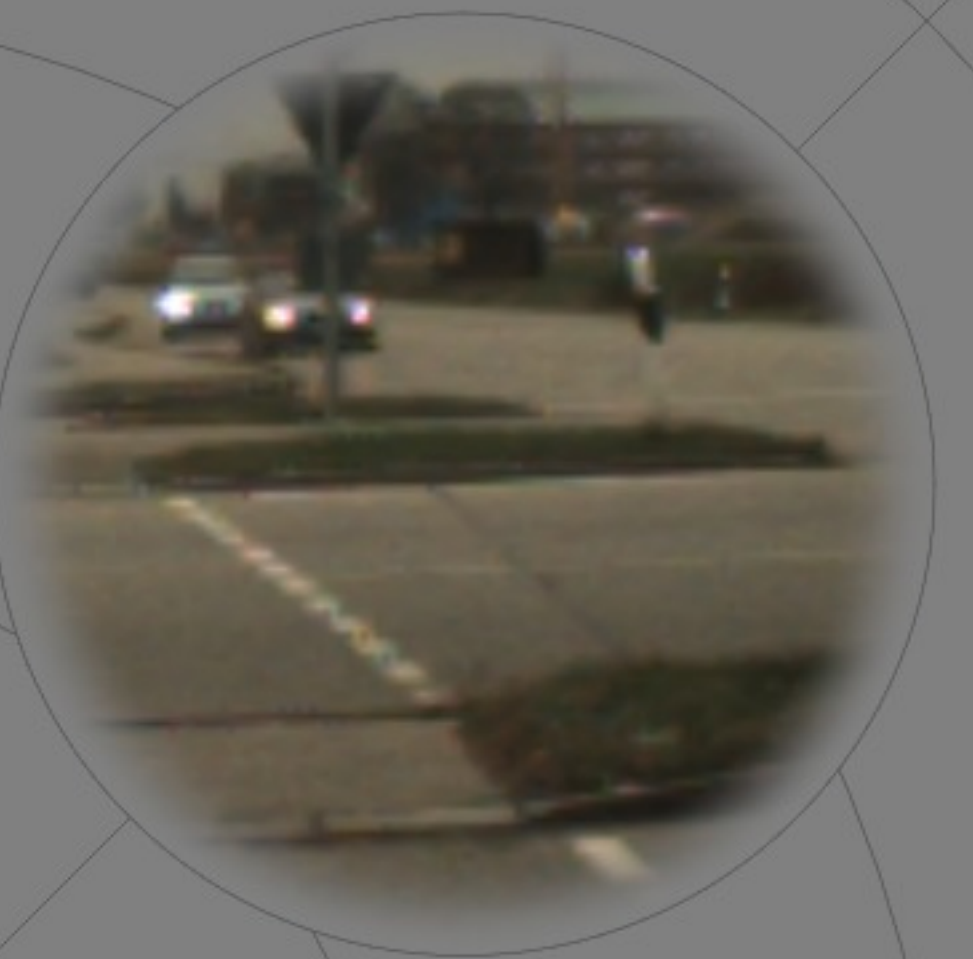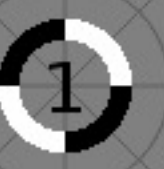

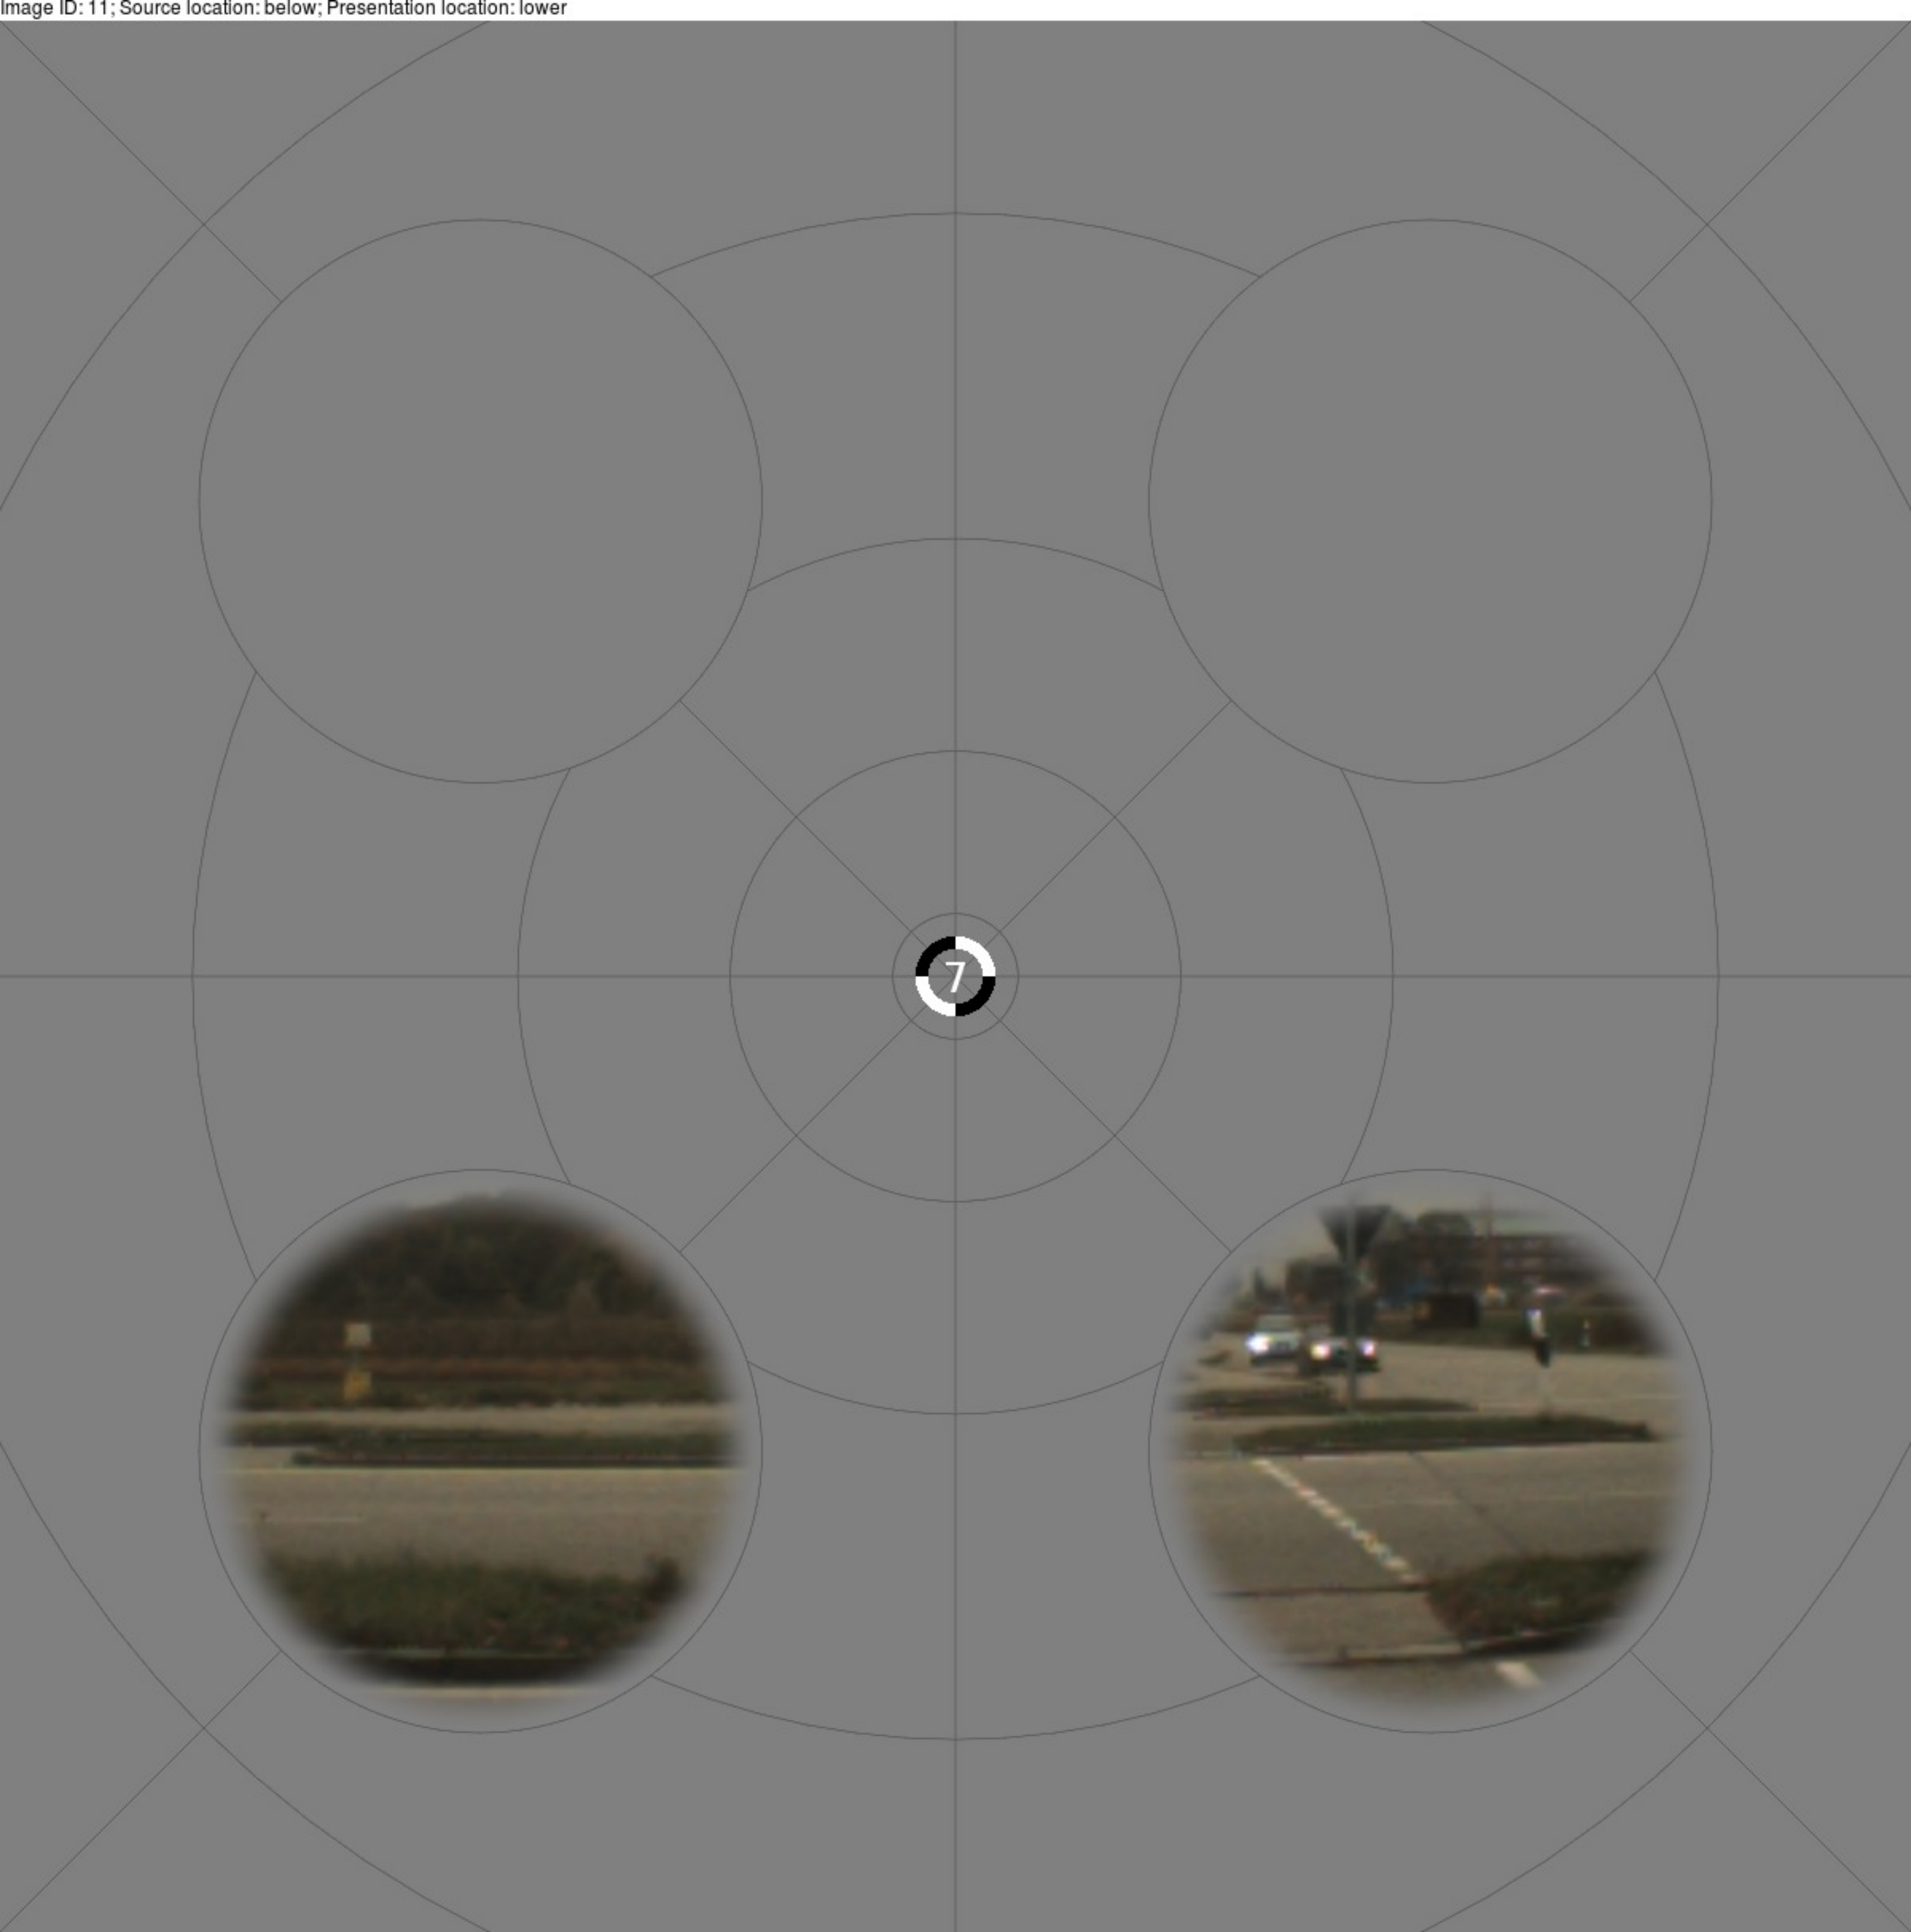



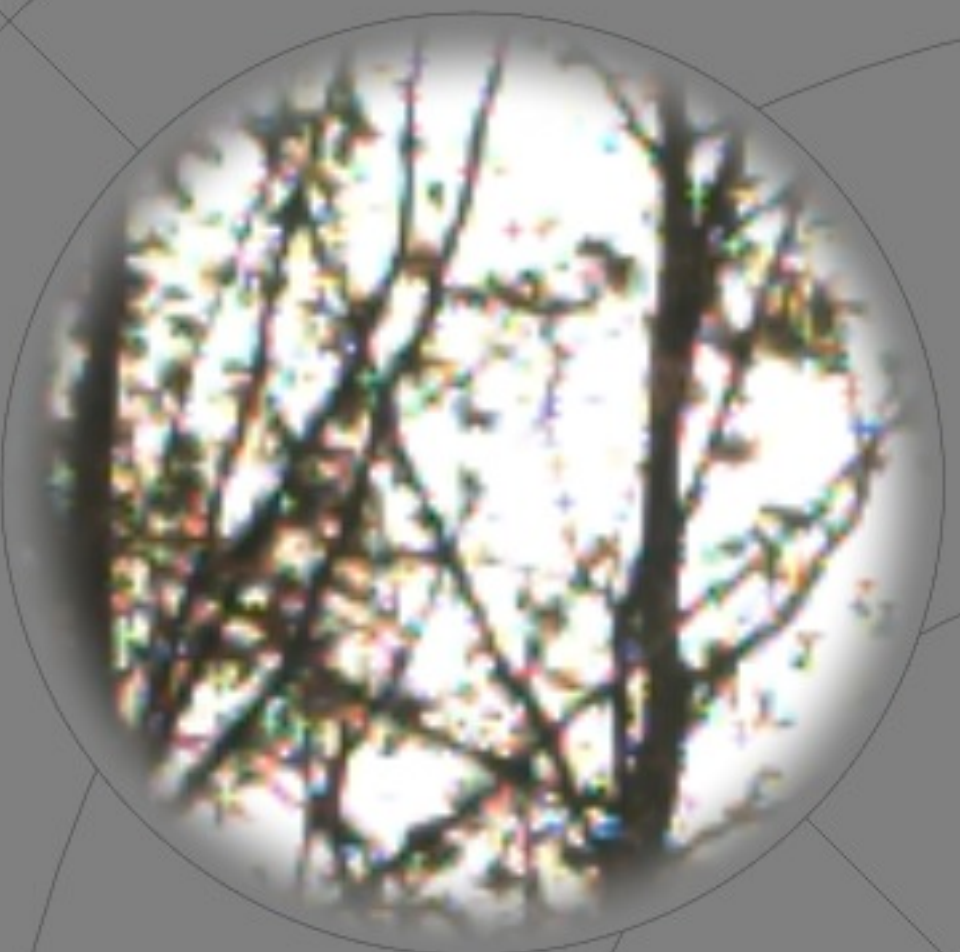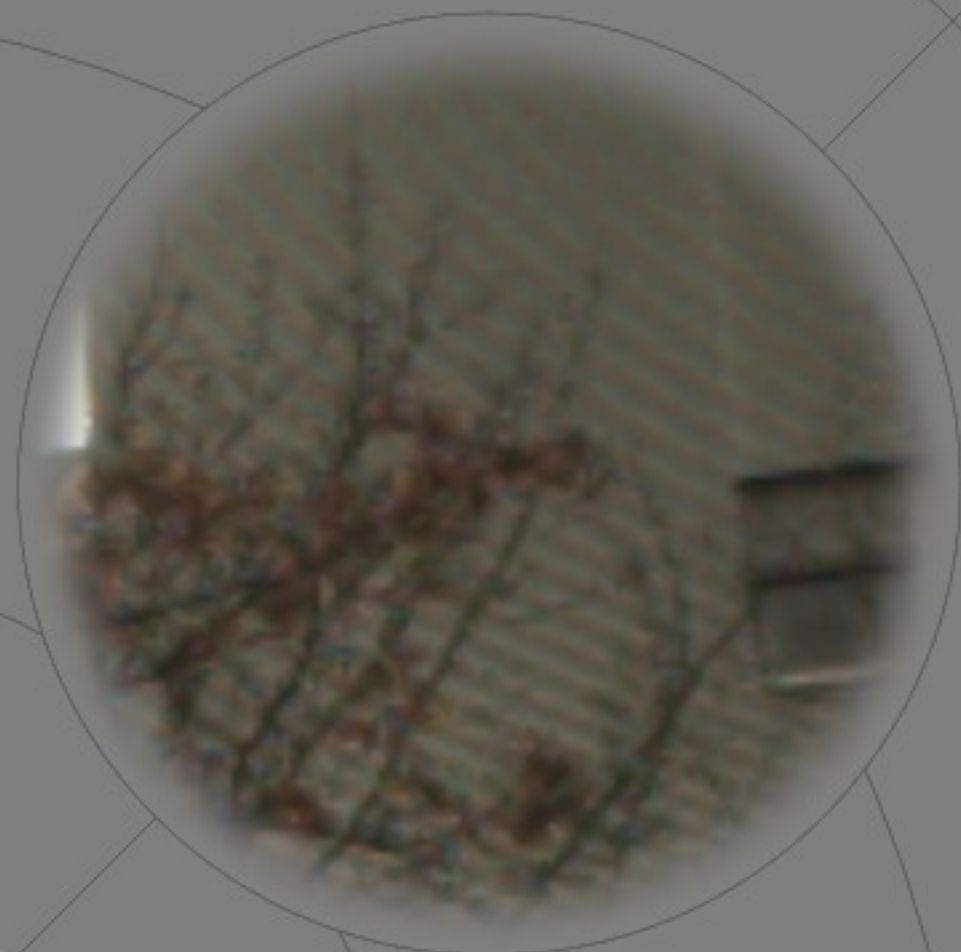

2

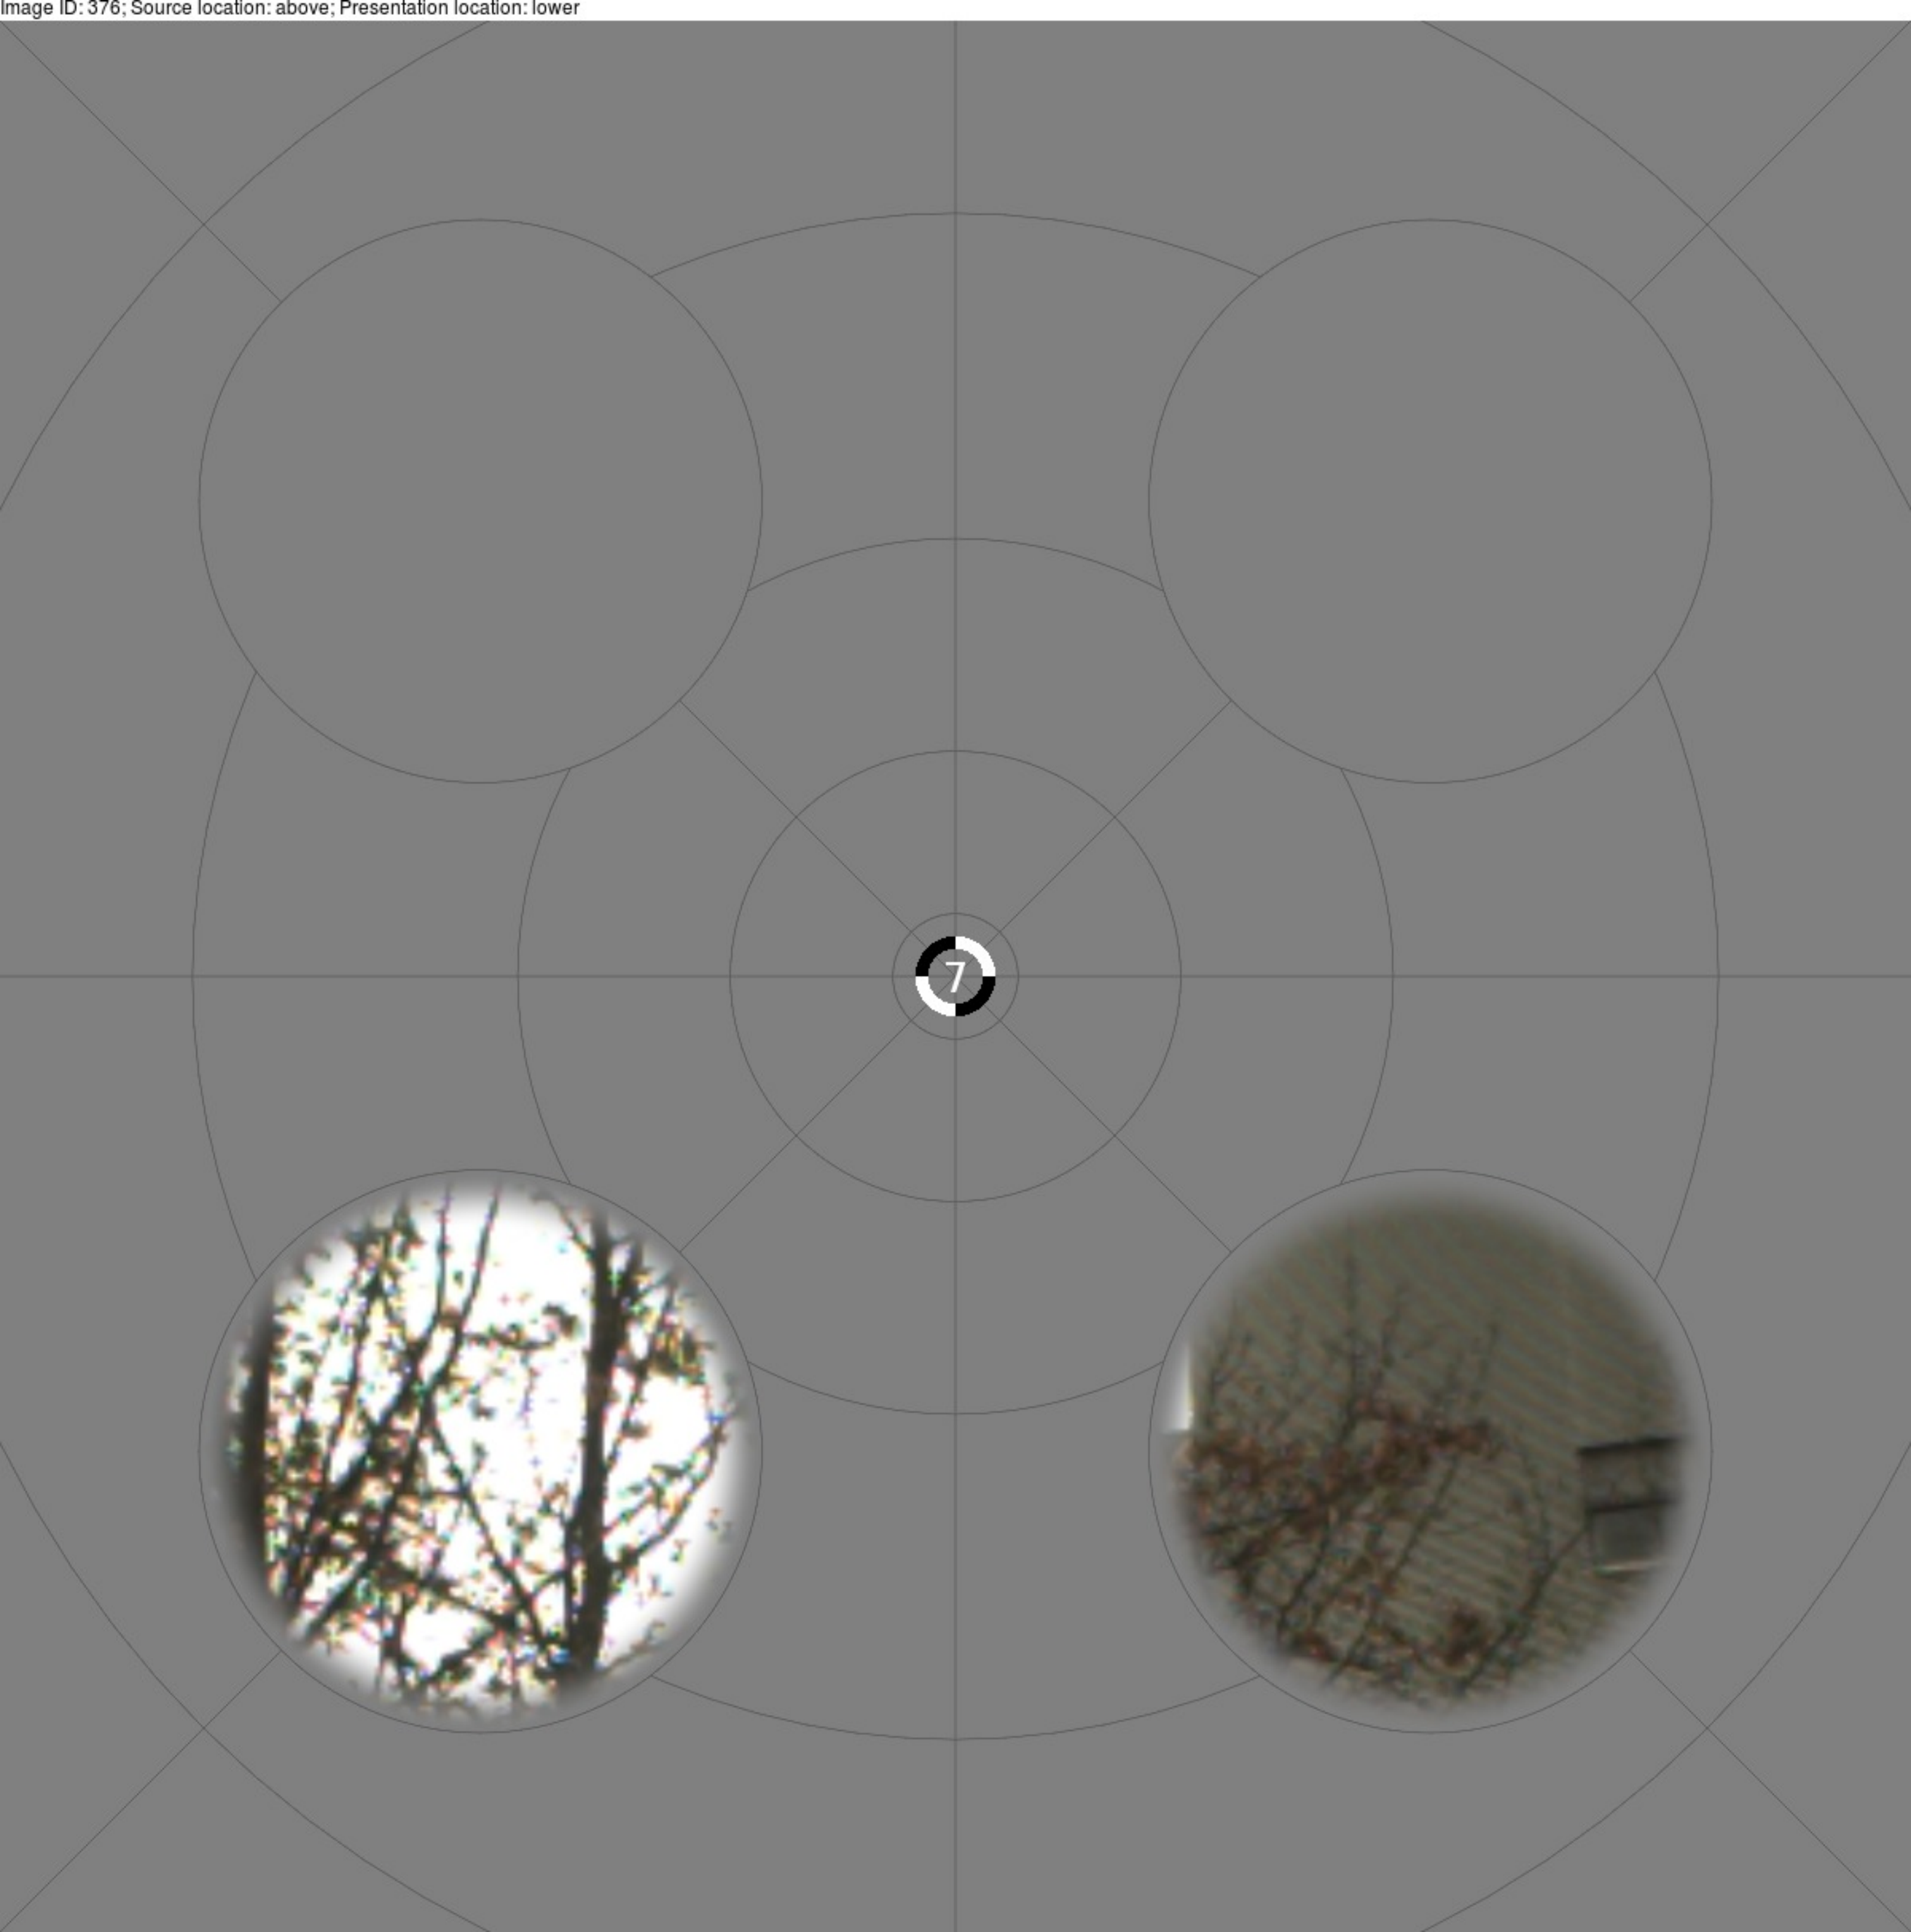



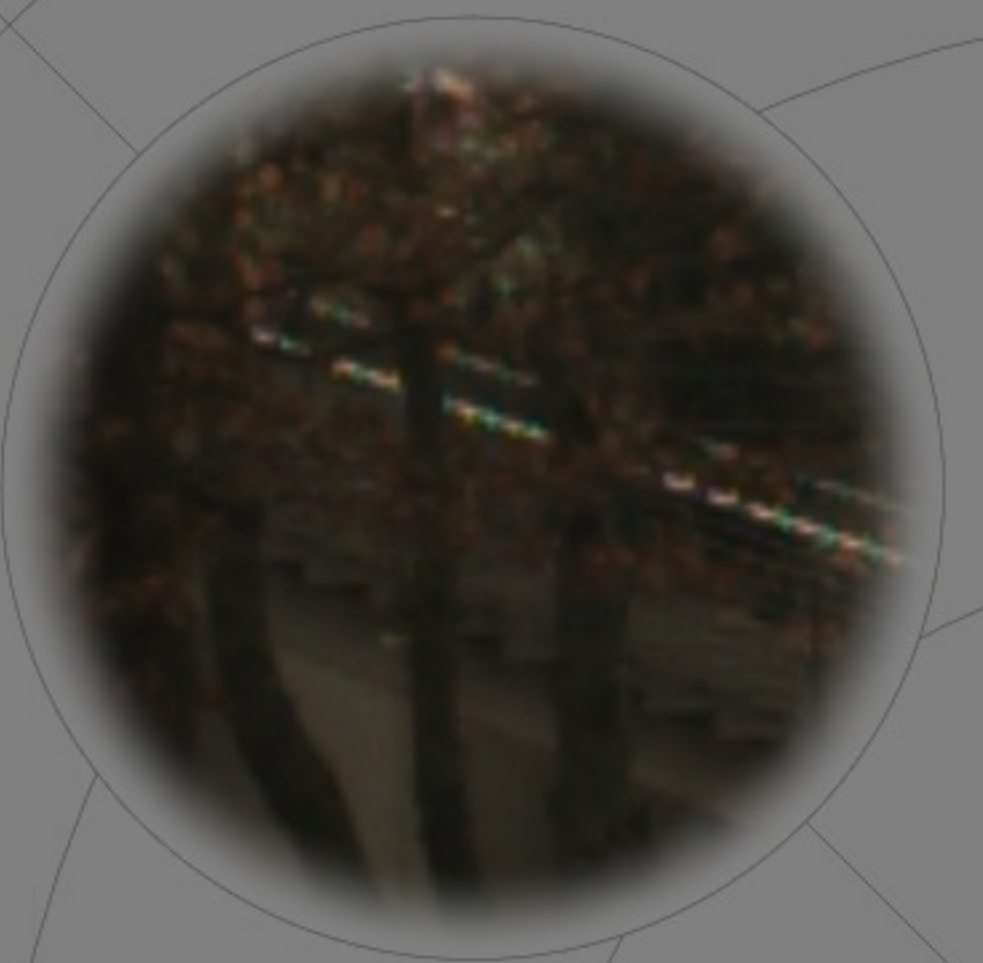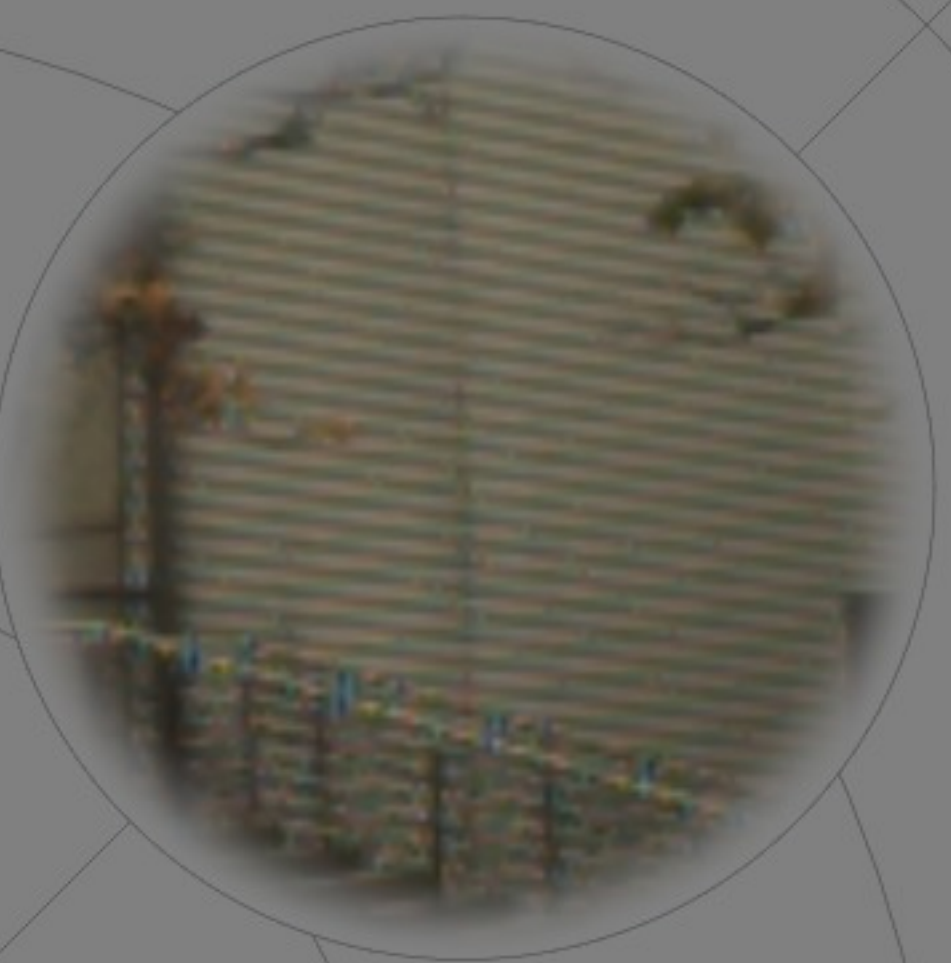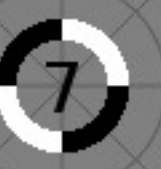



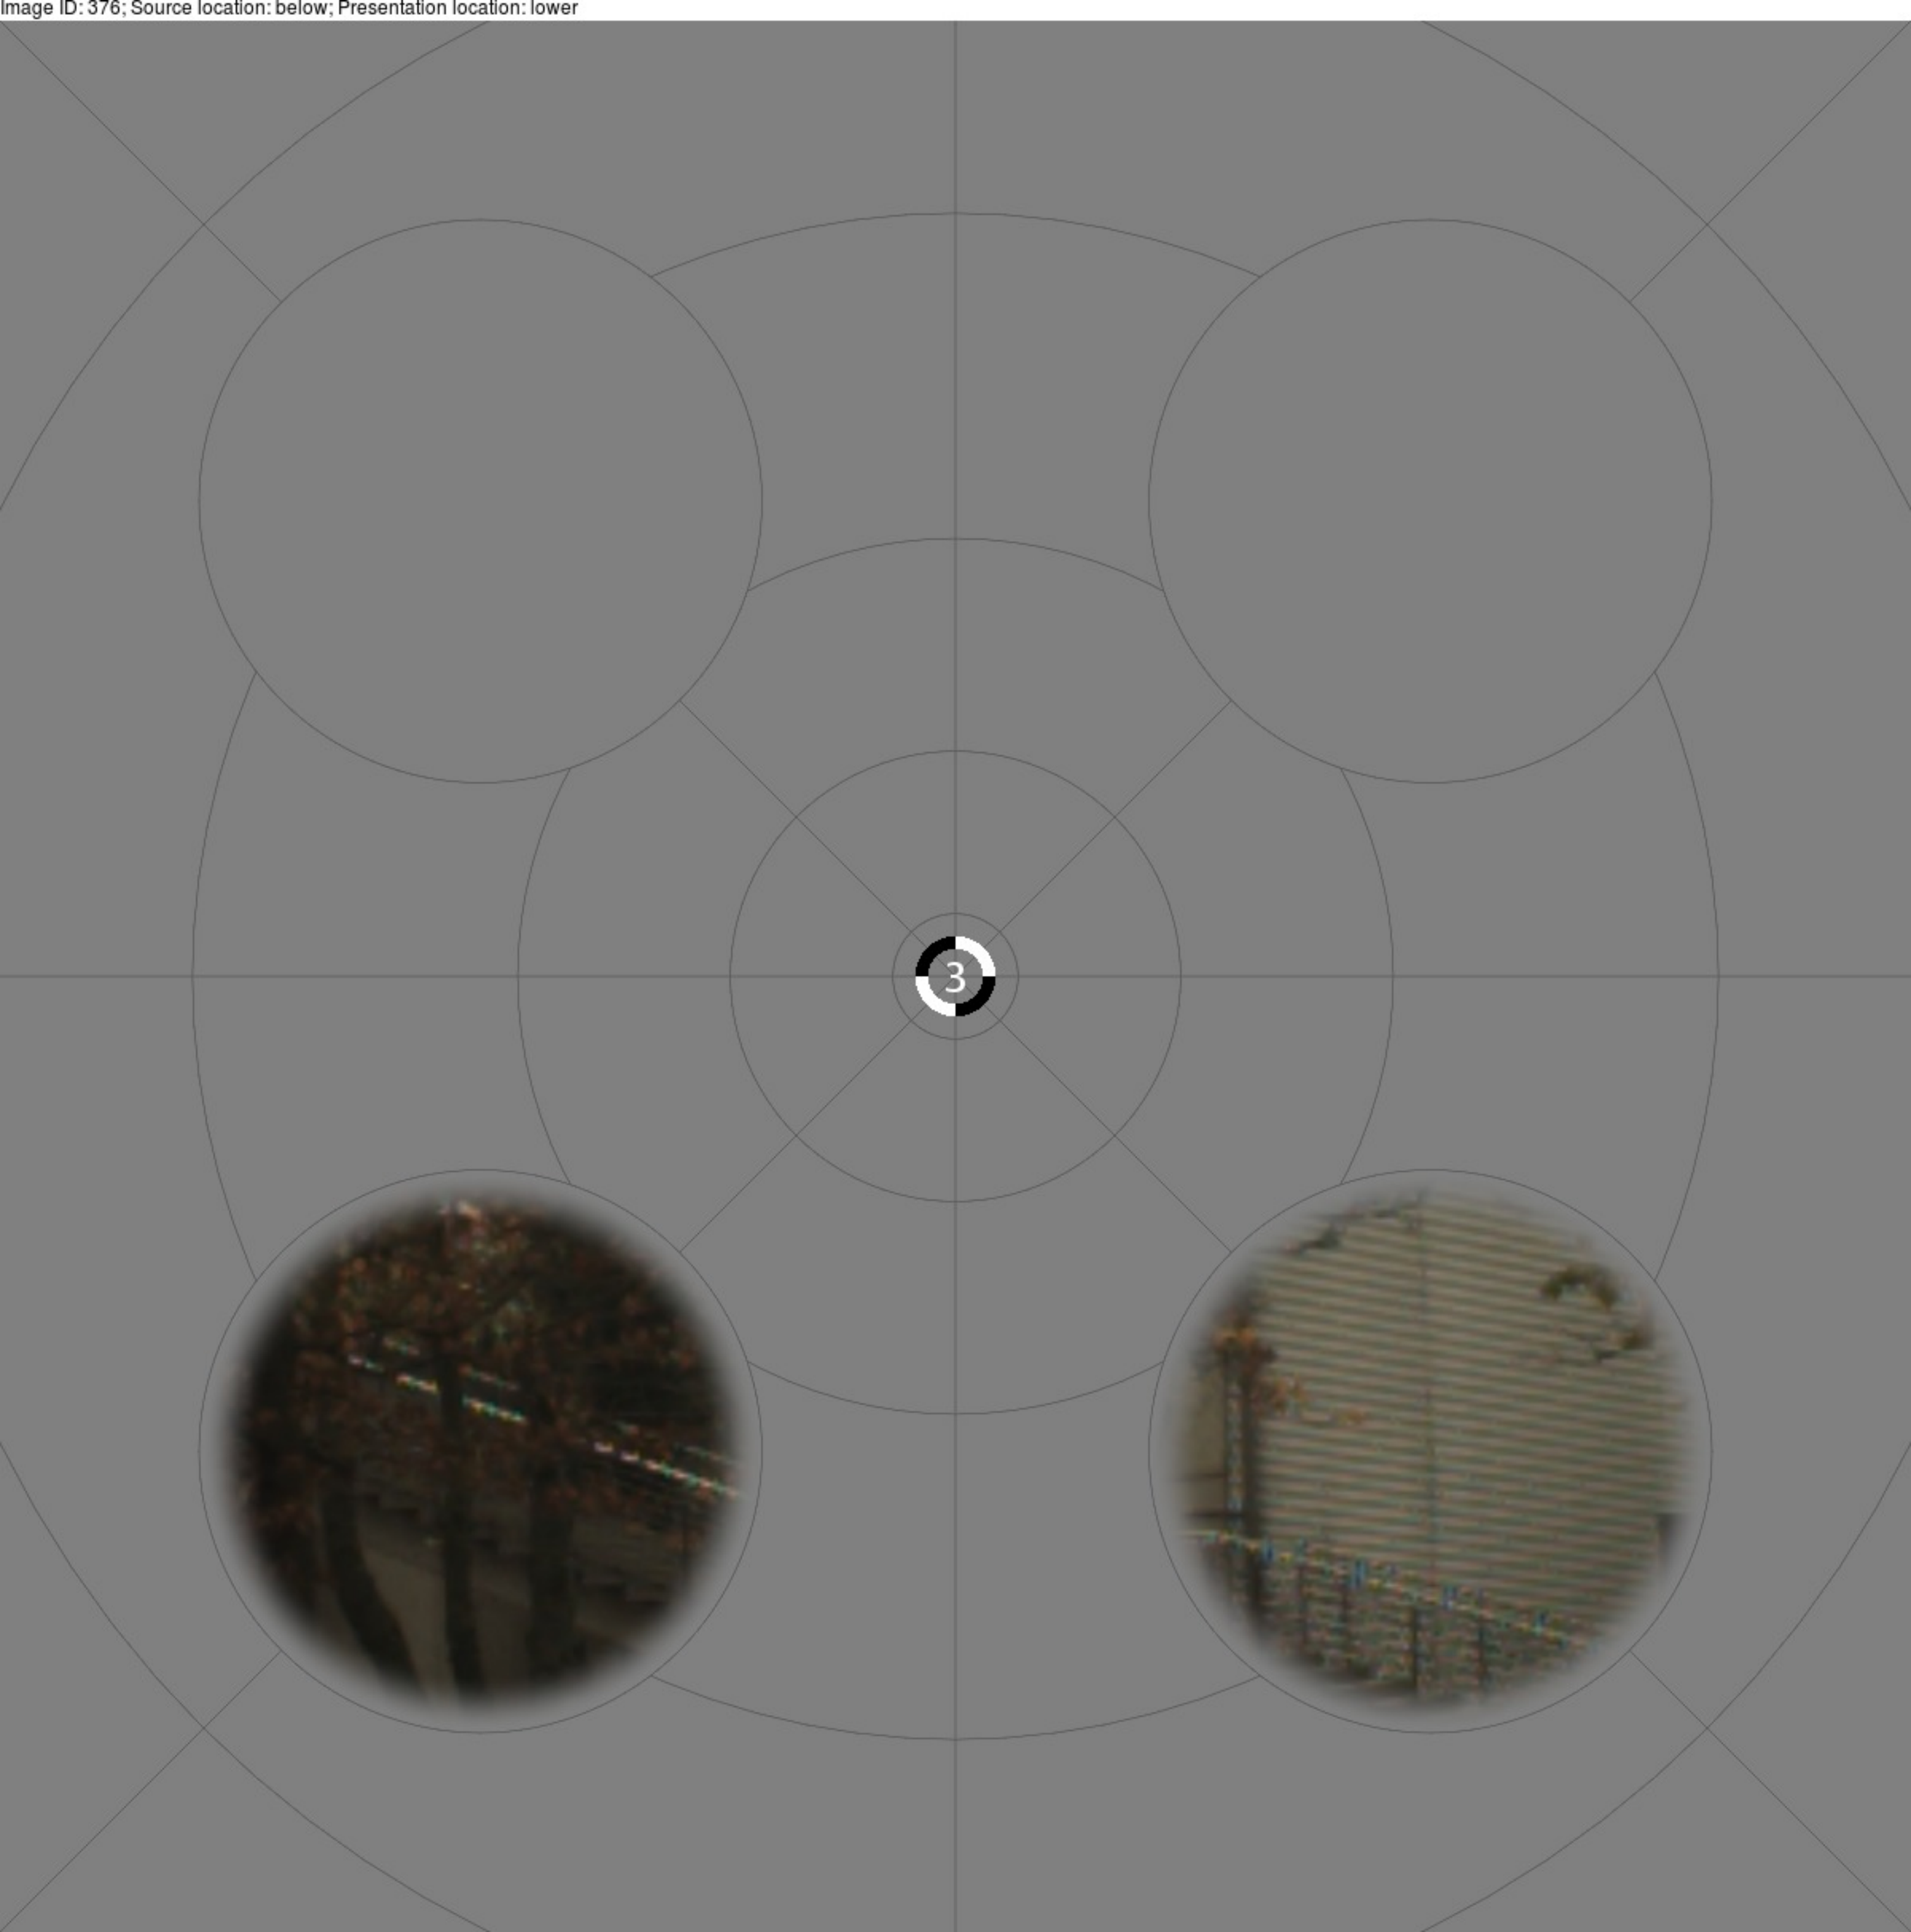

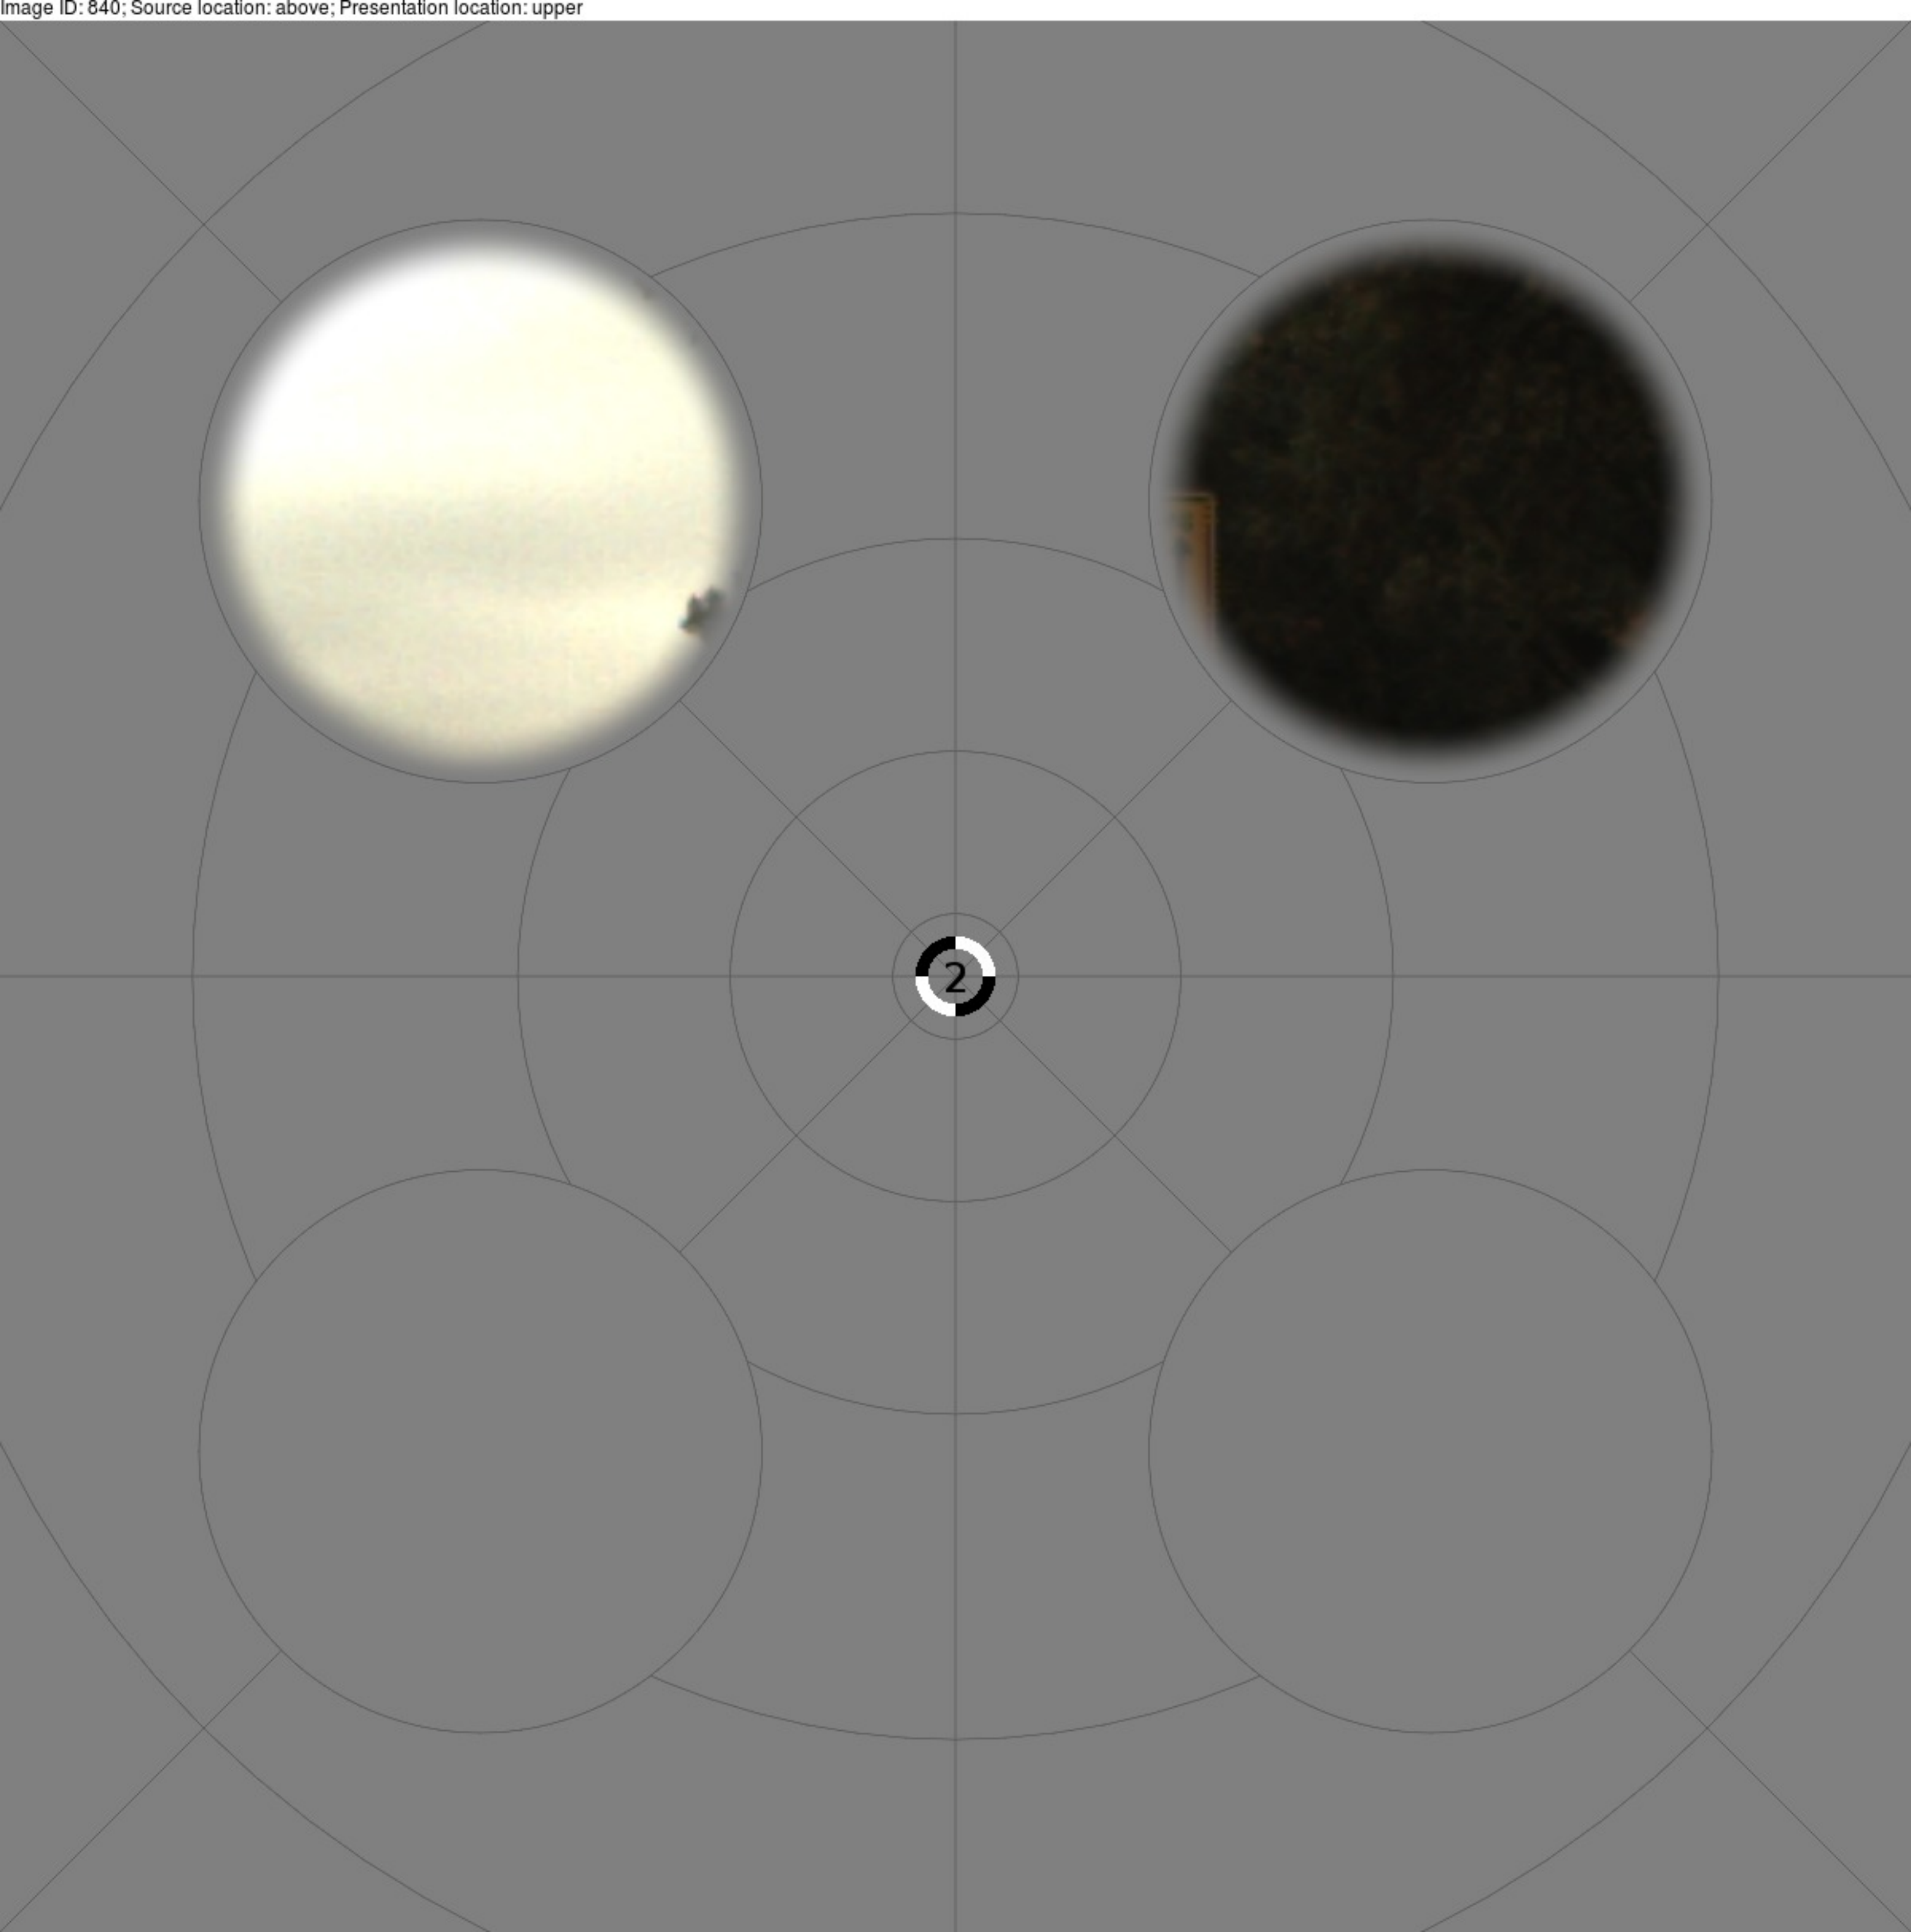

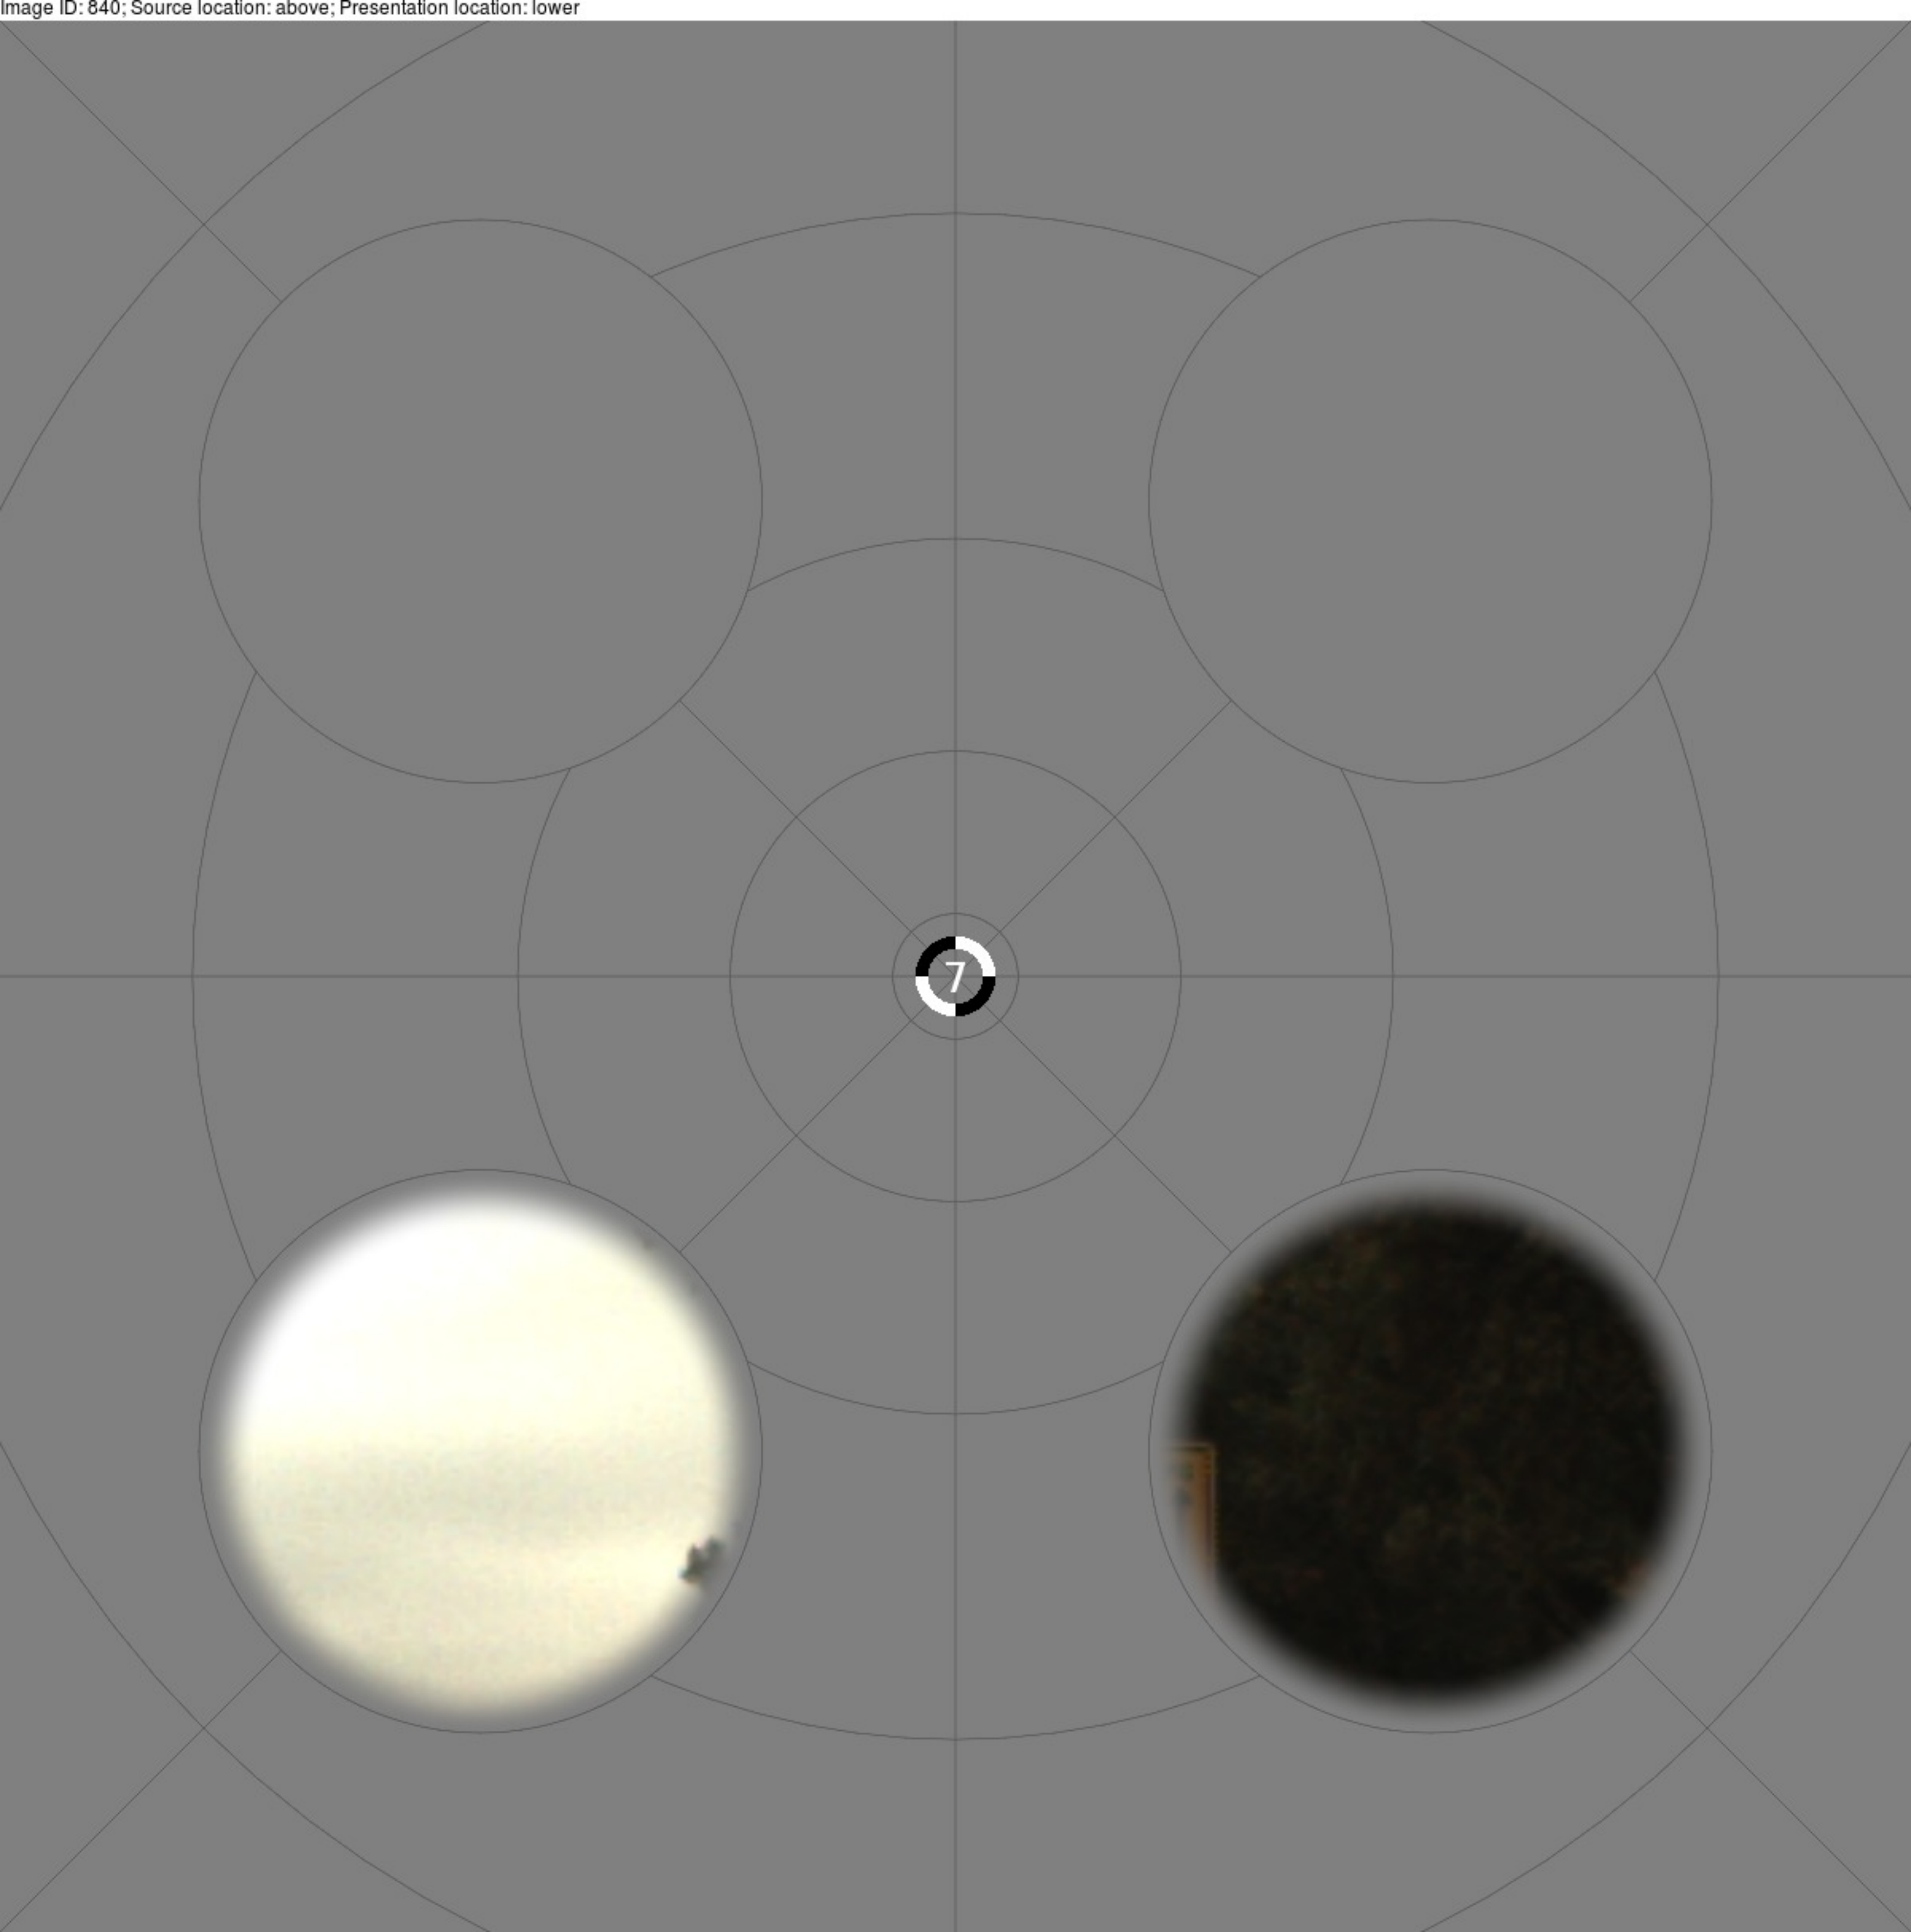



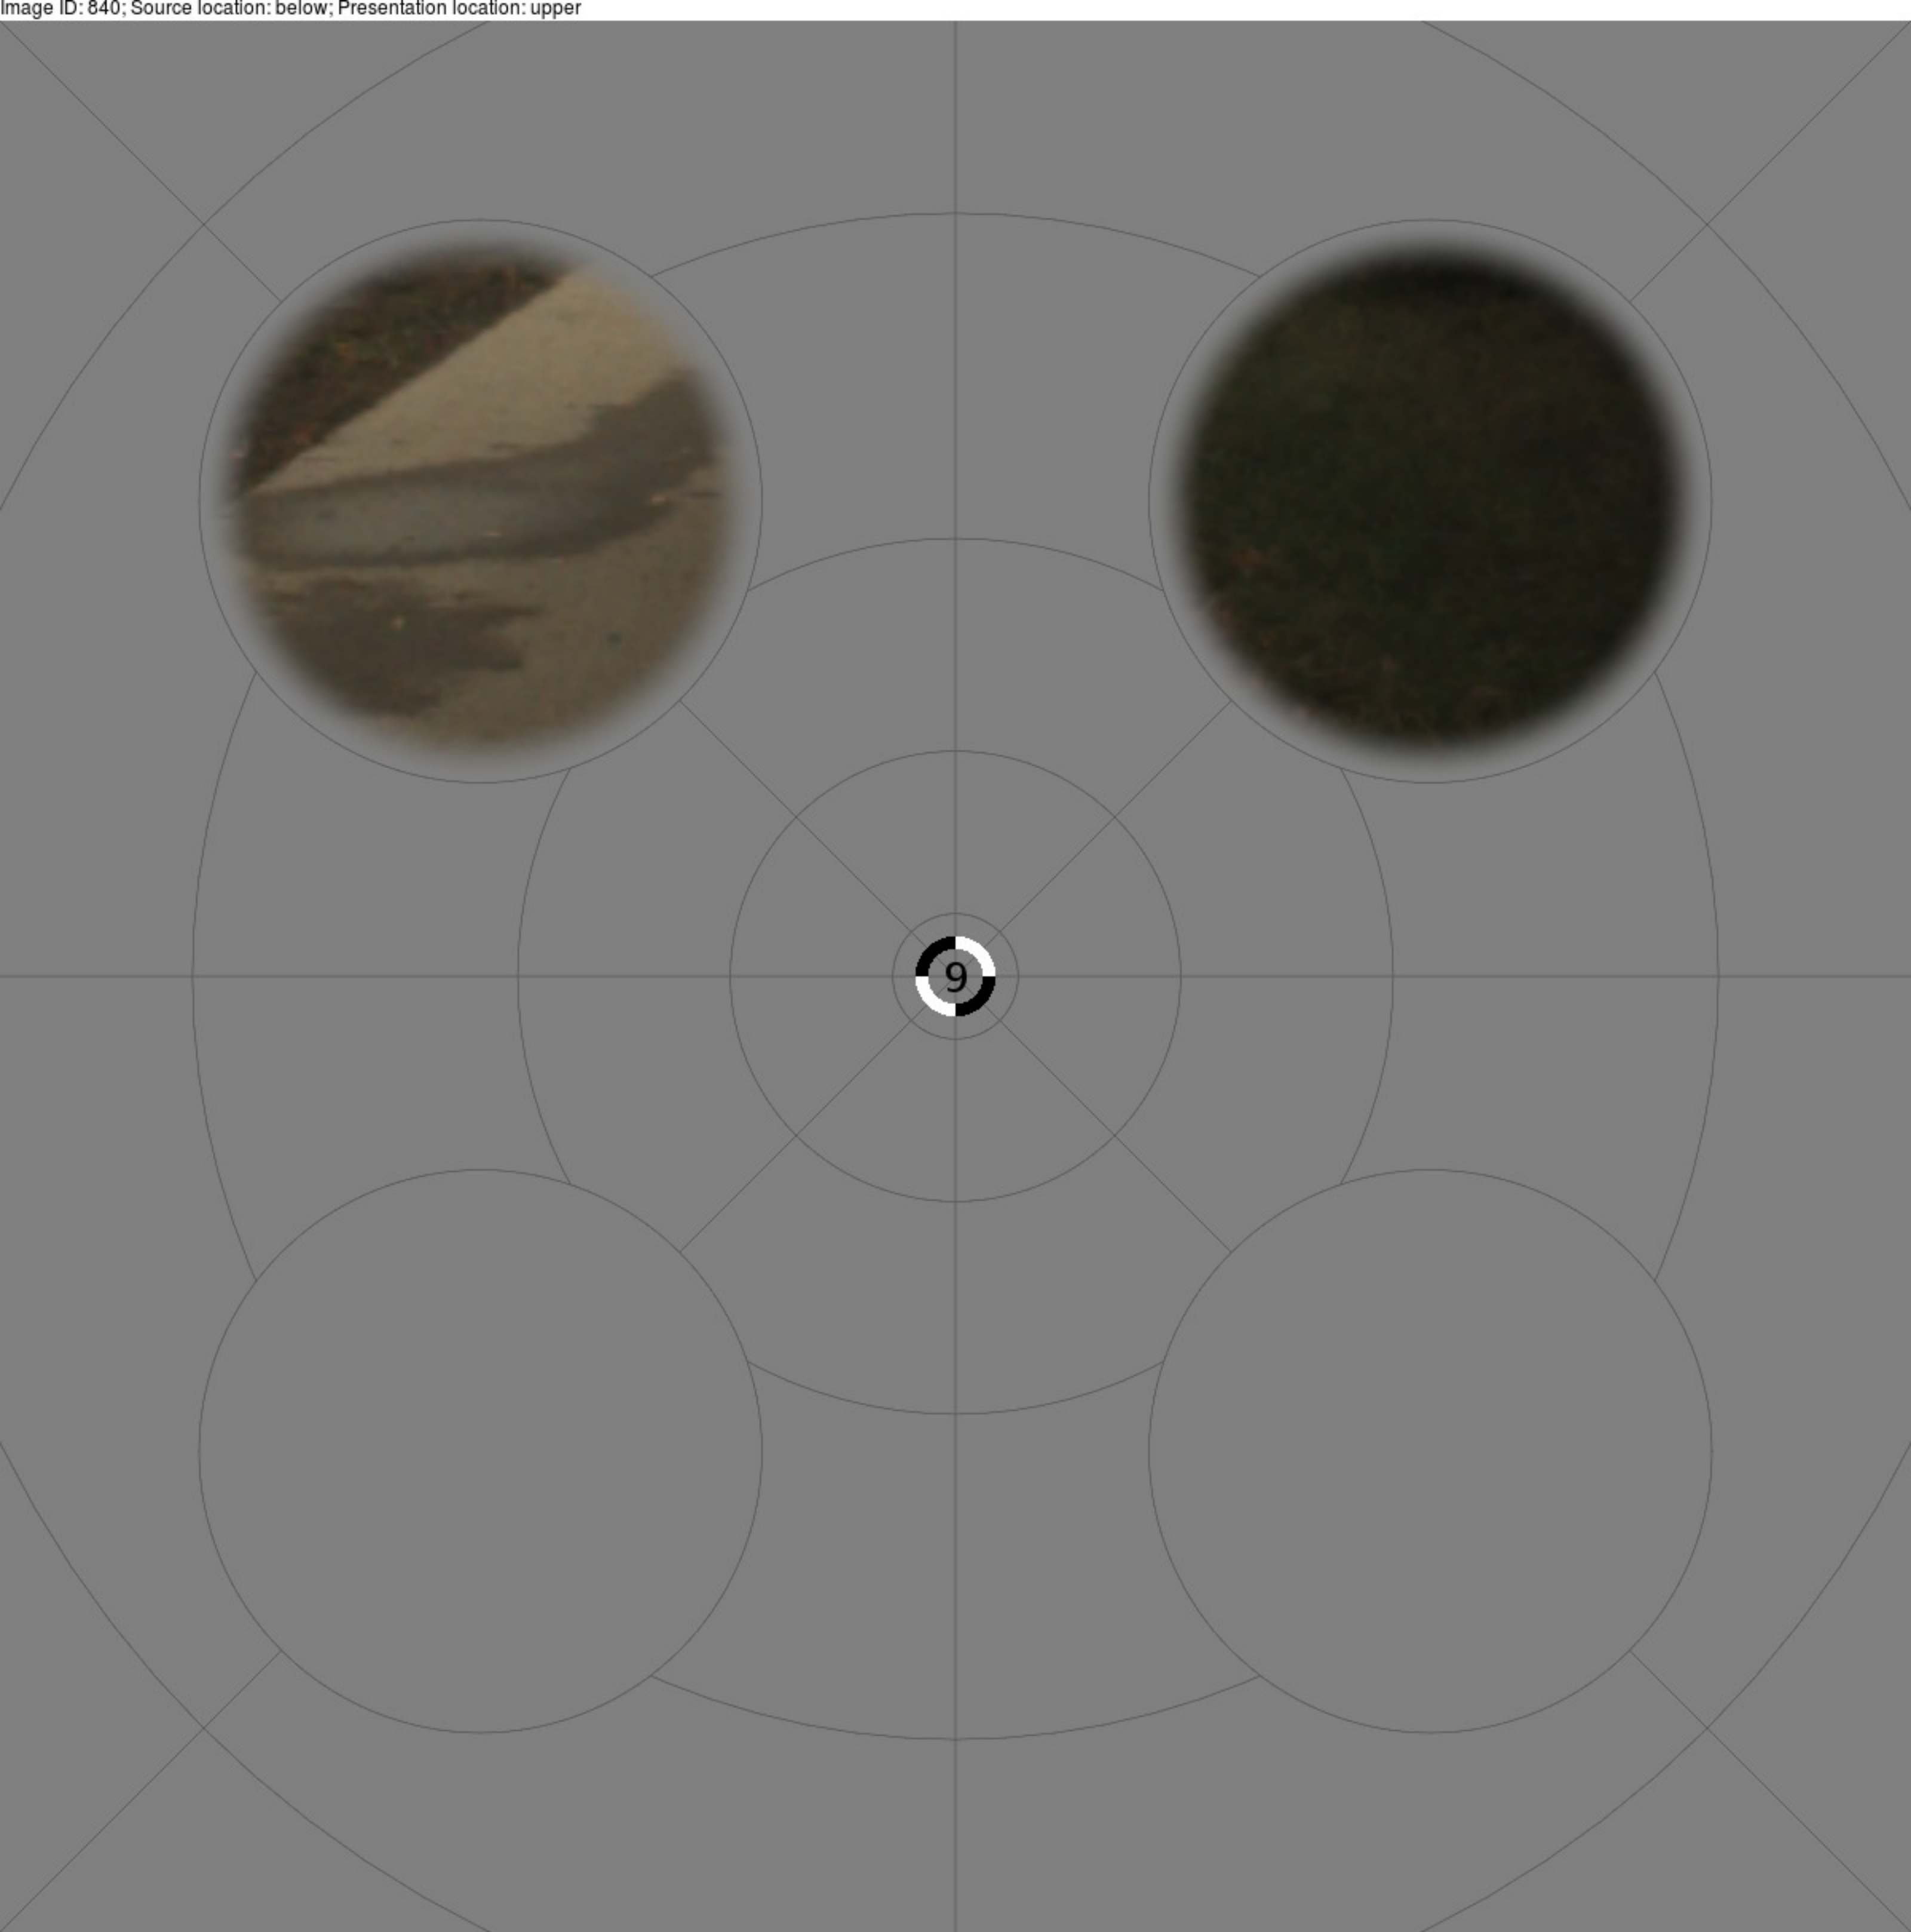

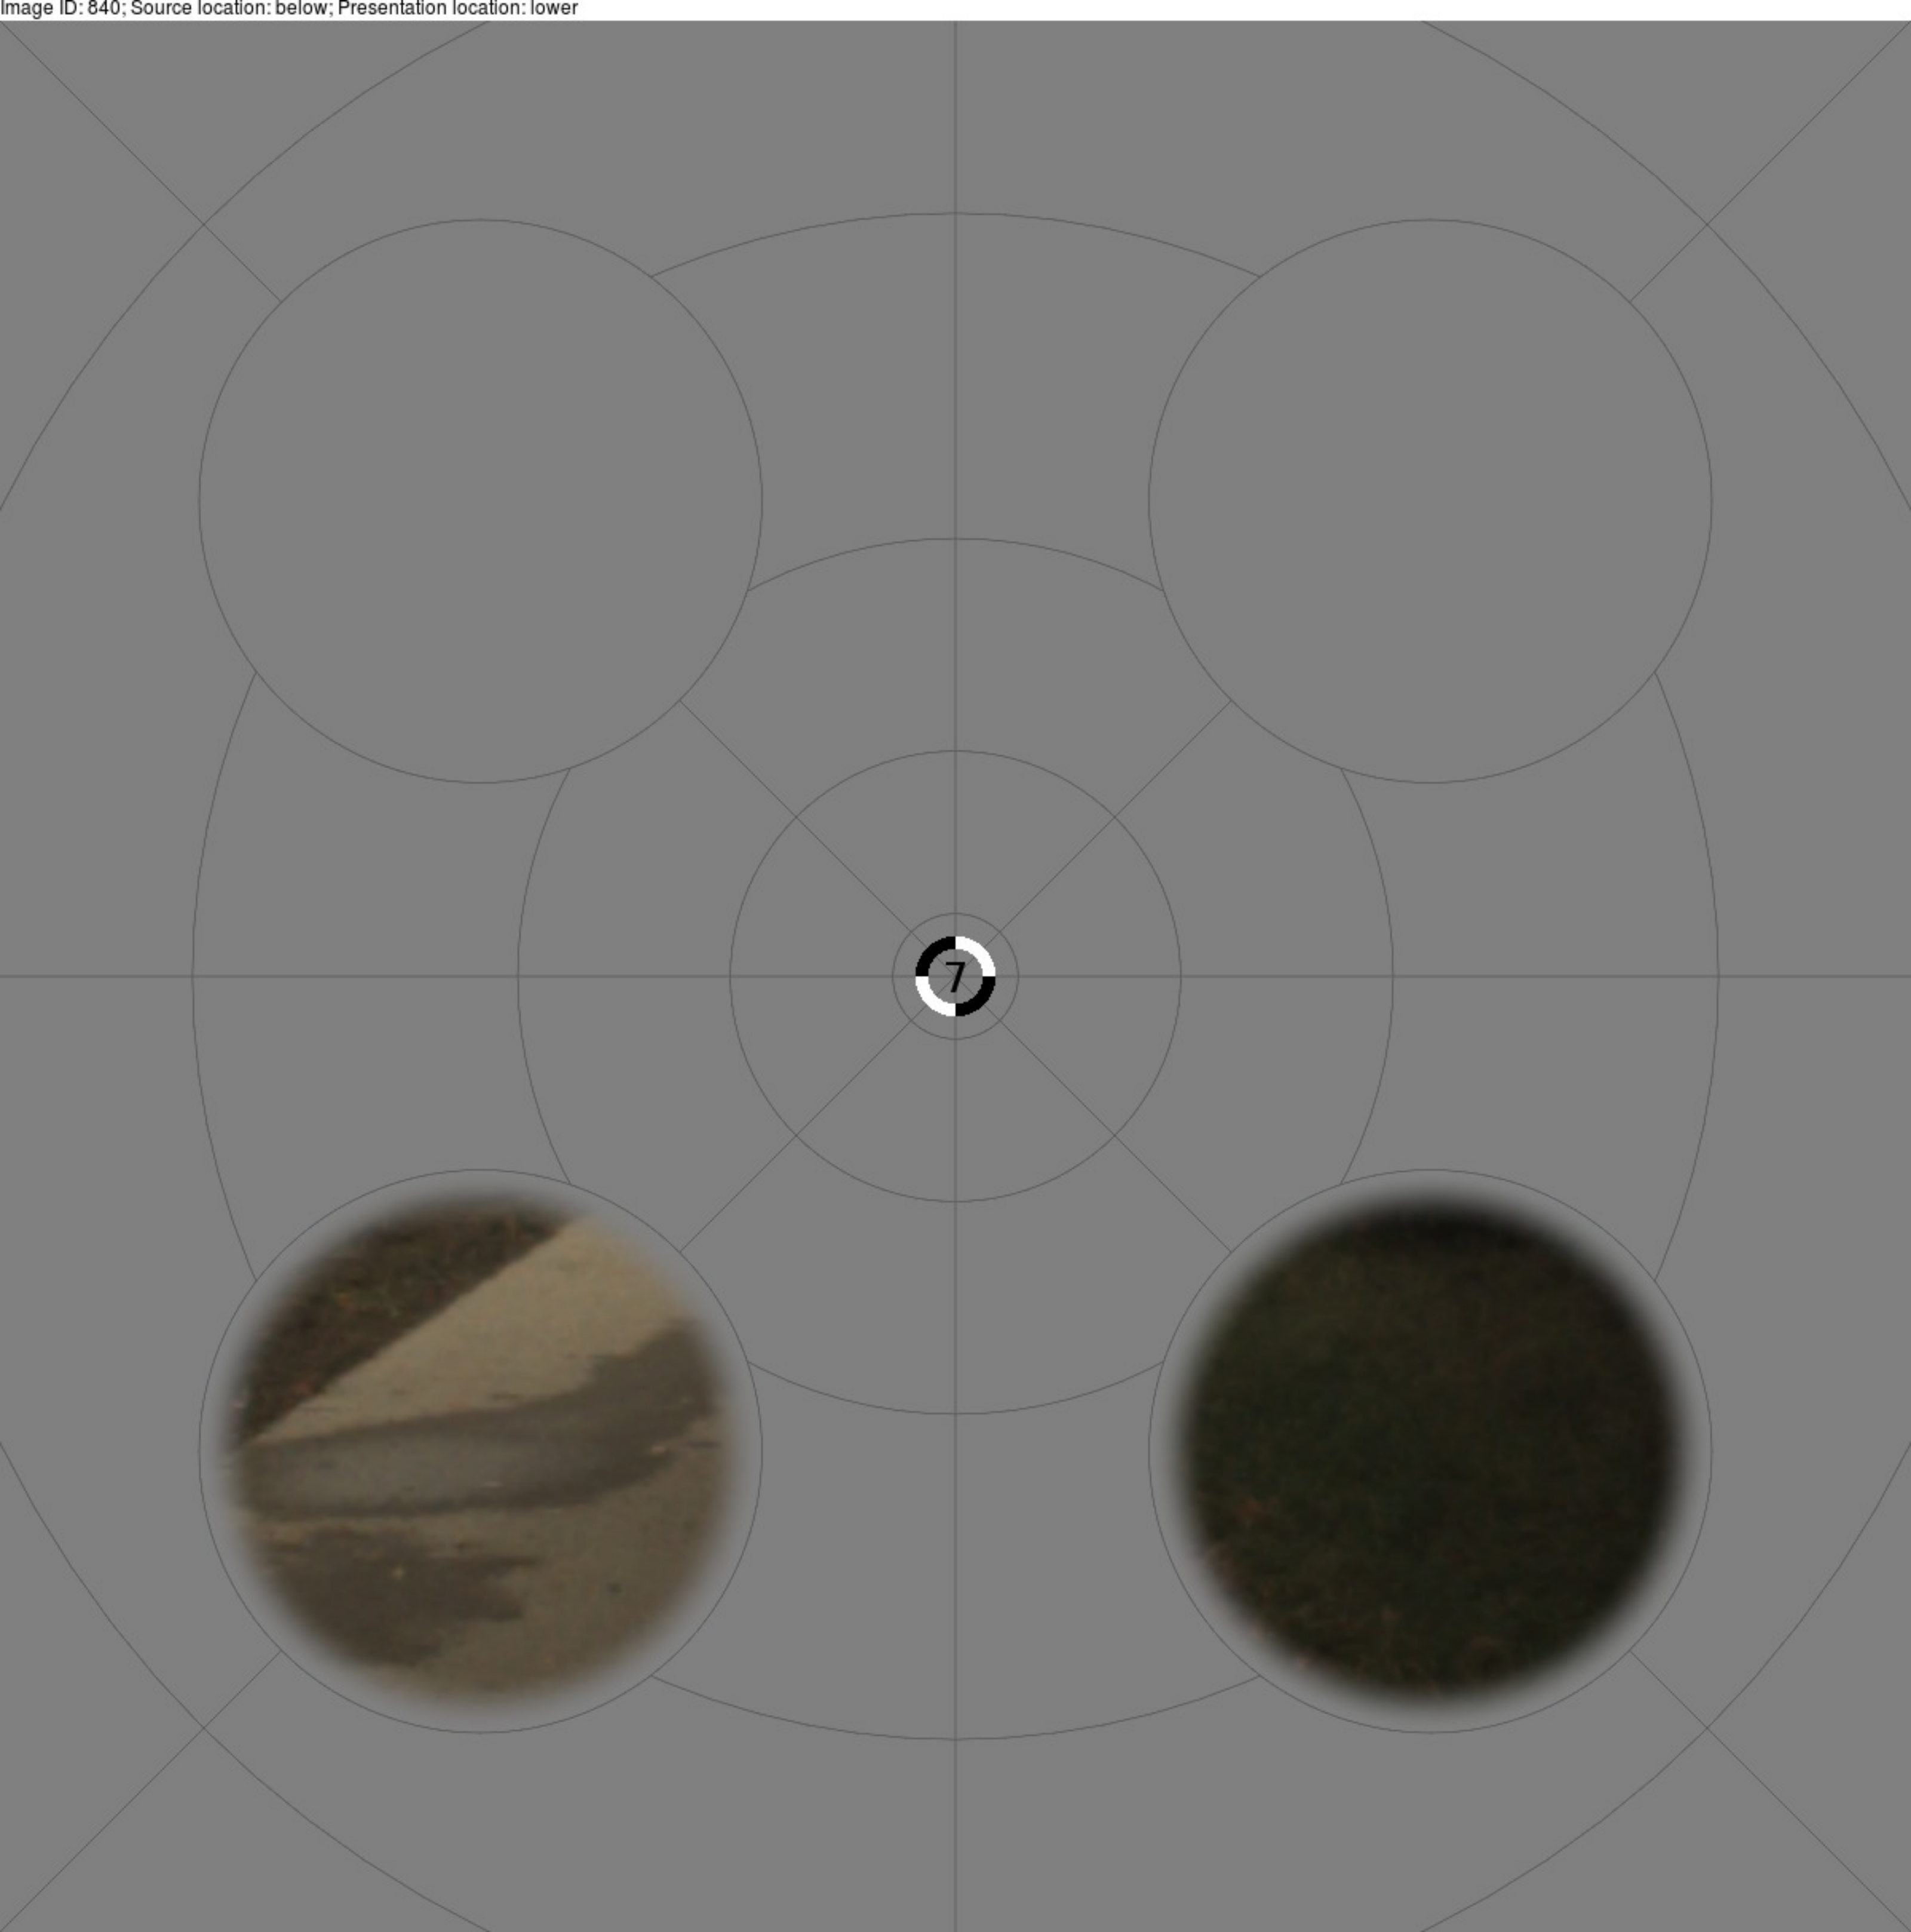

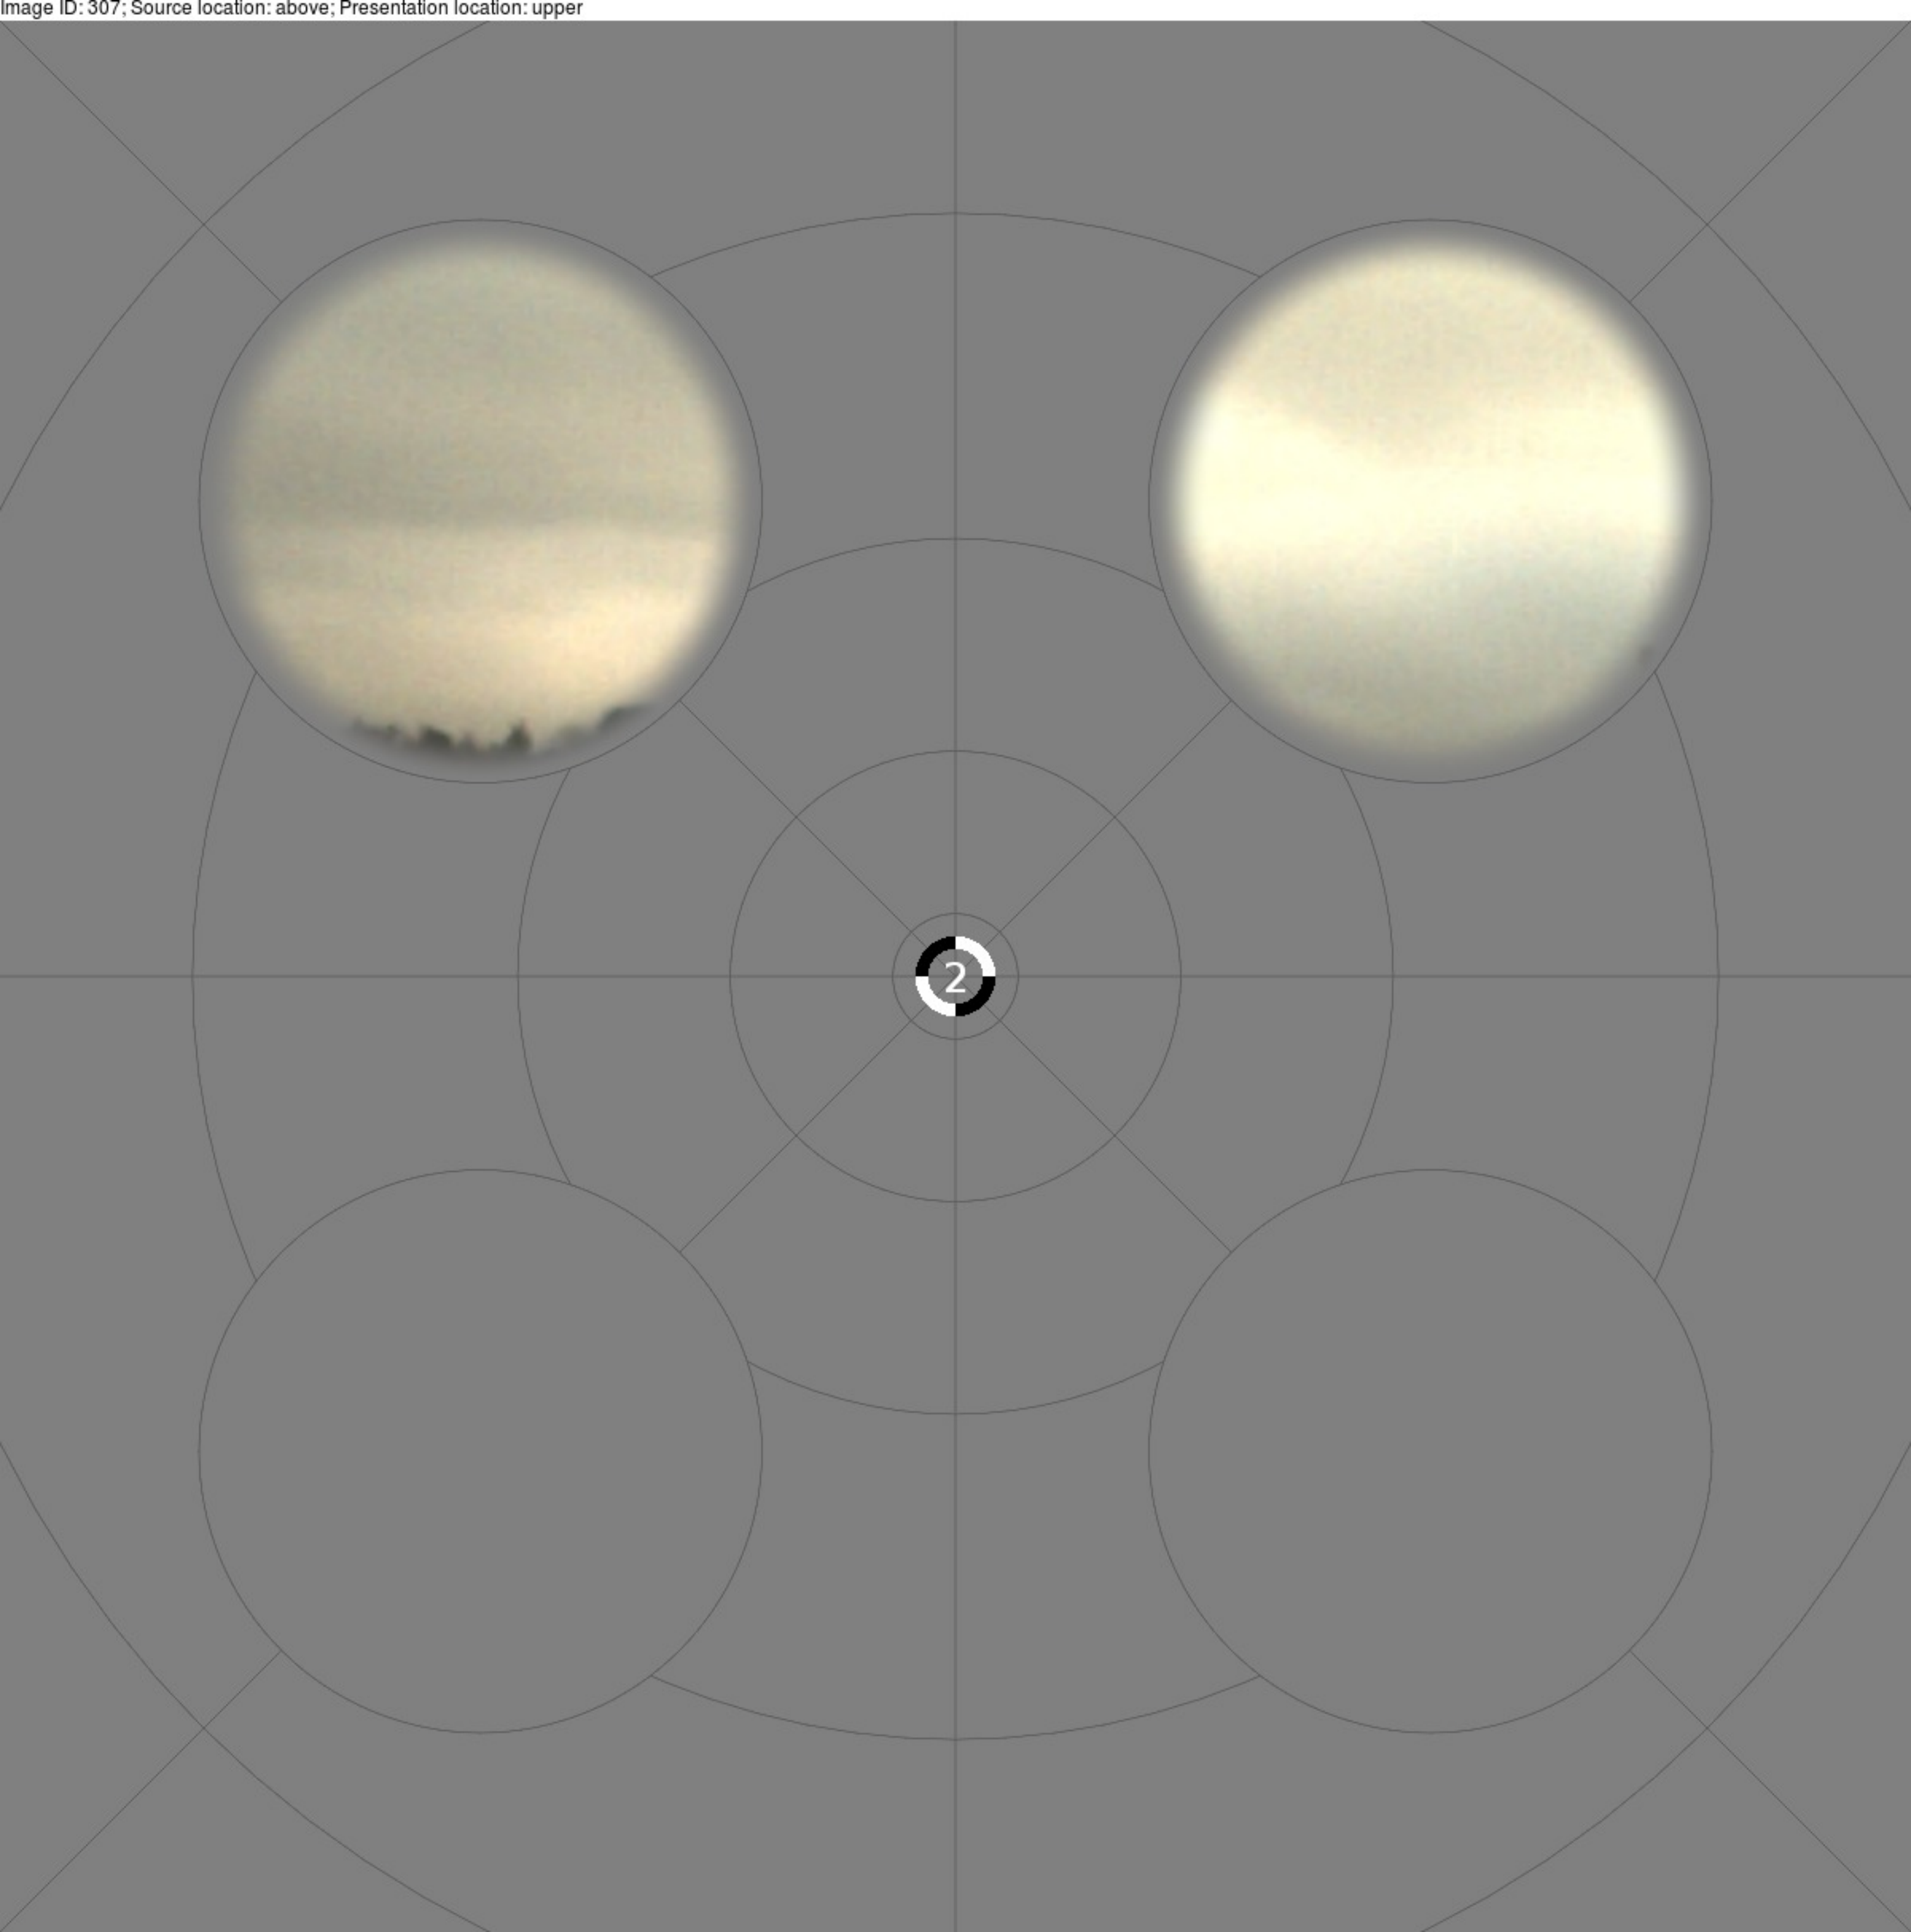



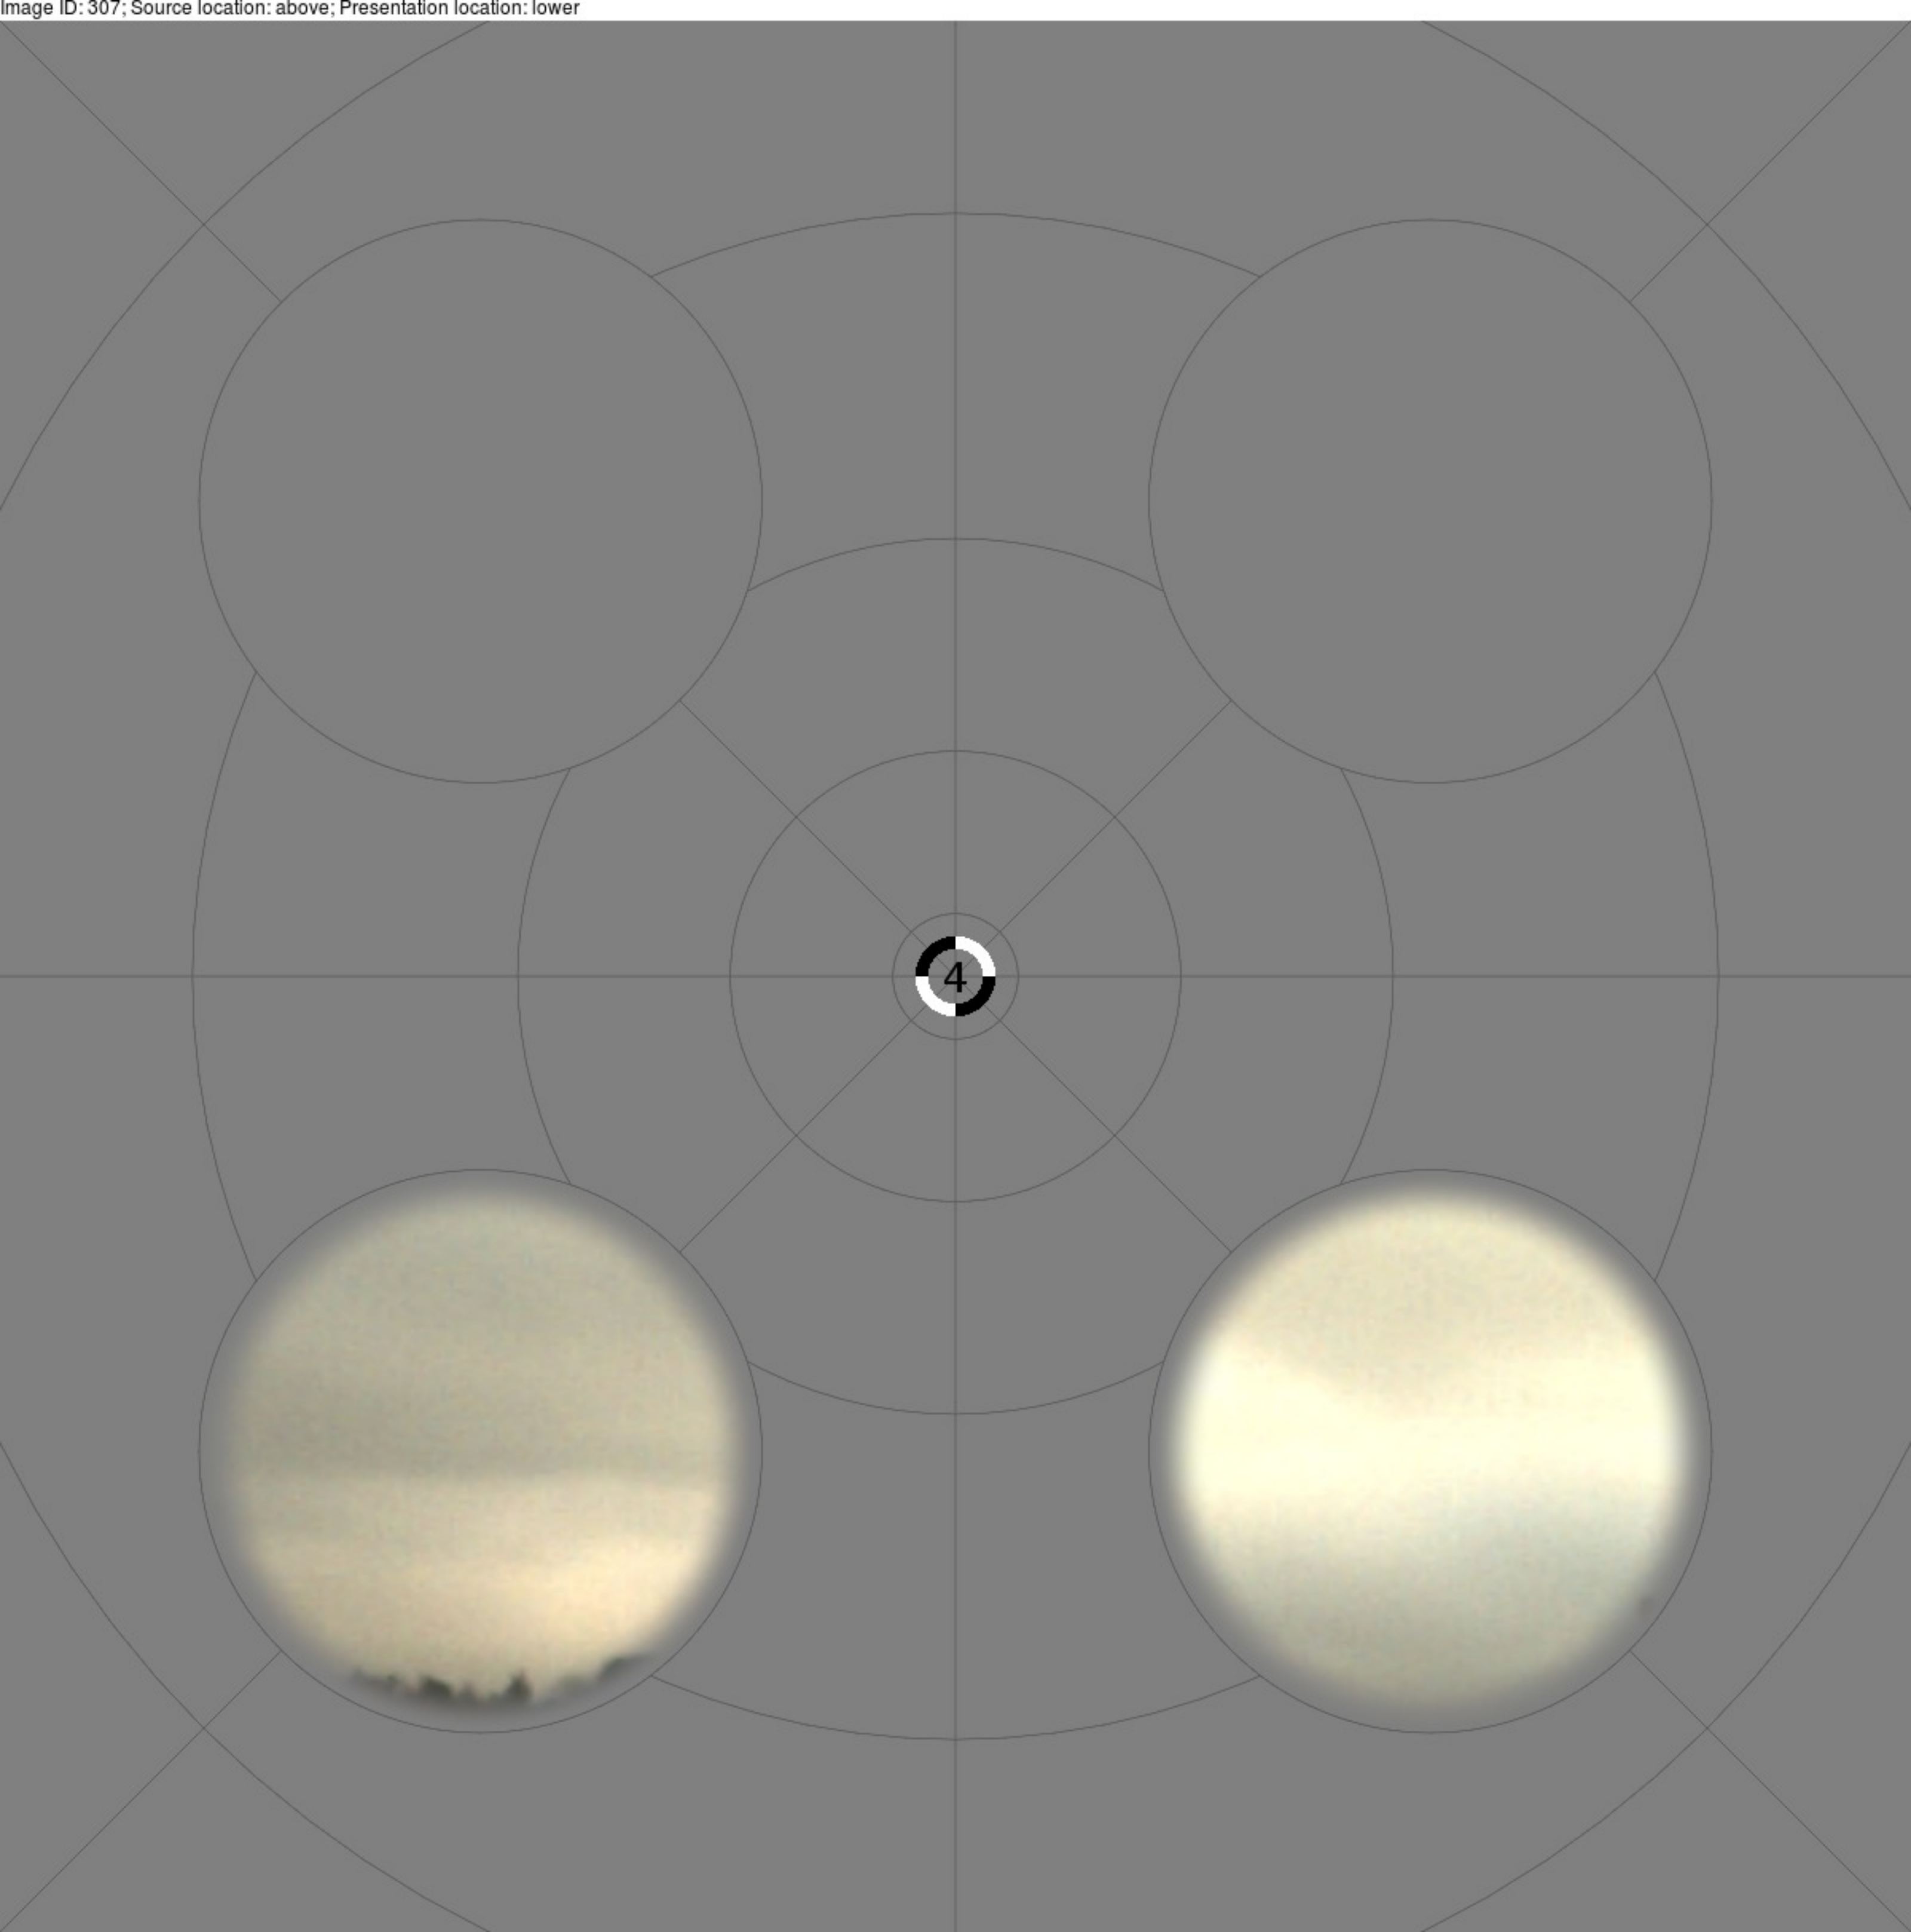

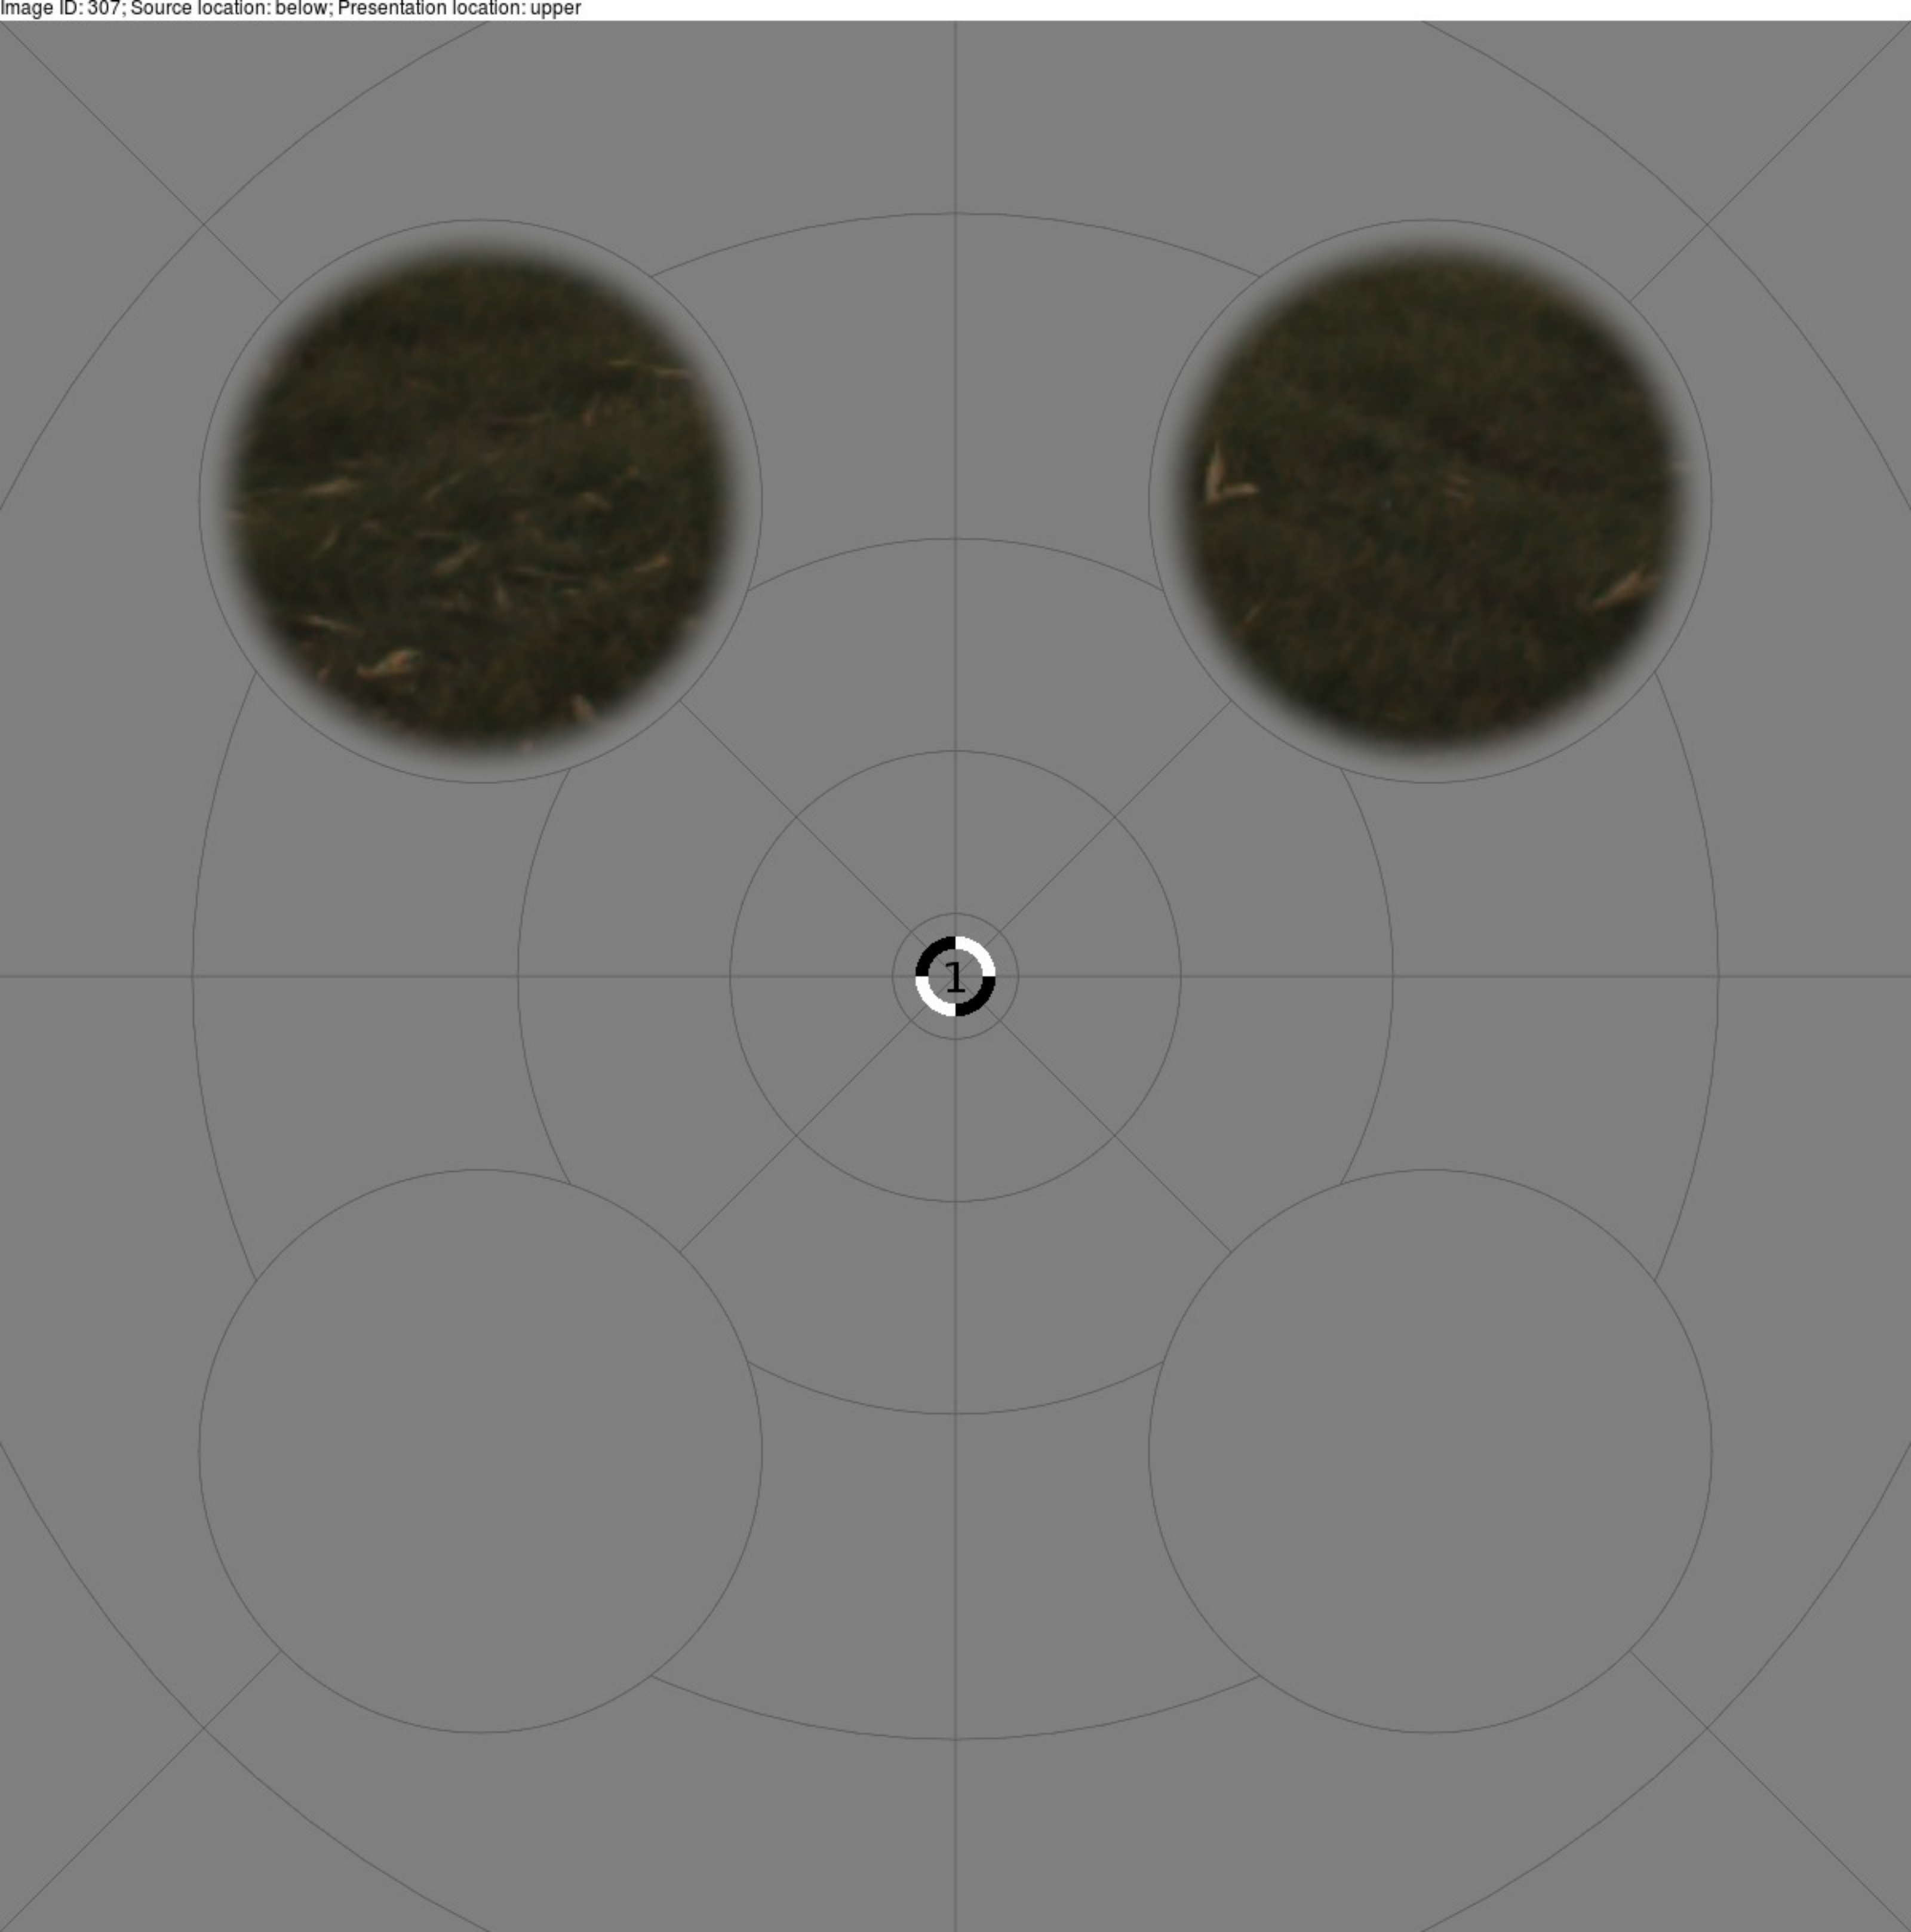

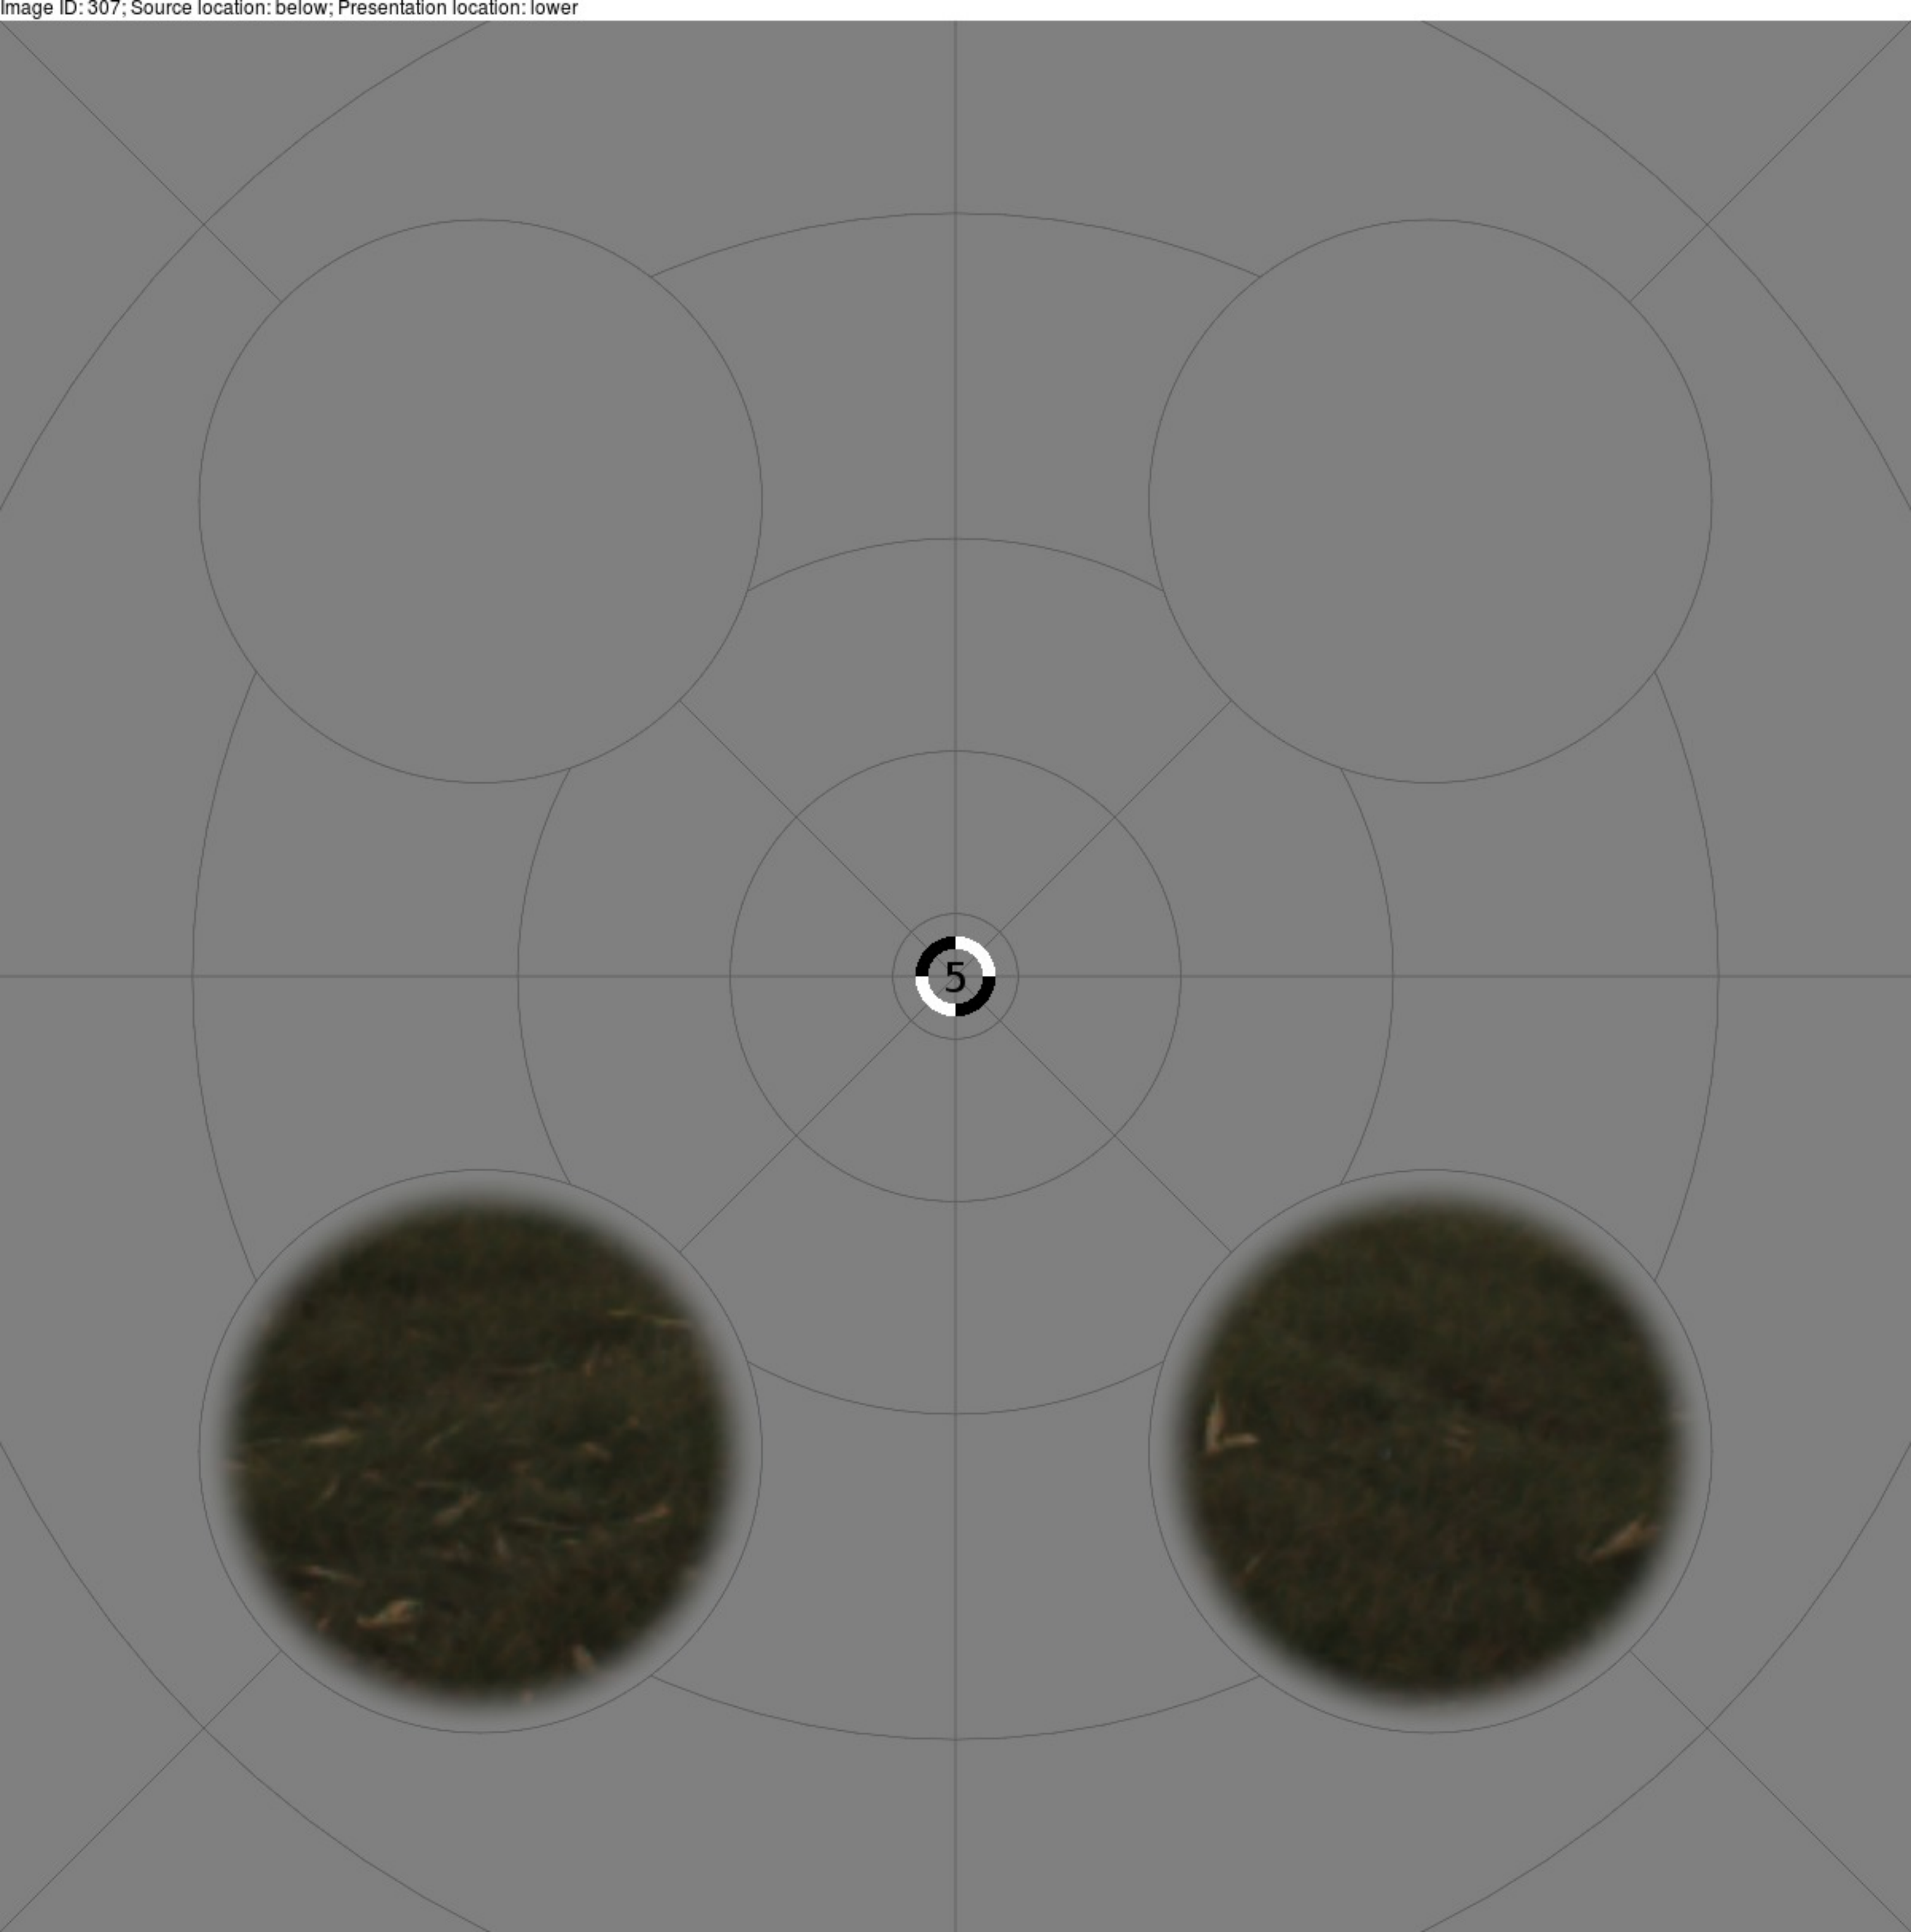



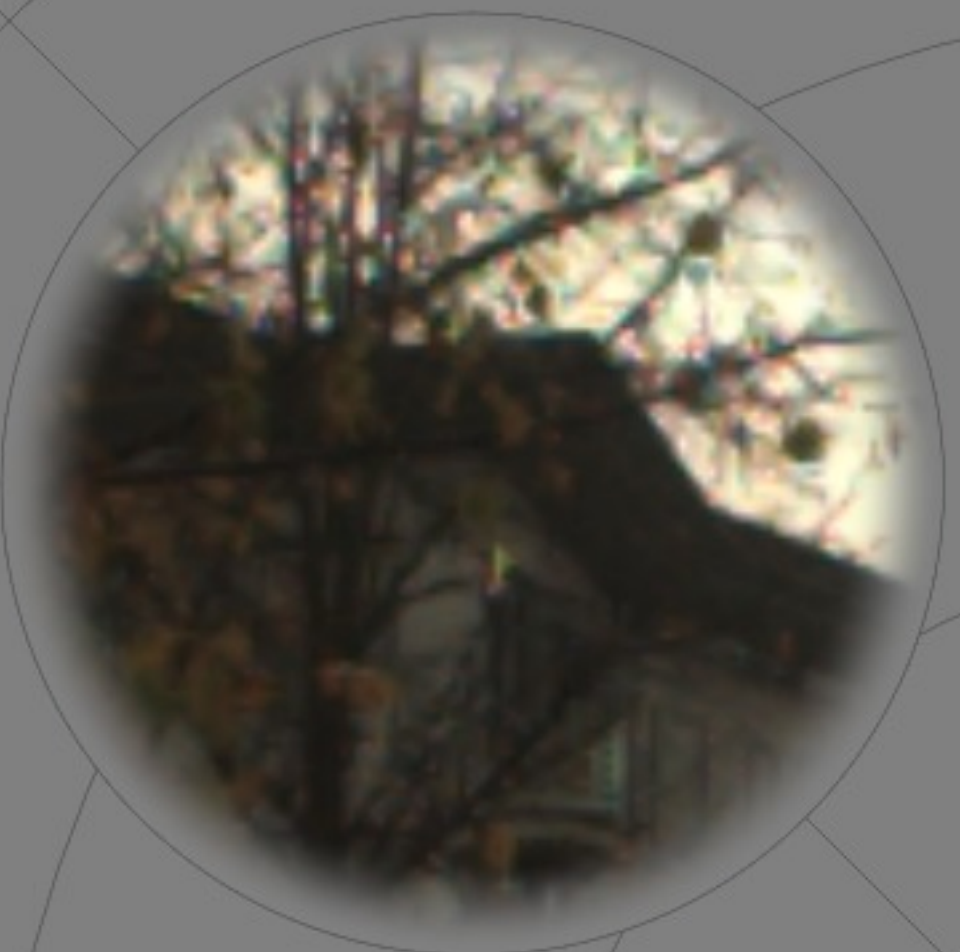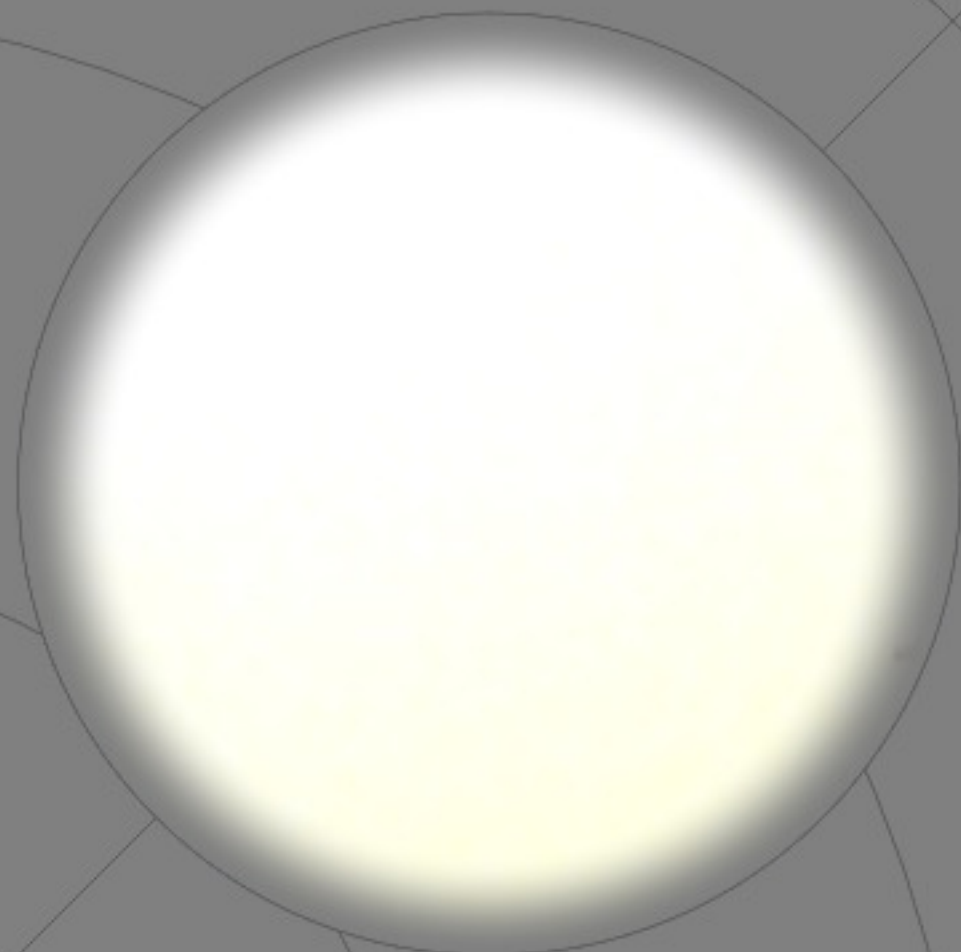

7

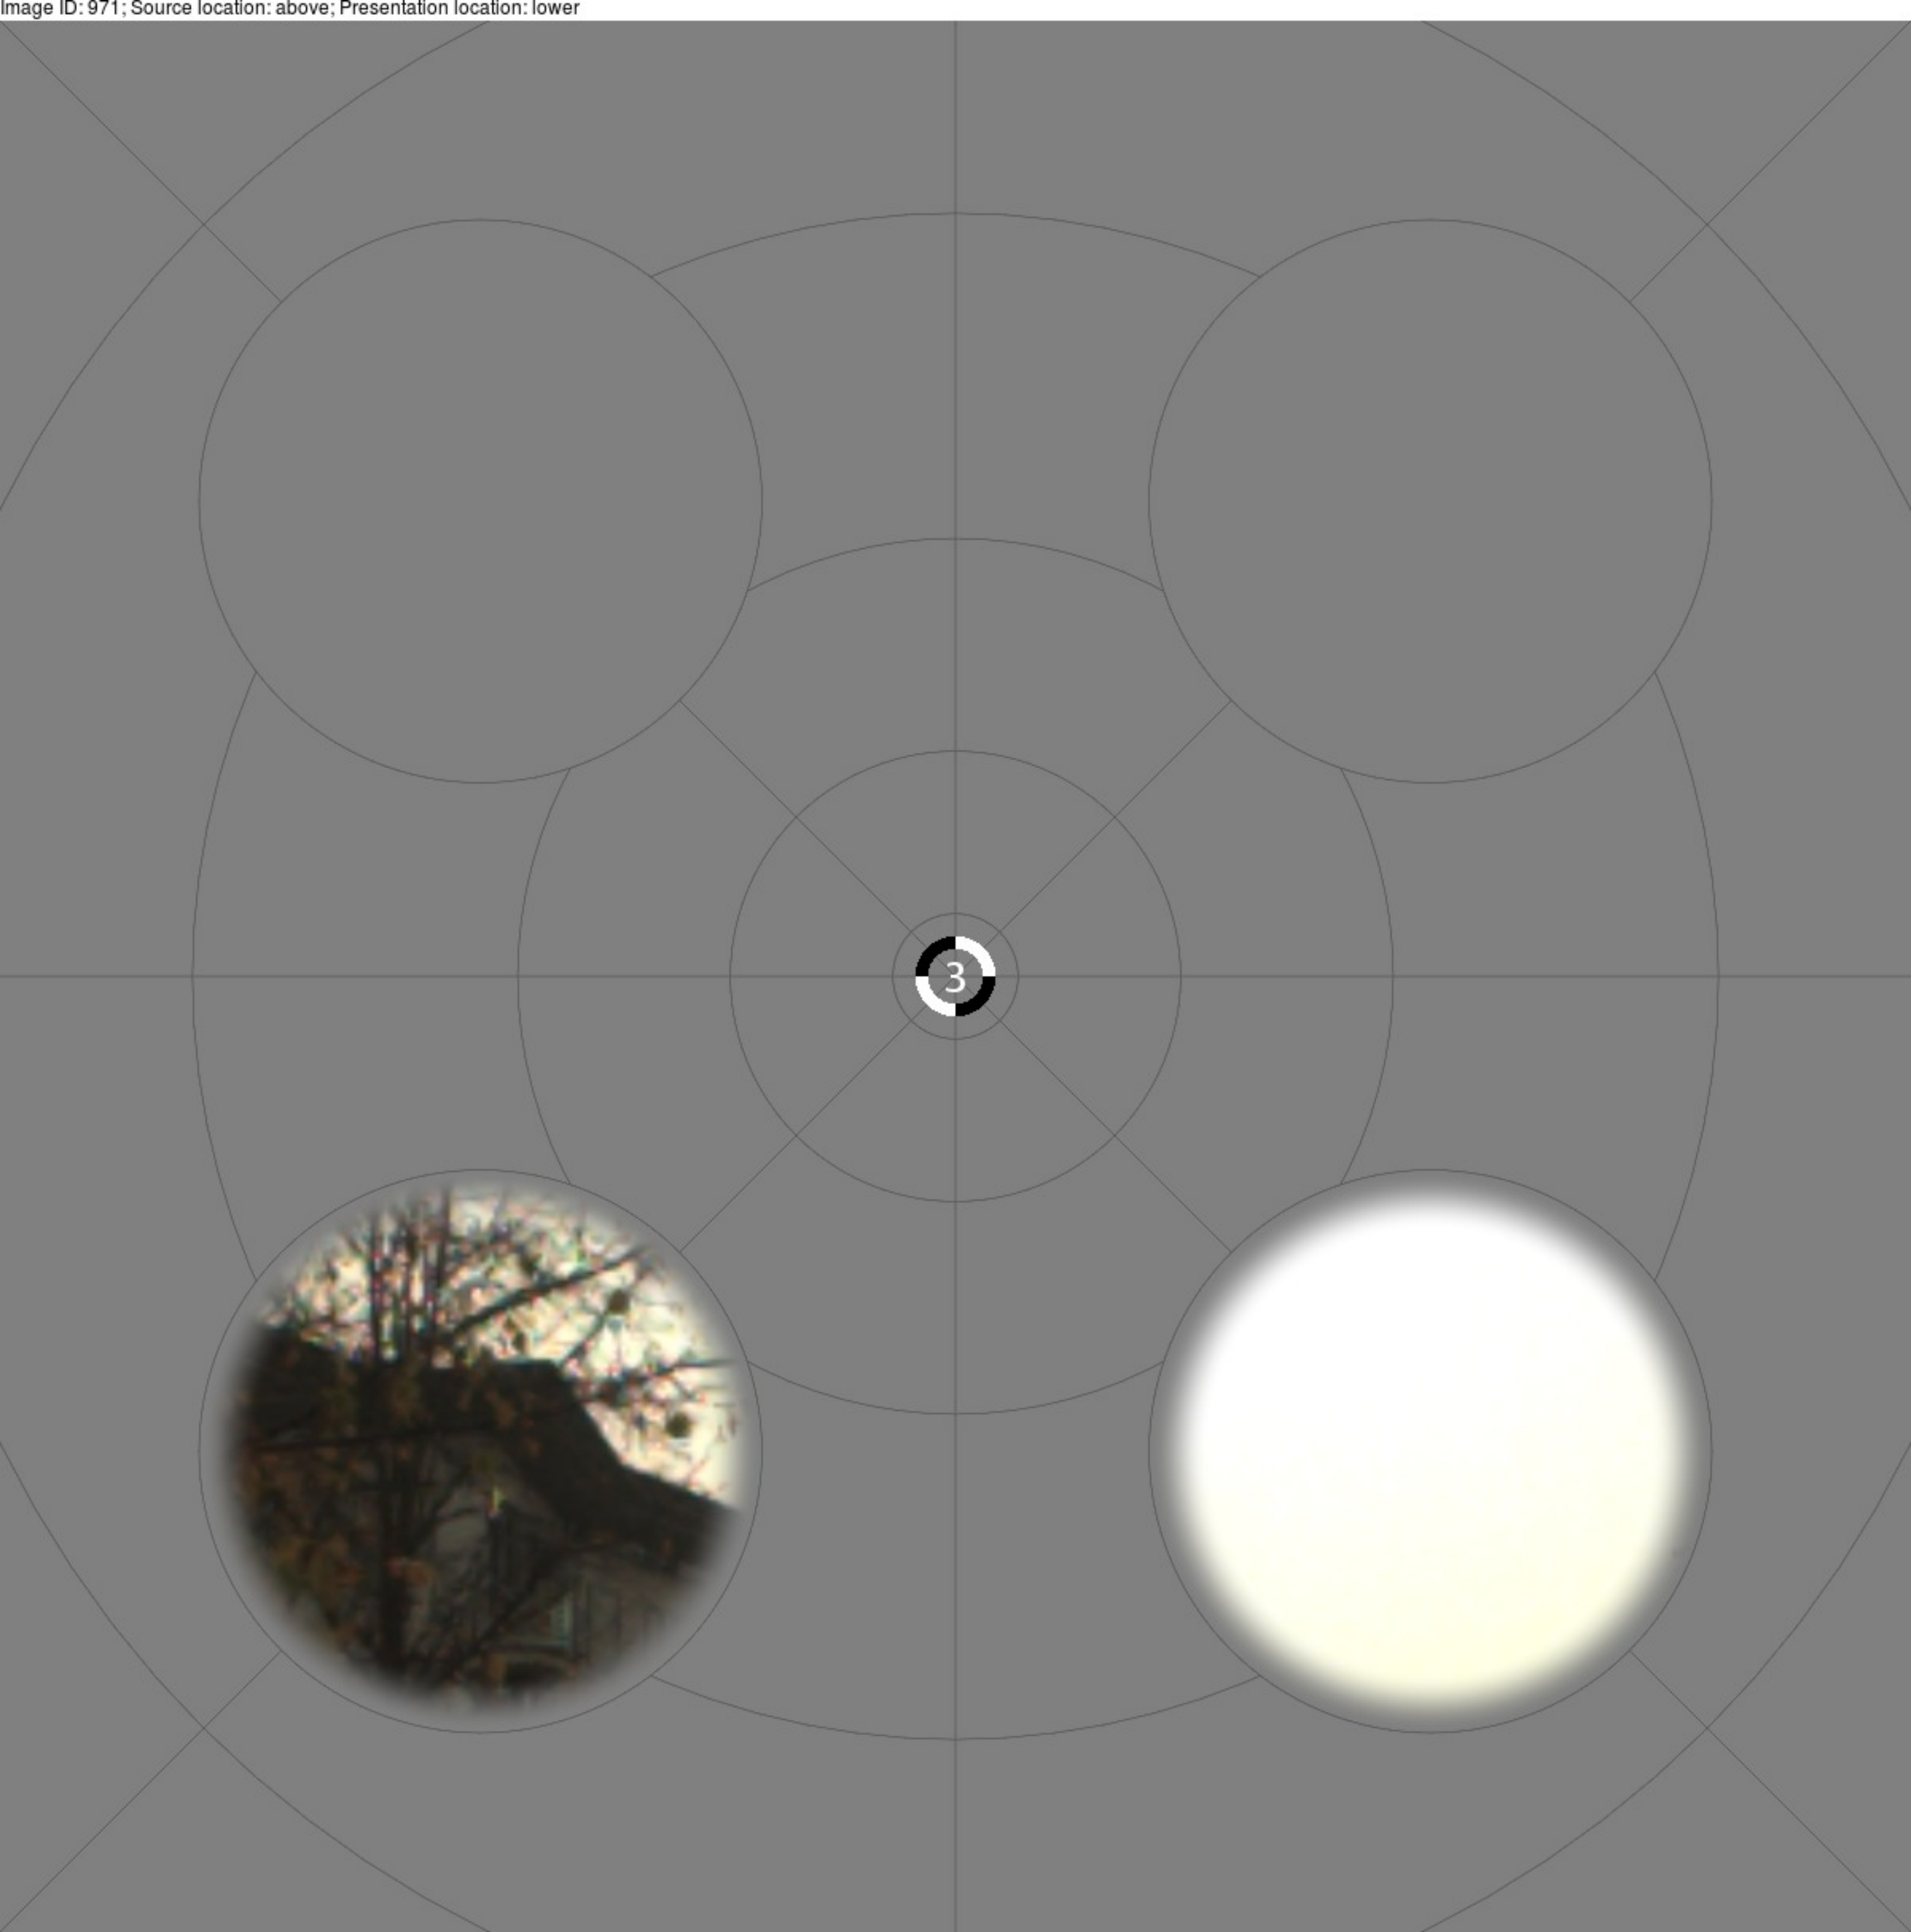

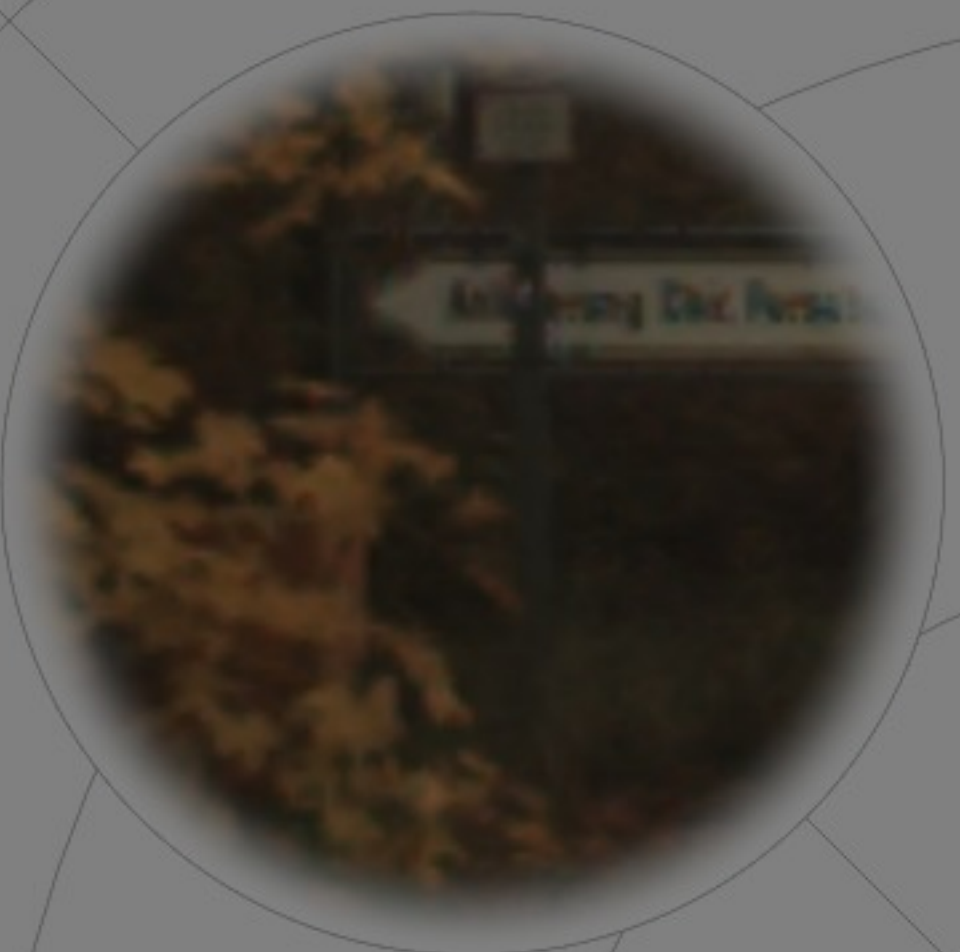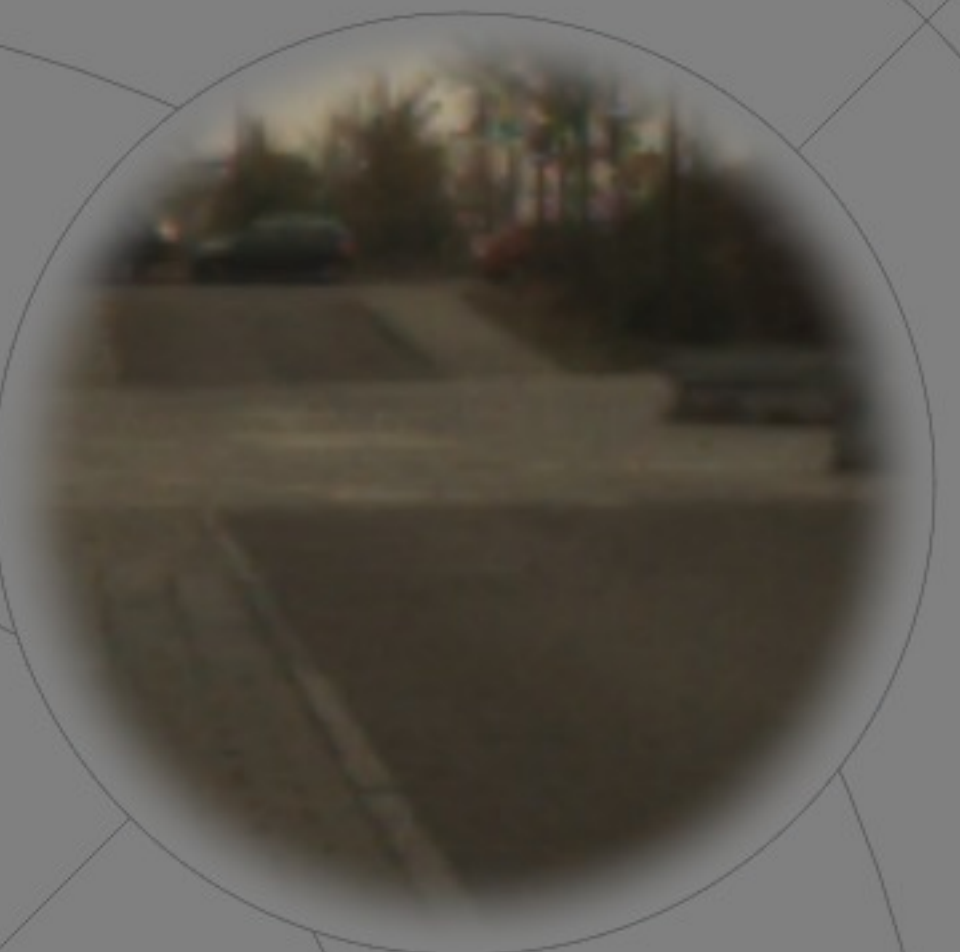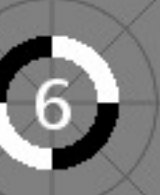



8

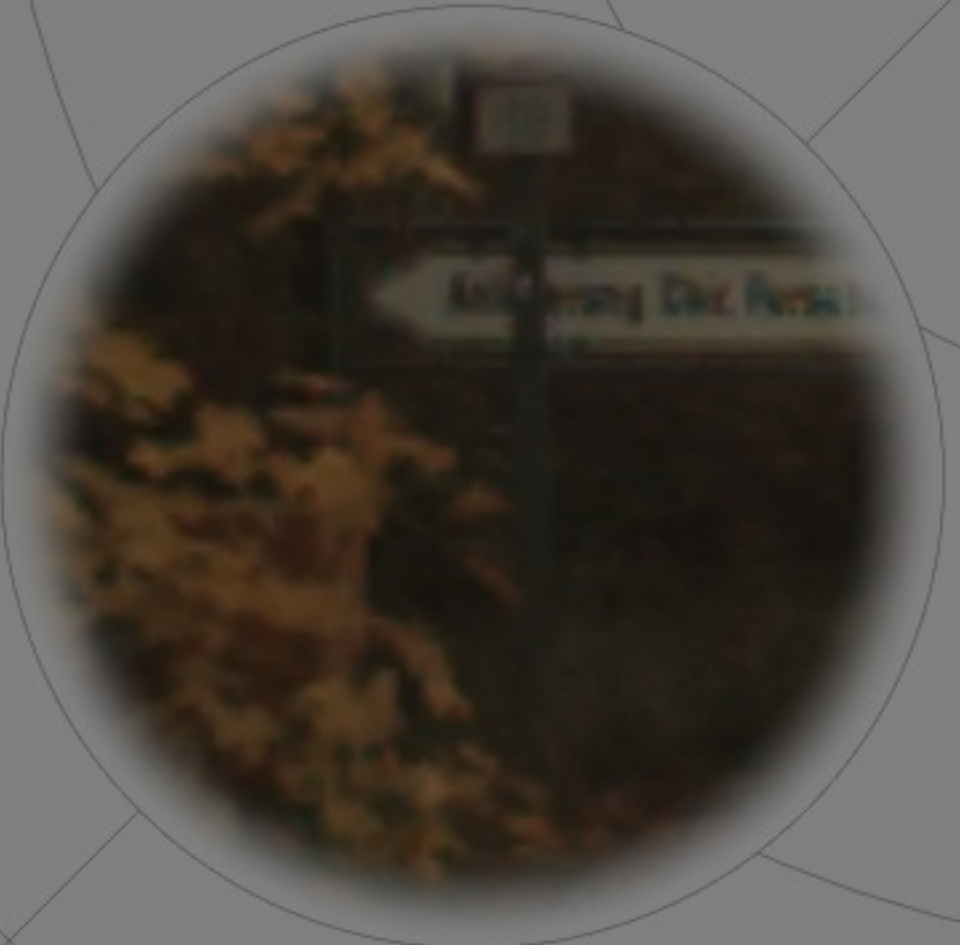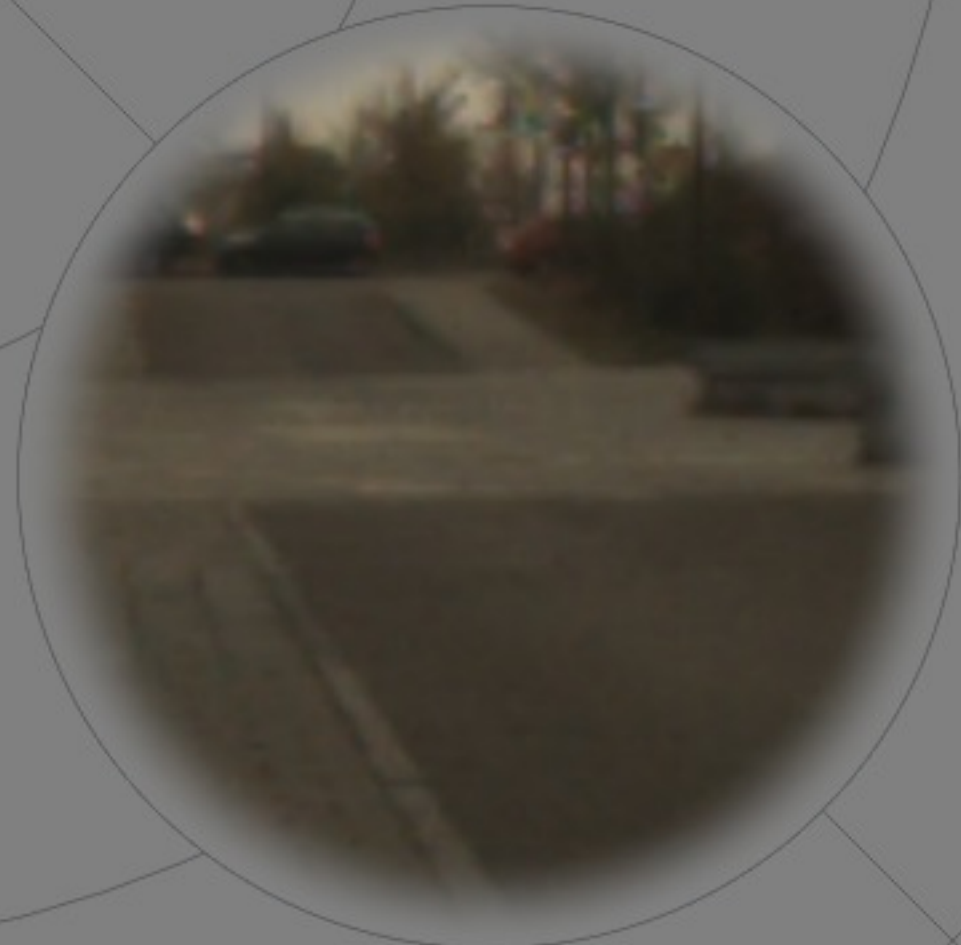

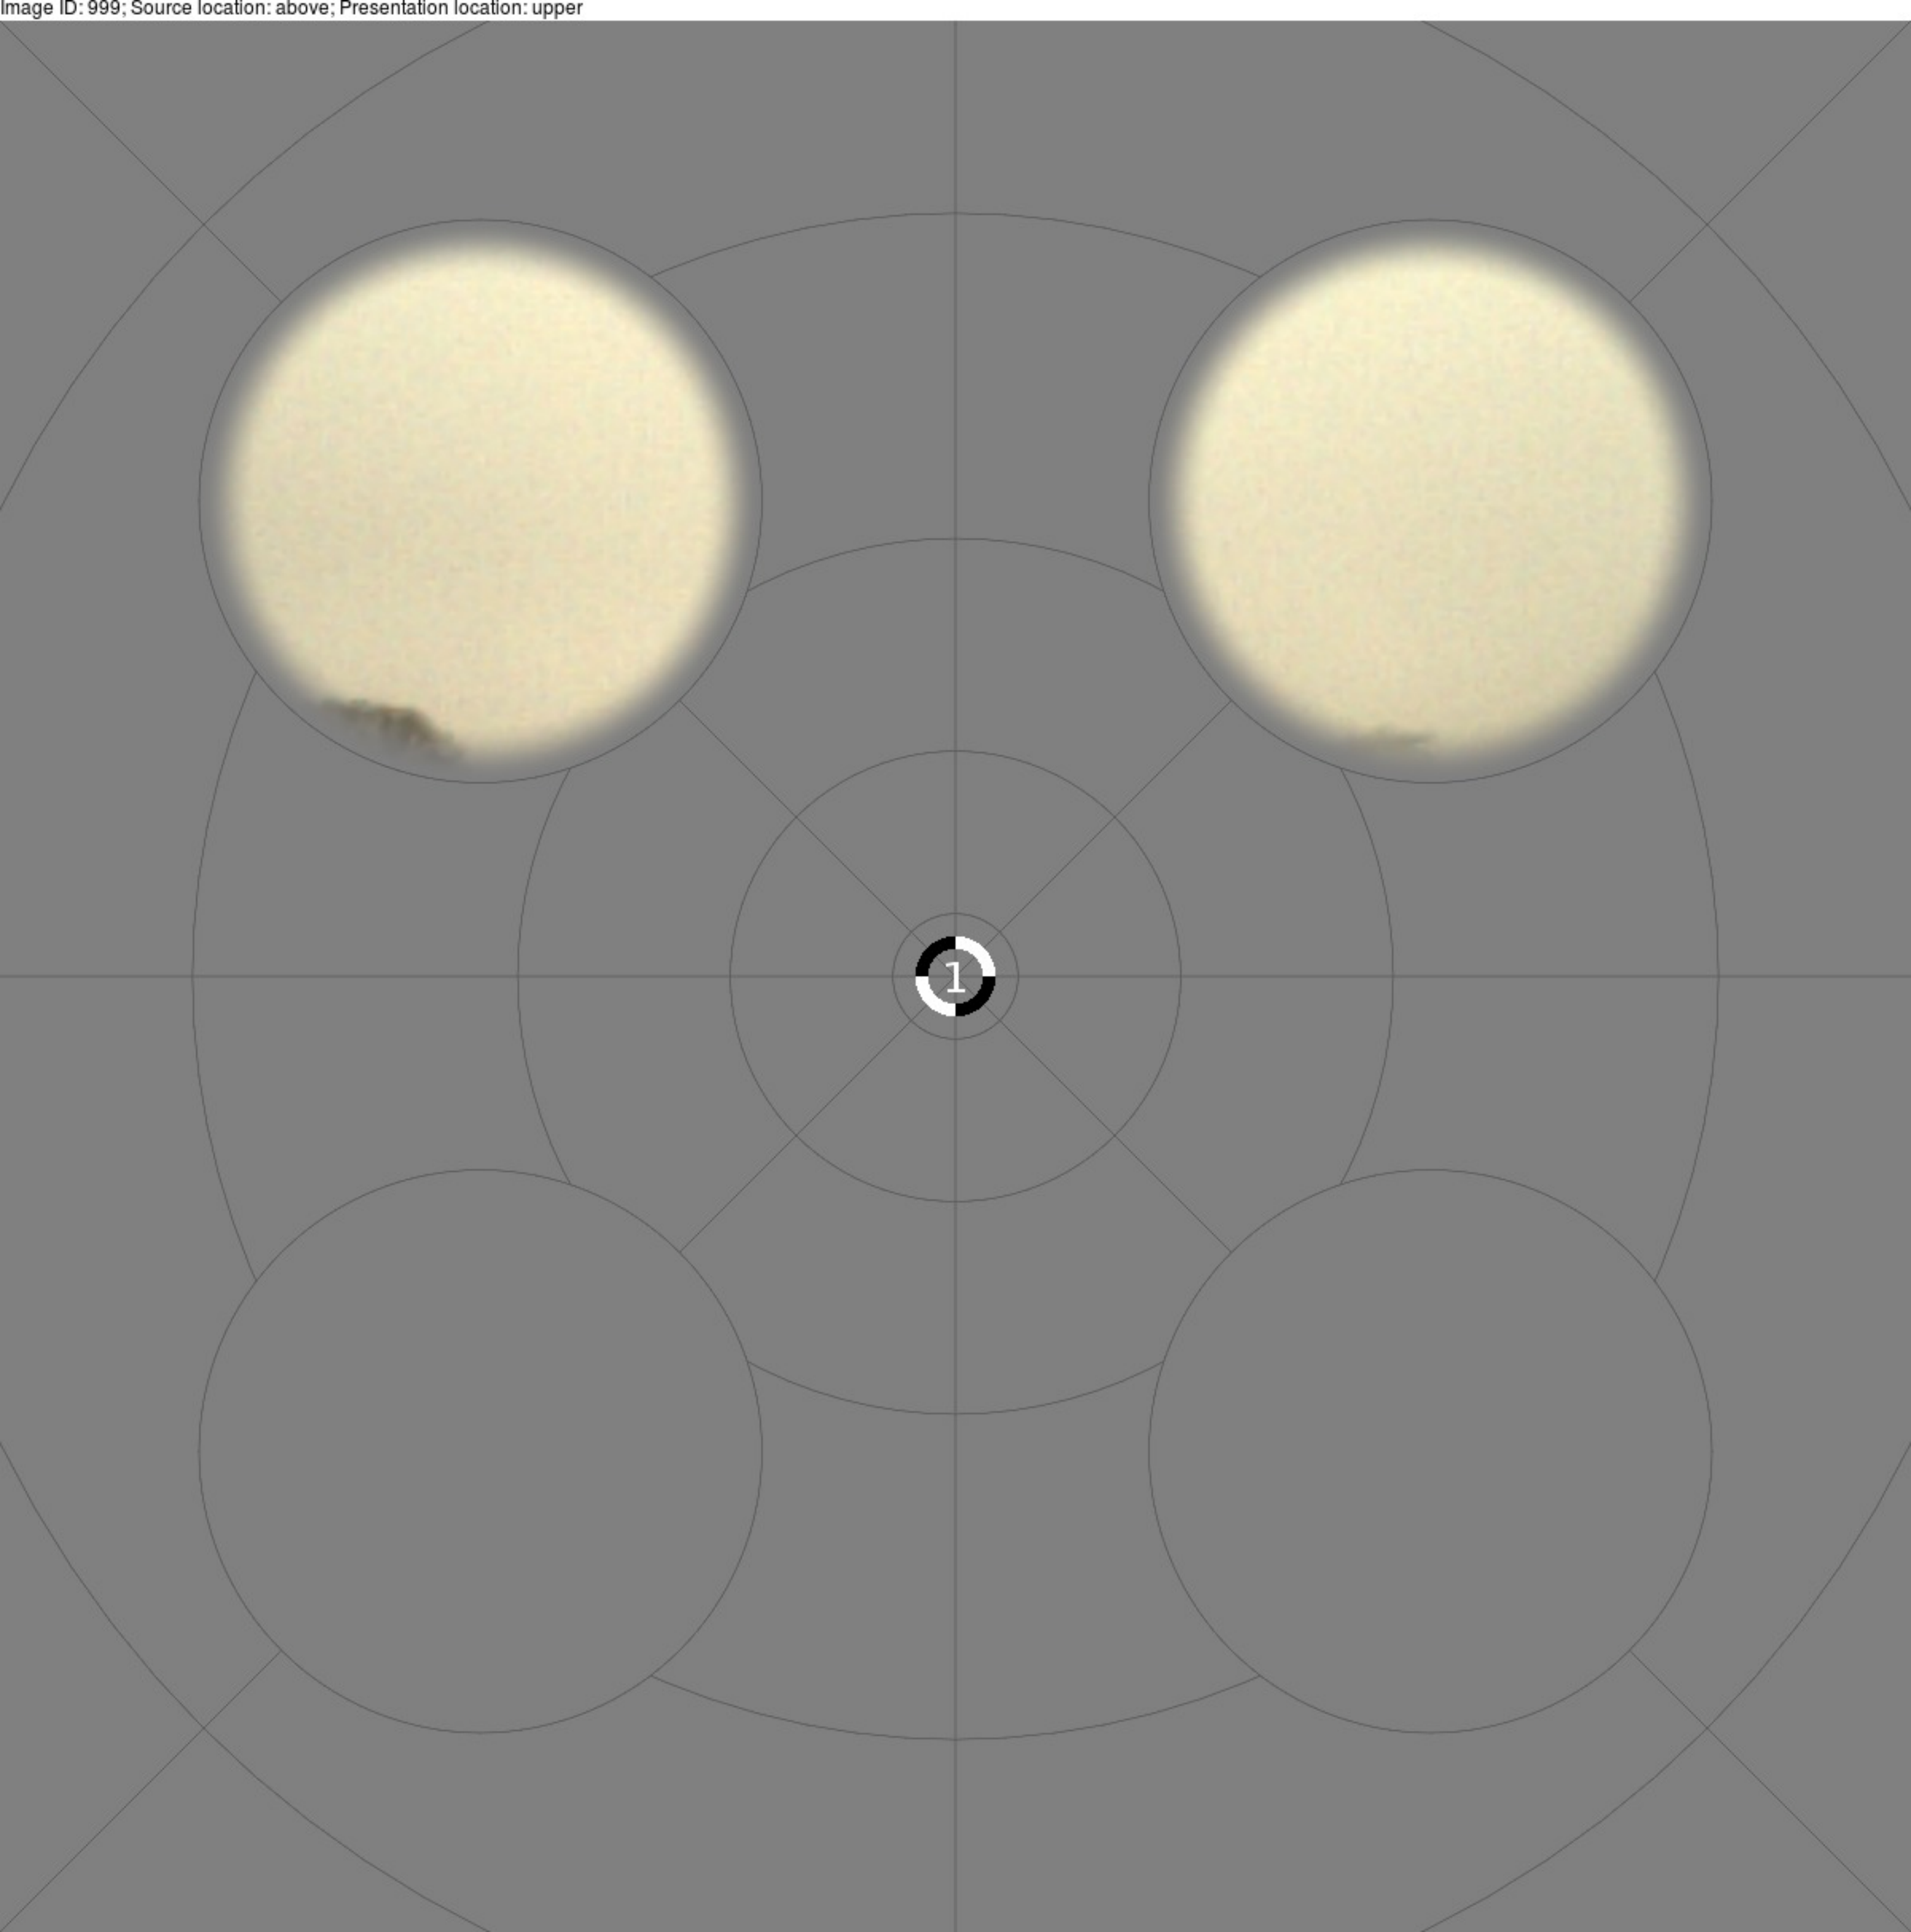

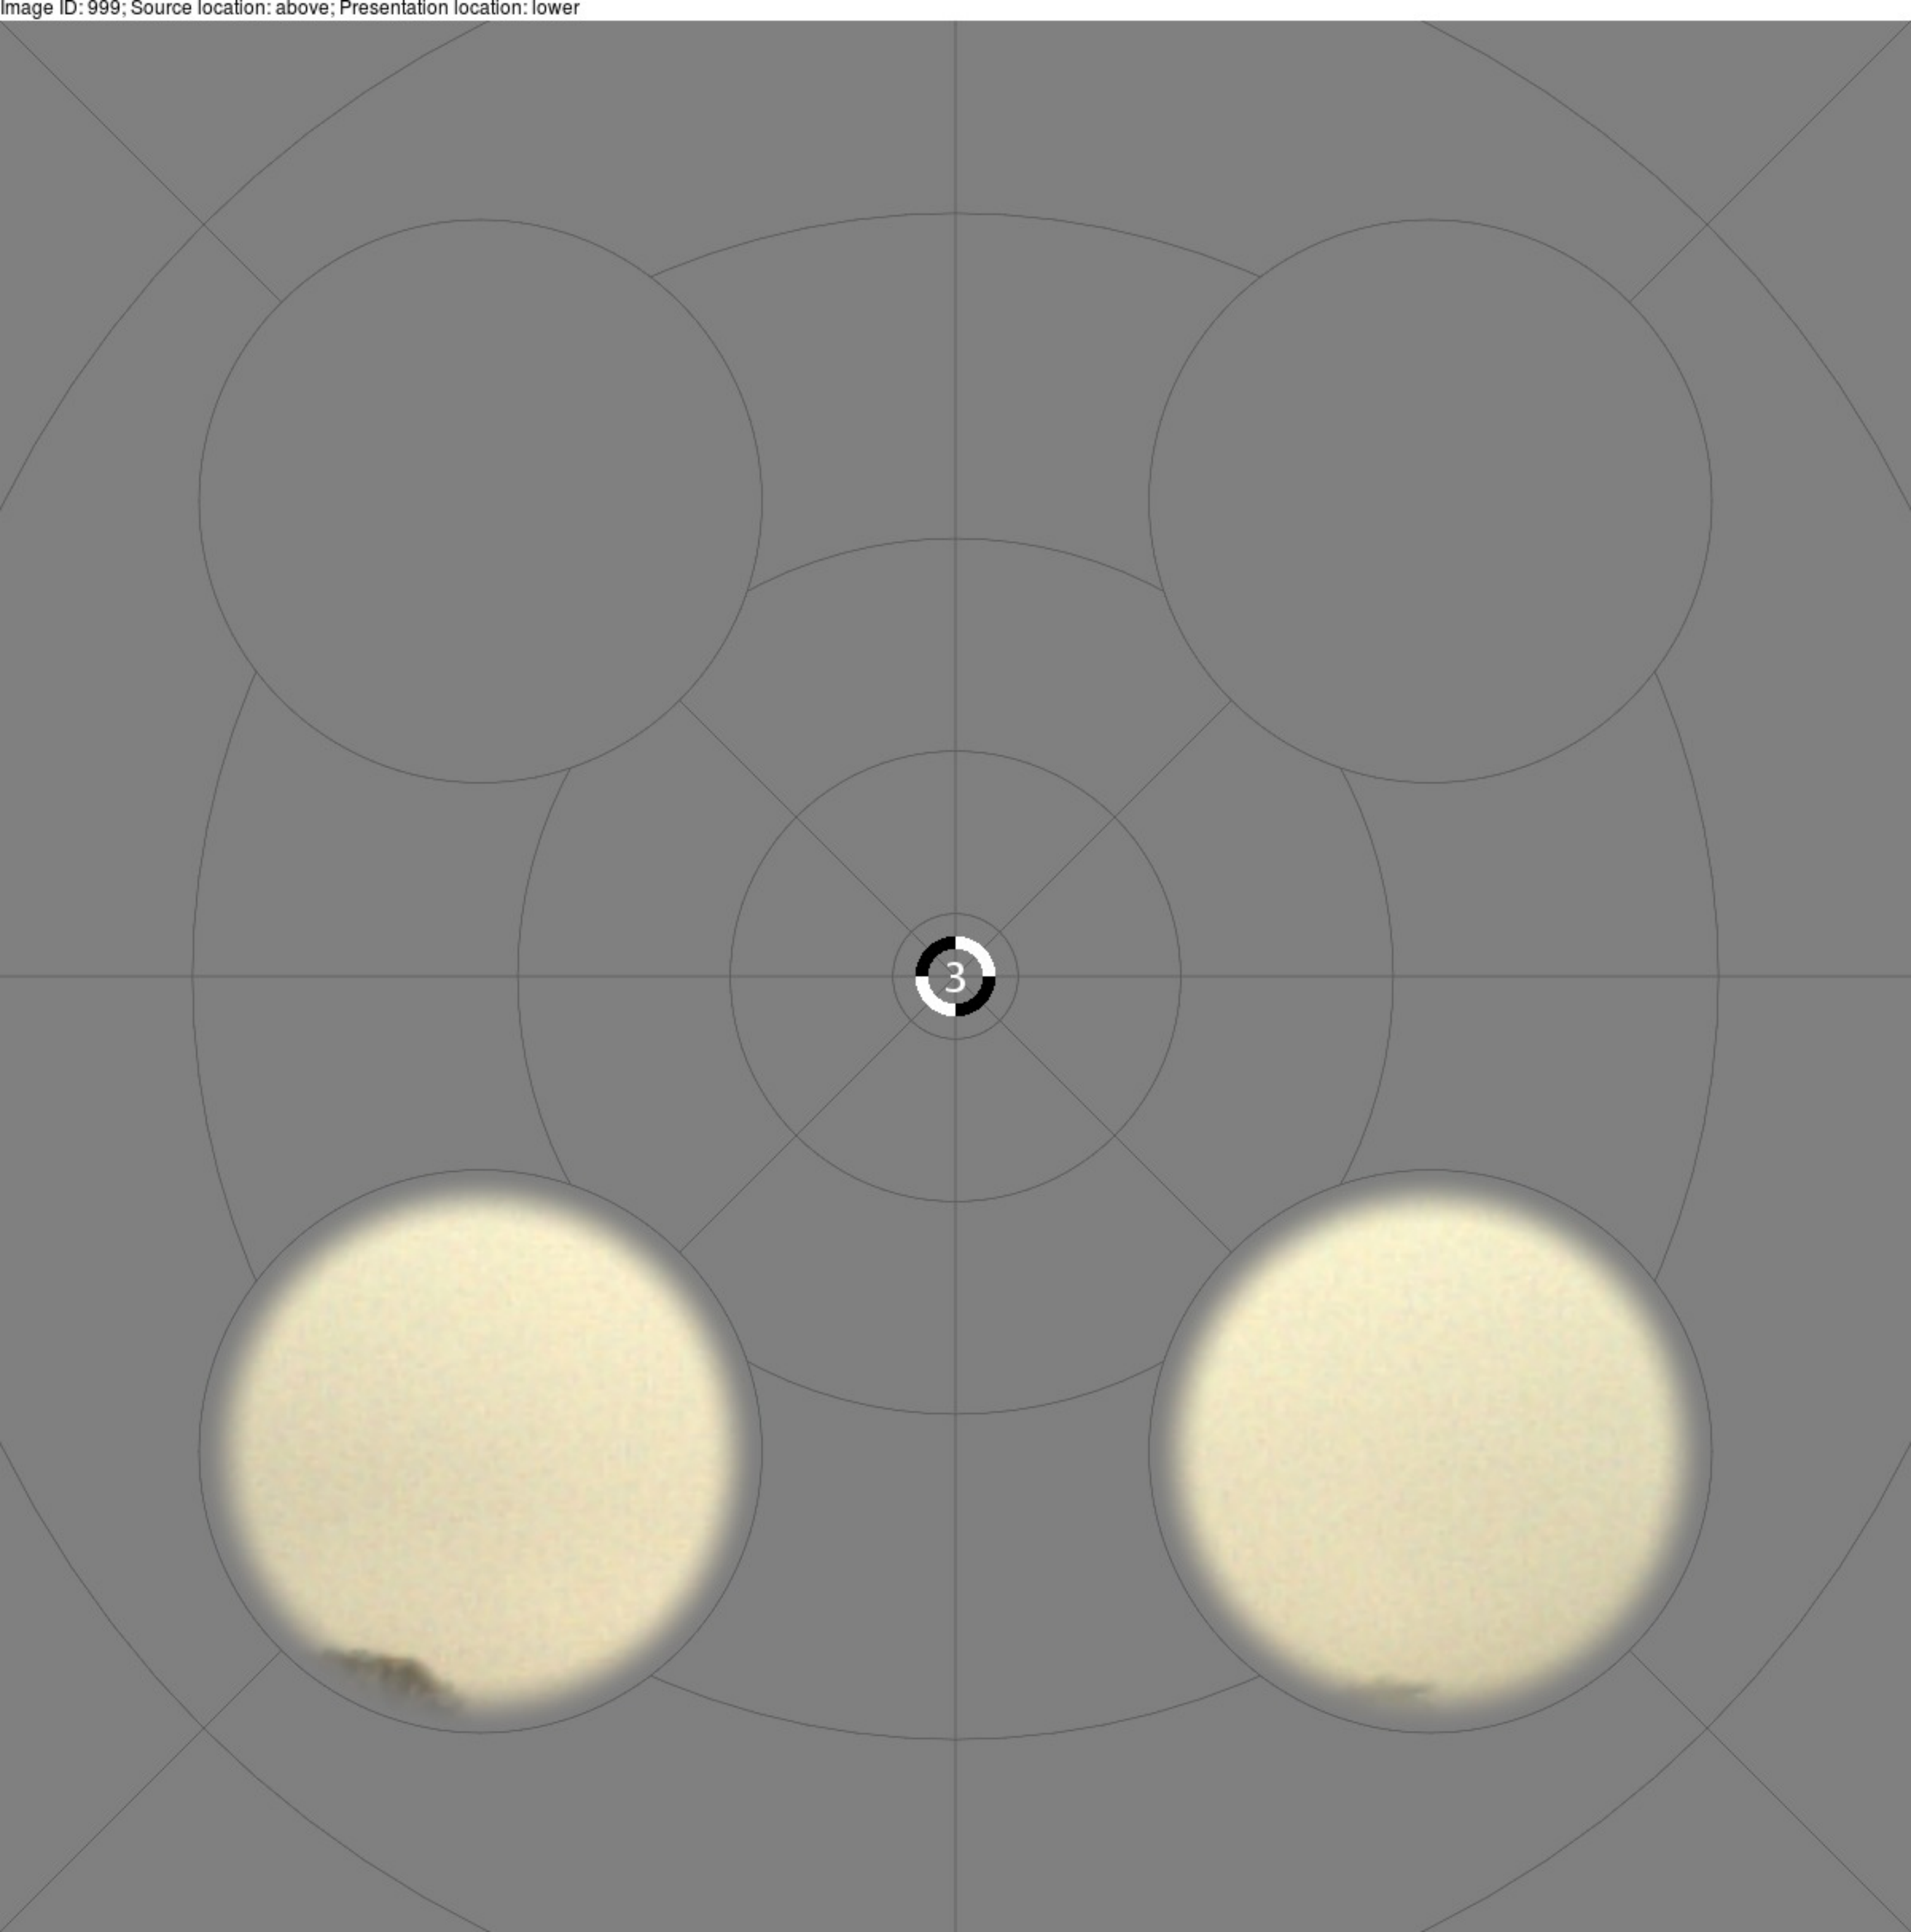



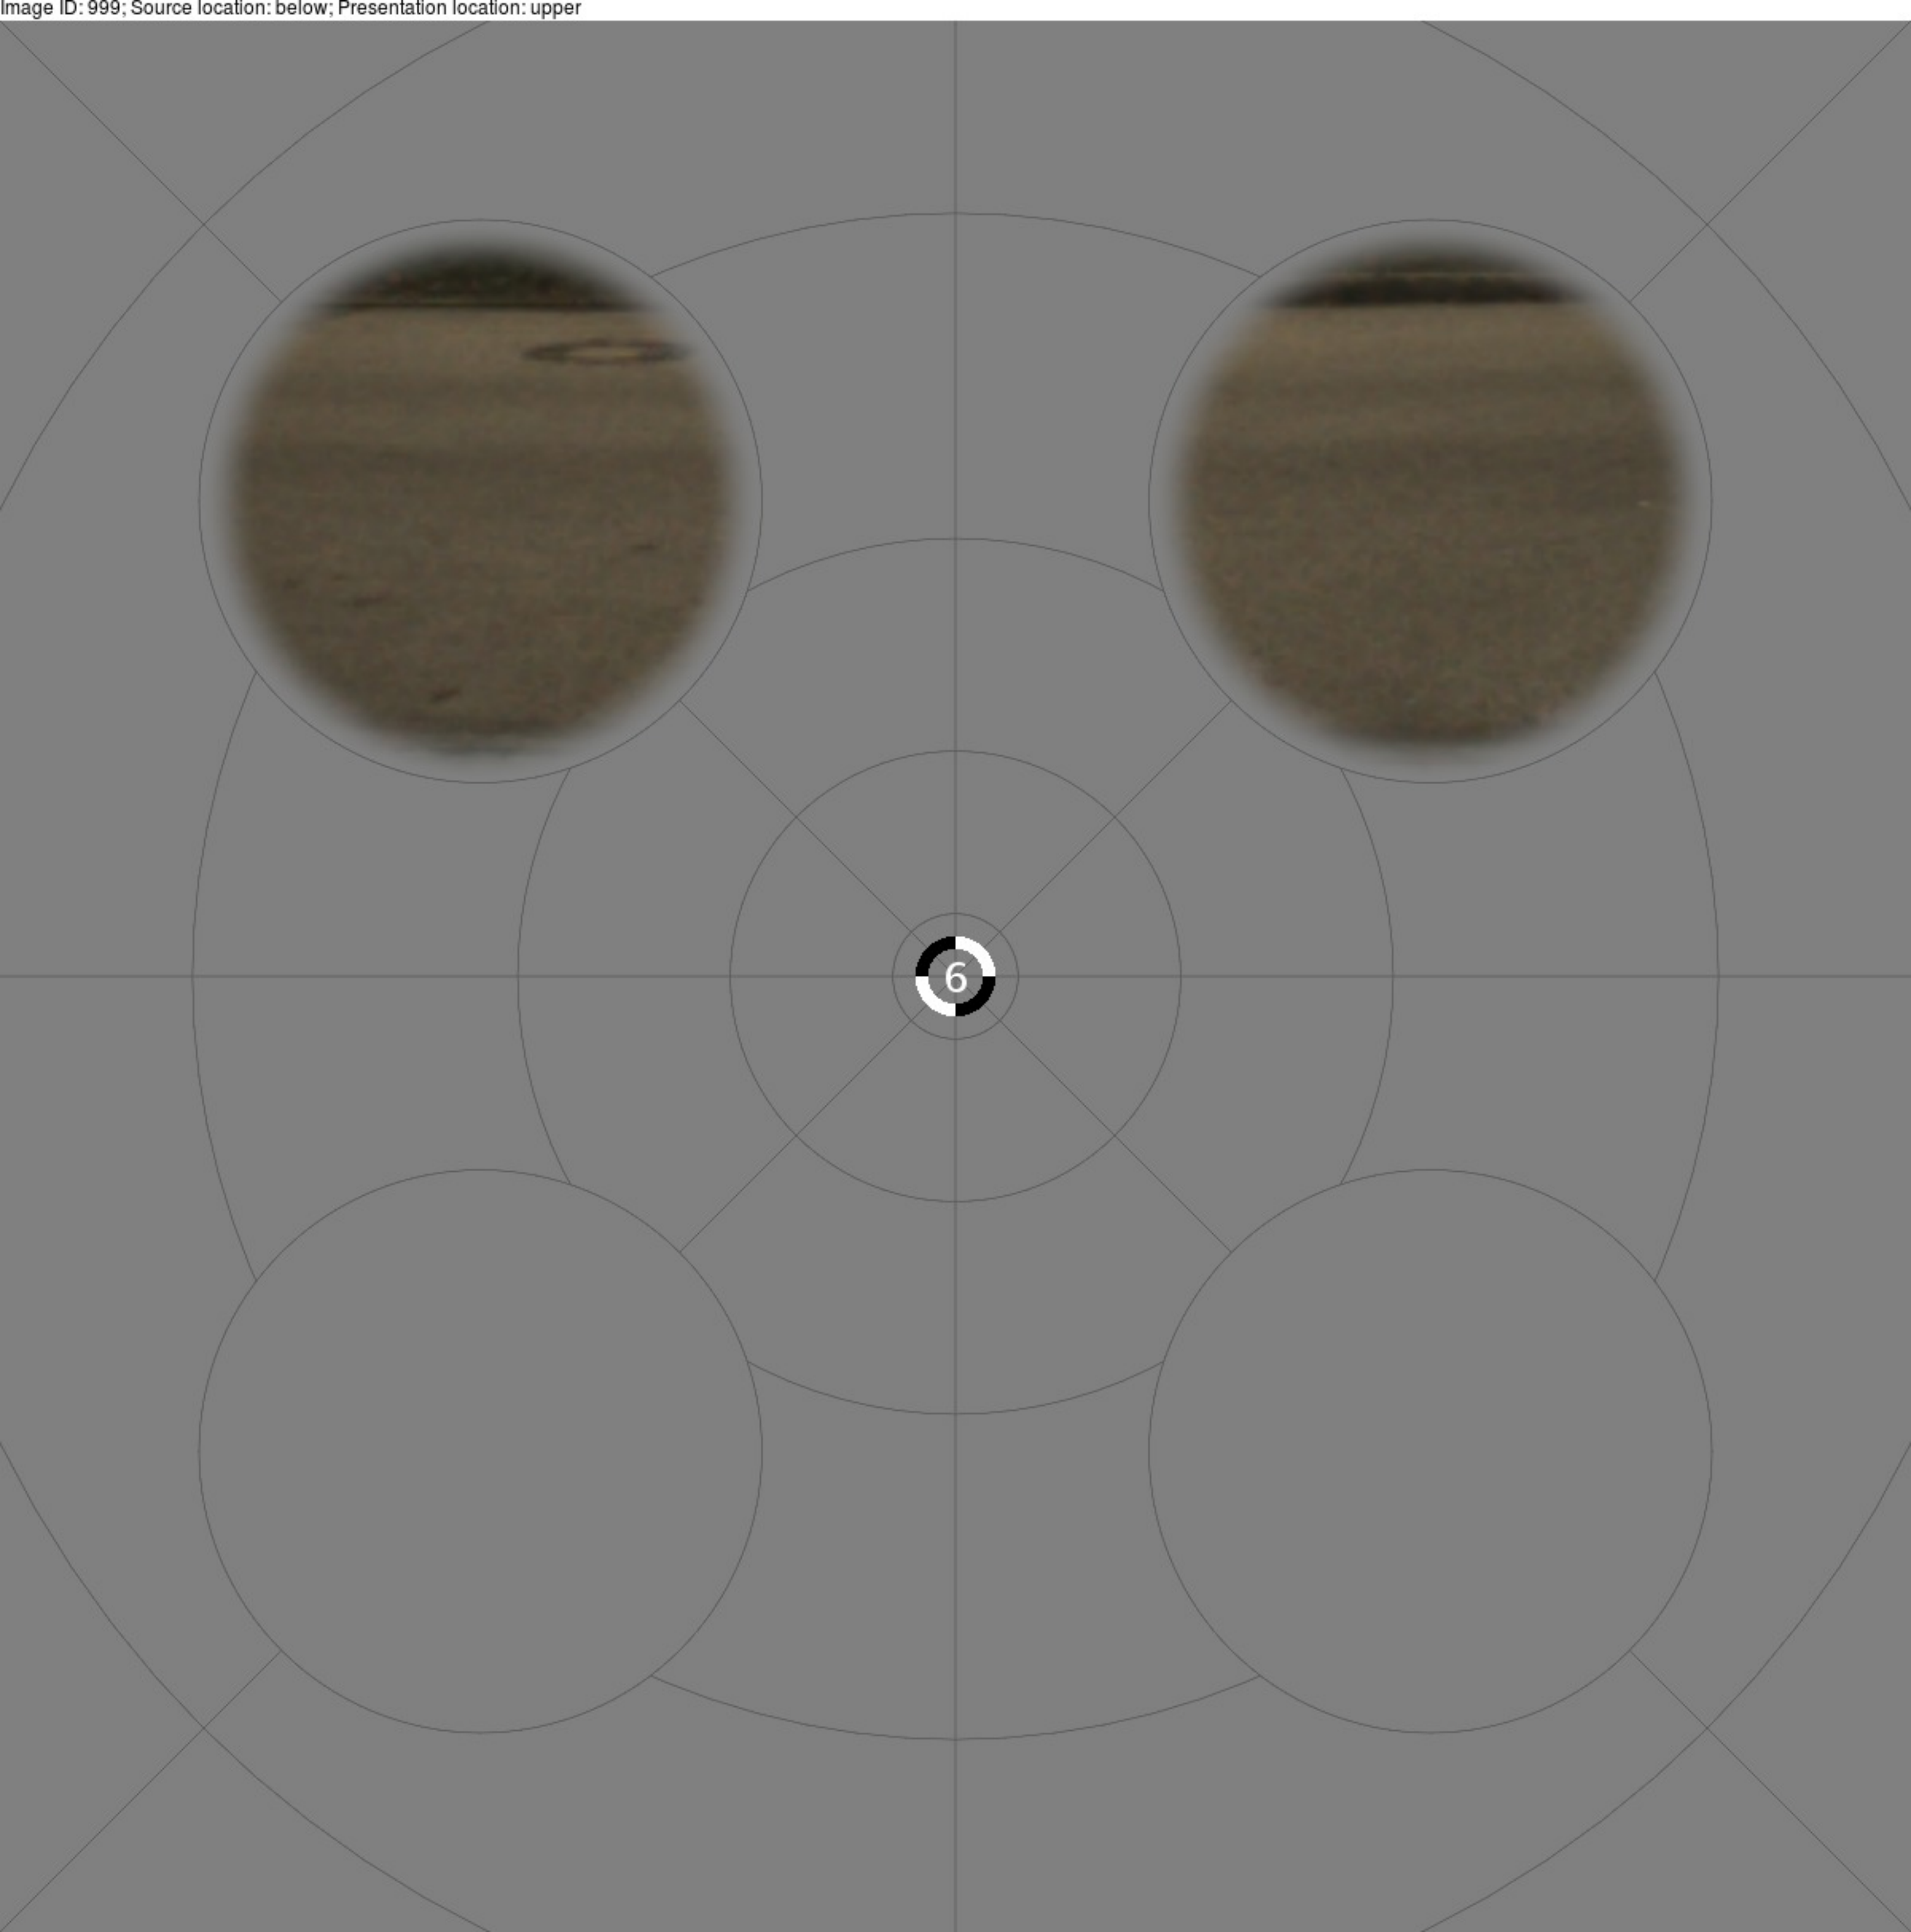

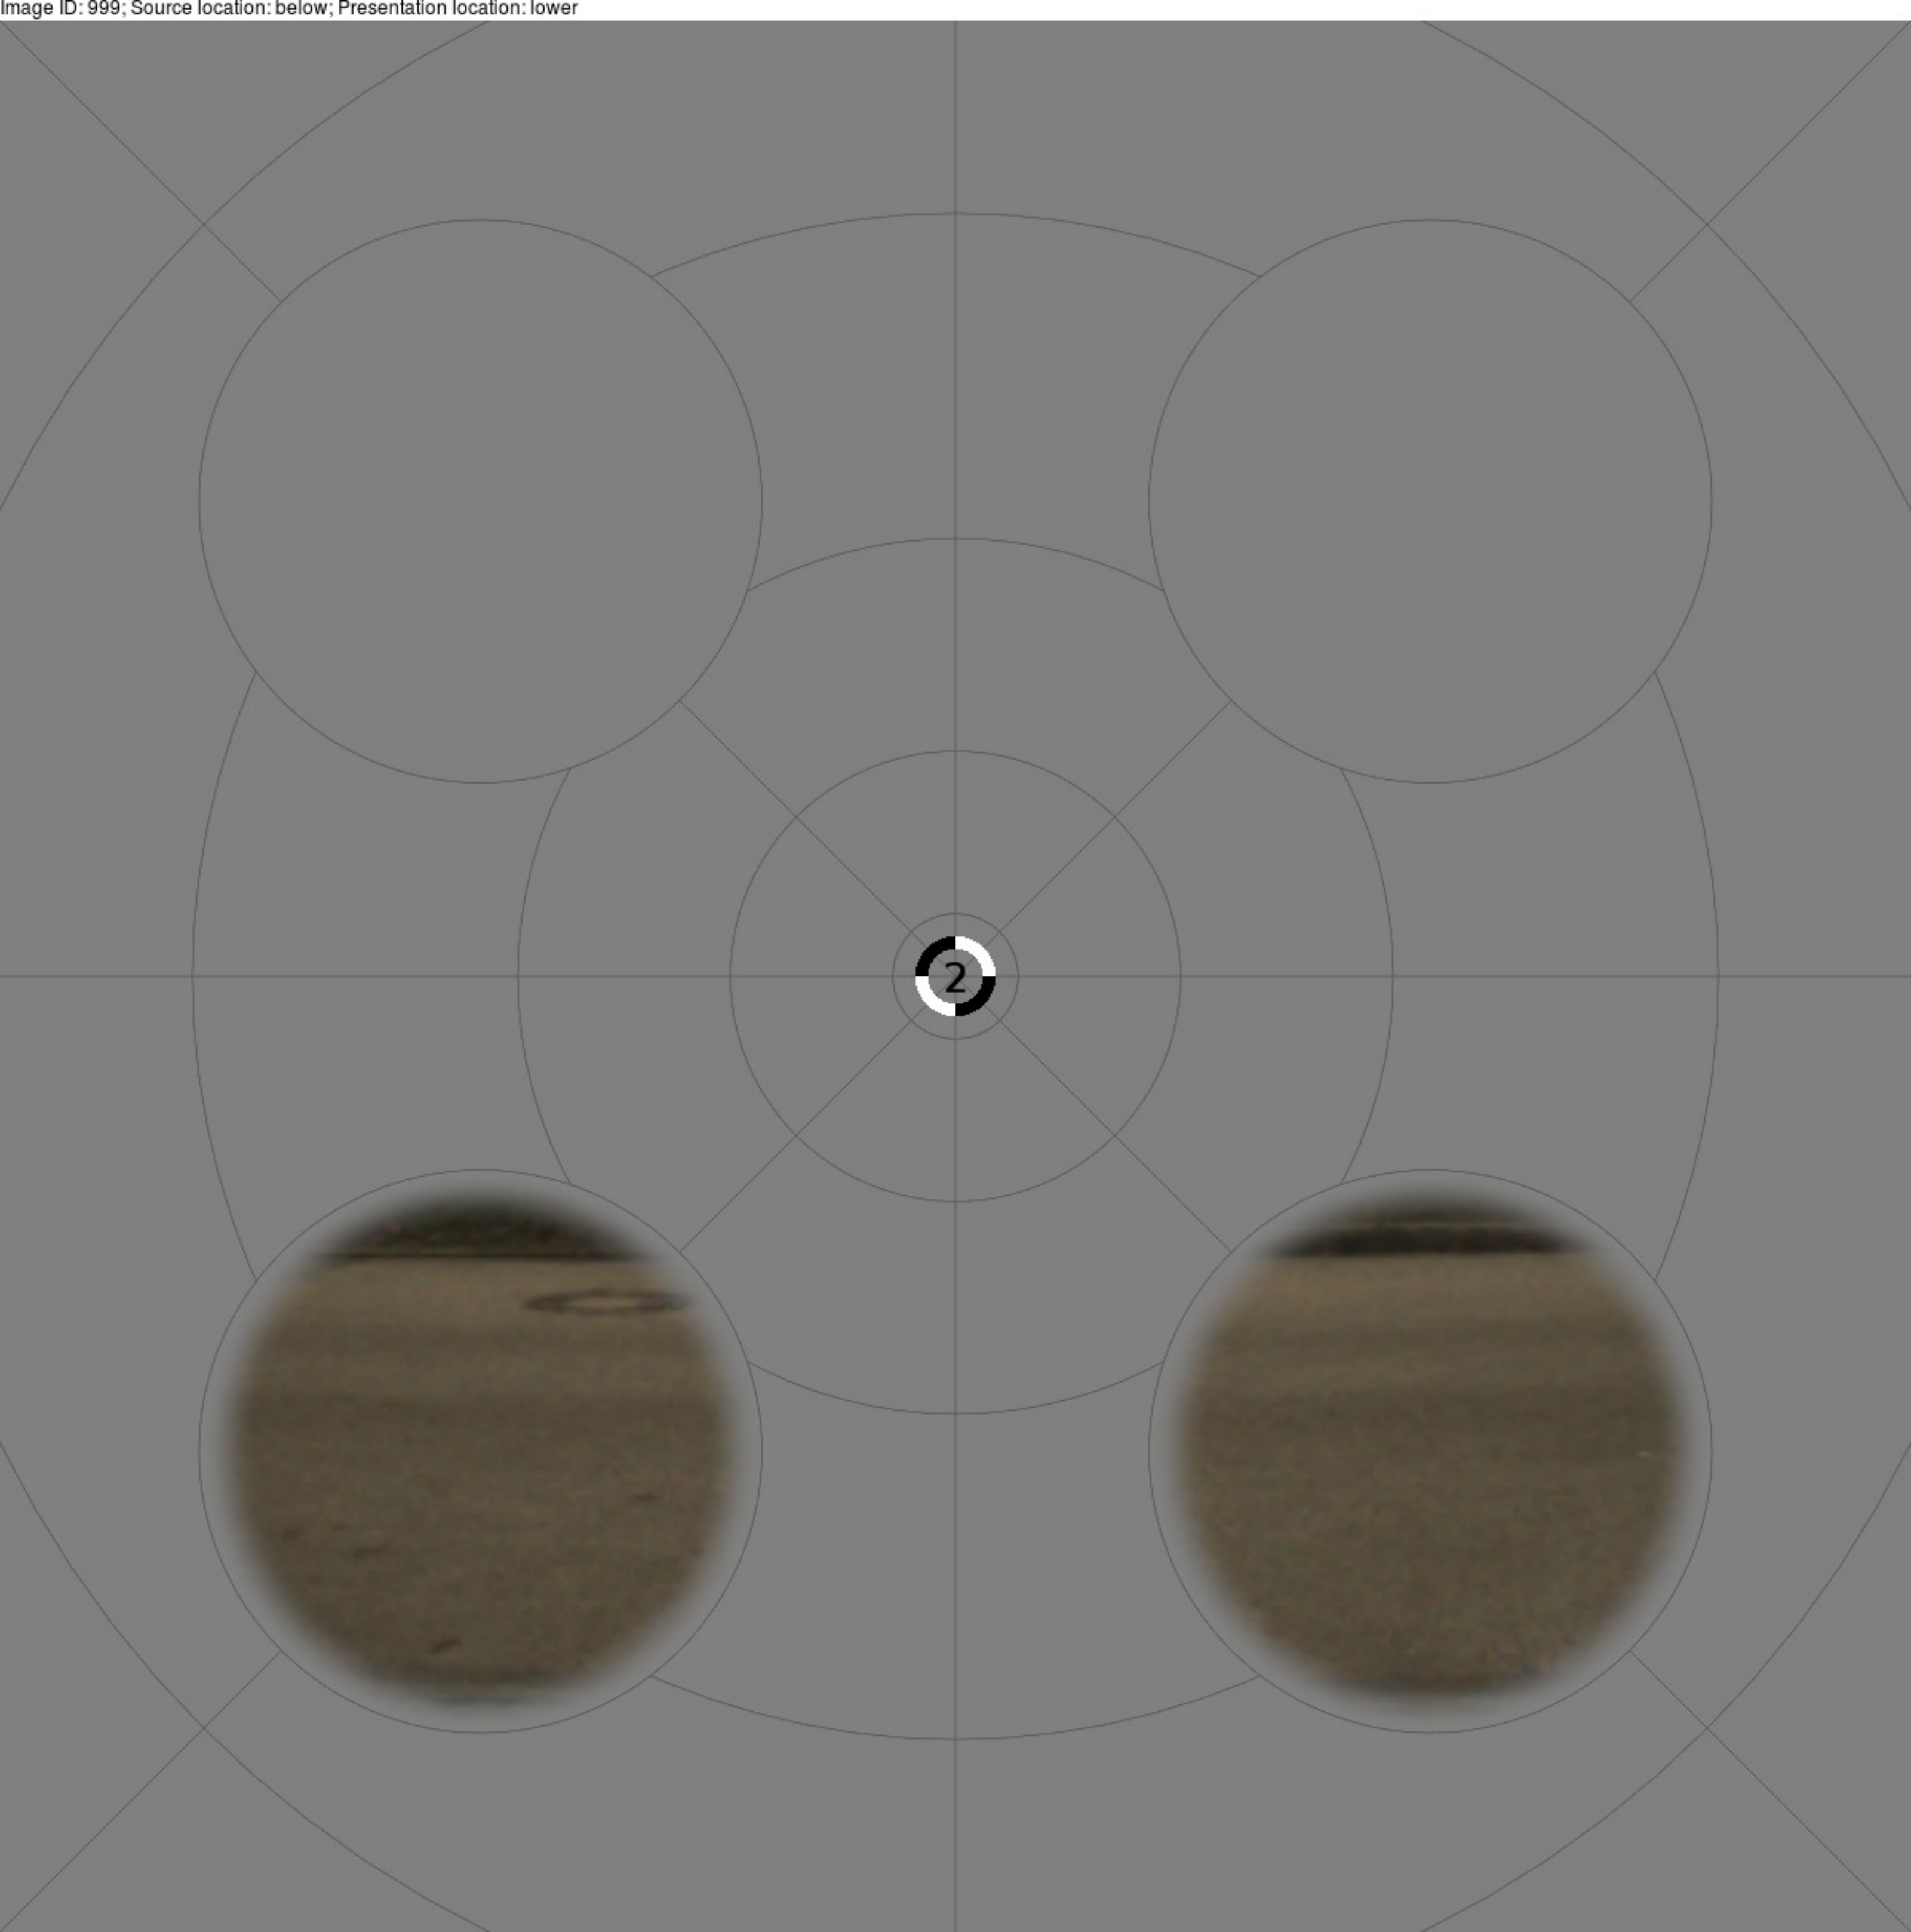

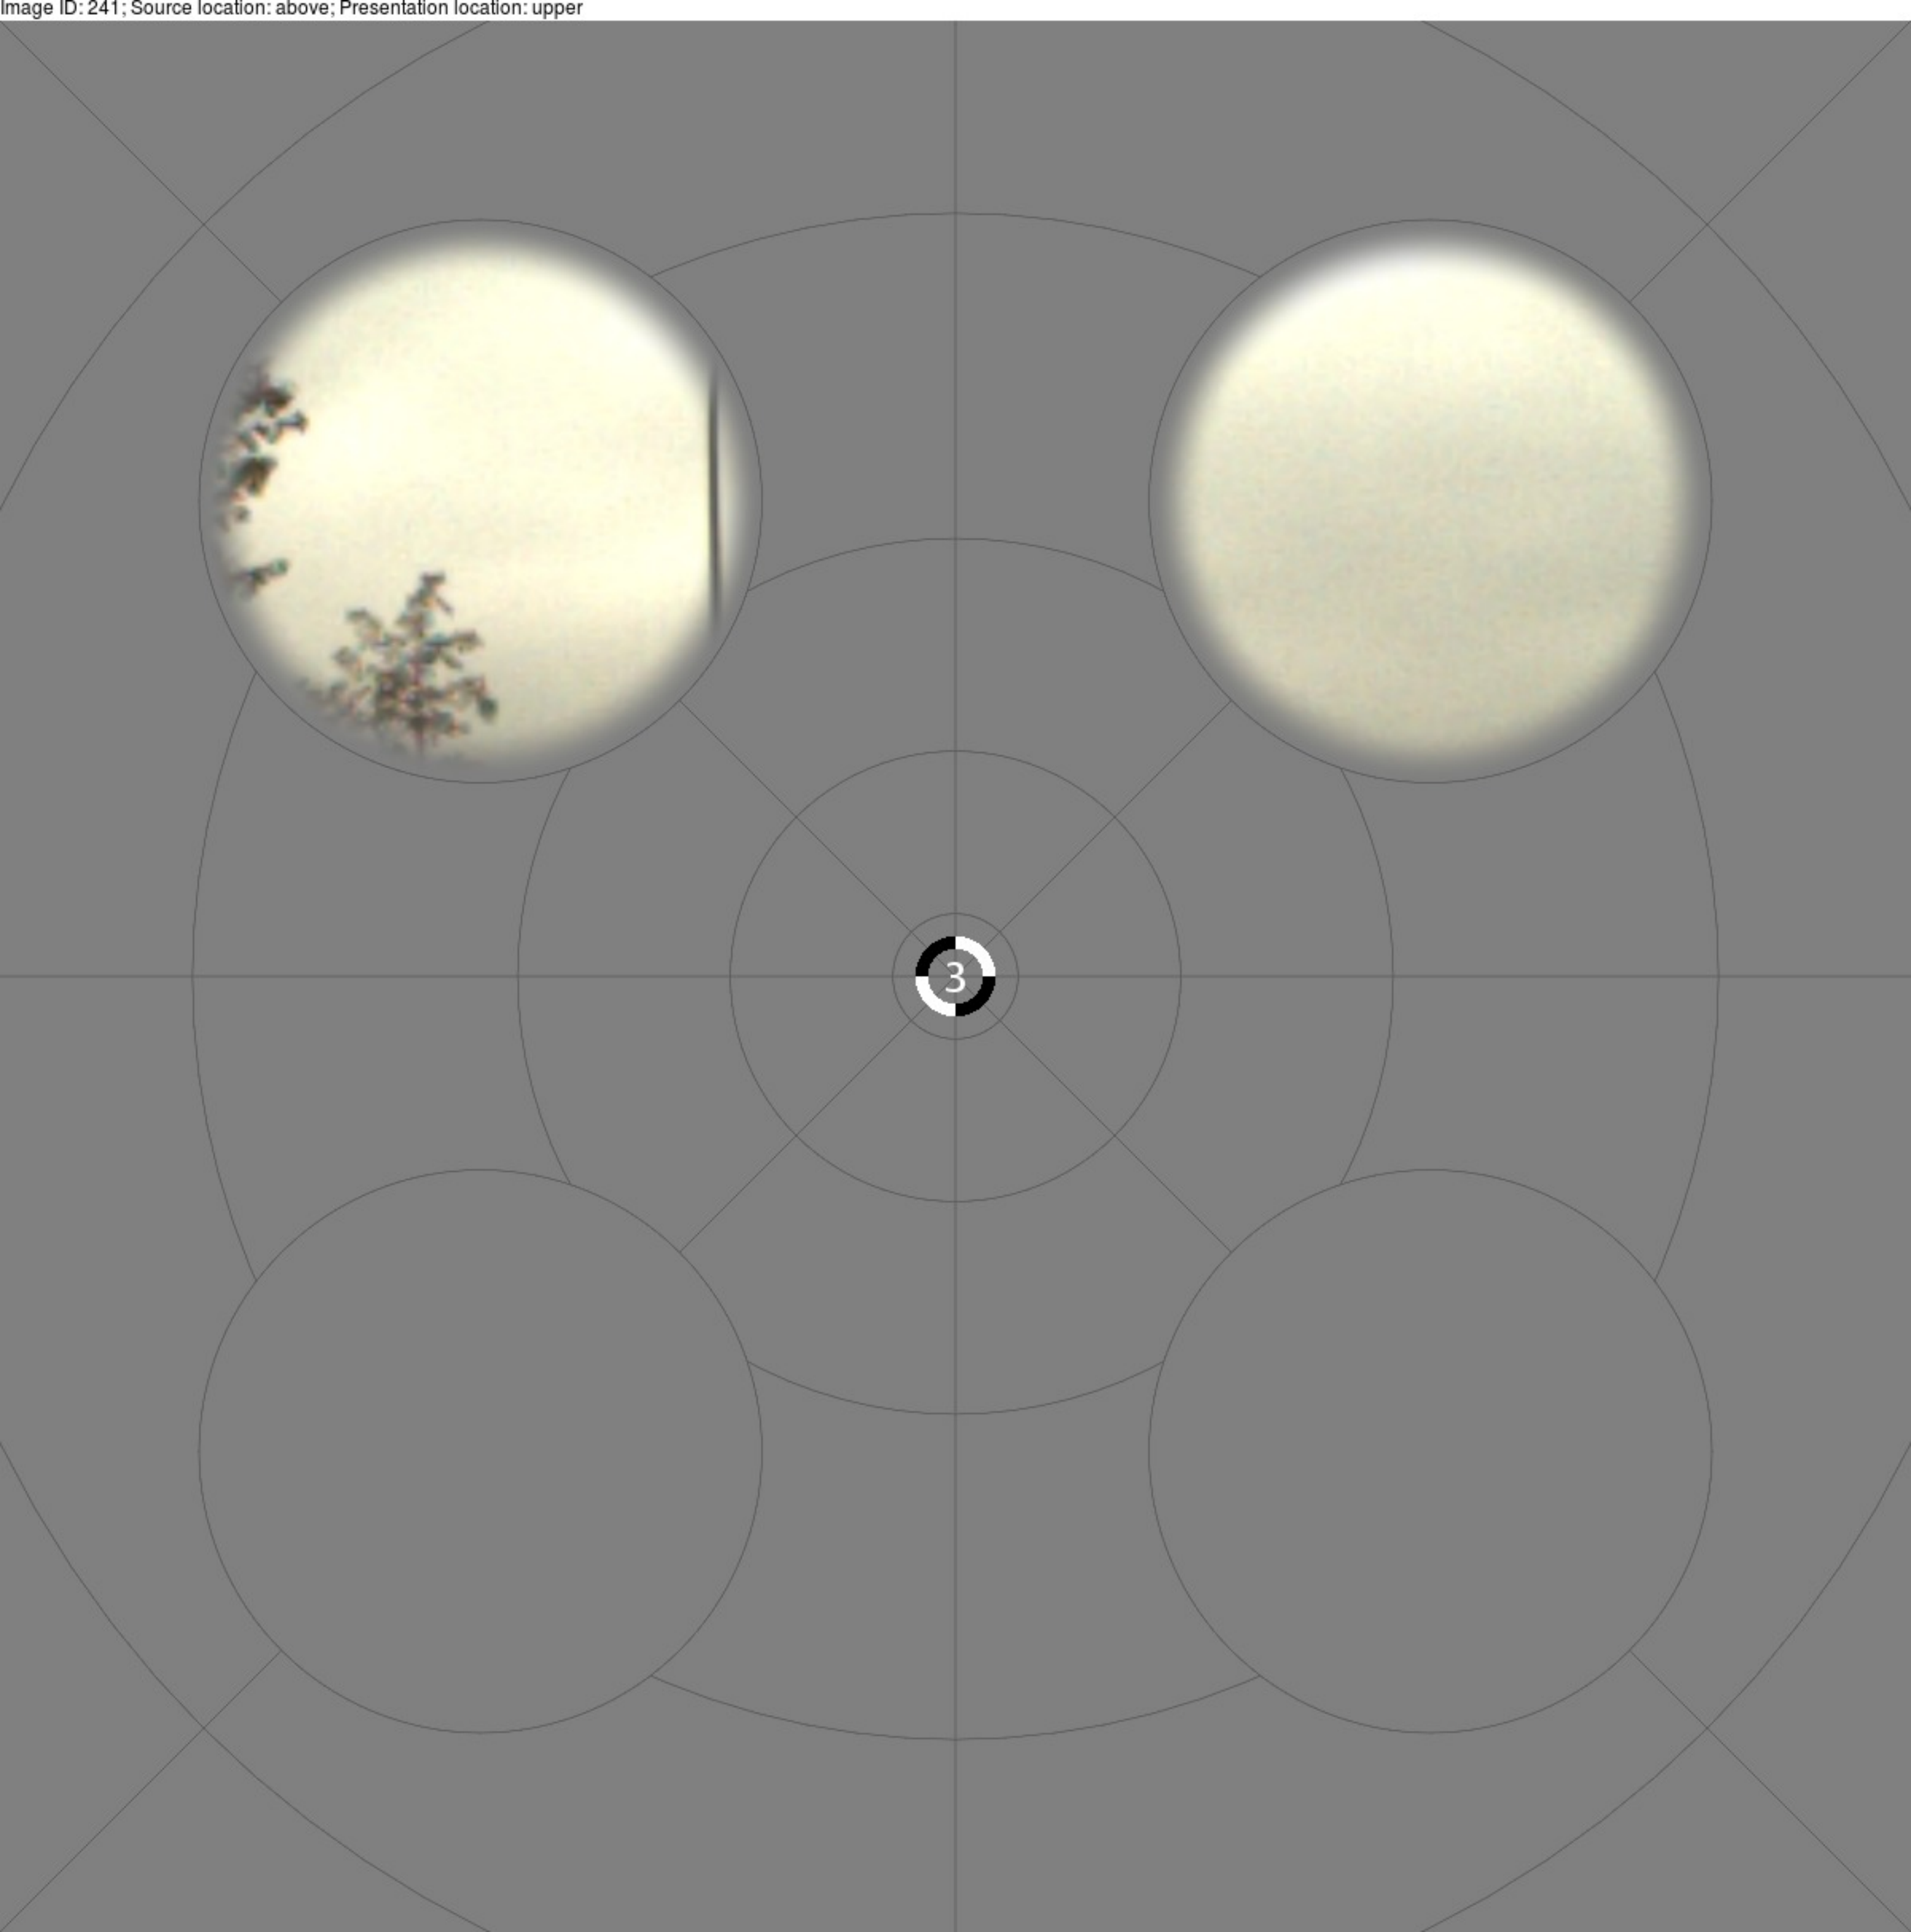



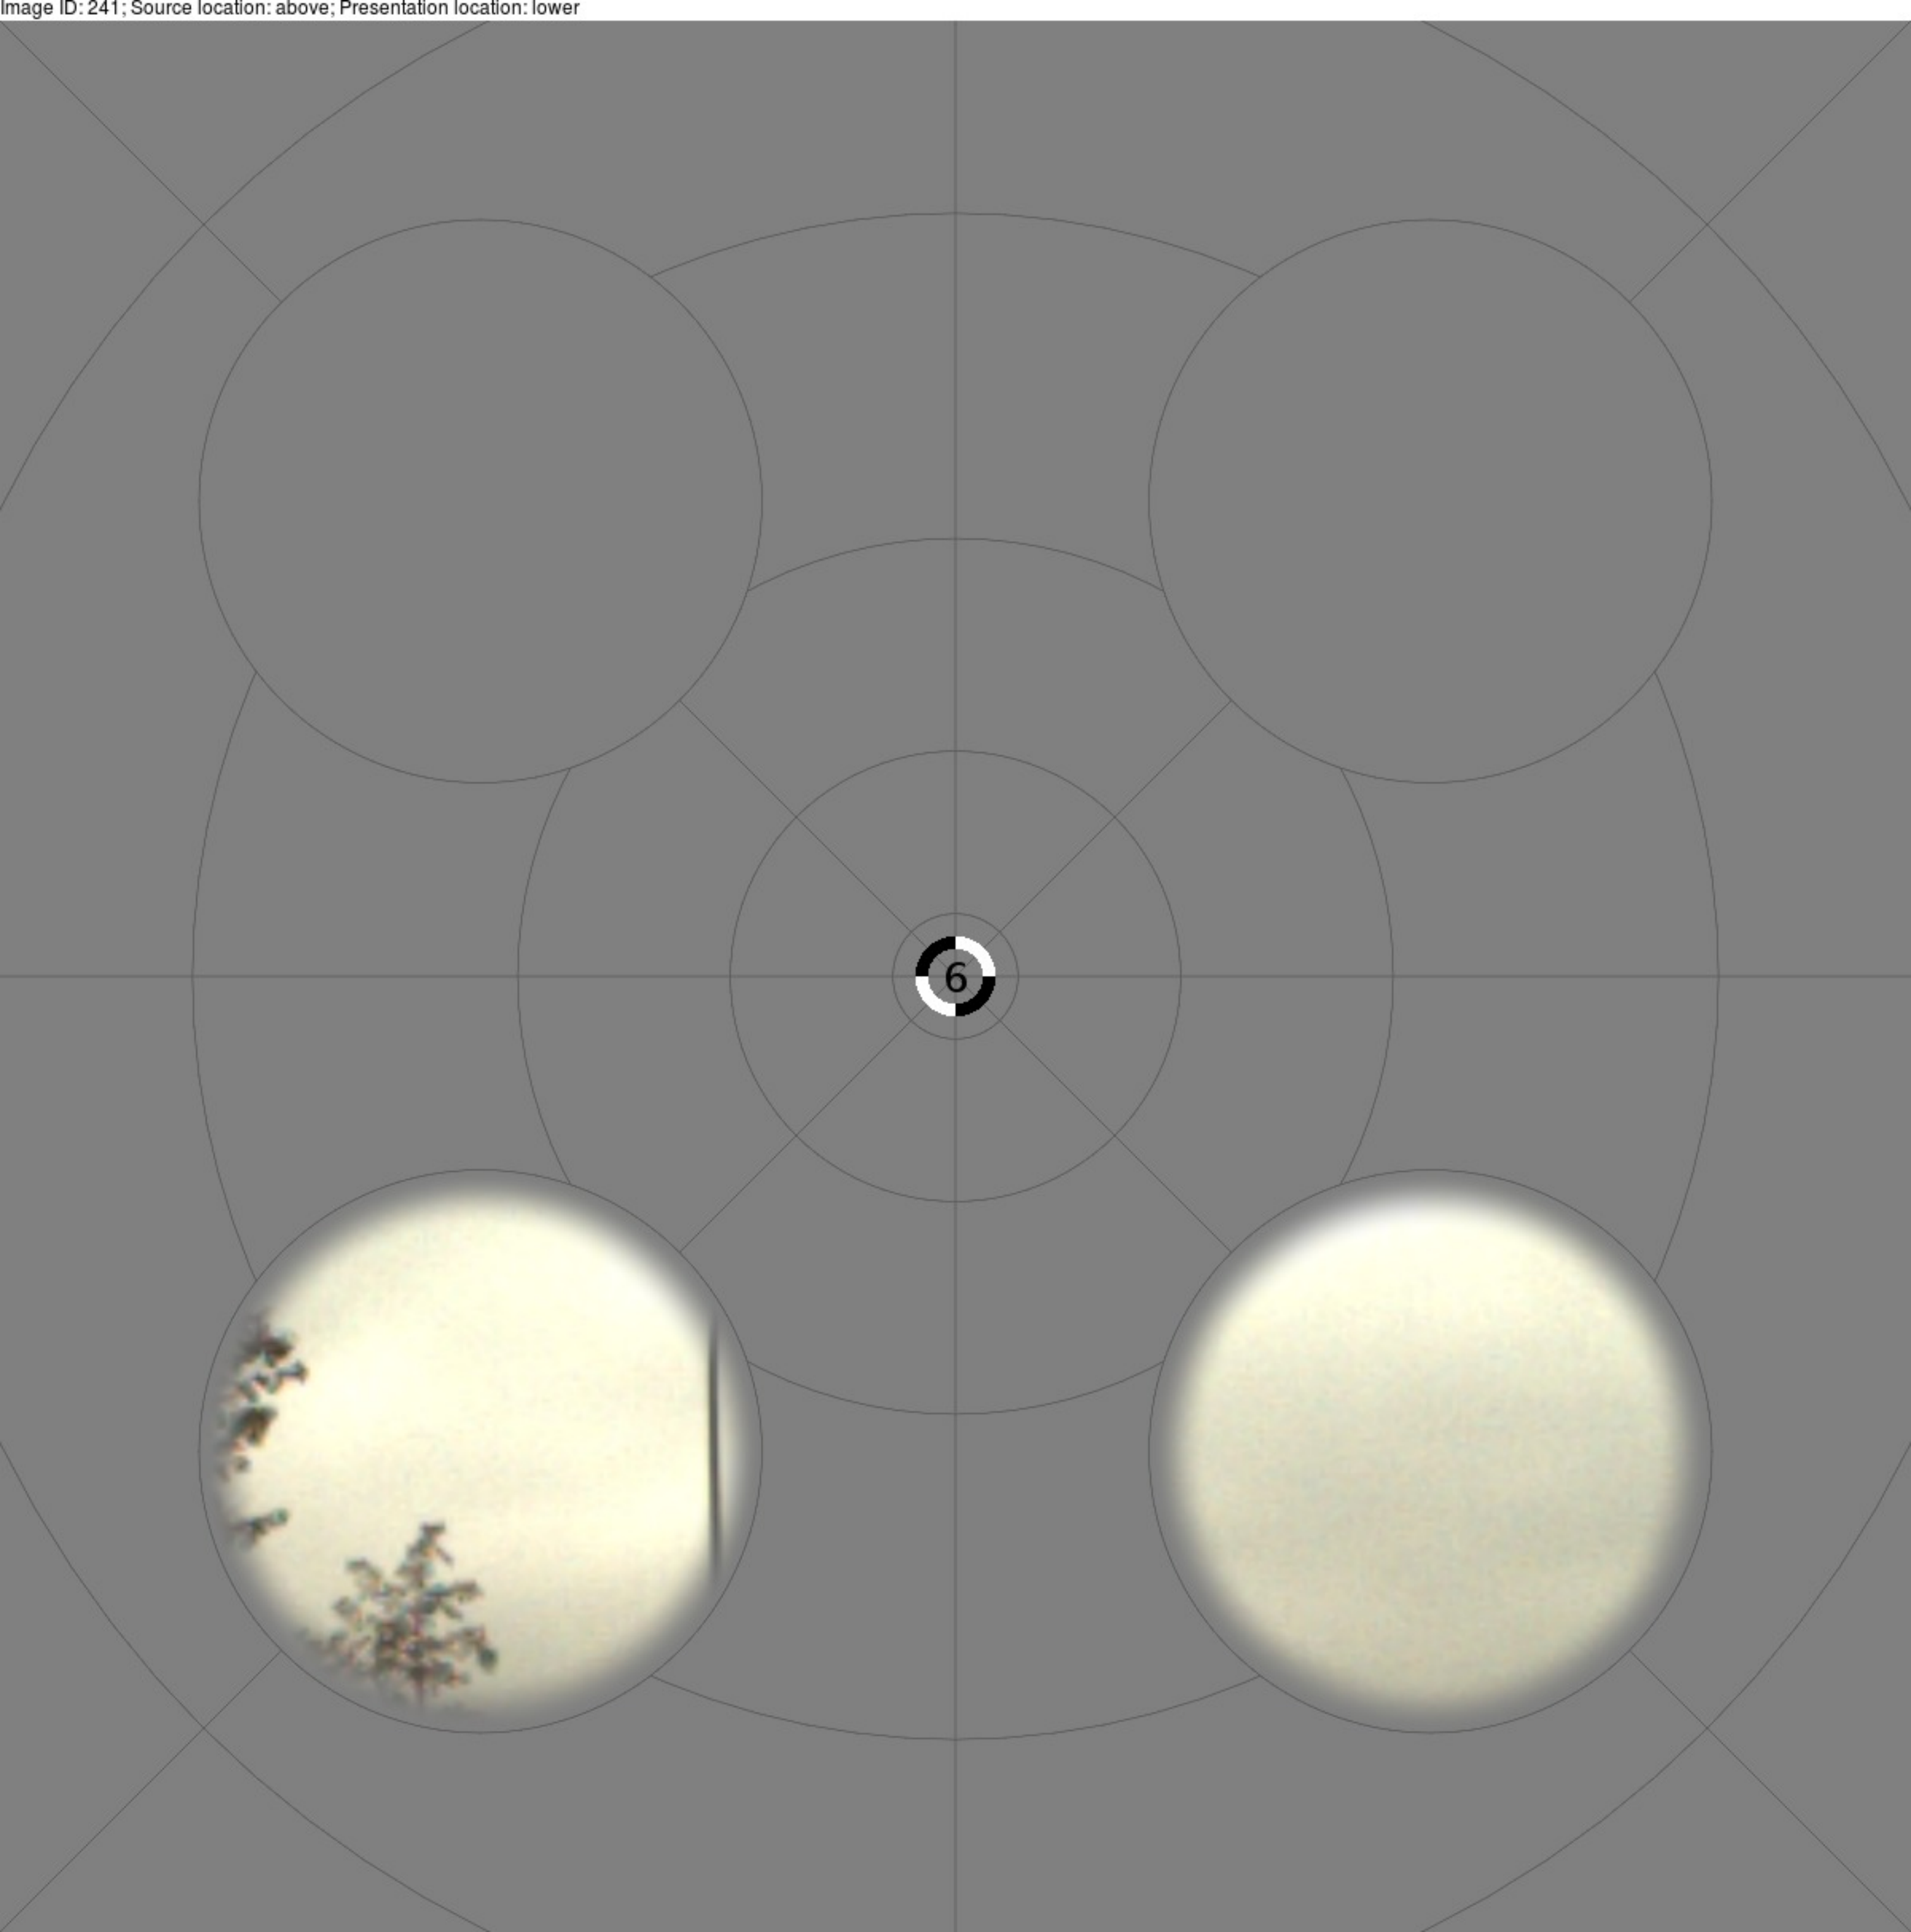

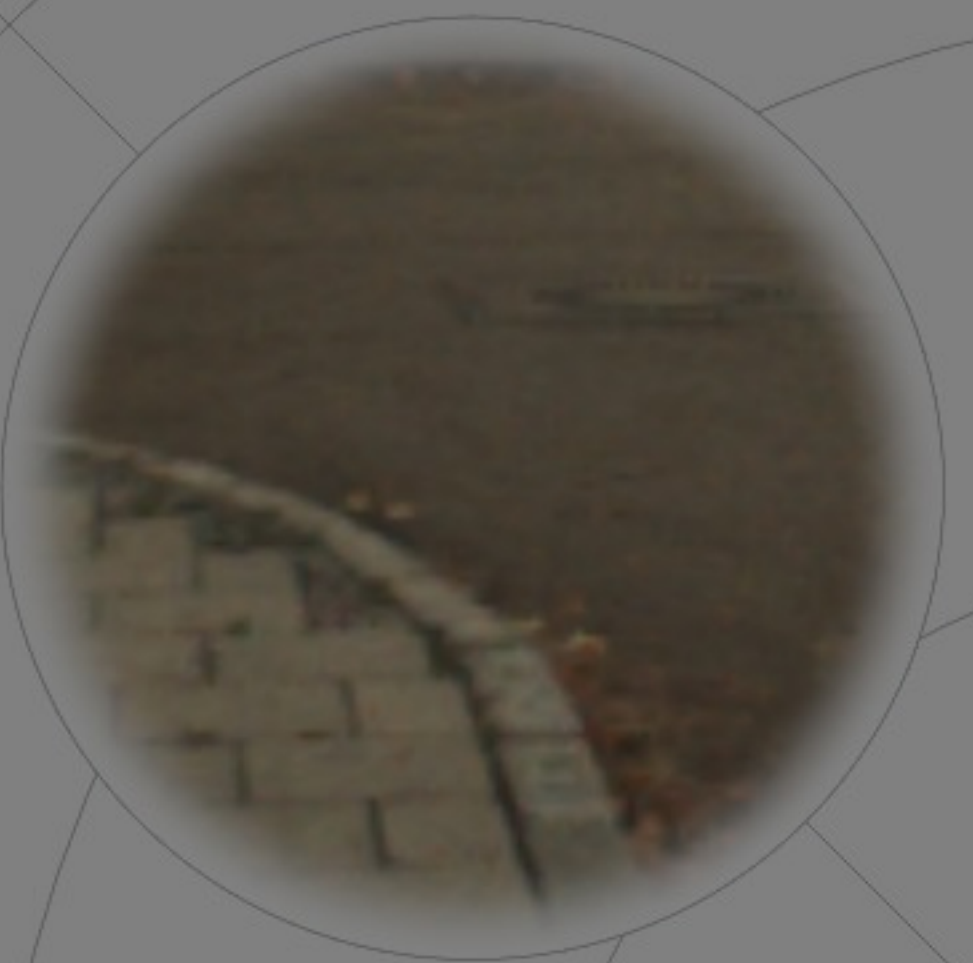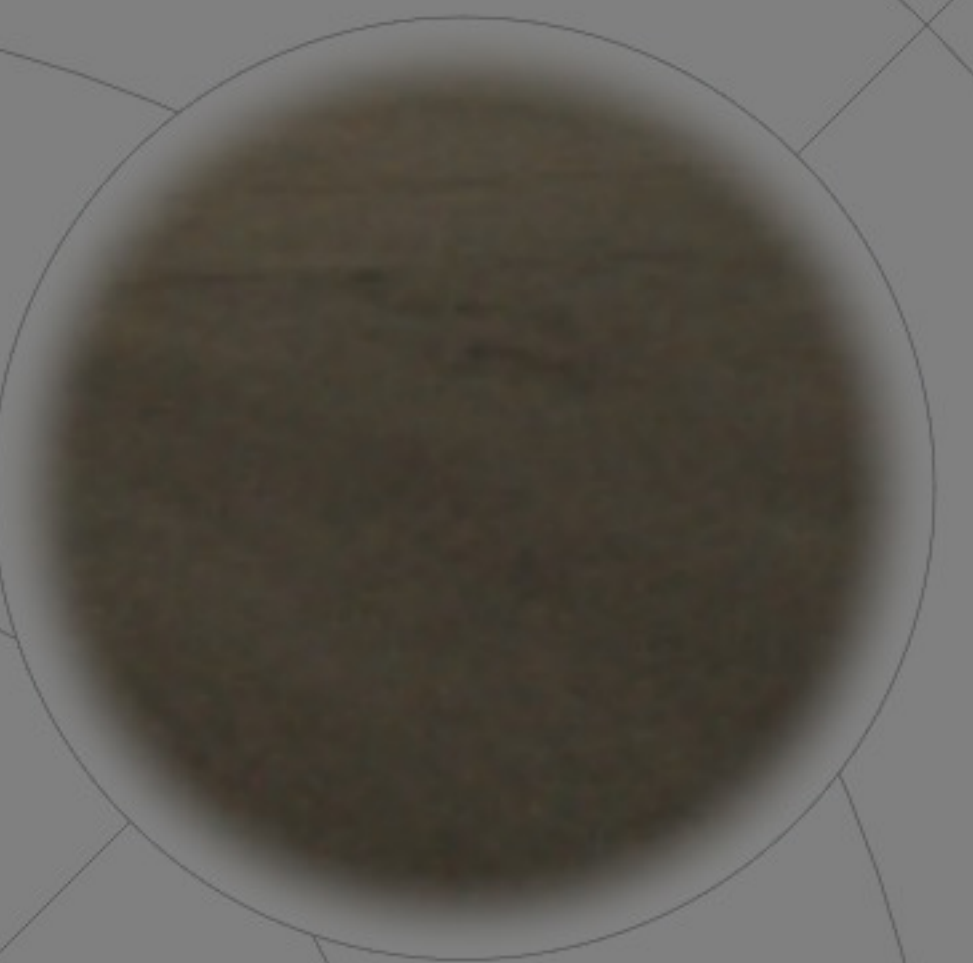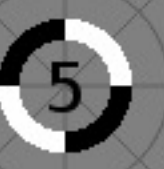

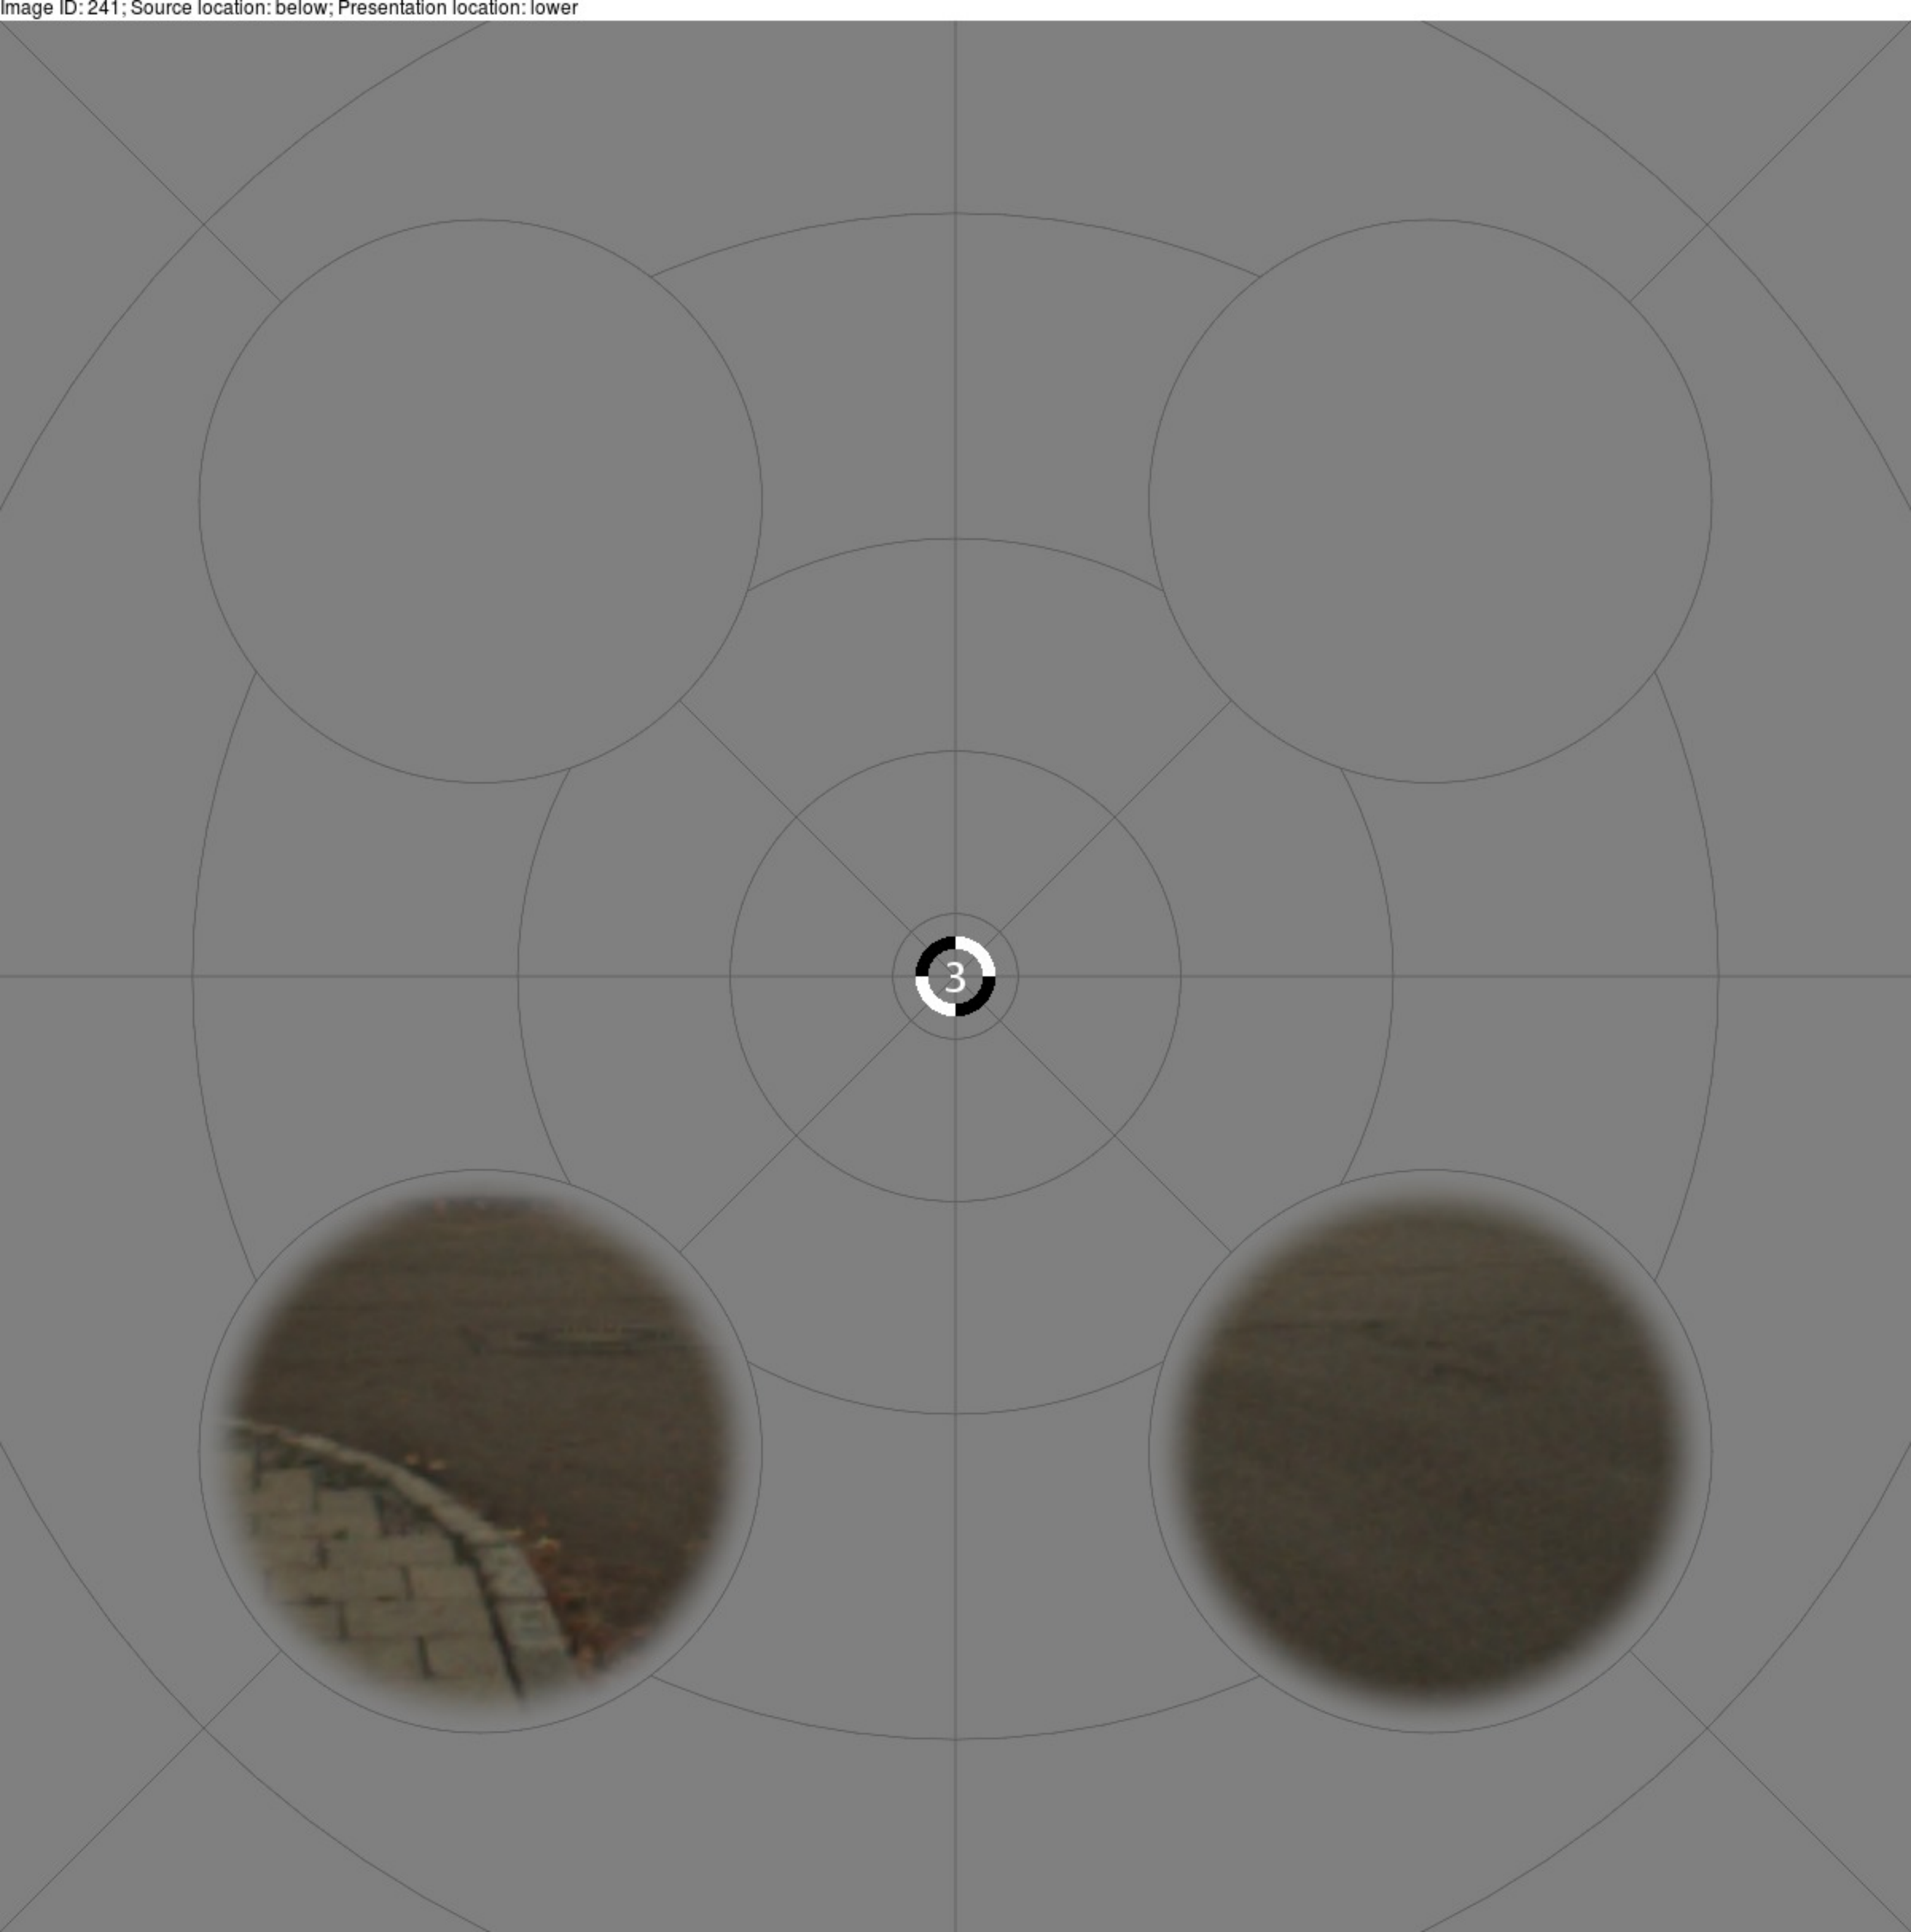



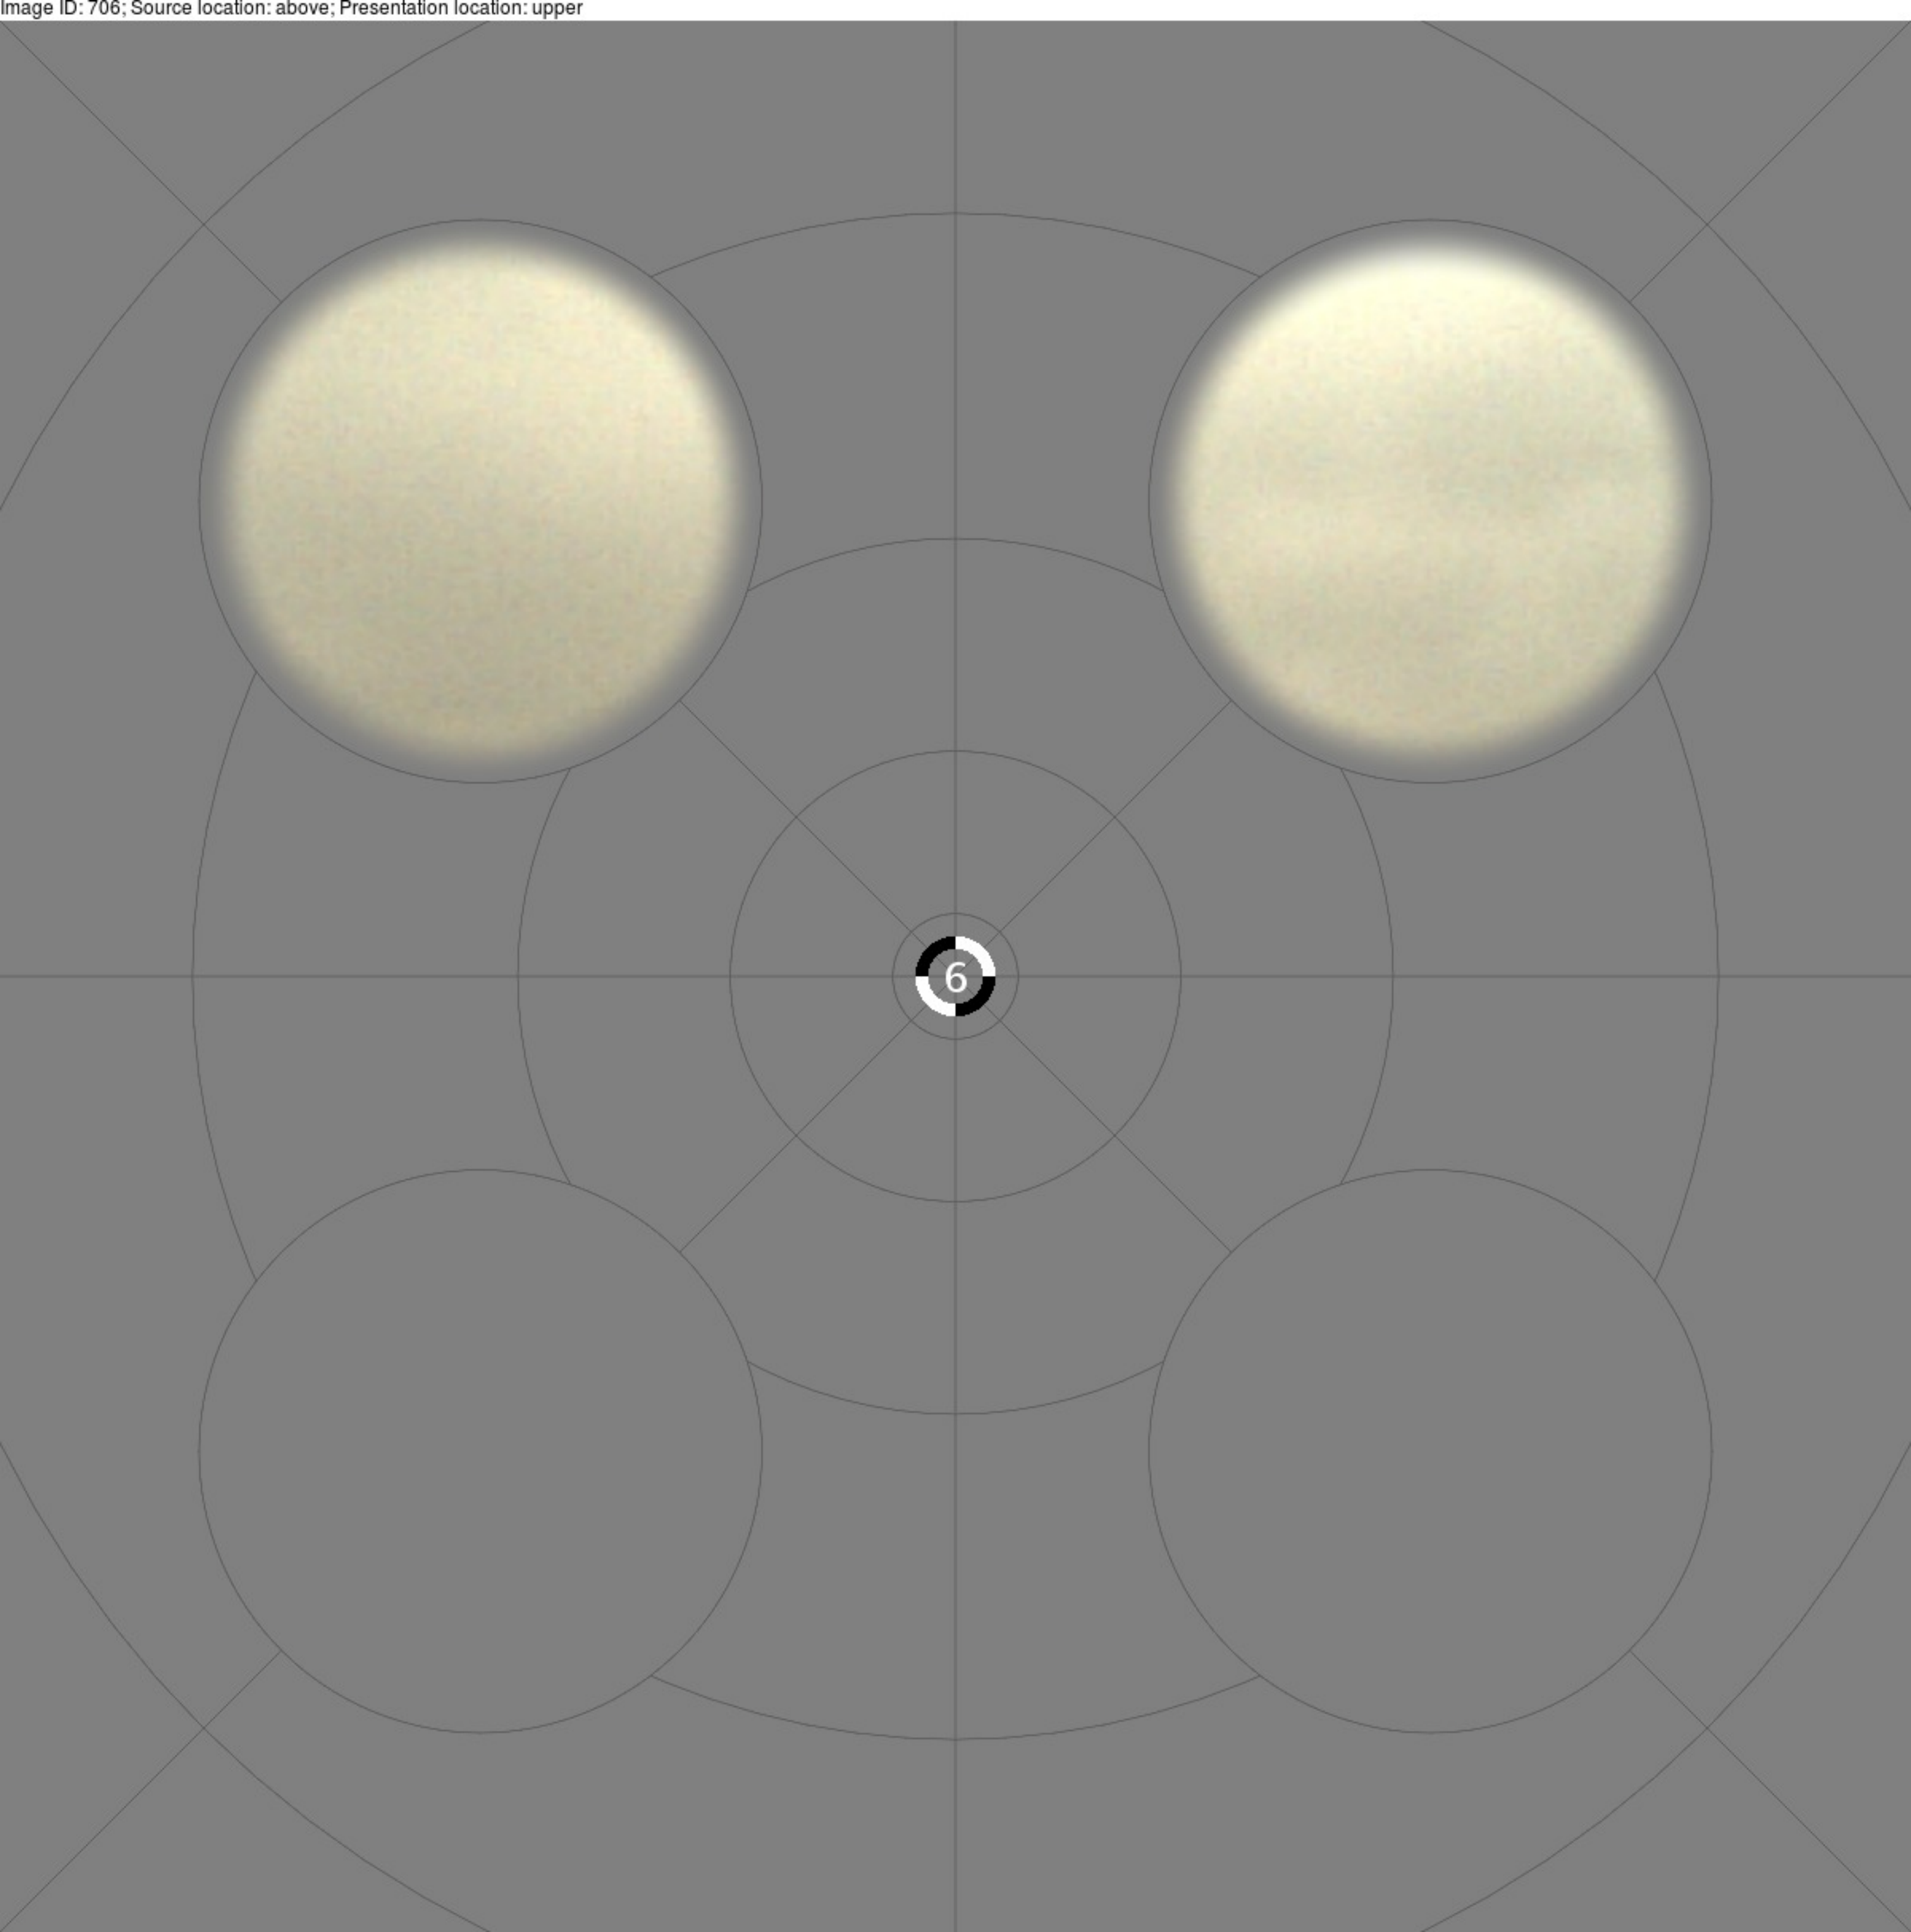

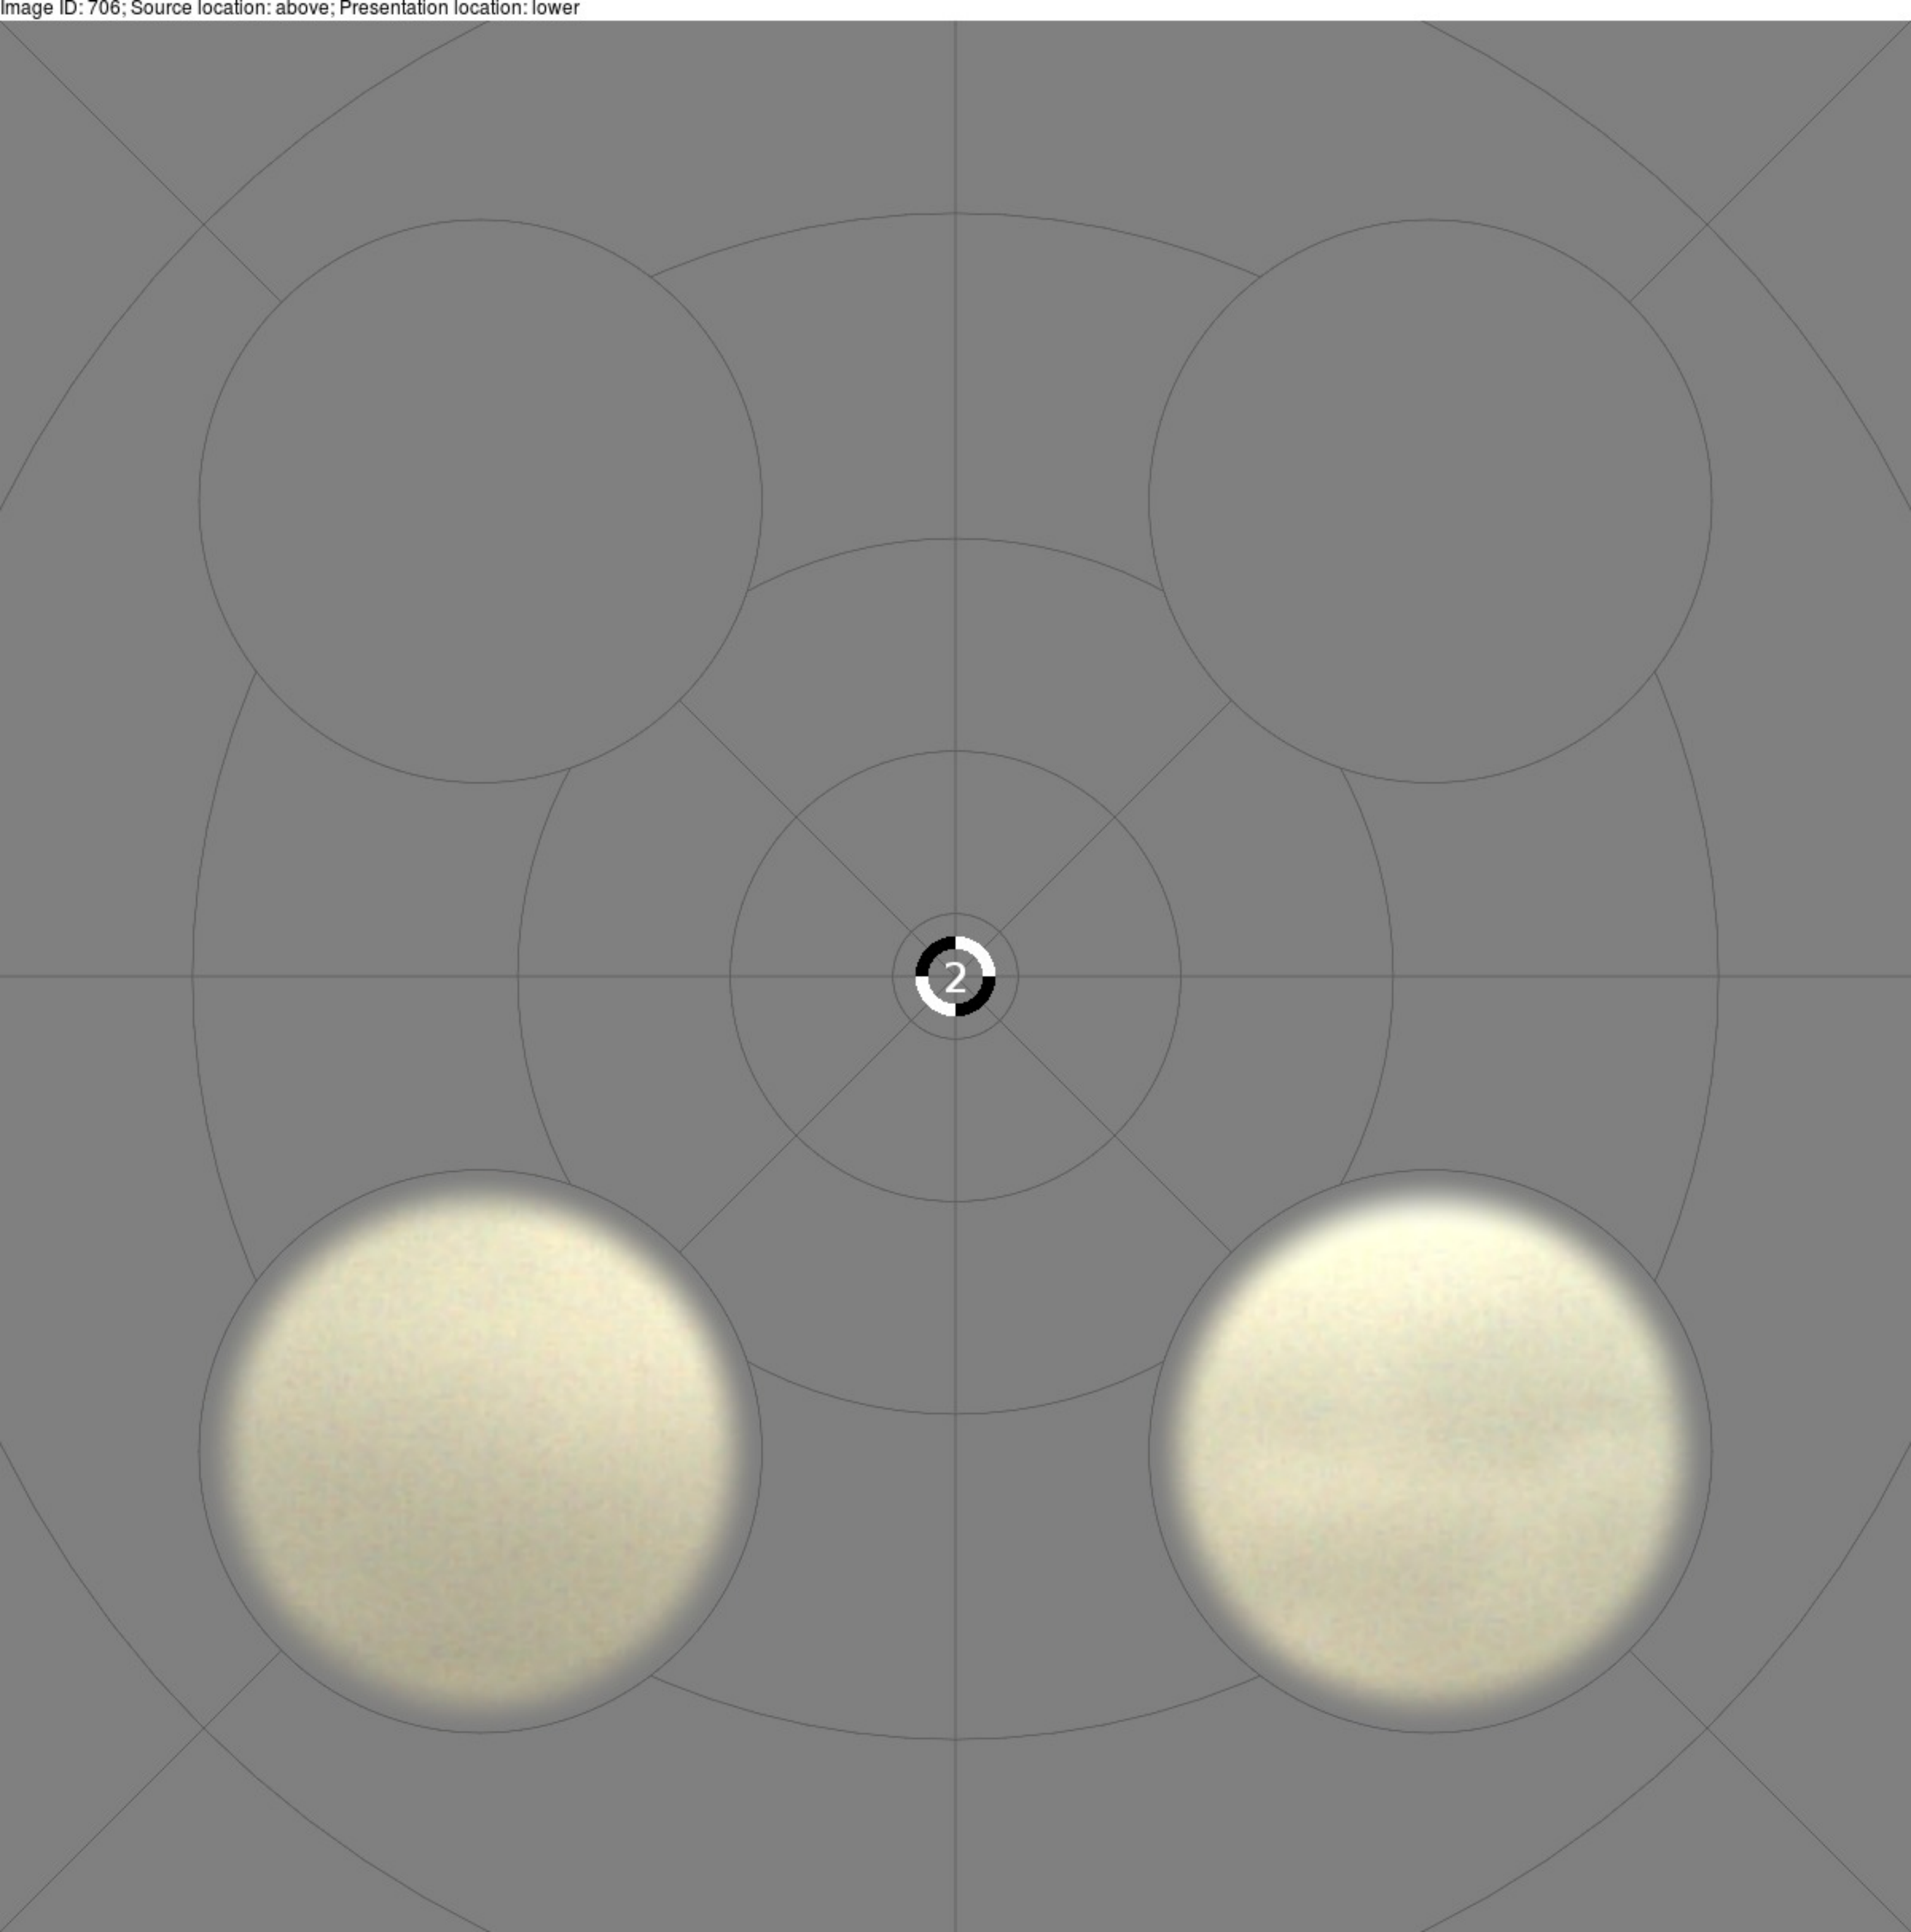

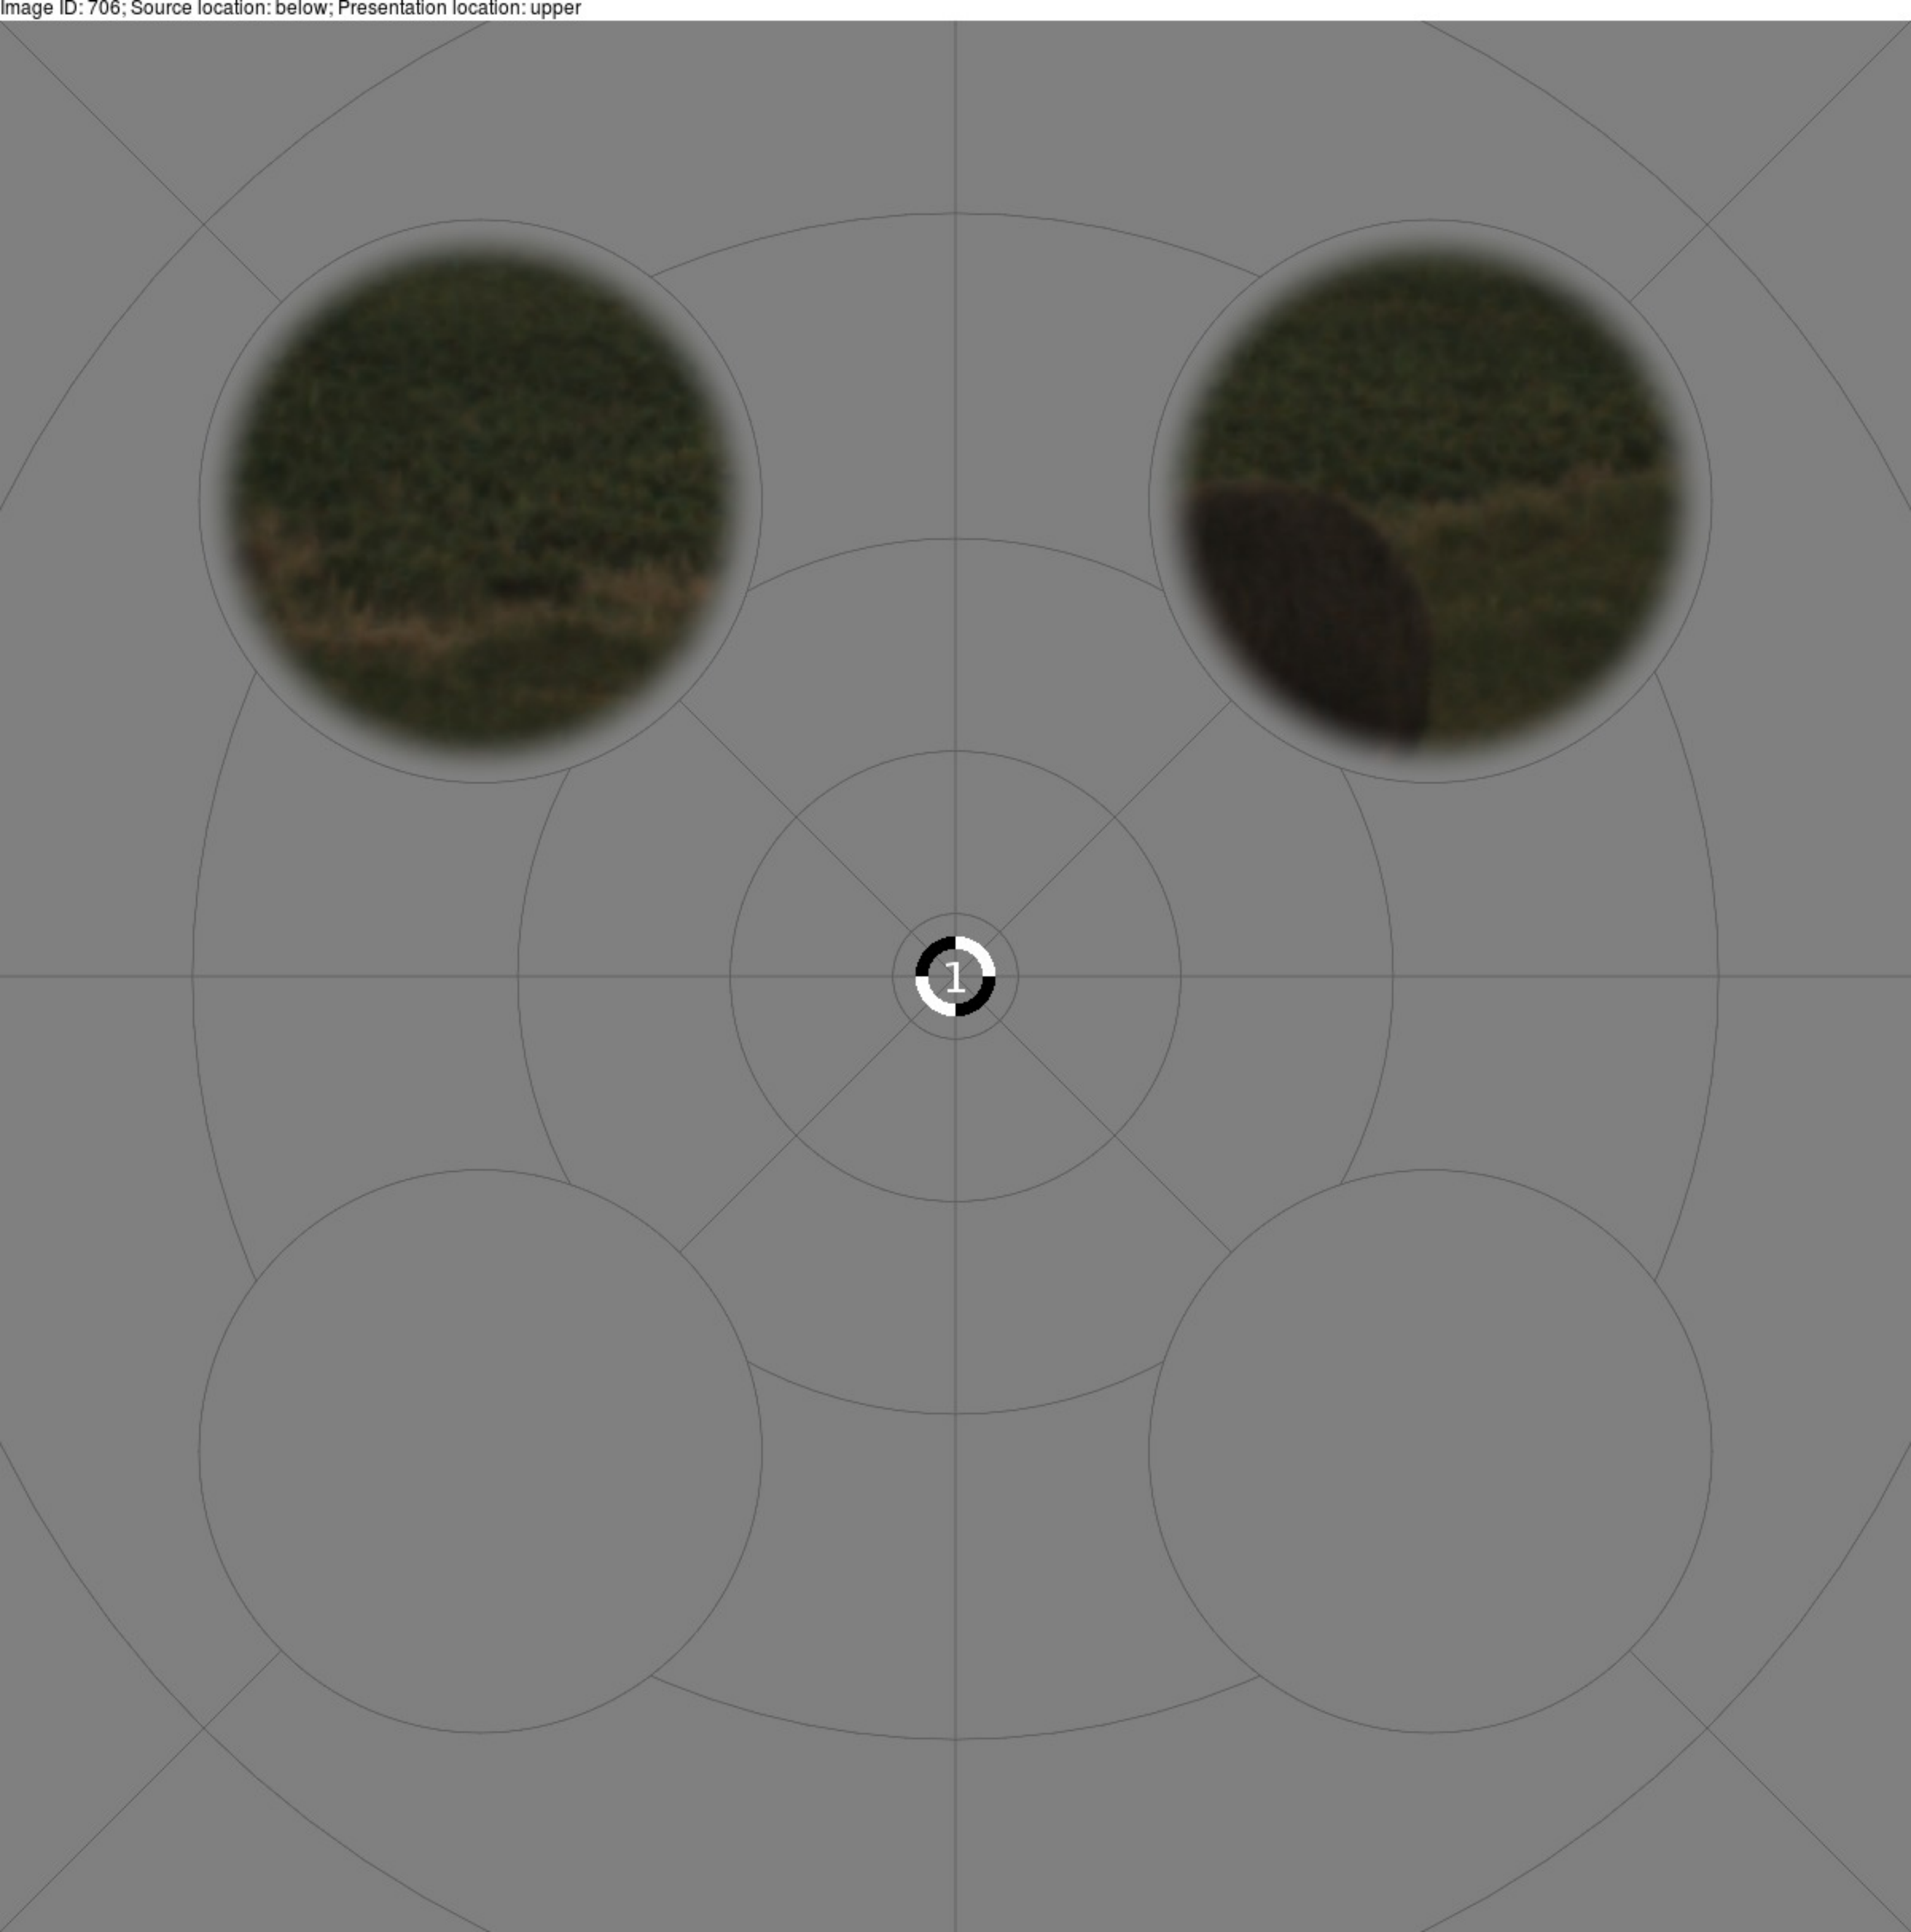



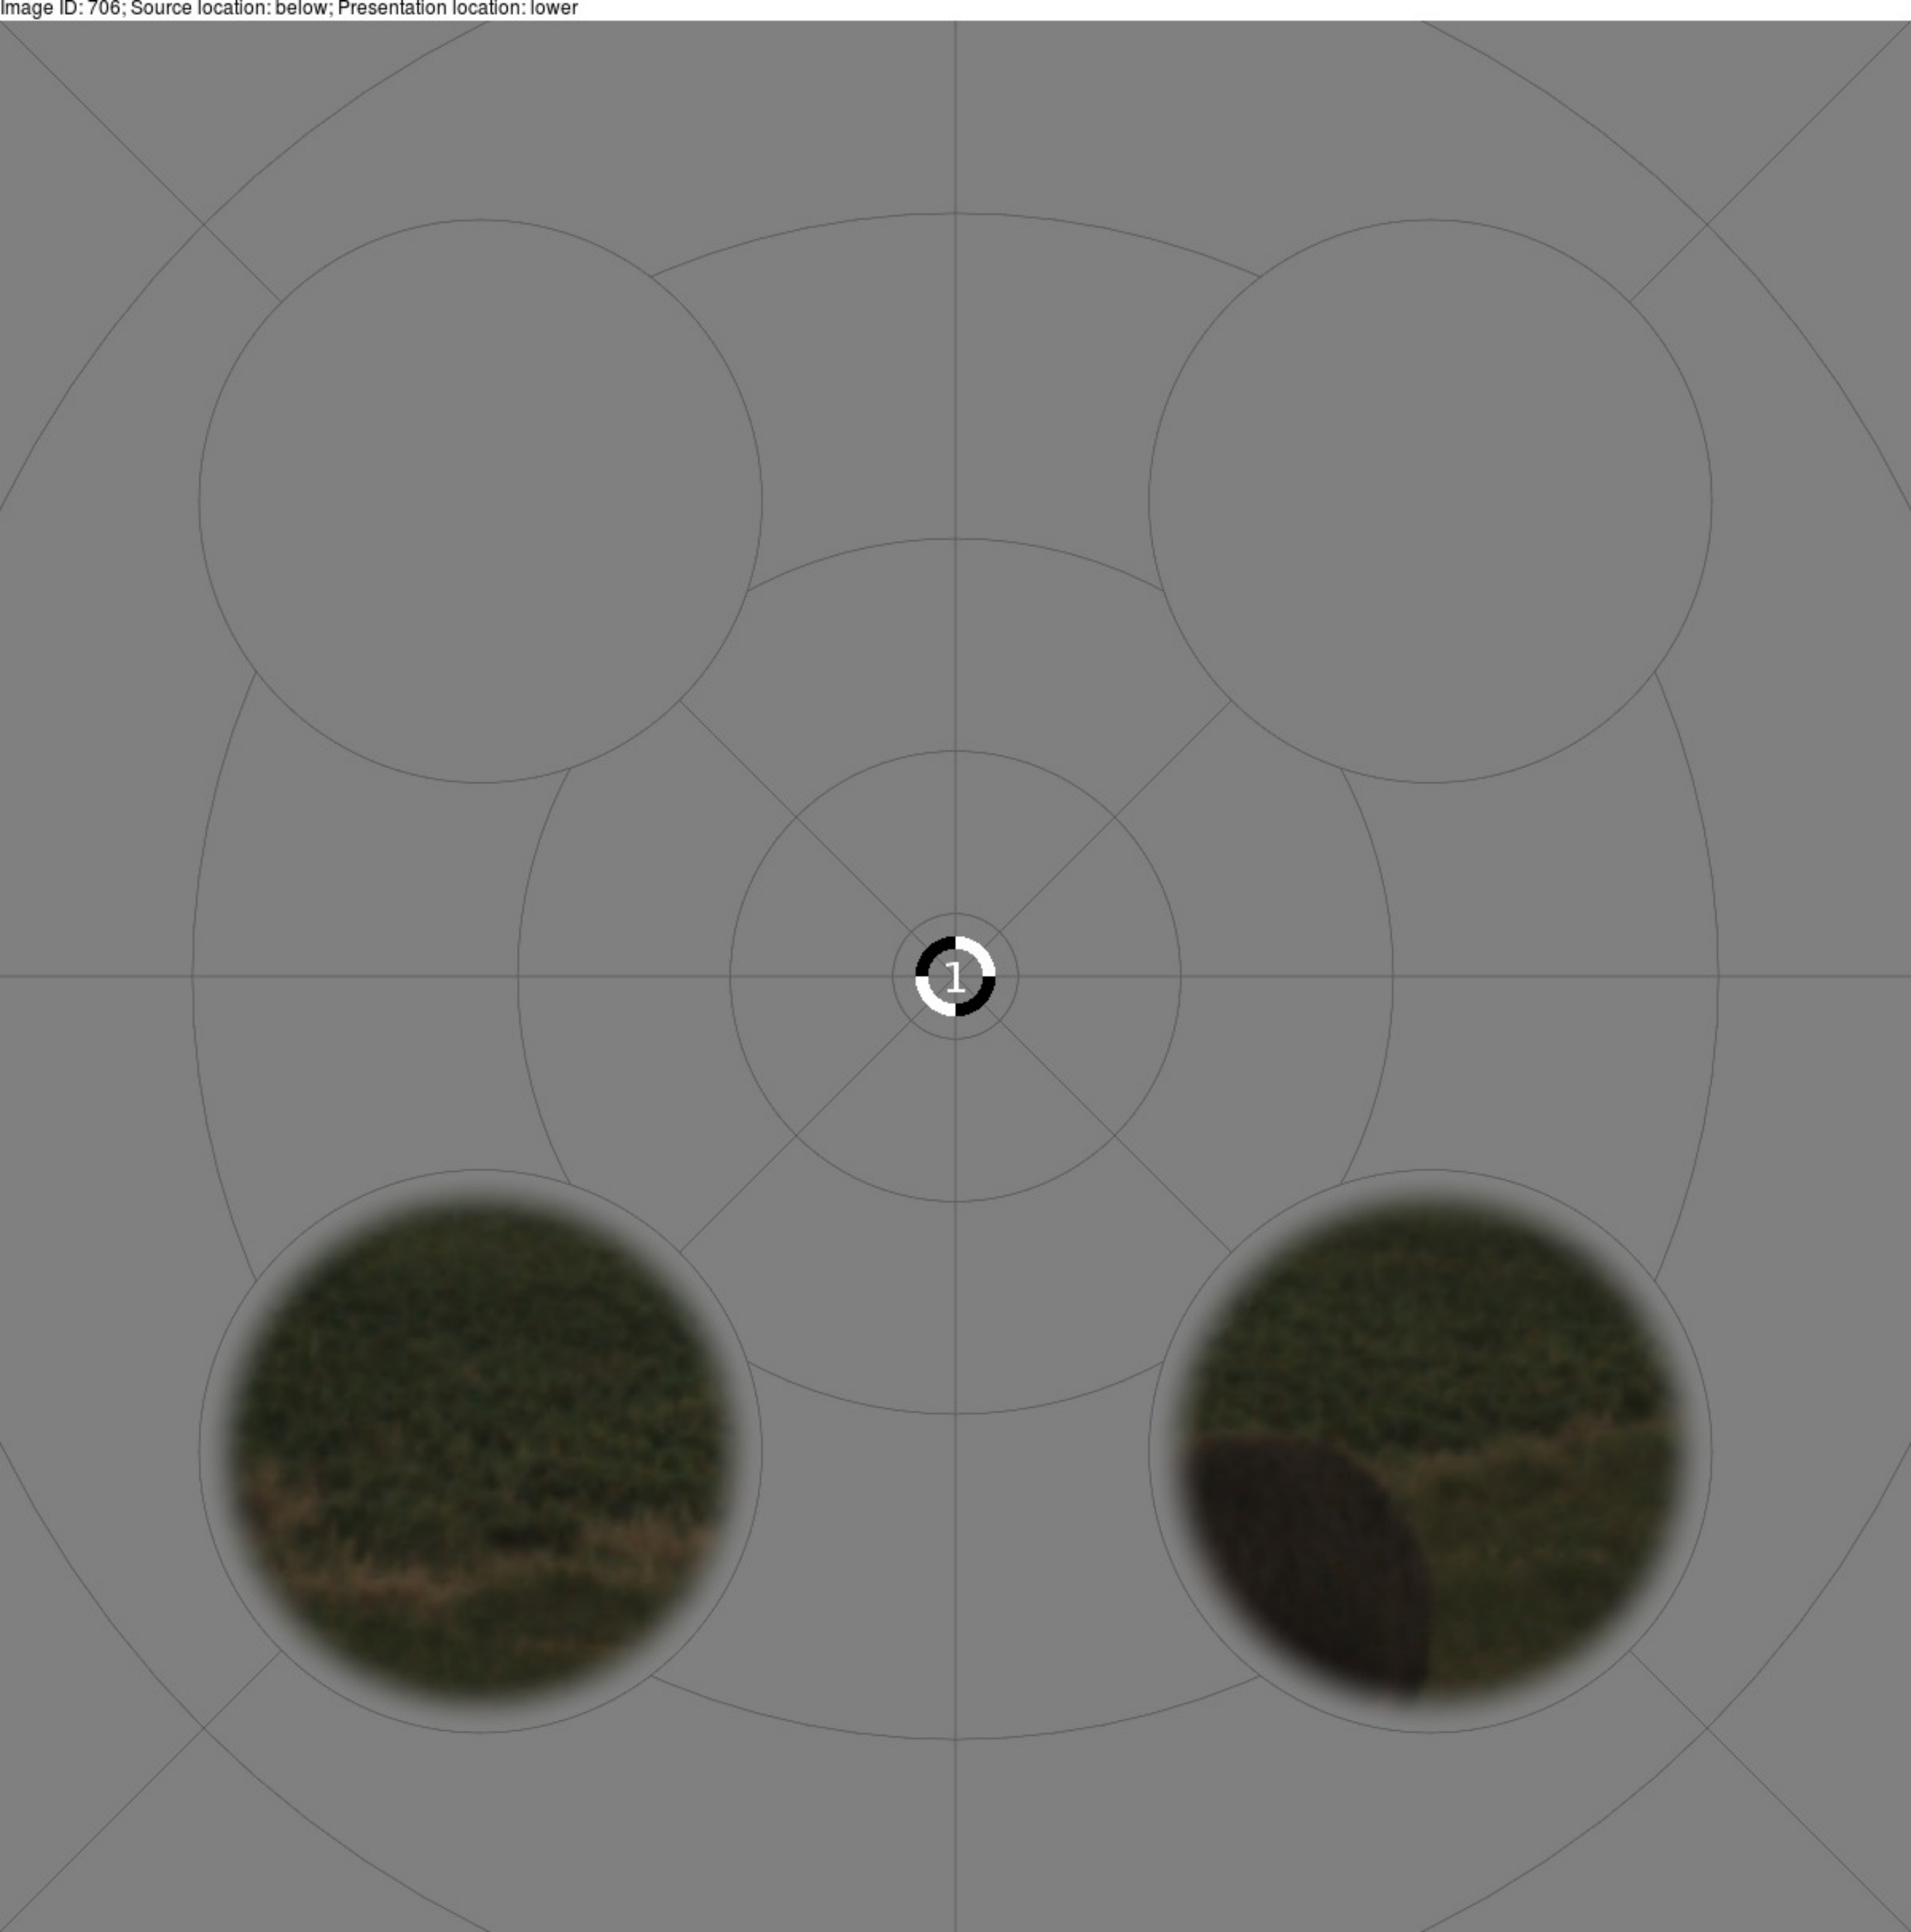

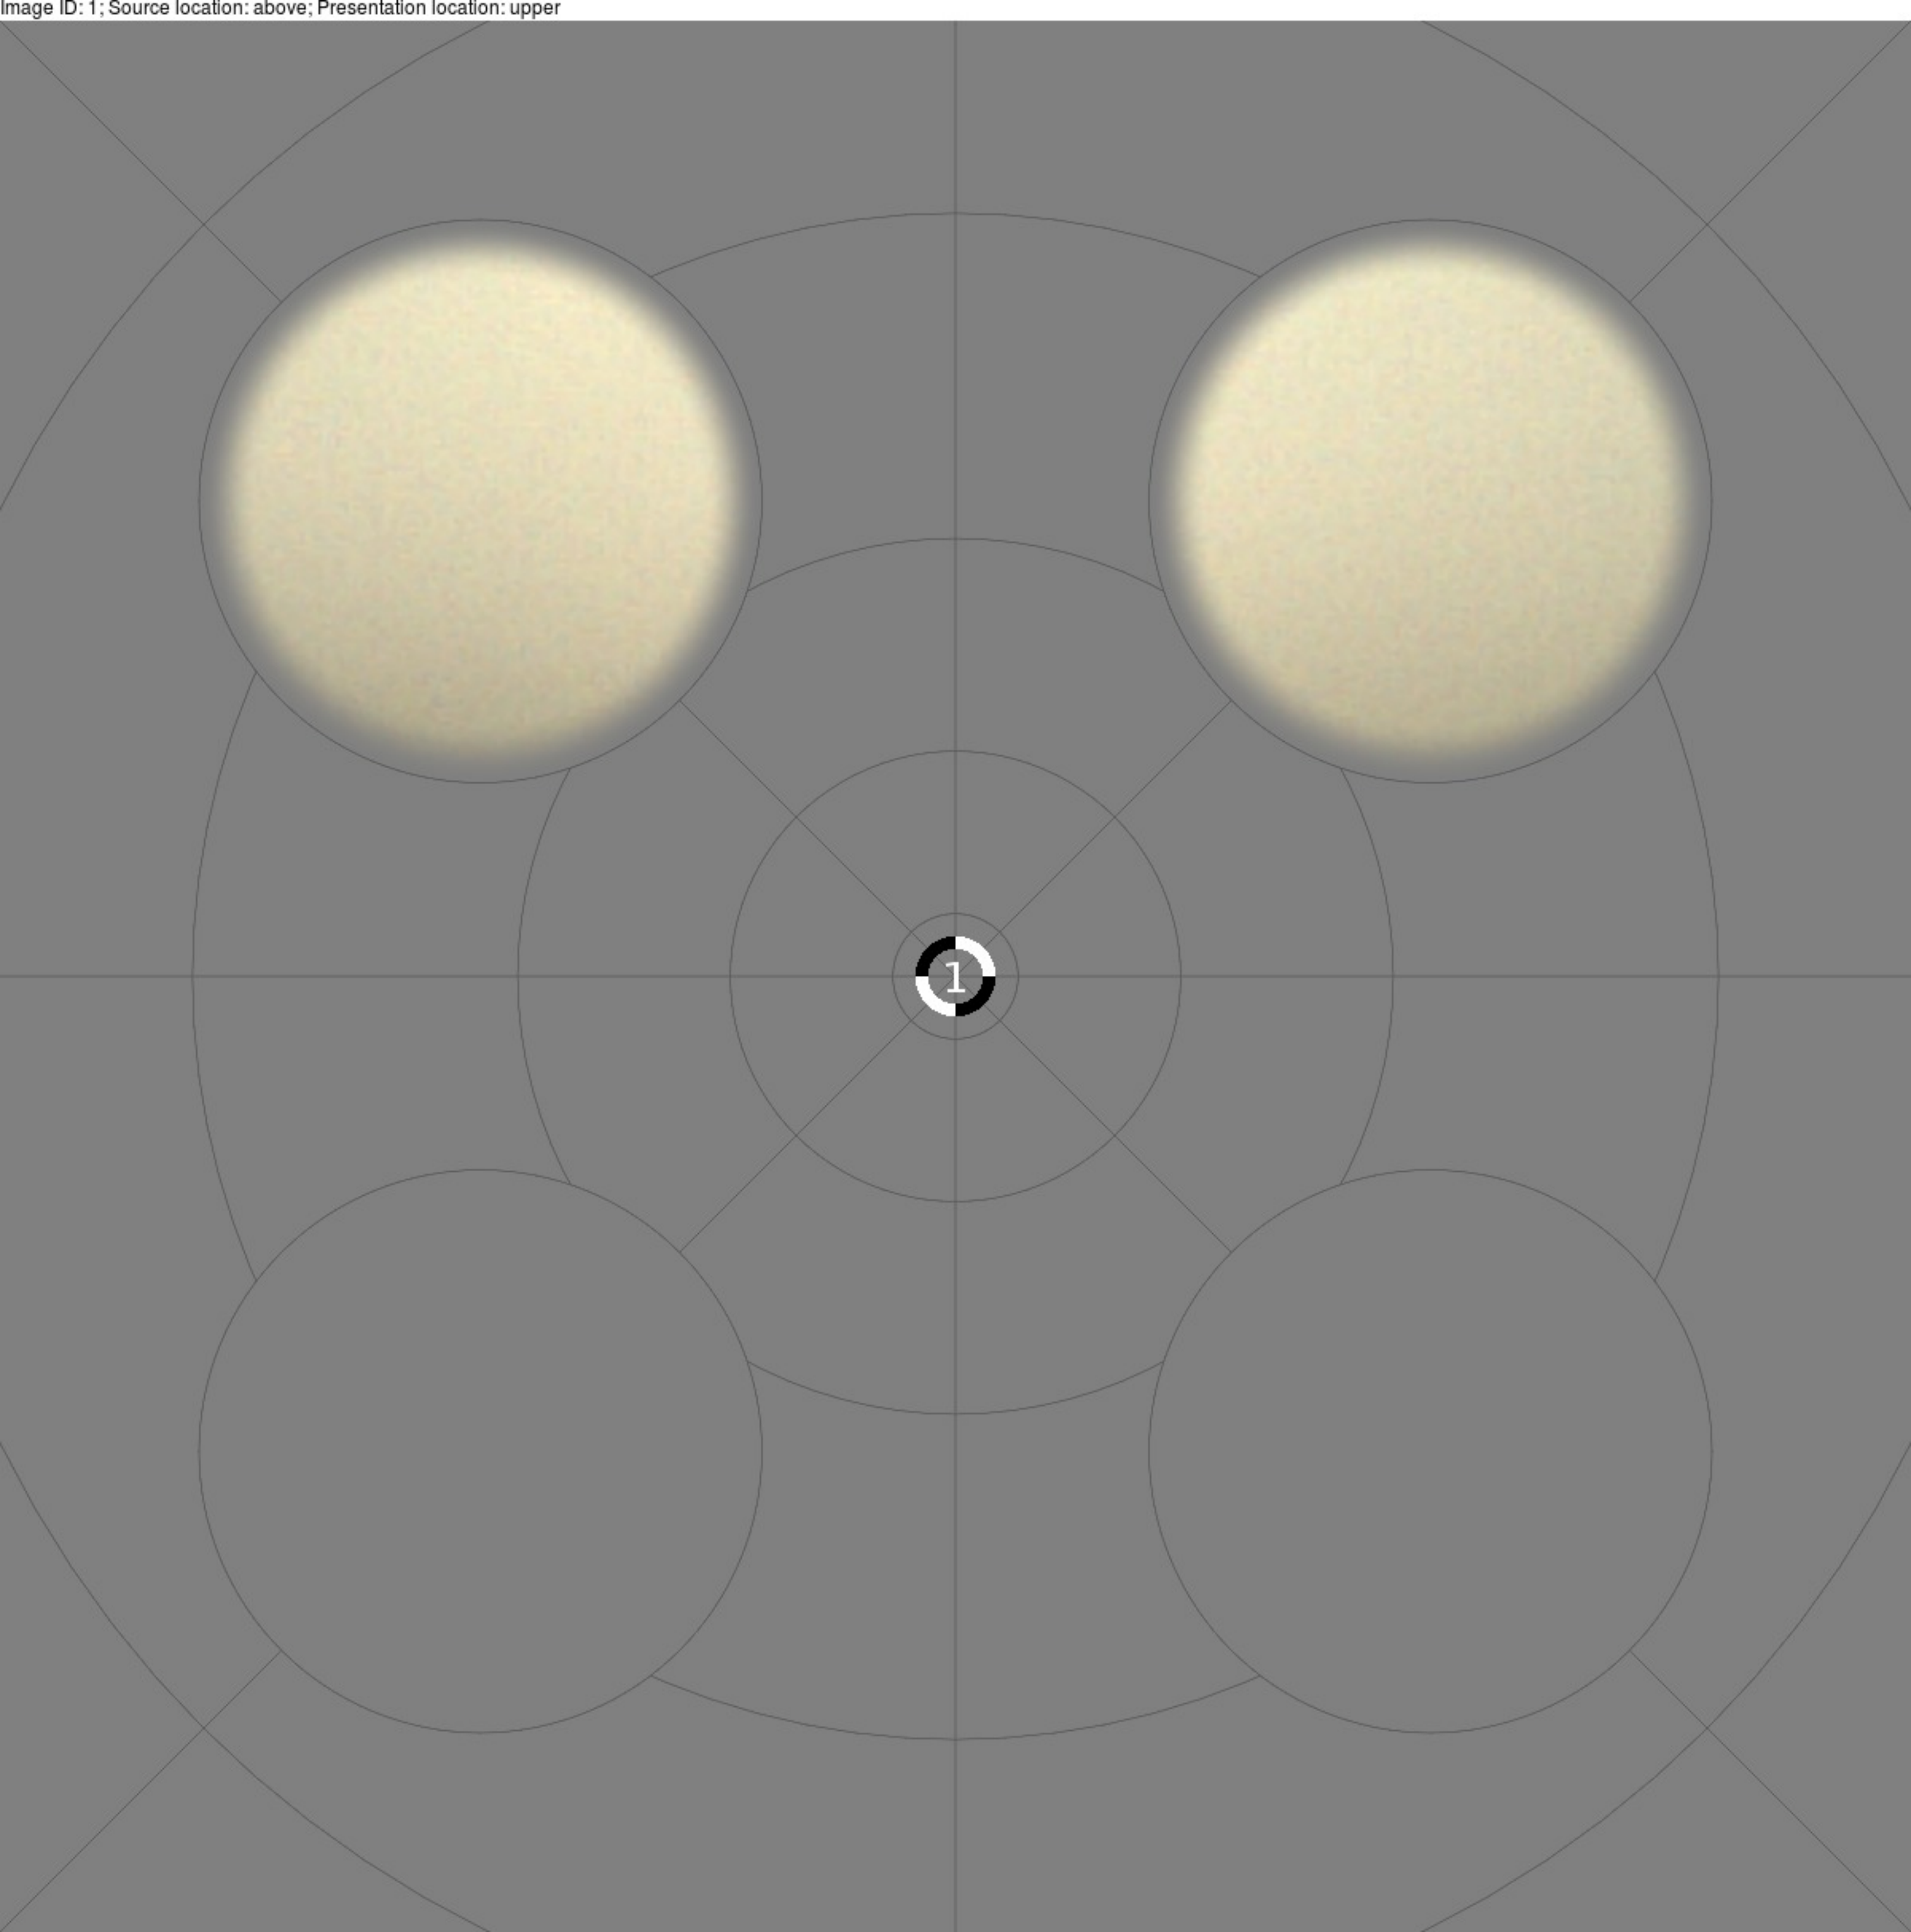

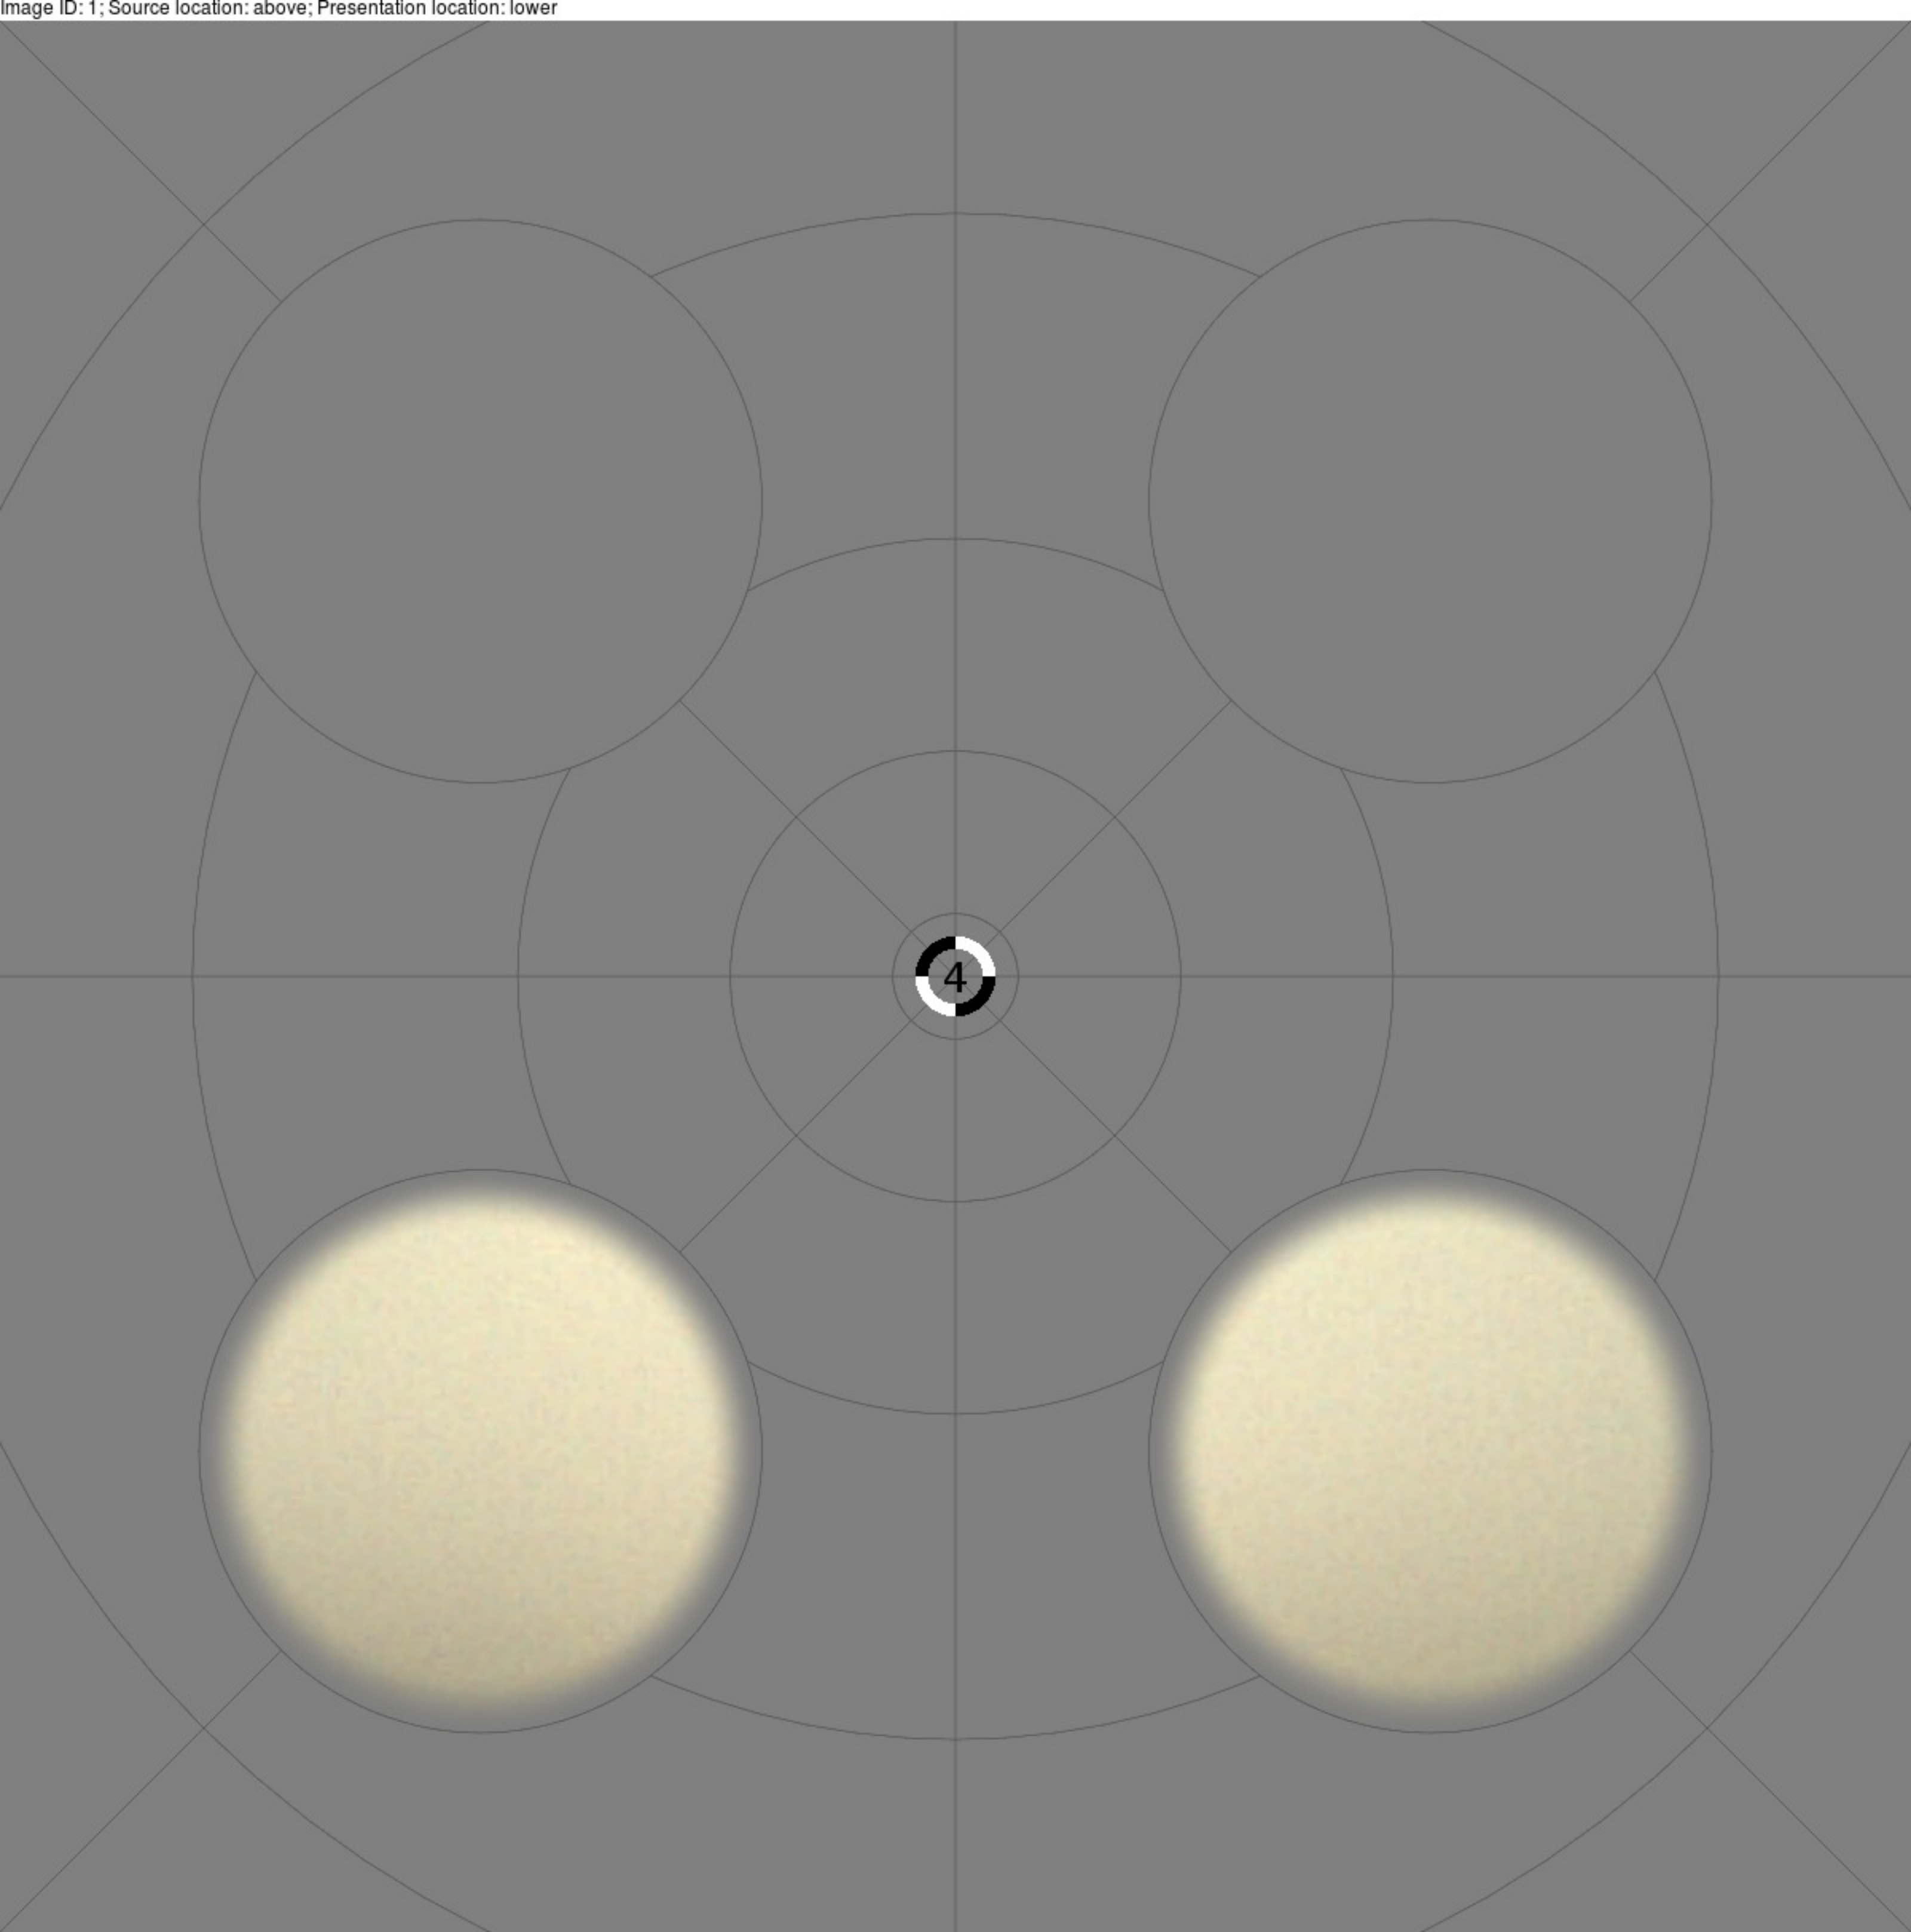



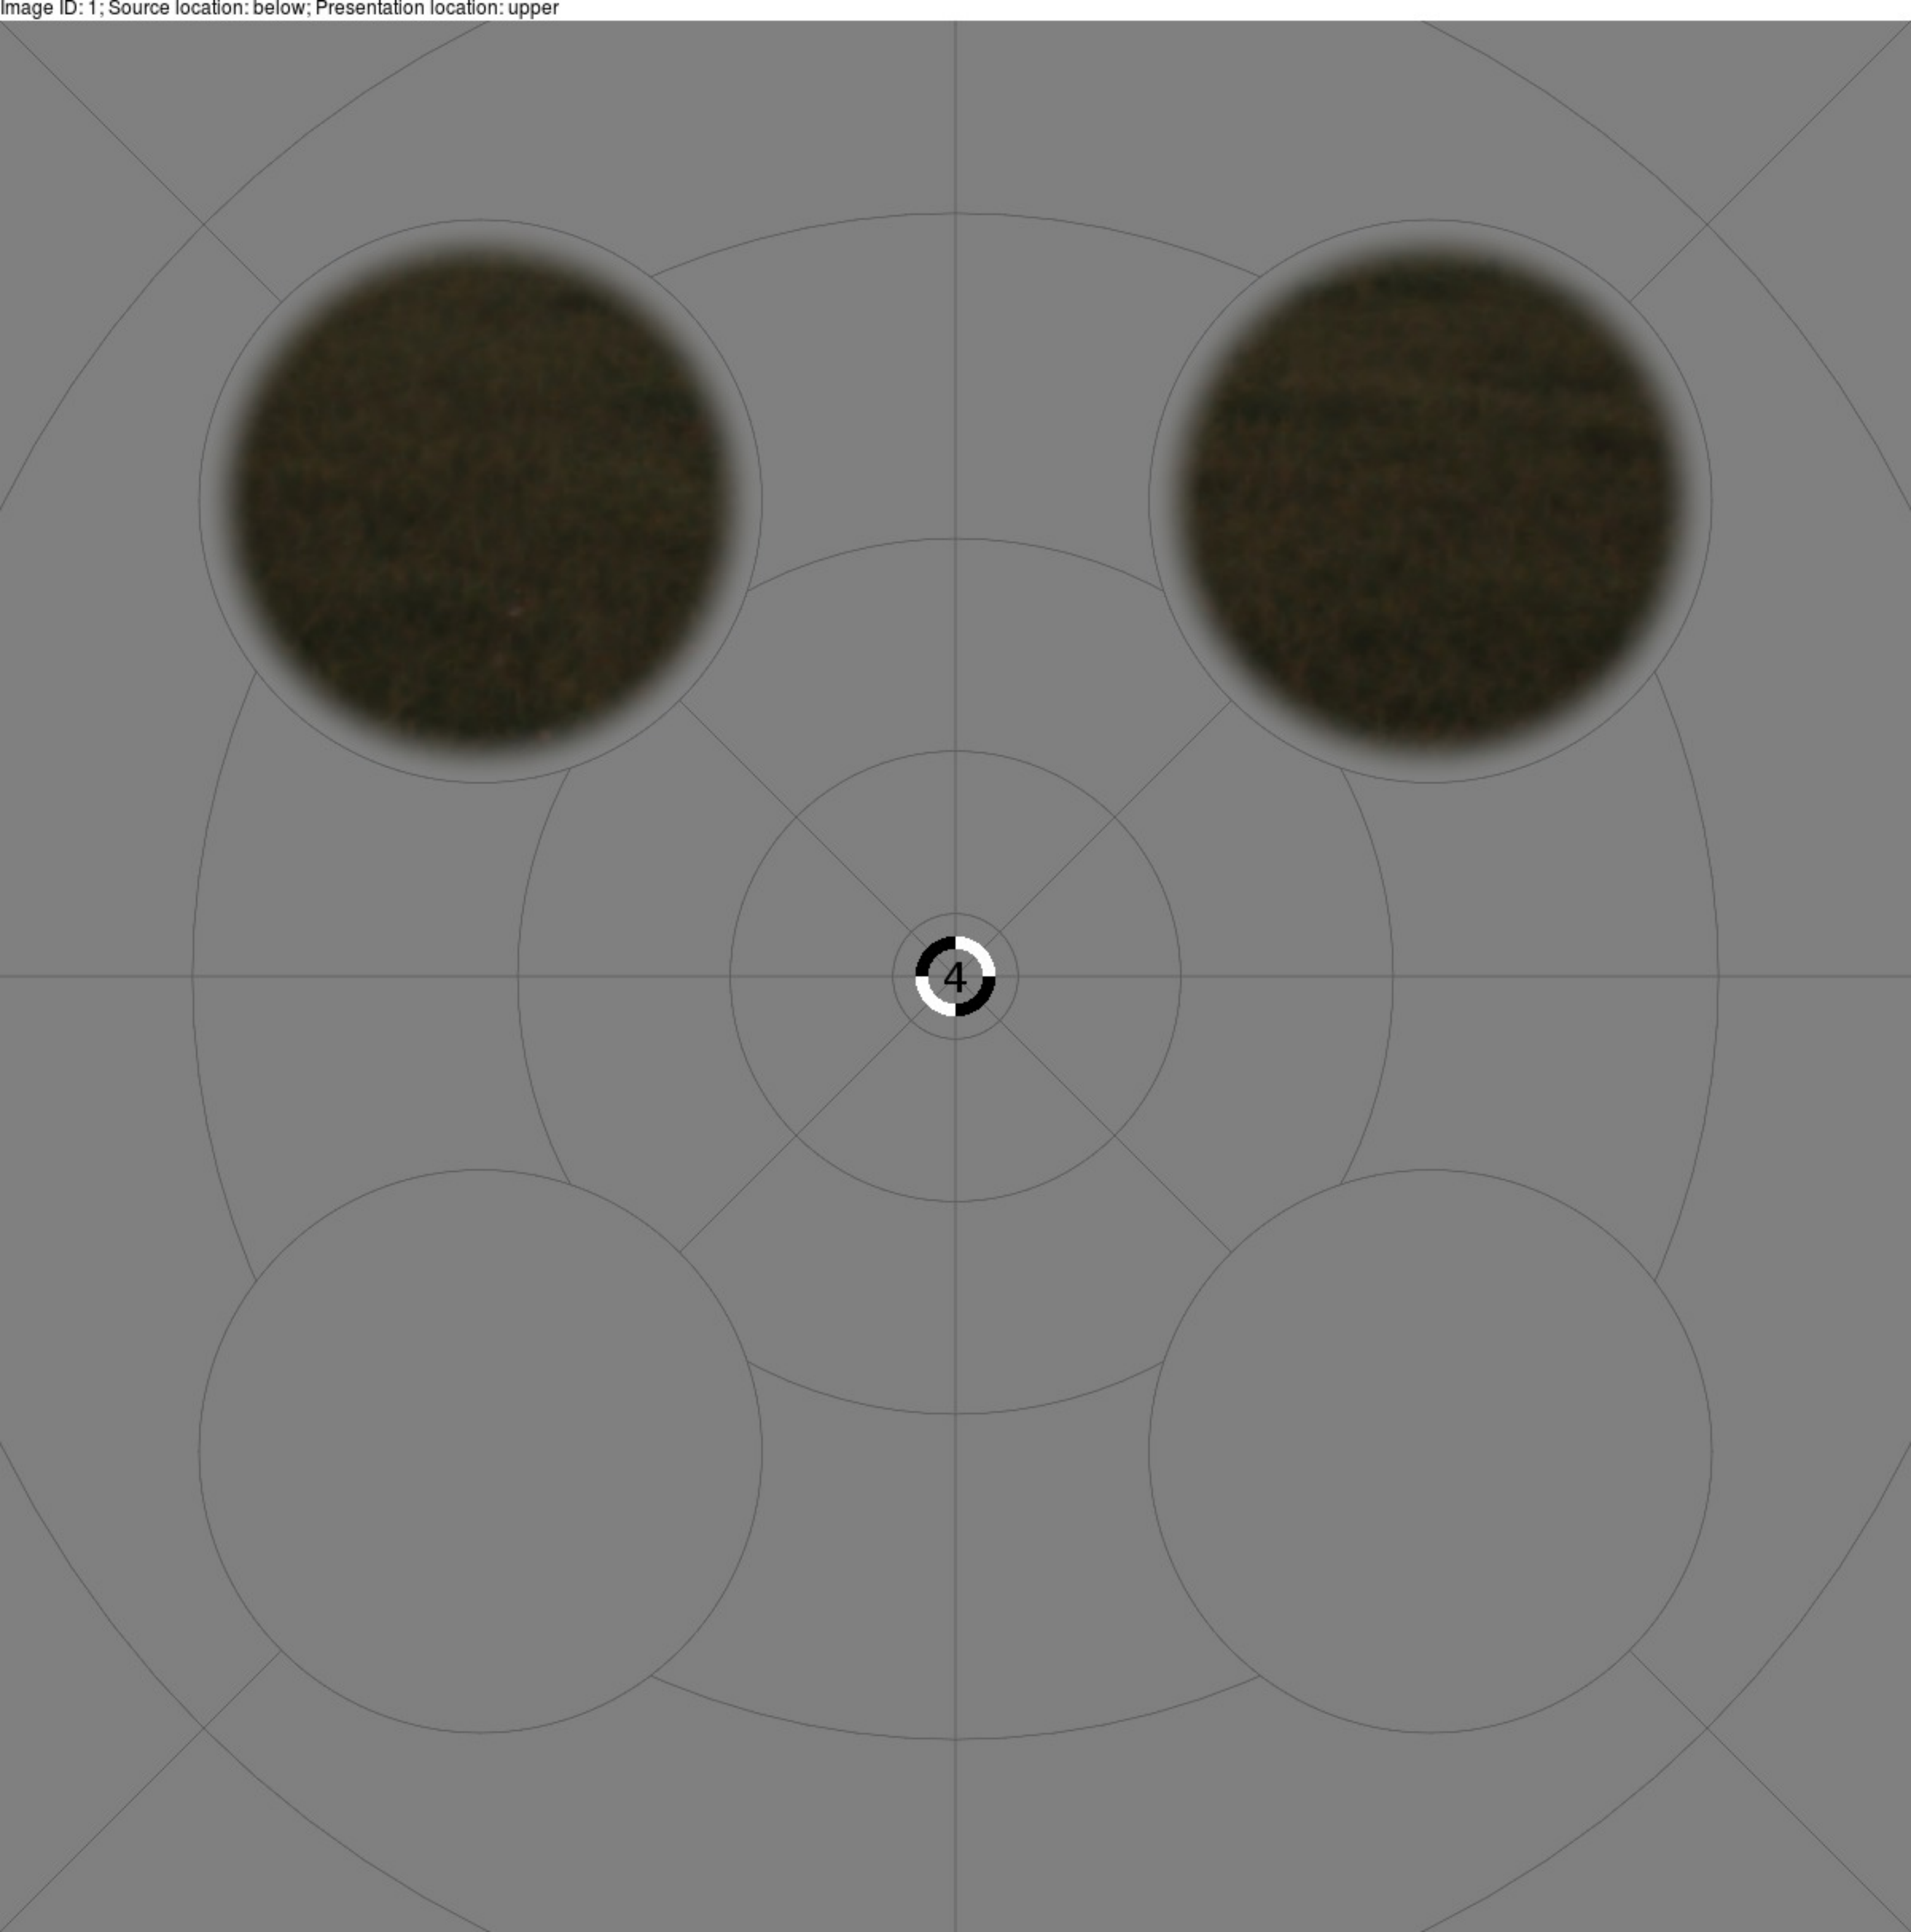

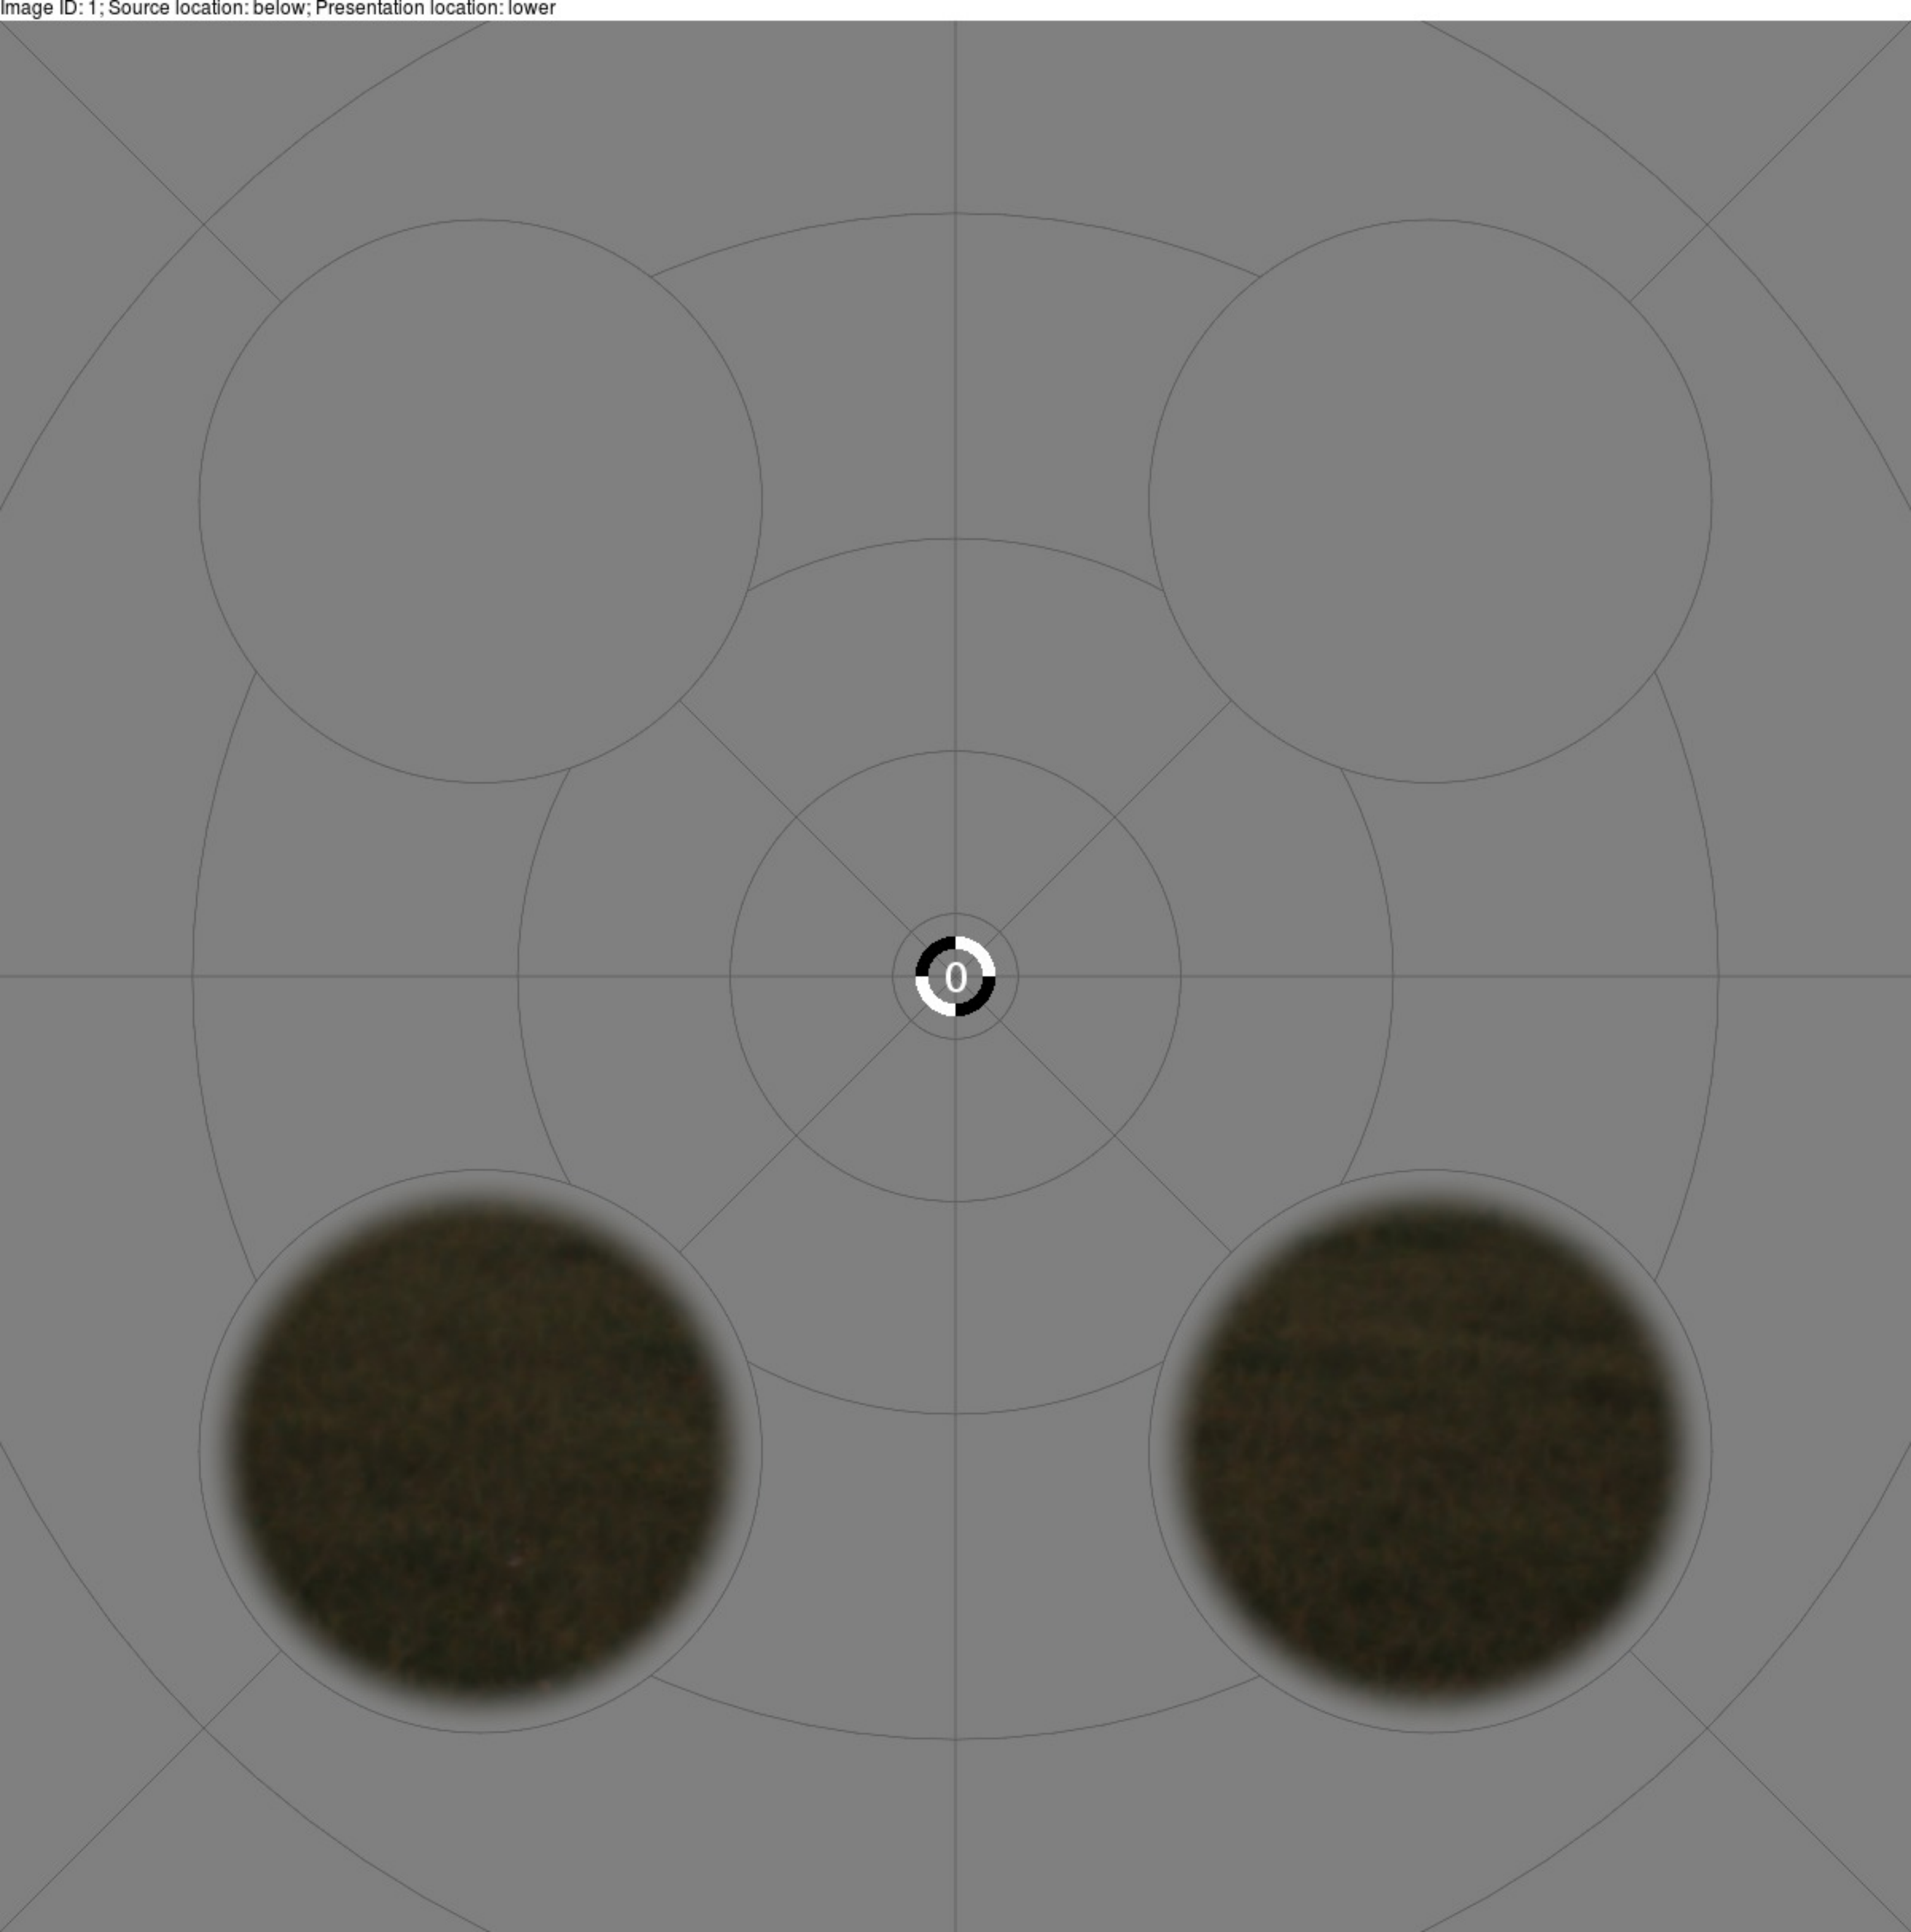

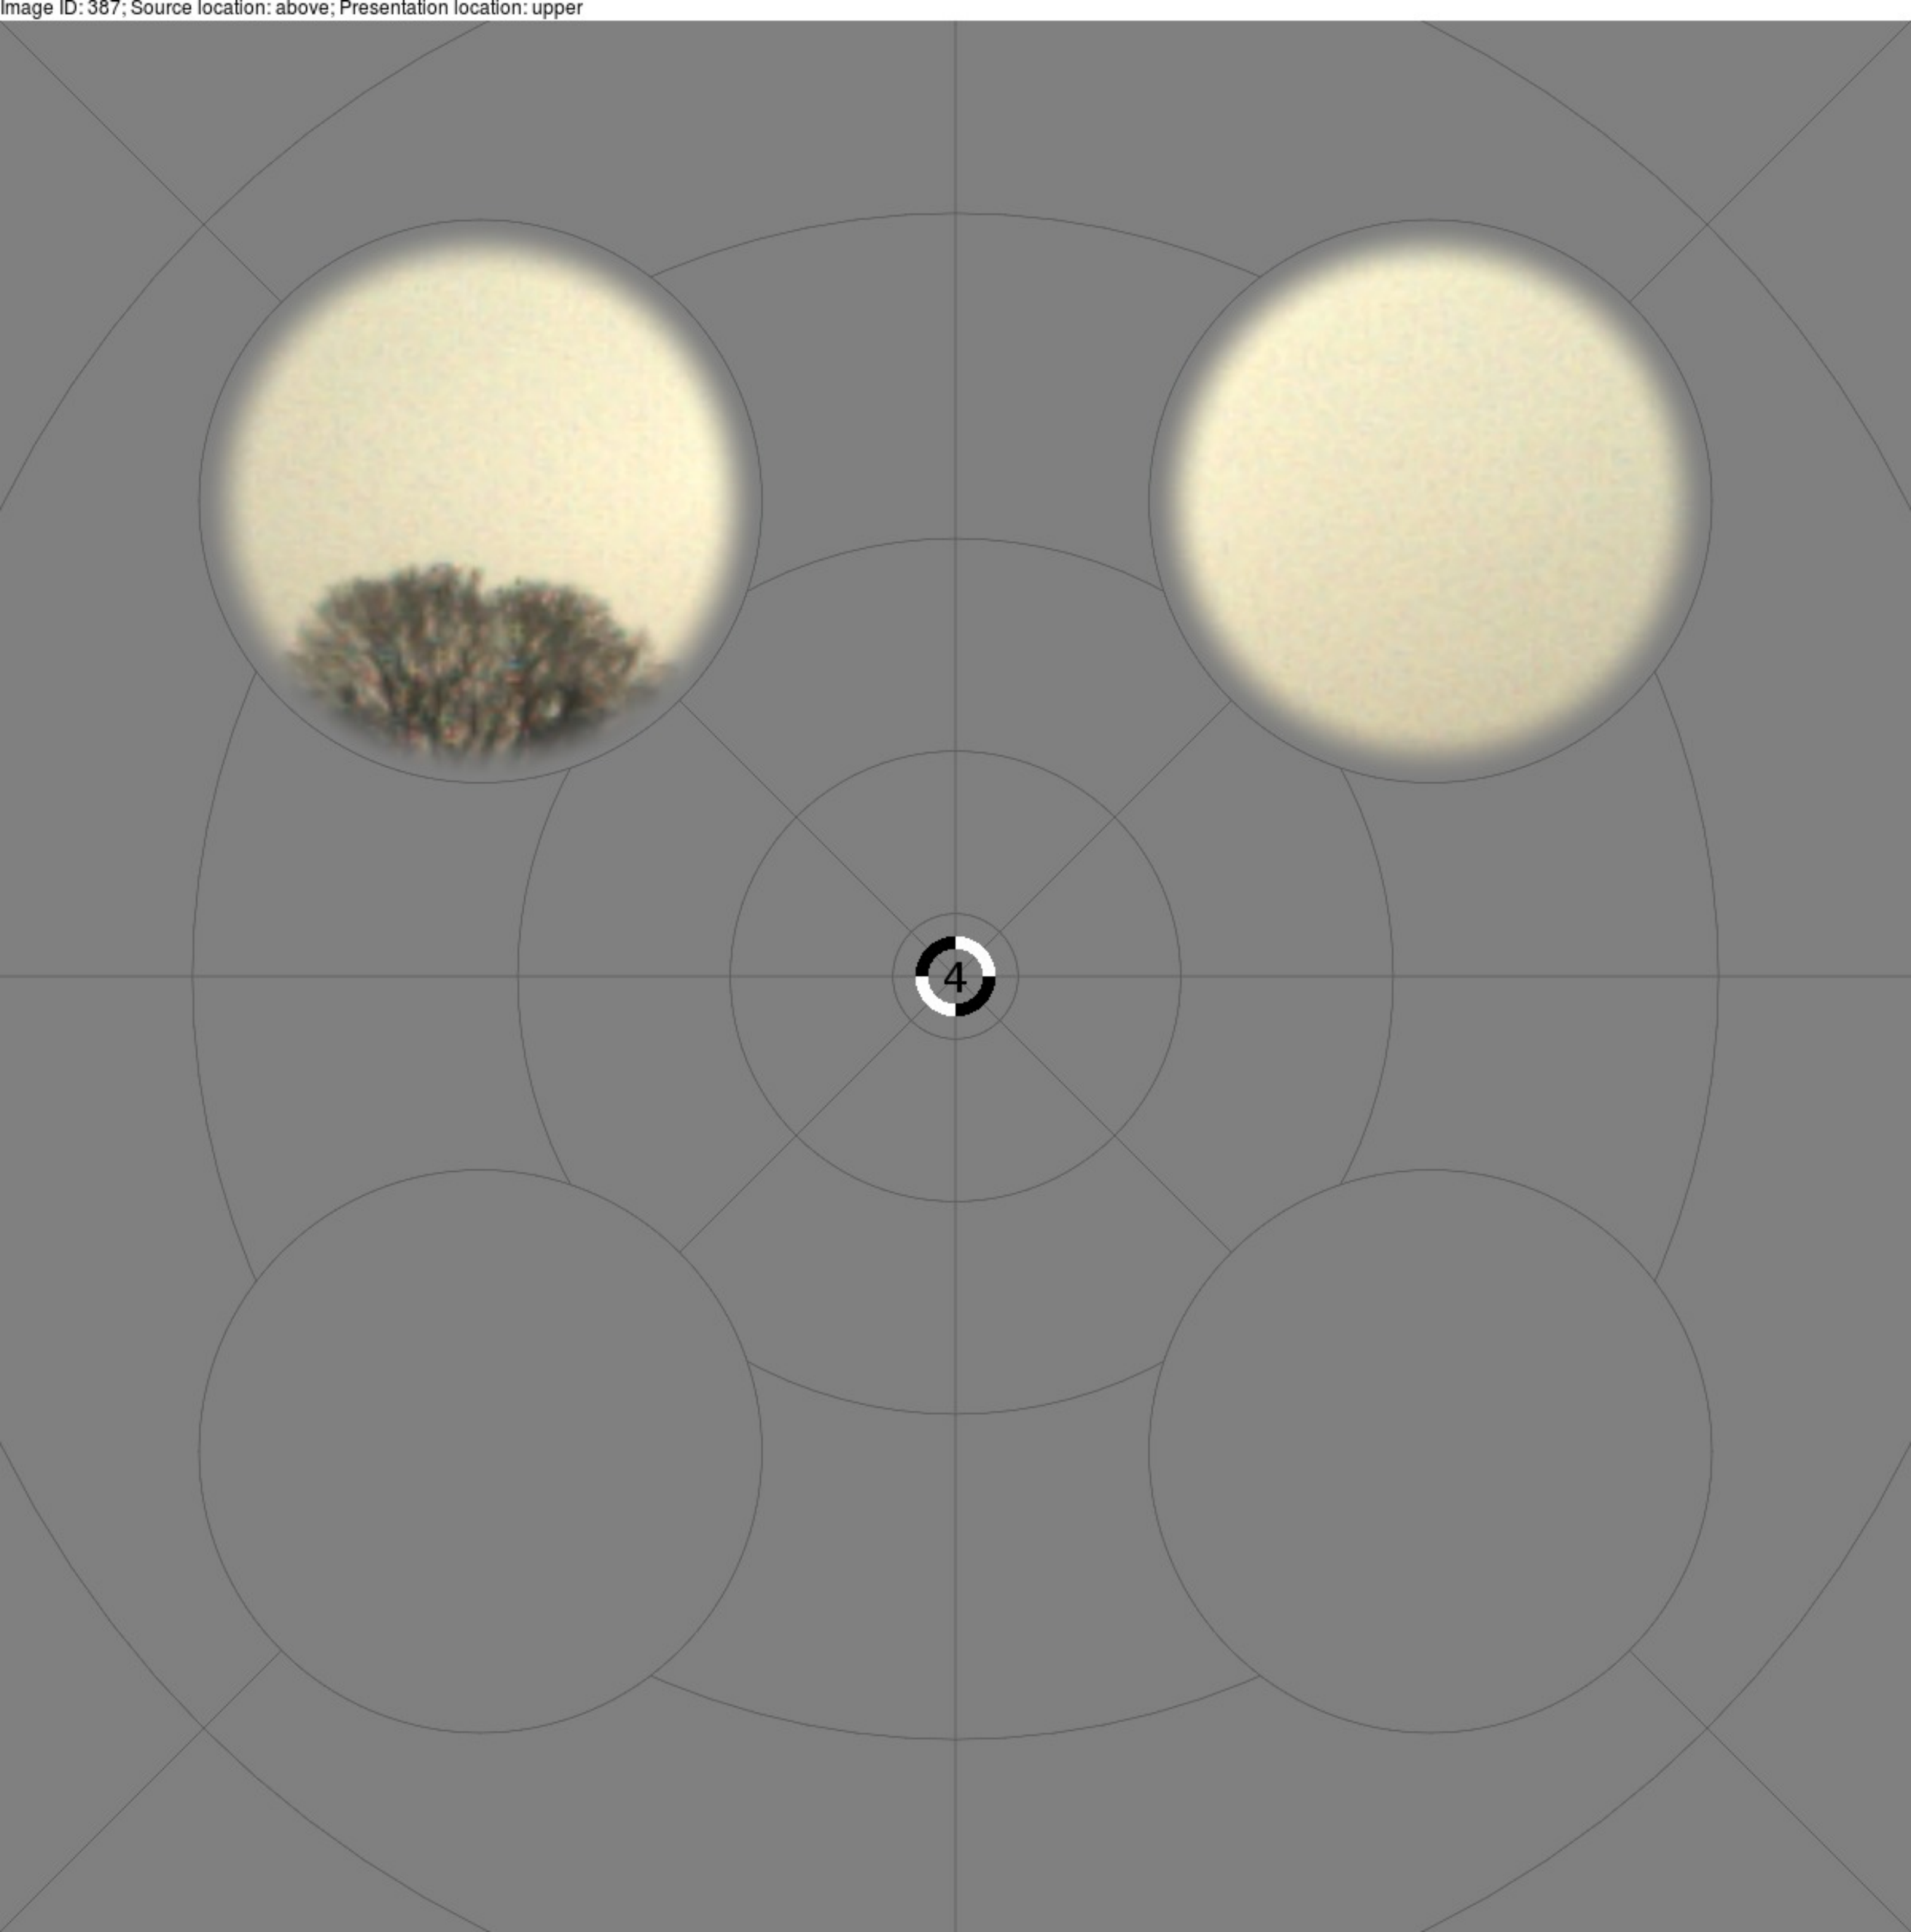



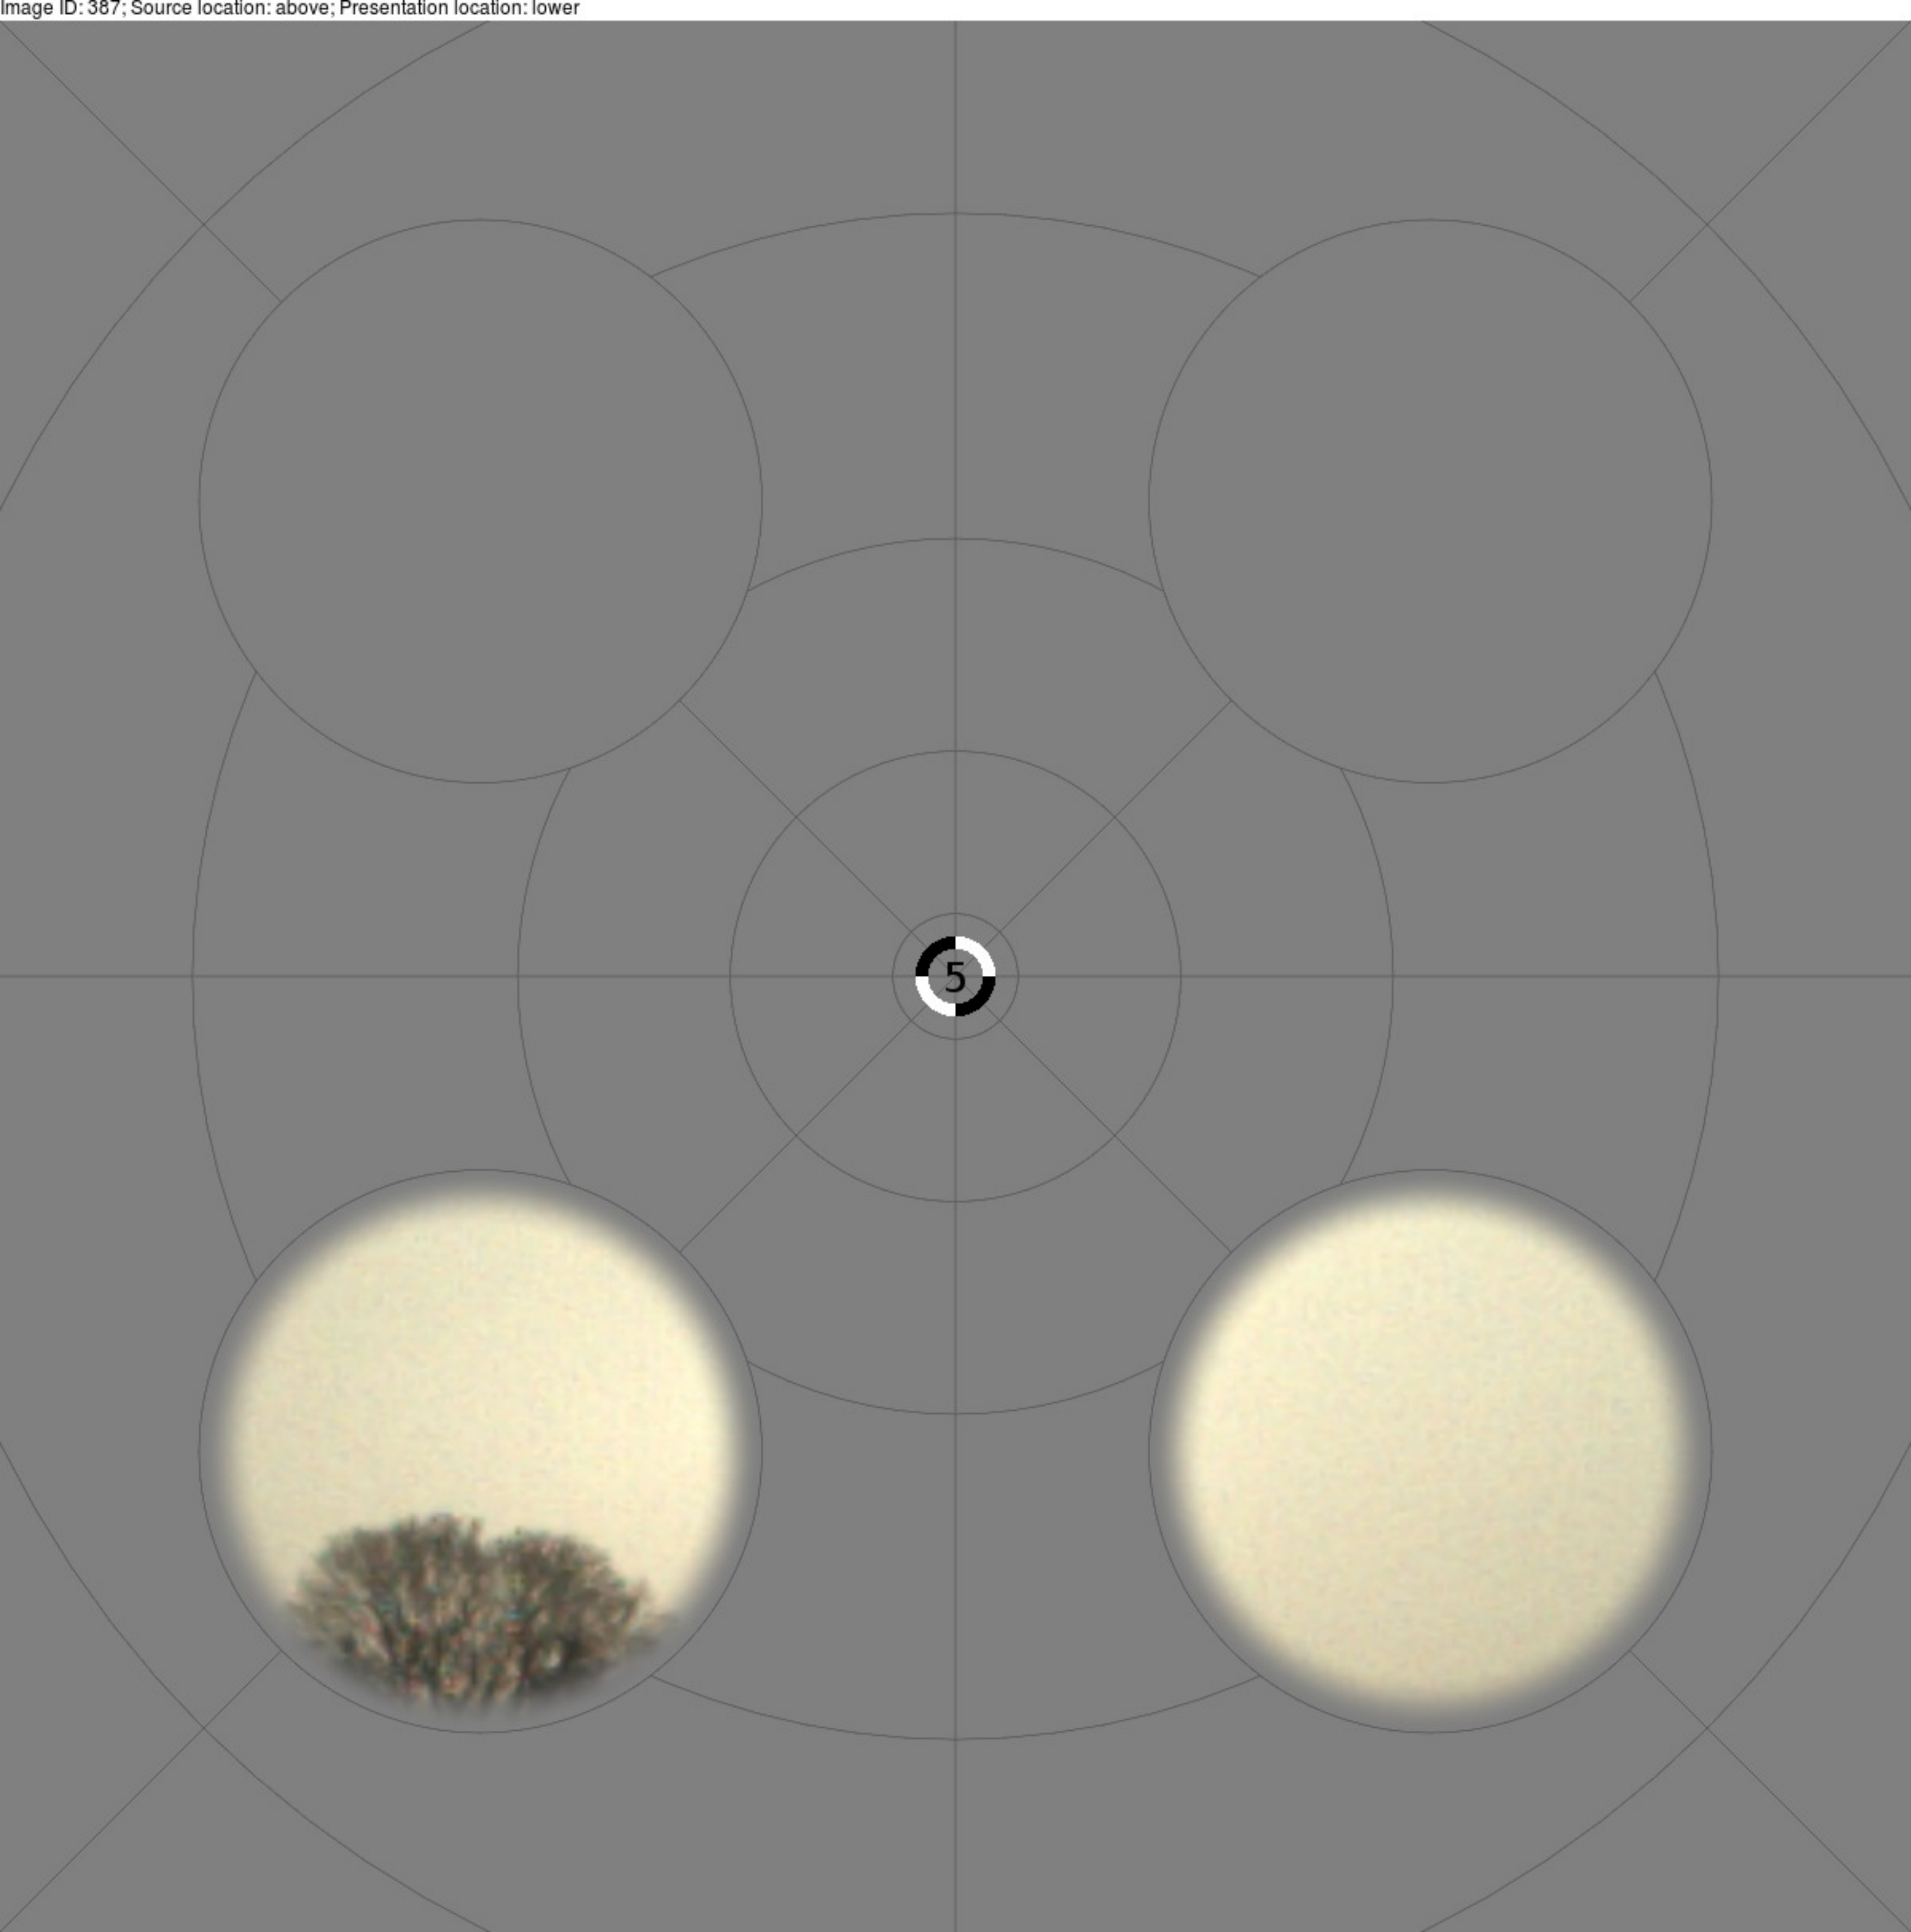

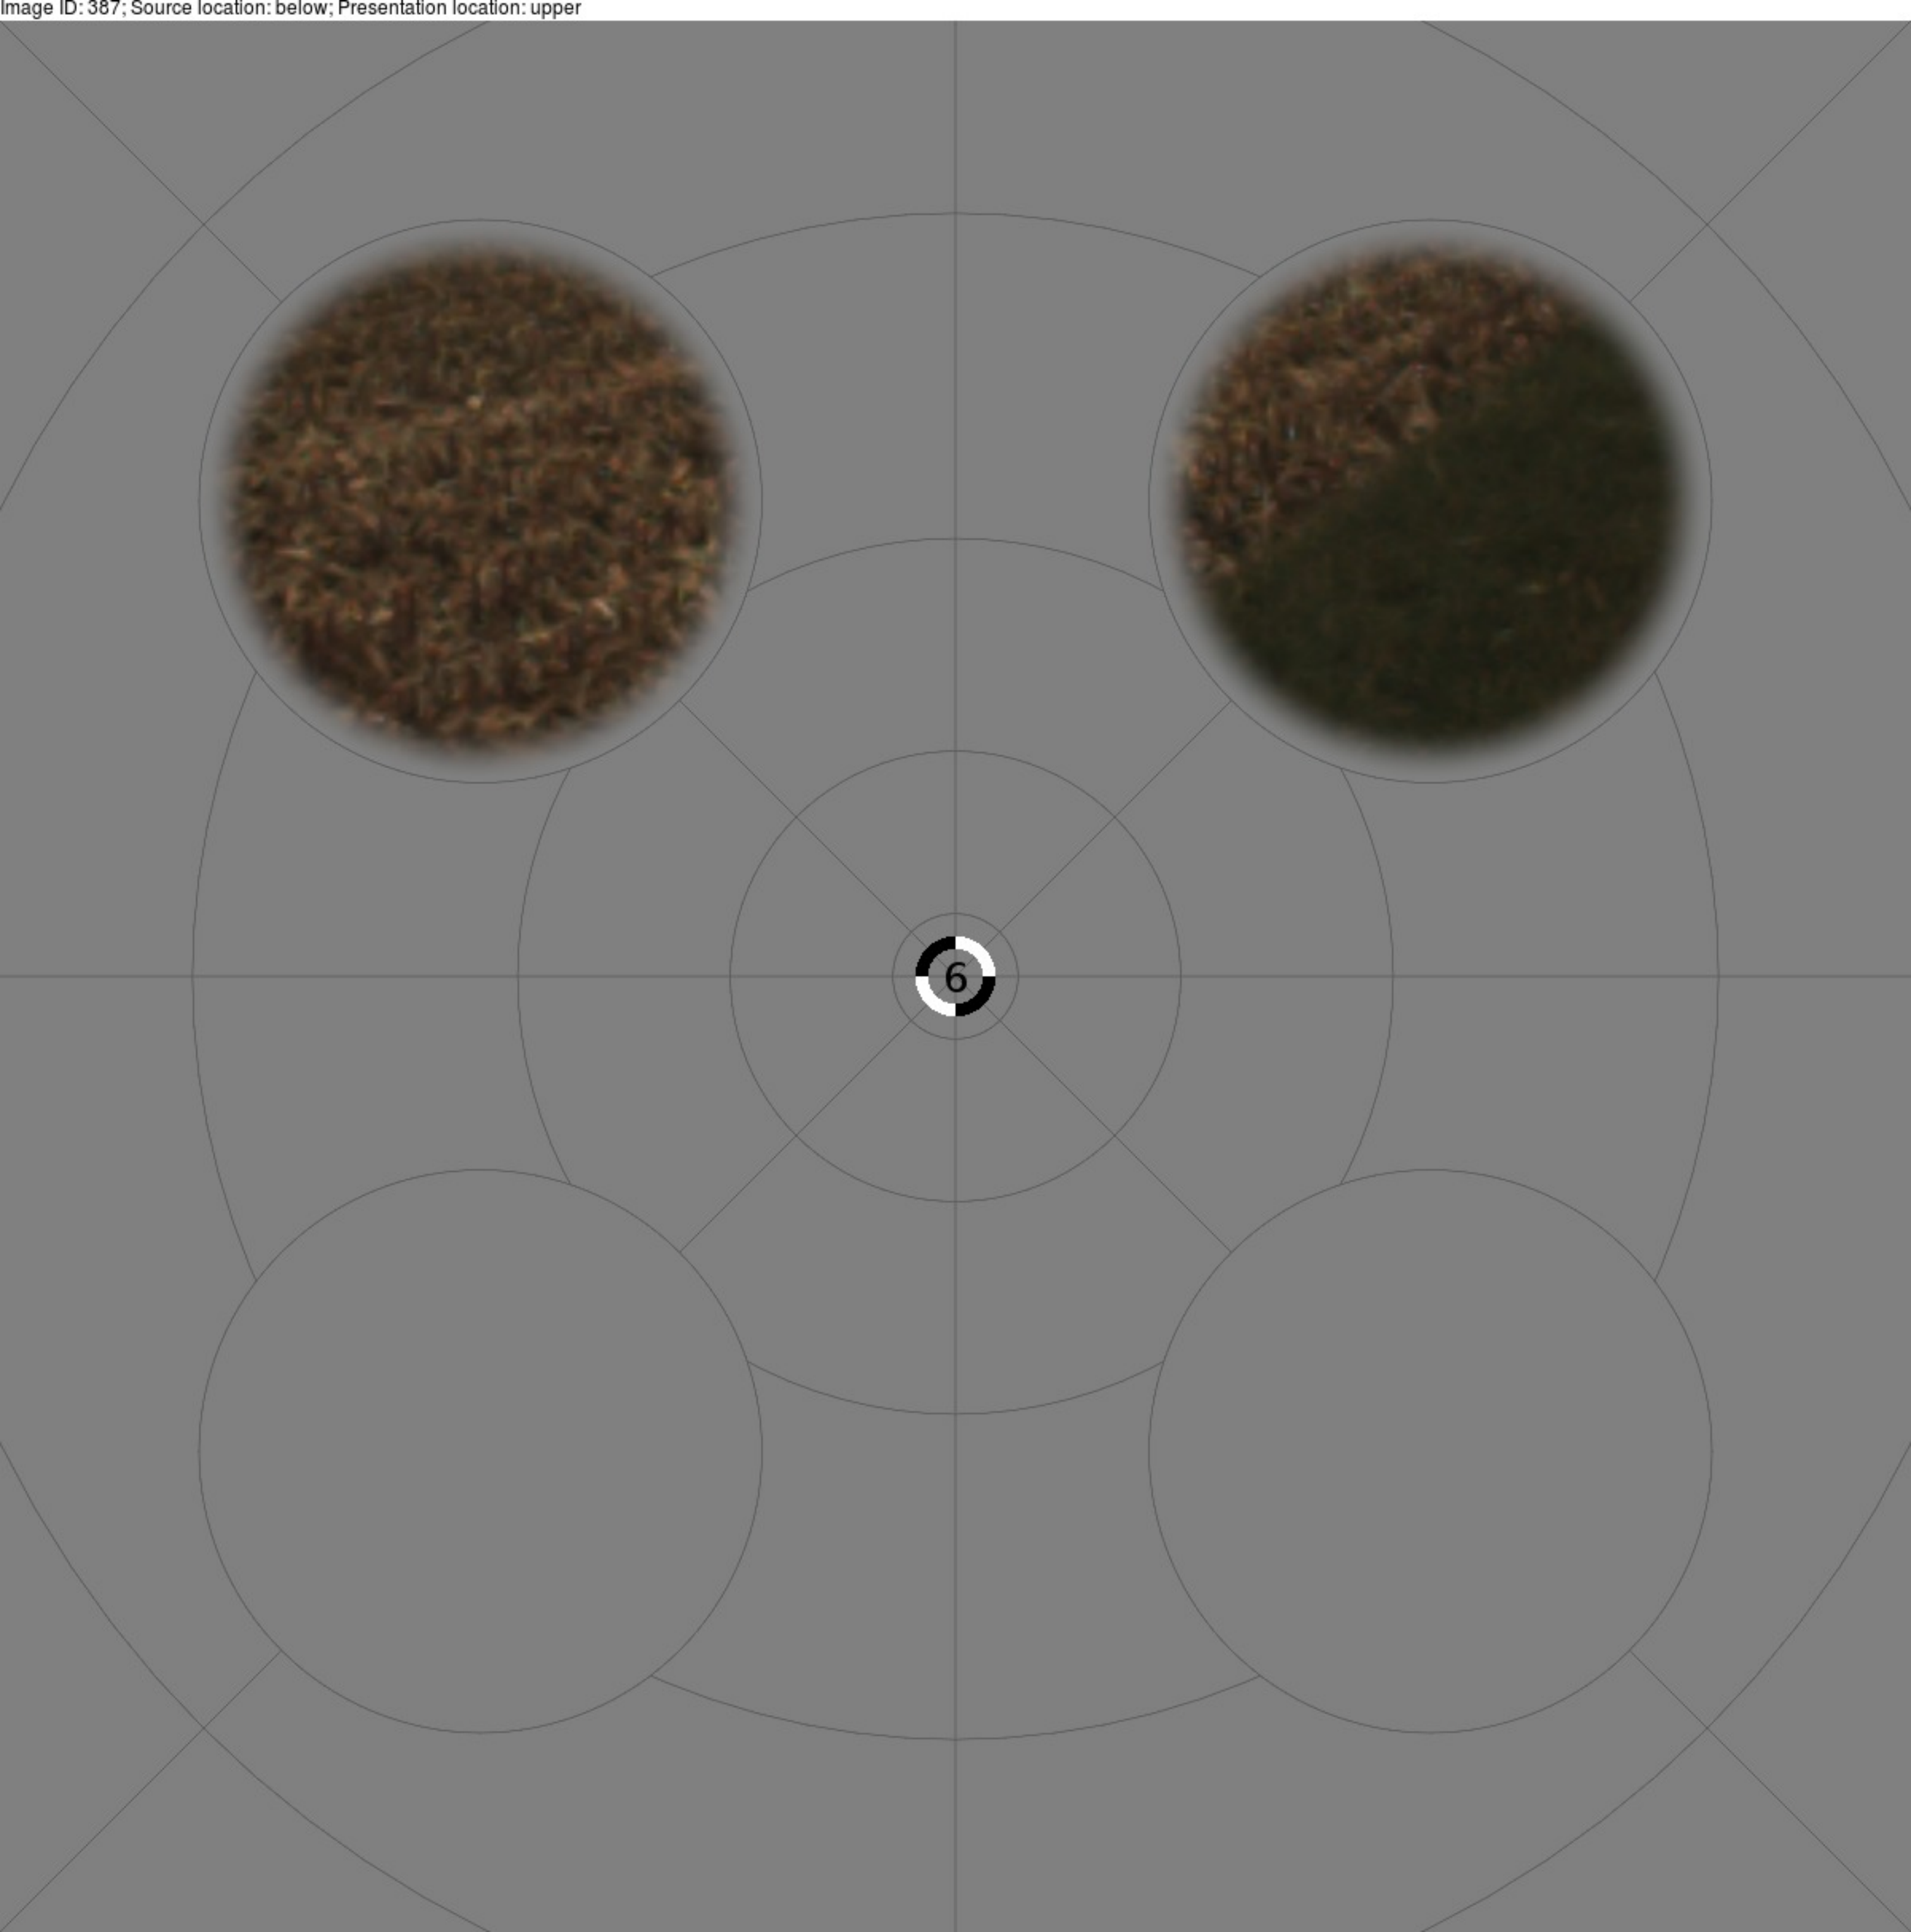

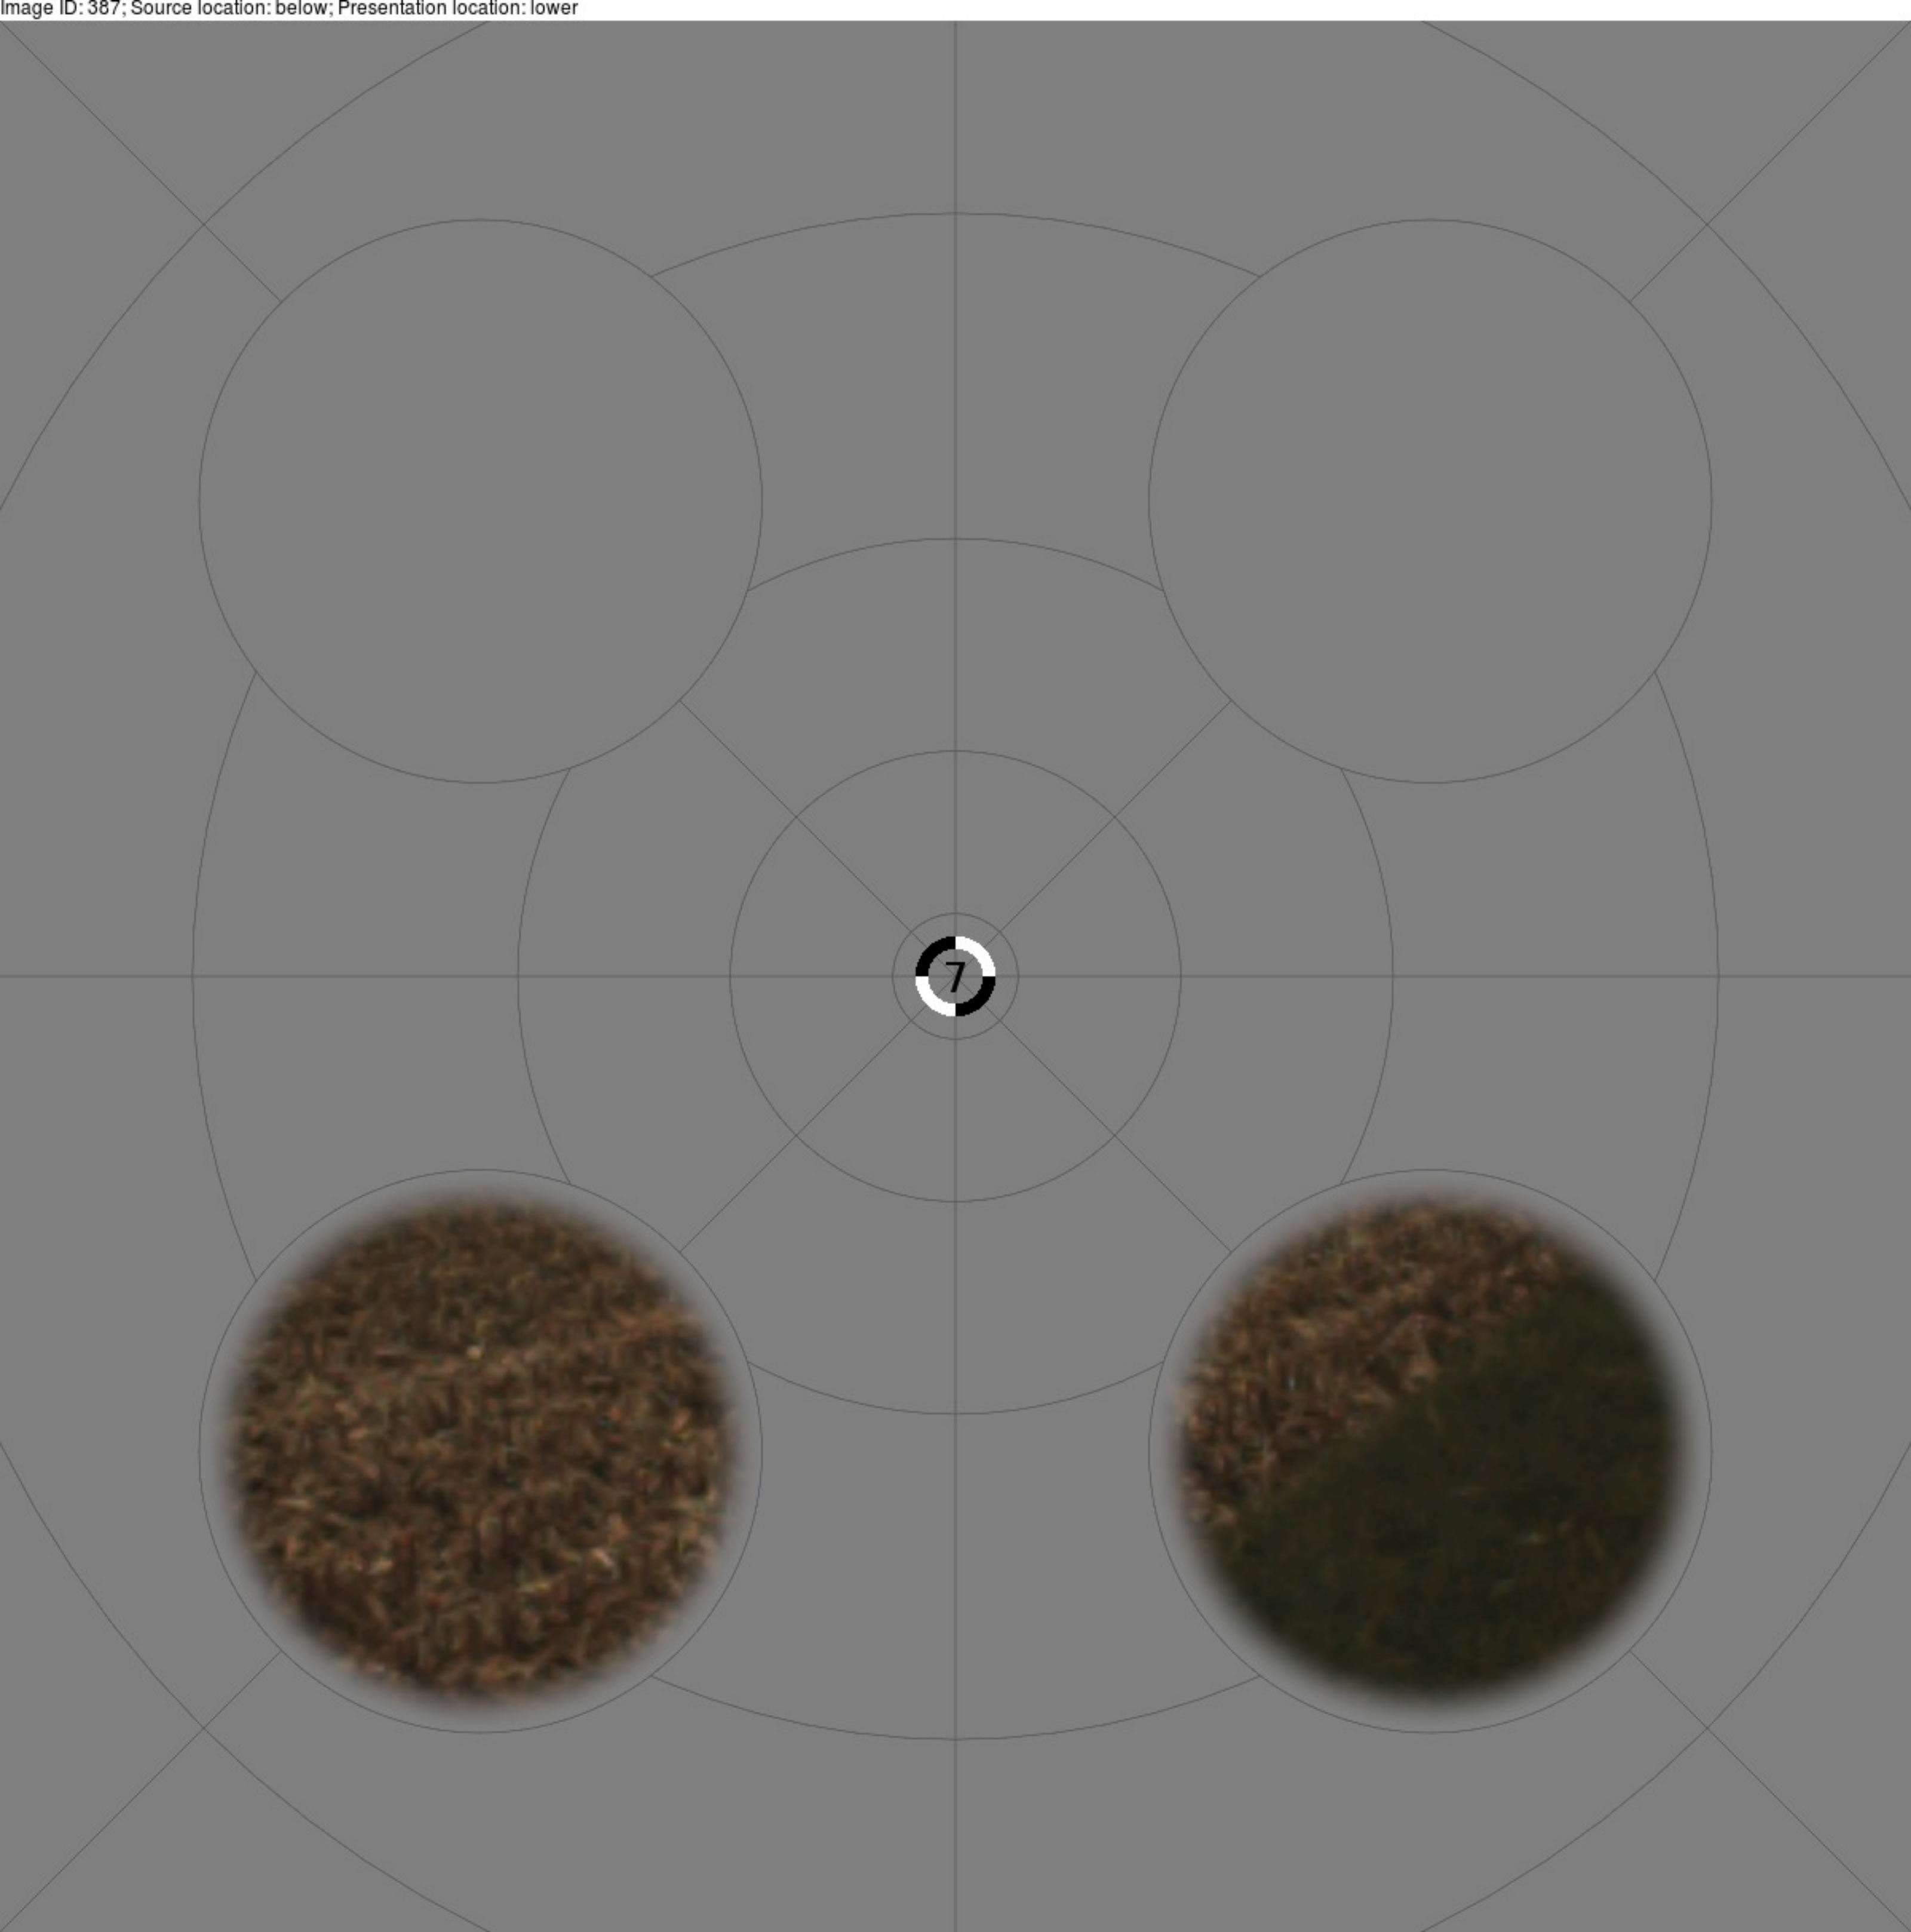



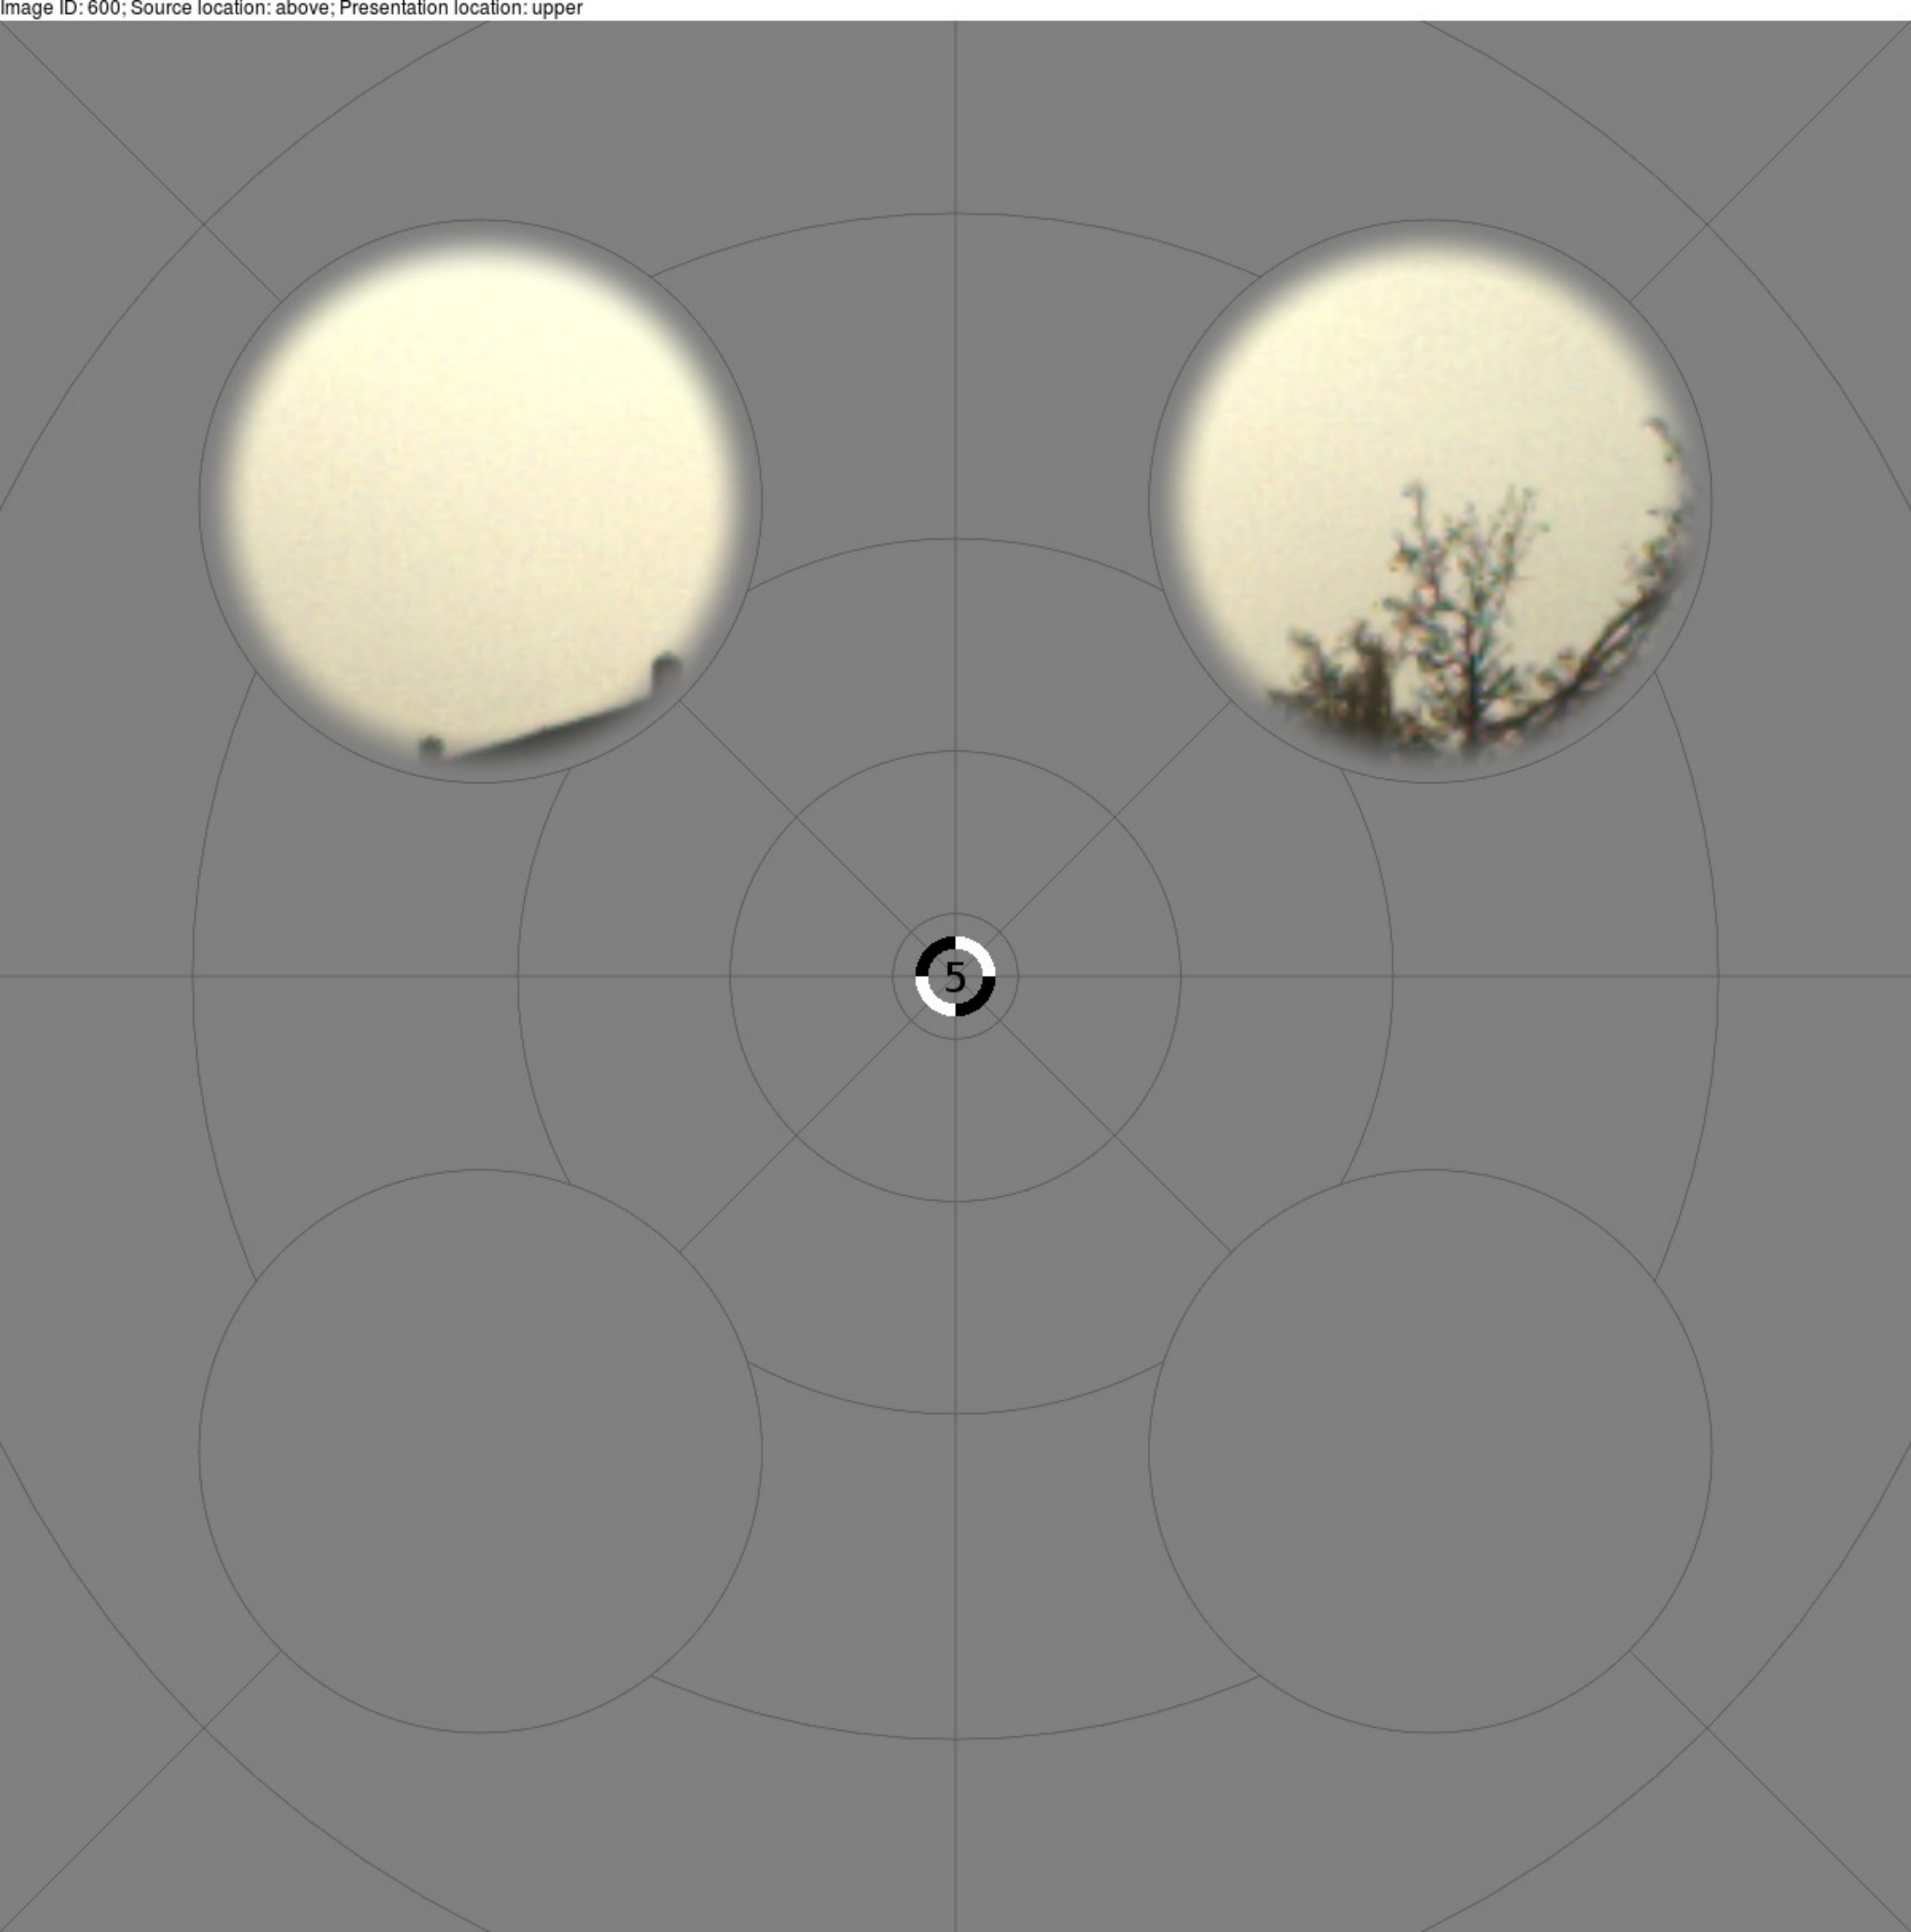

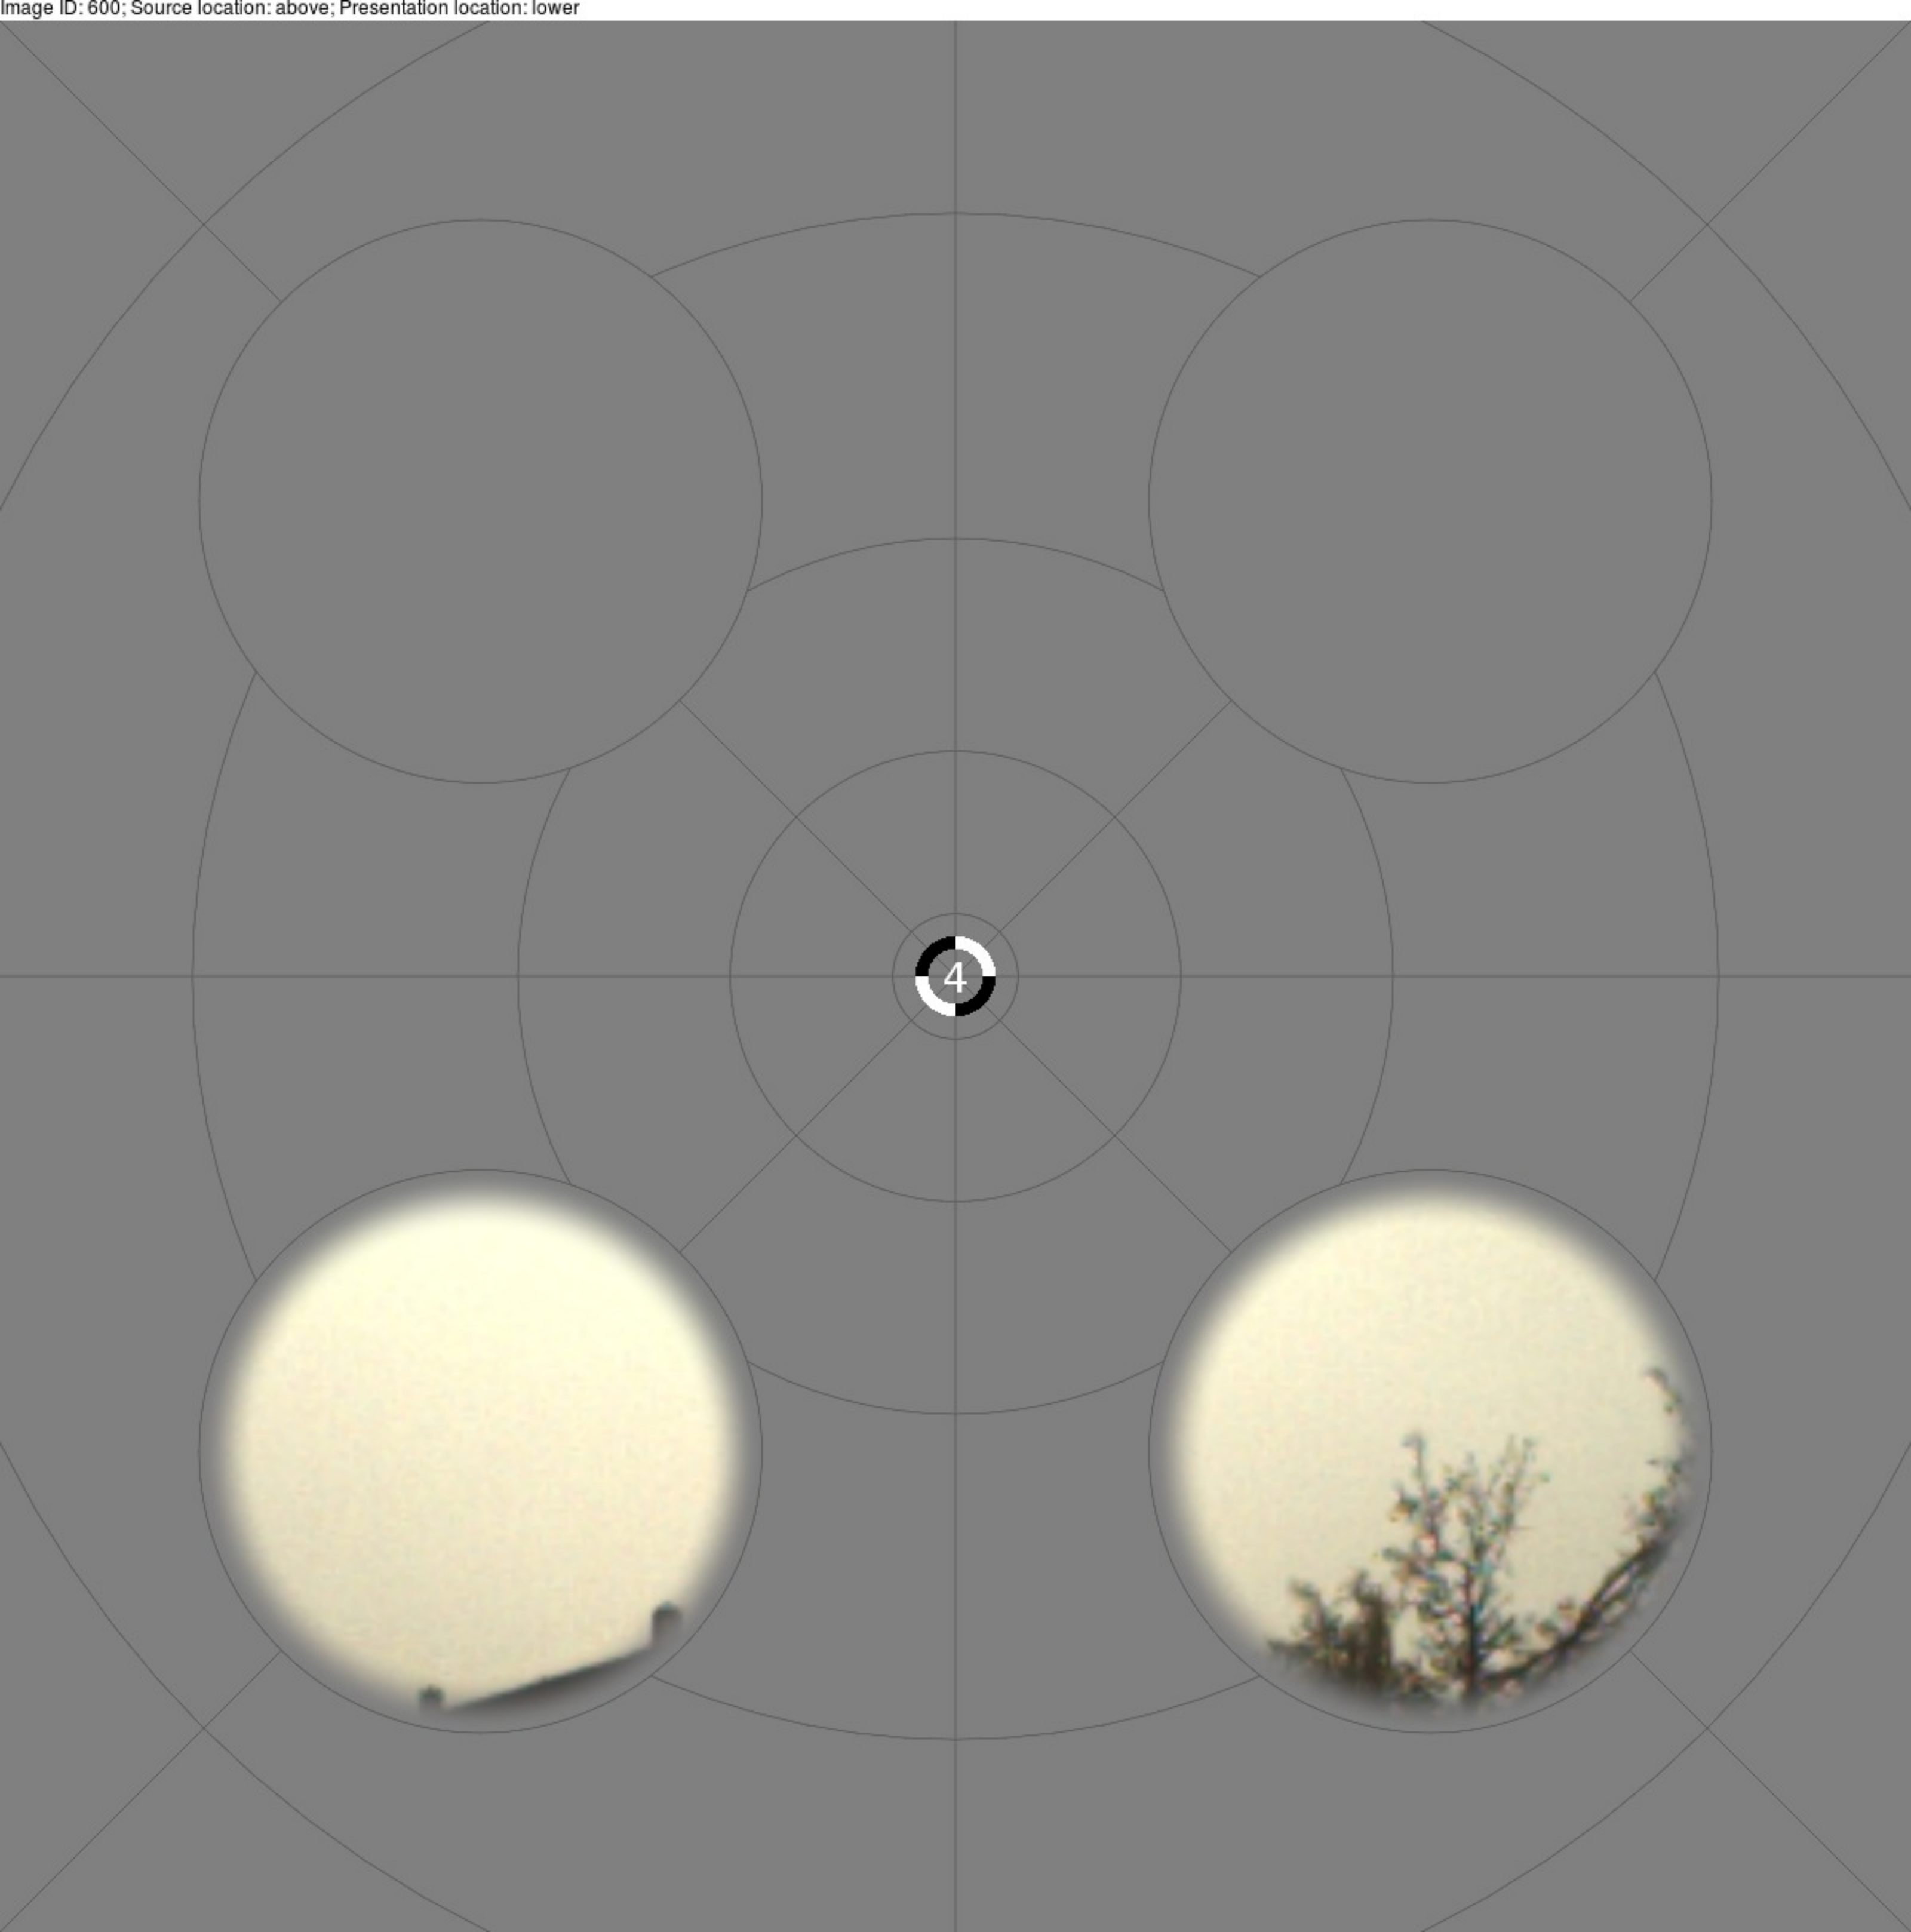

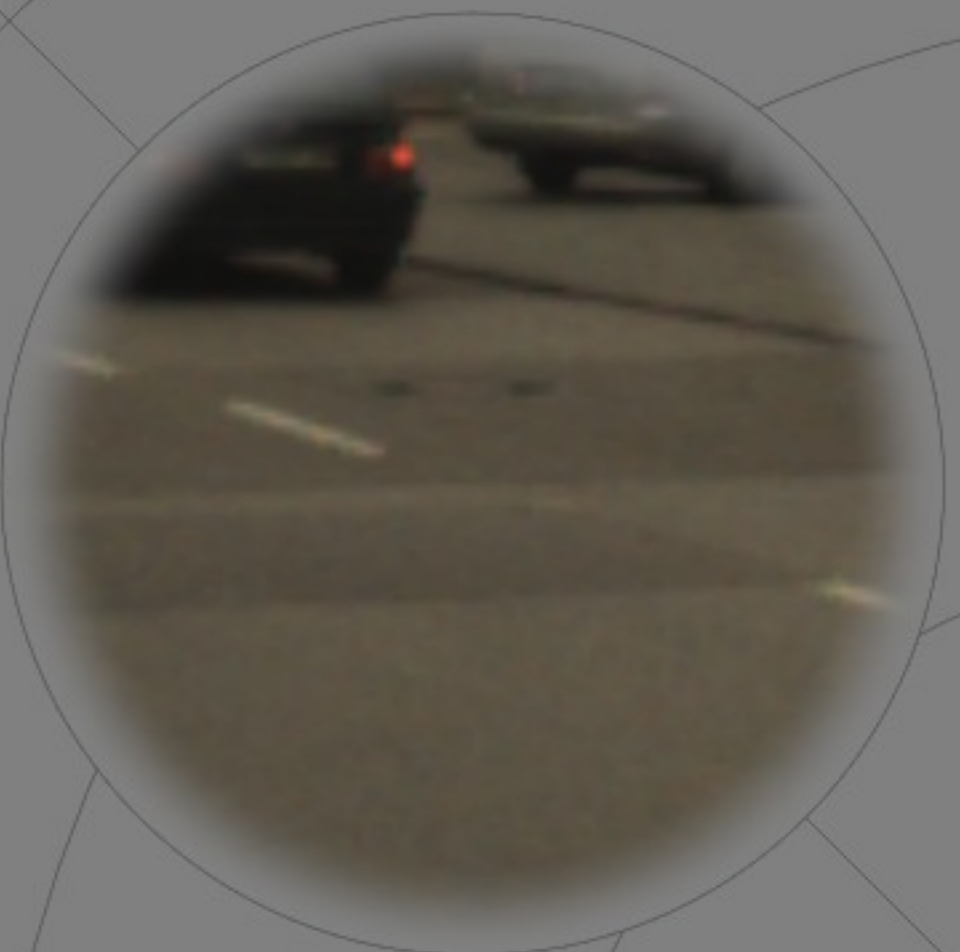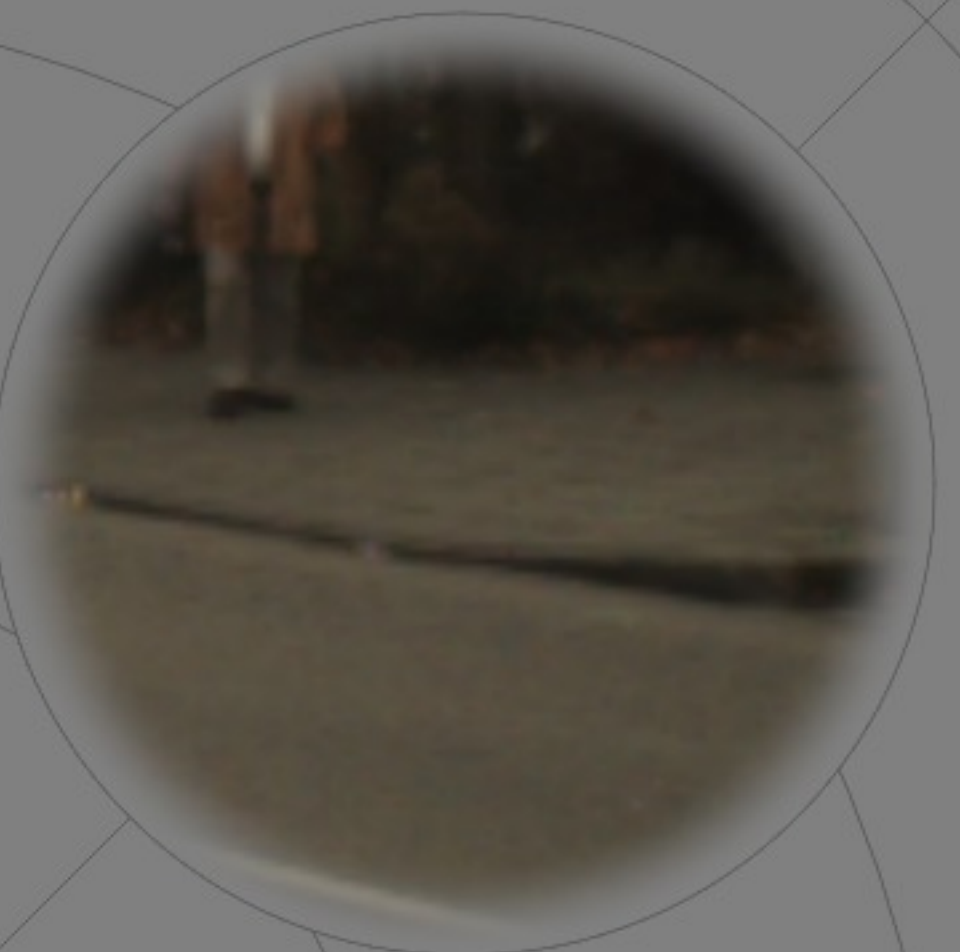

2



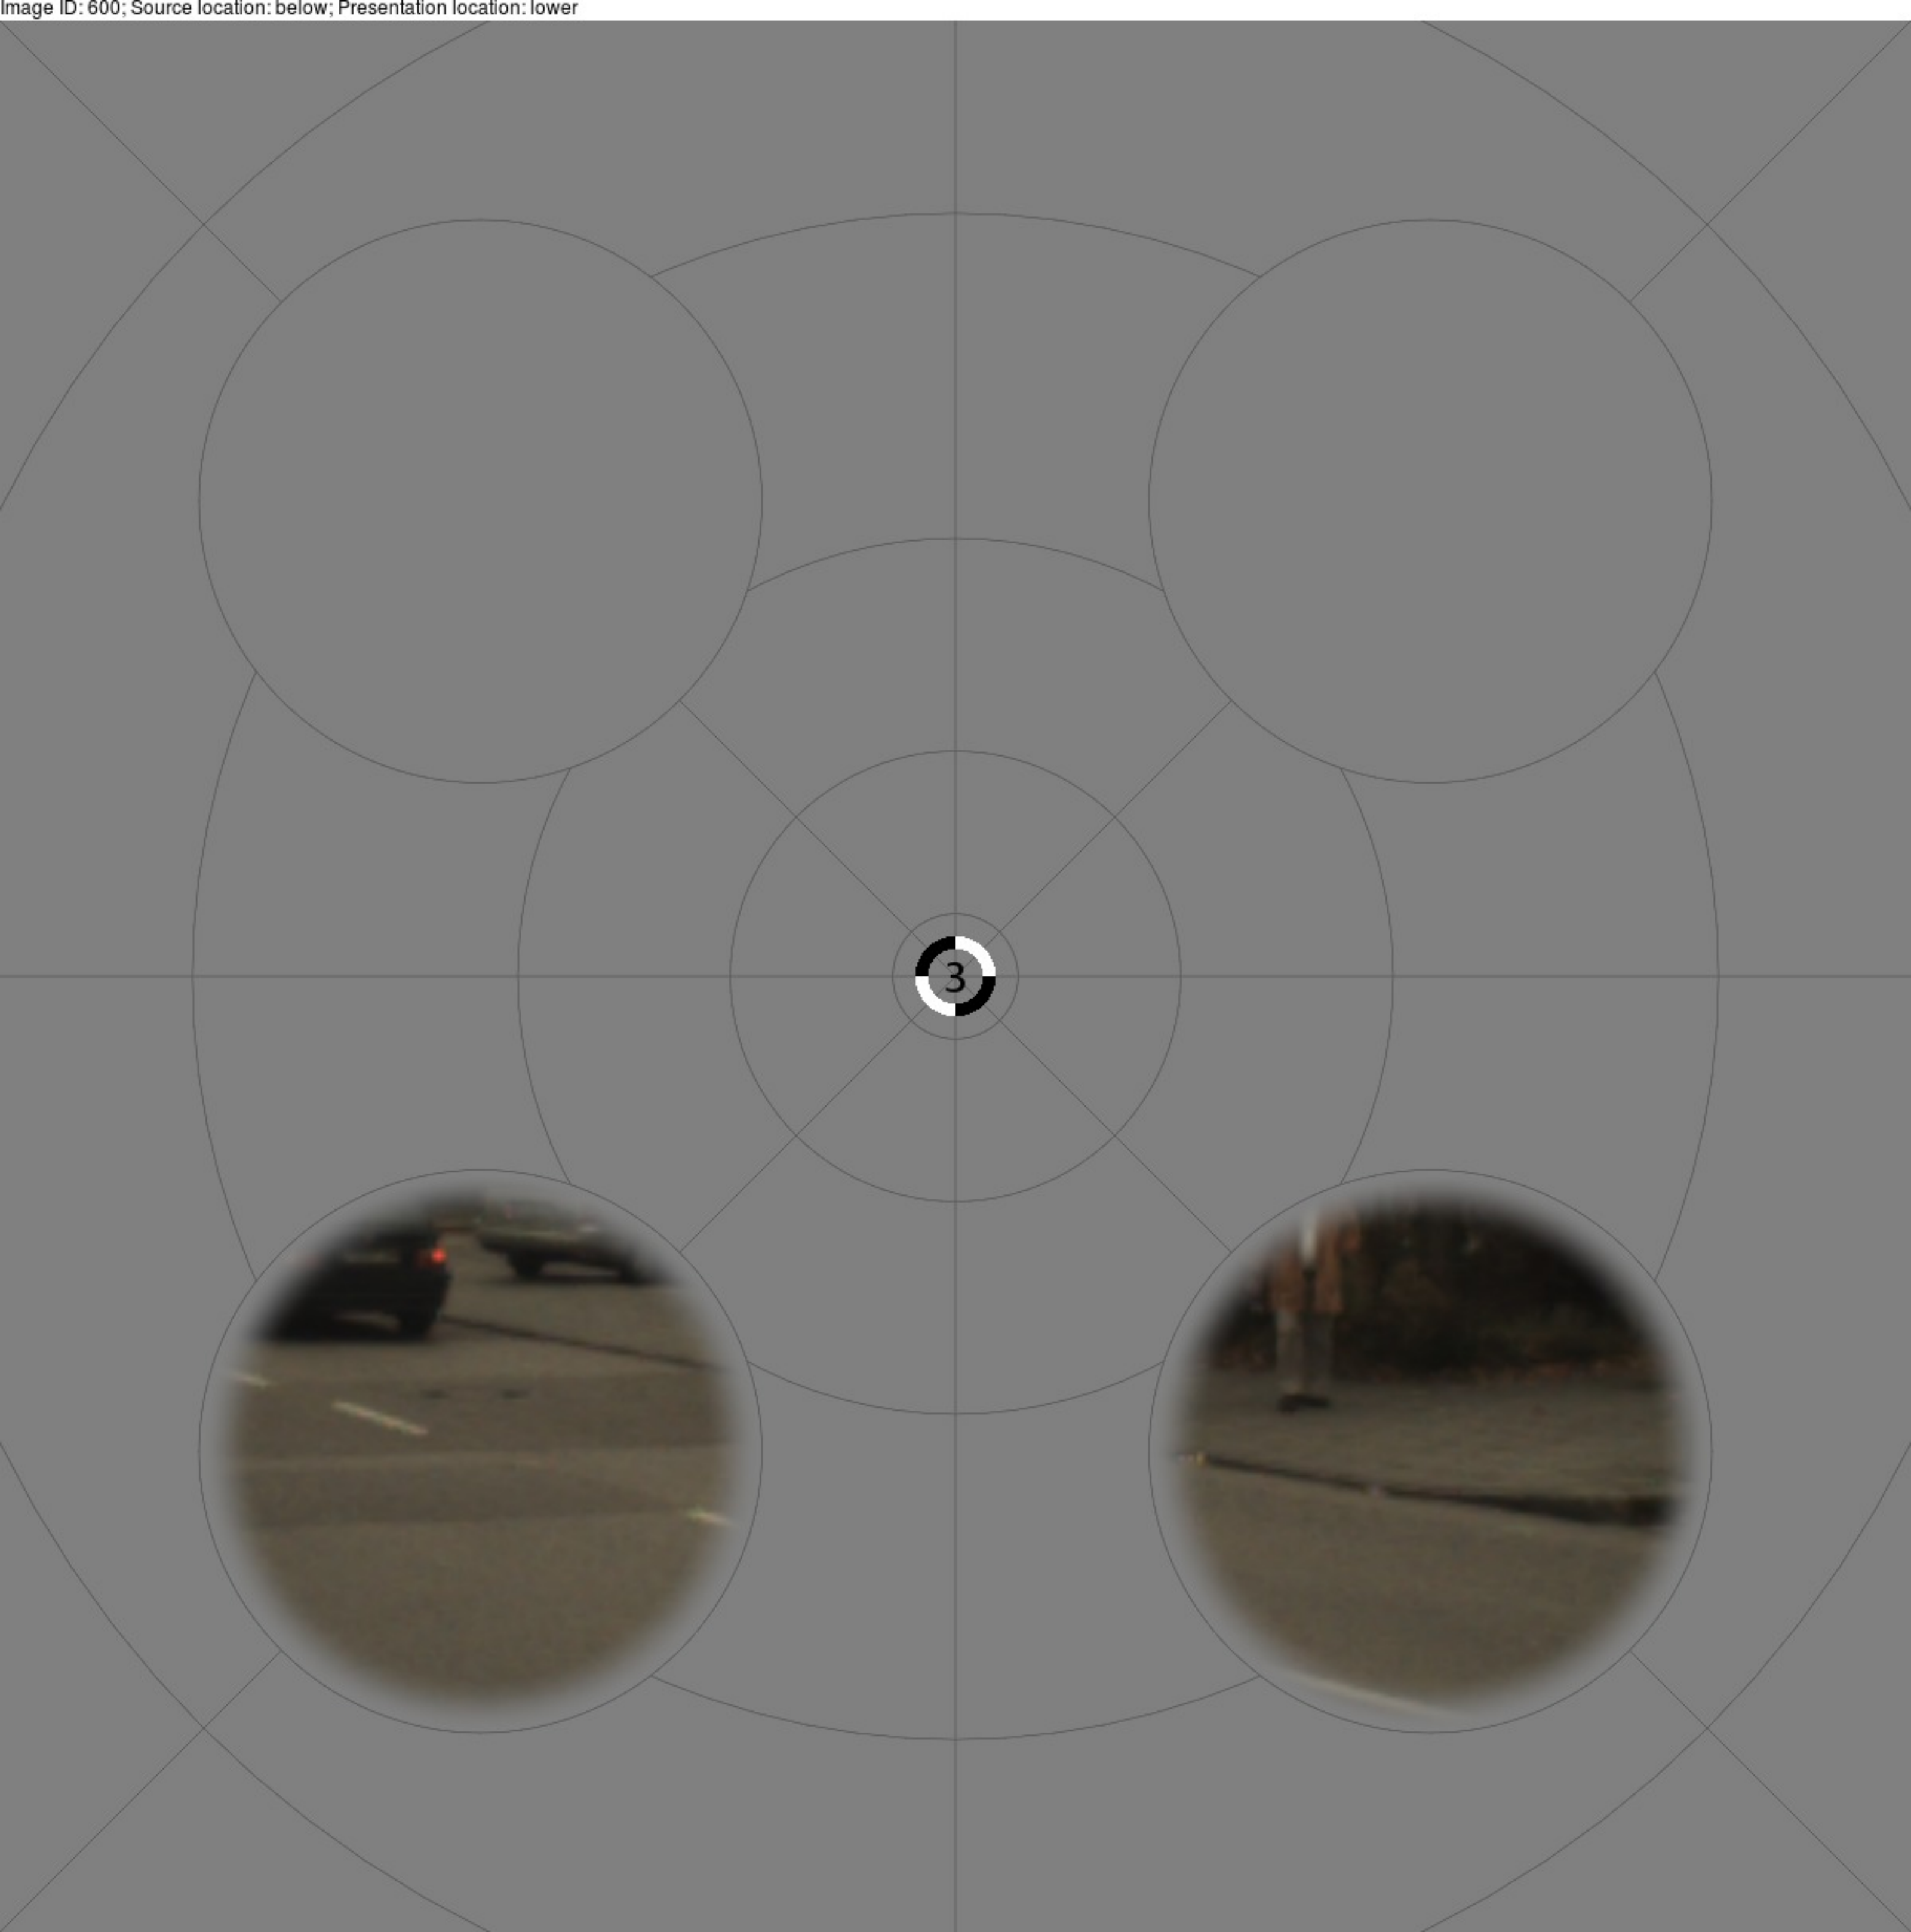

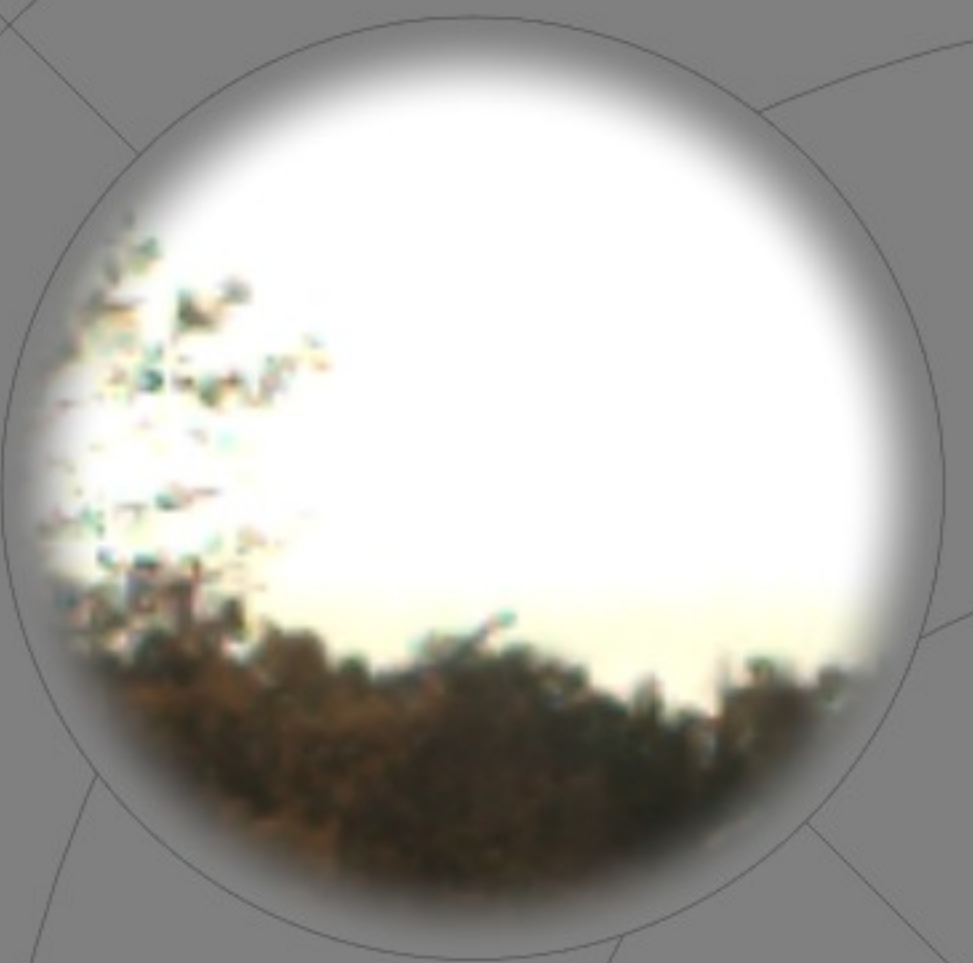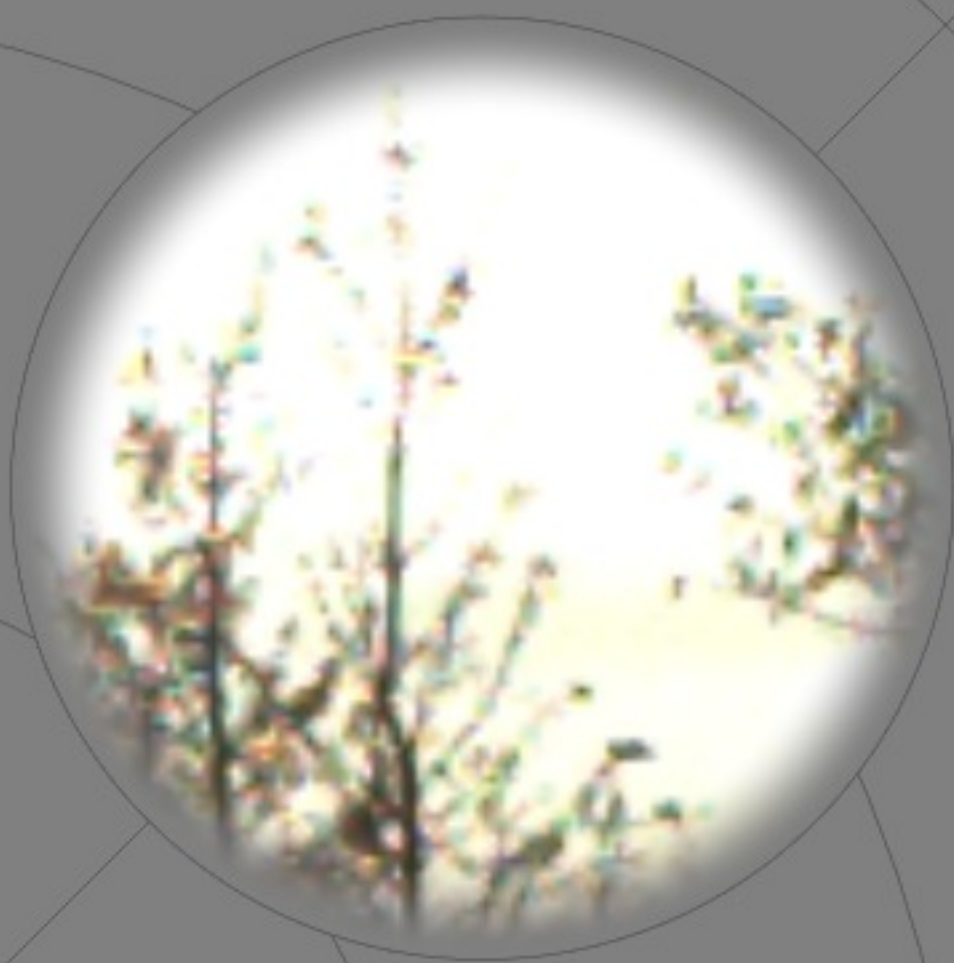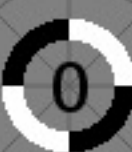

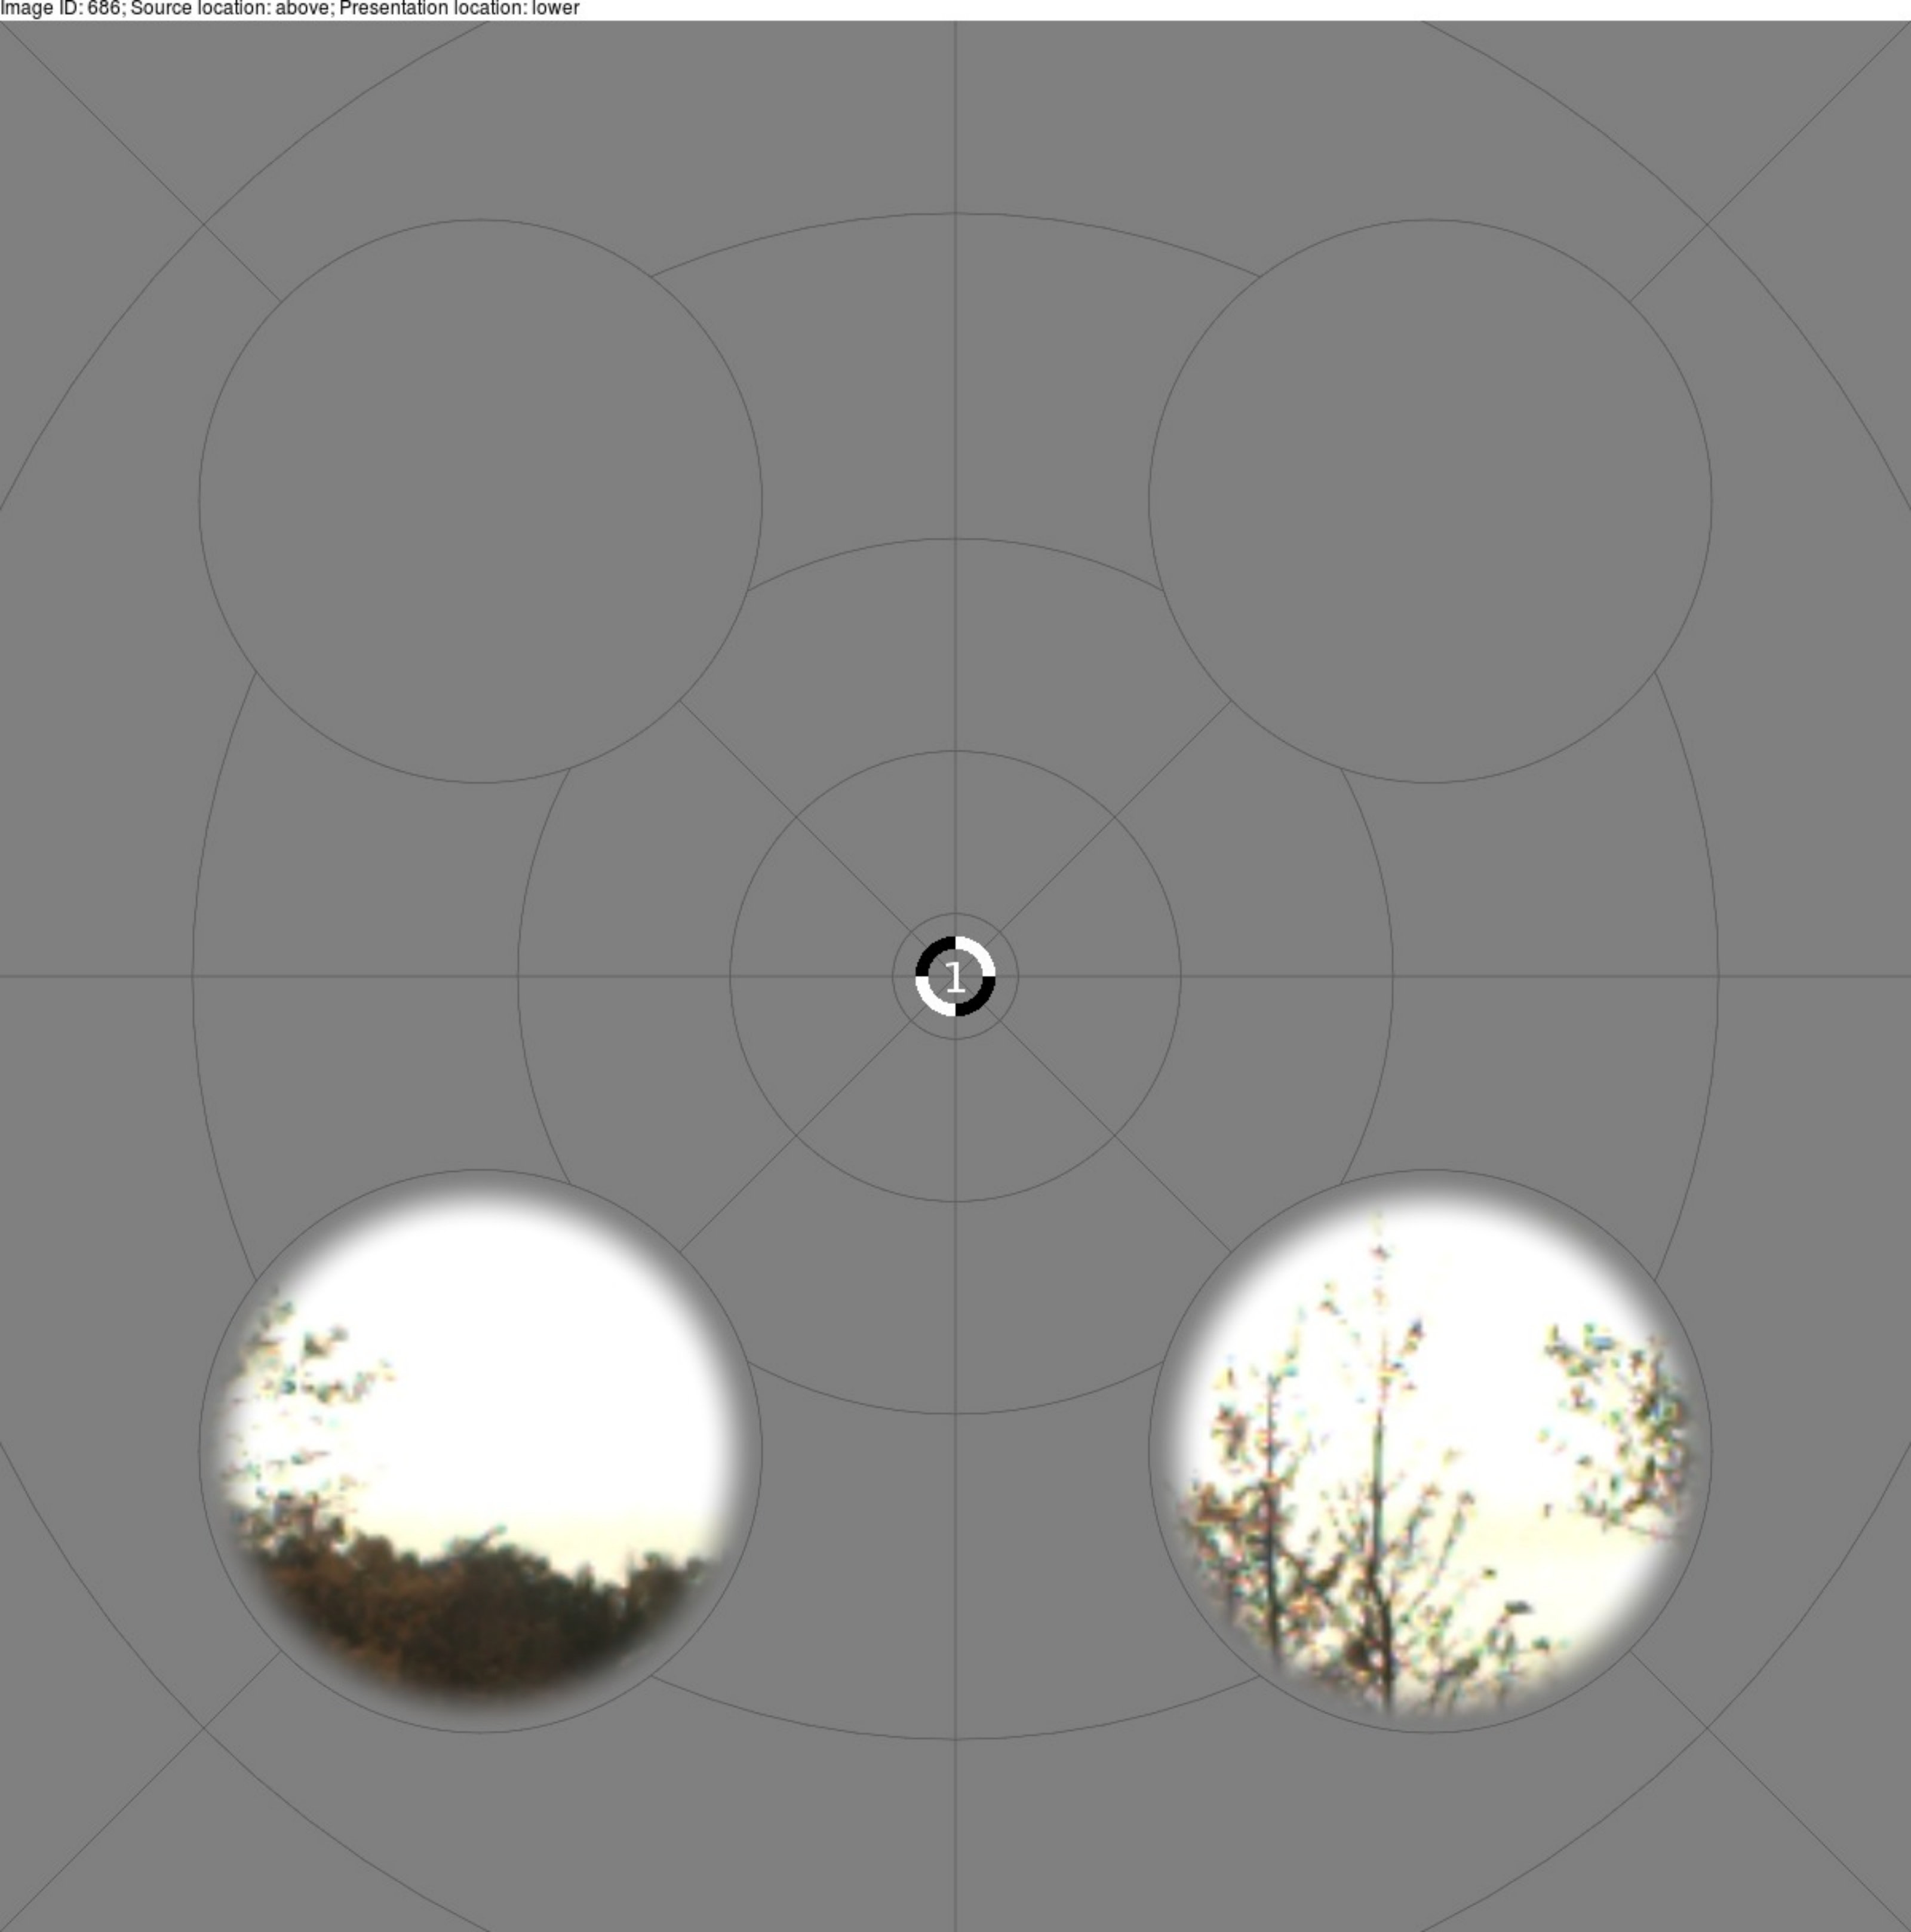



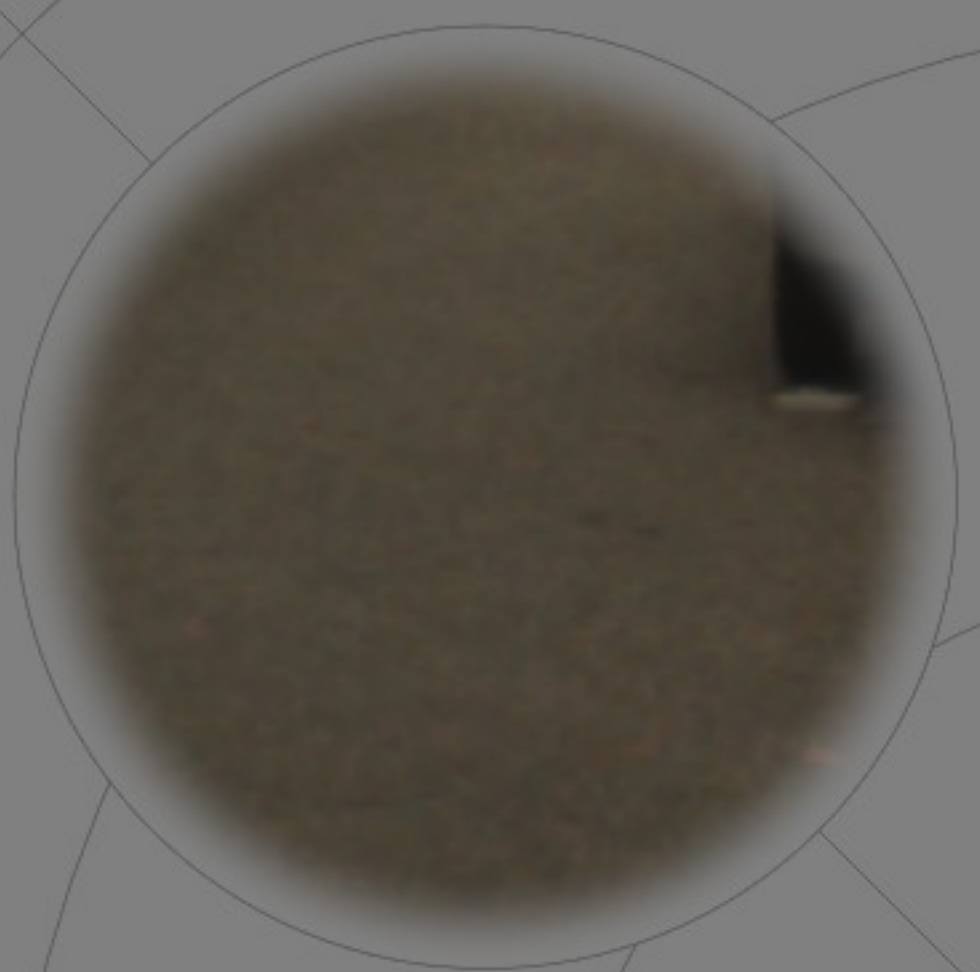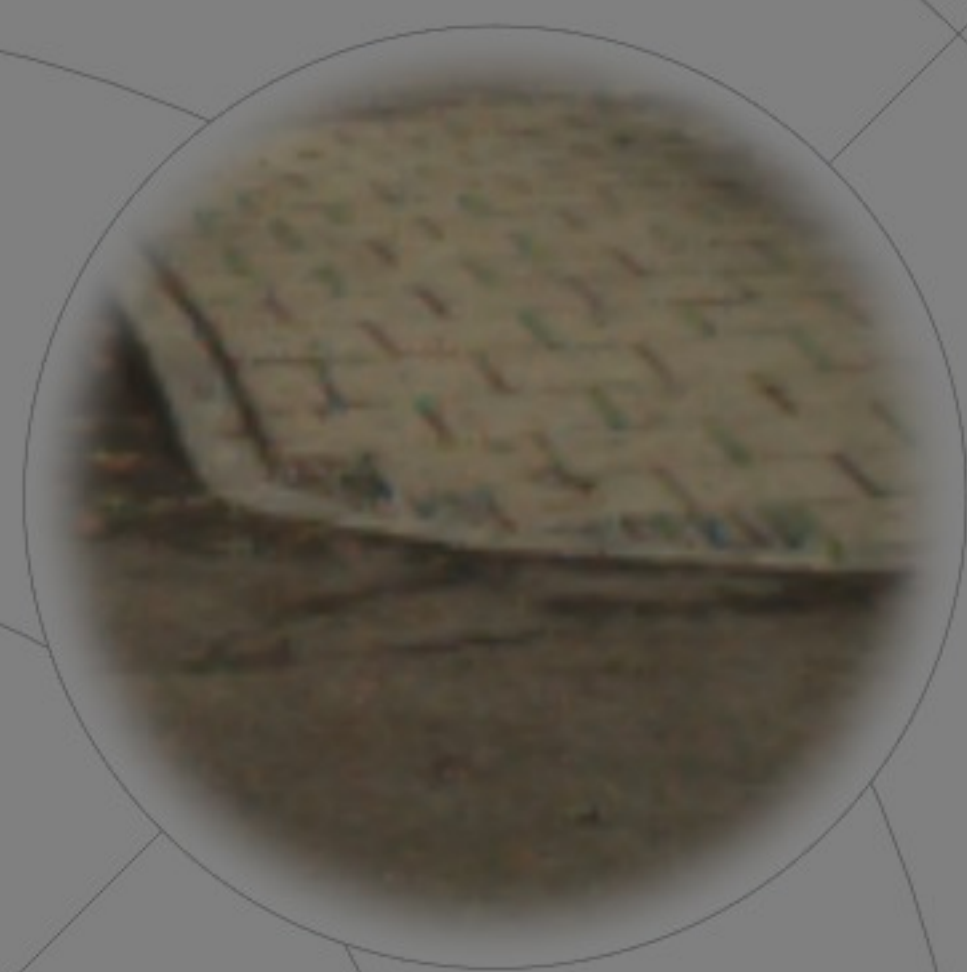

2

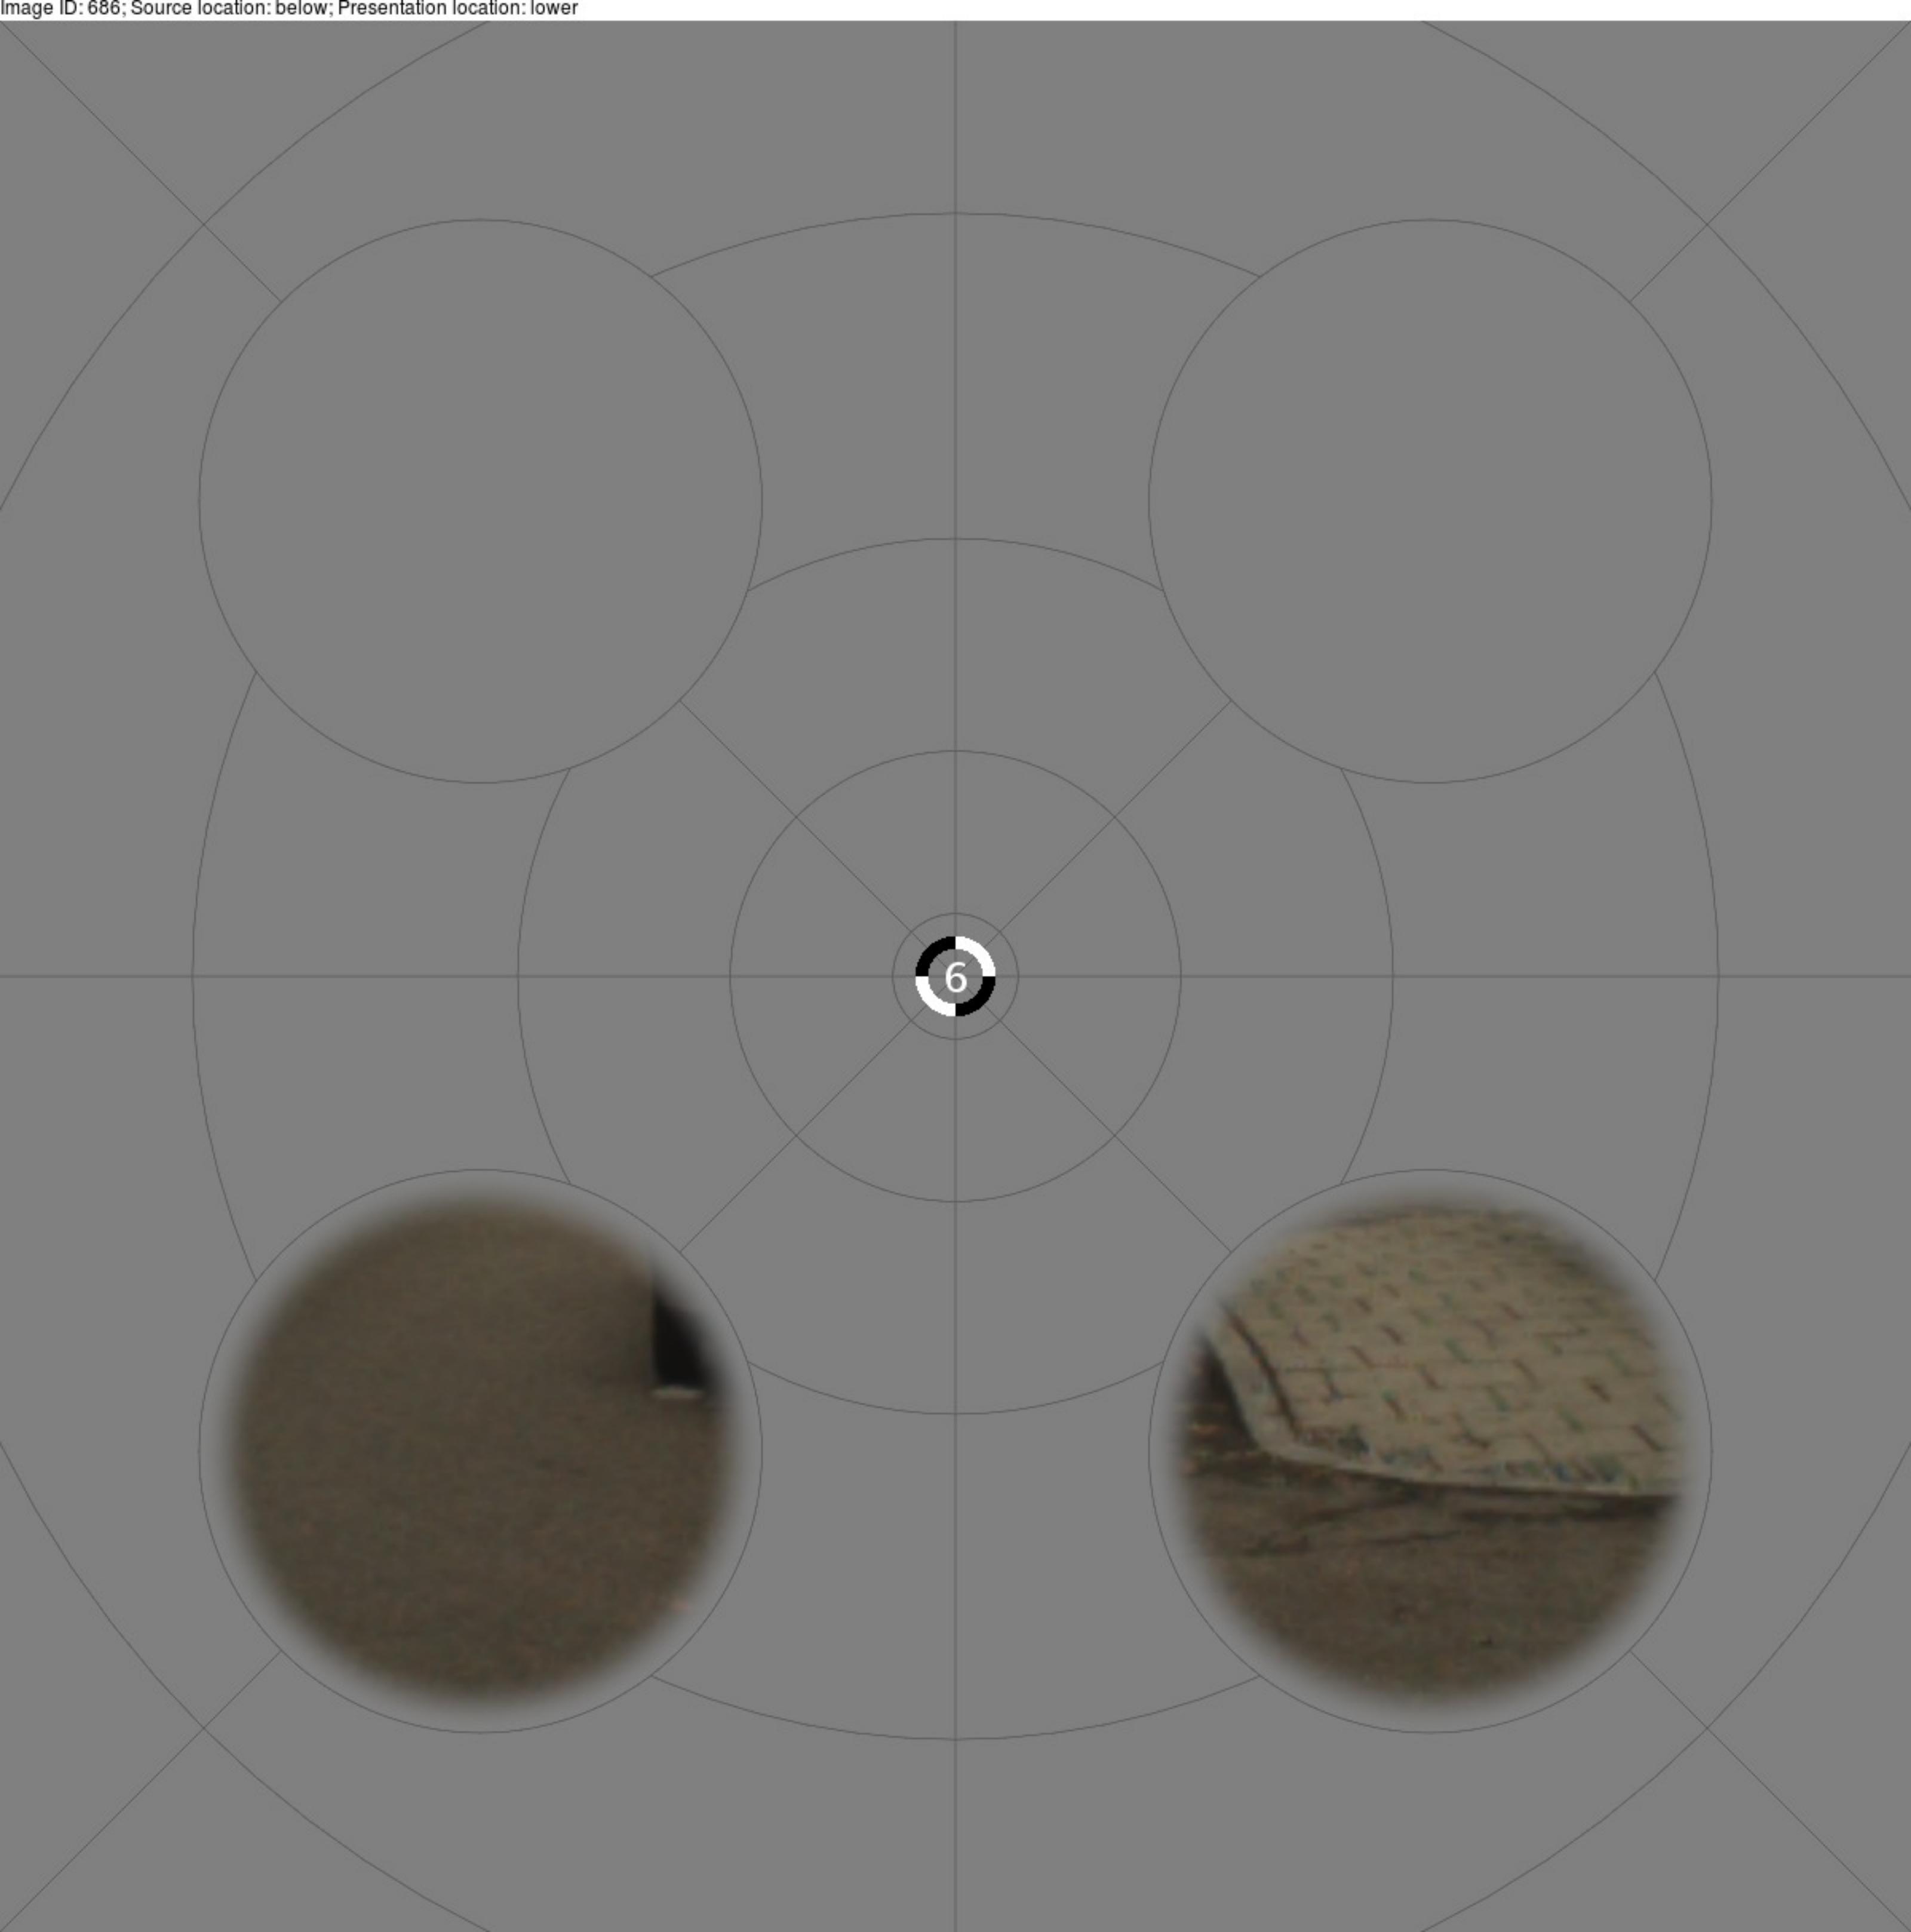

Supplement: ul_sens_fmri_supp_stim_set.pdf [file ul_sens_fmri_supp_stim_set.pdf]
