# Supplementary material for: Sensitivity to the visual field origin of natural image patches in human low-level visual cortex
Source: PeerJ journal article supplement (doi:10.7717/peerj.1038), 2015-06-23
Supplement: ul_sens_fmri_amp_anova_table.pdf [file ul_sens_fmri_amp_anova_table.pdf]

**Supplementary Table 1.** Complete ANOVA output for the three-way design (visual area  $\times$  presentation location  $\times$  source location).

| Effect                                                              | Statistic               | <i>p</i> |
|---------------------------------------------------------------------|-------------------------|----------|
| Visual area                                                         | $F_{1,60,9.57} = 0.356$ | 0.669    |
| Presentation location                                               | $F_{1,6} = 4.45$        | 0.079    |
| Source location                                                     | $F_{1,6} = 4.95$        | 0.068    |
| Visual area $\times$ presentation location                          | $F_{2,12} = 0.74$       | 0.499    |
| Visual area $\times$ source location                                | $F_{2,12} = 11.04$      | 0.002    |
| Presentation location $\times$ source location                      | $F_{1,6} = 11.19$       | 0.016    |
| Visual area $\times$ presentation location $\times$ source location | $F_{1.9,11.4} = 1.52$   | 0.260    |
