# Supplementary material for: Sensitivity to the visual field origin of natural image patches in human low-level visual cortex
Source: PeerJ journal article supplement (doi:10.7717/peerj.1038), 2015-06-23

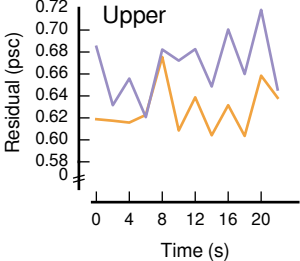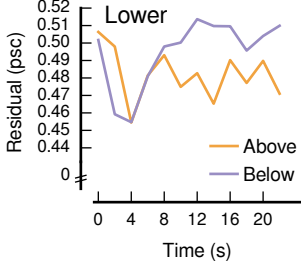

Supplement: ul_sens_resid.pdf [file ul_sens_resid.pdf]
